# Supplementary material
Source: PubMed Central journal article supplement (PMC4085637)
Supplement: mmc1.pdf [file mmc1.pdf]

The American Journal of Human Genetics, Volume 95

Supplemental Data

## **Effects of Long-Term Averaging of Quantitative Blood Pressure Traits on the Detection of Genetic Associations**

**Santhi K. Ganesh, Daniel I. Chasman, Martin G. Larson, Xiuqing Guo, Germain Verwoert, Joshua C. Bis, Xiangjun Gu, Albert V. Smith, Min-Lee Yang, Yan Zhang, Georg Ehret, Lynda M. Rose, Shih-Jen Hwang, George J. Papanicolau, Eric J. Sijbrands, Kenneth Rice, Gudny Eiriksdottir, Vasyl Pihur, Paul M. Ridker, Ramachandran S. Vasan, Christopher Newton-Cheh, Global Blood Pressure Genetics Consortium, Leslie J. Raffel, Najaf Amin, Jerome I. Rotter, Kiang Liu, Lenore J. Launer, Ming Xu, Mark Caulfield, Alanna C. Morrison, Andrew D. Johnson, Dhananjay Vaidya, Abbas Dehghan, Guo Li, Claude Bouchard, Tamara B. Harris, He Zhang, Eric Boerwinkle, David S. Siscovick, Wei Gao, Andre G. Uitterlinden, Fernando Rivadeneira, Albert Hofman, Cristen J. Willer, Oscar H. Franco, Yong Huo, Jacqueline C.M. Witteman, Patricia B. Munroe, Vilmundur Gudnason, Walter Palmas, Cornelia van Duijn, Myriam Fornage, Daniel Levy, Bruce M. Psaty, and Aravinda Chakravarti**

**FIGURE S1: Study design summary.**

The study design of the long-term averaged (LTA) analysis is summarized to accomplish the goals of firstly, identifying novel BP associations, which were replicated in an independent sample, and secondly characterizing the impact of LTA on genetic associations as compared to single-visit (V1) BP associations.

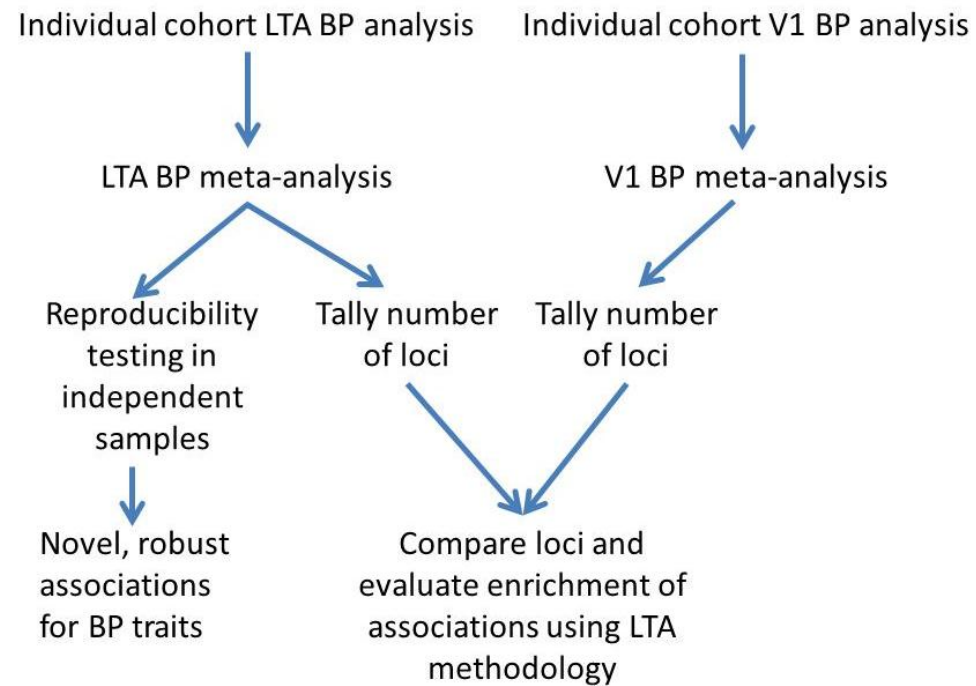

**FIGURE S2. QQ plots for LTA BP traits and single visit (V1) SBP and DBP.**

Quantile-quantile (QQ) plots are shown for (a) LTA and V1 SBP traits, (b) LTA and V1 DBP traits, (c) LTA-MAP and (d) LTA-PP. The null hypothesis is shown as the orange line. The 95% confidence interval around the null is shown in gray.

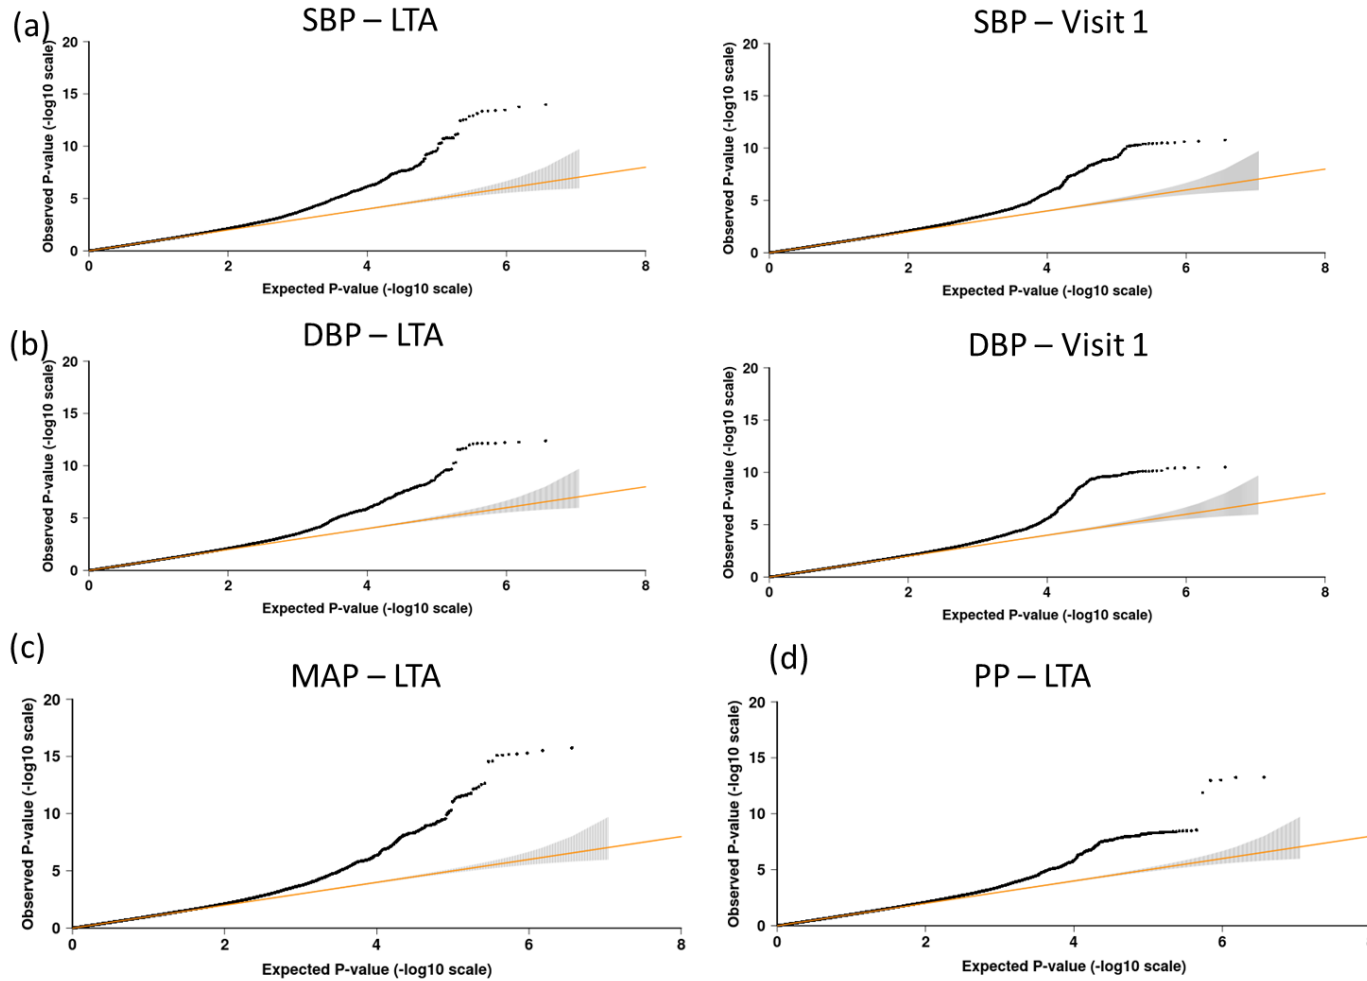

**FIGURE S3. Genome-wide association studies:  $-\log P$  values for (a) LTA-MAP and (b) LTA-PP.**

Genome wide association studies'  $-\log P$  plots are shown for LTA-MAP and LTA-PP traits. Regions with SNP associations reaching  $P$  value  $< 5 \times 10^{-8}$  are shown in red, and regions reaching  $P$  value  $< 5 \times 10^{-7}$  are shown in blue.

(a) LTA-MAP

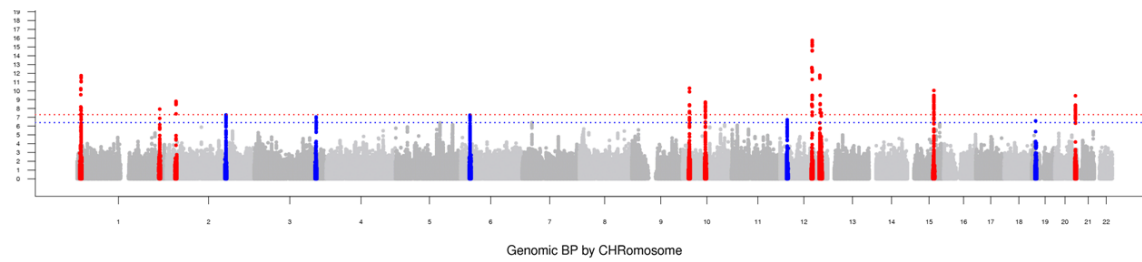

(b) LTA-PP

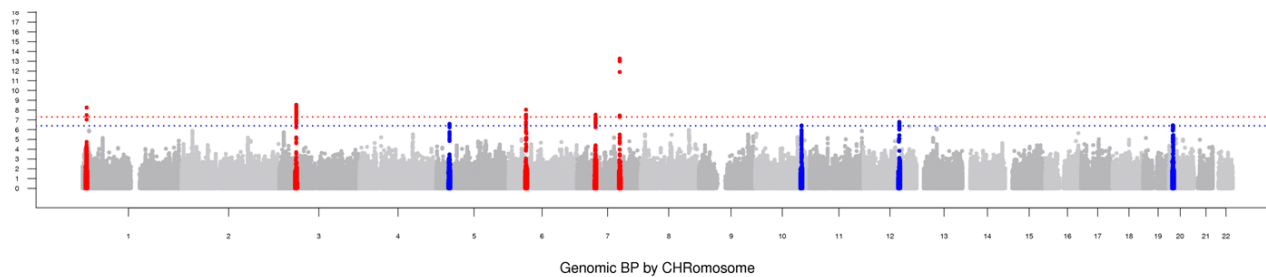



**FIGURE S4. QQ plots for SBP and DBP traits showing associations statistics for both LTA and V1 traits.**

Genome-wide association statistics for SBP and DBP analyses using LTA versus V1 only in quantile-quantile plots of LTA-SBP and LTA-DBP, with corresponding V1-SBP and V1-DBP results. The distribution of  $P$  values is shown with SNPs plotted in blue corresponding to V1 results, and SNPs plotted in green corresponding to LTA analysis results.

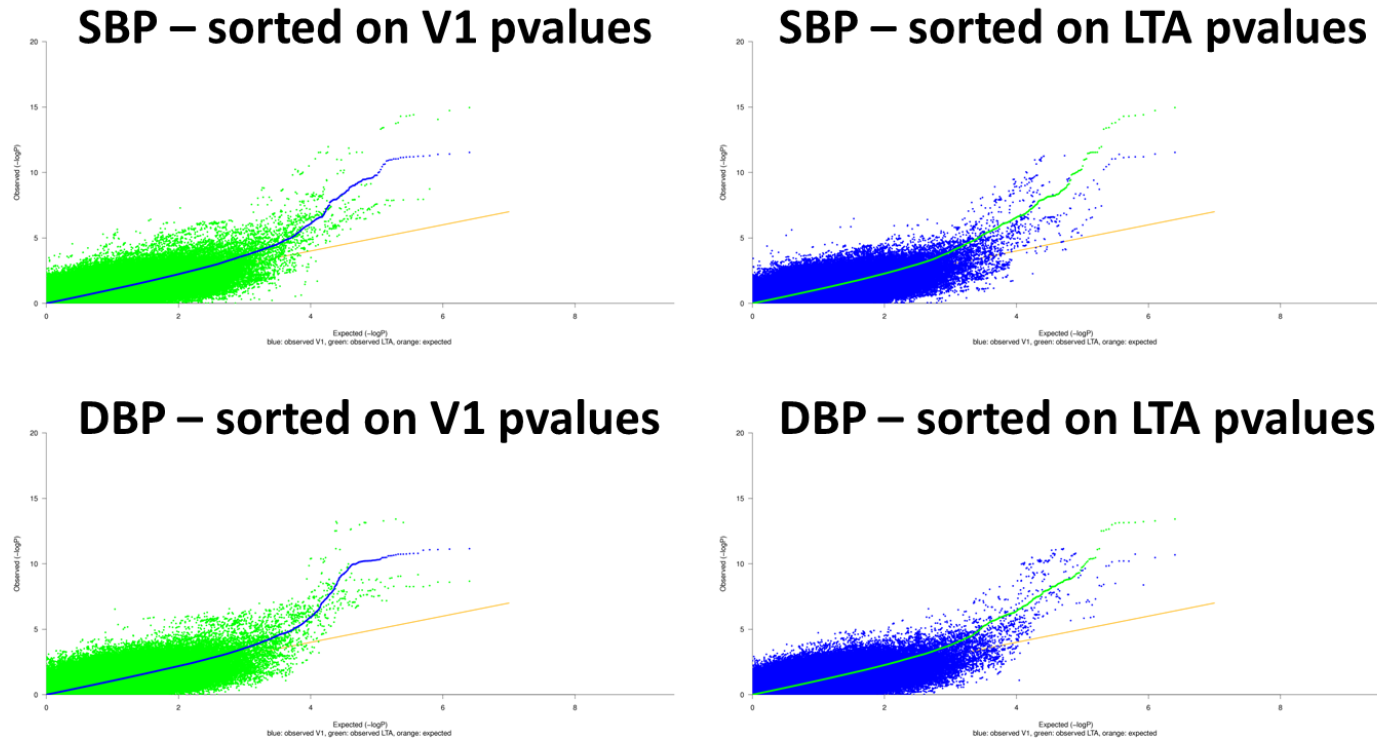

**FIGURE S5. Genome-wide association statistics for SBP and DBP analyses using LTA versus V1.**

Genome-wide association statistics for SBP and DBP analyses using LTA versus V1, with LTA values plotted on the X-axis and V1 on the Y-axis, for the effect size (beta, regression) estimate, standard error, chi-squared values and the normalized regression estimate (beta recalculated as the raw beta divided by the standard deviation of the phenotype).

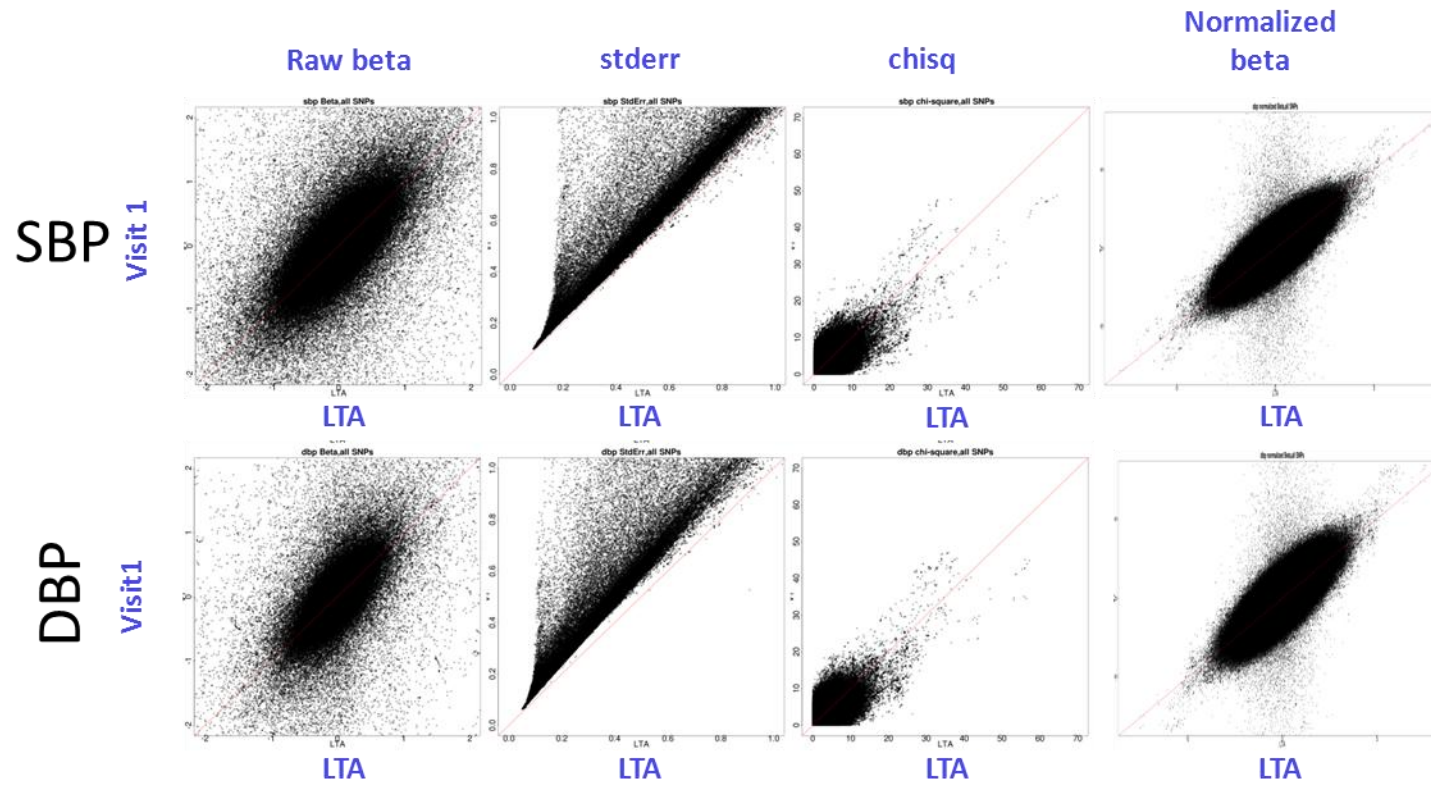

FIGURE S6.  $-\log P$  value plots for regions identified in the LTA analysis incorporating LD estimates and annotation of nonsynonymous SNPs for each of the new 5 SNP-trait associations we identified in the LTA analysis (a-e).

(a)

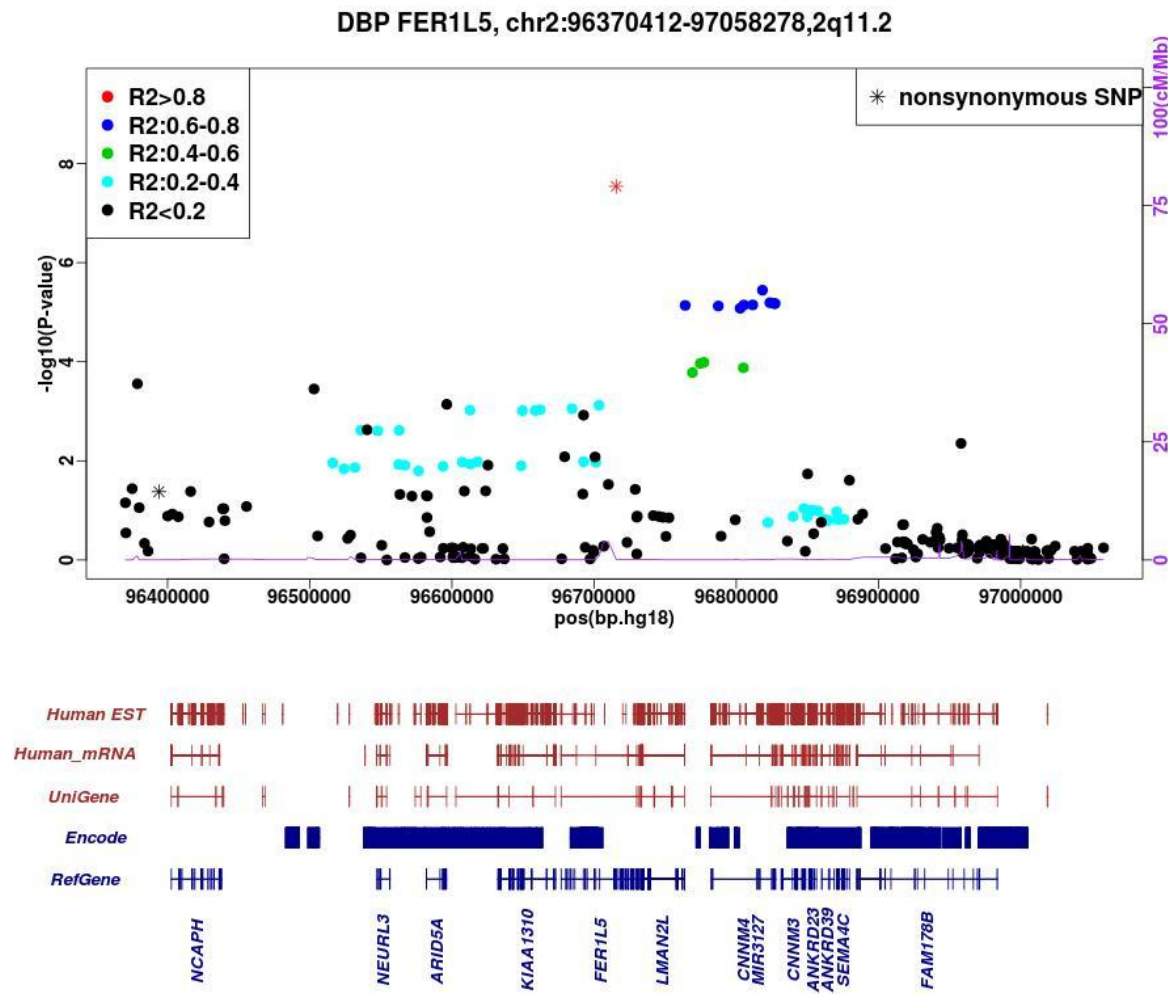

(b)

MAP KCNK3, chr2:26520634-27016548,2p23

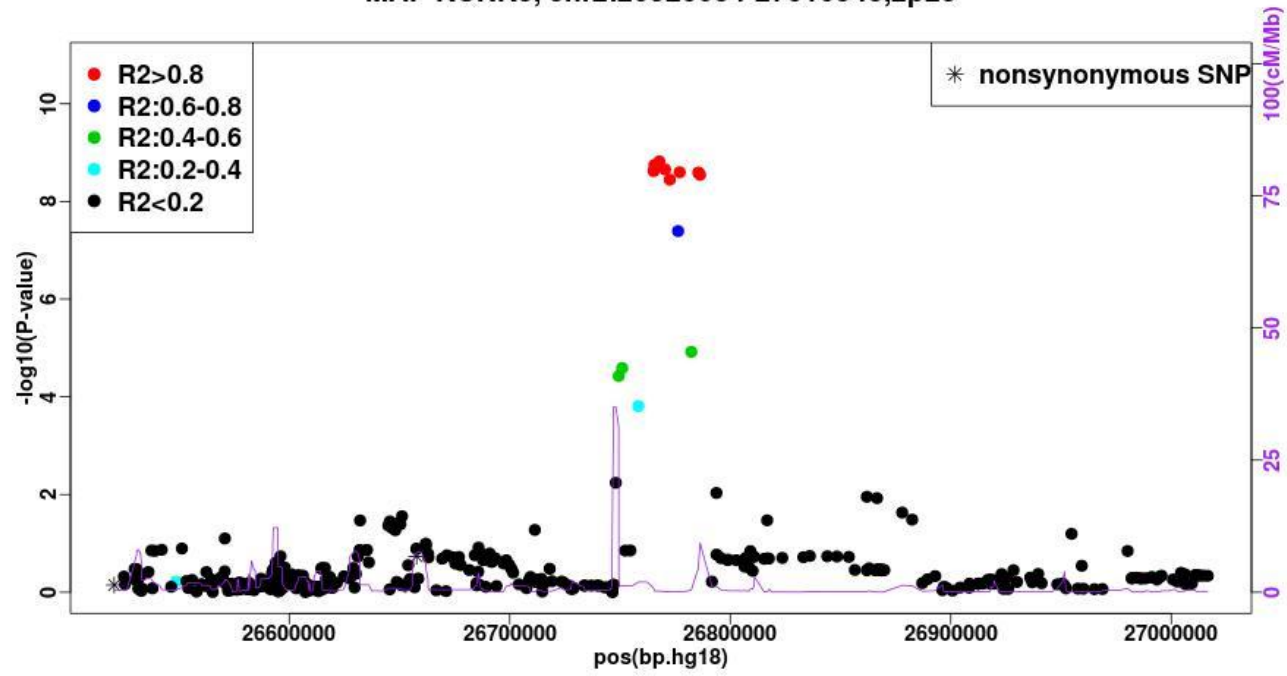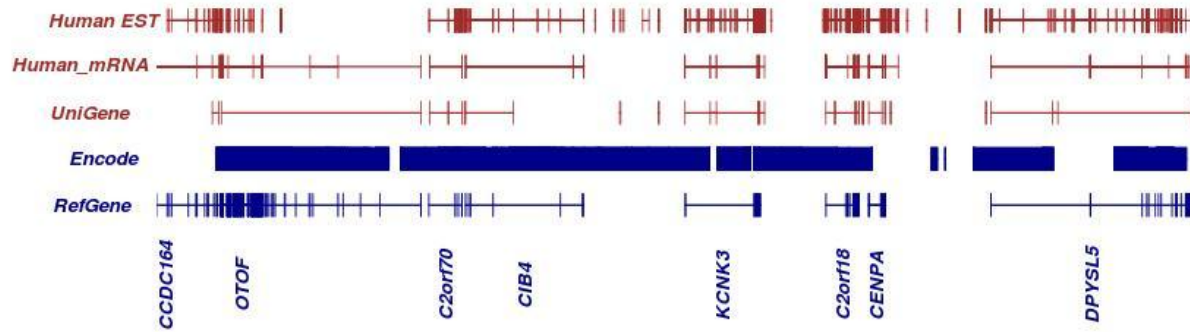

(c)

PP CRIP3, chr6:43139233-43636419,6p21

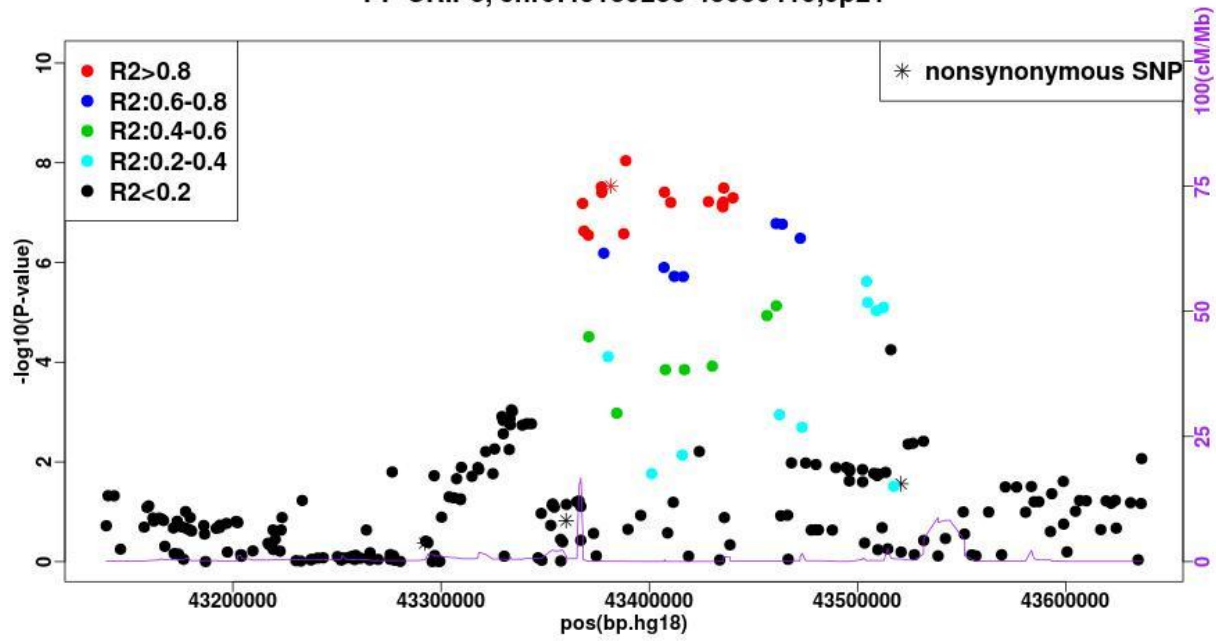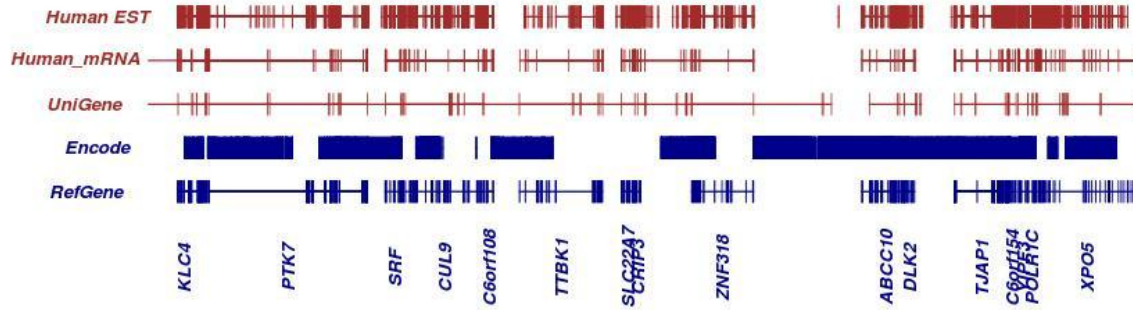

(d)

PP IGFBP3, chr7:45610944-46310846,7p13

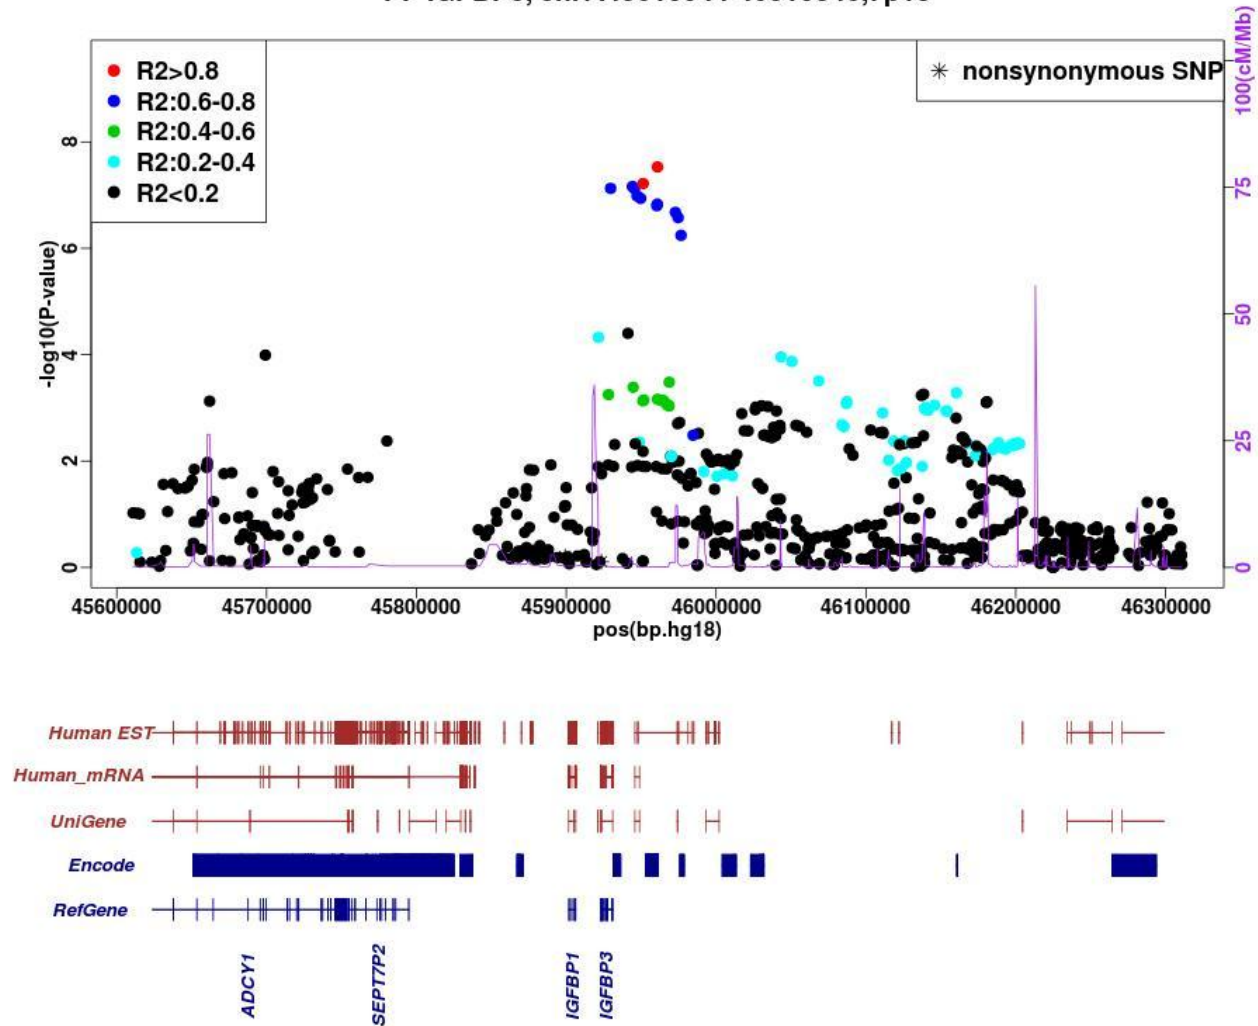



(e)

SBP KCNK3, chr2:26520634-27016548,2p23

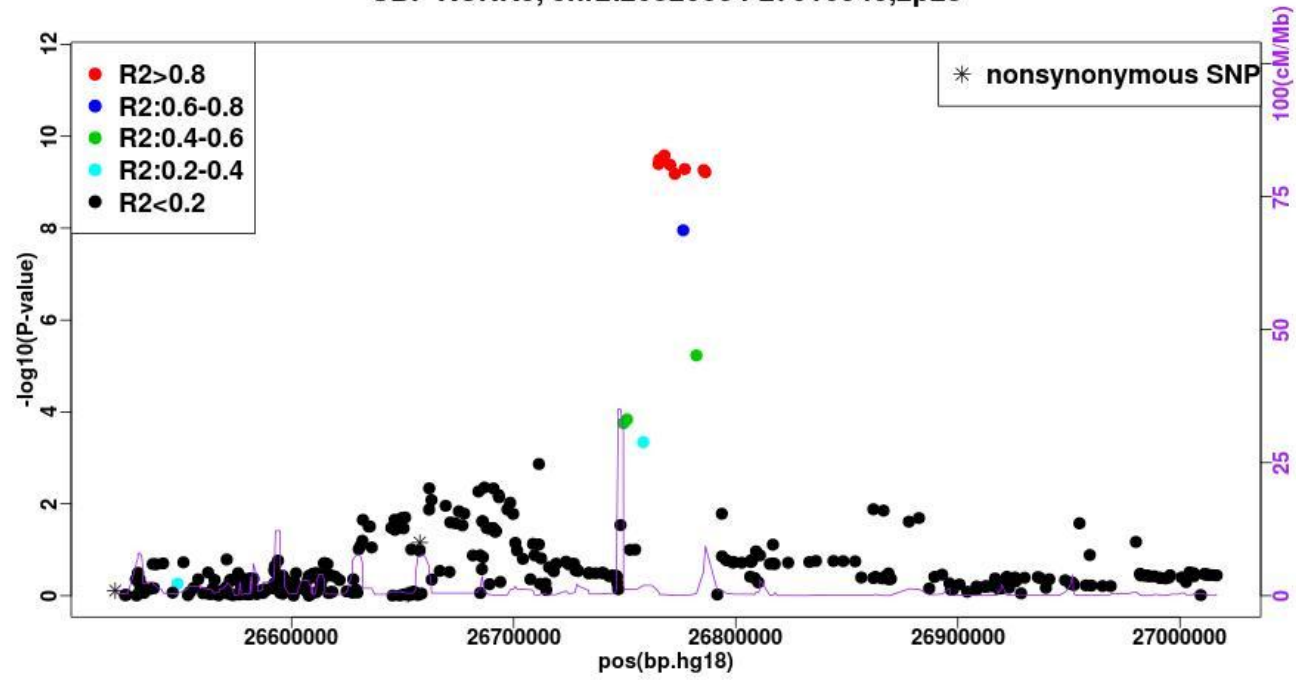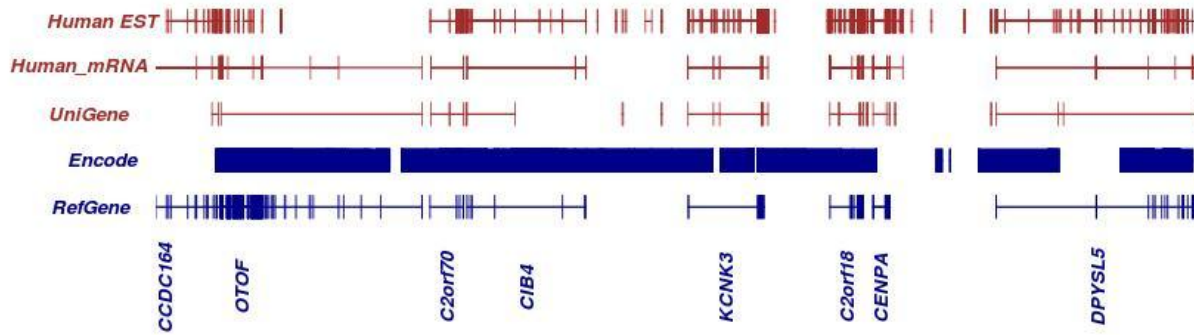

**FIGURE S7.  $-\log P$  value plots for regions identified in the LTA analysis.**

$-\log P$  values of association tests are shown for all regions identified in the LTA analyses for (a) regions with enrichment in the LTA analysis compared to the corresponding V1 analyses (rank test  $P$  value  $< 0.001$ ), (b) regions with enrichment in the V1 analysis compared to the corresponding LTA analyses (rank test  $P$  value  $< 0.001$ ), (c) one region with enrichment of some SNP by LTA and other SNPs by V1 ( $P$  Value  $< 0.001$ ) and (d) regions without enrichment by either LTA or V1 within the locus. The results of the LTA-SBP analysis are plotted in black and the results of the corresponding V1-SBP analysis of the same individuals are plotted in blue.



(a1)

# SBP, MTHFR, 1p36

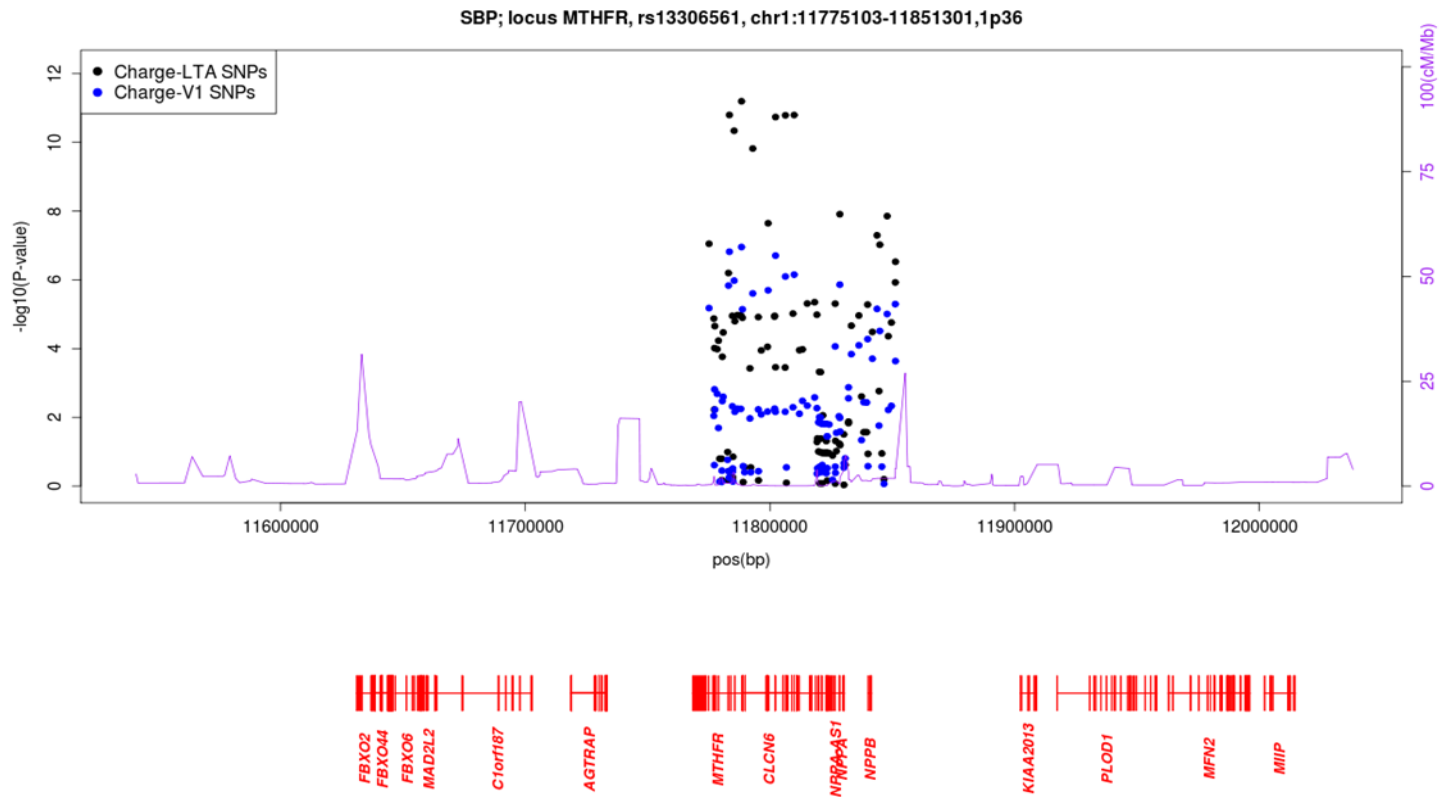

(a2)

# SBP, KCNK3, 2p23

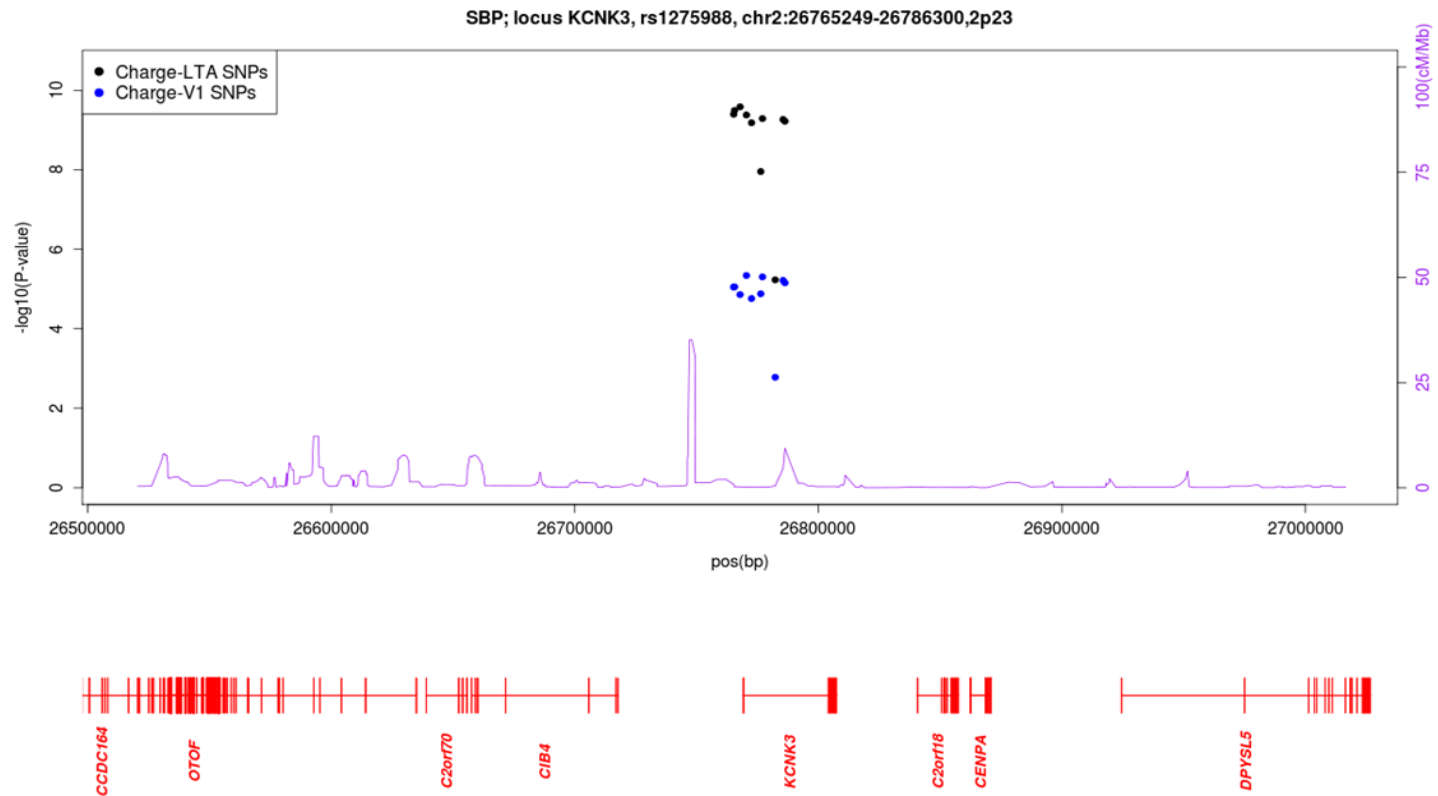

(a3)

# SBP, GRB14, 2q24

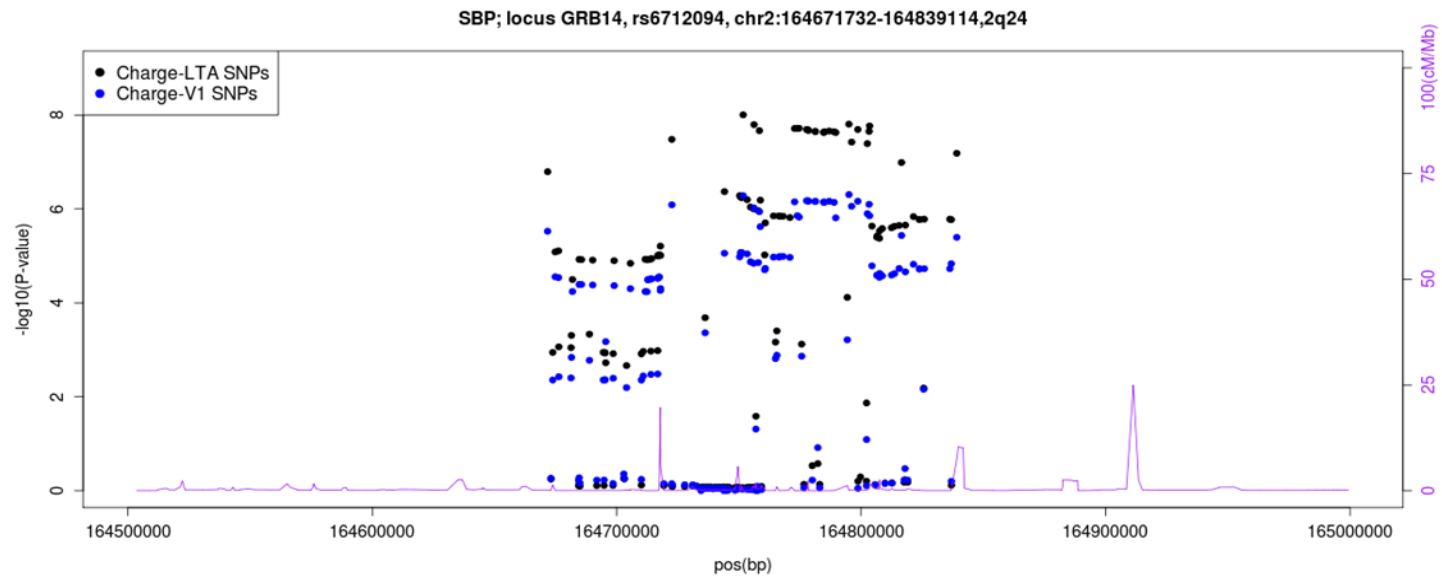

(a4)

# SBP, C5orf23,5p13

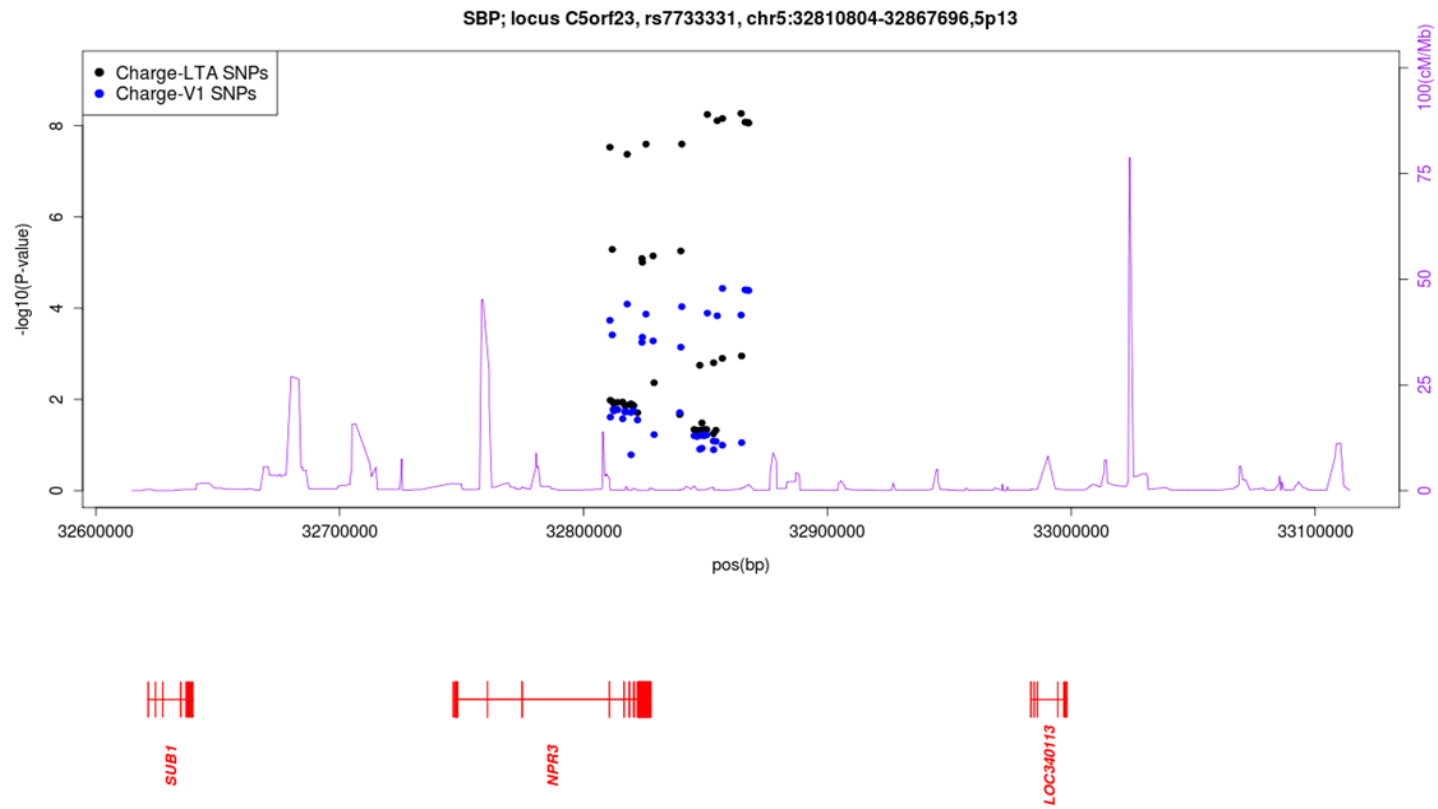

(a5)

# SBP, PIK3CG,7q22

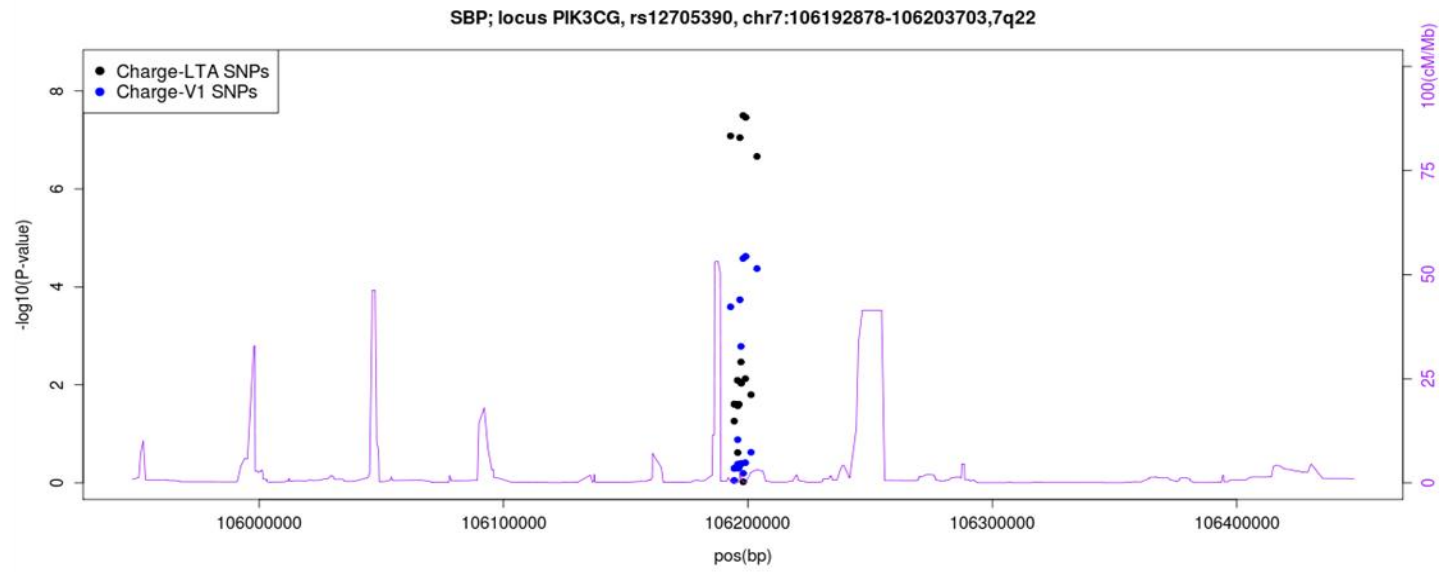

*C7orf74*

*PIK3CG*

(a6)

# SBP, PIK3CG,7q22

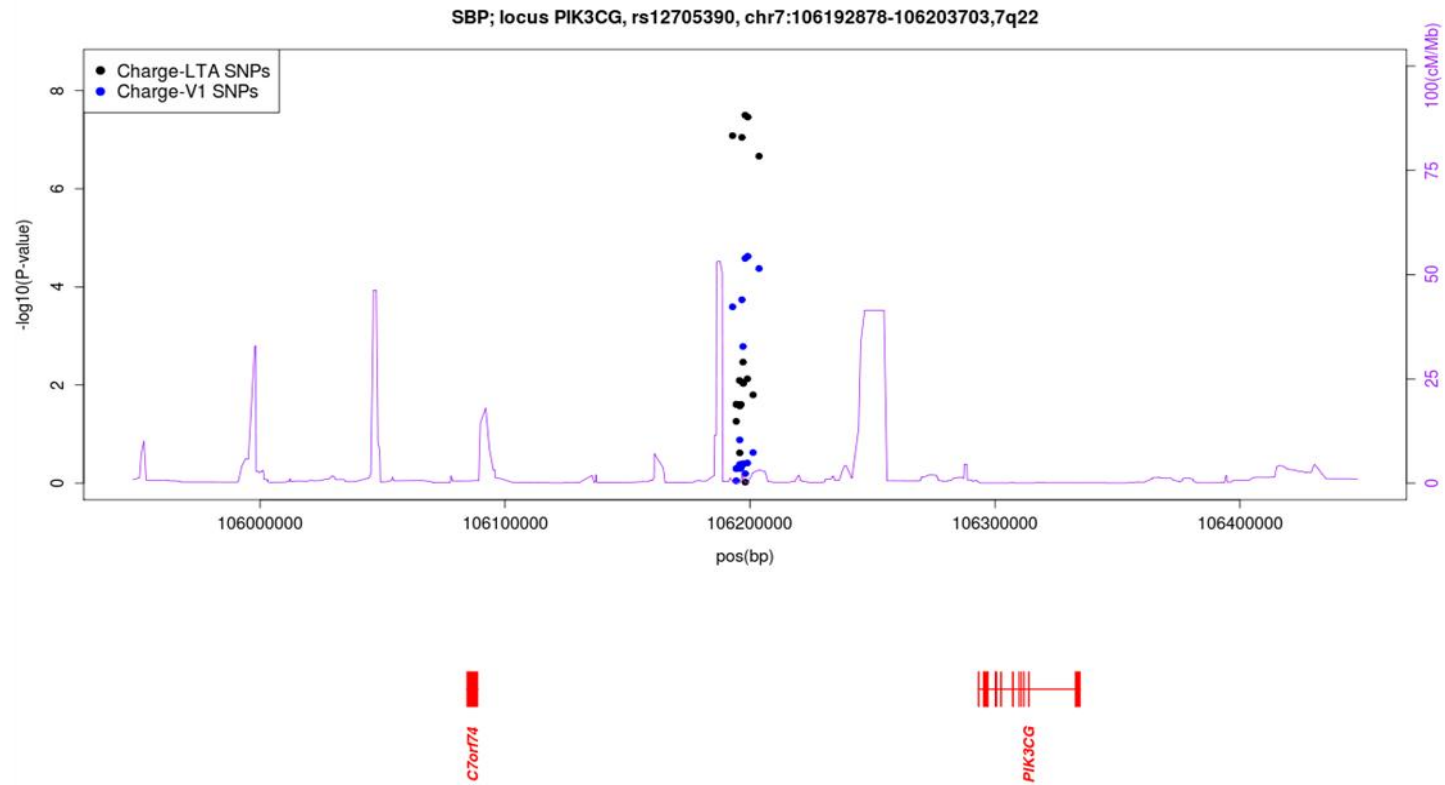

(a7)

# SBP, PIK3CG,7q22

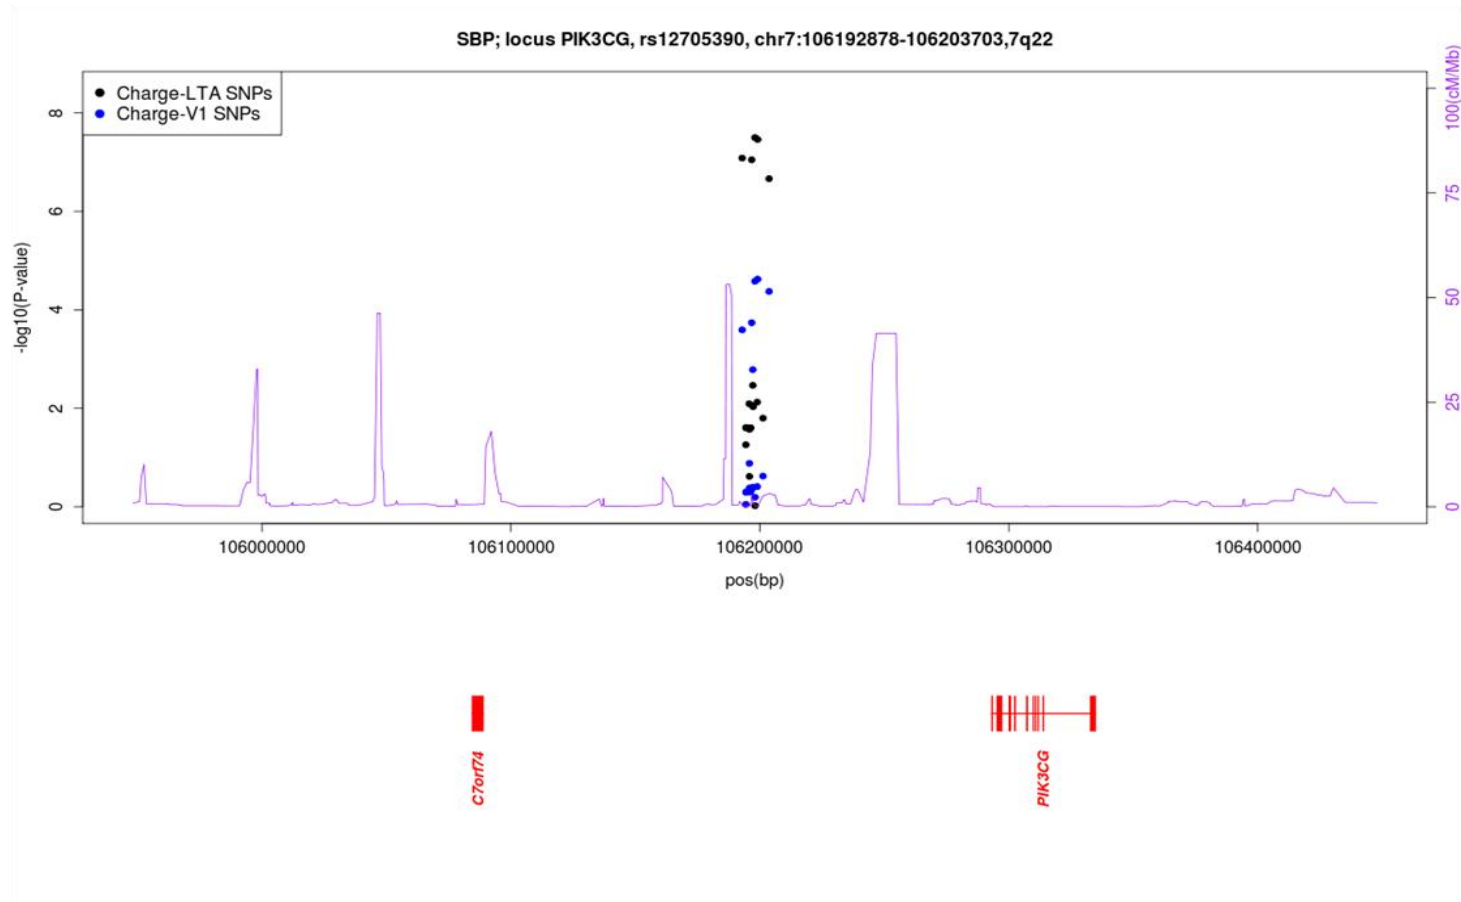

(a8)

# SBP, C10orf107, 10q21

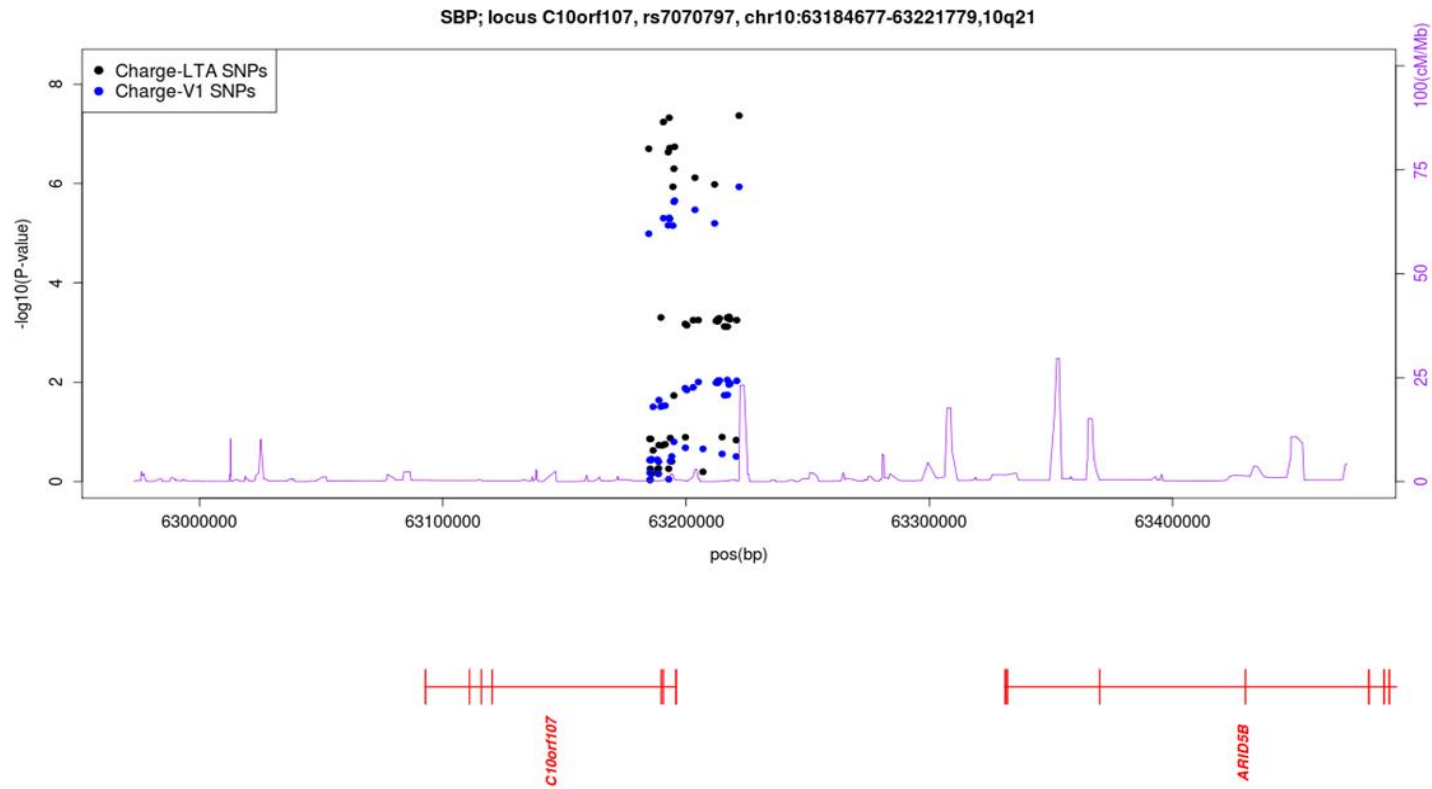



(a9)

# SBP, C10orf107, 10q21

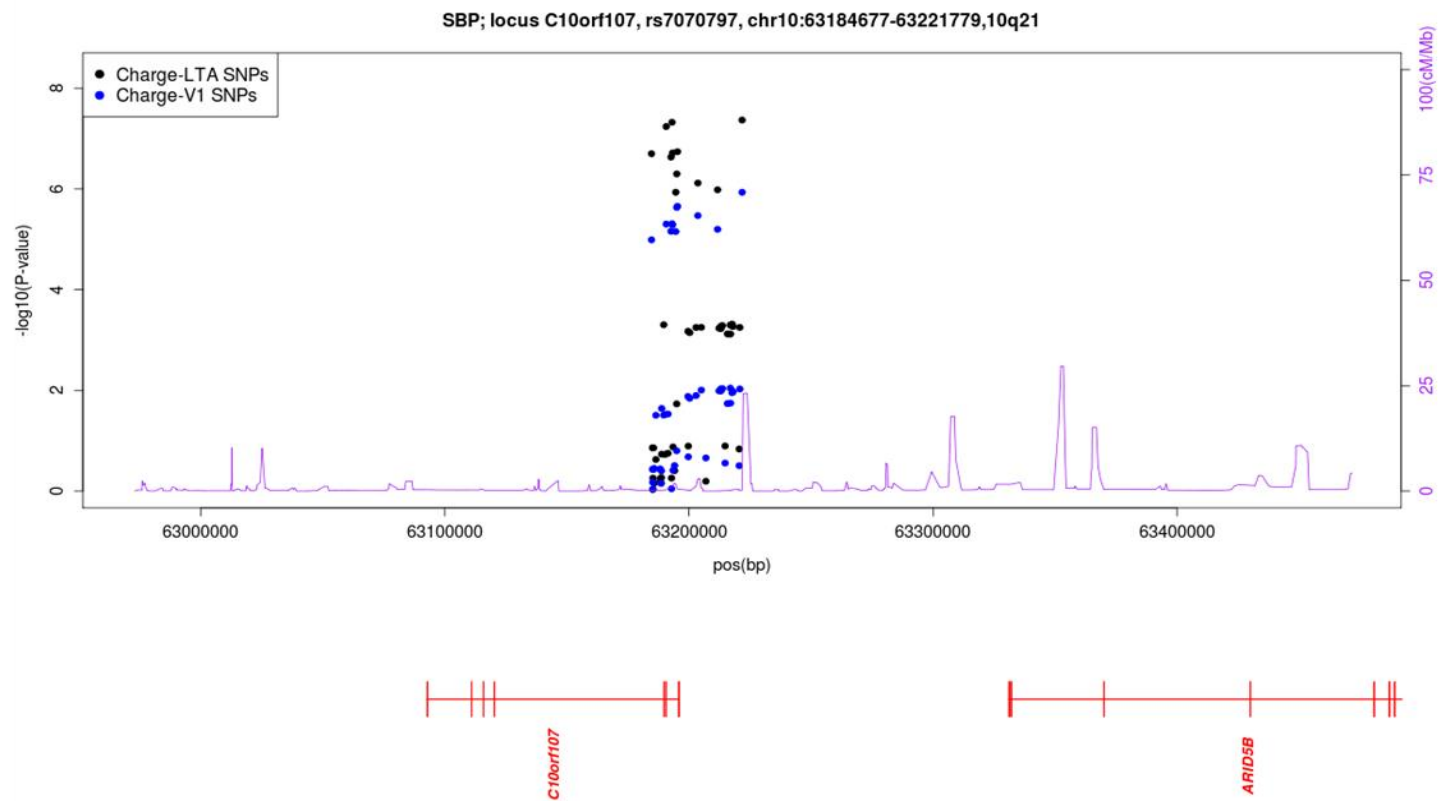

(a10)

# DBP, MTHFR, 1p36

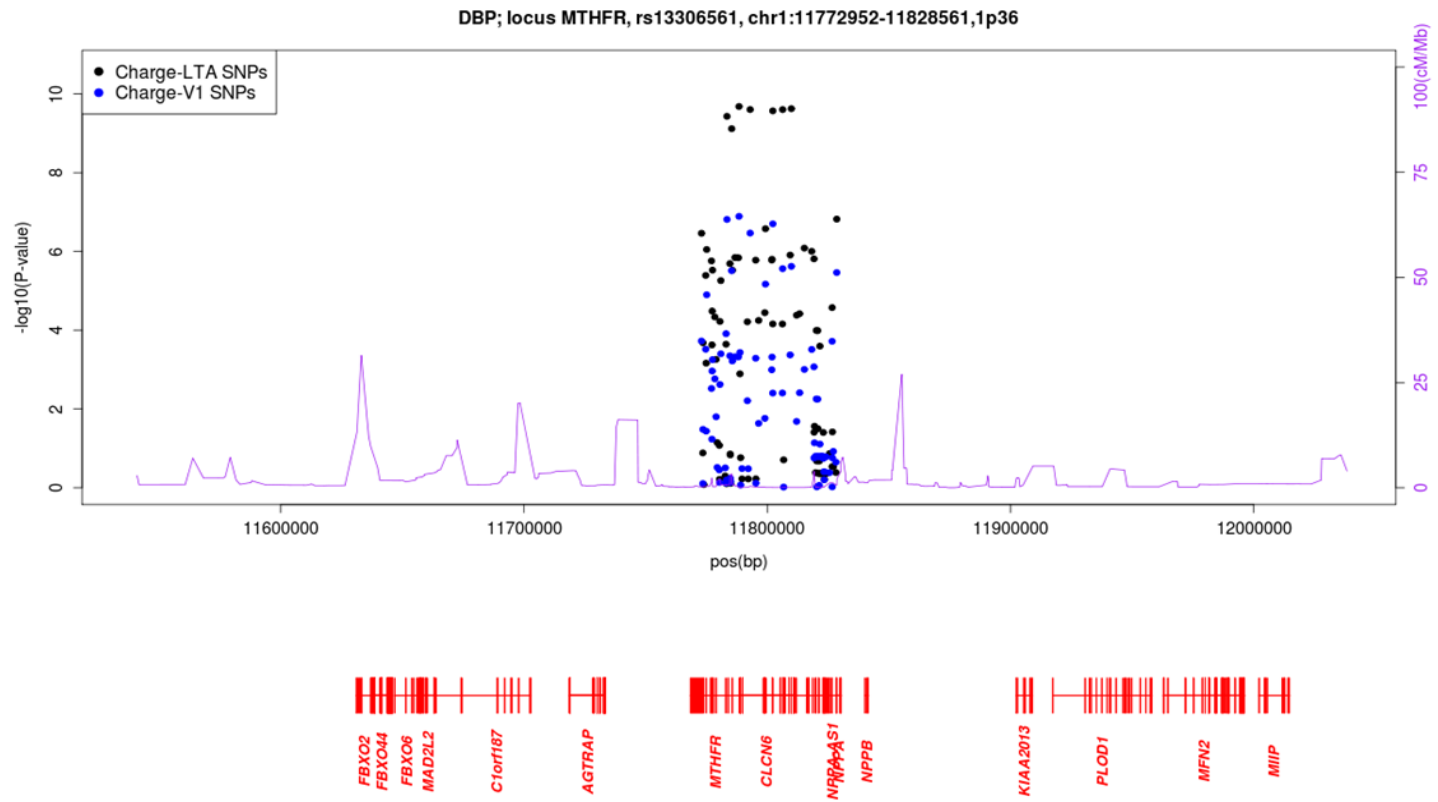

(a11)

# DBP,EBF1,5q33

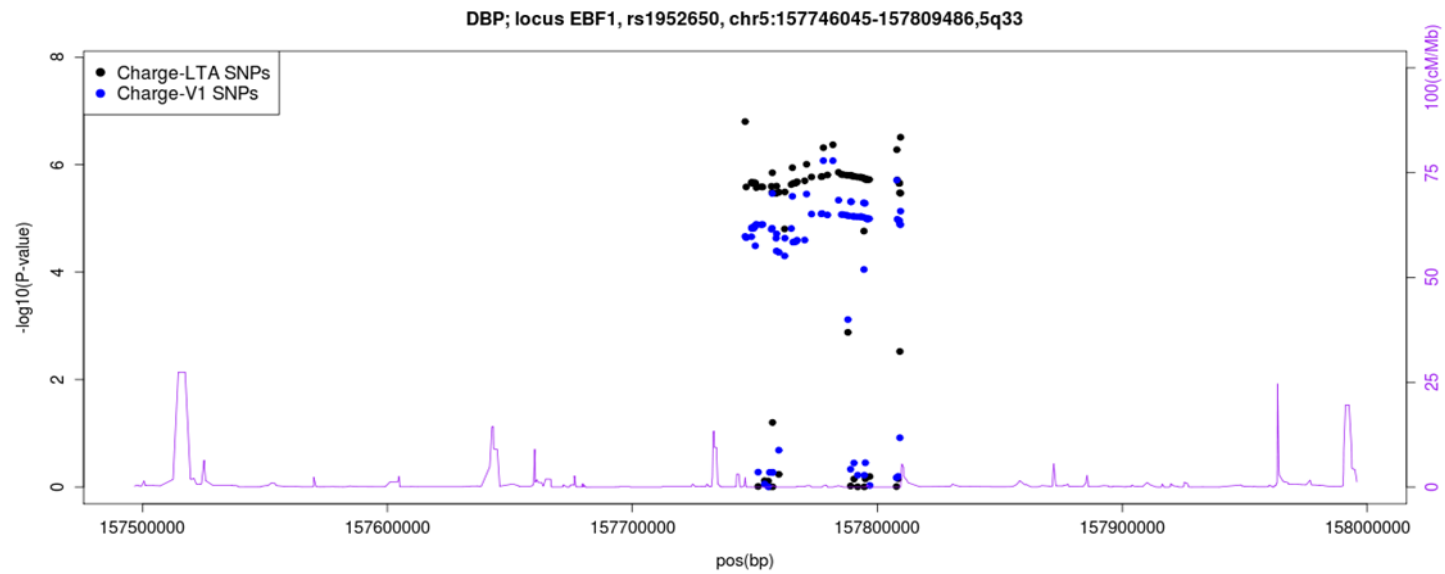

(a12)

# DBP, HIST1H2BC,6p22

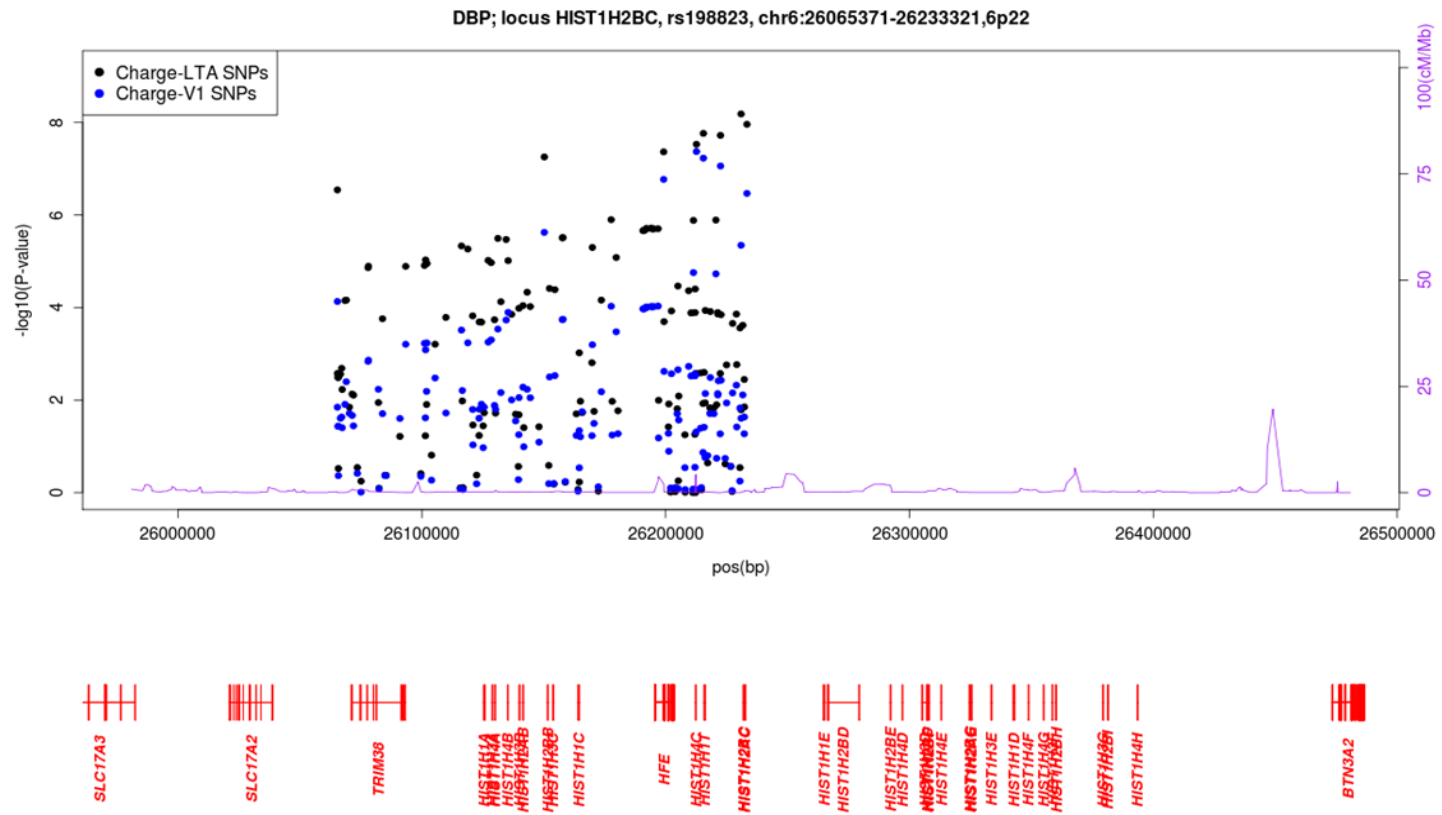

(a13)

# DBP, C10orf107

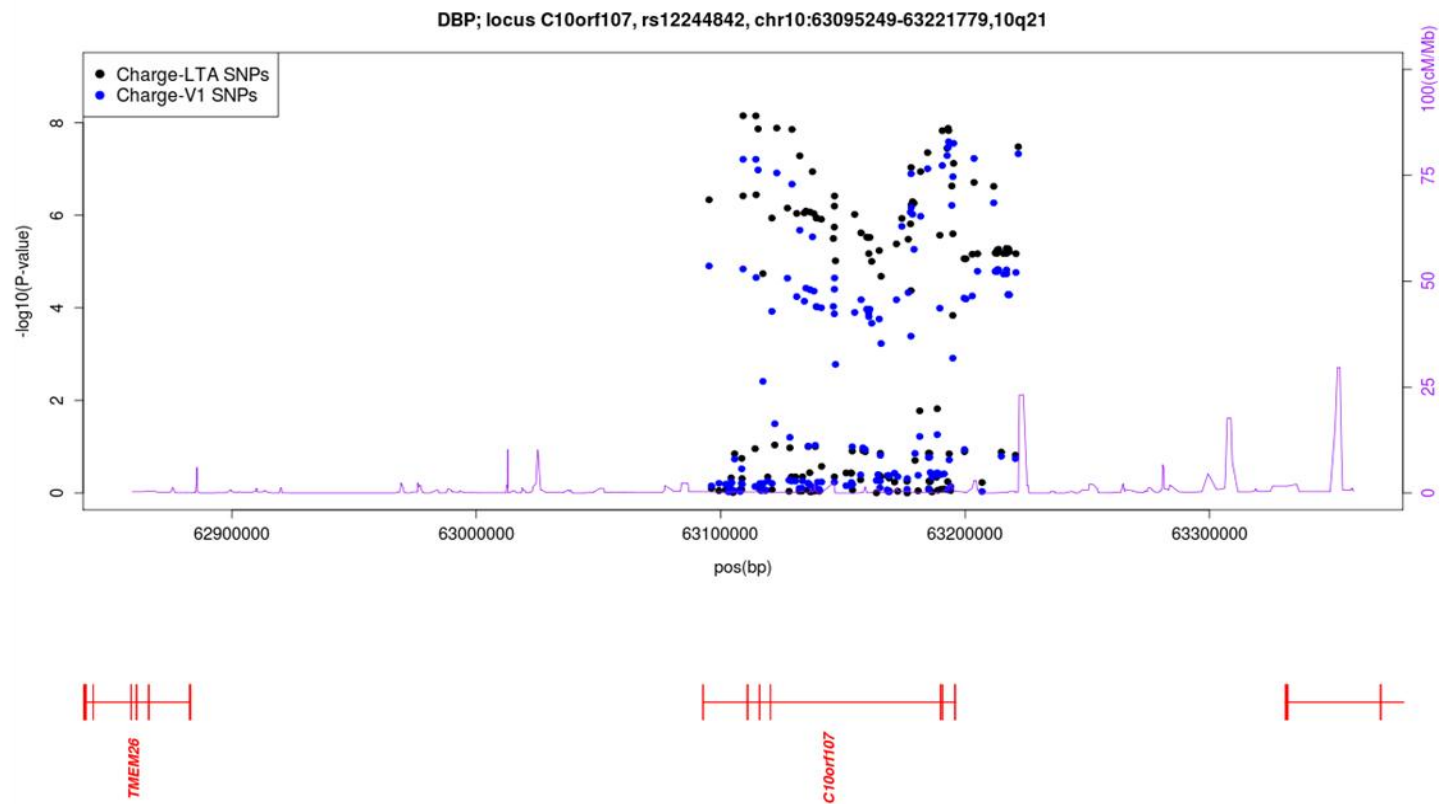

(a14)

# DBP, SH2B3, 12q24

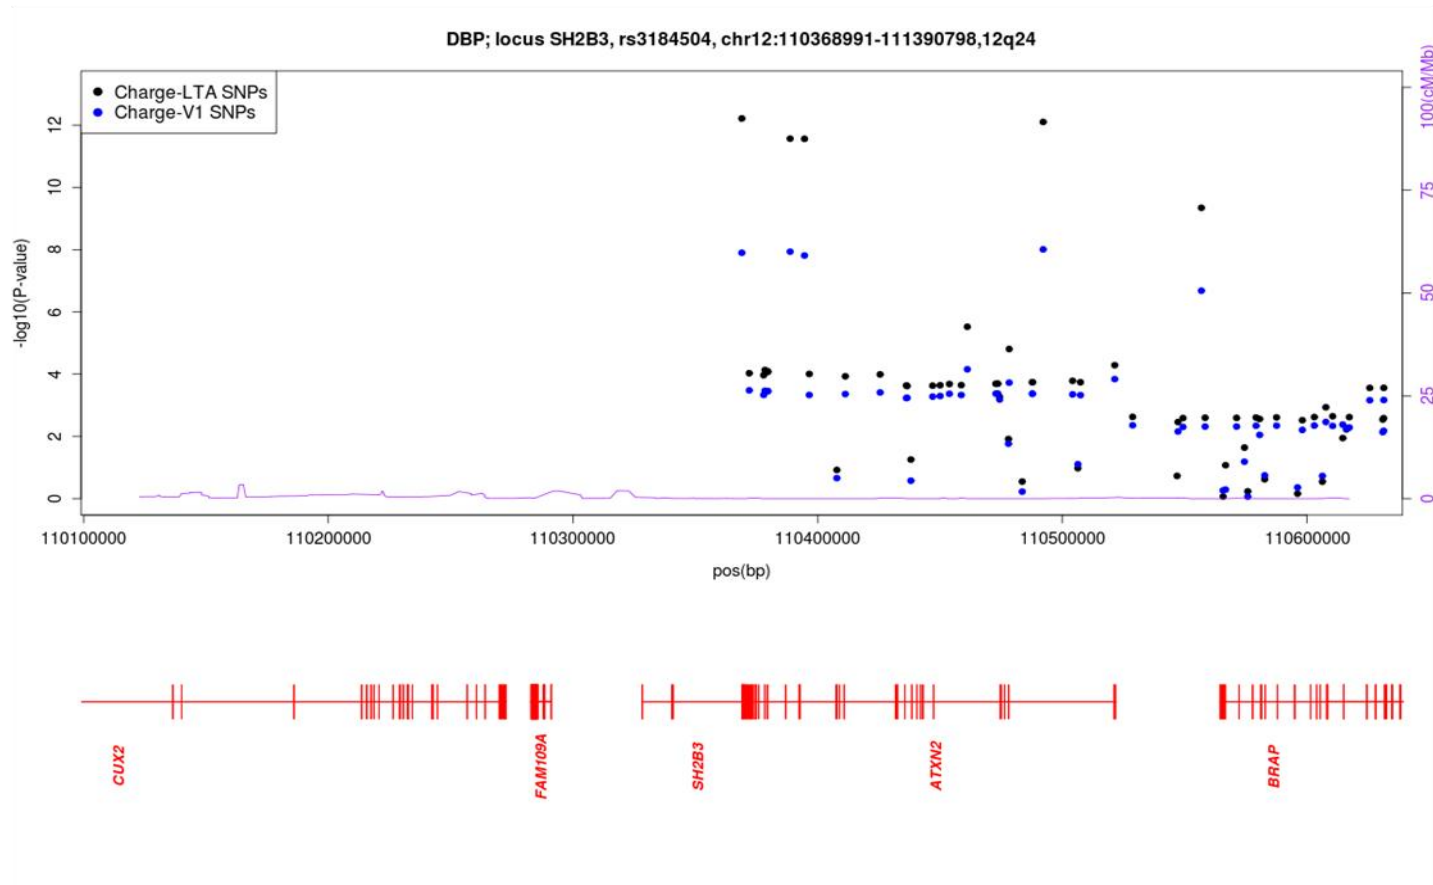

(a15)

# MAP, MTHFR, 1p36

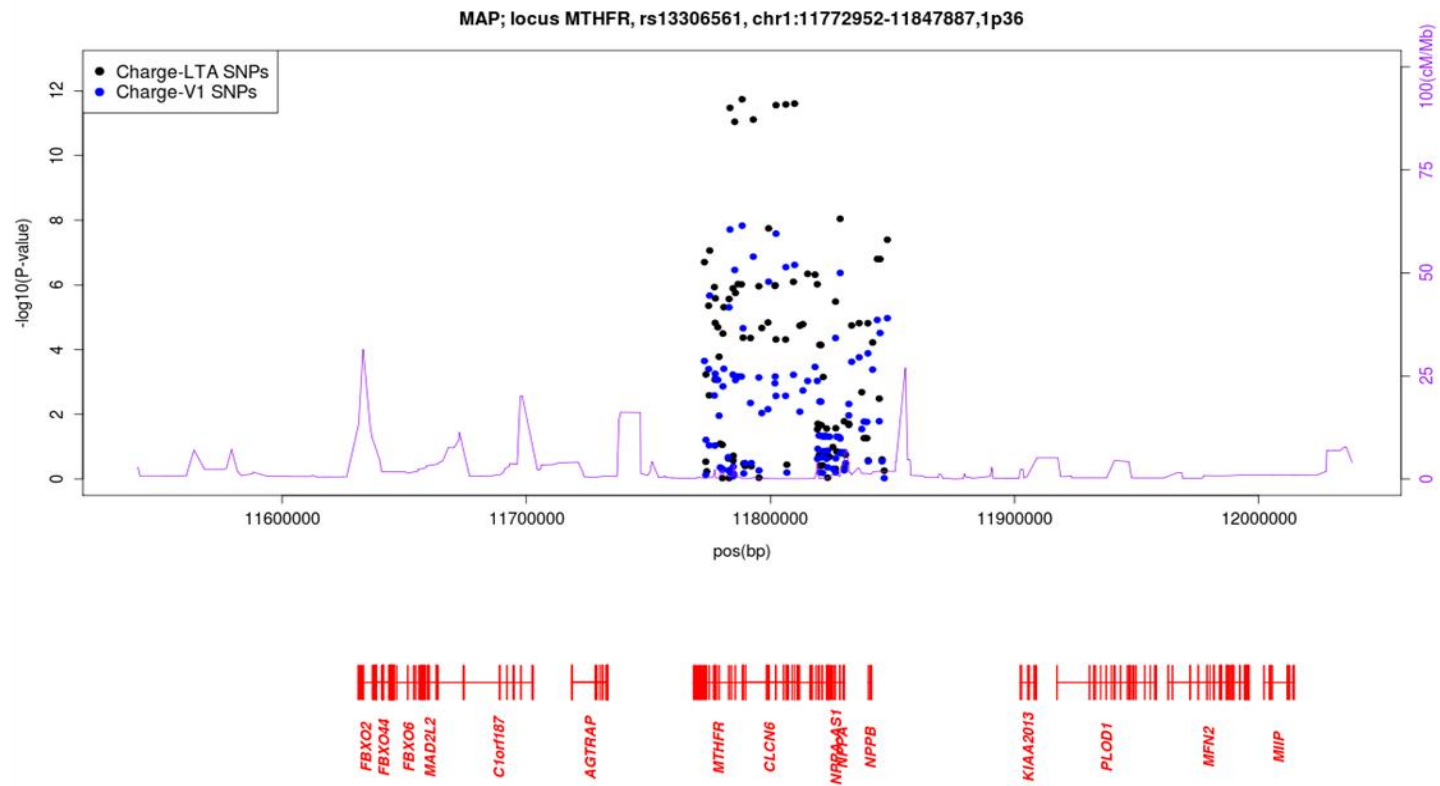

(a16)

# MAP, KCNK3, 2p23

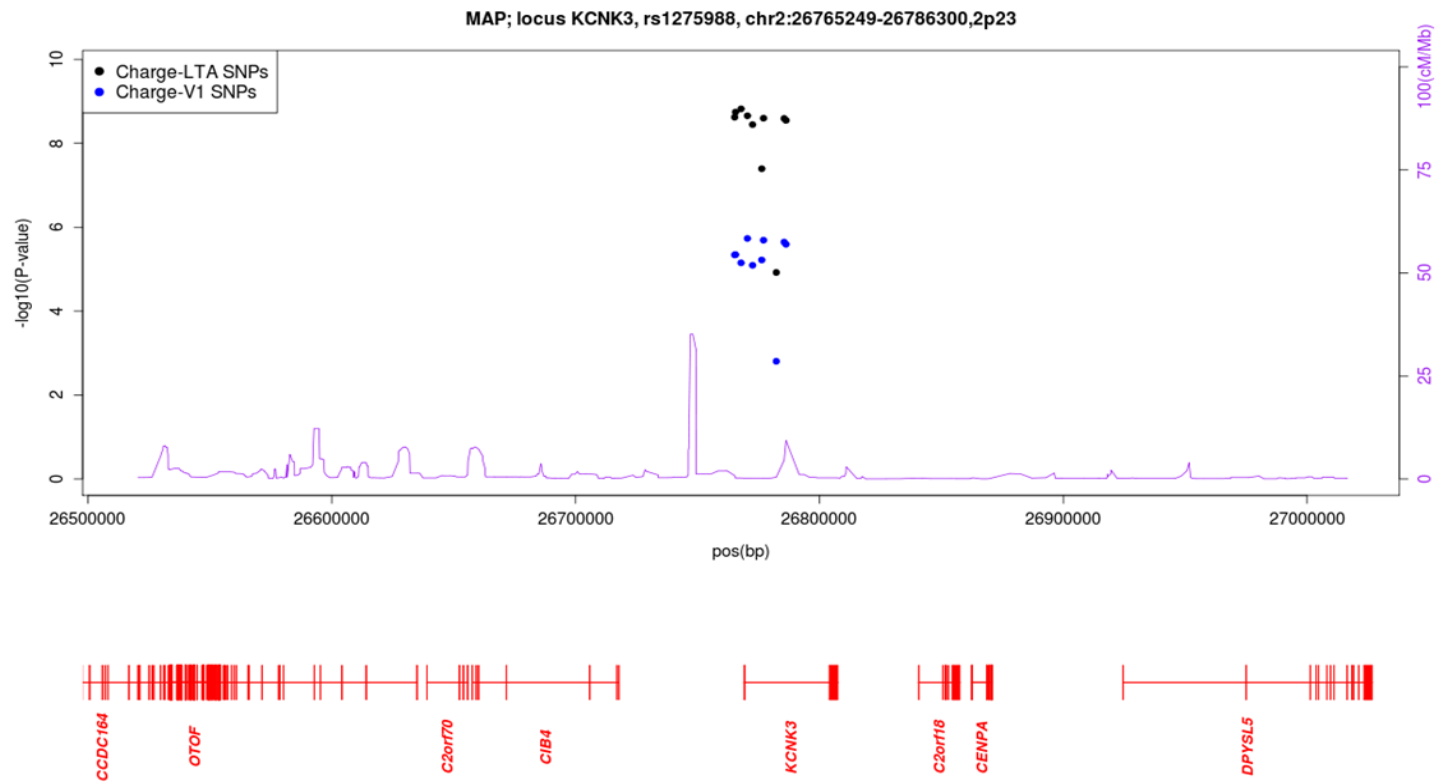



(a17)

# MAP, C10orf107, 10q21

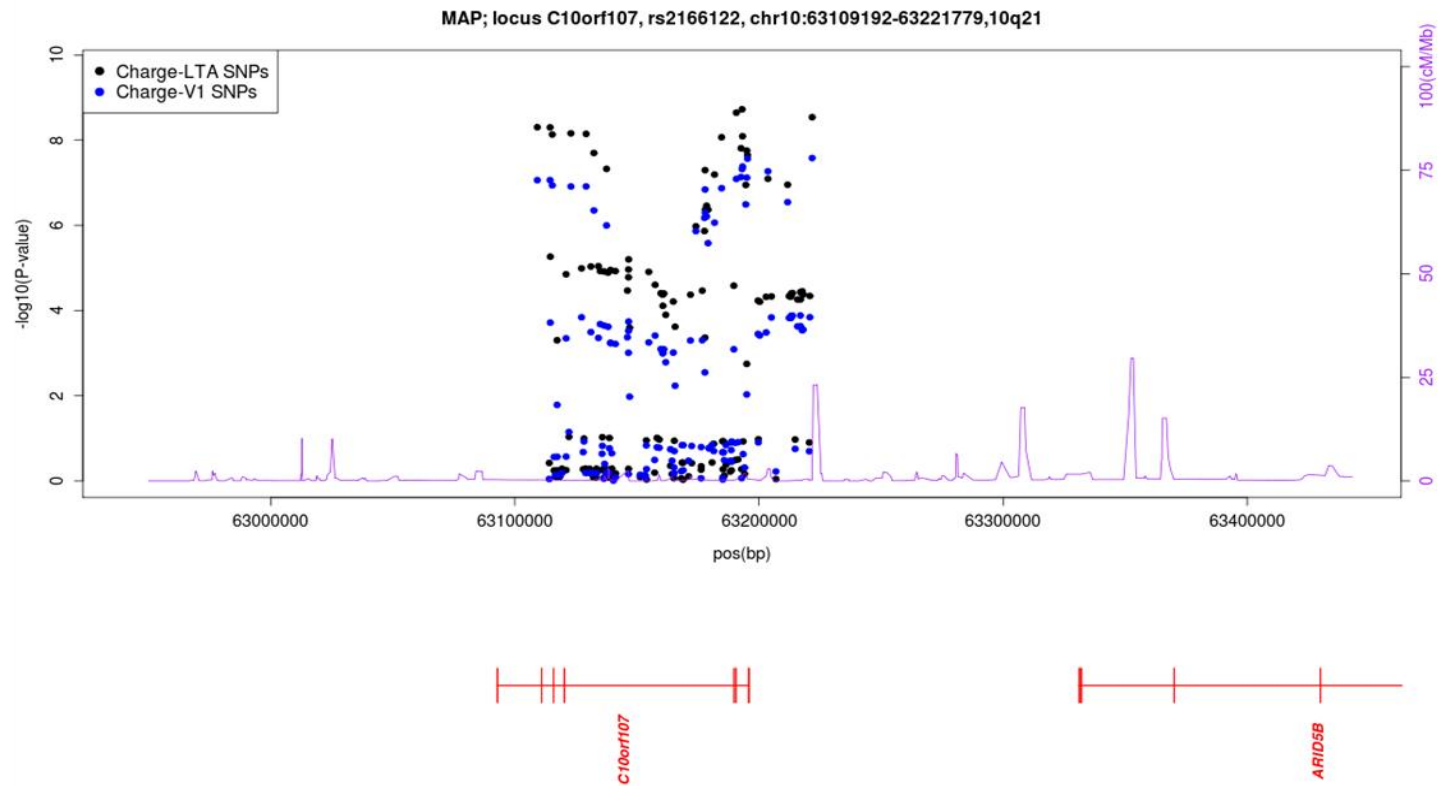

(a18)

# MAP, ATP2B1, 12q21

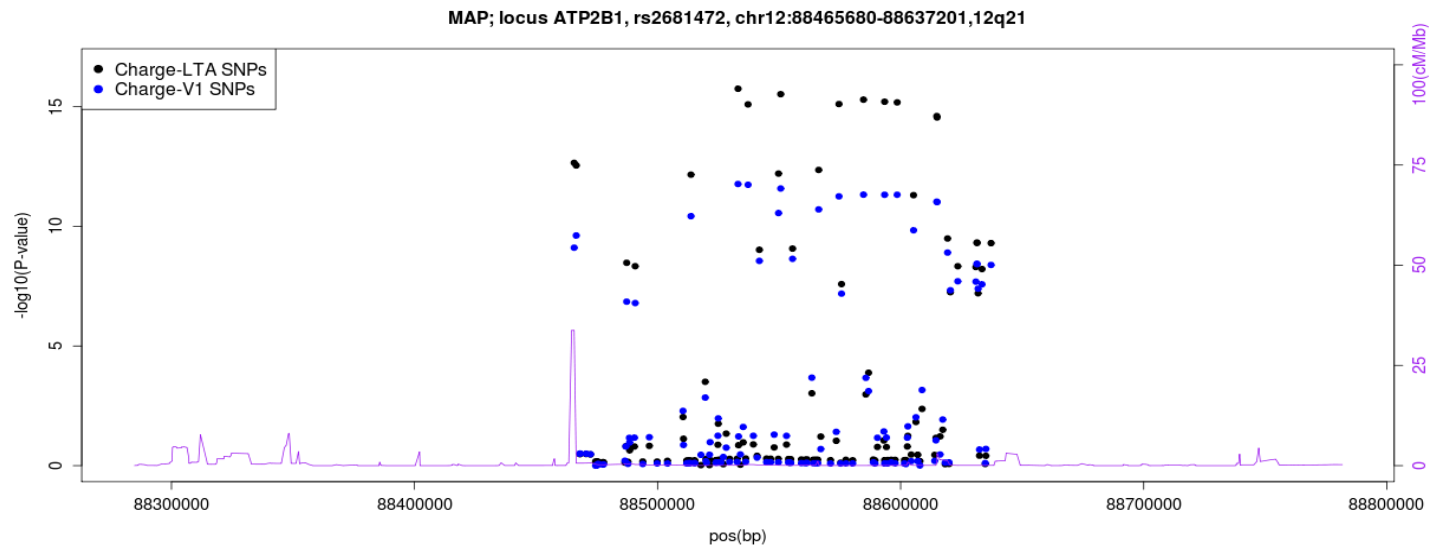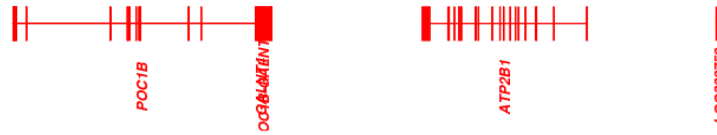

(a19)

# PP, CRIP3,6p21

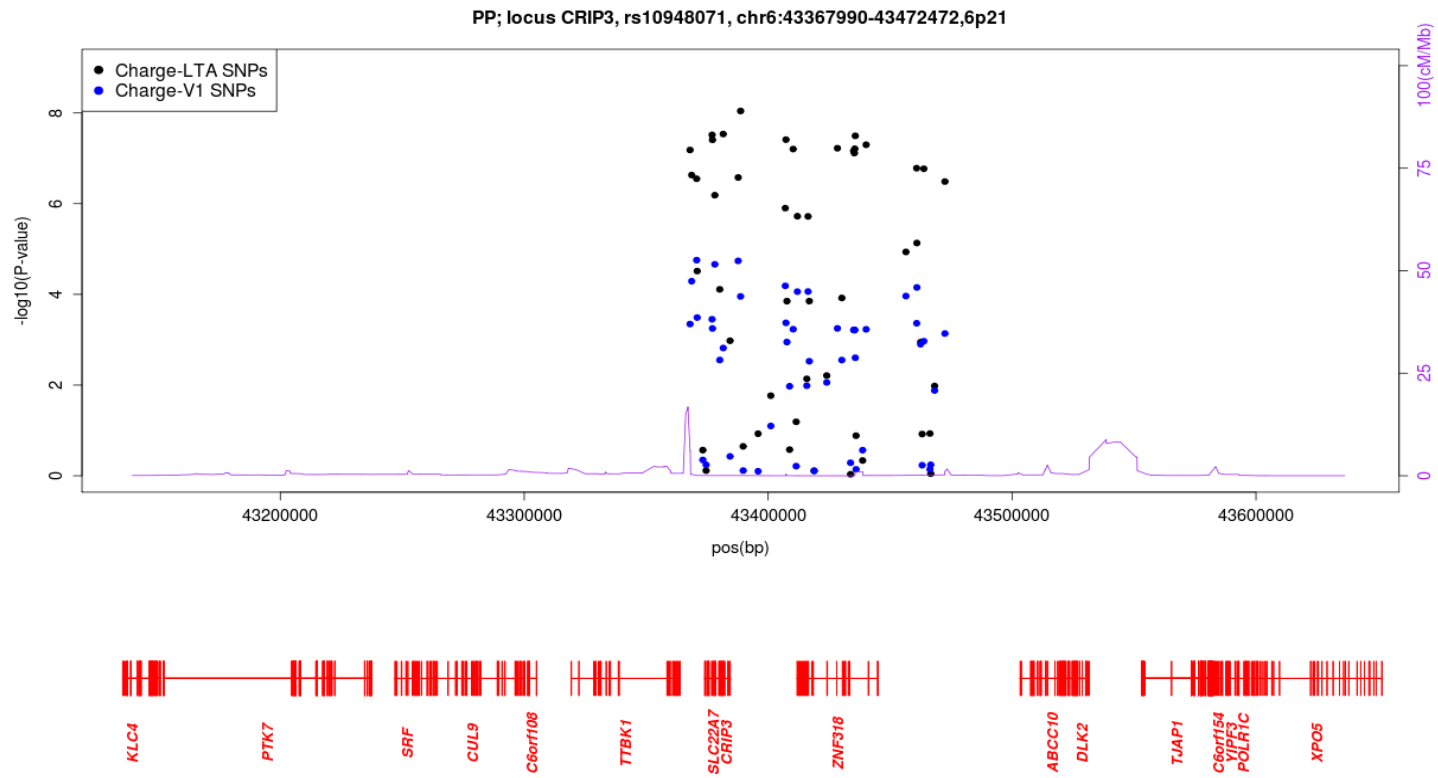

(a20)

# PP, IGFBP3,7p13

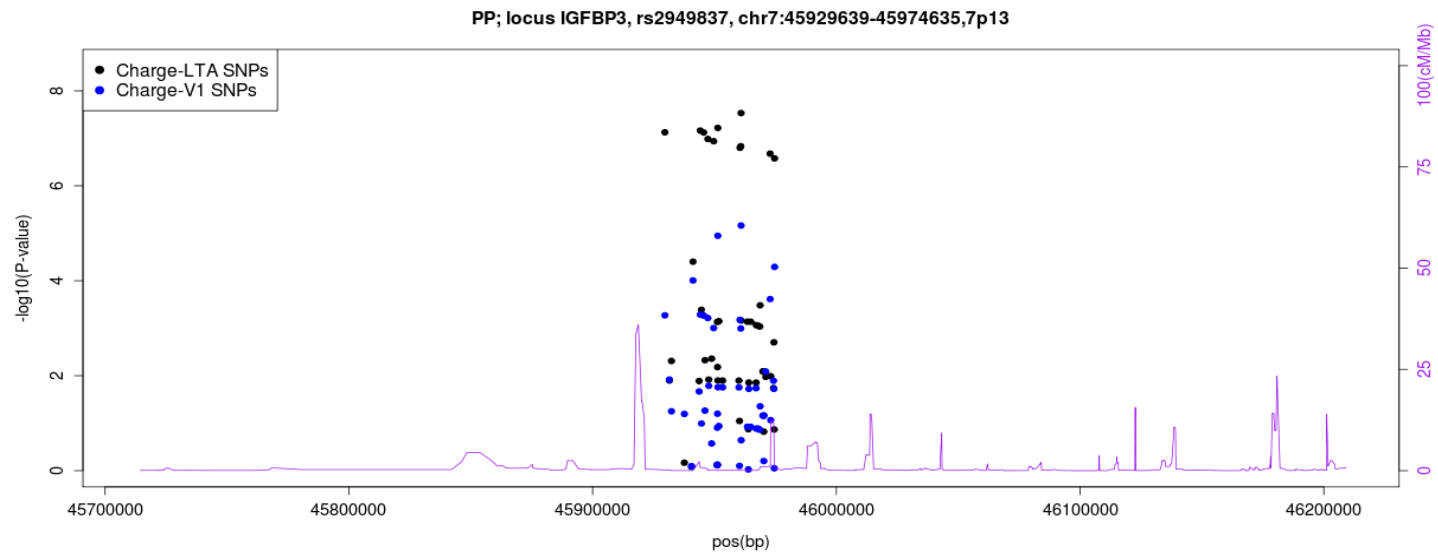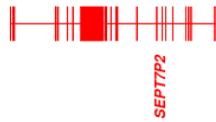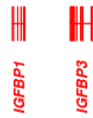

(a21)

# PP, IGFBP3, 7p13

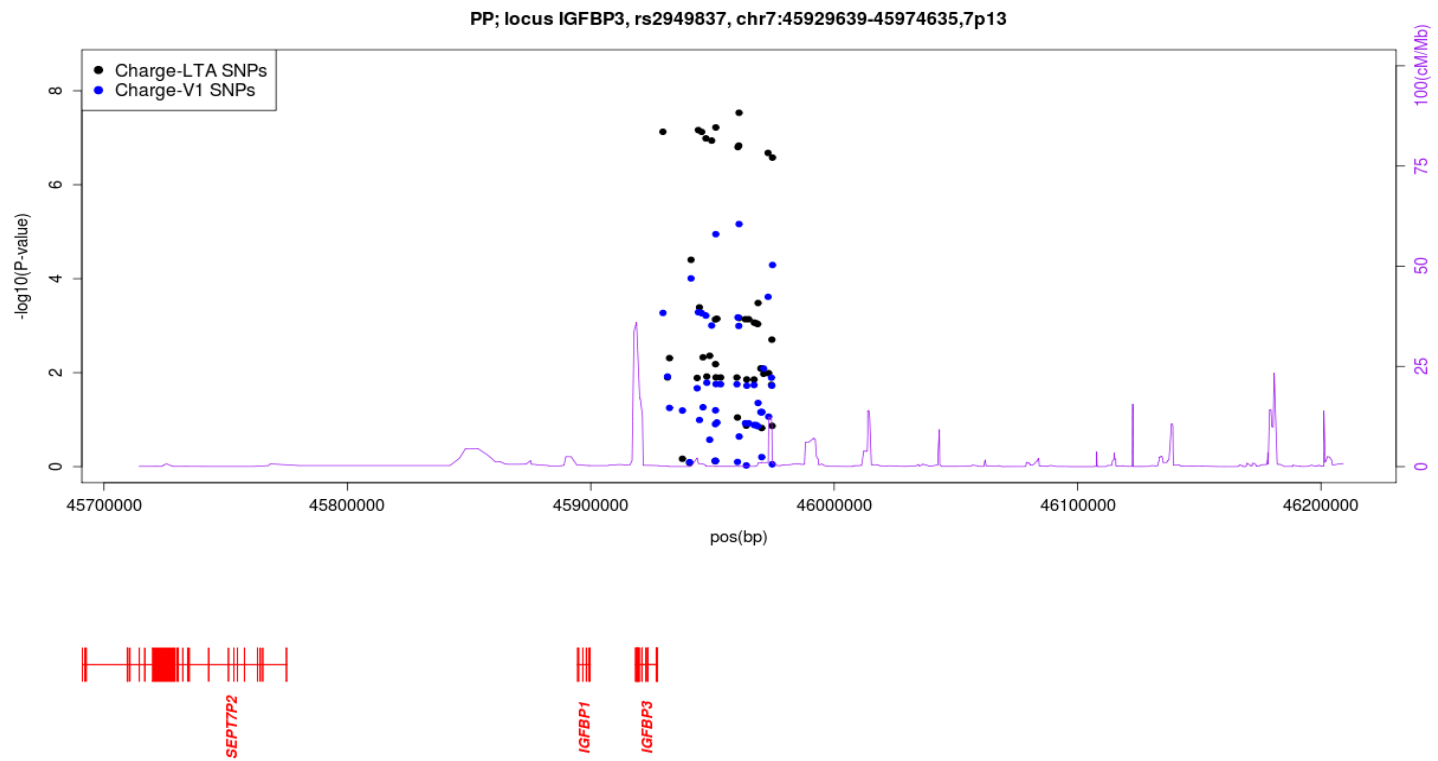

(b1)

# SBP,AGT,1q42

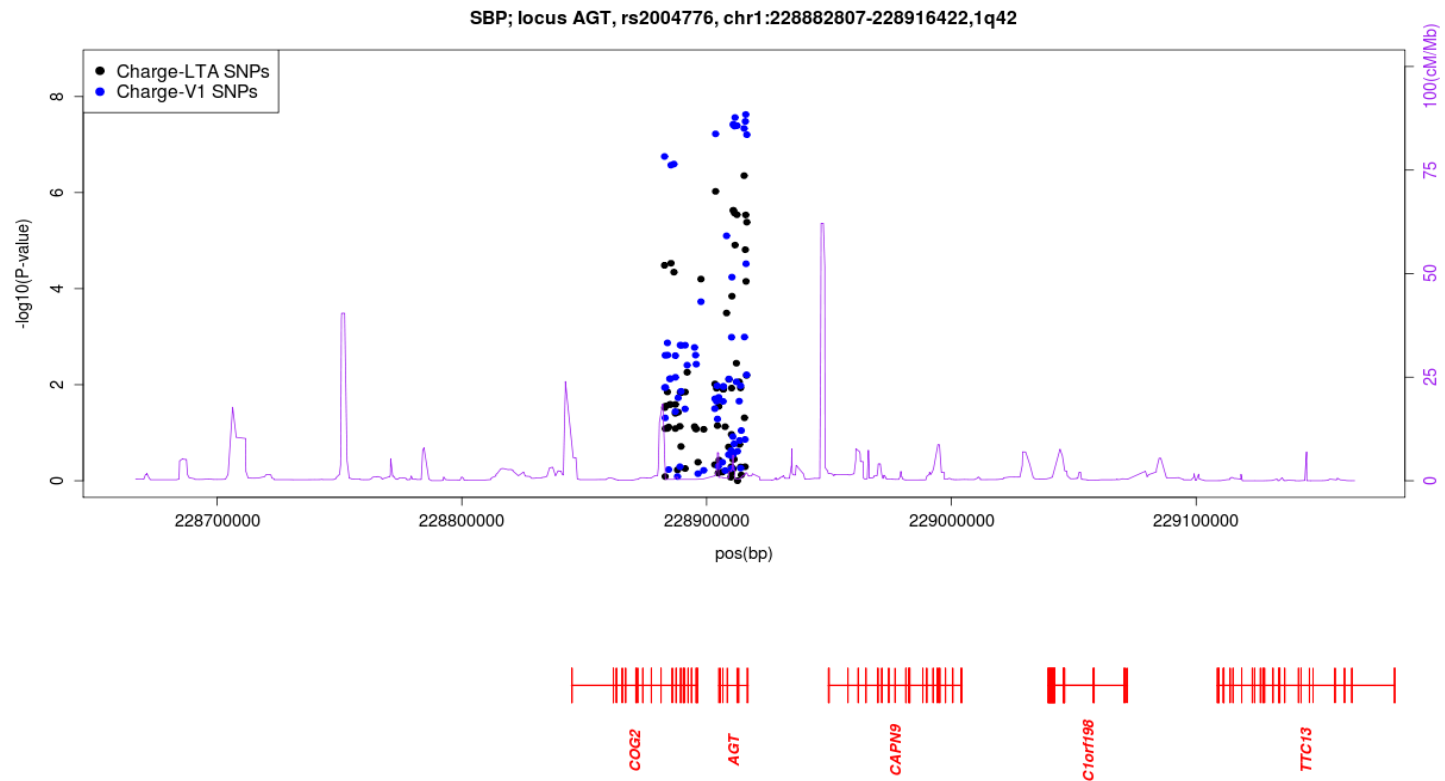

(b2)

# SBP, ATXN2, 12q24

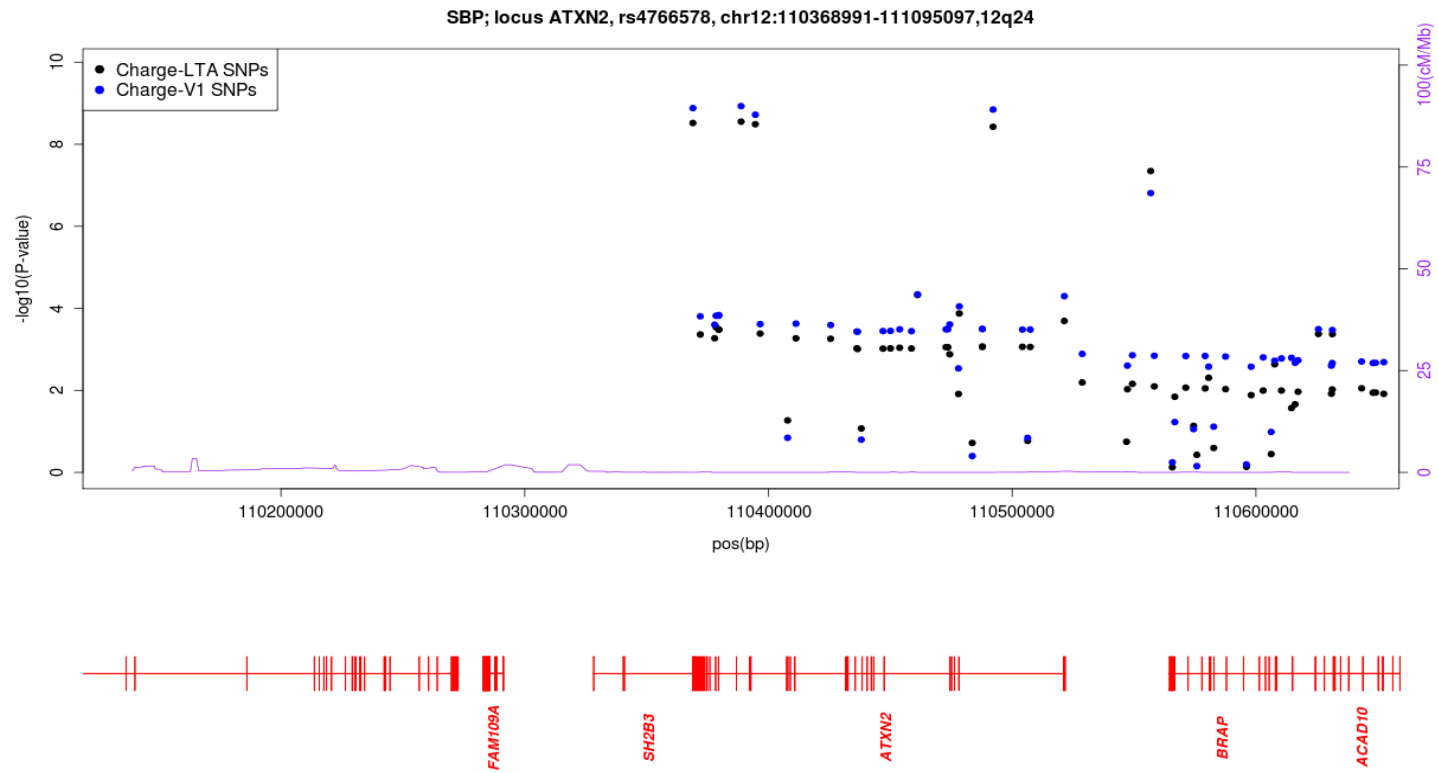

(b3)

# SBP, COX5A, 15q24

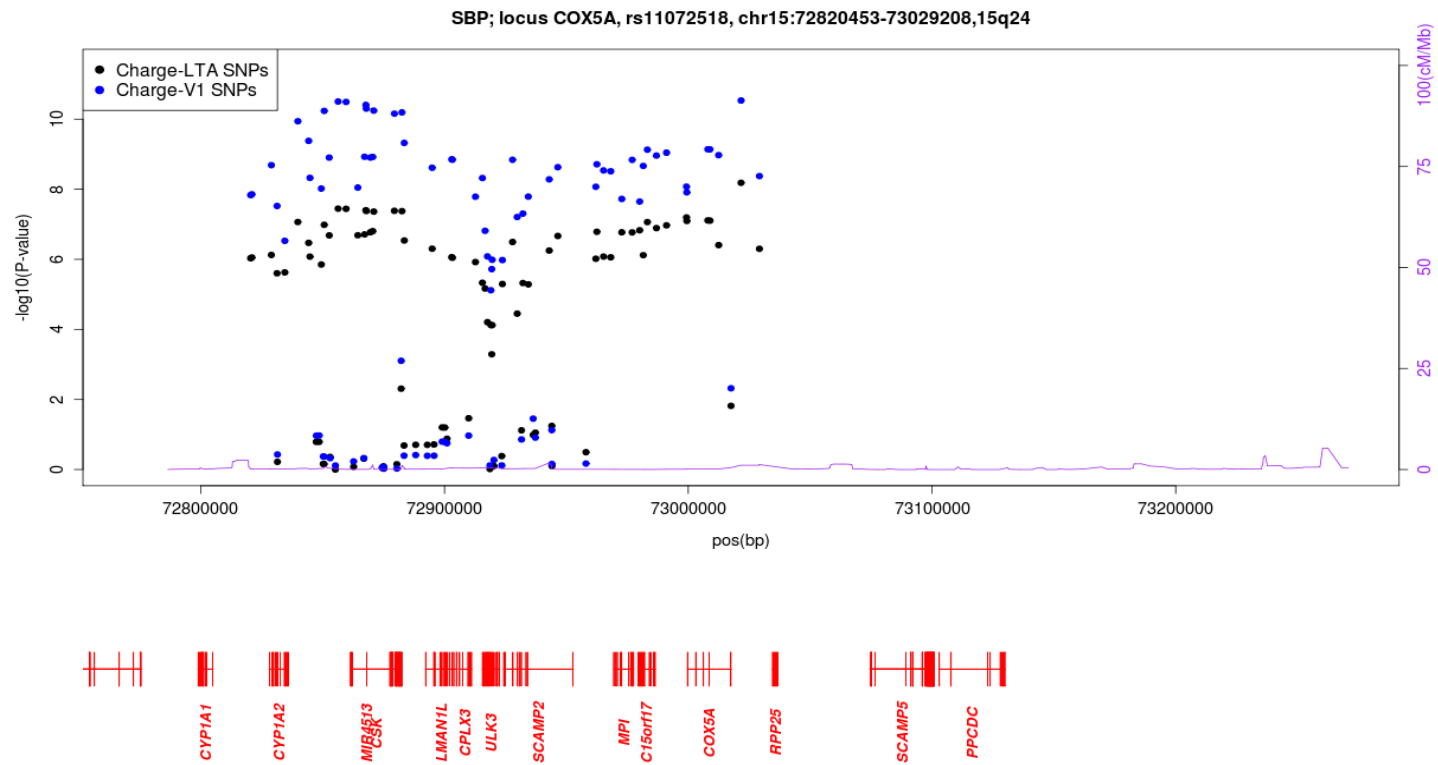



(b4)

# SBP, C20orf174, 20q13

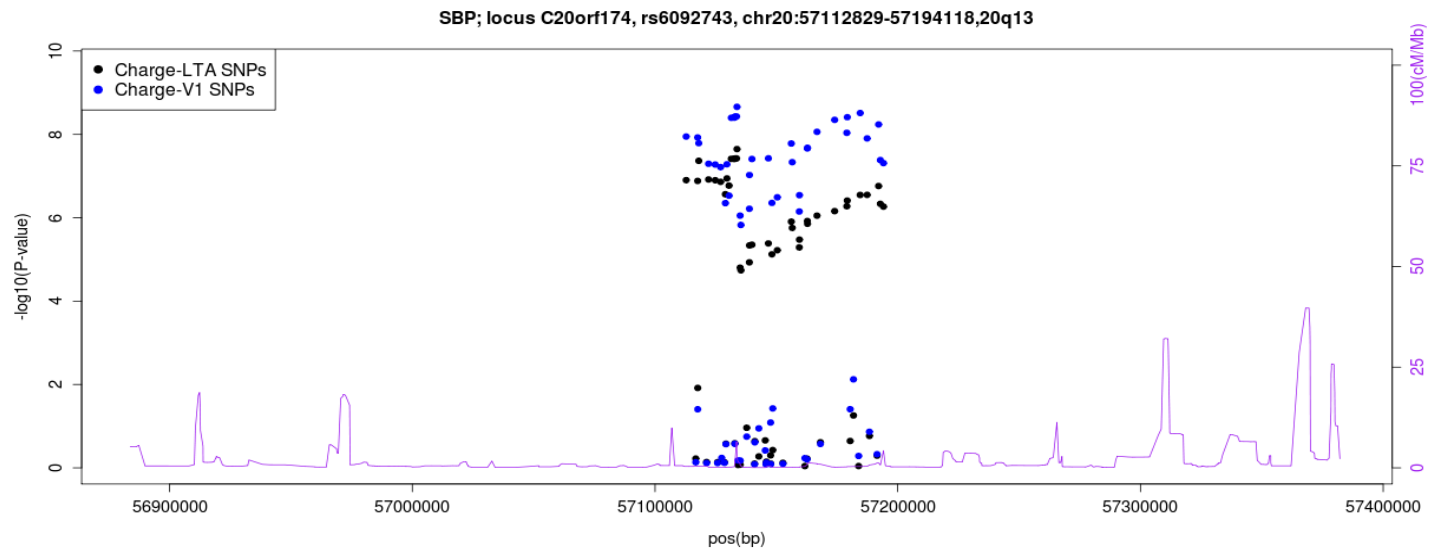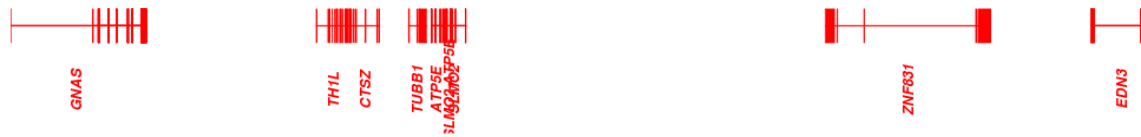

(b5)

# DBP, COX5A, 15q24

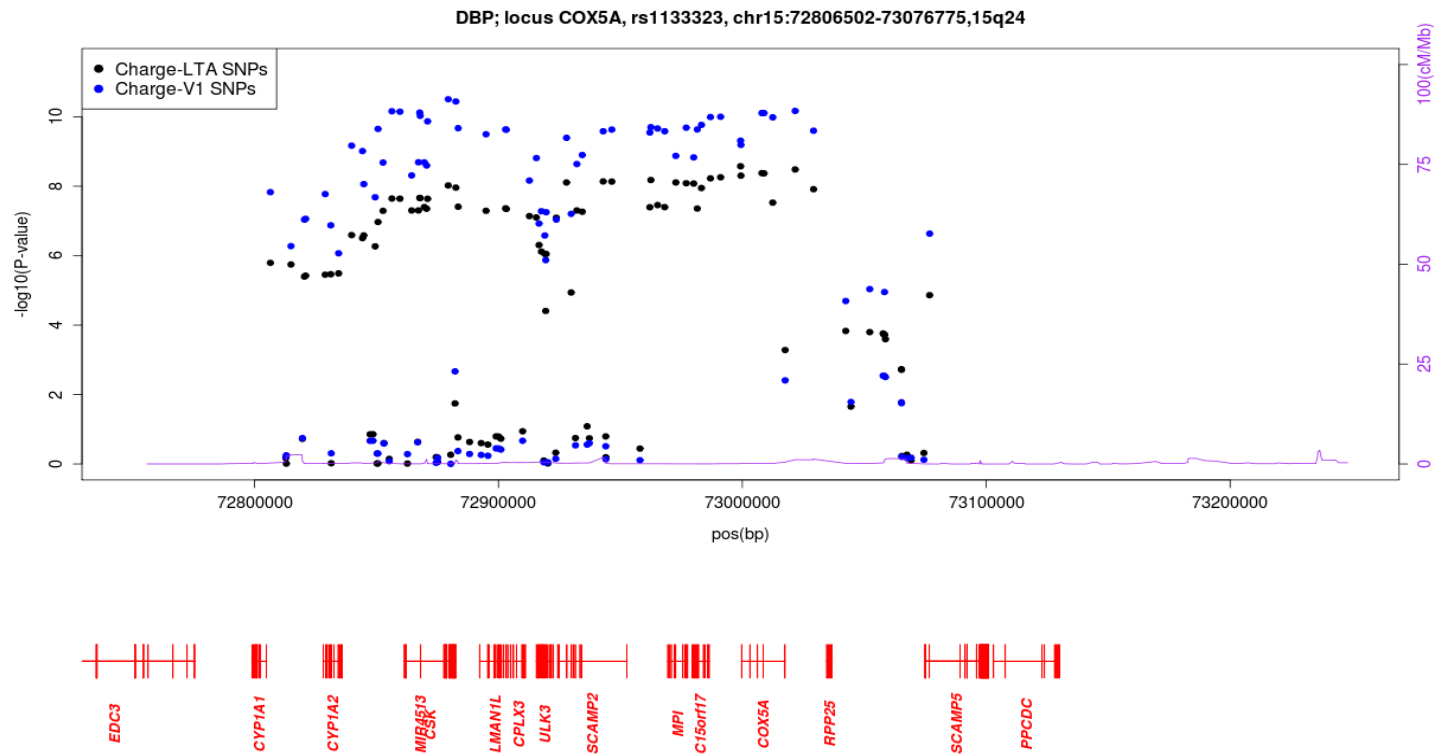

(b6)

# DBP, C20orf174, 20q13

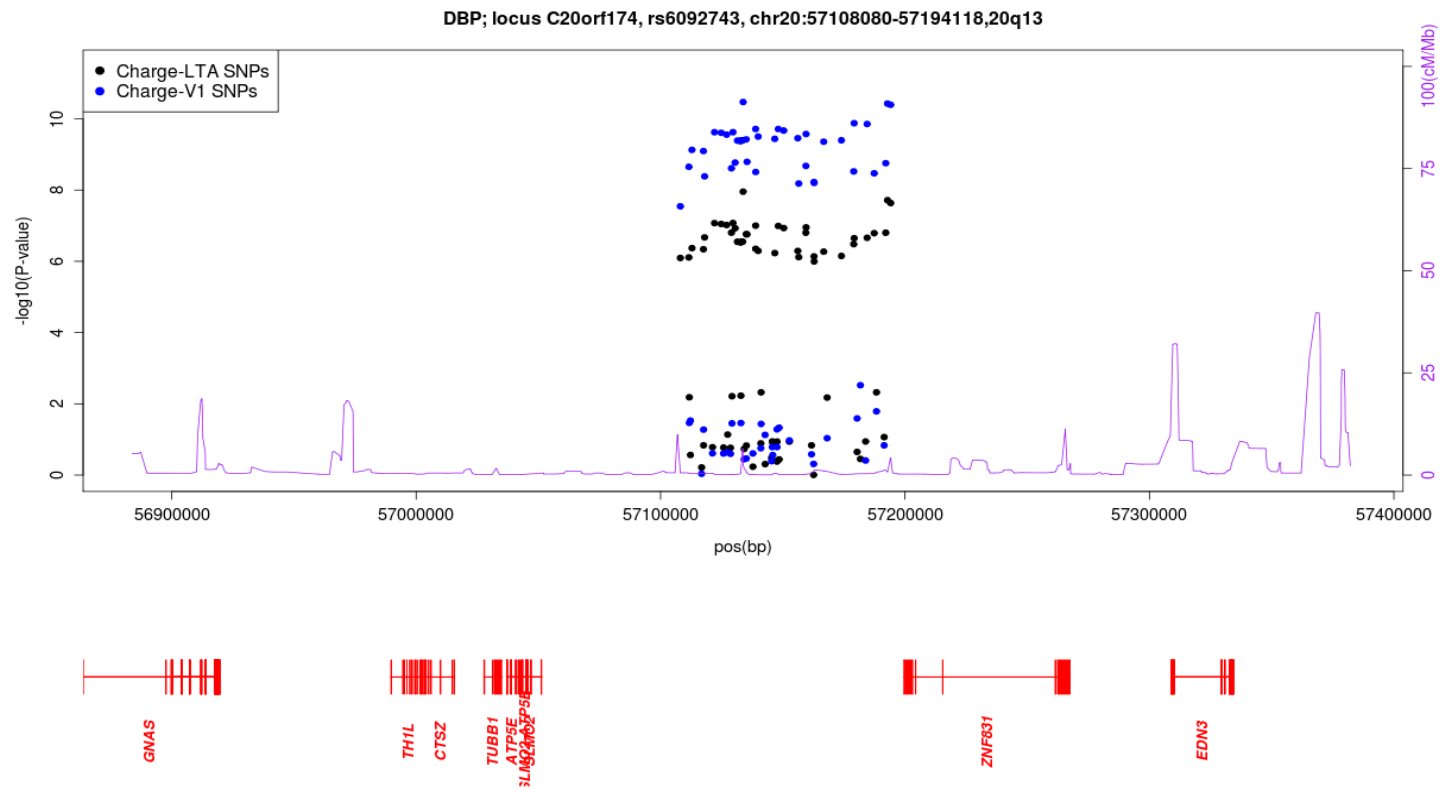

(b7)

# MAP, COX5A, 15q24

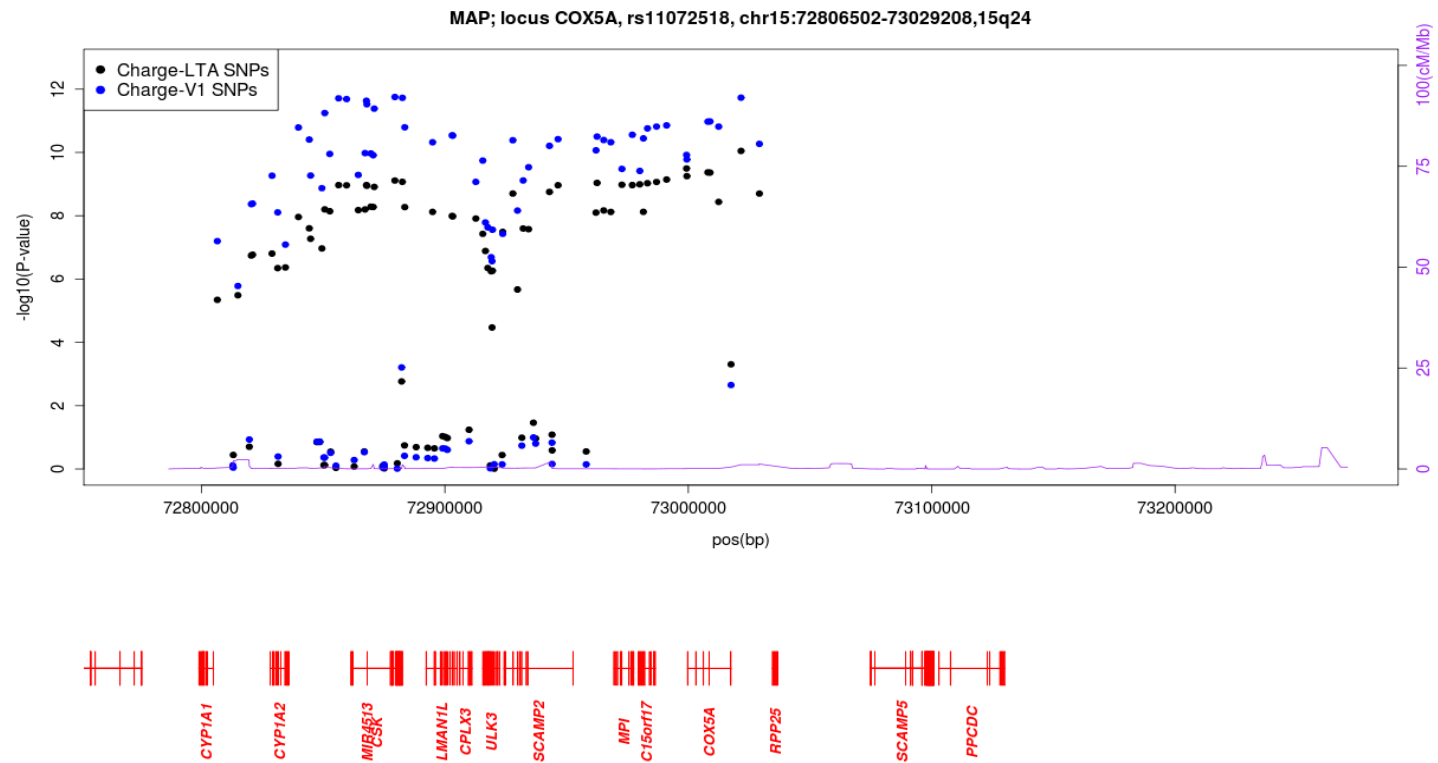

(b8)

# MAP, C20orf174, 20q13

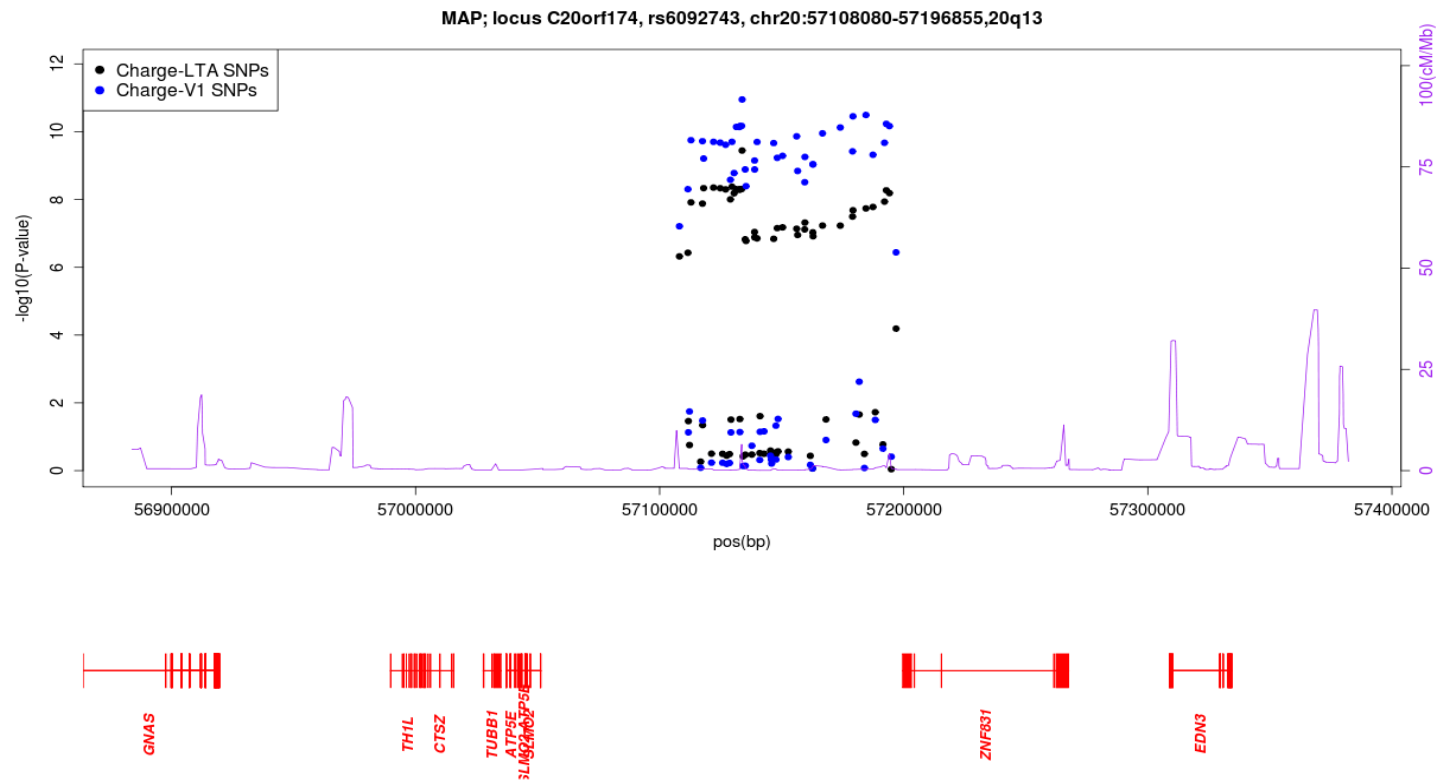

(c1)

# PP,ULK4,3p22

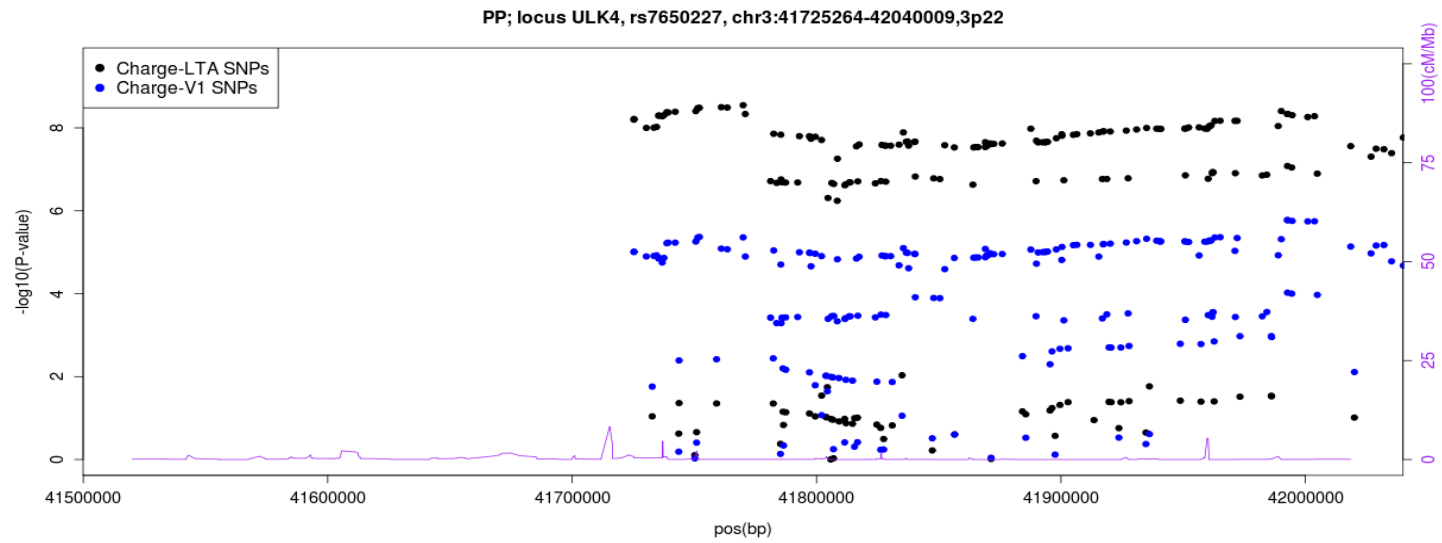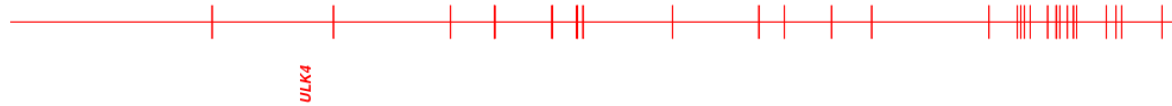

(d1)

# SBP, CASZ1

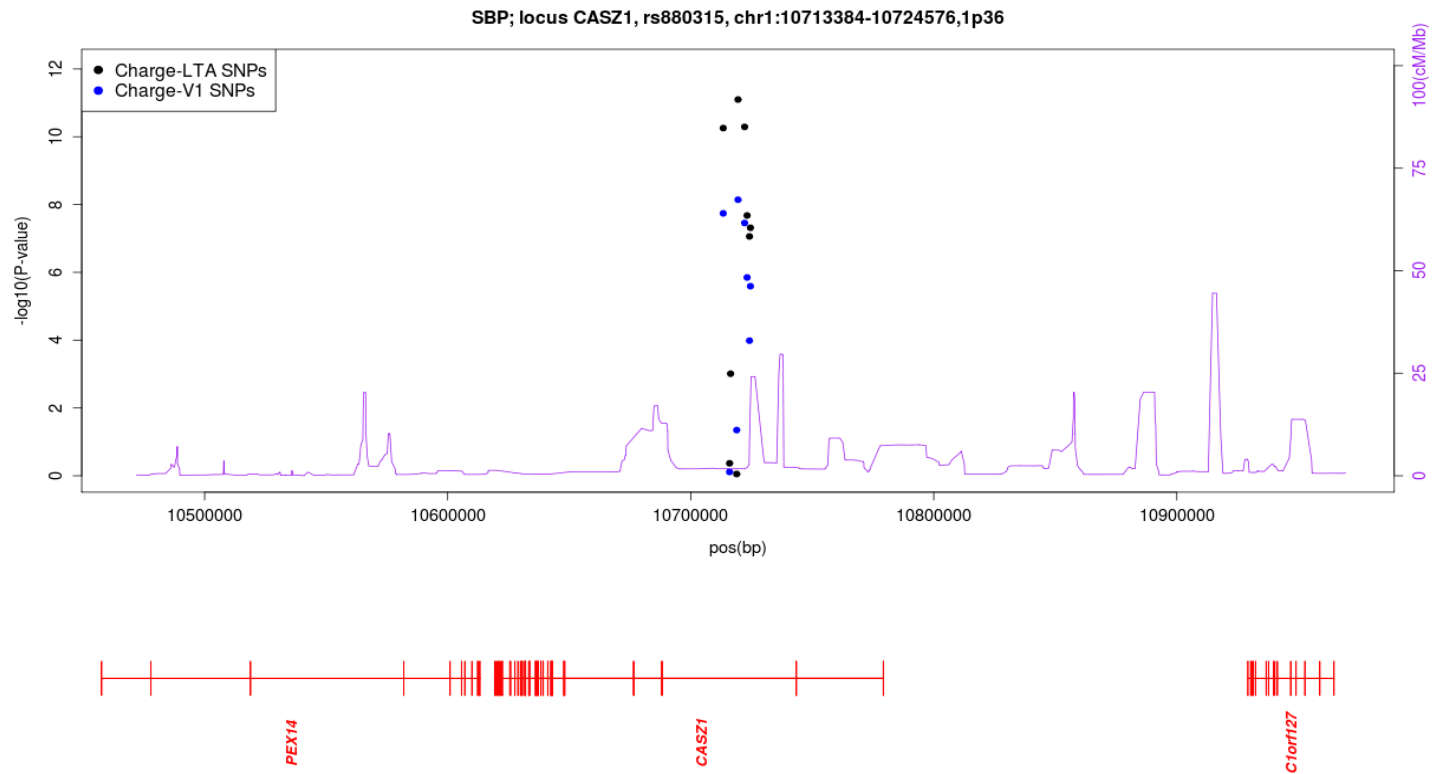

(d2)

# SBP, CACNB2

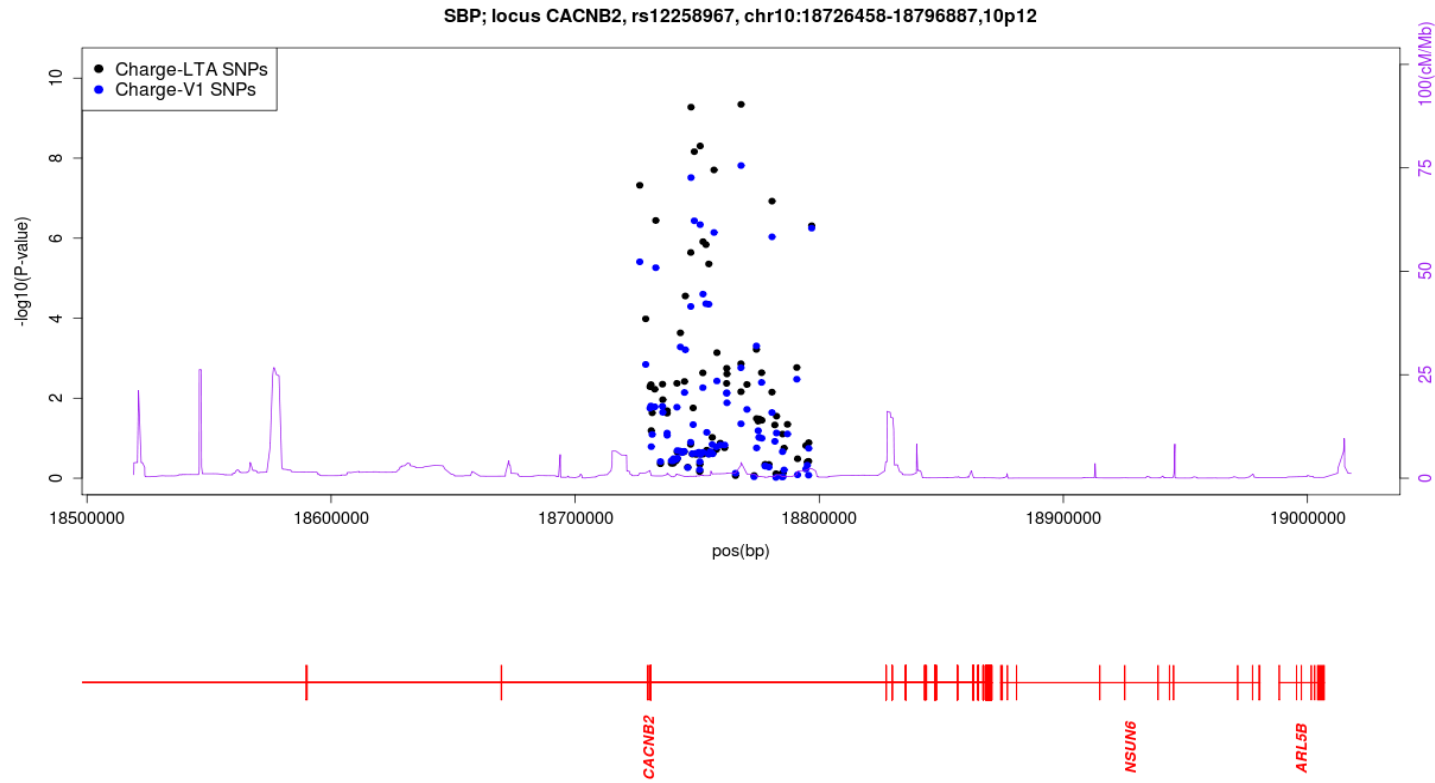



(d3)

# SBP, ATP2B1

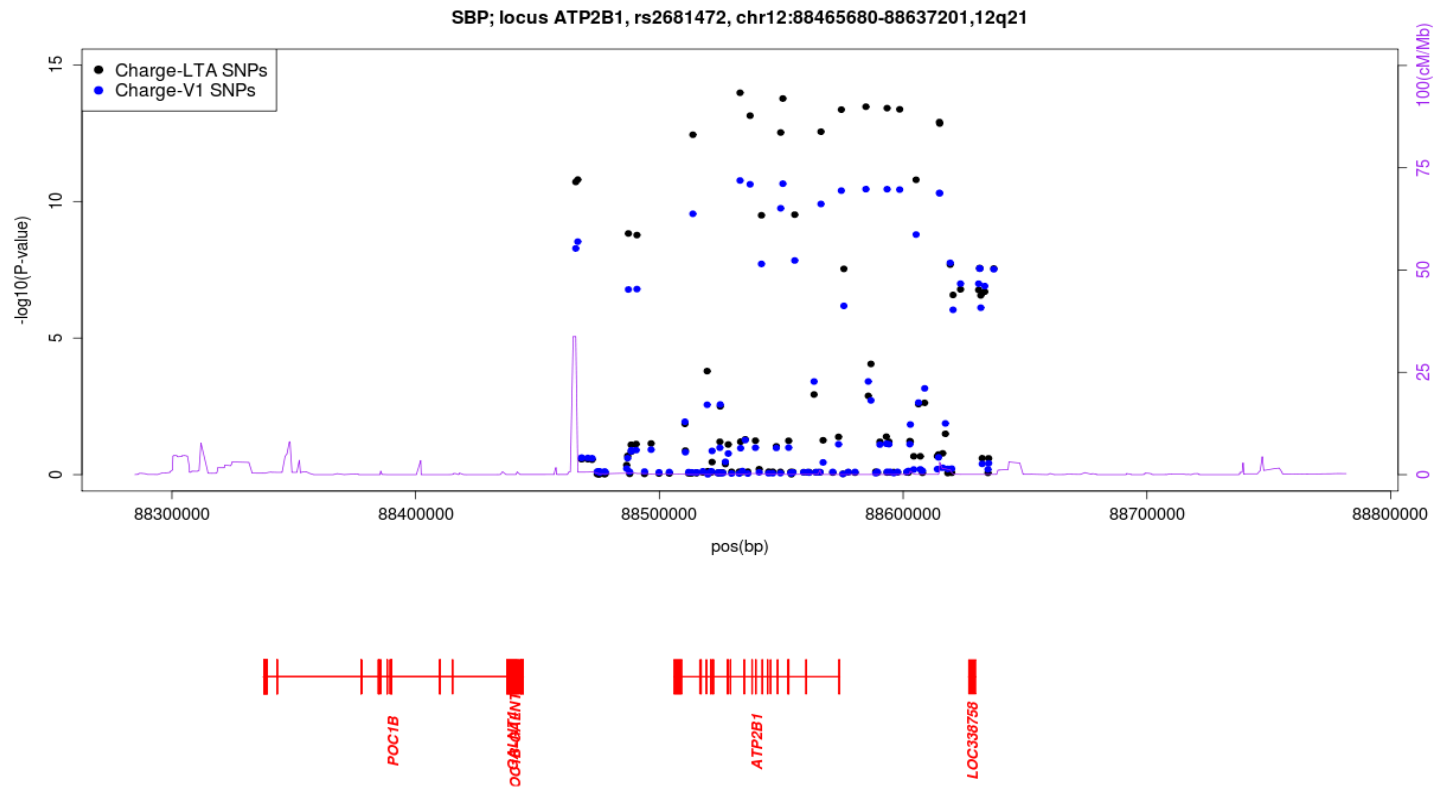

(d4)

# SBP, TBX3

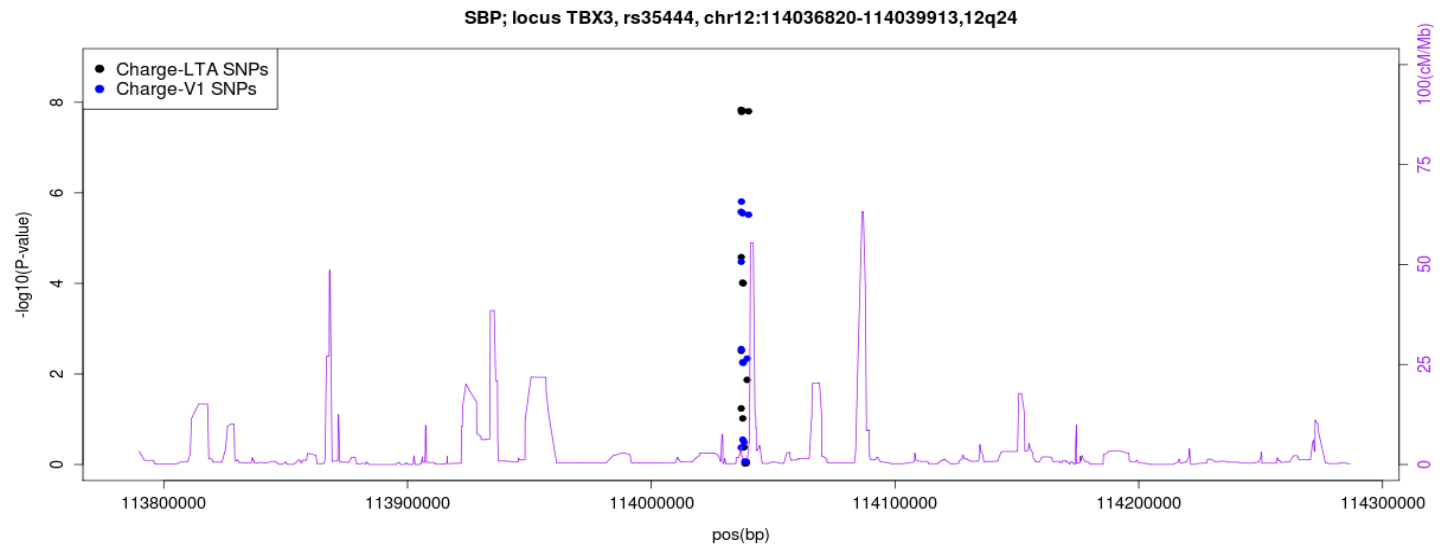

(d5)

# DBP, AGT

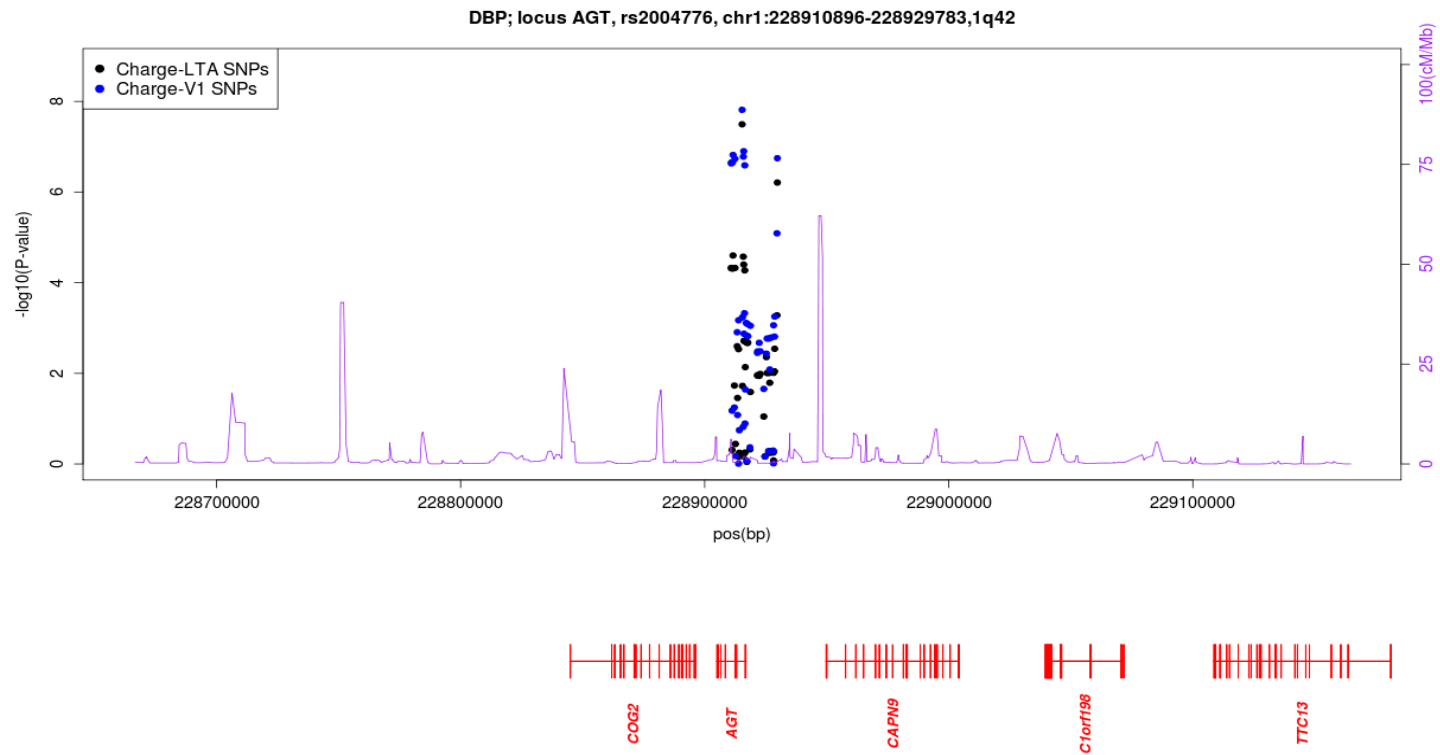

(d6)

# DBP, FER1L5

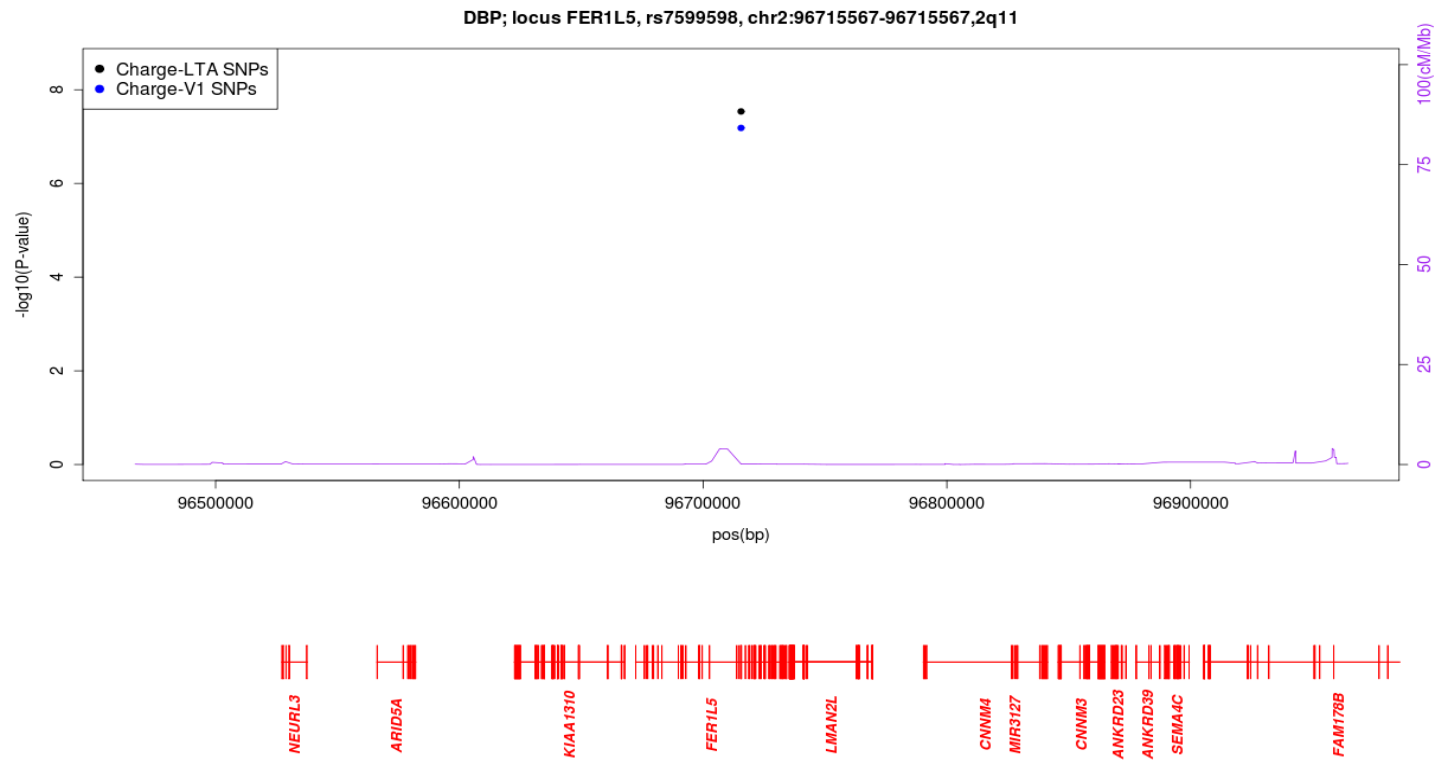

(d7)

# DBP, CACNB2

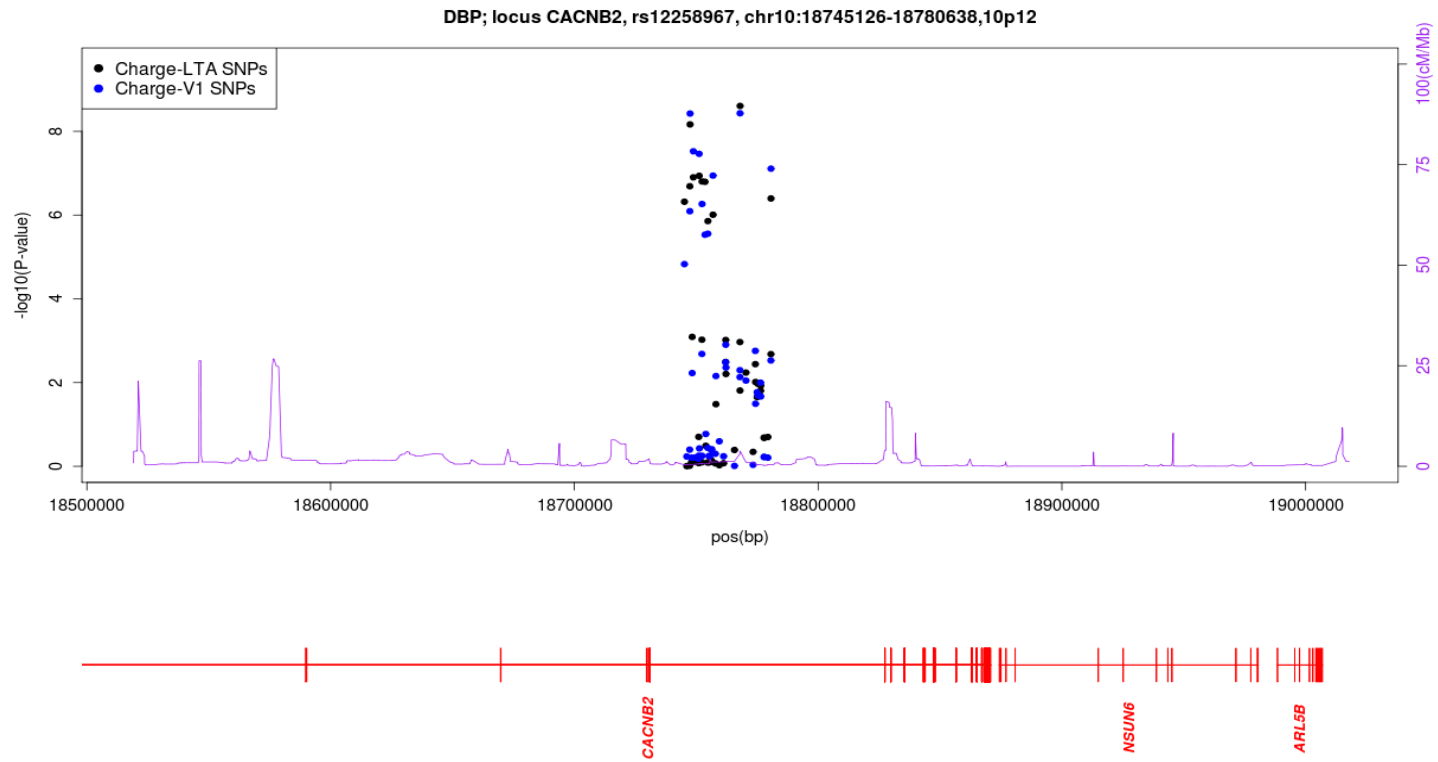

(d8)

# DBP, ADRB1

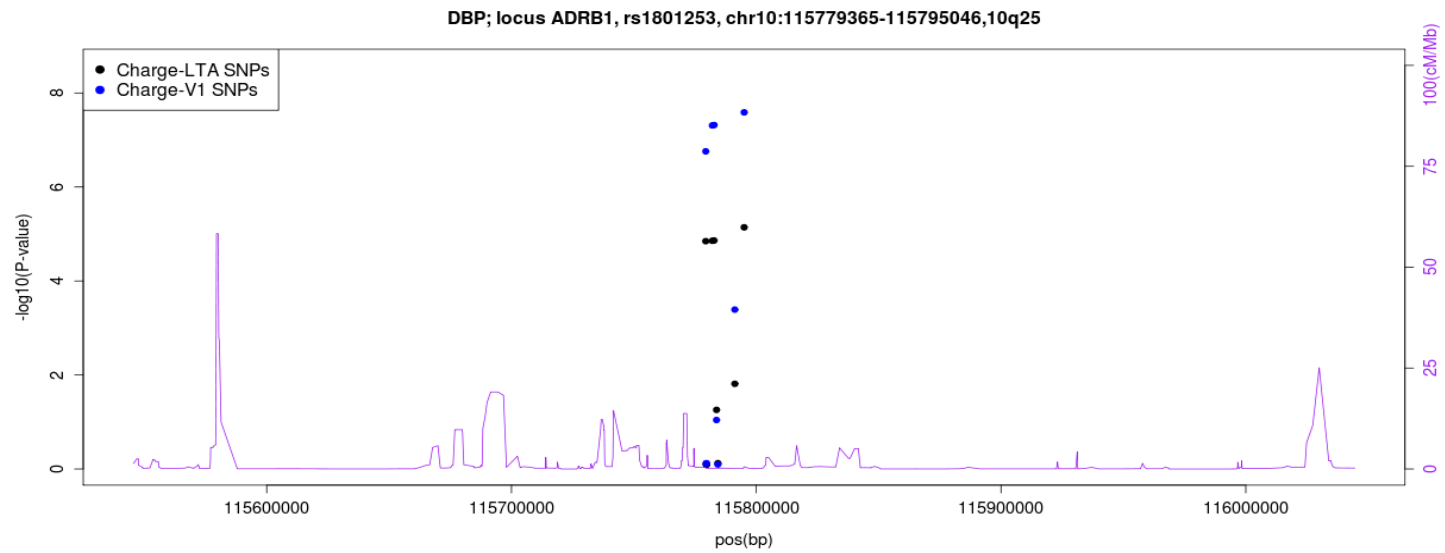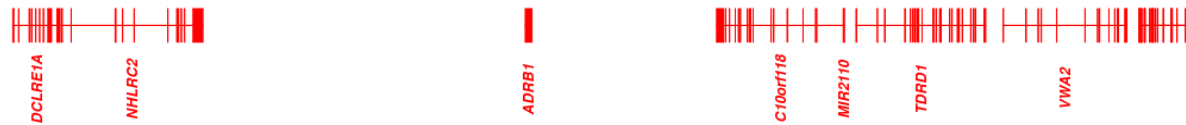

(d9)

# DBP, ATP2B1

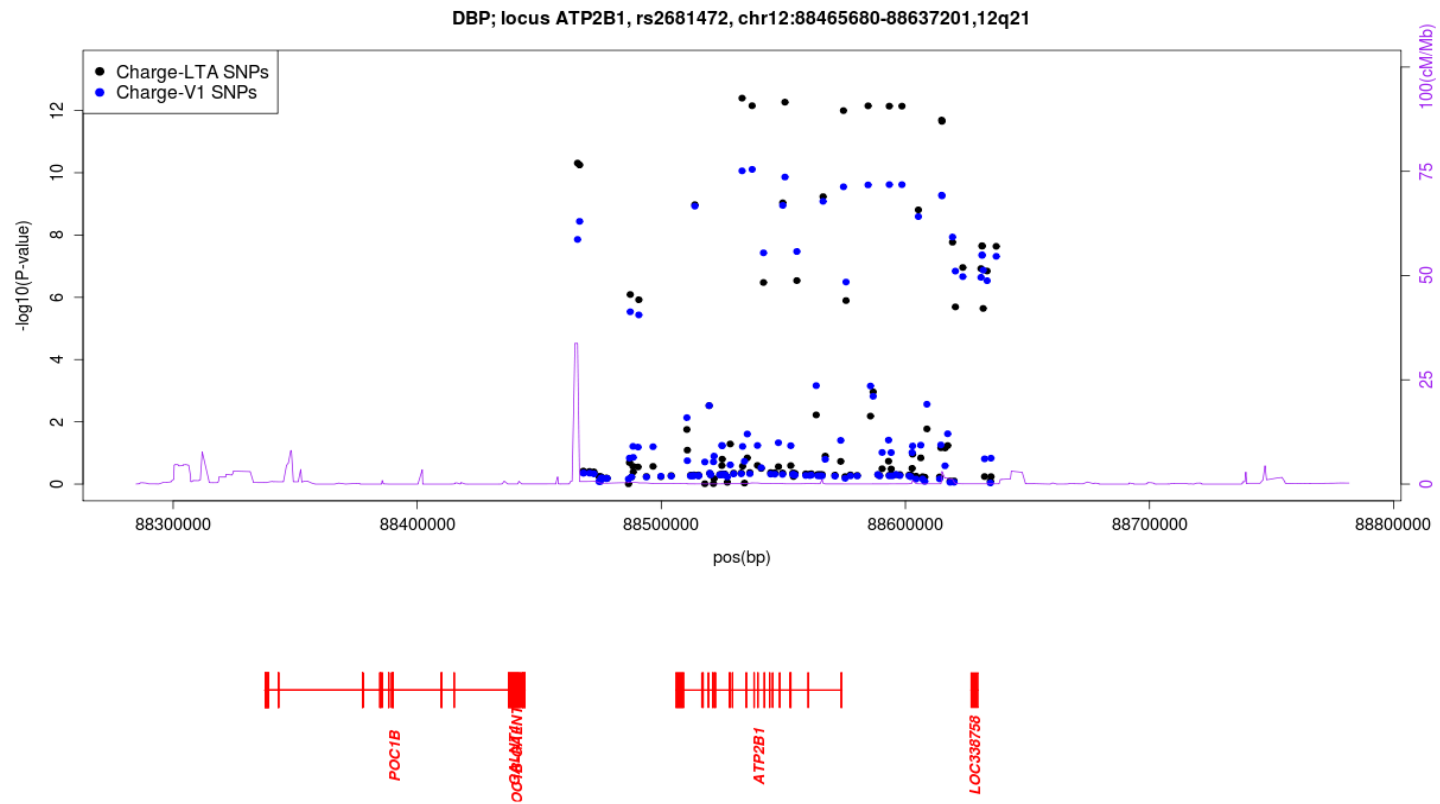

(d10)

# MAP, CASZ1

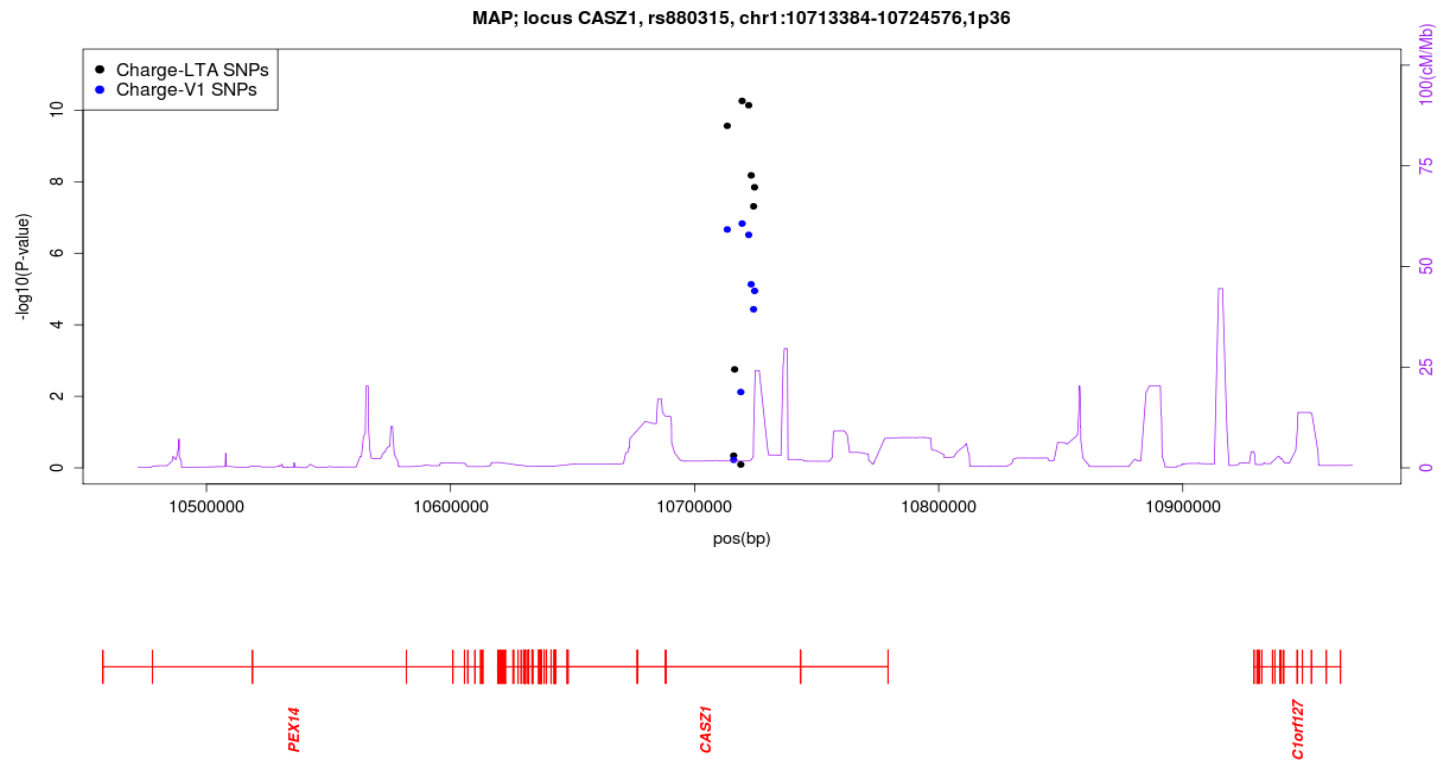



(d11)

# MAP, AGT

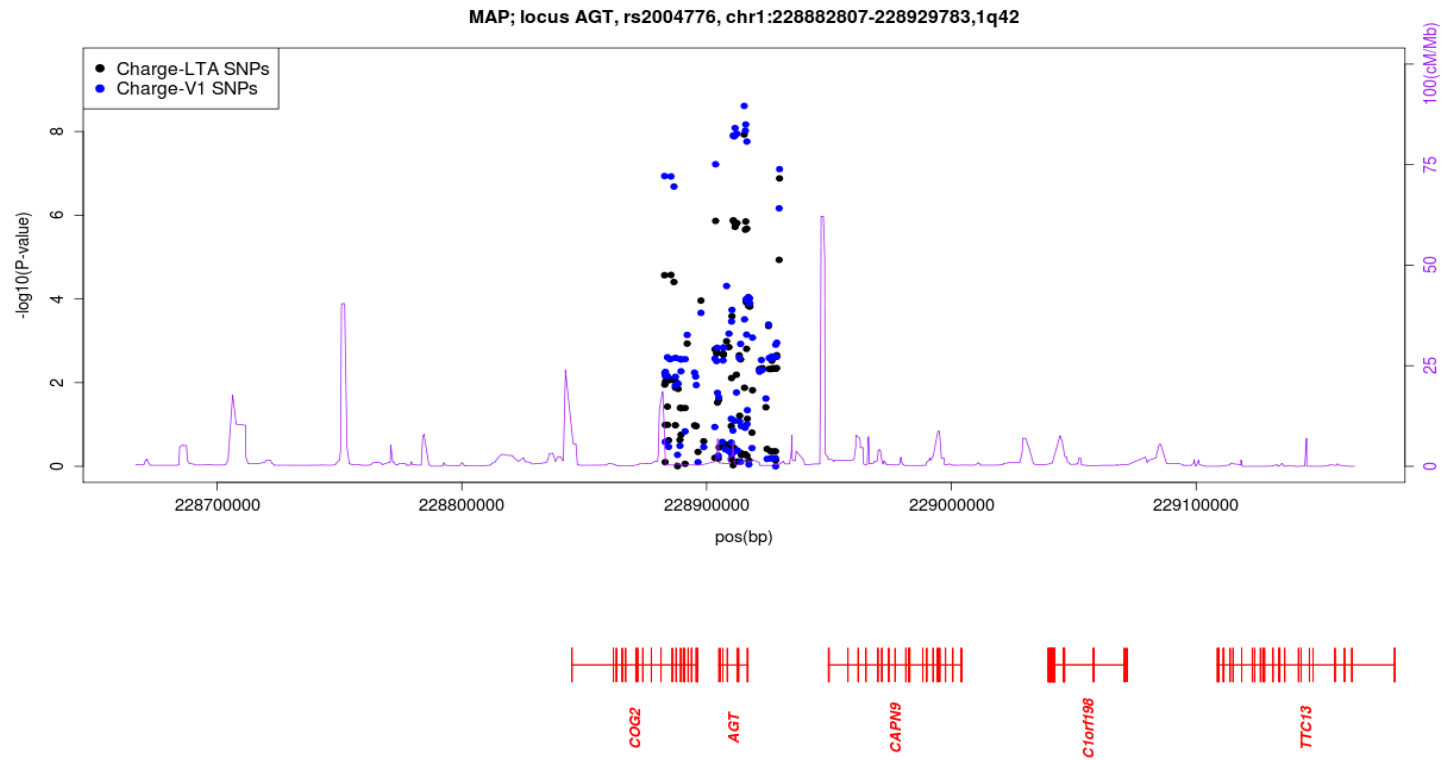

(d12)

# MAP, CACNB2

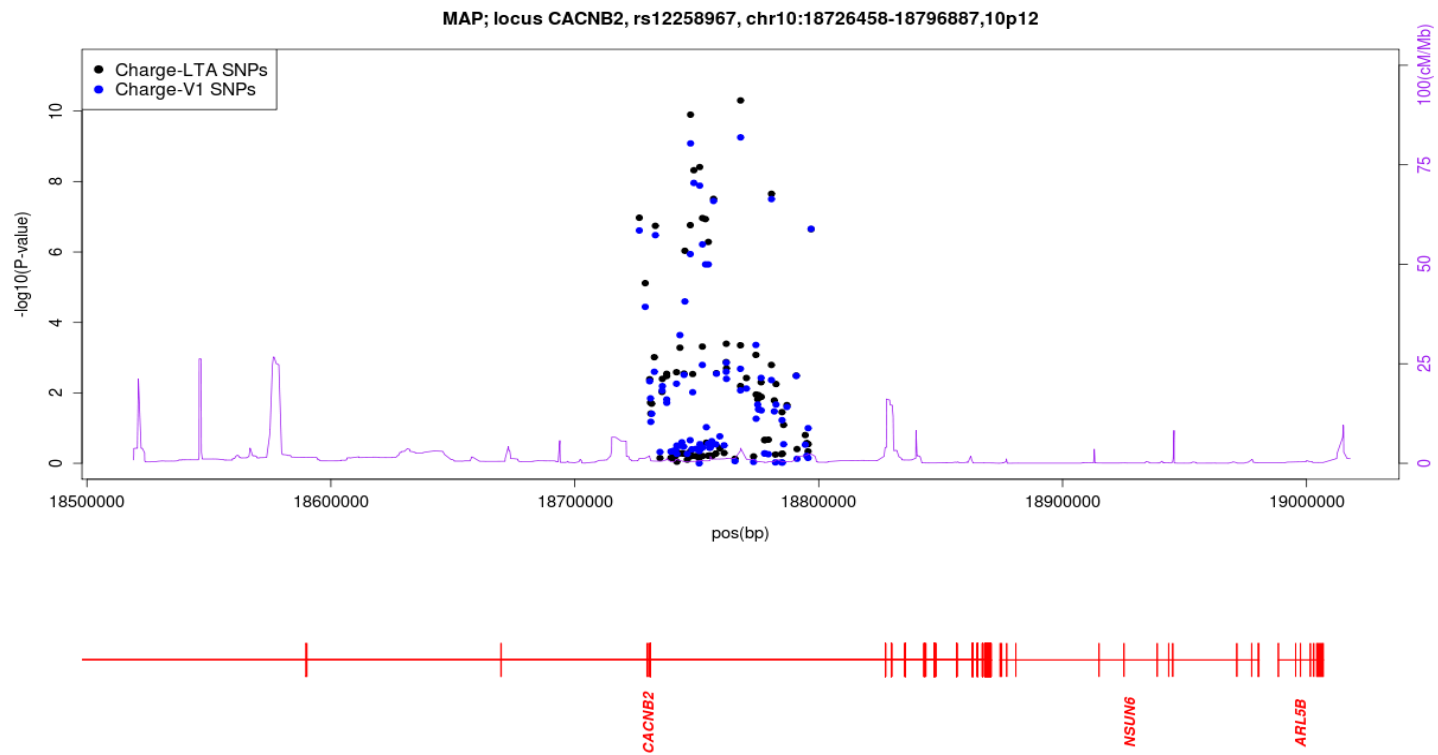

(d13)

# MAP, ADRB1

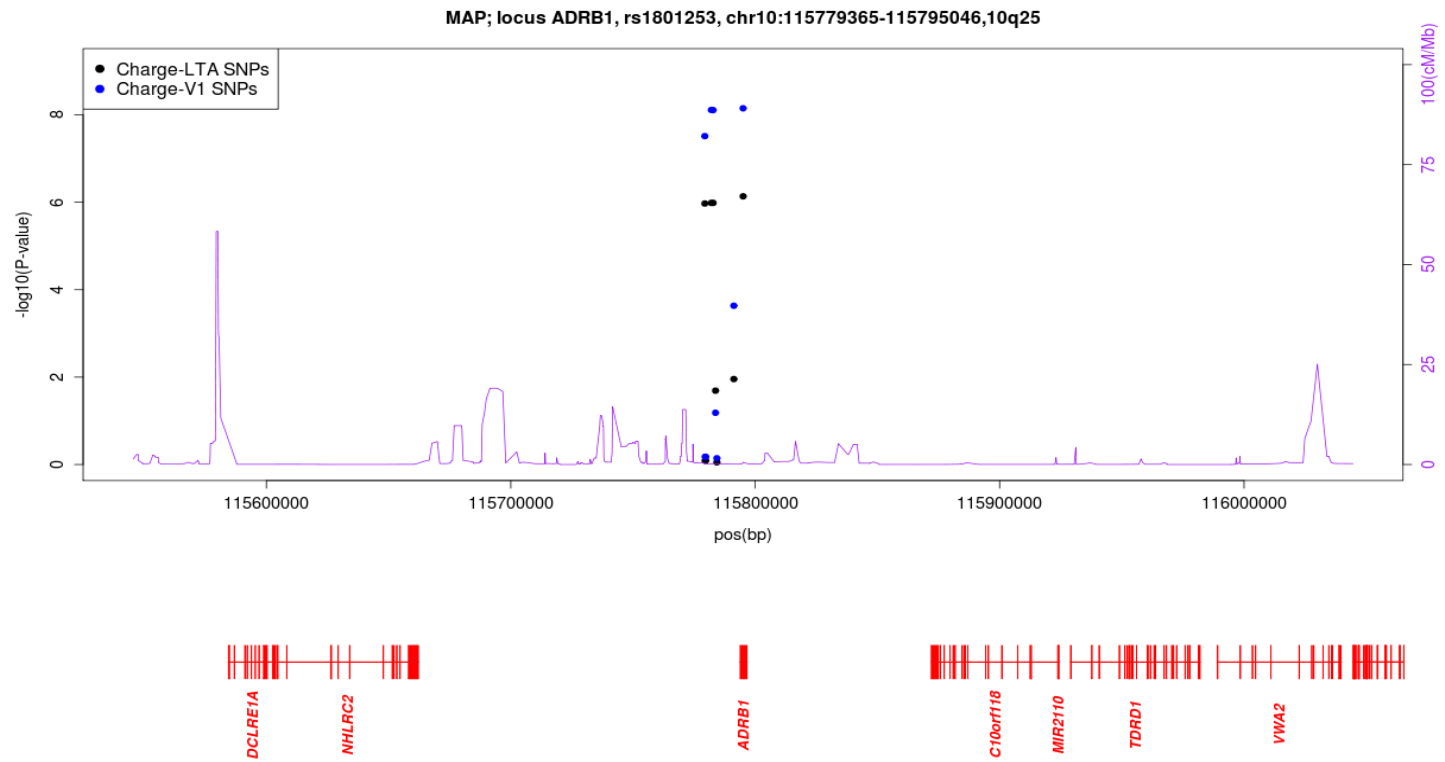

(d14)

# MAP, TBX3

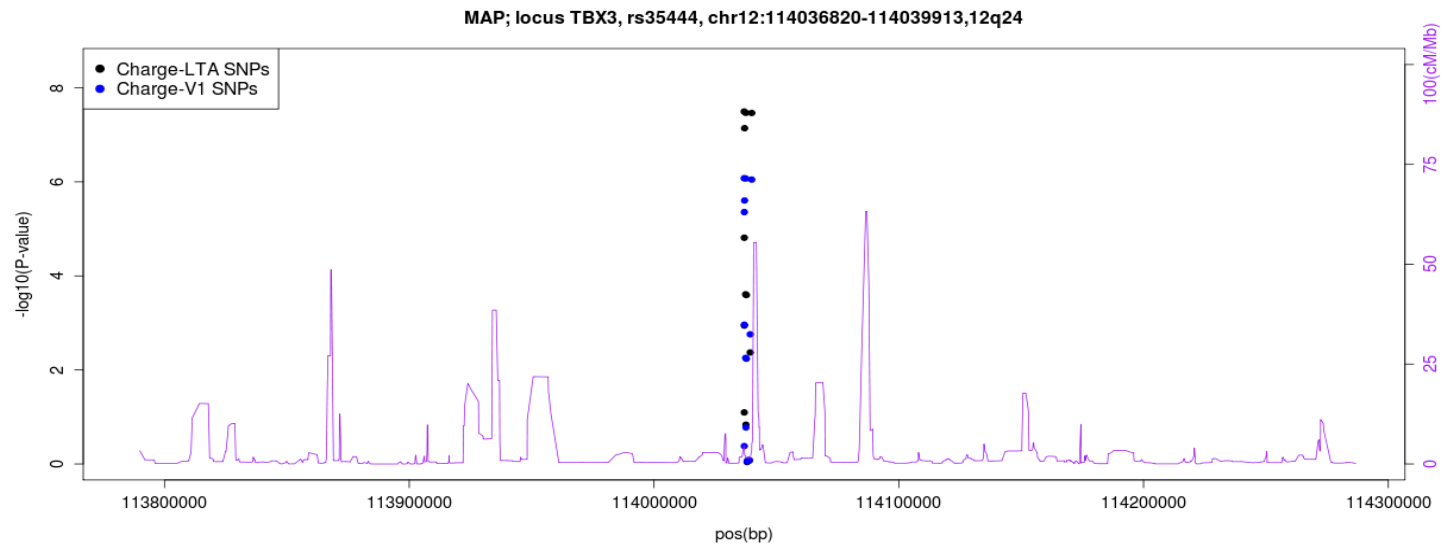

(d15)

# PP, CASZ1

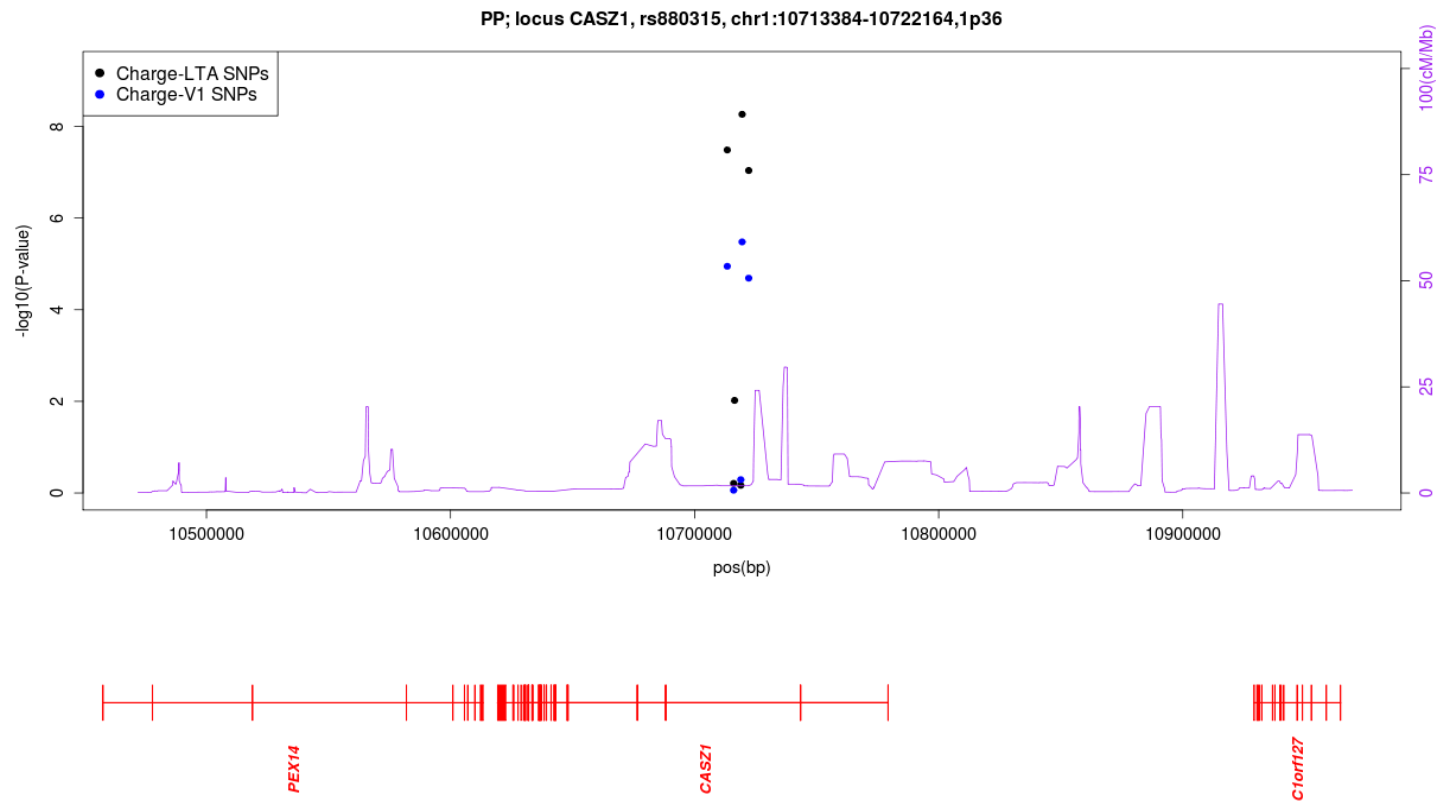

**Figure S8.** K-S test comparison cumulative fraction plot, where x-axis is the  $-\log_{10}(P)$  values and y-axis is the cumulative fraction.

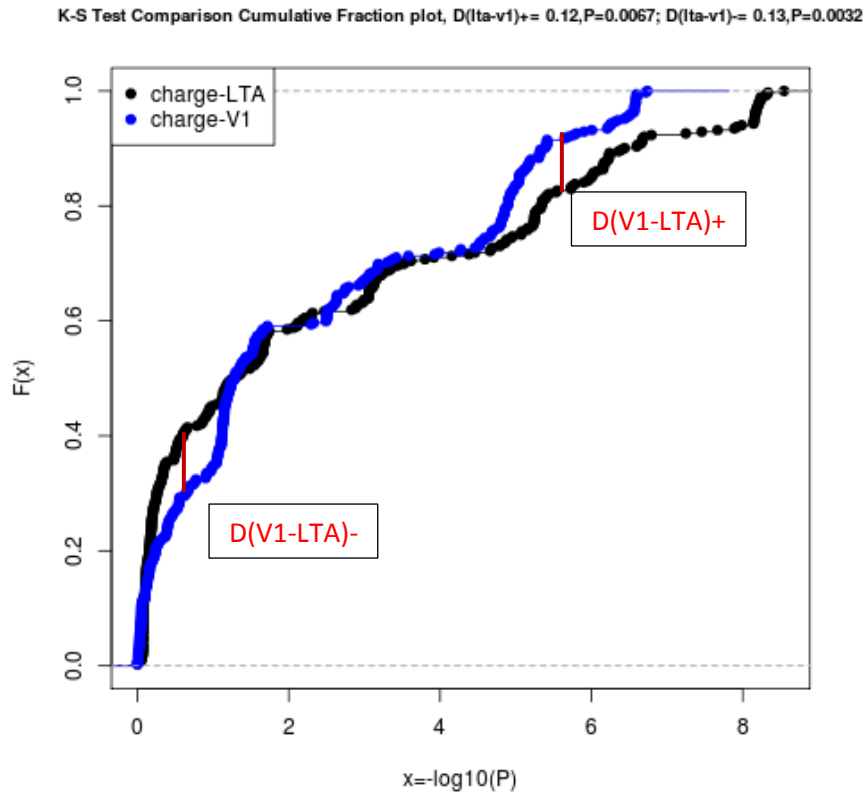

To identify regions in which the enrichment of V1 is larger than LTA or LTA larger than V1 significantly, we used the Kolmogorov-Smirnov (K-S) statistics to compare the  $-\log_{10}(P)$  values) within each region meeting criteria for genome-wide significance ( $P$  value  $< 5 \times 10^{-8}$ ). Regions with at least one marker with  $P$  value  $< 5 \times 10^{-8}$  in either LTA or V1 analysis were selected for enrichment analysis. Regions were defined as the lead SNP and by the LD-pruned list of SNPs in the region ( $r^2 > 0.3$ ). Since the KS-test uses the maximum vertical deviation between the two cumulative fraction curves as the statistic  $D$ , we used a one-tailed hypothesis test to test whether the positive vertical deviation derived from  $D(\text{cdf}(V1(X)) - \text{cdf}(LTA(X))) +$  was significant or whether the negative vertical deviation derived from  $D(\text{cdf}(V1(X)) - \text{cdf}(LTA(X))) -$  was significant, where  $X$  is the  $-\log_{10}(P)$  value).

Since the statistics based on different test directions are independent, for each region, two tests were conducted, one testing whether the LTA analysis yielded smaller  $P$  values than the V1 analysis, and vice versa. To test the structure and the strength of the K-S statistics, for each of the two tests, 10000 times permutation test was conducted by randomly shuffling the attributes of V1 and LTA and calculating new statistics repeatedly. From 10000 iterations, the permutation p-value was obtained by calculating the percentage of times when the original p-value from our data was smaller than the p-value of the new re-sampling data. Since the number of markers which selected for each region may influence the power of the K-S non-parametric test, regions with more markers may have a greater likelihood of being detected compared to regions with fewer markers. To overcome this issue, bootstrapping was used by

randomly selecting  $n$  markers from the  $N=2.5$  million whole-genome markers to do the K-S test of LTA and V1 10000 times, where  $n$  corresponds to the original number of markers we used for test in each region before. These 10000 test statistics were used as the baseline distribution, to test against whether regions with lower P values of association in the LTA or V1 analyses were truly significant compared to the distribution of the whole-genome-level baseline test statistics. Regions with true enrichment differences between LTA and V1 were identified as those with larger test statistics compared to the whole-genome-level distribution.

Two sample K-S statistics, where  $x$  is  $-\log_{10}(\text{Pvalue})$ :

$$D_{v1,LTA}^+ = \sup x (F_{1,v1}(x) - F_{2,LTA}(x))_+ :$$

The maximum vertical positive deviation between the cdf of V1 and LTA. Deviation at each point  $X$  will be taken into account only if  $\text{cdf}(V1(X)) - \text{cdf}(LTA(X))$  is positive. This statistics means to test whether LTA has larger P-value than V1 in general.

$$D_{v1,LTA}^- = \sup x (F_{1,v1}(x) - F_{2,LTA}(x))_- :$$

The maximum vertical negative deviation between the cdf of V1 and LTA. Deviation at each point  $X$  will be taken into account only if  $\text{cdf}(V1(X)) - \text{cdf}(LTA(X))$  is negative. This statistics means to test whether V1 has larger P-value than LTA in general.

**Figure S9.** Distribution of the K-S test statistics ( $D$ -,  $H1$ : V1 analysis is more enriched) from 10000 times boot-strapping of the whole-genome markers, where the number of markers selected each time is correspondence to the number used for test in CYP1A2 region in DBP analysis. The red line is the original K-S test statistics ( $D$ -) in this CYP1A2 region.

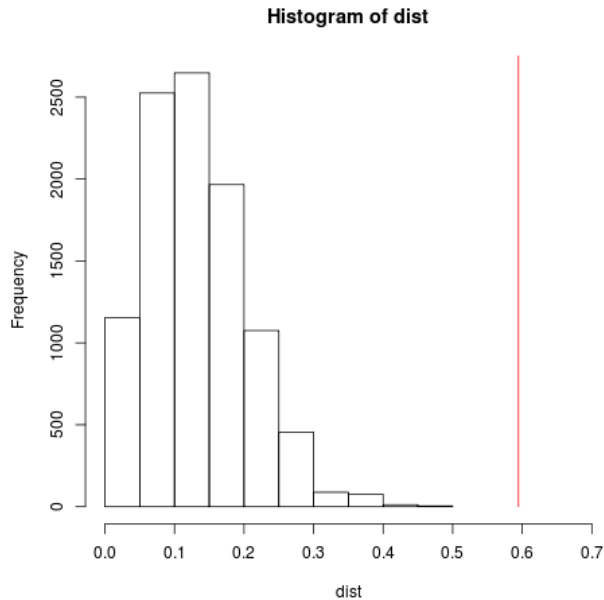

For the Bootstrapping computing method:

1. For each selected region, we identified the number of markers ( $n$ ) we used in our previous K-S test.
2. From the overall  $N=2.5$  million genome-wide markers in our LTA or V1 data, we will (i) randomly select  $n$  markers from the  $N$  complete marker pool as our test samples, or (ii) considered the 'region' to be markers in near side instead of from different far-away sites, thus we could also randomly select one marker as the position start and then select the following  $n$  markers around this one marker as our test samples.
3. Used the sample we selected in 2 to do the K-S test. Then report the test statistics.
4. Repeated step2 to step3 many times(at least 100 times, depend on the computing speed)
5. Calculated the percentage when the simulated statistics is larger than the original K-S statistics.

Suppose the genome-wide markers are the baseline, when we randomly selected the markers from them to do the test, the test statistics should be not large (in other words, should be not significant) compared to the test statistics we got from the selected region we identified as the potential change region. Therefore, the percentage when the simulated test statistics is larger than our original K-S test statistics can be seen as the bootstrapping  $P$  value. If the  $P$  value was small enough, then we can say the region we identified is truly the one with enrichment change.



**Table S1: Sample sizes available for the LTA analyses and Visit 1 analyses.**

| <b>Cohort</b> | <b>LTA Sample Size</b> | <b>Visit1 Sample Size Available</b> |
|---------------|------------------------|-------------------------------------|
| AGES          | 526                    | 3,219                               |
| ARIC          | 7,310                  | 8,778                               |
| CARDIA        | 1,671                  | 1,595                               |
| CHS           | 3,159                  | 3,295                               |
| FHS           | 3,895                  | 8,096                               |
| MESA          | 2,414                  | 2,414                               |
| RS1           | 4,710                  | 4,838                               |
| RS2           | 1,535                  | 1,535                               |
| WGHS          | 21,409                 | 21,670                              |
| <b>Total</b>  | <b>46,629</b>          | <b>55,440</b>                       |

**Table S2: Cohort summaries across all visit included in the analyses**

|               |                           | Year      | N      | Age,<br>years (sd) | BMI,<br>kg/m <sup>2</sup> (sd) | SBP,<br>mmHg (sd) | DBP,<br>mmHg (sd) | Anti-hypertensive<br>therapy (%) |
|---------------|---------------------------|-----------|--------|--------------------|--------------------------------|-------------------|-------------------|----------------------------------|
| AGES          | Visit 1 (Reykjavik Study) | 1987-1995 | 530    | 66.01 (7.0)        | 26.2 (3.9)                     | 141.4 (18.8)      | 82.1 (8.7)        | 24%                              |
| AGES          | Visit 2 (AGES)            | 2002-2005 | 530    | 78.49 (5.9)        | 26.5 (4.3)                     | 143.4 (21.2)      | 73.1 (9.8)        | 65%                              |
| ARIC          | Visit 1                   | 1986-1990 | 8,778  | 54.3 (5.7)         | 27.0 (4.9)                     | 118.5 (17.0)      | 71.7 (10.0)       | 26%                              |
| ARIC          | Visit 2                   | 1990-1993 | 7,844  | 57.2 (5.7)         | 27.4 (5.0)                     | 119.9 (17.8)      | 71.3 (9.9)        | 28%                              |
| ARIC          | Visit 3                   | 1993-1996 | 7,214  | 60.3 (5.6)         | 28.0 (5.3)                     | 122.9 (18.0)      | 70.8 (10.0)       | 33%                              |
| ARIC          | Visit 4                   | 1996-1999 | 6,582  | 63.1 (5.6)         | 28.4 (5.3)                     | 126.1 (18.4)      | 70.0 (9.9)        | 40%                              |
| CARDIA        | Visit 4                   | 1993-1994 | 1,595  | 32.6 (3.3)         | 25.6 (5.1)                     | 106.3 (11.4)      | 67.8 (9.5)        | 0.88%                            |
| CARDIA        | Visit 5                   | 1996-1997 | 1,571  | 35.6 (3.4)         | 26.1 (5.4)                     | 107.2 (11.3)      | 70.4 (9.4)        | 1.34%                            |
| CARDIA        | Visit 6                   | 2001-2002 | 1,601  | 40.7 (3.4)         | 27.2 (5.9)                     | 110.2 (13.4)      | 72.5 (10.3)       | 4.06%                            |
| CARDIA        | Visit 7                   | 2006-2007 | 1,563  | 45.8 (3.4)         | 27.9 (5.9)                     | 113.4 (13.6)      | 69.9 (10.6)       | 11.34%                           |
| CHS           | Visit 0                   | 1989-90   | 3,153  | 72.2 (5.2)         | 26.3 (4.4)                     | 134.9 (20.9)      | 70.3 (11.4)       | 35%                              |
| CHS           | Visit 1                   | 1990-91   | 3,056  | 73.1 (5.2)         | -                              | 132.2 (20.4)      | 69.3 (10.3)       | 37%                              |
| CHS           | Visit 2                   | 1992-93   | 2,991  | 74.1 (5.2)         | -                              | 133.4 (20.2)      | 69.5 (10.4)       | 39%                              |
| CHS           | Visit 3                   | 1993-94   | 2,838  | 75.0 (5.1)         | 26.4 (4.5)                     | 135.3 (20.9)      | 70.8 (10.9)       | 41%                              |
| FHS-offspring | Visit 23                  | 1992-1996 | 579    | 80.0 (4.4)         | 26.7 (4.6)                     | 148.1 (23.5)      | 72.9 (11.3)       | 49%                              |
| FHS-offspring | Visit 24                  | 1995-1998 | 525    | 82.0 (4.2)         | 26.4 (4.5)                     | 146.8 (21.7)      | 73.2 (10.7)       | 51%                              |
| FHS-offspring | Visit 25                  | 1997-1999 | 486    | 83.8 (4.1)         | 26.2 (4.6)                     | 146.9 (21.9)      | 71.8 (11.7)       | 55%                              |
| FHS-offspring | Visit 26                  | 2000-2001 | 389    | 85.6 (4.0)         | 26.2 (4.7)                     | 146.6 (22.6)      | 71.2 (11.2)       | 60%                              |
| FHS-offspring | Visit 20                  | 1986-1990 | 598    | 74.4 (4.5)         | 26.8 (4.6)                     | 150.3 (22.6)      | 78.8 (10.7)       | 43%                              |
| FHS-offspring | Visit 21                  | 1988-1992 | 606    | 76.4 (4.6)         | 27.1 (4.5)                     | 149.8 (22.3)      | 77.1 (10.7)       | 48%                              |
| FHS-offspring | Visit 22                  | 1990-1994 | 588    | 78.2 (4.4)         | 26.9 (4.7)                     | 147.8 (21.3)      | 74.6 (11.1)       | 47%                              |
| FHS           | Visit 4                   | 1987-1991 | 3,108  | 50.7 (9.8)         | 26.8 (4.9)                     | 127.4 (20.0)      | 79.7 (10.6)       | 15%                              |
| FHS           | Visit 5                   | 1991-1995 | 3,104  | 54.4 (9.8)         | 27.4 (4.9)                     | 127.4 (20.0)      | 75.4 (10.3)       | 17%                              |
| FHS           | Visit 6                   | 1995-1998 | 2,975  | 58.3 (9.7)         | 27.9 (5.1)                     | 130.6 (20.4)      | 76.8 (10.0)       | 26%                              |
| FHS           | Visit 7                   | 1998-2001 | 2,954  | 61.0 (9.5)         | 28.1 (5.3)                     | 130.1 (20.4)      | 75.7 (10.1)       | 32%                              |
| MESA          | Exam 1                    | 2000-2002 | 2,414  | 62.7               | 27.7 (5.0)                     | 123.5 (20.5)      | 70.2 (10.0)       | 33%                              |
| MESA          | Exam 2                    | 2002-2004 | 2,383  | 64.2               | 27.1 (5.1)                     | 121.1 (19.2)      | 68.8 (9.6)        | 39%                              |
| MESA          | Exam 3                    | 2004-2005 | 2,302  | 65.5               | 27.7 (5.2)                     | 120.0 (19.6)      | 68 (10.9)         | 42%                              |
| MESA          | Exam 4                    | 2005-2007 | 2,219  | 66.9               | 27.8 (5.2)                     | 120.5 (19.3)      | 68.02 (9.7)       | 45%                              |
| RS1           | Visit 1                   | 1990-1993 | 4,838  | 67.9               | 26.3 (3.6)                     | 140.4 (22.8)      | 74.9 (11.7)       | 22%                              |
| RS1           | Visit 2                   | 1994-1995 | 4,678  | 70.0               | 26.4 (3.7)                     | 144.1 (23.4)      | 78.3 (12.3)       | 30%                              |
| RS1           | Visit 3                   | 1997-1999 | 3,562  | 72.6               | 26.8 (3.9)                     | 146.0 (22.4)      | 76.4 (11.7)       | 26%                              |
| RS1           | Visit 4                   | 2002-2004 | 2,691  | 75.5               | 27.4 (4.1)                     | 156.7 (23.2)      | 81.2 (11.7)       | 37%                              |
| RS2           | Visit 1                   | 2001-2001 | 1,535  | 63.7               | 27.2 (4.1)                     | 143.4 (21.6)      | 79.7 (11.1)       | 21%                              |
| RS2           | Visit 2                   | 2004-2006 | 1,535  | 67.9               | 27.8 (4.1)                     | 148.1 (21.4)      | 81.2 (11.2)       | 30%                              |
| WGHS          | Visit 1                   | 1992-1994 | 21,670 | 54.7               | 25.9 (4.9)                     | 124.8 (15.4)      | 77.3 (9.7)        | 13%                              |
| WGHS          | Visit 2                   | 1996-1998 | 19,410 | 58.2               | 26.5 (5.1)                     | 127.3 (16.7)      | 76.8 (9.8)        | 23%                              |
| WGHS          | Visit 3                   | 2003-2005 | 18,625 | 65.2               | 26.9 (5.4)                     | 128.4 (14.7)      | 76.1 (8.9)        | 43%                              |

**Table S3: Genomic control inflation factors ( $\lambda_{GC}$ ).**

**LTA**

**LTA- SBP**

|       |       |       |       |       |       |       |       |        |               |
|-------|-------|-------|-------|-------|-------|-------|-------|--------|---------------|
| AGES  | ARIC  | CHS   | FHS   | RS1   | RS2   | WGHS  | MESA  | CARDIA | Meta-analysis |
| 1.014 | 1.052 | 1.009 | 1.061 | 1.034 | 1.002 | 1.093 | 0.996 | 1.015  | 1.074         |

**LTA - DBP**

|       |       |       |       |       |       |       |       |        |               |
|-------|-------|-------|-------|-------|-------|-------|-------|--------|---------------|
| AGES  | ARIC  | CHS   | FHS   | RS1   | RS2   | WGHS  | MESA  | CARDIA | Meta-analysis |
| 1.005 | 1.046 | 1.034 | 1.051 | 1.036 | 1.014 | 1.065 | 1.006 | 1.012  | 1.088         |

**LTA - PP**

|       |       |       |       |       |       |       |       |        |               |
|-------|-------|-------|-------|-------|-------|-------|-------|--------|---------------|
| ARIC  | CHS   | FHS   | RS1   | RS2   | AGES  | WGHS  | MESA  | CARDIA | Meta-analysis |
| 1.041 | 1.023 | 1.026 | 1.037 | 1.017 | 1.015 | 1.071 | 0.996 | 1.031  | 1.055         |

**LTA - MAP**

|       |       |       |       |       |       |       |       |        |               |
|-------|-------|-------|-------|-------|-------|-------|-------|--------|---------------|
| ARIC  | CHS   | FHS   | RS1   | RS2   | AGES  | WGHS  | MESA  | CARDIA | Meta-analysis |
| 1.048 | 1.031 | 1.022 | 1.039 | 1.006 | 1.019 | 1.101 | 0.996 | 1.008  | 1.095         |

**Visit 1**

**Visit 1 - SBP**

|       |       |       |       |       |       |       |       |        |               |
|-------|-------|-------|-------|-------|-------|-------|-------|--------|---------------|
| AGES  | ARIC  | CHS   | FHS   | RS1   | RS2   | WGHS  | MESA  | CARDIA | Meta-analysis |
| 1.014 | 1.052 | 1.009 | 1.061 | 1.034 | 1.002 | 1.093 | 0.996 | 1.025  | 1.076         |

**Visit 1 - DBP**

|       |       |       |       |       |       |       |       |        |               |
|-------|-------|-------|-------|-------|-------|-------|-------|--------|---------------|
| AGES  | ARIC  | CHS   | FHS   | RS1   | RS2   | WGHS  | MESA  | CARDIA | Meta-analysis |
| 1.005 | 1.046 | 1.034 | 1.051 | 1.036 | 1.014 | 1.065 | 1.006 | 1.025  | 1.066         |

**Table S4: All trait-SNPs with  $P$  value  $< 5 \times 10^{-8}$  in the LTA analyses ( LTA  $P$  value  $< 5 \times 10^{-8}$ , Total 488 SNPs, 117 SBP, 96 DBP, 155 MAP, and 120 PP SNPs).**

| Trait   | SNPID      | Chr   | Position  | Bui Allele1 | Allele2 | Beta    | s.e.   | P        | Direction | InRefGene | RefGenes:60kbfromSNP               | ClosestRefGene | DistanceFromClosestRefGene |
|---------|------------|-------|-----------|-------------|---------|---------|--------|----------|-----------|-----------|------------------------------------|----------------|----------------------------|
| LTA-SBP | rs1275986  | 2p23  | 26765583  | a           | c       | -0.5974 | 0.0917 | 3.22E-10 | ----->    | NA        | KCNK3,CIB4                         | KCNK3          | 3539                       |
| LTA-SBP | rs10858914 | 12q21 | 88555526  | t           | c       | 0.5902  | 0.0904 | 3.02E-10 | +++++>    | ATP2B1    | ATP2B1                             | ATP2B1         | 18449                      |
| LTA-SBP | rs7537765  | 1p36  | 11809890  | a           | g       | 0.8523  | 0.1221 | 1.60E-11 | +++++>    | CLCN6     | MTHFR,NPPA,CLCN6,NPPB              | CLCN6          | 972                        |
| LTA-SBP | rs1275979  | 2p23  | 26777072  | t           | c       | 0.5921  | 0.0919 | 5.15E-10 | +++++>    | KCNK3     | KCNK3,CIB4                         | KCNK3          | 7950                       |
| LTA-SBP | rs10858911 | 12q21 | 88487272  | a           | g       | -0.5607 | 0.0895 | 1.48E-09 | ----->    | NA        | ATP2B1,WDR51B,GALNT4               | ATP2B1         | 18686                      |
| LTA-SBP | rs7085     | 15q24 | 72882536  | t           | c       | 0.5665  | 0.0997 | 4.22E-08 | +++++>    | CSK       | CYP1A2,CSK,LMAN1,CPLX3,SCAMP2,ULK3 | CSK            | 21                         |
| LTA-SBP | rs5068     | 1p36  | 11828561  | a           | g       | 1.1766  | 0.1994 | 1.23E-08 | +++++>    | NPPA      | MTHFR,NPPA,CLCN6,NPPB              | NPPA           | 199                        |
| LTA-SBP | rs11105354 | 12q21 | 88550654  | a           | g       | 0.9429  | 0.1186 | 1.69E-14 | +++++>    | ATP2B1    | ATP2B1                             | ATP2B1         | 23321                      |
| LTA-SBP | rs13031603 | 2q24  | 164803435 | a           | c       | -0.582  | 0.0996 | 1.71E-08 | ----->    | NA        | NA                                 | GRB14          | 254143                     |
| LTA-SBP | rs10774625 | 12q24 | 110394602 | a           | g       | 0.5575  | 0.0909 | 3.25E-09 | +++++>    | ATXN2     | SH2B3,ATXN2                        | ATXN2          | 20201                      |
| LTA-SBP | rs862394   | 20q13 | 57132808  | t           | c       | 0.7241  | 0.1271 | 3.80E-08 | +++++>    | NA        | NA                                 | C20orf174      | 66661                      |
| LTA-SBP | rs6092743  | 20q13 | 57133705  | a           | g       | 0.9396  | 0.1449 | 2.25E-08 | +++++>    | NA        | NA                                 | C20orf174      | 65704                      |
| LTA-SBP | rs1720770  | 5p13  | 32859968  | t           | c       | -0.5468 | 0.0911 | 6.93E-09 | ----->    | NA        | C5orf23,NPR3                       | C5orf23        | 29392                      |
| LTA-SBP | rs6712094  | 2q24  | 164751706 | a           | g       | 0.598   | 0.1007 | 9.89E-09 | +++++>    | NA        | NA                                 | GRB14          | 305872                     |
| LTA-SBP | rs35444    | 12q24 | 114038820 | a           | g       | 0.5452  | 0.0929 | 1.47E-08 | +++++>    | NA        | NA                                 | TBX3           | 430466                     |
| LTA-SBP | rs4842666  | 12q21 | 89465680  | t           | c       | 0.8816  | 0.1267 | 1.92E-11 | +++++>    | NA        | ATP2B1,WDR51B,GALNT4               | WDR51B         | 21772                      |
| LTA-SBP | rs1173727  | 5p13  | 32866278  | t           | c       | -0.5439 | 0.0911 | 8.32E-09 | ----->    | NA        | C5orf23,NPR3                       | C5orf23        | 38702                      |
| LTA-SBP | rs17367504 | 1p36  | 11785365  | a           | g       | 0.8355  | 0.1225 | 4.60E-11 | +++++>    | MTHFR     | MTHFR,NPPA,CLCN6,NPPB,AGTRAP       | MTHFR          | 3337                       |
| LTA-SBP | rs13035163 | 2q24  | 164781173 | a           | g       | 0.5775  | 0.0996 | 2.22E-08 | +++++>    | NA        | NA                                 | GRB14          | 276405                     |
| LTA-SBP | rs13035934 | 2q24  | 164781318 | a           | g       | -0.5772 | 0.0996 | 2.25E-08 | ----->    | NA        | NA                                 | GRB14          | 276260                     |
| LTA-SBP | rs12995749 | 2q24  | 164777889 | t           | c       | -0.5795 | 0.0997 | 2.03E-08 | ----->    | NA        | NA                                 | GRB14          | 279889                     |
| LTA-SBP | rs1173747  | 5p13  | 32817909  | a           | c       | 0.512   | 0.0901 | 4.21E-08 | +++++>    | NPR3      | C5orf23,NPR3                       | NPR3           | 5100                       |
| LTA-SBP | rs7136259  | 12q21 | 88605319  | t           | c       | -0.6301 | 0.0902 | 1.60E-11 | ----->    | NA        | ATP2B1                             | ATP2B1         | 31344                      |
| LTA-SBP | rs2681485  | 12q21 | 88549753  | a           | g       | 0.687   | 0.0909 | 2.97E-13 | +++++>    | ATP2B1    | ATP2B1                             | ATP2B1         | 24222                      |
| LTA-SBP | rs1275923  | 2p23  | 26786300  | t           | c       | -0.6048 | 0.0943 | 6.02E-10 | ----->    | KCNK3     | KCNK3,C2orf118                     | KCNK3          | 17178                      |
| LTA-SBP | rs13154066 | 5p13  | 32867427  | t           | c       | -0.5436 | 0.0911 | 8.41E-09 | ----->    | NA        | C5orf23,NPR3                       | C5orf23        | 39851                      |
| LTA-SBP | rs979223   | 2q24  | 164803267 | a           | c       | -0.577  | 0.0995 | 2.23E-08 | ----->    | NA        | NA                                 | GRB14          | 254311                     |
| LTA-SBP | rs1173743  | 5p13  | 32810804  | t           | g       | 0.5212  | 0.0907 | 2.95E-08 | +++++>    | NPR3      | C5orf23,NPR3                       | NPR3           | 12205                      |
| LTA-SBP | rs12258967 | 10p12 | 18767965  | c           | g       | 0.6307  | 0.0976 | 4.53E-10 | +++++>    | CACNB2    | CACNB2                             | CACNB2         | 38447                      |
| LTA-SBP | rs13004226 | 2q24  | 164788924 | c           | g       | -0.5763 | 0.0995 | 2.28E-08 | ----->    | NA        | NA                                 | GRB14          | 268654                     |
| LTA-SBP | rs6100343  | 20q13 | 57133607  | a           | g       | 0.725   | 0.1272 | 3.76E-08 | +++++>    | NA        | NA                                 | C20orf174      | 65862                      |
| LTA-SBP | rs13030081 | 2q24  | 164796086 | t           | c       | 0.5731  | 0.1005 | 3.77E-08 | +++++>    | NA        | NA                                 | GRB14          | 261492                     |
| LTA-SBP | rs12705390 | 7q22  | 106198013 | a           | g       | 0.6307  | 0.11   | 3.17E-08 | +++++>    | NA        | NA                                 | PIK3CG         | 95146                      |
| LTA-SBP | rs2586886  | 2p23  | 26785535  | t           | c       | -0.6016 | 0.0936 | 5.43E-10 | ----->    | KCNK3     | C2orf118,KCNK3                     | KCNK3          | 16413                      |
| LTA-SBP | rs12230074 | 12q21 | 88614998  | a           | g       | 0.934   | 0.1219 | 1.39E-13 | +++++>    | NA        | ATP2B1                             | ATP2B1         | 41023                      |
| LTA-SBP | rs4441488  | 2q24  | 164773873 | t           | c       | 0.5809  | 0.0998 | 1.92E-08 | +++++>    | NA        | NA                                 | GRB14          | 283705                     |
| LTA-SBP | rs11065987 | 12q24 | 110556807 | a           | g       | -0.5274 | 0.0931 | 4.50E-08 | ----->    | NA        | BRAP,ATXN2,ACAD10                  | BRAP           | 9471                       |
| LTA-SBP | rs936226   | 15q24 | 72856335  | t           | c       | -0.5733 | 0.1004 | 3.58E-08 | ----->    | NA        | CYP1A2,CYP1A1,CSK,LMAN1,CPLX3,ULK3 | CSK            | 5432                       |
| LTA-SBP | rs6707357  | 2q24  | 164722539 | t           | c       | -0.5232 | 0.0914 | 3.29E-08 | ----->    | NA        | NA                                 | GRB14          | 335039                     |
| LTA-SBP | rs880315   | 1p36  | 10719453  | t           | c       | -0.7125 | 0.1005 | 7.98E-12 | ----->    | CASZ1     | CASZ1                              | CASZ1          | 59841                      |
| LTA-SBP | rs2168122  | 10q21 | 63193080  | t           | c       | -0.6435 | 0.1137 | 4.75E-08 | ----->    | C10orf107 | C10orf107                          | C10orf107      | 3015                       |
| LTA-SBP | rs653178   | 12q24 | 110492139 | t           | c       | -0.5508 | 0.0902 | 3.76E-09 | ----->    | ATXN2     | ATXN2                              | ATXN2          | 29724                      |
| LTA-SBP | rs13034053 | 2q24  | 164784845 | a           | t       | -0.5762 | 0.0996 | 2.34E-08 | ----->    | NA        | NA                                 | GRB14          | 272933                     |
| LTA-SBP | rs4842667  | 12q21 | 89490785  | a           | g       | 0.5579  | 0.0984 | 1.89E-09 | +++++>    | NA        | ATP2B1,WDR51B,GALNT4               | ATP2B1         | 15173                      |
| LTA-SBP | rs284277   | 1p36  | 10713384  | a           | c       | -0.7091 | 0.1044 | 5.54E-11 | ----->    | CASZ1     | CASZ1                              | ATP2B1         | 65910                      |
| LTA-SBP | rs1275982  | 2p23  | 26772593  | t           | c       | -0.5881 | 0.0919 | 6.56E-10 | ----->    | KCNK3     | KCNK3,CIB4                         | KCNK3          | 3471                       |
| LTA-SBP | rs6100342  | 20q13 | 57132656  | a           | c       | -0.7232 | 0.127  | 3.89E-08 | ----->    | NA        | NA                                 | C20orf174      | 66813                      |
| LTA-SBP | rs1072518  | 15q24 | 73021663  | t           | c       | 0.5692  | 0.0947 | 6.54E-09 | +++++>    | NA        | COX5A,SCAMP5,PPP25,C15orf17,MPI    | COX5A          | 4238                       |
| LTA-SBP | rs1401982  | 12q21 | 88513730  | a           | g       | 0.6828  | 0.0906 | 3.59E-13 | +++++>    | ATP2B1    | ATP2B1                             | ATP2B1         | 7772                       |
| LTA-SBP | rs998981   | 20q13 | 57133036  | t           | c       | 0.7246  | 0.1271 | 3.78E-08 | +++++>    | NA        | NA                                 | C20orf174      | 66433                      |
| LTA-SBP | rs2070759  | 12q21 | 88541867  | t           | g       | 0.5881  | 0.0902 | 3.19E-10 | +++++>    | ATP2B1    | ATP2B1                             | ATP2B1         | 32108                      |
| LTA-SBP | rs12442901 | 15q24 | 72870965  | a           | g       | 0.5675  | 0.1    | 4.34E-08 | +++++>    | CSK       | CPLX3,CYP1A2,SCAMP2,CSK,ULK3,LMAN1 | CSK            | 9198                       |
| LTA-SBP | rs11014049 | 10p12 | 18726458  | a           | g       | -0.5453 | 0.0964 | 4.77E-08 | ----->    | CACNB2    | CACNB2                             | CACNB2         | 3060                       |
| LTA-SBP | rs13006561 | 1p36  | 11788391  | a           | g       | 0.8795  | 0.1235 | 6.38E-12 | +++++>    | MTHFR     | MTHFR,NPPA,CLCN6,NPPB,AGTRAP       | MTHFR          | 311                        |
| LTA-SBP | rs1439214  | 2q24  | 164778248 | t           | c       | -0.5791 | 0.0997 | 2.07E-08 | ----->    | NA        | NA                                 | GRB14          | 279330                     |
| LTA-SBP | rs2681492  | 12q21 | 88537220  | t           | c       | 0.8967  | 0.1156 | 7.18E-14 | +++++>    | ATP2B1    | ATP2B1                             | ATP2B1         | 31262                      |
| LTA-SBP | rs2168519  | 15q24 | 72867925  | t           | c       | 0.5679  | 0.0999 | 4.18E-08 | +++++>    | CSK       | CYP1A2,CSK,LMAN1,CPLX3,SCAMP2,ULK3 | CSK            | 6158                       |
| LTA-SBP | rs1275977  | 2p23  | 26776359  | a           | g       | -0.5862 | 0.099  | 1.11E-08 | ----->    | KCNK3     | KCNK3,CIB4                         | KCNK3          | 7237                       |
| LTA-SBP | rs492945   | 1p36  | 10723185  | a           | g       | -0.5838 | 0.1005 | 2.10E-08 | ----->    | CASZ1     | CASZ1                              | CASZ1          | 56109                      |
| LTA-SBP | rs13027527 | 2q24  | 164786950 | a           | g       | -0.5768 | 0.0995 | 2.19E-08 | ----->    | NA        | NA                                 | GRB14          | 270628                     |
| LTA-SBP | rs11105364 | 12q21 | 88593407  | t           | g       | 0.9382  | 0.1197 | 3.81E-14 | +++++>    | NA        | ATP2B1                             | ATP2B1         | 19432                      |
| LTA-SBP | rs13021222 | 2q24  | 164756151 | c           | g       | -0.5902 | 0.1008 | 1.60E-08 | ----->    | NA        | NA                                 | GRB14          | 301427                     |
| LTA-SBP | rs12579302 | 12q21 | 88574634  | a           | g       | 0.9342  | 0.1194 | 4.31E-14 | +++++>    | NA        | ATP2B1                             | ATP2B1         | 659                        |
| LTA-SBP | rs35441    | 12q24 | 114037498 | t           | c       | -0.5471 | 0.0933 | 1.54E-08 | ----->    | NA        | NA                                 | TBX3           | 431146                     |
| LTA-SBP | rs17376328 | 1p36  | 11799249  | a           | g       | -1.1341 | 0.1958 | 2.26E-08 | ----->    | CLCN6     | MTHFR,NPPA,CLCN6,NPPB              | CLCN6          | 10456                      |
| LTA-SBP | rs9292468  | 5p13  | 32854830  | t           | c       | -0.5451 | 0.0911 | 7.76E-09 | ----->    | NA        | C5orf23,NPR3                       | C5orf23        | 27254                      |
| LTA-SBP | rs13005481 | 2q24  | 164789612 | t           | c       | -0.5758 | 0.0995 | 2.35E-08 | ----->    | NA        | NA                                 | GRB14          | 267966                     |
| LTA-SBP | rs4766578  | 12q24 | 110388754 | a           | t       | -0.5599 | 0.0909 | 2.82E-09 | ----->    | ATXN2     | SH2B3,ATXN2                        | ATXN2          | 14353                      |
| LTA-SBP | rs17477177 | 7q22  | 106199094 | t           | c       | -0.6322 | 0.1106 | 3.46E-08 | ----->    | NA        | NA                                 | PIK3CG         | 94065                      |
| LTA-SBP | rs11105383 | 12q21 | 88631437  | t           | c       | 0.7644  | 0.1329 | 2.83E-08 | +++++>    | NA        | ATP2B1                             | ATP2B1         | 57462                      |
| LTA-SBP | rs4548524  | 10p12 | 18756873  | a           | g       | 0.544   | 0.0935 | 1.97E-08 | +++++>    | CACNB2    | CACNB2                             | CACNB2         | 27355                      |
| LTA-SBP | rs1275988  | 2p23  | 26767868  | t           | c       | -0.6004 | 0.0917 | 2.61E-10 | ----->    | NA        | KCNK3,CIB4                         | KCNK3          | 1254                       |
| LTA-SBP | rs2301249  | 15q24 | 72879437  | t           | c       | 0.566   | 0.0996 | 4.13E-08 | +++++>    | CSK       | CPLX3,CYP1A2,SCAMP2,CSK,ULK3,LMAN1 | CSK            | 3120                       |
| LTA-SBP | rs6726740  | 2q24  | 164758374 | t           | c       | 0.5849  | 0.1008 | 2.15E-08 | +++++>    | NA        | NA                                 | GRB14          | 299204                     |
| LTA-SBP | rs11687999 | 2q24  | 164774604 | t           | c       | 0.5809  | 0.0998 | 1.92E-08 | +++++>    | NA        | NA                                 | GRB14          | 282974                     |
| LTA-SBP | rs7299436  | 12q21 | 88637201  | t           | g       | 0.7672  | 0.1334 | 2.84E-08 | +++++>    | NA        | NA                                 | ATP2B1         | 83226                      |
| LTA-SBP | rs6100340  | 20q13 | 57118007  | a           | g       | -0.7158 | 0.1261 | 4.31E-08 | ----->    | NA        | NA                                 | SLMO2          | 66711                      |

| Trait   | SNPID       | Chr   | Position  | Bui Allele1 | Allele2 | Beta    | s.e.   | P        | Direction | InRefGene | RefGenes 60kbfromSNP                                                                     | ClosestRefGene | DistanceFromClosestRefGene |
|---------|-------------|-------|-----------|-------------|---------|---------|--------|----------|-----------|-----------|------------------------------------------------------------------------------------------|----------------|----------------------------|
| LTA-SBP | rs8033381   | 15q24 | 72867738  | a           | g       | -0.5689 | 0.1    | 3.97E-08 | -----     | CSK       | CPLX3,CYP1A2,SCAMP2,CSK,ULK3,LMAN1L                                                      | CSK            | 5971                       |
| LTA-SBP | rs12995799  | 2q24  | 164798636 | t           | c       | 0.5788  | 0.0996 | 2.03E-08 | ++++++    | NA        | NA                                                                                       | GRB14          | 258942                     |
| LTA-SBP | rs12046278  | 1p36  | 10722164  | t           | c       | -0.707  | 0.1039 | 5.12E-11 | -----?    | CASZ1     | CASZ1                                                                                    | CASZ1          | 57130                      |
| LTA-SBP | rs11891401  | 2q24  | 164794993 | a           | t       | -0.5844 | 0.0997 | 1.56E-08 | -----     | NA        | NA                                                                                       | GRB14          | 262585                     |
| LTA-SBP | rs7070797   | 10q21 | 63221779  | a           | g       | -0.7415 | 0.1306 | 4.30E-08 | -----     | NA        | C10orf107                                                                                | C10orf107      | 25684                      |
| LTA-SBP | rs4886629   | 15q24 | 72859611  | c           | g       | -0.5728 | 0.1004 | 3.63E-08 | -----     | NA        | CPLX3,CYP1A2,CYP1A1,CSK,ULK3,LMAN1L                                                      | CSK            | 2156                       |
| LTA-SBP | rs7733331   | 5p13  | 32864603  | t           | c       | -0.5505 | 0.0911 | 5.38E-09 | -----     | NA        | C5orf23,NPR3                                                                             | C5orf23        | 37027                      |
| LTA-SBP | rs4845953   | 1p36  | 10724576  | a           | g       | -0.5626 | 0.0995 | 4.84E-08 | -----?    | CASZ1     | CASZ1                                                                                    | CASZ1          | 54718                      |
| LTA-SBP | rs12656497  | 5p13  | 32867696  | t           | c       | -0.5432 | 0.0911 | 8.73E-09 | -----     | NA        | C5orf23,NPR3                                                                             | C5orf23        | 40120                      |
| LTA-SBP | rs17249754  | 12q21 | 88584717  | a           | g       | -0.9384 | 0.1194 | 3.37E-14 | -----     | NA        | ATP2B1                                                                                   | ATP2B1         | 10742                      |
| LTA-SBP | rs1485537   | 20q13 | 57131415  | t           | c       | 0.7232  | 0.127  | 3.86E-08 | ++++++    | NA        | NA                                                                                       | C20orf174      | 68054                      |
| LTA-SBP | rs11105382  | 12q21 | 88631403  | t           | c       | 0.7637  | 0.1326 | 2.73E-08 | ++++++    | NA        | ATP2B1                                                                                   | ATP2B1         | 57428                      |
| LTA-SBP | rs1275985   | 2p23  | 26765249  | t           | c       | -0.596  | 0.092  | 4.01E-10 | -----     | NA        | KCNK3,CIB4                                                                               | KCNK3          | 3873                       |
| LTA-SBP | rs1173771   | 5p13  | 32850795  | a           | g       | -0.5502 | 0.0911 | 5.63E-09 | -----     | NA        | C5orf23,NPR3                                                                             | C5orf23        | 23209                      |
| LTA-SBP | rs35432     | 12q24 | 114039913 | t           | c       | -0.5535 | 0.0845 | 1.58E-08 | -----     | NA        | NA                                                                                       | TBX3           | 433561                     |
| LTA-SBP | rs10858915  | 12q21 | 88575678  | a           | g       | 0.5191  | 0.0903 | 2.92E-08 | ++++++    | NA        | ATP2B1                                                                                   | ATP2B1         | 1703                       |
| LTA-SBP | rs1439211   | 2q24  | 164802546 | a           | c       | -0.5887 | 0.1035 | 4.06E-08 | -----     | NA        | NA                                                                                       | GRB14          | 255032                     |
| LTA-SBP | rs2050265   | 1p36  | 11802286  | a           | g       | 0.8509  | 0.1222 | 1.84E-11 | ++++++    | CLCN6     | MTHFR,NPPA,CLCN6,NPPB                                                                    | CLCN6          | 8576                       |
| LTA-SBP | rs11014166  | 10p12 | 18748804  | a           | t       | 0.5638  | 0.0939 | 6.88E-09 | ++++++    | CACNB2    | CACNB2                                                                                   | CACNB2         | 19286                      |
| LTA-SBP | rs10774792  | 12q24 | 114036981 | t           | c       | -0.5502 | 0.094  | 1.63E-08 | -----     | NA        | NA                                                                                       | TBX3           | 430629                     |
| LTA-SBP | rs1173756   | 5p13  | 32825609  | t           | c       | -0.5175 | 0.0896 | 2.52E-08 | -----     | C5orf23   | C5orf23,NPR3                                                                             | C5orf23        | 908                        |
| LTA-SBP | rs1275980   | 2p23  | 26770473  | t           | c       | -0.5947 | 0.0919 | 4.18E-10 | -----     | NA        | KCNK3,CIB4                                                                               | KCNK3          | 1351                       |
| LTA-SBP | rs1813353   | 10p12 | 18747454  | t           | c       | 0.623   | 0.0968 | 5.31E-10 | ++++++    | CACNB2    | CACNB2                                                                                   | CACNB2         | 17936                      |
| LTA-SBP | rs6676300   | 1p36  | 11847887  | a           | g       | 0.5541  | 0.0942 | 1.40E-08 | ++++++    | NA        | MTHFR,KIAA2013,NPPA,CLCN6,NPPB                                                           | NPPB           | 6308                       |
| LTA-SBP | rs12567136  | 1p36  | 11806318  | t           | c       | -0.8529 | 0.1222 | 1.63E-11 | -----     | CLCN6     | MTHFR,NPPA,CLCN6,NPPB                                                                    | CLCN6          | 4544                       |
| LTA-SBP | rs2681472   | 12q21 | 88533090  | a           | g       | 0.9457  | 0.118  | 1.04E-14 | ++++++    | ATP2B1    | ATP2B1                                                                                   | ATP2B1         | 27132                      |
| LTA-SBP | rs17037425  | 1p36  | 11792970  | a           | g       | -0.8574 | 0.1292 | 1.51E-10 | -----     | CLCN6     | MTHFR,NPPA,CLCN6,NPPB,AGTRAP                                                             | CLCN6          | 4177                       |
| LTA-SBP | rs1371181   | 2q24  | 164784974 | t           | c       | 0.5764  | 0.0995 | 2.28E-08 | ++++++    | NA        | NA                                                                                       | GRB14          | 272604                     |
| LTA-SBP | rs10432461  | 2q24  | 164772752 | a           | t       | -0.5812 | 0.0998 | 1.93E-08 | -----     | NA        | NA                                                                                       | GRB14          | 284826                     |
| LTA-SBP | rs3184504   | 12q24 | 110368991 | t           | c       | 0.5549  | 0.0903 | 3.04E-09 | ++++++    | SH2B3     | SH2B3,ATXN2                                                                              | SH2B3          | 4818                       |
| LTA-SBP | rs11105368  | 12q21 | 88598572  | c           | g       | -0.9371 | 0.1197 | 4.21E-14 | -----     | NA        | ATP2B1                                                                                   | ATP2B1         | 24597                      |
| LTA-SBP | rs13007966  | 2q24  | 164784819 | t           | c       | -0.5762 | 0.0996 | 2.33E-08 | -----     | NA        | NA                                                                                       | GRB14          | 272759                     |
| LTA-SBP | rs11105378  | 12q21 | 88614872  | t           | c       | -0.9344 | 0.1216 | 1.23E-13 | -----     | NA        | ATP2B1                                                                                   | ATP2B1         | 40897                      |
| LTA-SBP | rs11105328  | 12q21 | 88466521  | a           | g       | 0.8655  | 0.1239 | 1.57E-11 | ++++++    | NA        | ATP2B1,WDR51B,GALNT4                                                                     | WDR51B         | 22613                      |
| LTA-SBP | rs1898841   | 2q24  | 164778453 | t           | c       | 0.5785  | 0.0997 | 2.12E-08 | ++++++    | NA        | NA                                                                                       | GRB14          | 279125                     |
| LTA-SBP | rs11105379  | 12q21 | 88619304  | t           | c       | 0.7704  | 0.1325 | 2.03E-08 | ++++++    | NA        | ATP2B1                                                                                   | ATP2B1         | 45329                      |
| LTA-SBP | rs11105358  | 12q21 | 88566273  | c           | g       | -0.6895 | 0.0911 | 2.77E-13 | -----     | ATP2B1    | ATP2B1                                                                                   | ATP2B1         | 7702                       |
| LTA-SBP | rs17037390  | 1p36  | 11783430  | a           | g       | -0.8558 | 0.1226 | 1.60E-11 | -----     | MTHFR     | MTHFR,NPPA,CLCN6,NPPB,AGTRAP                                                             | MTHFR          | 5272                       |
| LTA-SBP | rs1173766   | 5p13  | 32840285  | t           | c       | -0.5294 | 0.0917 | 2.52E-08 | -----     | NA        | C5orf23,NPR3                                                                             | C5orf23        | 12709                      |
| LTA-SBP | rs11014171  | 10p12 | 18751201  | t           | c       | -0.5679 | 0.0937 | 4.97E-09 | -----     | CACNB2    | CACNB2                                                                                   | CACNB2         | 21683                      |
| LTA-DBP | rs11072512  | 15q24 | 72991079  | t           | c       | -0.3193 | 0.0525 | 5.53E-09 | -----     | NA        | COX5A,SCAMP2,RPP25,C15orf17,MPI                                                          | C15orf17       | 4564                       |
| LTA-DBP | rs7495739   | 15q24 | 72972723  | a           | g       | 0.3158  | 0.0524 | 7.78E-09 | ++++++    | MPI       | COX5A,SCAMP2,C15orf17,MPI,ULK3                                                           | MPI            | 3261                       |
| LTA-DBP | rs7537765   | 1p36  | 11808990  | a           | g       | 0.4718  | 0.0714 | 2.36E-10 | ++++++    | CLCN6     | MTHFR,NPPA,CLCN6,NPPB                                                                    | CLCN6          | 972                        |
| LTA-DBP | rs79085     | 15q24 | 7282536   | t           | c       | 0.3489  | 0.0582 | 1.10E-08 | ++++++    | CSK       | CYP1A2,CSK,LMAN1L,CPLX3,SCAMP2,ULK3                                                      | CSK            | 21                         |
| LTA-DBP | rs198833    | 6p22  | 26222487  | a           | g       | -0.4345 | 0.0741 | 1.91E-08 | -----     | NA        | HIST1H1T,HIST1H2B,HIST1H2C,HIST1H1E,HFE,HIST1H1C,HIST1H4C,HIST1H2AC                      | HIST1H1T       | 6144                       |
| LTA-DBP | rs8495127   | 15q24 | 72981543  | t           | c       | -0.3262 | 0.0571 | 4.40E-08 | -----     | C15orf17  | COX5A,MPI,SCAMP2,RPP25,C15orf17,ULK3                                                     | C15orf17       | 2163                       |
| LTA-DBP | rs11105354  | 12q21 | 88550654  | a           | g       | 0.5235  | 0.0696 | 5.40E-13 | ++++++    | ATP2B1    | ATP2B1                                                                                   | ATP2B1         | 23321                      |
| LTA-DBP | rs12246717  | 10q21 | 63129189  | t           | g       | 0.3693  | 0.0624 | 1.39E-08 | ++++++    | C10orf107 | C10orf107                                                                                | C10orf107      | 36465                      |
| LTA-DBP | rs10774625  | 12q24 | 110394602 | a           | g       | 0.3848  | 0.0528 | 2.74E-12 | ++++++    | ATXN2     | SH2B3,ATXN2                                                                              | ATXN2          | 20201                      |
| LTA-DBP | rs68092743  | 20q13 | 57133765  | t           | g       | 0.502   | 0.0843 | 1.11E-08 | ++++++    | NA        | NA                                                                                       | C20orf174      | 65704                      |
| LTA-DBP | rs11634474  | 15q24 | 72903237  | c           | g       | 0.3394  | 0.0593 | 4.51E-08 | ++++++    | LMAN1L    | CSK,LMAN1L,CPLX3,SCAMP2,ULK3                                                             | LMAN1L         | 1914                       |
| LTA-DBP | rs4886636   | 15q24 | 72983229  | a           | g       | -0.3123 | 0.0524 | 1.13E-08 | -----     | C15orf17  | COX5A,MPI,SCAMP2,RPP25,C15orf17                                                          | C15orf17       | 3286                       |
| LTA-DBP | rs3784789   | 15q24 | 72869605  | c           | g       | 0.3166  | 0.0553 | 3.98E-08 | ++++++    | CSK       | CYP1A2,CSK,LMAN1L,CPLX3,SCAMP2,ULK3                                                      | CSK            | 7838                       |
| LTA-DBP | rs4842666   | 12q21 | 88465680  | t           | c       | 0.5108  | 0.0745 | 4.88E-11 | ++++++    | NA        | ATP2B1,WDR51B,GALNT4                                                                     | WDR51B         | 21772                      |
| LTA-DBP | rs17367504  | 1p36  | 11785365  | a           | g       | 0.4598  | 0.0717 | 7.61E-10 | ++++++    | MTHFR     | MTHFR,NPPA,CLCN6,NPPB,AGTRAP                                                             | MTHFR          | 3337                       |
| LTA-DBP | rs11072511  | 15q24 | 72946486  | a           | g       | 0.3165  | 0.0525 | 7.35E-09 | ++++++    | SCAMP2    | COX5A,MPI,LMAN1L,CPLX3,SCAMP2,C15orf17,ULK3                                              | SCAMP2         | 6237                       |
| LTA-DBP | rs17696736  | 12q24 | 110971201 | a           | g       | -0.3131 | 0.0536 | 2.16E-08 | -----     | C12orf30  | ERP29,TMEM116,C12orf30                                                                   | C12orf30       | 22325                      |
| LTA-DBP | rs7136259   | 12q21 | 88605319  | t           | c       | -0.3314 | 0.0526 | 1.55E-09 | -----     | NA        | ATP2B1                                                                                   | ATP2B1         | 31344                      |
| LTA-DBP | rs2681485   | 12q21 | 88549753  | a           | g       | 0.3385  | 0.053  | 9.22E-10 | ++++++    | ATP2B1    | ATP2B1                                                                                   | ATP2B1         | 24222                      |
| LTA-DBP | rs1799945   | 6p22  | 26199158  | c           | g       | -0.4226 | 0.074  | 4.33E-08 | -----     | HFE       | HIST1H2BC,HIST1H1C,HIST1H3B,HIST1H4C,HIST1H2BB,HIST1H2AC,HIST1H1T,HIST1H2AB,HFE,HIST1H3C | HFE            | 3671                       |
| LTA-DBP | rs2120702   | 10q21 | 63192664  | a           | t       | -0.3402 | 0.0592 | 3.56E-08 | -----     | C10orf107 | C10orf107                                                                                | C10orf107      | 3431                       |
| LTA-DBP | rs12258967  | 10p12 | 18767965  | c           | g       | 0.3548  | 0.0571 | 2.48E-09 | ++++++    | CACNB2    | CACNB2                                                                                   | CACNB2         | 38447                      |
| LTA-DBP | rs168916504 | 10q21 | 63122962  | a           | g       | 0.3706  | 0.0625 | 1.30E-08 | ++++++    | C10orf107 | C10orf107                                                                                | C10orf107      | 30238                      |
| LTA-DBP | rs6495126   | 15q24 | 72962079  | a           | g       | 0.3253  | 0.0568 | 4.03E-08 | ++++++    | NA        | COX5A,MPI,LMAN1L,CPLX3,SCAMP2,C15orf17,ULK3                                              | MPI            | 7383                       |
| LTA-DBP | rs7599598   | 2q11  | 98715567  | a           | g       | -0.314  | 0.0543 | 1.91E-08 | -----     | NA        | FLJ10081,FER1L5,LMAN2L                                                                   | FER1L5         | 9353                       |
| LTA-DBP | rs12230074  | 12q21 | 88614998  | a           | g       | 0.5255  | 0.0718 | 2.23E-12 | ++++++    | NA        | ATP2B1                                                                                   | ATP2B1         | 41023                      |
| LTA-DBP | rs11066188  | 12q24 | 111095097 | a           | g       | 0.3343  | 0.0539 | 2.76E-09 | ++++++    | NA        | TRAFD1                                                                                   | TRAFD1         | 19302                      |
| LTA-DBP | rs1378941   | 15q24 | 72867203  | a           | g       | -0.3135 | 0.0551 | 4.98E-08 | -----     | CSK       | CYP1A2,CSK,LMAN1L,CPLX3,SCAMP2,ULK3                                                      | CSK            | 5436                       |
| LTA-DBP | rs11065987  | 12q24 | 110556807 | a           | g       | -0.3534 | 0.0543 | 4.52E-10 | -----     | NA        | BRAP,ATXN2,ACAD10                                                                        | BRAP           | 9471                       |
| LTA-DBP | rs936226    | 15q24 | 72865335  | t           | c       | -0.3413 | 0.0585 | 2.26E-08 | -----     | NA        | CYP1A2,CYP1A1,CSK,LMAN1L,CPLX3,ULK3                                                      | CSK            | 5432                       |
| LTA-DBP | rs2166122   | 10q21 | 63193080  | t           | c       | -0.3932 | 0.0663 | 1.32E-08 | -----     | C10orf107 | C10orf107                                                                                | C10orf107      | 3015                       |
| LTA-DBP | rs653178    | 12q24 | 110492139 | t           | c       | -0.3911 | 0.0524 | 7.85E-13 | -----     | ATXN2     | ATXN2                                                                                    | ATXN2          | 29724                      |
| LTA-DBP | rs1378942   | 15q24 | 72864420  | a           | c       | -0.3128 | 0.055  | 5.00E-08 | -----     | CSK       | CYP1A2,CYP1A1,CSK,LMAN1L,CPLX3,SCAMP2,ULK3                                               | CSK            | 2653                       |
| LTA-DBP | rs11066320  | 12q24 | 111390789 | a           | g       | 0.303   | 0.053  | 4.11E-08 | ++++++    | PTPN11    | RPL6,PTPN11                                                                              | PTPN11         | 41301                      |
| LTA-DBP | rs2678612   | 10q21 | 63193272  | t           | c       | -0.3502 | 0.0593 | 1.47E-08 | -----     | C10orf107 | C10orf107                                                                                | C10orf107      | 2923                       |
| LTA-DBP | rs765606    | 15q24 | 72927907  | a           | g       | -0.3388 | 0.0563 | 7.81E-09 | -----     | SCAMP2    | CPLX3,SCAMP2,C15orf17,MPI,CSK,ULK3,LMAN1L                                                | SCAMP2         | 3658                       |
| LTA-DBP | rs280014    | 20q13 | 57192854  | t           | c       | -0.4584 | 0.0782 | 1.92E-08 | -----     | NA        | C20orf                                                                                   |                |                            |



| Trait   | SNPID      | Chr   | Position,Bui | Allele1 | Allele2 | Beta    | s.e.   | P        | Direction | InRefGene | RefGenes.60kbfromSNP                                                           | ClosestRefGene | DistanceFromClosestRefGene |
|---------|------------|-------|--------------|---------|---------|---------|--------|----------|-----------|-----------|--------------------------------------------------------------------------------|----------------|----------------------------|
| LTA-DBP | rs1401982  | 12q21 | 88513730     | a       | g       | 0.3363  | 0.0529 | 1.06E-09 | ++++++    | ATP2B1    | ATP2B1                                                                         | ATP2B1         | 7772                       |
| LTA-DBP | rs11630918 | 15q24 | 72942949     | t       | c       | -0.3242 | 0.0537 | 7.28E-09 | -----     | SCAMP2    | COX5A,MPI,LMAN1L,CPLX3,SCAMP2,C15orf17,ULK3                                    | SCAMP2         | 9774                       |
| LTA-DBP | rs12442901 | 15q24 | 72870965     | a       | g       | 0.3399  | 0.0583 | 2.30E-08 | ++++++    | CSK       | CPLX3,CYP1A2,SCAMP2,CSK,ULK3,LMAN1L                                            | CSK            | 9198                       |
| LTA-DBP | rs13006561 | 1p36  | 11788391     | a       | g       | 0.4789  | 0.0723 | 2.08E-10 | ++++++    | MTHFR     | MTHFR,NPPA,CLCN6,NPPB,AGTRAP                                                   | MTHFR          | 311                        |
| LTA-DBP | rs11072513 | 15q24 | 73008021     | t       | c       | -0.3223 | 0.0526 | 4.20E-09 | -----     | COX5A     | COX5A,MPI,SCAMP2,RPP25,C15orf17                                                | COX5A          | 8350                       |
| LTA-DBP | rs2681492  | 12q21 | 88537220     | t       | c       | 0.5064  | 0.0676 | 7.02E-13 | ++++++    | ATP2B1    | ATP2B1                                                                         | ATP2B1         | 31262                      |
| LTA-DBP | rs2168519  | 15q24 | 72867925     | t       | c       | 0.3402  | 0.0583 | 2.19E-08 | ++++++    | CSK       | CYP1A2,CSK,LMAN1L,CPLX3,SCAMP2,ULK3                                            | CSK            | 6158                       |
| LTA-DBP | rs2393833  | 10q21 | 63115322     | t       | c       | -0.3697 | 0.0624 | 1.36E-08 | -----     | C10orf107 | C10orf107                                                                      | C10orf107      | 22598                      |
| LTA-DBP | rs2004776  | 1q42  | 228915325    | t       | c       | 0.3545  | 0.0615 | 3.20E-08 | ++++++    | AGT       | AGT;COG2,CAPIN9                                                                | AGT            | 1239                       |
| LTA-DBP | rs4886633  | 15q24 | 72965260     | a       | g       | -0.3276 | 0.057  | 3.49E-08 | -----     | NA        | COX5A,CPLX3,SCAMP2,C15orf17,MPI,ULK3                                           | MPI            | 4202                       |
| LTA-DBP | rs11856413 | 15q24 | 72968945     | a       | g       | 0.3183  | 0.0525 | 5.94E-09 | ++++++    | NA        | COX5A,SCAMP2,RPP25,C15orf17,MPI                                                | C15orf17       | 430                        |
| LTA-DBP | rs1133322  | 15q24 | 72969410     | a       | g       | 0.3205  | 0.0526 | 4.96E-09 | ++++++    | NA        | COX5A,MPI,SCAMP2,RPP25,C15orf17                                                | COX5A          | 261                        |
| LTA-DBP | rs11105364 | 12q21 | 88593407     | t       | g       | 0.5264  | 0.0704 | 7.24E-13 | ++++++    | NA        | ATP2B1                                                                         | ATP2B1         | 19432                      |
| LTA-DBP | rs12579302 | 12q21 | 88574634     | a       | g       | 0.5219  | 0.0702 | 1.01E-12 | ++++++    | NA        | ATP2B1                                                                         | ATP2B1         | 659                        |
| LTA-DBP | rs12244842 | 10q21 | 63109192     | t       | g       | -0.3784 | 0.0627 | 7.05E-09 | -----     | C10orf107 | C10orf107                                                                      | C10orf107      | 16488                      |
| LTA-DBP | rs4766578  | 12q24 | 110398754    | a       | t       | -0.3848 | 0.0529 | 2.71E-12 | -----     | ATXN2     | SH2B3,ATXN2                                                                    | ATXN2          | 14353                      |
| LTA-DBP | rs11105383 | 12q21 | 88631437     | t       | c       | 0.4525  | 0.0776 | 2.28E-08 | ++++++    | NA        | ATP2B1                                                                         | ATP2B1         | 57462                      |
| LTA-DBP | rs1992625  | 10q21 | 63190704     | t       | c       | -0.3911 | 0.0662 | 1.48E-08 | -----     | C10orf107 | C10orf107                                                                      | C10orf107      | 5391                       |
| LTA-DBP | rs1133323  | 15q24 | 72969278     | t       | c       | -0.3262 | 0.0526 | 2.66E-09 | -----     | NA        | COX5A,MPI,SCAMP2,RPP25,C15orf17                                                | COX5A          | 393                        |
| LTA-DBP | rs1378940  | 15q24 | 72870547     | a       | c       | -0.3159 | 0.0554 | 4.44E-08 | -----     | CSK       | CPLX3,CYP1A2,SCAMP2,CSK,ULK3,LMAN1L                                            | CSK            | 8780                       |
| LTA-DBP | rs2301249  | 15q24 | 72879437     | t       | c       | 0.3479  | 0.0581 | 9.48E-09 | ++++++    | CSK       | CPLX3,CYP1A2,SCAMP2,CSK,ULK3,LMAN1L                                            | CSK            | 3120                       |
| LTA-DBP | rs1127796  | 15q24 | 72960057     | t       | c       | 0.3152  | 0.0525 | 8.37E-09 | ++++++    | C15orf17  | COX5A,SCAMP2,RPP25,C15orf17,MPI,ULK3                                           | C15orf17       | 6771                       |
| LTA-DBP | rs7497393  | 15q24 | 72962510     | c       | g       | -0.3172 | 0.0524 | 6.62E-09 | -----     | NA        | COX5A,MPI,LMAN1L,CPLX3,SCAMP2,C15orf17,ULK3                                    | MPI            | 6952                       |
| LTA-DBP | rs7299436  | 12q21 | 88637201     | t       | g       | 0.4541  | 0.0779 | 2.30E-08 | ++++++    | NA        | NA                                                                             | ATP2B1         | 63226                      |
| LTA-DBP | rs1762232  | 15q24 | 72902948     | a       | g       | -0.3388 | 0.0593 | 4.35E-08 | -----     | LMAN1L    | CPLX3,SCAMP2,CSK,ULK3,LMAN1L                                                   | LMAN1L         | 2203                       |
| LTA-DBP | rs198846   | 6p22  | 26215442     | a       | g       | 0.4337  | 0.0738 | 1.73E-08 | ++++++    | NA        | HIST1H2BD,HIST1H2BC,HIST1H1E,HIST1H1C,HIST1H4C,HIST1H2AC,HIST1H1T,HFE          | HIST1H1T       | 177                        |
| LTA-DBP | rs8033381  | 15q24 | 72867738     | a       | g       | -0.3403 | 0.0583 | 2.17E-08 | -----     | CSK       | CPLX3,CYP1A2,SCAMP2,CSK,ULK3,LMAN1L                                            | CSK            | 5971                       |
| LTA-DBP | rs260013   | 20q13 | 57194118     | a       | g       | -0.4565 | 0.0783 | 2.31E-08 | -----     | NA        | C20orf174                                                                      | C20orf174      | 5351                       |
| LTA-DBP | rs3750727  | 10q21 | 63114411     | a       | g       | 0.3782  | 0.0626 | 7.09E-09 | ++++++    | C10orf107 | C10orf107                                                                      | C10orf107      | 21687                      |
| LTA-DBP | rs7070797  | 10q21 | 63221779     | a       | g       | -0.4387 | 0.0761 | 3.30E-08 | -----     | C10orf107 | C10orf107                                                                      | C10orf107      | 25684                      |
| LTA-DBP | rs4886629  | 15q24 | 72859611     | c       | g       | -0.341  | 0.0585 | 2.29E-08 | -----     | NA        | CPLX3,CYP1A2,CYP1A1,CSK,ULK3,LMAN1L                                            | CSK            | 2156                       |
| LTA-DBP | rs17249754 | 12q21 | 88584717     | a       | g       | -0.5256 | 0.0702 | 7.08E-13 | -----     | NA        | ATP2B1                                                                         | ATP2B1         | 10742                      |
| LTA-DBP | rs11105382 | 12q21 | 88631403     | t       | c       | 0.4519  | 0.0774 | 2.21E-08 | ++++++    | NA        | ATP2B1                                                                         | ATP2B1         | 57428                      |
| LTA-DBP | rs936230   | 15q24 | 72932151     | t       | c       | 0.3335  | 0.0586 | 4.98E-08 | ++++++    | SCAMP2    | MPI,CSK,LMAN1L,CPLX3,SCAMP2,C15orf17,ULK3                                      | SCAMP2         | 7902                       |
| LTA-DBP | rs11066301 | 12q24 | 111355755    | a       | g       | -0.304  | 0.0532 | 4.18E-08 | -----     | PTPN11    | RPL6,PTPN11                                                                    | PTPN11         | 14837                      |
| LTA-DBP | rs2588992  | 10q21 | 63184677     | t       | c       | -0.3768 | 0.066  | 4.41E-08 | -----     | C10orf107 | C10orf107                                                                      | C10orf107      | 11418                      |
| LTA-DBP | rs1130741  | 15q24 | 72976983     | a       | g       | 0.3154  | 0.0525 | 8.20E-09 | ++++++    | MPI       | COX5A,SCAMP2,RPP25,C15orf17,MPI,ULK3                                           | MPI            | 635                        |
| LTA-DBP | rs2050265  | 1p36  | 11802286     | a       | g       | 0.4709  | 0.0715 | 2.68E-10 | ++++++    | CLCN6     | MTHFR,NPPA,CLCN6,NPPB                                                          | CLCN6          | 8576                       |
| LTA-DBP | rs8042694  | 15q24 | 73012468     | a       | g       | -0.3311 | 0.0573 | 2.97E-08 | -----     | COX5A     | COX5A,MPI,SCAMP2,RPP25,C15orf17                                                | COX5A          | 4957                       |
| LTA-DBP | rs1813353  | 10p12 | 18747454     | t       | c       | 0.342   | 0.0566 | 6.84E-09 | ++++++    | CACNB2    | CACNB2                                                                         | CACNB2         | 17936                      |
| LTA-DBP | rs129128   | 6p22  | 26233321     | t       | c       | -0.4462 | 0.0749 | 1.10E-08 | -----     | NA        | HIST1H2BD,HIST1H2BC,HIST1H1E,HIST1H2BE,HIST1H4C,HIST1H2AC,HIST1H1T,HFE         | HIST1H2AC      | 425                        |
| LTA-DBP | rs2415251  | 15q24 | 73029208     | t       | c       | 0.3255  | 0.0548 | 1.22E-08 | ++++++    | NA        | COX5A,SCAMP5,MPI,RPP25,C15orf17                                                | RPP25          | 5287                       |
| LTA-DBP | rs12567136 | 1p36  | 11806318     | t       | c       | -0.4716 | 0.0715 | 2.49E-10 | -----     | CLCN6     | MTHFR,NPPA,CLCN6,NPPB                                                          | CLCN6          | 4544                       |
| LTA-DBP | rs2681472  | 12q21 | 8853390      | a       | g       | 0.5231  | 0.0691 | 4.01E-13 | ++++++    | ATP2B1    | ATP2B1                                                                         | ATP2B1         | 27132                      |
| LTA-DBP | rs17037425 | 1p36  | 11792970     | a       | g       | -0.4967 | 0.0753 | 2.49E-10 | -----     | ATP2B1    | MTHFR,NPPA,CLCN6,NPPB,AGTRAP                                                   | CLCN6          | 4177                       |
| LTA-DBP | rs11072514 | 15q24 | 73008918     | a       | t       | -0.3224 | 0.0526 | 4.26E-09 | -----     | COX5A     | COX5A,MPI,SCAMP2,RPP25,C15orf17                                                | COX5A          | 8507                       |
| LTA-DBP | rs3184504  | 12q24 | 110368991    | t       | c       | 0.3936  | 0.0524 | 6.08E-13 | ++++++    | SH2B3     | SH2B3,ATXN2                                                                    | SH2B3          | 4818                       |
| LTA-DBP | rs11105388 | 12q21 | 88598572     | c       | g       | -0.5267 | 0.0704 | 7.25E-13 | -----     | NA        | ATP2B1                                                                         | ATP2B1         | 24597                      |
| LTA-DBP | rs198851   | 6p22  | 26212611     | t       | g       | 0.4493  | 0.0777 | 2.97E-08 | ++++++    | NA        | HIST1H2BD,HIST1H2BC,HIST1H1E,HIST1H1C,HIST1H4C,HIST1H2AC,HIST1H1T,HFE,HIST1H3C | HIST1H4C       | 68                         |
| LTA-DBP | rs11105378 | 12q21 | 88614872     | t       | c       | -0.5253 | 0.0716 | 2.03E-12 | -----     | NA        | ATP2B1                                                                         | ATP2B1         | 40897                      |
| LTA-DBP | rs198823   | 6p22  | 26230912     | t       | g       | -0.3346 | 0.0553 | 6.57E-09 | -----     | NA        | HIST1H2BD,HIST1H2BC,HIST1H1E,HIST1H4C,HIST1H2AC,HIST1H1T,HFE                   | HIST1H2BC      | 761                        |
| LTA-DBP | rs11105328 | 12q21 | 88466521     | a       | g       | 0.4968  | 0.0727 | 5.59E-11 | ++++++    | NA        | ATP2B1,WDR51B,GALNT4                                                           | WDR51B         | 22613                      |
| LTA-DBP | rs11105379 | 12q21 | 88619304     | t       | c       | 0.4551  | 0.0774 | 1.71E-08 | ++++++    | NA        | ATP2B1                                                                         | ATP2B1         | 45329                      |
| LTA-DBP | rs11105358 | 12q21 | 88566273     | c       | g       | -0.3434 | 0.0532 | 5.82E-10 | -----     | ATP2B1    | ATP2B1                                                                         | ATP2B1         | 7702                       |
| LTA-DBP | rs17037390 | 1p36  | 11783430     | a       | g       | -0.4687 | 0.0717 | 3.70E-10 | -----     | MTHFR     | MTHFR,NPPA,CLCN6,NPPB,AGTRAP                                                   | MTHFR          | 5272                       |
| LTA-DBP | rs17630235 | 12q24 | 111070669    | a       | g       | 0.3354  | 0.0539 | 2.43E-09 | ++++++    | NA        | TRAFD1,C12orf30                                                                | TRAFD1         | 274                        |
| LTA-DBP | rs1378938  | 15q24 | 72883496     | t       | c       | 0.3371  | 0.0588 | 3.90E-08 | ++++++    | NA        | CPLX3,CYP1A2,SCAMP2,CSK,ULK3,LMAN1L                                            | CSK            | 939                        |
| LTA-MAP | rs1275986  | 2p23  | 26765583     | a       | c       | -0.3875 | 0.0616 | 1.80E-09 | -----     | NA        | KCNK3,CIB4                                                                     | KCNK3          | 3539                       |
| LTA-MAP | rs10858914 | 12q21 | 88555526     | t       | c       | 0.3913  | 0.061  | 8.48E-10 | ++++++    | ATP2B1    | ATP2B1                                                                         | ATP2B1         | 18449                      |
| LTA-MAP | rs6026747  | 20q13 | 57179019     | a       | g       | 0.5438  | 0.094  | 3.20E-08 | ++++++    | NA        | C20orf174                                                                      | C20orf174      | 20450                      |
| LTA-MAP | rs11072512 | 15q24 | 72991079     | t       | c       | -0.3902 | 0.0605 | 7.19E-10 | -----     | NA        | COX5A,SCAMP2,RPP25,C15orf17,MPI                                                | C15orf17       | 4564                       |
| LTA-MAP | rs7495739  | 15q24 | 72972723     | a       | g       | 0.3859  | 0.0605 | 1.05E-09 | ++++++    | MPI       | COX5A,SCAMP2,C15orf17,MPI,ULK3                                                 | MPI            | 3261                       |
| LTA-MAP | rs7537765  | 1p36  | 11809890     | a       | g       | 0.6026  | 0.0822 | 2.49E-12 | ++++++    | CLCN6     | MTHFR,NPPA,CLCN6,NPPB                                                          | CLCN6          | 972                        |
| LTA-MAP | rs1275979  | 2p23  | 26777072     | t       | c       | 0.385   | 0.0617 | 2.52E-09 | ++++++    | KCNK3     | KCNK3,CIB4                                                                     | KCNK3          | 7950                       |
| LTA-MAP | rs10858911 | 12q21 | 88487272     | a       | g       | -0.3729 | 0.0603 | 3.32E-09 | -----     | NA        | ATP2B1,WDR51B,GALNT4                                                           | ATP2B1         | 18686                      |
| LTA-MAP | rs7085     | 15q24 | 72882536     | t       | g       | 0.4311  | 0.0672 | 8.48E-10 | ++++++    | CSK       | CYP1A2,CSK,LMAN1L,CPLX3,SCAMP2,ULK3                                            | CSK            | 21                         |
| LTA-MAP | rs11905512 | 20q13 | 57187391     | c       | g       | -0.5575 | 0.0944 | 1.66E-08 | -----     | NA        | C20orf174                                                                      | C20orf174      | 12078                      |
| LTA-MAP | rs5068     | 1p36  | 11828561     | a       | g       | 0.8103  | 0.1348 | 9.06E-09 | ++++++    | NPPA      | MTHFR,NPPA,CLCN6,NPPB                                                          | NPPA           | 199                        |
| LTA-MAP | rs6495127  | 15q24 | 72981543     | t       | c       | -0.398  | 0.0658 | 7.53E-09 | -----     | C15orf17  | COX5A,MPI,SCAMP2,RPP25,C15orf17,ULK3                                           | C15orf17       | 2163                       |
| LTA-MAP | rs11105354 | 12q21 | 88550654     | a       | g       | 0.685   | 0.0801 | 2.98E-16 | ++++++    | ATP2B1    | ATP2B1                                                                         | ATP2B1         | 23321                      |
| LTA-MAP | rs12246717 | 10q21 | 63129189     | t       | g       | 0.4361  | 0.072  | 7.13E-09 | ++++++    | C10orf107 | C10orf107                                                                      | C10orf107      | 36465                      |
| LTA-MAP | rs10774625 | 12q24 | 110394602    | a       | g       | 0.443   | 0.0609 | 3.66E-12 | ++++++    | ATXN2     | SH2B3,ATXN2                                                                    | ATXN2          | 20201                      |
| LTA-MAP | rs882394   | 20q13 | 57132908     | t       | c       | 0.5221  | 0.0854 | 5.03E-09 | ++++++    | NA        | NA                                                                             | C20orf174      | 66661                      |
| LTA-MAP | rs6092743  | 20q13 | 57133765     | a       | g       | 0.6372  | 0.0871 | 3.80E-10 | ++++++    | NA        | NA                                                                             | C20orf174      | 65704                      |
| LTA-MAP | rs11634474 | 15q24 | 72933237     | c       | g       | 0.4059  | 0.0585 | 1.05E-08 | ++++++    | LMAN1L    | CSK,LMAN1L,CPLX3,SCAMP2,ULK3                                                   | LMAN1L         |                            |

| Trait   | SNPID      | Chr   | Position  | Bui Allele1 | Allele2 | Beta    | s.e.   | P        | Direction | InRefGene | RefGenes 60kbfromSNP                        | ClosestRefGene | DistanceFromClosestRefGene |
|---------|------------|-------|-----------|-------------|---------|---------|--------|----------|-----------|-----------|---------------------------------------------|----------------|----------------------------|
| LTA-MAP | rs4942666  | 12q21 | 88465680  | t           | c       | 0.6575  | 0.0857 | 2.22E-13 | ++++++    | NA        | ATP2B1;WDR51B;GALNT4                        | WDR51B         | 21772                      |
| LTA-MAP | rs17367504 | 1p36  | 11785365  | a           | g       | 0.5888  | 0.0825 | 9.08E-12 | ++++++    | MTHFR     | MTHFR;NPPA;CLCN6;NPPB;AGTRAP                | MTHFR          | 3337                       |
| LTA-MAP | rs11072511 | 15q24 | 72946486  | a           | g       | 0.3859  | 0.0605 | 1.09E-09 | ++++++    | SCAMP2    | COX5A;MPI;LMAN1L;CPLX3;SCAMP2;C15orf17;ULK3 | SCAMP2         | 6237                       |
| LTA-MAP | rs17696736 | 12q24 | 110971201 | a           | g       | -0.3667 | 0.0617 | 1.32E-08 | -----     | C12orf30  | ERP29;TMEM116;C12orf30                      | C12orf30       | 22325                      |
| LTA-MAP | rs7136259  | 12q21 | 88605319  | t           | c       | -0.4383 | 0.0607 | 4.98E-12 | -----     | NA        | ATP2B1                                      | ATP2B1         | 31344                      |
| LTA-MAP | rs236713   | 20q13 | 57128972  | a           | g       | -0.4742 | 0.0791 | 9.92E-09 | -----     | NA        | NA                                          | C20orf174      | 70497                      |
| LTA-MAP | rs2681485  | 12q21 | 88549753  | a           | g       | 0.4601  | 0.0611 | 6.24E-13 | ++++++    | ATP2B1    | ATP2B1                                      | 24222          |                            |
| LTA-MAP | rs2588918  | 10q21 | 63195030  | a           | t       | 0.4192  | 0.0711 | 1.76E-08 | ++++++    | C10orf107 | C10orf107                                   | 1065           |                            |
| LTA-MAP | rs1275923  | 2p23  | 26786300  | t           | c       | -0.3935 | 0.0633 | 2.84E-09 | -----     | KCNK3     | KCNK3;C2orf18                               | KCNK3          | 17178                      |
| LTA-MAP | rs12487    | 15q24 | 72923747  | t           | c       | 0.3523  | 0.0609 | 3.24E-08 | ++++++    | NA        | CPLX3;SCAMP2;C15orf17;MPI;CSK;ULK3;LMAN1L   | SCAMP2         | 502                        |
| LTA-MAP | rs2120702  | 10q21 | 63192684  | a           | t       | -0.4041 | 0.0683 | 1.55E-08 | -----     | C10orf107 | C10orf107                                   | 3431           |                            |
| LTA-MAP | rs12258967 | 10p12 | 18767965  | c           | g       | 0.452   | 0.0657 | 4.98E-11 | ++++++    | CACNB2    | CACNB2                                      | 38447          |                            |
| LTA-MAP | rs16916504 | 10q21 | 63122962  | a           | g       | 0.4371  | 0.0721 | 6.92E-09 | ++++++    | C10orf107 | C10orf107                                   | 30238          |                            |
| LTA-MAP | rs6495126  | 15q24 | 72952079  | a           | g       | 0.3953  | 0.0655 | 7.95E-09 | ++++++    | NA        | COX5A;MPI;LMAN1L;CPLX3;SCAMP2;C15orf17;ULK3 | MPI            | 7383                       |
| LTA-MAP | rs6100343  | 20q13 | 57133007  | a           | g       | 0.5228  | 0.0654 | 4.92E-09 | ++++++    | NA        | NA                                          | C20orf174      | 65882                      |
| LTA-MAP | rs2586986  | 2p23  | 26785635  | t           | c       | -0.3916 | 0.0628 | 2.56E-09 | -----     | KCNK3     | C2orf18;KCNK3                               | KCNK3          | 16413                      |
| LTA-MAP | rs236706   | 20q13 | 57124811  | t           | c       | -0.4863 | 0.0793 | 4.86E-09 | -----     | NA        | NA                                          | SLMO2          | 73515                      |
| LTA-MAP | rs12230074 | 12q21 | 88614998  | a           | g       | 0.6822  | 0.0825 | 2.82E-15 | ++++++    | NA        | ATP2B1                                      | ATP2B1         | 41023                      |
| LTA-MAP | rs11066188 | 12q24 | 111095907 | a           | g       | 0.3828  | 0.062  | 3.60E-09 | ++++++    | NA        | TRAFD1                                      | TRAFD1         | 19302                      |
| LTA-MAP | rs1378941  | 15q24 | 72867203  | a           | c       | -0.3867 | 0.0638 | 6.32E-09 | -----     | CSK       | CYP1A2;CSK;LMAN1L;CPLX3;SCAMP2;ULK3         | CSK            | 5436                       |
| LTA-MAP | rs11065987 | 12q24 | 110556807 | a           | g       | -0.4117 | 0.0628 | 3.16E-10 | -----     | NA        | BRAP;ATXN2;ACAD10                           | BRAP           | 9471                       |
| LTA-MAP | rs936226   | 15q24 | 72856335  | t           | c       | -0.4311 | 0.0676 | 1.08E-09 | -----     | NA        | CYP1A2;CYP1A1;CSK;LMAN1L;CPLX3;ULK3         | CSK            | 5432                       |
| LTA-MAP | rs880315   | 1p36  | 10719453  | t           | c       | -0.4597 | 0.067  | 5.49E-11 | -----     | CASZ1     | CASZ1                                       | 58941          |                            |
| LTA-MAP | rs2166122  | 10q21 | 63193080  | t           | c       | -0.4812 | 0.0766 | 1.88E-09 | -----     | C10orf107 | C10orf107                                   | 3015           |                            |
| LTA-MAP | rs236714   | 20q13 | 57129635  | a           | t       | 0.4894  | 0.0796 | 4.20E-09 | ++++++    | NA        | NA                                          | C20orf174      | 69834                      |
| LTA-MAP | rs1869959  | 15q24 | 72934385  | a           | c       | 0.3941  | 0.0677 | 2.66E-08 | ++++++    | SCAMP2    | MPI;CSK;LMAN1L;CPLX3;SCAMP2;C15orf17;ULK3   | SCAMP2         | 10136                      |
| LTA-MAP | rs16982520 | 20q13 | 57192115  | a           | g       | -0.5643 | 0.0945 | 1.16E-08 | -----     | NA        | C20orf174                                   | C20orf174      | 7354                       |
| LTA-MAP | rs653178   | 12q24 | 110492139 | t           | c       | -0.4433 | 0.0604 | 2.36E-12 | -----     | ATXN2     | ATXN2                                       | 29724          |                            |
| LTA-MAP | rs6015450  | 20q13 | 57184512  | a           | g       | -0.5552 | 0.0943 | 1.84E-08 | -----     | NA        | C20orf174                                   | C20orf174      | 14957                      |
| LTA-MAP | rs1378942  | 15q24 | 72864420  | a           | c       | -0.3853 | 0.0635 | 6.63E-09 | -----     | CSK       | CYP1A2;CYP1A1;CSK;LMAN1L;CPLX3;SCAMP2;ULK3  | CSK            | 2653                       |
| LTA-MAP | rs11066320 | 12q24 | 111390798 | a           | g       | 0.3536  | 0.061  | 3.06E-08 | ++++++    | PTPN11    | RPL6;PTPN11                                 | PTPN11         | 41301                      |
| LTA-MAP | rs2675612  | 10q21 | 63193272  | t           | c       | -0.4126 | 0.0684 | 8.09E-09 | -----     | C10orf107 | C10orf107                                   | 2823           |                            |
| LTA-MAP | rs4842667  | 12q21 | 88490785  | a           | g       | 0.3688  | 0.0602 | 4.62E-09 | ++++++    | NA        | ATP2B1;WDR51B;GALNT4                        | ATP2B1         | 15173                      |
| LTA-MAP | rs284277   | 1p36  | 10713384  | a           | c       | -0.4569 | 0.0692 | 2.73E-10 | -----     | CASZ1     | CASZ1                                       | 65910          |                            |
| LTA-MAP | rs3765066  | 15q24 | 72927907  | a           | g       | -0.4075 | 0.0649 | 1.99E-09 | -----     | SCAMP2    | CPLX3;SCAMP2;C15orf17;MPI;CSK;ULK3;LMAN1L   | SCAMP2         | 3658                       |
| LTA-MAP | rs1275982  | 2p23  | 26772593  | t           | c       | -0.3813 | 0.0618 | 3.57E-09 | -----     | KCNK3     | KCNK3;CIB4                                  | KCNK3          | 3471                       |
| LTA-MAP | rs6100342  | 20q13 | 57132656  | a           | c       | -0.5215 | 0.0853 | 5.14E-09 | -----     | NA        | NA                                          | C20orf174      | 66813                      |
| LTA-MAP | rs260014   | 20q13 | 57192854  | t           | c       | -0.5518 | 0.0904 | 5.36E-09 | -----     | NA        | C20orf174                                   | C20orf174      | 6615                       |
| LTA-MAP | rs11072518 | 15q24 | 73021663  | t           | c       | 0.4315  | 0.0636 | 8.95E-11 | ++++++    | NA        | COX5A;SCAMP5;RPP25;C15orf17;MPI             | COX5A          | 4238                       |
| LTA-MAP | rs8031937  | 15q24 | 72968174  | a           | g       | 0.397   | 0.0657 | 7.57E-09 | ++++++    | NA        | COX5A;MPI;CPLX3;SCAMP2;C15orf17;ULK3        | MPI            | 1288                       |
| LTA-MAP | rs1401982  | 12q21 | 8851730   | a           | g       | 0.4579  | 0.0609 | 6.90E-13 | ++++++    | ATP2B1    | ATP2B1                                      | 7772           |                            |
| LTA-MAP | rs11630918 | 15q24 | 72942948  | t           | c       | -0.3901 | 0.062  | 1.77E-09 | -----     | SCAMP2    | COX5A;MPI;LMAN1L;CPLX3;SCAMP2;C15orf17;ULK3 | SCAMP2         | 9774                       |
| LTA-MAP | rs998981   | 20q13 | 57133036  | t           | c       | 0.5224  | 0.0854 | 5.00E-09 | ++++++    | NA        | NA                                          | C20orf174      | 66433                      |
| LTA-MAP | rs2070759  | 12q21 | 8851887   | t           | g       | 0.3891  | 0.0608 | 9.54E-10 | ++++++    | ATP2B1    | ATP2B1                                      | 32108          |                            |
| LTA-MAP | rs12442901 | 15q24 | 72870965  | a           | g       | 0.428   | 0.0673 | 1.23E-09 | ++++++    | CSK       | CPLX3;CYP1A2;SCAMP2;CSK;ULK3;LMAN1L         | CSK            | 8198                       |
| LTA-MAP | rs13306561 | 1p36  | 11788391  | a           | g       | 0.6133  | 0.0832 | 1.83E-12 | ++++++    | MTHFR     | MTHFR;NPPA;CLCN6;NPPB;AGTRAP                | MTHFR          | 311                        |
| LTA-MAP | rs11072513 | 15q24 | 73008021  | t           | c       | -0.3959 | 0.0606 | 4.27E-10 | -----     | COX5A     | COX5A;MPI;SCAMP2;RPP25;C15orf17             | COX5A          | 8350                       |
| LTA-MAP | rs2681492  | 12q21 | 88537220  | t           | c       | 0.6564  | 0.0779 | 8.01E-16 | ++++++    | ATP2B1    | ATP2B1                                      | 31262          |                            |
| LTA-MAP | rs2168519  | 15q24 | 72867925  | t           | c       | 0.4287  | 0.0673 | 1.13E-09 | ++++++    | CSK       | CYP1A2;CSK;LMAN1L;CPLX3;SCAMP2;ULK3         | CSK            | 6158                       |
| LTA-MAP | rs1275977  | 2p23  | 26776359  | a           | g       | -0.3812 | 0.0664 | 4.04E-08 | -----     | KCNK3     | KCNK3;CIB4                                  | KCNK3          | 7237                       |
| LTA-MAP | rs2393833  | 10q21 | 63115322  | t           | c       | -0.4359 | 0.072  | 7.35E-09 | -----     | C10orf107 | C10orf107                                   | 22598          |                            |
| LTA-MAP | rs2004776  | 1q42  | 228915325 | t           | c       | 0.4226  | 0.0708 | 1.18E-08 | ++++++    | AGT       | AGT;COG2;CAPN9                              | AGT            | 1239                       |
| LTA-MAP | rs4886633  | 15q24 | 72965260  | a           | g       | -0.398  | 0.0656 | 6.81E-09 | -----     | NA        | COX5A;CPLX3;SCAMP2;C15orf17;MPI;ULK3        | MPI            | 4202                       |
| LTA-MAP | rs236715   | 20q13 | 57130490  | t           | c       | -0.4819 | 0.0794 | 6.55E-09 | -----     | NA        | NA                                          | C20orf174      | 68979                      |
| LTA-MAP | rs1543927  | 15q24 | 72850626  | t           | c       | 0.4104  | 0.0675 | 6.29E-09 | ++++++    | NA        | CPLX3;CYP1A2;CYP1A1;CSK;LMAN1L              | CSK            | 11141                      |
| LTA-MAP | rs492945   | 1p36  | 10723185  | a           | g       | -0.4088 | 0.0674 | 6.62E-09 | -----     | CASZ1     | CASZ1                                       | 56109          |                            |
| LTA-MAP | rs11856413 | 15q24 | 72986945  | a           | g       | 0.3881  | 0.0605 | 8.56E-10 | ++++++    | NA        | COX5A;SCAMP2;RPP25;C15orf17;MPI             | C15orf17       | 430                        |
| LTA-MAP | rs1133322  | 15q24 | 72999410  | a           | g       | 0.393   | 0.0606 | 5.61E-10 | ++++++    | NA        | COX5A;MPI;SCAMP2;RPP25;C15orf17             | COX5A          | 261                        |
| LTA-MAP | rs11105364 | 12q21 | 88593407  | t           | g       | 0.6848  | 0.0809 | 6.17E-16 | ++++++    | NA        | ATP2B1                                      | ATP2B1         | 19432                      |
| LTA-MAP | rs6495122  | 15q24 | 72912698  | a           | g       | 0.3642  | 0.0611 | 1.23E-08 | ++++++    | NA        | CPLX3;SCAMP2;MPI;CSK;ULK3;LMAN1L            | CPLX3          | 1509                       |
| LTA-MAP | rs12579302 | 12q21 | 88574634  | a           | g       | 0.6809  | 0.0808 | 7.72E-16 | ++++++    | NA        | ATP2B1                                      | ATP2B1         | 659                        |
| LTA-MAP | rs35441    | 12q24 | 114037498 | t           | c       | -0.3631 | 0.0629 | 3.41E-08 | -----     | NA        | NA                                          | TBX3           | 431146                     |
| LTA-MAP | rs17376328 | 1p36  | 11799249  | a           | g       | -0.7767 | 0.1318 | 1.79E-08 | -----     | CLCN6     | MTHFR;NPPA;CLCN6;NPPB                       | CLCN6          | 10456                      |
| LTA-MAP | rs12244842 | 10q21 | 63109192  | t           | g       | -0.4425 | 0.0723 | 4.97E-09 | -----     | C10orf107 | C10orf107                                   | 16468          |                            |
| LTA-MAP | rs4766578  | 12q24 | 110388754 | a           | t       | -0.4436 | 0.0609 | 3.45E-12 | -----     | ATXN2     | SH2B3;ATXN2                                 | ATXN2          | 14353                      |
| LTA-MAP | rs11105383 | 12q21 | 88631437  | t           | c       | 0.5824  | 0.0895 | 4.96E-10 | ++++++    | NA        | ATP2B1                                      | ATP2B1         | 57462                      |
| LTA-MAP | rs1992625  | 10q21 | 63190704  | t           | c       | -0.478  | 0.0764 | 2.26E-09 | -----     | C10orf107 | C10orf107                                   | 5391           |                            |
| LTA-MAP | rs4548524  | 10p12 | 18756873  | a           | g       | 0.3652  | 0.0631 | 3.10E-08 | ++++++    | CACNB2    | CACNB2                                      | 27355          |                            |
| LTA-MAP | rs1275988  | 2p23  | 26767968  | t           | c       | -0.3894 | 0.0616 | 1.51E-09 | -----     | NA        | KCNK3;CIB4                                  | KCNK3          | 1254                       |
| LTA-MAP | rs1133323  | 15q24 | 72999278  | t           | c       | -0.3986 | 0.0606 | 3.22E-10 | -----     | NA        | COX5A;MPI;SCAMP2;RPP25;C15orf17             | COX5A          | 393                        |
| LTA-MAP | rs1378940  | 15q24 | 72870547  | a           | c       | -0.3902 | 0.0639 | 5.28E-09 | -----     | CSK       | CPLX3;CYP1A2;SCAMP2;CSK;ULK3;LMAN1L         | CSK            | 8780                       |
| LTA-MAP | rs2301249  | 15q24 | 72879437  | t           | c       | 0.4315  | 0.0671 | 7.74E-10 | ++++++    | CSK       | CPLX3;CYP1A2;SCAMP2;CSK;ULK3;LMAN1L         | CSK            | 3120                       |
| LTA-MAP | rs1127796  | 15q24 | 72980057  | t           | c       | 0.3864  | 0.0605 | 1.02E-09 | ++++++    | C15orf17  | COX5A;SCAMP2;RPP25;C15orf17;MPI;ULK3        | C15orf17       | 677                        |
| LTA-MAP | rs4886406  | 15q24 | 72944256  | t           | g       | -0.3941 | 0.0676 | 2.50E-08 | -----     | NA        | CYP1A2;CYP1A1;CSK;LMAN1L                    | CYP1A2         | 8262                       |
| LTA-MAP | rs6026704  | 20q13 | 57117540  | c           | g       | 0.5037  | 0.0847 | 1.32E-08 | ++++++    | NA        | NA                                          | SLMO2          | 66244                      |
| LTA-MAP | rs7497393  | 15q24 | 72962510  | c           | g       | -0.3872 | 0.0604 | 9.16E-10 | -----     | NA        | COX5A;MPI;LMAN1L;CPLX3;SCAMP2;C15orf17;ULK3 | MPI            | 6952                       |
| LTA-MAP | rs7299436  | 12q21 | 88637201  | t           | g       | 0.5845  | 0.0898 | 5.02E-10 | ++++++    | NA        | NA                                          | ATP2B1         | 63226                      |
| LTA-MAP | rs7162232  | 15q24 | 72902948  | a           | g       | -0.4102 | 0.0885 | 1.02E-08 | -----     | LMAN1L    | CPLX3;SCAMP2;CSK;ULK3;LMAN1L                | LMAN1L         | 2203                       |
| LTA-MAP | rs6100340  | 20q13 | 57118007  | a           | g       | -0.5197 | 0.0848 | 4.63E-09 | -----     | NA        | NA                                          | SLMO2          | 66711                      |



| Trait   | SNPID      | Chr   | Position  | Bui Allele1 | Allele2 | Beta    | s.e.   | P        | Direction | InRefGene | RefGenes 60kbfromSNP                      | ClosestRefGene | DistanceFromClosestRefGene |
|---------|------------|-------|-----------|-------------|---------|---------|--------|----------|-----------|-----------|-------------------------------------------|----------------|----------------------------|
| LTA-MAP | rs8033381  | 15q24 | 72867738  | a           | g       | -0.4293 | 0.0673 | 1.07E-09 | -----     | CSK       | CPLX3,CYP1A2,SCAMP2,CSK,ULK3,LMAN1L       | CSK            | 5971                       |
| LTA-MAP | rs260013   | 20q13 | 57194118  | a           | g       | -0.5496 | 0.0905 | 6.48E-09 | -----     | NA        | C20orf174                                 | C20orf174      | 5351                       |
| LTA-MAP | rs12046278 | 1p36  | 10722164  | t           | c       | -0.4722 | 0.0693 | 7.26E-11 | -----?    | CASZ1     | CASZ1                                     | CASZ1          | 57130                      |
| LTA-MAP | rs3750727  | 10q21 | 63114411  | a           | g       | 0.4423  | 0.0723 | 5.01E-09 | ++++++    | C10orf107 | C10orf107                                 | C10orf107      | 21687                      |
| LTA-MAP | rs7362597  | 20q13 | 57112829  | a           | g       | 0.5054  | 0.0848 | 1.22E-08 | ++++++    | NA        | NA                                        | SLMO2          | 61533                      |
| LTA-MAP | rs7070797  | 10q21 | 63221779  | a           | g       | -0.5456 | 0.0878 | 2.89E-09 | -----     | NA        | C10orf107                                 | C10orf107      | 25684                      |
| LTA-MAP | rs236705   | 20q13 | 57122065  | t           | c       | -0.487  | 0.0793 | 4.46E-09 | -----     | NA        | NA                                        | SLMO2          | 70769                      |
| LTA-MAP | rs973237   | 10q21 | 63195307  | a           | g       | 0.42    | 0.0718 | 2.26E-08 | ++++++    | C10orf107 | C10orf107                                 | C10orf107      | 788                        |
| LTA-MAP | rs4886629  | 15q24 | 72859611  | c           | g       | -0.4308 | 0.0675 | 1.09E-09 | -----     | NA        | CPLX3,CYP1A2,CYP1A1,CSK,ULK3,LMAN1L       | CSK            | 2156                       |
| LTA-MAP | rs11854147 | 15q24 | 72839824  | t           | c       | 0.401   | 0.0671 | 1.09E-08 | ++++++    | NA        | CYP1A2,CYP1A1,CSK,LMAN1L                  | CYP1A2         | 3830                       |
| LTA-MAP | rs4845953  | 1p36  | 10724576  | a           | g       | -0.3955 | 0.0667 | 1.43E-08 | -----?    | CASZ1     | CASZ1                                     | CASZ1          | 54718                      |
| LTA-MAP | rs17249754 | 12q21 | 88584716  | a           | g       | -0.6855 | 0.0808 | 5.07E-16 | -----     | NA        | ATP2B1                                    | ATP2B1         | 10742                      |
| LTA-MAP | rs1408046  | 12q21 | 88633468  | t           | c       | -0.5057 | 0.0831 | 6.09E-09 | -----     | NA        | ATP2B1                                    | ATP2B1         | 59493                      |
| LTA-MAP | rs7176022  | 15q24 | 72894933  | a           | c       | 0.4115  | 0.0581 | 7.54E-09 | ++++++    | LMAN1L    | CYP1A2,CSK,LMAN1L,CPLX3,SCAMP2,ULK3       | LMAN1L         | 2687                       |
| LTA-MAP | rs1465537  | 20q13 | 57131415  | t           | c       | 0.5218  | 0.0853 | 4.98E-09 | ++++++    | NA        | NA                                        | C20orf174      | 68054                      |
| LTA-MAP | rs11105382 | 12q21 | 88631403  | t           | c       | 0.5818  | 0.0893 | 4.75E-10 | ++++++    | NA        | ATP2B1                                    | ATP2B1         | 57428                      |
| LTA-MAP | rs1275985  | 2p23  | 26785249  | t           | c       | -0.3857 | 0.0618 | 2.39E-09 | -----     | NA        | KCNK3,CIB4                                | KCNK3          | 3873                       |
| LTA-MAP | rs4886410  | 15q24 | 72852697  | c           | g       | -0.3871 | 0.064  | 7.21E-09 | -----     | NA        | CYP1A2,CYP1A1,CSK,LMAN1L,CPLX3            | CSK            | 9070                       |
| LTA-MAP | rs6026748  | 20q13 | 57179210  | a           | g       | 0.5518  | 0.0941 | 2.08E-08 | ++++++    | NA        | C20orf174                                 | C20orf174      | 20259                      |
| LTA-MAP | rs936230   | 15q24 | 72932151  | t           | c       | 0.3943  | 0.0677 | 2.53E-08 | ++++++    | SCAMP2    | MPI,CSK,LMAN1L,CPLX3,SCAMP2,C15orf17,ULK3 | SCAMP2         | 7902                       |
| LTA-MAP | rs11066301 | 12q24 | 111355755 | a           | g       | -0.3558 | 0.0612 | 2.79E-08 | -----     | PTFN11    | RPL6,PTFN11                               | PTFN11         | 14837                      |
| LTA-MAP | rs2588992  | 10q21 | 63184677  | t           | c       | -0.4589 | 0.0762 | 8.55E-09 | -----     | C10orf107 | C10orf107                                 | C10orf107      | 11418                      |
| LTA-MAP | rs35432    | 12q24 | 114039913 | t           | c       | -0.3676 | 0.0637 | 3.43E-08 | -----     | NA        | NA                                        | TBX3           | 433561                     |
| LTA-MAP | rs2113894  | 12q21 | 88623528  | a           | t       | 0.5072  | 0.0827 | 4.64E-09 | ++++++    | NA        | ATP2B1                                    | ATP2B1         | 49553                      |
| LTA-MAP | rs9210     | 15q24 | 72915554  | t           | c       | 0.3887  | 0.0675 | 3.73E-08 | ++++++    | ULK3      | MPI,CSK,LMAN1L,CPLX3,SCAMP2,ULK3          | ULK3           | 43                         |
| LTA-MAP | rs1130741  | 15q24 | 72976983  | a           | g       | 0.3858  | 0.0605 | 1.07E-09 | ++++++    | MPI       | COX5A,SCAMP2,RPP25,C15orf17,MPI,ULK3      | MPI            | 635                        |
| LTA-MAP | rs10858915 | 12q21 | 88575678  | a           | g       | 0.3548  | 0.0609 | 2.58E-08 | ++++++    | NA        | ATP2B1                                    | ATP2B1         | 1703                       |
| LTA-MAP | rs2050265  | 1p36  | 11802286  | a           | g       | 0.602   | 0.0823 | 2.77E-12 | ++++++    | CLCN6     | MTHFR,NPPA,CLCN6,NPPB                     | CLCN6          | 8576                       |
| LTA-MAP | rs11014166 | 10p12 | 18748804  | a           | t       | 0.3878  | 0.0633 | 4.77E-09 | ++++++    | CACNB2    | CACNB2                                    | CACNB2         | 19286                      |
| LTA-MAP | rs12243859 | 10p12 | 18706038  | t           | c       | -0.3739 | 0.0639 | 2.23E-08 | -----     | CACNB2    | CACNB2                                    | CACNB2         | 51120                      |
| LTA-MAP | rs4590817  | 10q21 | 63137559  | c           | g       | -0.4662 | 0.0816 | 4.72E-08 | -----     | C10orf107 | C10orf107                                 | C10orf107      | 44835                      |
| LTA-MAP | rs183173   | 20q13 | 57159500  | t           | g       | -0.5073 | 0.0888 | 4.81E-08 | -----     | NA        | C20orf174                                 | C20orf174      | 39969                      |
| LTA-MAP | rs8042694  | 15q24 | 73012468  | a           | g       | -0.4071 | 0.066  | 3.65E-09 | -----     | COX5A     | COX5A,MPI,SCAMP2,RPP25,C15orf17           | COX5A          | 4957                       |
| LTA-MAP | rs1275980  | 2p23  | 26770473  | t           | c       | -0.3863 | 0.0617 | 2.21E-09 | -----     | KCNK3     | KCNK3,CIB4                                | KCNK3          | 1351                       |
| LTA-MAP | rs1813353  | 10p12 | 18747454  | t           | c       | 0.439   | 0.0652 | 1.26E-10 | ++++++    | CACNB2    | CACNB2                                    | CACNB2         | 17936                      |
| LTA-MAP | rs6676300  | 1p36  | 11847887  | a           | g       | 0.3641  | 0.0634 | 4.03E-08 | ++++++    | NA        | MTHFR,KIAA2013,NPPA,CLCN6,NPPB            | NPPB           | 6308                       |
| LTA-MAP | rs2415251  | 15q24 | 73029208  | t           | c       | 0.3962  | 0.0631 | 1.99E-09 | ++++++    | NA        | COX5A,SCAMP2,MPI,RPP25,C15orf17           | RPP25          | 5287                       |
| LTA-MAP | rs12567136 | 1p36  | 11806318  | t           | c       | -0.6025 | 0.0823 | 2.64E-12 | -----     | CLCN6     | MTHFR,NPPA,CLCN6,NPPB                     | CLCN6          | 4544                       |
| LTA-MAP | rs2681472  | 12q21 | 88533090  | a           | g       | 0.6861  | 0.0796 | 1.77E-16 | ++++++    | ATP2B1    | ATP2B1                                    | ATP2B1         | 27132                      |
| LTA-MAP | rs17037425 | 1p36  | 11792970  | a           | g       | -0.6215 | 0.0888 | 7.76E-12 | -----     | CLCN6     | MTHFR,NPPA,CLCN6,NPPB,AGTRAP              | CLCN6          | 4177                       |
| LTA-MAP | rs11072514 | 15q24 | 73008918  | a           | t       | -0.396  | 0.0606 | 4.34E-10 | -----     | COX5A     | COX5A,MPI,SCAMP2,RPP25,C15orf17           | COX5A          | 8507                       |
| LTA-MAP | rs3184504  | 12q24 | 11038991  | t           | c       | 0.4469  | 0.0605 | 1.68E-12 | ++++++    | SH2B3     | SH2B3,ATXN2                               | SH2B3          | 4818                       |
| LTA-MAP | rs11105388 | 12q21 | 88598572  | c           | g       | -0.5845 | 0.081  | 6.81E-16 | -----     | NA        | ATP2B1                                    | ATP2B1         | 24597                      |
| LTA-MAP | rs4845843  | 1p36  | 10724172  | a           | g       | 0.6025  | 0.1056 | 4.87E-08 | ++++++    | CASZ1     | CASZ1                                     | CASZ1          | 55122                      |
| LTA-MAP | rs11105378 | 12q21 | 88614872  | t           | c       | -0.6822 | 0.0824 | 2.46E-15 | NA        | ATP2B1    | ATP2B1                                    | ATP2B1         | 40887                      |
| LTA-MAP | rs11105328 | 12q21 | 88466521  | a           | g       | 0.6393  | 0.0837 | 2.84E-13 | ++++++    | NA        | ATP2B1,WDR51B,GALNT4                      | WDR51B         | 22813                      |
| LTA-MAP | rs11105379 | 12q21 | 88619304  | t           | c       | 0.5869  | 0.0892 | 3.22E-10 | ++++++    | NA        | ATP2B1                                    | ATP2B1         | 45329                      |
| LTA-MAP | rs11105358 | 12q21 | 88566273  | c           | g       | -0.4644 | 0.0613 | 4.38E-13 | -----     | ATP2B1    | ATP2B1                                    | ATP2B1         | 7702                       |
| LTA-MAP | rs7922049  | 10q21 | 63132371  | a           | g       | -0.4993 | 0.085  | 2.00E-08 | -----     | C10orf107 | C10orf107                                 | C10orf107      | 39647                      |
| LTA-MAP | rs17037390 | 1p36  | 11783430  | a           | g       | -0.6015 | 0.0826 | 3.37E-12 | -----     | MTHFR     | MTHFR,NPPA,CLCN6,NPPB,AGTRAP              | MTHFR          | 5272                       |
| LTA-MAP | rs236710   | 20q13 | 57127024  | t           | g       | -0.4852 | 0.0793 | 5.04E-09 | -----     | NA        | NA                                        | C20orf174      | 72445                      |
| LTA-MAP | rs17630235 | 12q24 | 111076069 | a           | g       | 0.3848  | 0.062  | 2.94E-09 | ++++++    | NA        | TRAFD1,C12orf30                           | TRAFD1         | 274                        |
| LTA-MAP | rs1378938  | 15q24 | 72883496  | t           | c       | 0.4148  | 0.0679 | 5.32E-09 | ++++++    | NA        | CPLX3,CYP1A2,SCAMP2,CSK,ULK3,LMAN1L       | CSK            | 939                        |
| LTA-MAP | rs11014171 | 10p12 | 18751201  | t           | c       | -0.3892 | 0.0632 | 3.88E-09 | -----     | CACNB2    | CACNB2                                    | CACNB2         | 21683                      |
| LTA-PP  | rs1717014  | 3p22  | 41892399  | t           | c       | -0.4739 | 0.0825 | 2.22E-08 | -----     | ULK4      | ULK4                                      | ULK4           | 86265                      |
| LTA-PP  | rs9854833  | 3p22  | 41750581  | t           | c       | -0.4956 | 0.082  | 3.95E-09 | -----     | ULK4      | ULK4                                      | ULK4           | 228083                     |
| LTA-PP  | rs1717003  | 3p22  | 41912004  | t           | c       | 0.4803  | 0.0824 | 1.36E-08 | ++++++    | ULK4      | ULK4                                      | ULK4           | 66660                      |
| LTA-PP  | rs1717034  | 3p22  | 41930917  | a           | g       | -0.483  | 0.0823 | 1.10E-08 | -----     | ULK4      | ULK4                                      | ULK4           | 47747                      |
| LTA-PP  | rs2469     | 6p21  | 43407301  | t           | c       | -0.3519 | 0.0623 | 3.88E-08 | -----     | NA        | TTBK1,ZNF318,CRIP3,SLC22A7                | ZNF318         | 4484                       |
| LTA-PP  | rs6796210  | 3p22  | 41826722  | t           | c       | 0.4691  | 0.082  | 2.58E-08 | ++++++    | ULK4      | ULK4                                      | ULK4           | 151942                     |
| LTA-PP  | rs1717007  | 3p22  | 41917203  | t           | c       | -0.4817 | 0.0824 | 1.23E-08 | -----     | ULK4      | ULK4                                      | ULK4           | 61481                      |
| LTA-PP  | rs7634985  | 3p22  | 41994569  | t           | c       | 0.5174  | 0.0861 | 4.93E-09 | ++++++    | NA        | ULK4                                      | ULK4           | 15905                      |
| LTA-PP  | rs1052501  | 3p22  | 41900402  | t           | c       | 0.4781  | 0.0823 | 1.55E-08 | ++++++    | ULK4      | ULK4                                      | ULK4           | 78262                      |
| LTA-PP  | rs7622259  | 3p22  | 41863355  | a           | t       | 0.4706  | 0.0827 | 2.96E-08 | ++++++    | ULK4      | ULK4                                      | ULK4           | 122309                     |
| LTA-PP  | rs2272007  | 3p22  | 41971140  | t           | c       | -0.4879 | 0.082  | 6.77E-09 | -----     | ULK4      | ULK4                                      | ULK4           | 7524                       |
| LTA-PP  | rs9874975  | 3p22  | 41739304  | a           | g       | -0.4943 | 0.0819 | 4.26E-09 | -----     | ULK4      | ULK4                                      | ULK4           | 239360                     |
| LTA-PP  | rs6783001  | 3p22  | 41837236  | a           | c       | -0.4746 | 0.0825 | 2.13E-08 | -----     | ULK4      | ULK4                                      | ULK4           | 141428                     |
| LTA-PP  | rs2242416  | 6p21  | 43381582  | a           | g       | 0.355   | 0.0623 | 2.92E-08 | ++++++    | CRIP3     | CRIP3,SLC22A7,TTBK1,ZNF318                | SLC22A7        | 329                        |
| LTA-PP  | rs1716999  | 3p22  | 41905045  | c           | g       | -0.479  | 0.0823 | 1.47E-08 | -----     | ULK4      | ULK4                                      | ULK4           | 73619                      |
| LTA-PP  | rs7631057  | 3p22  | 41792955  | t           | c       | -0.4772 | 0.0822 | 1.58E-08 | -----     | ULK4      | ULK4                                      | ULK4           | 185709                     |
| LTA-PP  | rs9865780  | 3p22  | 41870806  | a           | g       | 0.4729  | 0.0826 | 2.49E-08 | ++++++    | ULK4      | ULK4                                      | ULK4           | 107858                     |
| LTA-PP  | rs1716855  | 3p22  | 41893710  | a           | g       | -0.4739 | 0.0825 | 2.21E-08 | -----     | ULK4      | ULK4                                      | ULK4           | 84954                      |
| LTA-PP  | rs6802340  | 3p22  | 41869038  | t           | c       | 0.4709  | 0.0827 | 2.90E-08 | ++++++    | ULK4      | ULK4                                      | ULK4           | 109626                     |
| LTA-PP  | rs1717027  | 3p22  | 41982924  | t           | c       | -0.488  | 0.082  | 6.80E-09 | -----     | ULK4      | ULK4                                      | ULK4           | 15740                      |
| LTA-PP  | rs6796078  | 3p22  | 41982924  | a           | t       | -0.5183 | 0.0861 | 4.82E-09 | -----     | NA        | ULK4                                      | ULK4           | 14180                      |
| LTA-PP  | rs6781326  | 3p22  | 41752032  | t           | c       | 0.4963  | 0.0817 | 3.28E-09 | ++++++    | ULK4      | ULK4                                      | ULK4           | 22632                      |
| LTA-PP  | rs7632387  | 3p22  | 41828165  | t           | c       | -0.4687 | 0.0821 | 2.67E-08 | -----     | ULK4      | ULK4                                      | ULK4           | 150499                     |
| LTA-PP  | rs1624519  | 3p22  | 41959804  | a           | g       | 0.4838  | 0.0823 | 1.05E-08 | ++++++    | ULK4      | ULK4                                      | ULK4           | 18880                      |
| LTA-PP  | rs809930   | 3p22  | 42040009  | a           | g       | 0.5026  | 0.0868 | 1.71E-08 | ++++++    | NA        | NA                                        | ULK4           | 61345                      |

| Trait  | SNPID      | Chr  | Position  | Bui Allele1 | Allele2 | Beta    | s.e.   | P        | Direction | InRefGene | RefGenes.60kbfromSNP       | ClosestRefGene | DistanceFromClosestRefGene |
|--------|------------|------|-----------|-------------|---------|---------|--------|----------|-----------|-----------|----------------------------|----------------|----------------------------|
| LTA-PP | rs6776724  | 3p22 | 41816274  | a           | g       | 0.4692  | 0.0823 | 2.79E-08 | ++++++    | ULK4      | ULK4                       | ULK4           | 162390                     |
| LTA-PP | rs6791806  | 3p22 | 41864999  | t           | c       | -0.4709 | 0.0827 | 2.89E-08 | -----     | ULK4      | ULK4                       | ULK4           | 113665                     |
| LTA-PP | rs939561   | 3p22 | 42032105  | a           | g       | 0.4936  | 0.087  | 3.27E-08 | ++++++    | NA        | ULK4                       | ULK4           | 53441                      |
| LTA-PP | rs1717017  | 3p22 | 41890620  | a           | c       | 0.4737  | 0.0825 | 2.25E-08 | ++++++    | ULK4      | ULK4                       | ULK4           | 88044                      |
| LTA-PP | rs4615050  | 3p22 | 41917502  | a           | t       | 0.482   | 0.0824 | 1.20E-08 | ++++++    | ULK4      | ULK4                       | ULK4           | 61162                      |
| LTA-PP | rs3890604  | 3p22 | 41735629  | t           | c       | -0.4915 | 0.0819 | 5.06E-09 | -----     | ULK4      | ULK4                       | ULK4           | 243035                     |
| LTA-PP | rs9850310  | 3p22 | 41866102  | t           | c       | 0.4708  | 0.0827 | 2.92E-08 | ++++++    | ULK4      | ULK4                       | ULK4           | 112562                     |
| LTA-PP | rs12705390 | 7q22 | 106198013 | a           | g       | 0.5865  | 0.0759 | 5.40E-14 | ++++++    | NA        | NA                         | PIK3CG         | 95146                      |
| LTA-PP | rs7646144  | 3p22 | 41828129  | a           | t       | -0.4686 | 0.0821 | 2.69E-08 | -----     | ULK4      | ULK4                       | ULK4           | 150535                     |
| LTA-PP | rs9856088  | 3p22 | 41835486  | t           | g       | -0.4946 | 0.0847 | 1.29E-08 | -----     | ULK4      | ULK4                       | ULK4           | 143178                     |
| LTA-PP | rs1016989  | 3p22 | 41869444  | t           | c       | 0.4717  | 0.0826 | 2.72E-08 | ++++++    | ULK4      | ULK4                       | ULK4           | 109220                     |
| LTA-PP | rs1717006  | 3p22 | 41915452  | a           | c       | 0.4791  | 0.082  | 1.29E-08 | ++++++    | ULK4      | ULK4                       | ULK4           | 63212                      |
| LTA-PP | rs880315   | 1p36 | 10719453  | t           | c       | -0.421  | 0.0703 | 5.45E-09 | -----     | CASZ1     | CASZ1                      | CASZ1          | 59841                      |
| LTA-PP | rs1716975  | 3p22 | 41935010  | t           | c       | -0.4837 | 0.0822 | 1.01E-08 | -----     | ULK4      | ULK4                       | ULK4           | 43654                      |
| LTA-PP | rs17398575 | 7q22 | 106196888 | a           | g       | 0.5732  | 0.075  | 1.02E-13 | ++++++    | NA        | NA                         | PIK3CG         | 96471                      |
| LTA-PP | rs1717020  | 3p22 | 41956494  | a           | c       | 0.4829  | 0.082  | 9.73E-09 | ++++++    | ULK4      | ULK4                       | ULK4           | 22170                      |
| LTA-PP | rs7629767  | 3p22 | 42018513  | t           | g       | 0.4948  | 0.0867 | 2.75E-08 | ++++++    | NA        | ULK4                       | ULK4           | 39849                      |
| LTA-PP | rs284277   | 1p36 | 10713384  | a           | c       | -0.4142 | 0.073  | 3.27E-08 | -----     | CASZ1     | CASZ1                      | CASZ1          | 65910                      |
| LTA-PP | rs17062109 | 3p22 | 41785368  | t           | c       | -0.4773 | 0.082  | 1.46E-08 | -----     | ULK4      | ULK4                       | ULK4           | 193296                     |
| LTA-PP | rs1716984  | 3p22 | 41940536  | a           | g       | 0.4835  | 0.0823 | 1.06E-08 | ++++++    | ULK4      | ULK4                       | ULK4           | 38128                      |
| LTA-PP | rs9866759  | 3p22 | 41733422  | t           | c       | 0.483   | 0.0821 | 9.91E-09 | ++++++    | ULK4      | ULK4                       | ULK4           | 245242                     |
| LTA-PP | rs1716653  | 3p22 | 41950602  | a           | c       | 0.4838  | 0.0823 | 1.04E-08 | ++++++    | ULK4      | ULK4                       | ULK4           | 28062                      |
| LTA-PP | rs2128834  | 3p22 | 41837649  | a           | g       | 0.4694  | 0.0822 | 2.68E-08 | ++++++    | ULK4      | ULK4                       | ULK4           | 141015                     |
| LTA-PP | rs6599168  | 3p22 | 41725327  | t           | c       | 0.5163  | 0.0865 | 6.11E-09 | ++++++    | ULK4      | ULK4                       | ULK4           | 253337                     |
| LTA-PP | rs1716694  | 3p22 | 41961403  | t           | g       | 0.4864  | 0.0823 | 8.67E-09 | ++++++    | ULK4      | ULK4                       | ULK4           | 17261                      |
| LTA-PP | rs1613233  | 3p22 | 41920148  | a           | g       | -0.4819 | 0.0824 | 1.22E-08 | -----     | ULK4      | ULK4                       | ULK4           | 58516                      |
| LTA-PP | rs9882329  | 3p22 | 41742158  | t           | c       | 0.4949  | 0.082  | 4.10E-09 | ++++++    | ULK4      | ULK4                       | ULK4           | 236506                     |
| LTA-PP | rs12705389 | 7q22 | 106192878 | t           | c       | 0.5759  | 0.0753 | 9.52E-14 | ++++++    | NA        | NA                         | PIK3CG         | 100281                     |
| LTA-PP | rs11760498 | 7q22 | 106206208 | a           | g       | 0.4499  | 0.0803 | 4.89E-08 | ++++++    | NA        | NA                         | PIK3CG         | 86951                      |
| LTA-PP | rs10212536 | 3p22 | 41802030  | a           | g       | 0.4749  | 0.0823 | 1.96E-08 | ++++++    | ULK4      | ULK4                       | ULK4           | 176634                     |
| LTA-PP | rs6789260  | 3p22 | 41751354  | c           | g       | -0.4961 | 0.0817 | 3.36E-09 | -----     | ULK4      | ULK4                       | ULK4           | 227310                     |
| LTA-PP | rs10865914 | 3p22 | 41894503  | t           | c       | 0.4741  | 0.0825 | 2.17E-08 | ++++++    | ULK4      | ULK4                       | ULK4           | 84161                      |
| LTA-PP | rs2949837  | 7p13 | 45960903  | a           | t       | 0.402   | 0.0706 | 2.94E-08 | ++++++    | NA        | IGFBP3                     | IGFBP3         | 33507                      |
| LTA-PP | rs9828398  | 3p22 | 41870897  | t           | c       | -0.4731 | 0.0826 | 2.43E-08 | -----     | ULK4      | ULK4                       | ULK4           | 107767                     |
| LTA-PP | rs1615243  | 3p22 | 41940238  | t           | c       | 0.4836  | 0.0823 | 1.05E-08 | ++++++    | ULK4      | ULK4                       | ULK4           | 38426                      |
| LTA-PP | rs12536419 | 7q22 | 106206532 | a           | c       | -0.4747 | 0.0839 | 3.60E-08 | -----     | NA        | NA                         | PIK3CG         | 86627                      |
| LTA-PP | rs7372217  | 3p22 | 41965126  | a           | g       | 0.4881  | 0.082  | 6.74E-09 | ++++++    | ULK4      | ULK4                       | ULK4           | 13538                      |
| LTA-PP | rs1716685  | 3p22 | 41900305  | t           | c       | -0.4772 | 0.0819 | 1.43E-08 | -----     | ULK4      | ULK4                       | ULK4           | 78359                      |
| LTA-PP | rs9847006  | 3p22 | 41730363  | t           | c       | 0.4844  | 0.0823 | 1.00E-08 | ++++++    | ULK4      | ULK4                       | ULK4           | 248301                     |
| LTA-PP | rs13087502 | 3p22 | 41990114  | t           | c       | 0.5202  | 0.086  | 3.93E-09 | ++++++    | NA        | ULK4                       | ULK4           | 11450                      |
| LTA-PP | rs2125738  | 6p21 | 43435728  | a           | g       | 0.3569  | 0.0628 | 3.20E-08 | ++++++    | ZNF318    | CRIP3,SLC22A7,ZNF318       | ZNF318         | 9431                       |
| LTA-PP | rs2625967  | 3p22 | 41875955  | a           | c       | -0.4736 | 0.0826 | 2.39E-08 | -----     | ULK4      | ULK4                       | ULK4           | 102709                     |
| LTA-PP | rs1716983  | 3p22 | 41939132  | a           | g       | 0.4835  | 0.0823 | 1.05E-08 | ++++++    | ULK4      | ULK4                       | ULK4           | 39532                      |
| LTA-PP | rs1716992  | 3p22 | 41959790  | a           | g       | 0.484   | 0.0823 | 1.04E-08 | ++++++    | ULK4      | ULK4                       | ULK4           | 19974                      |
| LTA-PP | rs9856933  | 3p22 | 41988854  | a           | g       | -0.4836 | 0.0819 | 9.04E-09 | -----     | NA        | ULK4                       | ULK4           | 10190                      |
| LTA-PP | rs1574430  | 6p21 | 43377007  | a           | c       | 0.3555  | 0.0625 | 3.04E-08 | ++++++    | SLC22A7   | CRIP3,SLC22A7,TTBK1,ZNF318 | SLC22A7        | 3032                       |
| LTA-PP | rs939558   | 3p22 | 41951044  | a           | c       | 0.4839  | 0.0823 | 1.04E-08 | ++++++    | ULK4      | ULK4                       | ULK4           | 27620                      |
| LTA-PP | rs1747177  | 7q22 | 106199094 | t           | c       | -0.589  | 0.0763 | 5.61E-14 | -----     | NA        | NA                         | PIK3CG         | 94065                      |
| LTA-PP | rs10948071 | 6p21 | 43388691  | t           | c       | -0.3846 | 0.0652 | 9.06E-09 | -----     | NA        | CRIP3,SLC22A7,TTBK1,ZNF318 | CRIP3          | 4183                       |
| LTA-PP | rs9823254  | 3p22 | 41899772  | c           | g       | -0.4718 | 0.0826 | 2.69E-08 | -----     | ULK4      | ULK4                       | ULK4           | 108892                     |
| LTA-PP | rs4973995  | 3p22 | 41906477  | t           | c       | -0.4796 | 0.0823 | 1.42E-08 | -----     | ULK4      | ULK4                       | ULK4           | 72187                      |
| LTA-PP | rs9825741  | 3p22 | 41736832  | a           | t       | 0.49    | 0.0817 | 5.25E-09 | ++++++    | ULK4      | ULK4                       | ULK4           | 241832                     |
| LTA-PP | rs9866092  | 3p22 | 41870971  | a           | c       | 0.4734  | 0.0826 | 2.38E-08 | ++++++    | ULK4      | ULK4                       | ULK4           | 107693                     |
| LTA-PP | rs6599176  | 3p22 | 41763496  | t           | g       | 0.4973  | 0.0818 | 3.23E-09 | ++++++    | ULK4      | ULK4                       | ULK4           | 215168                     |
| LTA-PP | rs9867627  | 3p22 | 41770845  | a           | c       | 0.4941  | 0.0821 | 4.63E-09 | ++++++    | ULK4      | ULK4                       | ULK4           | 207819                     |
| LTA-PP | rs9830469  | 3p22 | 41737539  | a           | g       | 0.4917  | 0.0819 | 4.96E-09 | ++++++    | ULK4      | ULK4                       | ULK4           | 241125                     |
| LTA-PP | rs9865127  | 3p22 | 41782452  | t           | c       | -0.4781 | 0.082  | 1.39E-08 | -----     | ULK4      | ULK4                       | ULK4           | 196212                     |
| LTA-PP | rs6803560  | 3p22 | 41799484  | a           | g       | 0.4768  | 0.0822 | 1.64E-08 | ++++++    | ULK4      | ULK4                       | ULK4           | 179180                     |
| LTA-PP | rs2841647  | 6p21 | 43377158  | a           | c       | -0.3538 | 0.0627 | 3.92E-08 | -----     | SLC22A7   | CRIP3,SLC22A7,TTBK1,ZNF318 | SLC22A7        | 3183                       |
| LTA-PP | rs1716657  | 3p22 | 41893460  | t           | c       | 0.4737  | 0.0825 | 2.24E-08 | ++++++    | ULK4      | ULK4                       | ULK4           | 85204                      |
| LTA-PP | rs9846634  | 3p22 | 41869053  | a           | g       | -0.4764 | 0.0829 | 2.22E-08 | -----     | ULK4      | ULK4                       | ULK4           | 109611                     |
| LTA-PP | rs7650227  | 3p22 | 41769941  | t           | g       | 0.5006  | 0.0821 | 2.84E-09 | ++++++    | ULK4      | ULK4                       | ULK4           | 208723                     |
| LTA-PP | rs1994157  | 3p22 | 41872486  | a           | g       | -0.4734 | 0.0826 | 2.42E-08 | -----     | ULK4      | ULK4                       | ULK4           | 106178                     |
| LTA-PP | rs9875107  | 3p22 | 41797317  | a           | t       | 0.4767  | 0.0822 | 1.64E-08 | ++++++    | ULK4      | ULK4                       | ULK4           | 181347                     |
| LTA-PP | rs11923562 | 3p22 | 41735335  | t           | g       | -0.4917 | 0.0819 | 5.06E-09 | -----     | ULK4      | ULK4                       | ULK4           | 243329                     |
| LTA-PP | rs7626217  | 3p22 | 41817419  | a           | g       | 0.47    | 0.0821 | 2.52E-08 | ++++++    | ULK4      | ULK4                       | ULK4           | 161245                     |
| LTA-PP | rs17060961 | 3p22 | 41738715  | a           | g       | 0.4946  | 0.0819 | 4.19E-09 | ++++++    | ULK4      | ULK4                       | ULK4           | 239949                     |
| LTA-PP | rs794902   | 3p22 | 42000943  | t           | c       | -0.5158 | 0.0861 | 5.47E-09 | -----     | NA        | ULK4                       | ULK4           | 22279                      |
| LTA-PP | rs6599167  | 3p22 | 41725264  | a           | g       | 0.5164  | 0.0866 | 6.34E-09 | ++++++    | ULK4      | ULK4                       | ULK4           | 253400                     |
| LTA-PP | rs12635286 | 3p22 | 42026840  | t           | c       | 0.4858  | 0.0867 | 4.95E-08 | ++++++    | NA        | ULK4                       | ULK4           | 48176                      |
| LTA-PP | rs1716642  | 3p22 | 41940869  | a           | c       | -0.4835 | 0.0823 | 1.06E-08 | -----     | ULK4      | ULK4                       | ULK4           | 37795                      |
| LTA-PP | rs7648578  | 3p22 | 41833735  | t           | c       | -0.4694 | 0.0821 | 2.55E-08 | -----     | ULK4      | ULK4                       | ULK4           | 144929                     |
| LTA-PP | rs7652506  | 3p22 | 42035239  | t           | c       | -0.49   | 0.0869 | 4.08E-08 | -----     | NA        | ULK4                       | ULK4           | 56575                      |
| LTA-PP | rs13089394 | 3p22 | 41926719  | a           | g       | 0.4824  | 0.0823 | 1.17E-08 | ++++++    | ULK4      | ULK4                       | ULK4           | 51945                      |
| LTA-PP | rs1716993  | 3p22 | 41960804  | t           | c       | 0.4857  | 0.0823 | 9.18E-09 | ++++++    | ULK4      | ULK4                       | ULK4           | 18960                      |
| LTA-PP | rs17063599 | 3p22 | 41836880  | t           | c       | -0.4743 | 0.0825 | 2.18E-08 | -----     | ULK4      | ULK4                       | ULK4           | 141984                     |
| LTA-PP | rs2272006  | 3p22 | 41972063  | t           | c       | 0.4891  | 0.082  | 6.77E-09 | ++++++    | ULK4      | ULK4                       | ULK4           | 6601                       |
| LTA-PP | rs6768128  | 3p22 | 41840084  | a           | g       | -0.4744 | 0.0825 | 2.19E-08 | -----     | ULK4      | ULK4                       | ULK4           | 138580                     |
| LTA-PP | rs6599179  | 3p22 | 41830288  | t           | c       | -0.4685 | 0.0821 | 2.70E-08 | -----     | ULK4      | ULK4                       | ULK4           | 148376                     |

| Trait  | SNPID      | Chr  | Position  | Bui Allele1 | Allele2 | Beta    | s.e.   | P        | Direction | InRefGene | RefGenes 60kbfromSNP | ClosestRefGene | DistanceFromClosestRefGene |
|--------|------------|------|-----------|-------------|---------|---------|--------|----------|-----------|-----------|----------------------|----------------|----------------------------|
| LTA-PP | rs9842261  | 3p22 | 41797712  | a           | g       | -0.4745 | 0.0821 | 1.83E-08 | ----->    | ULK4      | ULK4                 | ULK4           | 180952                     |
| LTA-PP | rs9820192  | 3p22 | 41864285  | a           | g       | -0.4706 | 0.0827 | 2.96E-08 | ----->    | ULK4      | ULK4                 | ULK4           | 114379                     |
| LTA-PP | rs6793520  | 3p22 | 41840293  | c           | g       | 0.4748  | 0.0826 | 2.15E-08 | +++++++>  | ULK4      | ULK4                 | ULK4           | 138371                     |
| LTA-PP | rs9876960  | 3p22 | 41960816  | t           | c       | 0.4856  | 0.0823 | 9.17E-09 | +++++++>  | ULK4      | ULK4                 | ULK4           | 17848                      |
| LTA-PP | rs1716683  | 3p22 | 41898078  | a           | g       | -0.4769 | 0.0824 | 1.78E-08 | ----->    | ULK4      | ULK4                 | ULK4           | 80586                      |
| LTA-PP | rs6599175  | 3p22 | 41761013  | t           | c       | 0.4966  | 0.0816 | 3.18E-09 | +++++++>  | ULK4      | ULK4                 | ULK4           | 217651                     |
| LTA-PP | rs13325965 | 3p22 | 41889946  | t           | g       | -0.4752 | 0.0825 | 2.04E-08 | ----->    | ULK4      | ULK4                 | ULK4           | 88718                      |
| LTA-PP | rs9852303  | 3p22 | 41734529  | t           | c       | -0.483  | 0.0819 | 9.49E-09 | ----->    | ULK4      | ULK4                 | ULK4           | 244135                     |
| LTA-PP | rs794899   | 3p22 | 42003726  | t           | c       | -0.5166 | 0.0861 | 5.22E-09 | ----->    | NA        | ULK4                 | ULK4           | 25062                      |
| LTA-PP | rs13225723 | 7q22 | 106203703 | a           | g       | 0.6031  | 0.0827 | 1.26E-12 | +++++++>  | NA        | NA                   | PIK3CG         | 89456                      |
| LTA-PP | rs9815354  | 3p22 | 41887655  | a           | g       | -0.5025 | 0.0855 | 1.05E-08 | ----->    | ULK4      | ULK4                 | ULK4           | 91009                      |
| LTA-PP | rs13084436 | 3p22 | 41992541  | a           | t       | 0.5181  | 0.0861 | 4.63E-09 | +++++++>  | NA        | ULK4                 | ULK4           | 13877                      |
| LTA-PP | rs704964   | 3p22 | 42028903  | a           | g       | 0.4921  | 0.0866 | 3.18E-08 | +++++++>  | NA        | ULK4                 | ULK4           | 50239                      |
| LTA-PP | rs9857175  | 3p22 | 41797058  | t           | g       | 0.4772  | 0.0822 | 1.59E-08 | +++++++>  | ULK4      | ULK4                 | ULK4           | 181606                     |
| LTA-PP | rs3934103  | 3p22 | 41952218  | t           | c       | 0.4848  | 0.0823 | 9.77E-09 | +++++++>  | ULK4      | ULK4                 | ULK4           | 26446                      |
| LTA-PP | rs3774372  | 3p22 | 41852418  | t           | c       | 0.4718  | 0.0825 | 2.62E-08 | +++++++>  | ULK4      | ULK4                 | ULK4           | 126246                     |

"Direction" corresponds to order of cohorts as listed in Supplementary Table 3.

**Table S5: eQTL analysis results for the index SNP in each of the 39 loci identified in the analysis of LTA BP traits and for which eQTL data was available.**

| IndexSNP   | Traits      | InRefGene | RefGenes60kb                          | Locus# | Index/LD status   | r <sup>2</sup> to index | eSNPid     | Tissue                                   | eSNP P value     | Chr | B36pos   | ArrayID         | Transcript         | type of eQTL (cis or trans) | Beta  | Allele | Probe Chromosome | Probe Position |
|------------|-------------|-----------|---------------------------------------|--------|-------------------|-------------------------|------------|------------------------------------------|------------------|-----|----------|-----------------|--------------------|-----------------------------|-------|--------|------------------|----------------|
| rs13306561 | DBP/SBP/MAP | MTHFR     | NPPB;NPPA-AS1;CLCN6;MTHFR;NPPA;AGTRAP | 1      | IndexSNP          |                         | rs13306561 | Whole blood (CHARGE)                     | 2.19E-72         | 1   | 11788391 | 3990477         | MTHFR,Clorf167     | cis                         | 17.99 | G      | 1                | 11769609       |
| rs13306561 | DBP/SBP/MAP | MTHFR     | NPPB;NPPA-AS1;CLCN6;MTHFR;NPPA;AGTRAP | 1      | IndexSNP          |                         | rs13306561 | LCL (MuTHER)                             | 1.91E-16         | 1   | 11788391 | ILMN_1734830    | MTHFR              | cis                         |       |        |                  |                |
| rs13306561 | DBP/SBP/MAP | MTHFR     | NPPB;NPPA-AS1;CLCN6;MTHFR;NPPA;AGTRAP | 1      | IndexSNP          |                         | rs13306561 | Whole blood (PaxGene) in Japanese        | 1.20E-09         | 1   | 11788391 | A_23_P400081    | MTHFR              | cis                         | 0.63  |        |                  |                |
| rs13306561 | DBP/SBP/MAP | MTHFR     | NPPB;NPPA-AS1;CLCN6;MTHFR;NPPA;AGTRAP | 1      | IndexSNP          |                         | rs13306561 | Skin (MuTHER)                            | 2.36E-06         | 1   | 11788391 | ILMN_1734830    | MTHFR              | cis                         |       |        |                  |                |
| rs13306561 | DBP/SBP/MAP | MTHFR     | NPPB;NPPA-AS1;CLCN6;MTHFR;NPPA;AGTRAP | 1      | IndexSNP          |                         | rs13306561 | Subc adipose (MuTHER)                    | 5.98E-06         | 1   | 11788391 | ILMN_1734830    | MTHFR              | cis                         |       |        |                  |                |
| rs13306561 | DBP/SBP/MAP | MTHFR     | NPPB;NPPA-AS1;CLCN6;MTHFR;NPPA;AGTRAP | 1      | LDproxy (CEU-H3)  | 1                       | rs2050265  | Whole blood (CHARGE)                     | 2.21E-78         | 1   | 11802286 | 3990477         | MTHFR,Clorf167     | cis                         | 18.74 | T      | 1                | 11769609       |
| rs13306561 | DBP/SBP/MAP | MTHFR     | NPPB;NPPA-AS1;CLCN6;MTHFR;NPPA;AGTRAP | 1      | LDproxy (CEU-H3)  | 1                       | rs12567136 | Whole blood (CHARGE)                     | 2.64E-78         | 1   | 11806318 | 3990477         | MTHFR,Clorf167     | cis                         | 18.73 | G      | 1                | 11769609       |
| rs13306561 | DBP/SBP/MAP | MTHFR     | NPPB;NPPA-AS1;CLCN6;MTHFR;NPPA;AGTRAP | 1      | LDproxy (CEU-H3)  | 1                       | rs7537765  | Whole blood (CHARGE)                     | 3.23E-78         | 1   | 11809890 | 3990477         | MTHFR,Clorf167     | cis                         | 18.72 | G      | 1                | 11769609       |
| rs13306561 | DBP/SBP/MAP | MTHFR     | NPPB;NPPA-AS1;CLCN6;MTHFR;NPPA;AGTRAP | 1      | LDproxy (CEU-H3)  | 1                       | rs12567136 | LCL (MuTHER)                             | 5.77E-19         | 1   | 11806318 | ILMN_1734830    | MTHFR              | cis                         |       |        |                  |                |
| rs13306561 | DBP/SBP/MAP | MTHFR     | NPPB;NPPA-AS1;CLCN6;MTHFR;NPPA;AGTRAP | 1      | LDproxy (CEU-H3)  | 1                       | rs2050265  | LCL (MuTHER)                             | 8.49E-19         | 1   | 11802286 | ILMN_1734830    | MTHFR              | cis                         |       |        |                  |                |
| rs13306561 | DBP/SBP/MAP | MTHFR     | NPPB;NPPA-AS1;CLCN6;MTHFR;NPPA;AGTRAP | 1      | LDproxy (CEU-H3)  | 1                       | rs7537765  | LCL (MuTHER)                             | 2.10E-18         | 1   | 11809890 | ILMN_1734830    | MTHFR              | cis                         |       |        |                  |                |
| rs13306561 | DBP/SBP/MAP | MTHFR     | NPPB;NPPA-AS1;CLCN6;MTHFR;NPPA;AGTRAP | 1      | LDproxy (CEU-H3)  | 1                       | rs12567136 | Monocytes                                | 3.57E-14         | 1   | 11806318 |                 | MTHFR              | cis                         |       |        |                  |                |
| rs13306561 | DBP/SBP/MAP | MTHFR     | NPPB;NPPA-AS1;CLCN6;MTHFR;NPPA;AGTRAP | 1      | LDproxy (CEU-H3)  | 1                       | rs7537765  | Monocytes                                | 1.14E-13         | 1   | 11809890 |                 | MTHFR              | cis                         |       |        |                  |                |
| rs13306561 | DBP/SBP/MAP | MTHFR     | NPPB;NPPA-AS1;CLCN6;MTHFR;NPPA;AGTRAP | 1      | LDproxy (CEU-H3)  | 1                       | rs17037429 | Monocytes                                | 2.33E-13         | 1   | 11796374 |                 | MTHFR              | cis                         |       |        |                  |                |
| rs13306561 | DBP/SBP/MAP | MTHFR     | NPPB;NPPA-AS1;CLCN6;MTHFR;NPPA;AGTRAP | 1      | LDproxy (CEU-H3)  | 1                       | rs7537765  | PaxGeneWholeBlood(Mehta)                 | 8.44E-10         | 1   | 11809890 | ILMN_1731434    | MTHFR              | cis                         |       |        |                  |                |
| rs13306561 | DBP/SBP/MAP | MTHFR     | NPPB;NPPA-AS1;CLCN6;MTHFR;NPPA;AGTRAP | 1      | LDproxy (CEU-H3)  | 1                       | rs12567136 | Whole blood (PaxGene) in Japanese        | 1.20E-09         | 1   | 11806318 | A_23_P400081    | MTHFR              | cis                         | -0.63 |        |                  |                |
| rs13306561 | DBP/SBP/MAP | MTHFR     | NPPB;NPPA-AS1;CLCN6;MTHFR;NPPA;AGTRAP | 1      | LDproxy (CEU-H3)  | 1                       | rs2050265  | Whole blood (PaxGene) in Japanese        | 1.20E-09         | 1   | 11802286 | A_23_P400081    | MTHFR              | cis                         | 0.63  |        |                  |                |
| rs13306561 | DBP/SBP/MAP | MTHFR     | NPPB;NPPA-AS1;CLCN6;MTHFR;NPPA;AGTRAP | 1      | LDproxy (CEU-H3)  | 1                       | rs7537765  | Whole blood (PaxGene) in Japanese        | 1.20E-09         | 1   | 11787173 | A_23_P400081    | MTHFR              | cis                         | 0.63  |        |                  |                |
| rs13306561 | DBP/SBP/MAP | MTHFR     | NPPB;NPPA-AS1;CLCN6;MTHFR;NPPA;AGTRAP | 1      | LDproxy (CEU-H3)  | 1                       | rs12567136 | PaxGeneWholeBlood(Mehta)                 | 1.44E-09         | 1   | 11806318 | ILMN_1731434    | MTHFR              | cis                         |       |        |                  |                |
| rs13306561 | DBP/SBP/MAP | MTHFR     | NPPB;NPPA-AS1;CLCN6;MTHFR;NPPA;AGTRAP | 1      | LDproxy (CEU-H3)  | 1                       | rs7537765  | Whole blood (PaxGene) in Japanese        | 2.16E-09         | 1   | 11809890 | A_23_P400081    | MTHFR              | cis                         | 0.62  |        |                  |                |
| rs13306561 | DBP/SBP/MAP | MTHFR     | NPPB;NPPA-AS1;CLCN6;MTHFR;NPPA;AGTRAP | 1      | LDproxy (CEU-H3)  | 1                       | rs7537765  | SchadtLiver                              | 1.37E-07         | 1   | 11809890 |                 | CLCN6              | cis                         |       |        |                  |                |
| rs13306561 | DBP/SBP/MAP | MTHFR     | NPPB;NPPA-AS1;CLCN6;MTHFR;NPPA;AGTRAP | 1      | LDproxy (CEU-H3)  | 1                       | rs12567136 | Skin (MuTHER)                            | 1.44E-07         | 1   | 11806318 | ILMN_1734830    | MTHFR              | cis                         |       |        |                  |                |
| rs13306561 | DBP/SBP/MAP | MTHFR     | NPPB;NPPA-AS1;CLCN6;MTHFR;NPPA;AGTRAP | 1      | LDproxy (CEU-H3)  | 1                       | rs2050265  | Skin (MuTHER)                            | 1.50E-07         | 1   | 11802286 | ILMN_1734830    | MTHFR              | cis                         |       |        |                  |                |
| rs13306561 | DBP/SBP/MAP | MTHFR     | NPPB;NPPA-AS1;CLCN6;MTHFR;NPPA;AGTRAP | 1      | LDproxy (CEU-H3)  | 1                       | rs7537765  | Skin (MuTHER)                            | 3.50E-07         | 1   | 11809890 | ILMN_1734830    | MTHFR              | cis                         |       |        |                  |                |
| rs13306561 | DBP/SBP/MAP | MTHFR     | NPPB;NPPA-AS1;CLCN6;MTHFR;NPPA;AGTRAP | 1      | LDproxy (CEU-H3)  | 1                       | rs12567136 | Subc adipose (MuTHER)                    | 5.39E-07         | 1   | 11806318 | ILMN_1734830    | MTHFR              | cis                         |       |        |                  |                |
| rs13306561 | DBP/SBP/MAP | MTHFR     | NPPB;NPPA-AS1;CLCN6;MTHFR;NPPA;AGTRAP | 1      | LDproxy (CEU-H3)  | 1                       | rs2050265  | Subc adipose (MuTHER)                    | 6.63E-07         | 1   | 11802286 | ILMN_1734830    | MTHFR              | cis                         |       |        |                  |                |
| rs13306561 | DBP/SBP/MAP | MTHFR     | NPPB;NPPA-AS1;CLCN6;MTHFR;NPPA;AGTRAP | 1      | LDproxy (CEU-H3)  | 1                       | rs7537765  | Subc adipose (MuTHER)                    | 8.64E-07         | 1   | 11809890 | ILMN_1734830    | MTHFR              | cis                         |       |        |                  |                |
| rs13306561 | DBP/SBP/MAP | MTHFR     | NPPB;NPPA-AS1;CLCN6;MTHFR;NPPA;AGTRAP | 1      | LDproxy (CEU-H3)  | 1                       | rs7537765  | Liver(Greenawalt)                        | 1.02E-06         | 1   | 11809890 | 10023816366     | CLCN6              | cis                         |       |        |                  |                |
| rs13306561 | DBP/SBP/MAP | MTHFR     | NPPB;NPPA-AS1;CLCN6;MTHFR;NPPA;AGTRAP | 1      | LDproxy (CEU-H3)  | 1                       | rs7537765  | Lymph                                    | 1.67E-06         | 1   | 11809890 | GI_12025672-A   | CLCN6              | cis                         |       |        |                  |                |
| rs13306561 | DBP/SBP/MAP | MTHFR     | NPPB;NPPA-AS1;CLCN6;MTHFR;NPPA;AGTRAP | 1      | LDproxy (CEU-H3)  | 1                       | rs12567136 | Dendritic cells after Mycobacterium tube | 2.41E-06         | 1   | 11806318 |                 | MTHFR              | cis                         |       |        |                  |                |
| rs13306561 | DBP/SBP/MAP | MTHFR     | NPPB;NPPA-AS1;CLCN6;MTHFR;NPPA;AGTRAP | 1      | LDproxy (CEU-H3)  | 0.97                    | rs17037390 | Whole blood (CHARGE)                     | 7.04E-83         | 1   | 11783430 | 3990477         | MTHFR,Clorf167     | cis                         | 19.29 | A      | 1                | 11769609       |
| rs13306561 | DBP/SBP/MAP | MTHFR     | NPPB;NPPA-AS1;CLCN6;MTHFR;NPPA;AGTRAP | 1      | LDproxy (CEU-H3)  | 0.97                    | rs17367504 | Whole blood (CHARGE)                     | 2.88E-79         | 1   | 11785365 | 3990477         | MTHFR,Clorf167     | cis                         | 18.85 | G      | 1                | 11769609       |
| rs13306561 | DBP/SBP/MAP | MTHFR     | NPPB;NPPA-AS1;CLCN6;MTHFR;NPPA;AGTRAP | 1      | LDproxy (CEU-H3)  | 0.97                    | rs17037390 | LCL (MuTHER)                             | 5.45E-18         | 1   | 11783430 | ILMN_1734830    | MTHFR              | cis                         |       |        |                  |                |
| rs13306561 | DBP/SBP/MAP | MTHFR     | NPPB;NPPA-AS1;CLCN6;MTHFR;NPPA;AGTRAP | 1      | LDproxy (CEU-H3)  | 0.97                    | rs17367504 | LCL (MuTHER)                             | 7.40E-18         | 1   | 11785365 | ILMN_1734830    | MTHFR              | cis                         |       |        |                  |                |
| rs13306561 | DBP/SBP/MAP | MTHFR     | NPPB;NPPA-AS1;CLCN6;MTHFR;NPPA;AGTRAP | 1      | LDproxy (CEU-H3)  | 0.97                    | rs17037390 | Whole blood (PaxGene) in Japanese        | 1.20E-09         | 1   | 11783430 | A_23_P400081    | MTHFR              | cis                         | -0.63 |        |                  |                |
| rs13306561 | DBP/SBP/MAP | MTHFR     | NPPB;NPPA-AS1;CLCN6;MTHFR;NPPA;AGTRAP | 1      | LDproxy (CEU-H3)  | 0.97                    | rs17367504 | Whole blood (PaxGene) in Japanese        | 1.20E-09         | 1   | 11785365 | A_23_P400081    | MTHFR              | cis                         | 0.63  |        |                  |                |
| rs13306561 | DBP/SBP/MAP | MTHFR     | NPPB;NPPA-AS1;CLCN6;MTHFR;NPPA;AGTRAP | 1      | LDproxy (CEU-H3)  | 0.97                    | rs17037390 | Subc adipose (MuTHER)                    | 2.66E-07         | 1   | 11783430 | ILMN_1734830    | MTHFR              | cis                         |       |        |                  |                |
| rs13306561 | DBP/SBP/MAP | MTHFR     | NPPB;NPPA-AS1;CLCN6;MTHFR;NPPA;AGTRAP | 1      | LDproxy (CEU-H3)  | 0.97                    | rs17037390 | Skin (MuTHER)                            | 5.16E-07         | 1   | 11783430 | ILMN_1734830    | MTHFR              | cis                         |       |        |                  |                |
| rs13306561 | DBP/SBP/MAP | MTHFR     | NPPB;NPPA-AS1;CLCN6;MTHFR;NPPA;AGTRAP | 1      | LDproxy (CEU-H3)  | 0.97                    | rs17367504 | Subc adipose (MuTHER)                    | 6.16E-07         | 1   | 11785365 | ILMN_1734830    | MTHFR              | cis                         |       |        |                  |                |
| rs13306561 | DBP/SBP/MAP | MTHFR     | NPPB;NPPA-AS1;CLCN6;MTHFR;NPPA;AGTRAP | 1      | LDproxy (CEU-H3)  | 0.97                    | rs17367504 | Skin (MuTHER)                            | 7.50E-07         | 1   | 11785365 | ILMN_1734830    | MTHFR              | cis                         |       |        |                  |                |
| rs13306561 | DBP/SBP/MAP | MTHFR     | NPPB;NPPA-AS1;CLCN6;MTHFR;NPPA;AGTRAP | 1      | LDproxy (CEU-H3)  | 0.97                    | rs17367504 | Liver (ScanDB)                           | 9.54E-07         | 1   | 11785365 |                 | GPR116             | cis                         |       |        |                  |                |
| rs13306561 | DBP/SBP/MAP | MTHFR     | NPPB;NPPA-AS1;CLCN6;MTHFR;NPPA;AGTRAP | 1      | LDproxy (CEU-H3)  | 0.97                    | rs17367504 | Lymph                                    | 1.54E-05         | 1   | 11785365 | GI_12025672-A   | CLCN6              | cis                         |       |        |                  |                |
| rs13306561 | DBP/SBP/MAP | MTHFR     | NPPB;NPPA-AS1;CLCN6;MTHFR;NPPA;AGTRAP | 1      | LDproxy (CEU-H3)  | 0.97                    | rs17367504 | omental                                  | 7.21E-05         | 1   | 11785365 | 10025934633     | HSS00048903        | cis                         |       |        |                  |                |
| rs13306561 | DBP/SBP/MAP | MTHFR     | NPPB;NPPA-AS1;CLCN6;MTHFR;NPPA;AGTRAP | 1      | LDproxy (CEU-H3)  | 0.97                    | rs17367504 | Blood(Fehrmann et al)                    | 1.50E-27;1.9E-19 | 1   | 11785365 | 3990477;3850136 | MTHFR;AL953897.6;C | cis                         |       |        |                  |                |
| rs13306561 | DBP/SBP/MAP | MTHFR     | NPPB;NPPA-AS1;CLCN6;MTHFR;NPPA;AGTRAP | 1      | LDproxy (CEU-1kg) | 0.947                   | rs17037452 | LCL (MuTHER)                             | 6.00E-24         | 1   | 11818262 | ILMN_1734830    | MTHFR              | cis                         |       |        |                  |                |
| rs13306561 | DBP/SBP/MAP | MTHFR     | NPPB;NPPA-AS1;CLCN6;MTHFR;NPPA;AGTRAP | 1      | LDproxy (CEU-1kg) | 0.947                   | rs17037452 | Whole blood (PaxGene) in Japanese        | 1.20E-09         | 1   | 11818262 | A_23_P400081    | MTHFR              | cis                         | 0.63  |        |                  |                |
| rs13306561 | DBP/SBP/MAP | MTHFR     | NPPB;NPPA-AS1;CLCN6;MTHFR;NPPA;AGTRAP | 1      | LDproxy (CEU-1kg) | 0.947                   | rs17037452 | Skin (MuTHER)                            | 3.72E-09         | 1   | 11818262 | ILMN_1734830    | MTHFR              | cis                         |       |        |                  |                |
| rs13306561 | DBP/SBP/MAP | MTHFR     | NPPB;NPPA-AS1;CLCN6;MTHFR;NPPA;AGTRAP | 1      | LDproxy (CEU-1kg) | 0.947                   | rs17037452 | Subc adipose (MuTHER)                    | 1.56E-07         | 1   | 11818262 | ILMN_1741594    | CLCN6              | cis                         |       |        |                  |                |
| rs13306561 | DBP/SBP/MAP | MTHFR     | NPPB;NPPA-AS1;CLCN6;MTHFR;NPPA;AGTRAP | 1      | LDproxy (CEU-1kg) | 0.947                   | rs17037452 | Whole blood (CHARGE)                     | 1.66E-07         | 1   | 11818262 | 60437           | PLOD1              | cis                         | -5.23 | G      | 1                | 11958130       |
| rs13306561 | DBP/SBP/MAP | MTHFR     | NPPB;NPPA-AS1;CLCN6;MTHFR;NPPA;AGTRAP | 1      | LDproxy (CEU-H3)  | 0.853                   | rs17037425 | Whole blood (CHARGE)                     | 7.97E-95         | 1   | 11792970 | 3990477         | MTHFR,Clorf167     | cis                         | 20.66 | A      | 1                | 11769609       |
| rs13306561 | DBP/SBP/MAP | MTHFR     | NPPB;NPPA-AS1;CLCN6;MTHFR;NPPA;AGTRAP | 1      | LDproxy (CEU-H3)  | 0.853                   | rs17037425 | LCL (MuTHER)                             | 5.98E-20         | 1   | 11792970 | ILMN_1734830    | MTHFR              | cis                         |       |        |                  |                |
| rs13306561 | DBP/SBP/MAP | MTHFR     | NPPB;NPPA-AS1;CLCN6;MTHFR;NPPA;AGTRAP | 1      | LDproxy (CEU-H3)  | 0.853                   | rs17037425 | Whole blood (PaxGene) in Japanese        | 1.20E-09         | 1   | 11792970 | A_23_P400081    | MTHFR              | cis                         | -0.63 |        |                  |                |
| rs13306561 | DBP/SBP/MAP | MTHFR     | NPPB;NPPA-AS1;CLCN6;MTHFR;NPPA;AGTRAP | 1      | LDproxy (CEU-H3)  | 0.853                   | rs17037425 | Skin (MuTHER)                            | 1.03E-08         | 1   | 11792970 | ILMN_1734830    | MTHFR              | cis                         |       |        |                  |                |
| rs13306561 | DBP/SBP/MAP | MTHFR     | NPPB;NPPA-AS1;CLCN6;MTHFR;NPPA;AGTRAP | 1      | LDproxy (CEU-H3)  | 0.853                   | rs17037425 | Subc adipose (MuTHER)                    | 2.22E-08         | 1   | 11792970 | ILMN_1734830    | MTHFR              | cis                         |       |        |                  |                |
| rs13306561 | DBP/SBP/MAP | MTHFR     | NPPB;NPPA-AS1;CLCN6;MTHFR;NPPA;AGTRAP | 1      | LDproxy (CEU-H3)  | 0.853                   | rs17037425 | Liver(Chicago)                           | 0.00017275       | 1   | 11792970 | A_24_P302374    | CLCN6              | cis                         |       |        |                  |                |
| rs13306561 | DBP/SBP/MAP | MTHFR     | NPPB;NPPA-AS1;CLCN6;MTHFR;NPPA;AGTRAP | 1      | LDproxy (CEU-H3)  | 0.713                   | rs7553194  | LCL (MuTHER)                             | 2.97E-24         | 1   |          |                 |                    |                             |       |        |                  |                |



| IndexSNP   | Traits      | InRefGene | RefGenes60kb                          | Locus# | Index/LD status   | r <sup>2</sup> to index | eSNPid    | Tissue                            | eSNP P value     | Chr | B36pos    | ArrayID         | Transcript        | type of eQTL (cis or trans) | Beta  | Allele | Probe Chromosome | Probe Position |
|------------|-------------|-----------|---------------------------------------|--------|-------------------|-------------------------|-----------|-----------------------------------|------------------|-----|-----------|-----------------|-------------------|-----------------------------|-------|--------|------------------|----------------|
| rs13306561 | DBP/SBP/MAP | MTHFR     | NPPB;NPPA-AS1;CLCN6;MTHFR;NPPA;AGTRAP | 1      | LDproxy(CEU-H3)   | 0.713                   | rs2236797 | LCL (MuTHER)                      | 5.44E-24         | 1   | 11815237  | ILMN_1734830    | MTHFR             | cis                         |       |        |                  |                |
| rs13306561 | DBP/SBP/MAP | MTHFR     | NPPB;NPPA-AS1;CLCN6;MTHFR;NPPA;AGTRAP | 1      | LDproxy(CEU-H3)   | 0.713                   | rs2075538 | LCL (MuTHER)                      | 5.56E-24         | 1   | 11819189  | ILMN_1734830    | MTHFR             | cis                         |       |        |                  |                |
| rs13306561 | DBP/SBP/MAP | MTHFR     | NPPB;NPPA-AS1;CLCN6;MTHFR;NPPA;AGTRAP | 1      | LDproxy(CEU-H3)   | 0.713                   | rs2236797 | PaxGeneWholeBlood(Mehta)          | 1.64E-11         | 1   | 11815237  | ILMN_1731434    | MTHFR             | cis                         |       |        |                  |                |
| rs13306561 | DBP/SBP/MAP | MTHFR     | NPPB;NPPA-AS1;CLCN6;MTHFR;NPPA;AGTRAP | 1      | LDproxy(CEU-H3)   | 0.713                   | rs2075538 | Whole blood (PaxGene) in Japanese | 7.49E-10         | 1   | 11819189  | A_23_P400081    | MTHFR             | cis                         | 0.64  |        |                  |                |
| rs13306561 | DBP/SBP/MAP | MTHFR     | NPPB;NPPA-AS1;CLCN6;MTHFR;NPPA;AGTRAP | 1      | LDproxy(CEU-H3)   | 0.713                   | rs2236797 | Whole blood (PaxGene) in Japanese | 1.20E-09         | 1   | 11815237  | A_23_P400081    | MTHFR             | cis                         | -0.63 |        |                  |                |
| rs13306561 | DBP/SBP/MAP | MTHFR     | NPPB;NPPA-AS1;CLCN6;MTHFR;NPPA;AGTRAP | 1      | LDproxy(CEU-H3)   | 0.713                   | rs7553194 | Whole blood (PaxGene) in Japanese | 1.20E-09         | 1   | 11786736  | A_23_P400081    | MTHFR             | cis                         | -0.63 |        |                  |                |
| rs13306561 | DBP/SBP/MAP | MTHFR     | NPPB;NPPA-AS1;CLCN6;MTHFR;NPPA;AGTRAP | 1      | LDproxy(CEU-H3)   | 0.713                   | rs7553194 | Skin (MuTHER)                     | 2.04E-09         | 1   | 11786736  | ILMN_1734830    | MTHFR             | cis                         |       |        |                  |                |
| rs13306561 | DBP/SBP/MAP | MTHFR     | NPPB;NPPA-AS1;CLCN6;MTHFR;NPPA;AGTRAP | 1      | LDproxy(CEU-H3)   | 0.713                   | rs2075538 | RNAseq(HapMapLCL)+DeepSage(blood) | 3.48E-09         | 1   | 11896602  | ENST0000037659  | MTHFR             | cis                         |       |        |                  |                |
| rs13306561 | DBP/SBP/MAP | MTHFR     | NPPB;NPPA-AS1;CLCN6;MTHFR;NPPA;AGTRAP | 1      | LDproxy(CEU-H3)   | 0.713                   | rs2075538 | Skin (MuTHER)                     | 3.56E-09         | 1   | 11819189  | ILMN_1734830    | MTHFR             | cis                         |       |        |                  |                |
| rs13306561 | DBP/SBP/MAP | MTHFR     | NPPB;NPPA-AS1;CLCN6;MTHFR;NPPA;AGTRAP | 1      | LDproxy(CEU-H3)   | 0.713                   | rs2236797 | Skin (MuTHER)                     | 3.63E-09         | 1   | 11815237  | ILMN_1734830    | MTHFR             | cis                         |       |        |                  |                |
| rs13306561 | DBP/SBP/MAP | MTHFR     | NPPB;NPPA-AS1;CLCN6;MTHFR;NPPA;AGTRAP | 1      | LDproxy(CEU-H3)   | 0.713                   | rs2075538 | Whole blood (CHARGE)              | 1.32E-07         | 1   | 11819189  | 60437           | PLOD1             | cis                         | -5.28 | C      | 1                | 11958130       |
| rs13306561 | DBP/SBP/MAP | MTHFR     | NPPB;NPPA-AS1;CLCN6;MTHFR;NPPA;AGTRAP | 1      | LDproxy(CEU-H3)   | 0.713                   | rs7553194 | Whole blood (CHARGE)              | 1.46E-07         | 1   | 11786736  | 60437           | PLOD1             | cis                         | -5.26 | A      | 1                | 11958130       |
| rs13306561 | DBP/SBP/MAP | MTHFR     | NPPB;NPPA-AS1;CLCN6;MTHFR;NPPA;AGTRAP | 1      | LDproxy(CEU-H3)   | 0.713                   | rs2236797 | Subc adipose (MuTHER)             | 1.65E-07         | 1   | 11815237  | ILMN_1741594    | CLCN6             | cis                         |       |        |                  |                |
| rs13306561 | DBP/SBP/MAP | MTHFR     | NPPB;NPPA-AS1;CLCN6;MTHFR;NPPA;AGTRAP | 1      | LDproxy(CEU-H3)   | 0.713                   | rs2075538 | Subc adipose (MuTHER)             | 1.75E-07         | 1   | 11819189  | ILMN_1741594    | CLCN6             | cis                         |       |        |                  |                |
| rs13306561 | DBP/SBP/MAP | MTHFR     | NPPB;NPPA-AS1;CLCN6;MTHFR;NPPA;AGTRAP | 1      | LDproxy(CEU-H3)   | 0.713                   | rs2236797 | Whole blood (CHARGE)              | 3.42E-07         | 1   | 11815237  | 60437           | PLOD1             | cis                         | -5.10 | T      | 1                | 11958130       |
| rs13306561 | DBP/SBP/MAP | MTHFR     | NPPB;NPPA-AS1;CLCN6;MTHFR;NPPA;AGTRAP | 1      | LDproxy(CEU-H3)   | 0.713                   | rs7553194 | Subc adipose (MuTHER)             | 4.13E-07         | 1   | 11786736  | ILMN_1741594    | CLCN6             | cis                         |       |        |                  |                |
| rs13306561 | DBP/SBP/MAP | MTHFR     | NPPB;NPPA-AS1;CLCN6;MTHFR;NPPA;AGTRAP | 1      | LDproxy(CEU-H3)   | 0.713                   | rs7553194 | Lung                              | 2.34E-06         | 1   | 11786736  | 100146210_TGI_ε | Unknown           | cis                         |       |        |                  |                |
| rs13306561 | DBP/SBP/MAP | MTHFR     | NPPB;NPPA-AS1;CLCN6;MTHFR;NPPA;AGTRAP | 1      | LDproxy(CEU-H3)   | 0.713                   | rs7553194 | Monocytes (CD14+)                 | 1.45E-05         | 1   | 11786736  | TKVCu2UleS247   | CLCN6             | cis                         |       |        |                  |                |
| rs13306561 | DBP/SBP/MAP | MTHFR     | NPPB;NPPA-AS1;CLCN6;MTHFR;NPPA;AGTRAP | 1      | LDproxy(CEU-H3)   | 0.713                   | rs2236797 | Monocytes (CD14+)                 | 5.10E-05         | 1   | 11815237  | TKVCu2UleS247   | CLCN6             | cis                         |       |        |                  |                |
| rs13306561 | DBP/SBP/MAP | MTHFR     | NPPB;NPPA-AS1;CLCN6;MTHFR;NPPA;AGTRAP | 1      | LDproxy(CEU-H3)   | 0.713                   | rs2236797 | Lymph                             | 0.00104498       | 1   | 11815237  | GI_12025672-A   | CLCN6             | cis                         |       |        |                  |                |
| rs13306561 | DBP/SBP/MAP | MTHFR     | NPPB;NPPA-AS1;CLCN6;MTHFR;NPPA;AGTRAP | 1      | LDproxy(CEU-H3)   | 0.713                   | rs2075538 | Monocytes                         | 1.43E-34;1.2E-1  | 1   | 11819189  |                 | MTHFR;CLCN6       | cis                         |       |        |                  |                |
| rs13306561 | DBP/SBP/MAP | MTHFR     | NPPB;NPPA-AS1;CLCN6;MTHFR;NPPA;AGTRAP | 1      | LDproxy(CEU-H3)   | 0.713                   | rs2236797 | Blood(Fehrmann et al)             | 4.70E-45;2.3E-1  | 1   | 11815237  | 3990477;Human   | MTHFR;AL53897.6;A | cis                         |       |        |                  |                |
| rs2004776  | DBP/MAP     | AGT       | COG2;AGT;CAPN9                        | 2      | indexSNP          |                         | rs2004776 | Cerebellum (ScanDB)               | 2.19E-09         | 1   | 228915325 |                 | AGT               | cis                         |       |        |                  |                |
| rs2004776  | DBP/MAP     | AGT       | COG2;AGT;CAPN9                        | 2      | LDproxy(CEU-H3)   | 0.754                   | rs1326888 | Cerebellum (ScanDB)               | 5.13E-10         | 1   | 228929783 |                 | AGT               | cis                         |       |        |                  |                |
| rs7599598  | DBP         | FER1L5    | LMAN2L;KIAA1310;FER1L5                | 3      | IndexSNP          |                         | rs7599598 | Lung                              | 2.17E-09         | 2   | 96715567  | 100134941_TGI_ε | CNNM4             | cis                         |       |        |                  |                |
| rs7599598  | DBP         | FER1L5    | LMAN2L;KIAA1310;FER1L5                | 3      | IndexSNP          |                         | rs7599598 | Whole blood (CHARGE)              | 5.38E-08         | 2   | 96715567  | 1190673         | LMAN2L            | cis                         | -5.44 | A      | 2                | 96735621       |
| rs7599598  | DBP         | FER1L5    | LMAN2L;KIAA1310;FER1L5                | 3      | IndexSNP          |                         | rs7599598 | Blood(Fehrmann et al)             | 1.70E-04         | 2   | 96715567  | 1190673         | LMAN2L            | cis                         |       |        |                  |                |
| rs7599598  | DBP         | FER1L5    | LMAN2L;KIAA1310;FER1L5                | 3      | IndexSNP          |                         | rs7599598 | Bcells (CD19+)                    | 0.0008951        | 2   | 96715567  | FQbX2eUv1EhIe   | ARID5A            | cis                         |       |        |                  |                |
| rs7599598  | DBP         | FER1L5    | LMAN2L;KIAA1310;FER1L5                | 3      | IndexSNP          |                         | rs7599598 | Lymph                             | 0.00281896       | 2   | 96715567  | GI_13540593-S   | LMAN2L            | cis                         |       |        |                  |                |
| rs7599598  | DBP         | FER1L5    | LMAN2L;KIAA1310;FER1L5                | 3      | LDproxy(CEU-H3)   | 0.806                   | rs7582249 | Whole blood (CHARGE)              | 2.20E-09         | 2   | 96827256  | 1190673         | LMAN2L            | cis                         | 5.98  | A      | 2                | 96735621       |
| rs7599598  | DBP         | FER1L5    | LMAN2L;KIAA1310;FER1L5                | 3      | LDproxy(CEU-H3)   | 0.806                   | rs7582249 | Skin (MuTHER)                     | 5.64E-06         | 2   | 96827256  | ILMN_1755221    | LMAN2L            | cis                         |       |        |                  |                |
| rs7599598  | DBP         | FER1L5    | LMAN2L;KIAA1310;FER1L5                | 3      | LDproxy(CEU-H3)   | 0.791                   | rs6727384 | Whole blood (Battle)              | 4.91E-46         | 2   | 97400324  |                 | CNNM4             | cis                         |       |        |                  |                |
| rs7599598  | DBP         | FER1L5    | LMAN2L;KIAA1310;FER1L5                | 3      | LDproxy(CEU-H3)   | 0.791                   | rs968470  | Whole blood (CHARGE)              | 2.52E-09         | 2   | 96787353  | 1190673         | LMAN2L            | cis                         | 5.96  | C      | 2                | 96735621       |
| rs7599598  | DBP         | FER1L5    | LMAN2L;KIAA1310;FER1L5                | 3      | LDproxy(CEU-H3)   | 0.791                   | rs7608661 | Whole blood (CHARGE)              | 3.01E-09         | 2   | 96823647  | 1190673         | LMAN2L            | cis                         | 5.93  | G      | 2                | 96735621       |
| rs7599598  | DBP         | FER1L5    | LMAN2L;KIAA1310;FER1L5                | 3      | LDproxy(CEU-H3)   | 0.791                   | rs6727384 | Whole blood (CHARGE)              | 3.03E-09         | 2   | 96764051  | 1190673         | LMAN2L            | cis                         | 5.93  | G      | 2                | 96735621       |
| rs7599598  | DBP         | FER1L5    | LMAN2L;KIAA1310;FER1L5                | 3      | LDproxy(CEU-H3)   | 0.791                   | rs7608661 | Blood(Fehrmann et al)             | 5.10E-06         | 2   | 96823647  | 1190673         | LMAN2L            | cis                         |       |        |                  |                |
| rs7599598  | DBP         | FER1L5    | LMAN2L;KIAA1310;FER1L5                | 3      | LDproxy(CEU-H3)   | 0.791                   | rs7608661 | Skin (MuTHER)                     | 5.41E-06         | 2   | 96823647  | ILMN_1755221    | LMAN2L            | cis                         |       |        |                  |                |
| rs7599598  | DBP         | FER1L5    | LMAN2L;KIAA1310;FER1L5                | 3      | LDproxy(CEU-H3)   | 0.791                   | rs6727384 | Skin (MuTHER)                     | 5.63E-06         | 2   | 96764051  | ILMN_1755221    | LMAN2L            | cis                         |       |        |                  |                |
| rs7599598  | DBP         | FER1L5    | LMAN2L;KIAA1310;FER1L5                | 3      | LDproxy(CEU-H3)   | 0.791                   | rs968470  | Skin (MuTHER)                     | 5.79E-06         | 2   | 96787353  | ILMN_1755221    | LMAN2L            | cis                         |       |        |                  |                |
| rs7599598  | DBP         | FER1L5    | LMAN2L;KIAA1310;FER1L5                | 3      | LDproxy(CEU-H3)   | 0.791                   | rs7608661 | Cerebellum (all samples)          | 1.79E-05         | 2   | 96823647  | 10025902983     | LMAN2L            | cis                         |       |        |                  |                |
| rs7599598  | DBP         | FER1L5    | LMAN2L;KIAA1310;FER1L5                | 3      | LDproxy(CEU-H3)   | 0.791                   | rs968470  | Lymph                             | 0.00232082       | 2   | 96787353  | GI_13540593-S   | LMAN2L            | cis                         |       |        |                  |                |
| rs7599598  | DBP         | FER1L5    | LMAN2L;KIAA1310;FER1L5                | 3      | LDproxy(CEU-H3)   | 0.791                   | rs968470  | Prefrontal cortex (all samples)   | 3.50E-02         | 2   | 96787353  | 10025902983     | LMAN2L            | cis                         |       |        |                  |                |
| rs7599598  | DBP         | FER1L5    | LMAN2L;KIAA1310;FER1L5                | 3      | LDproxy(CEU-H3)   | 0.791                   | rs7608661 | omental                           | 7.82E-09;2.21E-1 | 2   | 96823647  | 10023820566;100 | CNNM4;LMAN2L;AN   | cis                         |       |        |                  |                |
| rs7599598  | DBP         | FER1L5    | LMAN2L;KIAA1310;FER1L5                | 3      | LDproxy(CEU-1kg)  | 0.771                   | rs994430  | Whole blood (CHARGE)              | 2.78E-09         | 2   | 96802728  | 1190673         | LMAN2L            | cis                         | 5.94  | T      | 2                | 96735621       |
| rs7599598  | DBP         | FER1L5    | LMAN2L;KIAA1310;FER1L5                | 3      | LDproxy(CEU-1kg)  | 0.771                   | rs994430  | Skin (MuTHER)                     | 5.66E-06         | 2   | 96802728  | ILMN_1755221    | LMAN2L            | cis                         |       |        |                  |                |
| rs7599598  | DBP         | FER1L5    | LMAN2L;KIAA1310;FER1L5                | 3      | LDproxy(CEU-Rel2) | 0.757                   | rs6730773 | Lung                              | 1.74E-09         | 2   | 96805370  | 100141976_TGI_ε | LMAN2L            | cis                         |       |        |                  |                |
| rs7599598  | DBP         | FER1L5    | LMAN2L;KIAA1310;FER1L5                | 3      | LDproxy(CEU-Rel2) | 0.757                   | rs1318597 | Whole blood (CHARGE)              | 2.40E-09         | 2   | 96826822  | 1190673         | LMAN2L            | cis                         | 5.97  | C      | 2                | 96735621       |
| rs7599598  | DBP         | FER1L5    | LMAN2L;KIAA1310;FER1L5                | 3      | LDproxy(CEU-Rel2) | 0.757                   | rs6730773 | Whole blood (CHARGE)              | 3.04E-09         | 2   | 96805370  | 1190673         | LMAN2L            | cis                         | 5.93  | G      | 2                | 96735621       |
| rs7599598  | DBP         | FER1L5    | LMAN2L;KIAA1310;FER1L5                | 3      | LDproxy(CEU-Rel2) | 0.757                   | rs7586317 | Whole blood (CHARGE)              | 3.21E-09         | 2   | 96811558  | 1190673         | LMAN2L            | cis                         | 5.92  | A      | 2                | 96735621       |
| rs7599598  | DBP         | FER1L5    | LMAN2L;KIAA1310;FER1L5                | 3      | LDproxy(CEU-Rel2) | 0.757                   | rs1318597 | Skin (MuTHER)                     | 5.64E-06         | 2   | 96826822  | ILMN_1755221    | LMAN2L            | cis                         |       |        |                  |                |
| rs7599598  | DBP         | FER1L5    | LMAN2L;KIAA1310;FER1L5                | 3      | LDproxy(CEU-Rel2) | 0.757                   | rs7586317 | Skin (MuTHER)                     | 5.66E-06         | 2   | 96811558  | ILMN_1755221    | LMAN2L            | cis                         |       |        |                  |                |
| rs7599598  | DBP         | FER1L5    | LMAN2L;KIAA1310;FER1L5                | 3      | LDproxy(CEU-Rel2) | 0.757                   | rs6730773 | Skin (MuTHER)                     | 5.67E-06         | 2   | 96805370  | ILMN_1755221    | LMAN2L            | cis                         |       |        |                  |                |
| rs7599598  | DBP         | FER1L5    | LMAN2L;KIAA1310;FER1L5                | 3      | LDproxy(CEU-1kg)  | 0.735                   | rs6576984 | Whole blood (CHARGE)              | 1.39E-08         | 2   | 96818432  | 1190673         | LMAN2L            | cis                         | 5.68  | T      | 2                | 96735621       |
| rs7599598  | DBP         | FER1L5    | LMAN2L;KIAA1310;FER1L5                | 3      | LDproxy(CEU-1kg)  | 0.735                   | rs6576984 | Skin (MuTHER)                     | 6.41E-06         | 2   | 96818432  | ILMN_1755221    | LMAN2L            | cis                         |       |        |                  |                |
| rs7650227  | PP          | ULK4      | ULK4                                  | 4      | IndexSNP          |                         | rs7650227 | Intestine (normal ileum)          | 2.98E-05         | 3   | 41794937  |                 | ULK4              | cis                         |       |        |                  |                |
| rs7650227  | PP          | ULK4      | ULK4                                  | 4      | LDproxy(CEU-1kg)  | 1                       | rs1615243 | Whole blood (Battle)              | 2.92E-190        | 3   | 41965234  |                 | ULK4              | cis                         |       |        |                  |                |
| rs7650227  | PP          | ULK4      | ULK4                                  | 4      | LDproxy(CEU-1kg)  | 1                       | rs1052501 | omental                           | 4.79E-21         | 3   | 41900402  | 10025919071     | CTNNB1            | cis                         |       |        |                  |                |
| rs7650227  | PP          | ULK4      | ULK4                                  | 4      | LDproxy(CEU-1kg)  | 1                       | rs3934103 | Prefrontal cortex (all samples)   | 1.05E-19         | 3   | 41952218  | 10023809218     | ULK4              |                             |       |        |                  |                |

| IndexSNP  | Traits | InRefGene | RefGenes60kb | Locus# | Index/LD status  | r <sup>2</sup> to index | eSNPid     | Tissue                       | eSNP P value | Chr | B36pos   | ArrayID     | Transcript | type of eQTL (cis or trans) | Beta | Allele | Probe Chromosome | Probe Position |
|-----------|--------|-----------|--------------|--------|------------------|-------------------------|------------|------------------------------|--------------|-----|----------|-------------|------------|-----------------------------|------|--------|------------------|----------------|
| rs7650227 | PP     | ULK4      | ULK4         | 4      | LDproxy(CEU-1kg) | 1                       | rs1716642  | Parietal lobe (ScanDB)       | 6.48E-17     | 3   | 41940869 |             | ULK4       | cis                         |      |        |                  |                |
| rs7650227 | PP     | ULK4      | ULK4         | 4      | LDproxy(CEU-1kg) | 1                       | rs2272007  | Parietal lobe (ScanDB)       | 7.20E-17     | 3   | 41971140 |             | ULK4       | cis                         |      |        |                  |                |
| rs7650227 | PP     | ULK4      | ULK4         | 4      | LDproxy(CEU-1kg) | 1                       | rs9856633  | Parietal lobe (ScanDB)       | 7.20E-17     | 3   | 41988854 |             | ULK4       | cis                         |      |        |                  |                |
| rs7650227 | PP     | ULK4      | ULK4         | 4      | LDproxy(CEU-1kg) | 1                       | rs1717020  | Parietal lobe (ScanDB)       | 7.21E-17     | 3   | 41956494 |             | ULK4       | cis                         |      |        |                  |                |
| rs7650227 | PP     | ULK4      | ULK4         | 4      | LDproxy(CEU-1kg) | 1                       | rs1717024  | Parietal lobe (ScanDB)       | 7.21E-17     | 3   | 41959892 |             | ULK4       | cis                         |      |        |                  |                |
| rs7650227 | PP     | ULK4      | ULK4         | 4      | LDproxy(CEU-1kg) | 1                       | rs10212536 | Parietal lobe (ScanDB)       | 2.54E-16     | 3   | 41802030 |             | ULK4       | cis                         |      |        |                  |                |
| rs7650227 | PP     | ULK4      | ULK4         | 4      | LDproxy(CEU-1kg) | 1                       | rs1052501  | Parietal lobe (ScanDB)       | 2.54E-16     | 3   | 42000386 |             | ULK4       | cis                         |      |        |                  |                |
| rs7650227 | PP     | ULK4      | ULK4         | 4      | LDproxy(CEU-1kg) | 1                       | rs13325965 | Parietal lobe (ScanDB)       | 2.54E-16     | 3   | 41889946 |             | ULK4       | cis                         |      |        |                  |                |
| rs7650227 | PP     | ULK4      | ULK4         | 4      | LDproxy(CEU-1kg) | 1                       | rs17062109 | Parietal lobe (ScanDB)       | 2.54E-16     | 3   | 41785368 |             | ULK4       | cis                         |      |        |                  |                |
| rs7650227 | PP     | ULK4      | ULK4         | 4      | LDproxy(CEU-1kg) | 1                       | rs1716685  | Parietal lobe (ScanDB)       | 2.54E-16     | 3   | 41900305 |             | ULK4       | cis                         |      |        |                  |                |
| rs7650227 | PP     | ULK4      | ULK4         | 4      | LDproxy(CEU-1kg) | 1                       | rs1717000  | Parietal lobe (ScanDB)       | 2.54E-16     | 3   | 41905223 |             | ULK4       | cis                         |      |        |                  |                |
| rs7650227 | PP     | ULK4      | ULK4         | 4      | LDproxy(CEU-1kg) | 1                       | rs1717006  | Parietal lobe (ScanDB)       | 2.54E-16     | 3   | 41915452 |             | ULK4       | cis                         |      |        |                  |                |
| rs7650227 | PP     | ULK4      | ULK4         | 4      | LDproxy(CEU-1kg) | 1                       | rs1717017  | Parietal lobe (ScanDB)       | 2.54E-16     | 3   | 41890620 |             | ULK4       | cis                         |      |        |                  |                |
| rs7650227 | PP     | ULK4      | ULK4         | 4      | LDproxy(CEU-1kg) | 1                       | rs6796210  | Parietal lobe (ScanDB)       | 2.54E-16     | 3   | 41826722 |             | ULK4       | cis                         |      |        |                  |                |
| rs7650227 | PP     | ULK4      | ULK4         | 4      | LDproxy(CEU-1kg) | 1                       | rs6803652  | Parietal lobe (ScanDB)       | 2.54E-16     | 3   | 41799560 |             | ULK4       | cis                         |      |        |                  |                |
| rs7650227 | PP     | ULK4      | ULK4         | 4      | LDproxy(CEU-1kg) | 1                       | rs7648578  | Parietal lobe (ScanDB)       | 2.54E-16     | 3   | 41833735 |             | ULK4       | cis                         |      |        |                  |                |
| rs7650227 | PP     | ULK4      | ULK4         | 4      | LDproxy(CEU-1kg) | 1                       | rs9839399  | Parietal lobe (ScanDB)       | 2.54E-16     | 3   | 41903048 |             | ULK4       | cis                         |      |        |                  |                |
| rs7650227 | PP     | ULK4      | ULK4         | 4      | LDproxy(CEU-1kg) | 1                       | rs1016669  | Parietal lobe (ScanDB)       | 2.55E-16     | 3   | 41869444 |             | ULK4       | cis                         |      |        |                  |                |
| rs7650227 | PP     | ULK4      | ULK4         | 4      | LDproxy(CEU-1kg) | 1                       | rs2128834  | Parietal lobe (ScanDB)       | 2.55E-16     | 3   | 41837649 |             | ULK4       | cis                         |      |        |                  |                |
| rs7650227 | PP     | ULK4      | ULK4         | 4      | LDproxy(CEU-1kg) | 1                       | rs3774372  | Parietal lobe (ScanDB)       | 2.55E-16     | 3   | 41852418 |             | ULK4       | cis                         |      |        |                  |                |
| rs7650227 | PP     | ULK4      | ULK4         | 4      | LDproxy(CEU-1kg) | 1                       | rs6791806  | Parietal lobe (ScanDB)       | 2.55E-16     | 3   | 41864999 |             | ULK4       | cis                         |      |        |                  |                |
| rs7650227 | PP     | ULK4      | ULK4         | 4      | LDproxy(CEU-1kg) | 1                       | rs9873207  | Parietal lobe (ScanDB)       | 2.55E-16     | 3   | 41859754 |             | ULK4       | cis                         |      |        |                  |                |
| rs7650227 | PP     | ULK4      | ULK4         | 4      | LDproxy(CEU-1kg) | 1                       | rs9867627  | Parietal lobe (ScanDB)       | 2.73E-16     | 3   | 41770845 |             | ULK4       | cis                         |      |        |                  |                |
| rs7650227 | PP     | ULK4      | ULK4         | 4      | LDproxy(CEU-1kg) | 1                       | rs6599175  | Parietal lobe (ScanDB)       | 2.80E-16     | 3   | 41761013 |             | ULK4       | cis                         |      |        |                  |                |
| rs7650227 | PP     | ULK4      | ULK4         | 4      | LDproxy(CEU-1kg) | 1                       | rs9854833  | Parietal lobe (ScanDB)       | 4.38E-16     | 3   | 41750581 |             | ULK4       | cis                         |      |        |                  |                |
| rs7650227 | PP     | ULK4      | ULK4         | 4      | LDproxy(CEU-1kg) | 1                       | rs9854833  | Cerebellum (ScanDB)          | 8.69E-16     | 3   | 41750581 |             | ULK4       | cis                         |      |        |                  |                |
| rs7650227 | PP     | ULK4      | ULK4         | 4      | LDproxy(CEU-1kg) | 1                       | rs9874975  | Parietal lobe (ScanDB)       | 1.21E-15     | 3   | 41739304 |             | ULK4       | cis                         |      |        |                  |                |
| rs7650227 | PP     | ULK4      | ULK4         | 4      | LDproxy(CEU-1kg) | 1                       | rs6599175  | Cerebellum (ScanDB)          | 1.31E-15     | 3   | 41761013 |             | ULK4       | cis                         |      |        |                  |                |
| rs7650227 | PP     | ULK4      | ULK4         | 4      | LDproxy(CEU-1kg) | 1                       | rs1052501  | Visual cortex (Huntington's) | 1.39E-15     | 3   | 41900402 | 10025919071 | CTNNB1     | cis                         |      |        |                  |                |
| rs7650227 | PP     | ULK4      | ULK4         | 4      | LDproxy(CEU-1kg) | 1                       | rs9867627  | Cerebellum (ScanDB)          | 1.39E-15     | 3   | 41770845 |             | ULK4       | cis                         |      |        |                  |                |
| rs7650227 | PP     | ULK4      | ULK4         | 4      | LDproxy(CEU-1kg) | 1                       | rs3890604  | Parietal lobe (ScanDB)       | 1.52E-15     | 3   | 41735629 |             | ULK4       | cis                         |      |        |                  |                |
| rs7650227 | PP     | ULK4      | ULK4         | 4      | LDproxy(CEU-1kg) | 1                       | rs9825741  | Parietal lobe (ScanDB)       | 1.52E-15     | 3   | 41736832 |             | ULK4       | cis                         |      |        |                  |                |
| rs7650227 | PP     | ULK4      | ULK4         | 4      | LDproxy(CEU-1kg) | 1                       | rs9852303  | Parietal lobe (ScanDB)       | 1.52E-15     | 3   | 41734529 |             | ULK4       | cis                         |      |        |                  |                |
| rs7650227 | PP     | ULK4      | ULK4         | 4      | LDproxy(CEU-1kg) | 1                       | rs9847006  | Parietal lobe (ScanDB)       | 1.58E-15     | 3   | 41730363 |             | ULK4       | cis                         |      |        |                  |                |
| rs7650227 | PP     | ULK4      | ULK4         | 4      | LDproxy(CEU-1kg) | 1                       | rs1052501  | Cerebellum (ScanDB)          | 2.00E-15     | 3   | 41950394 |             | ULK4       | cis                         |      |        |                  |                |
| rs7650227 | PP     | ULK4      | ULK4         | 4      | LDproxy(CEU-1kg) | 1                       | rs13325965 | Cerebellum (ScanDB)          | 2.00E-15     | 3   | 41889946 |             | ULK4       | cis                         |      |        |                  |                |
| rs7650227 | PP     | ULK4      | ULK4         | 4      | LDproxy(CEU-1kg) | 1                       | rs1716685  | Cerebellum (ScanDB)          | 2.00E-15     | 3   | 41900305 |             | ULK4       | cis                         |      |        |                  |                |
| rs7650227 | PP     | ULK4      | ULK4         | 4      | LDproxy(CEU-1kg) | 1                       | rs1717000  | Cerebellum (ScanDB)          | 2.00E-15     | 3   | 41905223 |             | ULK4       | cis                         |      |        |                  |                |
| rs7650227 | PP     | ULK4      | ULK4         | 4      | LDproxy(CEU-1kg) | 1                       | rs1717006  | Cerebellum (ScanDB)          | 2.00E-15     | 3   | 41915452 |             | ULK4       | cis                         |      |        |                  |                |
| rs7650227 | PP     | ULK4      | ULK4         | 4      | LDproxy(CEU-1kg) | 1                       | rs1717017  | Cerebellum (ScanDB)          | 2.00E-15     | 3   | 41890620 |             | ULK4       | cis                         |      |        |                  |                |
| rs7650227 | PP     | ULK4      | ULK4         | 4      | LDproxy(CEU-1kg) | 1                       | rs2128834  | Cerebellum (ScanDB)          | 2.00E-15     | 3   | 41837649 |             | ULK4       | cis                         |      |        |                  |                |
| rs7650227 | PP     | ULK4      | ULK4         | 4      | LDproxy(CEU-1kg) | 1                       | rs6796210  | Cerebellum (ScanDB)          | 2.00E-15     | 3   | 41826722 |             | ULK4       | cis                         |      |        |                  |                |
| rs7650227 | PP     | ULK4      | ULK4         | 4      | LDproxy(CEU-1kg) | 1                       | rs7648578  | Cerebellum (ScanDB)          | 2.00E-15     | 3   | 41833735 |             | ULK4       | cis                         |      |        |                  |                |
| rs7650227 | PP     | ULK4      | ULK4         | 4      | LDproxy(CEU-1kg) | 1                       | rs9839399  | Cerebellum (ScanDB)          | 2.00E-15     | 3   | 41903048 |             | ULK4       | cis                         |      |        |                  |                |
| rs7650227 | PP     | ULK4      | ULK4         | 4      | LDproxy(CEU-1kg) | 1                       | rs1016669  | Cerebellum (ScanDB)          | 2.01E-15     | 3   | 41869444 |             | ULK4       | cis                         |      |        |                  |                |
| rs7650227 | PP     | ULK4      | ULK4         | 4      | LDproxy(CEU-1kg) | 1                       | rs3774372  | Cerebellum (ScanDB)          | 2.01E-15     | 3   | 41852418 |             | ULK4       | cis                         |      |        |                  |                |
| rs7650227 | PP     | ULK4      | ULK4         | 4      | LDproxy(CEU-1kg) | 1                       | rs6791806  | Cerebellum (ScanDB)          | 2.01E-15     | 3   | 41864999 |             | ULK4       | cis                         |      |        |                  |                |
| rs7650227 | PP     | ULK4      | ULK4         | 4      | LDproxy(CEU-1kg) | 1                       | rs9873207  | Cerebellum (ScanDB)          | 2.01E-15     | 3   | 41859754 |             | ULK4       | cis                         |      |        |                  |                |
| rs7650227 | PP     | ULK4      | ULK4         | 4      | LDproxy(CEU-1kg) | 1                       | rs10212536 | Cerebellum (ScanDB)          | 2.04E-15     | 3   | 41802030 |             | ULK4       | cis                         |      |        |                  |                |
| rs7650227 | PP     | ULK4      | ULK4         | 4      | LDproxy(CEU-1kg) | 1                       | rs6803652  | Cerebellum (ScanDB)          | 2.04E-15     | 3   | 41799560 |             | ULK4       | cis                         |      |        |                  |                |
| rs7650227 | PP     | ULK4      | ULK4         | 4      | LDproxy(CEU-1kg) | 1                       | rs17062109 | Cerebellum (ScanDB)          | 2.05E-15     | 3   | 41785368 |             | ULK4       | cis                         |      |        |                  |                |
| rs7650227 | PP     | ULK4      | ULK4         | 4      | LDproxy(CEU-1kg) | 1                       | rs9874975  | Cerebellum (ScanDB)          | 2.20E-15     | 3   | 41739304 |             | ULK4       | cis                         |      |        |                  |                |
| rs7650227 | PP     | ULK4      | ULK4         | 4      | LDproxy(CEU-1kg) | 1                       | rs9847006  | Cerebellum (ScanDB)          | 2.71E-15     | 3   | 41730363 |             | ULK4       | cis                         |      |        |                  |                |
| rs7650227 | PP     | ULK4      | ULK4         | 4      | LDproxy(CEU-1kg) | 1                       | rs3890604  | Cerebellum (ScanDB)          | 2.78E-15     | 3   | 41735629 |             | ULK4       | cis                         |      |        |                  |                |
| rs7650227 | PP     | ULK4      | ULK4         | 4      | LDproxy(CEU-1kg) | 1                       | rs9852303  | Cerebellum (ScanDB)          | 2.78E-15     | 3   | 41734529 |             | ULK4       | cis                         |      |        |                  |                |
| rs7650227 | PP     | ULK4      | ULK4         | 4      | LDproxy(CEU-1kg) | 1                       | rs9825741  | Cerebellum (ScanDB)          | 2.79E-15     | 3   | 41736832 |             | ULK4       | cis                         |      |        |                  |                |
| rs7650227 | PP     | ULK4      | ULK4         | 4      | LDproxy(CEU-1kg) | 1                       | rs1716642  | Cerebellum (ScanDB)          | 2.97E-15     | 3   | 41940869 |             | ULK4       | cis                         |      |        |                  |                |
| rs7650227 | PP     | ULK4      | ULK4         | 4      | LDproxy(CEU-1kg) | 1                       | rs3934103  | Cerebellum (ScanDB)          | 3.44E-15     | 3   | 41952218 |             | ULK4       | cis                         |      |        |                  |                |
| rs7650227 | PP     | ULK4      | ULK4         | 4      | LDproxy(CEU-1kg) | 1                       | rs1717020  | Cerebellum (ScanDB)          | 5.61E-15     | 3   | 41956494 |             | ULK4       | cis                         |      |        |                  |                |

| IndexSNP  | Traits | InRefGene | RefGenes60kb | Locus# | Index/LD status   | r <sup>2</sup> to index | eSNPid     | Tissue                                   | eSNP P value | Chr | B36pos   | ArrayID          | Transcript | type of eQTL (cis or trans) | Beta | Allele | Probe Chromosome | Probe Position |
|-----------|--------|-----------|--------------|--------|-------------------|-------------------------|------------|------------------------------------------|--------------|-----|----------|------------------|------------|-----------------------------|------|--------|------------------|----------------|
| rs7650227 | PP     | ULK4      | ULK4         | 4      | LDproxy(CEU-1kg)  | 1                       | rs1717024  | Cerebellum (ScanDB)                      | 5.61E-15     | 3   | 41959892 |                  | ULK4       | cis                         |      |        |                  |                |
| rs7650227 | PP     | ULK4      | ULK4         | 4      | LDproxy(CEU-1kg)  | 1                       | rs2272007  | Cerebellum (ScanDB)                      | 5.61E-15     | 3   | 41971140 |                  | ULK4       | cis                         |      |        |                  |                |
| rs7650227 | PP     | ULK4      | ULK4         | 4      | LDproxy(CEU-1kg)  | 1                       | rs9856633  | Cerebellum (ScanDB)                      | 5.61E-15     | 3   | 41988854 |                  | ULK4       | cis                         |      |        |                  |                |
| rs7650227 | PP     | ULK4      | ULK4         | 4      | LDproxy(CEU-1kg)  | 1                       | rs7648578  | PerIPHERAL artery plaque                 | 9.06E-14     | 3   | 41833735 | 100160459_TGI_ε  | ULK4       | cis                         |      |        |                  |                |
| rs7650227 | PP     | ULK4      | ULK4         | 4      | LDproxy(CEU-1kg)  | 1                       | rs6803652  | Lung                                     | 9.75E-14     | 3   | 41799560 | 100149945_TGI_ε  | ULK4       | trans                       |      |        |                  |                |
| rs7650227 | PP     | ULK4      | ULK4         | 4      | LDproxy(CEU-1kg)  | 1                       | rs3934103  | Visual cortex (all samples)              | 4.32E-13     | 3   | 41952218 | 10023809218      | ULK4       | cis                         |      |        |                  |                |
| rs7650227 | PP     | ULK4      | ULK4         | 4      | LDproxy(CEU-1kg)  | 1                       | rs2272007  | Liver (ScanDB)                           | 5.57E-13     | 3   | 41971140 |                  | ULK4       | cis                         |      |        |                  |                |
| rs7650227 | PP     | ULK4      | ULK4         | 4      | LDproxy(CEU-1kg)  | 1                       | rs1052501  | Liver (ScanDB)                           | 6.22E-13     | 3   | 41975390 |                  | ULK4       | cis                         |      |        |                  |                |
| rs7650227 | PP     | ULK4      | ULK4         | 4      | LDproxy(CEU-1kg)  | 1                       | rs9852303  | Liver (ScanDB)                           | 7.34E-13     | 3   | 41734529 |                  | ULK4       | cis                         |      |        |                  |                |
| rs7650227 | PP     | ULK4      | ULK4         | 4      | LDproxy(CEU-1kg)  | 1                       | rs6599175  | Liver (ScanDB)                           | 9.19E-13     | 3   | 41761013 |                  | ULK4       | cis                         |      |        |                  |                |
| rs7650227 | PP     | ULK4      | ULK4         | 4      | LDproxy(CEU-1kg)  | 1                       | rs3934103  | Liver (ScanDB)                           | 9.88E-13     | 3   | 41952218 |                  | ULK4       | cis                         |      |        |                  |                |
| rs7650227 | PP     | ULK4      | ULK4         | 4      | LDproxy(CEU-RelZ) | 1                       | rs1716975  | Liver (ScanDB)                           | 1.47E-12     | 3   | 41935010 |                  | ULK4       | cis                         |      |        |                  |                |
| rs7650227 | PP     | ULK4      | ULK4         | 4      | LDproxy(CEU-1kg)  | 1                       | rs1717017  | Liver (ScanDB)                           | 3.08E-12     | 3   | 41890620 |                  | ULK4       | cis                         |      |        |                  |                |
| rs7650227 | PP     | ULK4      | ULK4         | 4      | LDproxy(CEU-1kg)  | 1                       | rs6796210  | Liver (ScanDB)                           | 3.08E-12     | 3   | 41826722 |                  | ULK4       | cis                         |      |        |                  |                |
| rs7650227 | PP     | ULK4      | ULK4         | 4      | LDproxy(CEU-1kg)  | 1                       | rs9825741  | Peripheral artery plaque                 | 3.91E-12     | 3   | 41736832 | 100149945_TGI_ε  | ULK4       | cis                         |      |        |                  |                |
| rs7650227 | PP     | ULK4      | ULK4         | 4      | LDproxy(CEU-1kg)  | 1                       | rs6599179  | Liver (ScanDB)                           | 4.02E-12     | 3   | 41830288 |                  | ULK4       | cis                         |      |        |                  |                |
| rs7650227 | PP     | ULK4      | ULK4         | 4      | LDproxy(CEU-1kg)  | 1                       | rs1052501  | Liver(Greenawalt)                        | 7.81E-12     | 3   | 41900402 | 10023809218      | ULK4       | cis                         |      |        |                  |                |
| rs7650227 | PP     | ULK4      | ULK4         | 4      | LDproxy(CEU-1kg)  | 1                       | rs1717020  | Hippocampus (CA1, n=61; Kim et al.)      | 1.06E-11     | 3   | 41981490 | 232206_at        | ULK4       | cis                         | 0.00 |        |                  |                |
| rs7650227 | PP     | ULK4      | ULK4         | 4      | LDproxy(CEU-1kg)  | 1                       | rs9874975  | Liver (ScanDB)                           | 1.24E-11     | 3   | 41739304 |                  | ULK4       | cis                         |      |        |                  |                |
| rs7650227 | PP     | ULK4      | ULK4         | 4      | LDproxy(CEU-1kg)  | 1                       | rs6803652  | Liver (ScanDB)                           | 1.25E-11     | 3   | 41799560 |                  | ULK4       | cis                         |      |        |                  |                |
| rs7650227 | PP     | ULK4      | ULK4         | 4      | LDproxy(CEU-1kg)  | 1                       | rs9856633  | ER+ breast tumor cells                   | 1.31E-11     | 3   | 41988854 |                  | ULK4       | cis                         |      |        |                  |                |
| rs7650227 | PP     | ULK4      | ULK4         | 4      | LDproxy(CEU-RelZ) | 1                       | rs1716975  | Normal dendritic cells (before Mycobacte | 1.77E-11     | 3   | 41935010 |                  | ULK4       | cis                         |      |        |                  |                |
| rs7650227 | PP     | ULK4      | ULK4         | 4      | LDproxy(CEU-1kg)  | 1                       | rs3774372  | ER+ breast tumor cells                   | 1.95E-11     | 3   | 41852418 |                  | ULK4       | cis                         |      |        |                  |                |
| rs7650227 | PP     | ULK4      | ULK4         | 4      | LDproxy(CEU-1kg)  | 1                       | rs1716685  | ER+ breast tumor cells                   | 2.66E-11     | 3   | 41900305 |                  | ULK4       | cis                         |      |        |                  |                |
| rs7650227 | PP     | ULK4      | ULK4         | 4      | LDproxy(CEU-1kg)  | 1                       | rs1717006  | ER+ breast tumor cells                   | 2.66E-11     | 3   | 41915452 |                  | ULK4       | cis                         |      |        |                  |                |
| rs7650227 | PP     | ULK4      | ULK4         | 4      | LDproxy(CEU-1kg)  | 1                       | rs1717020  | ER+ breast tumor cells                   | 2.66E-11     | 3   | 41956494 |                  | ULK4       | cis                         |      |        |                  |                |
| rs7650227 | PP     | ULK4      | ULK4         | 4      | LDproxy(CEU-1kg)  | 1                       | rs2272007  | ER+ breast tumor cells                   | 2.66E-11     | 3   | 41971140 |                  | ULK4       | cis                         |      |        |                  |                |
| rs7650227 | PP     | ULK4      | ULK4         | 4      | LDproxy(CEU-1kg)  | 1                       | rs7648578  | ER+ breast tumor cells                   | 2.66E-11     | 3   | 41833735 |                  | ULK4       | cis                         |      |        |                  |                |
| rs7650227 | PP     | ULK4      | ULK4         | 4      | LDproxy(CEU-1kg)  | 1                       | rs1717024  | ER+ breast tumor cells                   | 2.87E-11     | 3   | 41959892 |                  | ULK4       | cis                         |      |        |                  |                |
| rs7650227 | PP     | ULK4      | ULK4         | 4      | LDproxy(CEU-1kg)  | 1                       | rs6796210  | RNAseq(HapMapLCL)+DeepSage(blood)        | 4.77E-11     | 3   | 41851718 | ENST0000030183   | ULK4       | cis                         |      |        |                  |                |
| rs7650227 | PP     | ULK4      | ULK4         | 4      | LDproxy(CEU-1kg)  | 1                       | rs13325965 | ER+ breast tumor cells                   | 5.17E-11     | 3   | 41889946 |                  | ULK4       | cis                         |      |        |                  |                |
| rs7650227 | PP     | ULK4      | ULK4         | 4      | LDproxy(CEU-1kg)  | 1                       | rs9856088  | Liver (ScanDB)                           | 5.62E-11     | 3   | 41835486 |                  | ULK4       | cis                         |      |        |                  |                |
| rs7650227 | PP     | ULK4      | ULK4         | 4      | LDproxy(CEU-1kg)  | 1                       | rs1717020  | BcellsTransformed_HapMapCEU              | 5.99E-11     | 3   | 41956494 | 2670619 in 26704 | ULK4       | cis                         |      |        |                  |                |
| rs7650227 | PP     | ULK4      | ULK4         | 4      | LDproxy(CEU-1kg)  | 1                       | rs2128834  | ER+ breast tumor cells                   | 9.91E-11     | 3   | 41837649 |                  | ULK4       | cis                         |      |        |                  |                |
| rs7650227 | PP     | ULK4      | ULK4         | 4      | LDproxy(CEU-1kg)  | 1                       | rs10212536 | Liver (ScanDB)                           | 1.02E-10     | 3   | 41802030 |                  | ULK4       | cis                         |      |        |                  |                |
| rs7650227 | PP     | ULK4      | ULK4         | 4      | LDproxy(CEU-1kg)  | 1                       | rs17062109 | ER+ breast tumor cells                   | 1.09E-10     | 3   | 41785368 |                  | ULK4       | cis                         |      |        |                  |                |
| rs7650227 | PP     | ULK4      | ULK4         | 4      | LDproxy(CEU-1kg)  | 1                       | rs9867627  | ER+ breast tumor cells                   | 1.15E-10     | 3   | 41770845 |                  | ULK4       | cis                         |      |        |                  |                |
| rs7650227 | PP     | ULK4      | ULK4         | 4      | LDproxy(CEU-1kg)  | 1                       | rs1717000  | Liver (ScanDB)                           | 3.48E-10     | 3   | 41905223 |                  | ULK4       | cis                         |      |        |                  |                |
| rs7650227 | PP     | ULK4      | ULK4         | 4      | LDproxy(CEU-1kg)  | 1                       | rs9842261  | ER+ breast tumor cells                   | 3.95E-10     | 3   | 41797712 |                  | ULK4       | cis                         |      |        |                  |                |
| rs7650227 | PP     | ULK4      | ULK4         | 4      | LDproxy(CEU-1kg)  | 1                       | rs6599175  | ER+ breast tumor cells                   | 7.44E-10     | 3   | 41761013 |                  | ULK4       | cis                         |      |        |                  |                |
| rs7650227 | PP     | ULK4      | ULK4         | 4      | LDproxy(CEU-1kg)  | 1                       | rs6599176  | ER+ breast tumor cells                   | 7.44E-10     | 3   | 41763496 |                  | ULK4       | cis                         |      |        |                  |                |
| rs7650227 | PP     | ULK4      | ULK4         | 4      | LDproxy(CEU-1kg)  | 1                       | rs9825741  | ER+ breast tumor cells                   | 7.44E-10     | 3   | 41736832 |                  | ULK4       | cis                         |      |        |                  |                |
| rs7650227 | PP     | ULK4      | ULK4         | 4      | LDproxy(CEU-1kg)  | 1                       | rs9867627  | Liver (ScanDB)                           | 9.63E-10     | 3   | 41770845 |                  | ULK4       | cis                         |      |        |                  |                |
| rs7650227 | PP     | ULK4      | ULK4         | 4      | LDproxy(CEU-1kg)  | 1                       | rs9873207  | Liver (ScanDB)                           | 6.65E-09     | 3   | 41859754 |                  | ULK4       | cis                         |      |        |                  |                |
| rs7650227 | PP     | ULK4      | ULK4         | 4      | LDproxy(CEU-1kg)  | 1                       | rs10212536 | Prefrontal cortex (Alzheimer's)          | 7.60E-09     | 3   | 41802030 | 10023809218      | ULK4       | cis                         |      |        |                  |                |
| rs7650227 | PP     | ULK4      | ULK4         | 4      | LDproxy(CEU-1kg)  | 1                       | rs2272007  | LCL                                      | 2.70E-08     | 3   | 41971140 | 231149_s_at      | ULK4       | cis                         |      |        |                  |                |
| rs7650227 | PP     | ULK4      | ULK4         | 4      | LDproxy(CEU-1kg)  | 1                       | rs1052501  | LCL                                      | 3.90E-08     | 3   | 41900402 | 231149_s_at      | ULK4       | cis                         |      |        |                  |                |
| rs7650227 | PP     | ULK4      | ULK4         | 4      | LDproxy(CEU-1kg)  | 1                       | rs1994157  | Liver (ScanDB)                           | 4.07E-08     | 3   | 41872486 |                  | ULK4       | cis                         |      |        |                  |                |
| rs7650227 | PP     | ULK4      | ULK4         | 4      | LDproxy(CEU-RelZ) | 1                       | rs1716975  | LCL                                      | 7.90E-08     | 3   | 41935010 | 231149_s_at      | ULK4       | cis                         |      |        |                  |                |
| rs7650227 | PP     | ULK4      | ULK4         | 4      | LDproxy(CEU-1kg)  | 1                       | rs10212536 | Cerebellum (Huntington's)                | 9.93E-07     | 3   | 41802030 | 10025919071      | CTNNB1     | cis                         |      |        |                  |                |
| rs7650227 | PP     | ULK4      | ULK4         | 4      | LDproxy(CEU-1kg)  | 1                       | rs9852303  | Cerebellum (normal samples)              | 1.1088E-05   | 3   | 41734529 | 10025919071      | CTNNB1     | cis                         |      |        |                  |                |
| rs7650227 | PP     | ULK4      | ULK4         | 4      | LDproxy(CEU-1kg)  | 1                       | rs1125203  | Intestine (normal ileum)                 | 2.98E-05     | 3   | 41760895 |                  | ULK4       | cis                         |      |        |                  |                |
| rs7650227 | PP     | ULK4      | ULK4         | 4      | LDproxy(CEU-1kg)  | 1                       | rs6599175  | Intestine (normal ileum)                 | 2.98E-05     | 3   | 41786009 |                  | ULK4       | cis                         |      |        |                  |                |
| rs7650227 | PP     | ULK4      | ULK4         | 4      | LDproxy(CEU-1kg)  | 1                       | rs9874975  | Intestine (normal ileum)                 | 2.98E-05     | 3   | 41764300 |                  | ULK4       | cis                         |      |        |                  |                |
| rs7650227 | PP     | ULK4      | ULK4         | 4      | LDproxy(CEU-1kg)  | 1                       | rs7632387  | Intestine (normal ileum)                 | 3.61E-05     | 3   | 41853161 |                  | ULK4       | cis                         |      |        |                  |                |
| rs7650227 | PP     | ULK4      | ULK4         | 4      | LDproxy(CEU-1kg)  | 1                       | rs1052501  | Prefrontal cortex (Huntington's)         | 3.85E-05     | 3   | 41900402 | 10023809218      | ULK4       | cis                         |      |        |                  |                |
| rs7650227 | PP     | ULK4      | ULK4         | 4      | LDproxy(CEU-1kg)  | 1                       | rs1052501  | Intestine (normal ileum)                 | 4.60E-05     | 3   | 41925398 |                  | ULK4       | cis                         |      |        |                  |                |
| rs7650227 | PP     | ULK4      | ULK4         | 4      | LDproxy(CEU-1kg)  | 1                       | rs1717000  | Intestine (normal ileum)                 | 4.60E-05     | 3   | 41930219 |                  | ULK4       | cis                         |      |        |                  |                |
| rs7650227 | PP     | ULK4      | ULK4         | 4      | LDproxy(CEU-1kg)  | 1                       | rs6599179  | Intestine (normal ileum)                 | 4.60E-05     | 3   | 41855284 |                  | ULK4       | cis                         |      |        |                  |                |

| IndexSNP  | Traits | InRefGene | RefGenes60kb | Locus# | Index/LD status   | r <sup>2</sup> to index | eSNPid     | Tissue                             | eSNP P value     | Chr | B36pos   | ArrayID         | Transcript    | type of eQTL (cis or trans) | Beta | Allele | Probe Chromosome | Probe Position |
|-----------|--------|-----------|--------------|--------|-------------------|-------------------------|------------|------------------------------------|------------------|-----|----------|-----------------|---------------|-----------------------------|------|--------|------------------|----------------|
| rs7650227 | PP     | ULK4      | ULK4         | 4      | LDproxy(CEU-1kg)  | 1                       | rs6796210  | Intestine (normal ileum)           | 4.60E-05         | 3   | 41851718 |                 | ULK4          | cis                         |      |        |                  |                |
| rs7650227 | PP     | ULK4      | ULK4         | 4      | LDproxy(CEU-1kg)  | 1                       | rs9857175  | Intestine (normal ileum)           | 4.60E-05         | 3   | 41822054 |                 | ULK4          | cis                         |      |        |                  |                |
| rs7650227 | PP     | ULK4      | ULK4         | 4      | LDproxy(CEU-1kg)  | 1                       | rs1994157  | Intestine (normal ileum)           | 5.68E-05         | 3   | 41897482 |                 | ULK4          | cis                         |      |        |                  |                |
| rs7650227 | PP     | ULK4      | ULK4         | 4      | LDproxy(CEU-1kg)  | 1                       | rs9852303  | Visual cortex (all samples)        | 5.95E-05         | 3   | 41734529 | 10023829862     | ULK4          | cis                         |      |        |                  | AK022066       |
| rs7650227 | PP     | ULK4      | ULK4         | 4      | LDproxy(CEU-1kg)  | 1                       | rs1615243  | Intestine (normal ileum)           | 6.89E-05         | 3   | 41965234 |                 | ULK4          | cis                         |      |        |                  |                |
| rs7650227 | PP     | ULK4      | ULK4         | 4      | LDproxy(CEU-1kg)  | 1                       | rs1716984  | Intestine (normal ileum)           | 6.89E-05         | 3   | 41965532 |                 | ULK4          | cis                         |      |        |                  |                |
| rs7650227 | PP     | ULK4      | ULK4         | 4      | LDproxy(CEU-1kg)  | 1                       | rs2272007  | Intestine (normal ileum)           | 6.89E-05         | 3   | 41996136 |                 | ULK4          | cis                         |      |        |                  |                |
| rs7650227 | PP     | ULK4      | ULK4         | 4      | LDproxy(CEU-1kg)  | 1                       | rs2128835  | Intestine (normal ileum)           | 7.22E-05         | 3   | 41862873 |                 | ULK4          | cis                         |      |        |                  |                |
| rs7650227 | PP     | ULK4      | ULK4         | 4      | LDproxy(CEU-Rel2) | 1                       | rs1716975  | Prefrontal cortex (normal samples) | 1.83E-03         | 3   | 41935010 | 10023809218     | ULK4          | cis                         |      |        |                  |                |
| rs7650227 | PP     | ULK4      | ULK4         | 4      | LDproxy(CEU-1kg)  | 1                       | rs9847006  | Lung                               | <2E-16           | 3   | 41730363 | 100125684_TGI_ε | ULK4          | cis                         |      |        |                  | Unknown        |
| rs7650227 | PP     | ULK4      | ULK4         | 4      | LDproxy(CEU-1kg)  | 1                       | rs10212536 | omental                            | 6.93E-17;4.7E-17 | 3   | 41802030 | 10023809218;100 | ULK4;AK022066 | cis                         |      |        |                  |                |
| rs7650227 | PP     | ULK4      | ULK4         | 4      | LDproxy(CEU-Rel2) | 0.953                   | rs6599167  | Visual cortex (Alzheimer's)        | 3.11E-08         | 3   | 41725264 | 10023809218     | ULK4          | cis                         |      |        |                  |                |
| rs7650227 | PP     | ULK4      | ULK4         | 4      | LDproxy(CEU-Rel2) | 0.861                   | rs10510731 | Lung                               | 1.40E-14         | 3   | 41828314 | 100160459_TGI_ε | ULK4          | cis                         |      |        |                  |                |
| rs7650227 | PP     | ULK4      | ULK4         | 4      | LDproxy(CEU-Rel2) | 0.861                   | rs4299460  | Lung                               | 1.47E-14         | 3   | 41927449 | 100311290_TGI_ε | ULK4          | cis                         |      |        |                  |                |
| rs7650227 | PP     | ULK4      | ULK4         | 4      | LDproxy(CEU-Rel2) | 0.861                   | rs17214945 | ER+ breast tumor cells             | 2.69E-11         | 3   | 41783664 |                 | ULK4          | cis                         |      |        |                  |                |
| rs7650227 | PP     | ULK4      | ULK4         | 4      | LDproxy(CEU-Rel2) | 0.861                   | rs17214987 | ER+ breast tumor cells             | 2.69E-11         | 3   | 41785485 |                 | ULK4          | cis                         |      |        |                  |                |
| rs7650227 | PP     | ULK4      | ULK4         | 4      | LDproxy(CEU-Rel2) | 0.861                   | rs17218264 | ER+ breast tumor cells             | 2.69E-11         | 3   | 41950851 |                 | ULK4          | cis                         |      |        |                  |                |
| rs7650227 | PP     | ULK4      | ULK4         | 4      | LDproxy(CEU-Rel2) | 0.861                   | rs17283929 | ER+ breast tumor cells             | 2.69E-11         | 3   | 41916902 |                 | ULK4          | cis                         |      |        |                  |                |
| rs7650227 | PP     | ULK4      | ULK4         | 4      | LDproxy(CEU-Rel2) | 0.861                   | rs17218103 | Liver (ScanDB)                     | 5.14E-11         | 3   | 41918728 |                 | ULK4          | cis                         |      |        |                  |                |
| rs7650227 | PP     | ULK4      | ULK4         | 4      | LDproxy(CEU-Rel2) | 0.861                   | rs17218264 | Parietal lobe (ScanDB)             | 7.13E-11         | 3   | 41950851 |                 | ULK4          | cis                         |      |        |                  |                |
| rs7650227 | PP     | ULK4      | ULK4         | 4      | LDproxy(CEU-Rel2) | 0.861                   | rs17215183 | Parietal lobe (ScanDB)             | 1.21E-10         | 3   | 41787338 |                 | ULK4          | cis                         |      |        |                  |                |
| rs7650227 | PP     | ULK4      | ULK4         | 4      | LDproxy(CEU-Rel2) | 0.861                   | rs17214945 | Parietal lobe (ScanDB)             | 1.24E-10         | 3   | 41783664 |                 | ULK4          | cis                         |      |        |                  |                |
| rs7650227 | PP     | ULK4      | ULK4         | 4      | LDproxy(CEU-Rel2) | 0.861                   | rs17215589 | Parietal lobe (ScanDB)             | 1.27E-10         | 3   | 41806207 |                 | ULK4          | cis                         |      |        |                  |                |
| rs7650227 | PP     | ULK4      | ULK4         | 4      | LDproxy(CEU-Rel2) | 0.861                   | rs17218103 | Parietal lobe (ScanDB)             | 1.36E-10         | 3   | 41918728 |                 | ULK4          | cis                         |      |        |                  |                |
| rs7650227 | PP     | ULK4      | ULK4         | 4      | LDproxy(CEU-Rel2) | 0.861                   | rs17214945 | Cerebellum (ScanDB)                | 3.47E-10         | 3   | 41783664 |                 | ULK4          | cis                         |      |        |                  |                |
| rs7650227 | PP     | ULK4      | ULK4         | 4      | LDproxy(CEU-Rel2) | 0.861                   | rs17283677 | ER+ breast tumor cells             | 3.55E-10         | 3   | 41901152 |                 | ULK4          | cis                         |      |        |                  |                |
| rs7650227 | PP     | ULK4      | ULK4         | 4      | LDproxy(CEU-Rel2) | 0.861                   | rs17215183 | Cerebellum (ScanDB)                | 4.01E-10         | 3   | 41787338 |                 | ULK4          | cis                         |      |        |                  |                |
| rs7650227 | PP     | ULK4      | ULK4         | 4      | LDproxy(CEU-Rel2) | 0.861                   | rs17215589 | Cerebellum (ScanDB)                | 4.05E-10         | 3   | 41806207 |                 | ULK4          | cis                         |      |        |                  |                |
| rs7650227 | PP     | ULK4      | ULK4         | 4      | LDproxy(CEU-Rel2) | 0.861                   | rs17218103 | Cerebellum (ScanDB)                | 4.20E-10         | 3   | 41918728 |                 | ULK4          | cis                         |      |        |                  |                |
| rs7650227 | PP     | ULK4      | ULK4         | 4      | LDproxy(CEU-Rel2) | 0.861                   | rs17218264 | Cerebellum (ScanDB)                | 4.54E-10         | 3   | 41950851 |                 | ULK4          | cis                         |      |        |                  |                |
| rs7650227 | PP     | ULK4      | ULK4         | 4      | LDproxy(CEU-Rel2) | 0.861                   | rs10510731 | Liver (ScanDB)                     | 4.74E-10         | 3   | 41828314 |                 | ULK4          | cis                         |      |        |                  |                |
| rs7650227 | PP     | ULK4      | ULK4         | 4      | LDproxy(CEU-1kg)  | 0.857                   | rs794894   | Parietal lobe (ScanDB)             | 1.63E-16         | 3   | 42007487 |                 | ULK4          | cis                         |      |        |                  |                |
| rs7650227 | PP     | ULK4      | ULK4         | 4      | LDproxy(CEU-1kg)  | 0.857                   | rs7634985  | Parietal lobe (ScanDB)             | 1.73E-16         | 3   | 41994569 |                 | ULK4          | cis                         |      |        |                  |                |
| rs7650227 | PP     | ULK4      | ULK4         | 4      | LDproxy(CEU-1kg)  | 0.857                   | rs13087502 | Parietal lobe (ScanDB)             | 1.78E-16         | 3   | 41990114 |                 | ULK4          | cis                         |      |        |                  |                |
| rs7650227 | PP     | ULK4      | ULK4         | 4      | LDproxy(CEU-1kg)  | 0.857                   | rs794894   | Cerebellum (ScanDB)                | 1.45E-13         | 3   | 42007487 |                 | ULK4          | cis                         |      |        |                  |                |
| rs7650227 | PP     | ULK4      | ULK4         | 4      | LDproxy(CEU-1kg)  | 0.857                   | rs7634985  | Cerebellum (ScanDB)                | 1.56E-13         | 3   | 41994569 |                 | ULK4          | cis                         |      |        |                  |                |
| rs7650227 | PP     | ULK4      | ULK4         | 4      | LDproxy(CEU-1kg)  | 0.857                   | rs13087502 | Cerebellum (ScanDB)                | 1.61E-13         | 3   | 41990114 |                 | ULK4          | cis                         |      |        |                  |                |
| rs7650227 | PP     | ULK4      | ULK4         | 4      | LDproxy(CEU-1kg)  | 0.857                   | rs13087502 | ER+ breast tumor cells             | 1.55E-10         | 3   | 41990114 |                 | ULK4          | cis                         |      |        |                  |                |
| rs7650227 | PP     | ULK4      | ULK4         | 4      | LDproxy(CEU-1kg)  | 0.812                   | rs809930   | Parietal lobe (ScanDB)             | 5.10E-15         | 3   | 42040009 |                 | ULK4          | cis                         |      |        |                  |                |
| rs7650227 | PP     | ULK4      | ULK4         | 4      | LDproxy(CEU-1kg)  | 0.812                   | rs7652506  | Parietal lobe (ScanDB)             | 6.85E-15         | 3   | 42035239 |                 | ULK4          | cis                         |      |        |                  |                |
| rs7650227 | PP     | ULK4      | ULK4         | 4      | LDproxy(CEU-1kg)  | 0.812                   | rs939561   | Parietal lobe (ScanDB)             | 7.69E-15         | 3   | 42032105 |                 | ULK4          | cis                         |      |        |                  |                |
| rs7650227 | PP     | ULK4      | ULK4         | 4      | LDproxy(CEU-1kg)  | 0.812                   | rs7629767  | Parietal lobe (ScanDB)             | 7.83E-15         | 3   | 42018513 |                 | ULK4          | cis                         |      |        |                  |                |
| rs7650227 | PP     | ULK4      | ULK4         | 4      | LDproxy(CEU-1kg)  | 0.812                   | rs10510732 | SubCutAdipose(Greenawalt)          | 1.06E-14         | 3   | 41982343 | 10023809218     | ULK4          | cis                         |      |        |                  |                |
| rs7650227 | PP     | ULK4      | ULK4         | 4      | LDproxy(CEU-1kg)  | 0.812                   | rs939561   | Cerebellum (ScanDB)                | 5.72E-12         | 3   | 42032105 |                 | ULK4          | cis                         |      |        |                  |                |
| rs7650227 | PP     | ULK4      | ULK4         | 4      | LDproxy(CEU-1kg)  | 0.812                   | rs7629767  | Cerebellum (ScanDB)                | 6.08E-12         | 3   | 42018513 |                 | ULK4          | cis                         |      |        |                  |                |
| rs7650227 | PP     | ULK4      | ULK4         | 4      | LDproxy(CEU-1kg)  | 0.812                   | rs809930   | Cerebellum (ScanDB)                | 6.19E-12         | 3   | 42040009 |                 | ULK4          | cis                         |      |        |                  |                |
| rs7650227 | PP     | ULK4      | ULK4         | 4      | LDproxy(CEU-1kg)  | 0.812                   | rs7652506  | Cerebellum (ScanDB)                | 7.19E-12         | 3   | 42035239 |                 | ULK4          | cis                         |      |        |                  |                |
| rs7650227 | PP     | ULK4      | ULK4         | 4      | LDproxy(CEU-1kg)  | 0.812                   | rs7652506  | ER+ breast tumor cells             | 1.07E-11         | 3   | 42035239 |                 | ULK4          | cis                         |      |        |                  |                |
| rs7650227 | PP     | ULK4      | ULK4         | 4      | LDproxy(CEU-1kg)  | 0.812                   | rs10510732 | ER+ breast tumor cells             | 2.69E-11         | 3   | 41982343 |                 | ULK4          | cis                         |      |        |                  |                |
| rs7650227 | PP     | ULK4      | ULK4         | 4      | LDproxy(CEU-1kg)  | 0.812                   | rs17284313 | ER+ breast tumor cells             | 2.69E-11         | 3   | 41961791 |                 | ULK4          | cis                         |      |        |                  |                |
| rs7650227 | PP     | ULK4      | ULK4         | 4      | LDproxy(CEU-1kg)  | 0.812                   | rs17284472 | ER+ breast tumor cells             | 2.69E-11         | 3   | 41971308 |                 | ULK4          | cis                         |      |        |                  |                |
| rs7650227 | PP     | ULK4      | ULK4         | 4      | LDproxy(CEU-1kg)  | 0.812                   | rs17284313 | Parietal lobe (ScanDB)             | 7.62E-11         | 3   | 41961791 |                 | ULK4          | cis                         |      |        |                  |                |
| rs7650227 | PP     | ULK4      | ULK4         | 4      | LDproxy(CEU-1kg)  | 0.812                   | rs10510732 | Parietal lobe (ScanDB)             | 7.64E-11         | 3   | 41982343 |                 | ULK4          | cis                         |      |        |                  |                |
| rs7650227 | PP     | ULK4      | ULK4         | 4      | LDproxy(CEU-1kg)  | 0.812                   | rs17284472 | Parietal lobe (ScanDB)             | 7.64E-11         | 3   | 41971308 |                 | ULK4          | cis                         |      |        |                  |                |
| rs7650227 | PP     | ULK4      | ULK4         | 4      | LDproxy(CEU-1kg)  | 0.812                   | rs809930   | ER+ breast tumor cells             | 9.77E-11         | 3   | 42040009 |                 | ULK4          | cis                         |      |        |                  |                |
| rs7650227 | PP     | ULK4      | ULK4         | 4      | LDproxy(CEU-1kg)  | 0.812                   | rs10510732 | Liver (ScanDB)                     | 1.11E-10         | 3   | 41982343 |                 | ULK4          | cis                         |      |        |                  |                |
| rs7650227 | PP     | ULK4      | ULK4         | 4      | LDproxy(CEU-1kg)  | 0.812                   | rs17284313 | Cerebellum (ScanDB)                | 4.41E-10         | 3   | 41961791 |                 | ULK4          | cis                         |      |        |                  |                |
| rs7650227 | PP     | ULK4      | ULK4         | 4      | LDproxy(CEU-1kg)  | 0.812                   | rs10510732 | Cerebellum (ScanDB)                | 4.42E-10         | 3   | 41982343 |                 | ULK4          | cis                         |      |        |                  |                |
| rs7650227 | PP     | ULK4      | ULK4         | 4      | LDproxy(CEU-1kg)  | 0.812                   | rs17284472 | Cerebellum (ScanDB)                | 4.42E-10         | 3   | 41971308 |                 | ULK4          | cis                         |      |        |                  |                |



| IndexSNP   | Traits | InRefGene | RefGenes60kb                                | Locus# | Index/LD status   | r <sup>2</sup> to index | eSNPid     | Tissue                                  | eSNP P value  | Chr | B36pos   | ArrayID         | Transcript         | type of eQTL (cis or trans) | Beta  | Allele | Probe Chromosome | Probe Position |
|------------|--------|-----------|---------------------------------------------|--------|-------------------|-------------------------|------------|-----------------------------------------|---------------|-----|----------|-----------------|--------------------|-----------------------------|-------|--------|------------------|----------------|
| rs7650227  | PP     | ULK4      | ULK4                                        | 4      | LDproxy(CEU-1kg)  | 0.812                   | rs10510732 | Stomach                                 | 8.32E-10      | 3   | 41982343 | 100311290       | ULK4               | cis                         |       |        |                  |                |
| rs7650227  | PP     | ULK4      | ULK4                                        | 4      | LDproxy(CEU-1kg)  | 0.812                   | rs10510732 | Cerebellum (Alzheimer's)                | 5.26E-02      | 3   | 41982343 | 10023829862     | AK022066           | cis                         |       |        |                  |                |
| rs7650227  | PP     | ULK4      | ULK4                                        | 4      | LDproxy(CEU-1kg)  | 0.762                   | rs794899   | LCL                                     | 1.30E-07      | 3   | 42003726 | 231149_s_at     | ULK4               | cis                         |       |        |                  |                |
| rs7650227  | PP     | ULK4      | ULK4                                        | 4      | LDproxy(CEU-1kg)  | 0.761                   | rs12635286 | Parietal lobe (ScanDB)                  | 7.75E-15      | 3   | 42026840 |                 | ULK4               | cis                         |       |        |                  |                |
| rs7650227  | PP     | ULK4      | ULK4                                        | 4      | LDproxy(CEU-1kg)  | 0.761                   | rs12635286 | Cerebellum (ScanDB)                     | 6.72E-12      | 3   | 42026840 |                 | ULK4               | cis                         |       |        |                  |                |
| rs7650227  | PP     | ULK4      | ULK4                                        | 4      | LDproxy(CEU-1kg)  | 0.761                   | rs12635286 | Liver (ScanDB)                          | 1.85E-08      | 3   | 42026840 |                 | ULK4               | cis                         |       |        |                  |                |
| rs7650227  | PP     | ULK4      | ULK4                                        | 4      | LDproxy(CEU-1kg)  | 0.761                   | rs12635286 | Liver (Greenawalt)                      | 1.76E-07      | 3   | 42026840 | 10025919071     | CTNNB1             | cis                         |       |        |                  |                |
| rs7650227  | PP     | ULK4      | ULK4                                        | 4      | LDproxy(CEU-1kg)  | 0.761                   | rs12635286 | Cerebellum (Alzheimer's)                | 2.92E-05      | 3   | 42026840 | 10025919071     | CTNNB1             | cis                         |       |        |                  |                |
| rs7733331  | SBP    | NA        | NPR3                                        | 5      | LDproxy(CEU-Rel2) | 0.967                   | rs12656497 | Lung                                    | 1.67E-07      | 5   | 32867696 | 100142475_TG1_ε | NPR3               | cis                         |       |        |                  |                |
| rs7733331  | SBP    | NA        | NPR3                                        | 5      | LDproxy(CEU-Rel2) | 0.84                    | rs1173766  | Lung                                    | 7.02E-08      | 5   | 32840285 | 100303568_TG1_ε | NPR3               | cis                         |       |        |                  |                |
| rs7733331  | SBP    | NA        | NPR3                                        | 5      | LDproxy(CEU-H3)   | 0.784                   | rs1173756  | Lung                                    | 1.91E-08      | 5   | 32825609 | 100145622_TG1_ε | NPR3               | cis                         |       |        |                  |                |
| rs7733331  | SBP    | NA        | NPR3                                        | 5      | LDproxy(CEU-1kg)  | 0.781                   | rs1173743  | Primary PHA-stimulated T cells (GenCord | 5.68E-07      | 5   | 32775047 |                 | ENSG00000056097.1c | cis                         | 0.36  |        |                  |                |
| rs198823   | DBP    | NA        | HIST1H1E;HIST1H1T;HIST1H2BD;HIST1H2BC;HFE;H | 6      | IndexSNP          |                         | rs198823   | Cerebellum                              | 5.54E-21      | 6   | 26230912 | ILMN_2075334    | HIST1H4C           | cis                         |       |        |                  |                |
| rs198823   | DBP    | NA        | HIST1H1E;HIST1H1T;HIST1H2BD;HIST1H2BC;HFE;H | 6      | IndexSNP          |                         | rs198823   | Whole blood (CHARGE)                    | 1.30E-15      | 6   | 26230912 | 2970019         | HIST1H4H           | cis                         | -7.99 | G      | 6                | 26393396       |
| rs198823   | DBP    | NA        | HIST1H1E;HIST1H1T;HIST1H2BD;HIST1H2BC;HFE;H | 6      | IndexSNP          |                         | rs198823   | Temporal cortex                         | 2.59E-13      | 6   | 26230912 | ILMN_2075334    | HIST1H4C           | cis                         |       |        |                  |                |
| rs198823   | DBP    | NA        | HIST1H1E;HIST1H1T;HIST1H2BD;HIST1H2BC;HFE;H | 6      | IndexSNP          |                         | rs198823   | Liver(UChicago)                         | 0.02226068    | 6   | 26230912 | A_23_P395374    | HIST1H4D           | cis                         |       |        |                  |                |
| rs10948071 | PP     | NA        | TTBK1;CRIP3;SLC22A7;ZNF318                  | 7      | IndexSNP          |                         | rs10948071 | Whole blood (CHARGE)                    | 6.44E-09      | 6   | 43388691 | 7050040         | ZNF318             | cis                         | -5.81 | C      | 6                | 43412137       |
| rs10948071 | PP     | NA        | TTBK1;CRIP3;SLC22A7;ZNF318                  | 7      | IndexSNP          |                         | rs10948071 | LCL (MuTHER)                            | 1.82E-06      | 6   | 43388691 | ILMN_1694711    | MAD2L1BP           | cis                         |       |        |                  |                |
| rs10948071 | PP     | NA        | TTBK1;CRIP3;SLC22A7;ZNF318                  | 7      | IndexSNP          |                         | rs10948071 | Skin (MuTHER)                           | 2.56E-05      | 6   | 43388691 | ILMN_1694711    | MAD2L1BP           | cis                         |       |        |                  |                |
| rs10948071 | PP     | NA        | TTBK1;CRIP3;SLC22A7;ZNF318                  | 7      | LDproxy(CEU-1kg)  | 1                       | rs2242416  | Whole blood (Battle)                    | 4.88E-53      | 6   | 43273604 |                 | CRIP3              | cis                         |       |        |                  |                |
| rs10948071 | PP     | NA        | TTBK1;CRIP3;SLC22A7;ZNF318                  | 7      | LDproxy(CEU-1kg)  | 1                       | rs1574430  | Whole blood (CHARGE)                    | 2.71E-16      | 6   | 43377007 | 50193           | ZNF318             | cis                         | -8.19 | A      | 6                | 43411954       |
| rs10948071 | PP     | NA        | TTBK1;CRIP3;SLC22A7;ZNF318                  | 7      | LDproxy(CEU-1kg)  | 1                       | rs2242416  | Whole blood (CHARGE)                    | 2.83E-16      | 6   | 43381582 | 50193           | ZNF318             | cis                         | -8.18 | A      | 6                | 43411954       |
| rs10948071 | PP     | NA        | TTBK1;CRIP3;SLC22A7;ZNF318                  | 7      | LDproxy(CEU-1kg)  | 1                       | rs2469     | Whole blood (CHARGE)                    | 4.13E-16      | 6   | 43407301 | 50193           | ZNF318             | cis                         | -8.13 | C      | 6                | 43411954       |
| rs10948071 | PP     | NA        | TTBK1;CRIP3;SLC22A7;ZNF318                  | 7      | LDproxy(CEU-1kg)  | 1                       | rs1574430  | Intestine (normal ileum)                | 5.70E-14      | 6   | 43269029 |                 | CRIP3              | cis                         |       |        |                  |                |
| rs10948071 | PP     | NA        | TTBK1;CRIP3;SLC22A7;ZNF318                  | 7      | LDproxy(CEU-1kg)  | 1                       | rs2841648  | Intestine (normal ileum)                | 5.70E-14      | 6   | 43269179 |                 | CRIP3              | cis                         |       |        |                  |                |
| rs10948071 | PP     | NA        | TTBK1;CRIP3;SLC22A7;ZNF318                  | 7      | LDproxy(CEU-1kg)  | 1                       | rs2242416  | Intestine (normal ileum)                | 1.37E-13      | 6   | 43273604 |                 | CRIP3              | cis                         |       |        |                  |                |
| rs10948071 | PP     | NA        | TTBK1;CRIP3;SLC22A7;ZNF318                  | 7      | LDproxy(CEU-1kg)  | 1                       | rs2242416  | Blood(Fehrmann et al)                   | 5.90E-06      | 6   | 43381582 | 50193           | ZNF318             | cis                         |       |        |                  |                |
| rs10948071 | PP     | NA        | TTBK1;CRIP3;SLC22A7;ZNF318                  | 7      | LDproxy(CEU-1kg)  | 1                       | rs2469     | Blood(Fehrmann et al)                   | 5.90E-06      | 6   | 43407301 | 50193           | ZNF318             | cis                         |       |        |                  |                |
| rs10948071 | PP     | NA        | TTBK1;CRIP3;SLC22A7;ZNF318                  | 7      | LDproxy(CEU-1kg)  | 1                       | rs2469     | Skin (MuTHER)                           | 1.11E-05      | 6   | 43407301 | ILMN_1694711    | MAD2L1BP           | cis                         |       |        |                  |                |
| rs10948071 | PP     | NA        | TTBK1;CRIP3;SLC22A7;ZNF318                  | 7      | LDproxy(CEU-1kg)  | 1                       | rs2841648  | Skin (MuTHER)                           | 1.46E-05      | 6   | 43377157 | ILMN_1694711    | MAD2L1BP           | cis                         |       |        |                  |                |
| rs10948071 | PP     | NA        | TTBK1;CRIP3;SLC22A7;ZNF318                  | 7      | LDproxy(CEU-1kg)  | 1                       | rs1574430  | Skin (MuTHER)                           | 1.46E-05      | 6   | 43377007 | ILMN_1694711    | MAD2L1BP           | cis                         |       |        |                  |                |
| rs10948071 | PP     | NA        | TTBK1;CRIP3;SLC22A7;ZNF318                  | 7      | LDproxy(CEU-1kg)  | 1                       | rs2242416  | Skin (MuTHER)                           | 1.97E-05      | 6   | 43381582 | ILMN_1694711    | MAD2L1BP           | cis                         |       |        |                  |                |
| rs10948071 | PP     | NA        | TTBK1;CRIP3;SLC22A7;ZNF318                  | 7      | LDproxy(CEU-1kg)  | 1                       | rs2841648  | LCL (MuTHER)                            | 2.12E-05      | 6   | 43377157 | ILMN_1683279    | PEX6               | cis                         |       |        |                  |                |
| rs10948071 | PP     | NA        | TTBK1;CRIP3;SLC22A7;ZNF318                  | 7      | LDproxy(CEU-1kg)  | 1                       | rs1574430  | LCL (MuTHER)                            | 2.13E-05      | 6   | 43377007 | ILMN_1683279    | PEX6               | cis                         |       |        |                  |                |
| rs10948071 | PP     | NA        | TTBK1;CRIP3;SLC22A7;ZNF318                  | 7      | LDproxy(CEU-1kg)  | 1                       | rs2242416  | LCL (MuTHER)                            | 2.27E-05      | 6   | 43381582 | ILMN_1683279    | PEX6               | cis                         |       |        |                  |                |
| rs10948071 | PP     | NA        | TTBK1;CRIP3;SLC22A7;ZNF318                  | 7      | LDproxy(CEU-1kg)  | 1                       | rs2469     | LCL (MuTHER)                            | 2.74E-05      | 6   | 43407301 | ILMN_1683279    | PEX6               | cis                         |       |        |                  |                |
| rs10948071 | PP     | NA        | TTBK1;CRIP3;SLC22A7;ZNF318                  | 7      | LDproxy(CEU-1kg)  | 1                       | rs2469     | Lymph                                   | 0.00015064    | 6   | 43407301 | GI_37552195-S   | CRIP3              | cis                         |       |        |                  |                |
| rs10948071 | PP     | NA        | TTBK1;CRIP3;SLC22A7;ZNF318                  | 7      | LDproxy(CEU-1kg)  | 1                       | rs2242416  | Liver(UChicago)                         | 0.00071416    | 6   | 43381582 | A_23_P156562    | CRIP3              | cis                         |       |        |                  |                |
| rs10948071 | PP     | NA        | TTBK1;CRIP3;SLC22A7;ZNF318                  | 7      | LDproxy(CEU-1kg)  | 1                       | rs2469     | Liver(Greenawalt)                       | 1.75E-06;2.2E | 6   | 43407301 | 10025906643;100 | SLC22A7;SLC22A7    | cis                         |       |        |                  |                |
| rs10948071 | PP     | NA        | TTBK1;CRIP3;SLC22A7;ZNF318                  | 7      | LDproxy(CEU-1kg)  | 0.965                   | rs2125738  | Whole blood (CHARGE)                    | 1.78E-18      | 6   | 43435728 | 50193           | ZNF318             | cis                         | -8.77 | A      | 6                | 43411954       |
| rs10948071 | PP     | NA        | TTBK1;CRIP3;SLC22A7;ZNF318                  | 7      | LDproxy(CEU-1kg)  | 0.965                   | rs2125737  | Whole blood (CHARGE)                    | 1.53E-16      | 6   | 43435514 | 50193           | ZNF318             | cis                         | -8.25 | C      | 6                | 43411954       |
| rs10948071 | PP     | NA        | TTBK1;CRIP3;SLC22A7;ZNF318                  | 7      | LDproxy(CEU-1kg)  | 0.965                   | rs4714677  | Whole blood (CHARGE)                    | 1.53E-16      | 6   | 43435017 | 50193           | ZNF318             | cis                         | -8.25 | G      | 6                | 43411954       |
| rs10948071 | PP     | NA        | TTBK1;CRIP3;SLC22A7;ZNF318                  | 7      | LDproxy(CEU-1kg)  | 0.965                   | rs9369407  | Whole blood (CHARGE)                    | 1.53E-16      | 6   | 43435353 | 50193           | ZNF318             | cis                         | -8.25 | A      | 6                | 43411954       |
| rs10948071 | PP     | NA        | TTBK1;CRIP3;SLC22A7;ZNF318                  | 7      | LDproxy(CEU-1kg)  | 0.965                   | rs9381237  | Whole blood (CHARGE)                    | 1.53E-16      | 6   | 43428388 | 50193           | ZNF318             | cis                         | -8.25 | T      | 6                | 43411954       |
| rs10948071 | PP     | NA        | TTBK1;CRIP3;SLC22A7;ZNF318                  | 7      | LDproxy(CEU-1kg)  | 0.965                   | rs2841642  | Whole blood (CHARGE)                    | 1.66E-16      | 6   | 43410263 | 50193           | ZNF318             | cis                         | -8.24 | G      | 6                | 43411954       |
| rs10948071 | PP     | NA        | TTBK1;CRIP3;SLC22A7;ZNF318                  | 7      | LDproxy(CEU-1kg)  | 0.965                   | rs2254303  | Intestine (normal ileum)                | 5.70E-14      | 6   | 43276390 |                 | CRIP3              | cis                         |       |        |                  |                |
| rs10948071 | PP     | NA        | TTBK1;CRIP3;SLC22A7;ZNF318                  | 7      | LDproxy(CEU-1kg)  | 0.965                   | rs2125738  | Monocytes                               | 4.97E-12      | 6   | 43435728 |                 | ZNF318             | cis                         |       |        |                  |                |
| rs10948071 | PP     | NA        | TTBK1;CRIP3;SLC22A7;ZNF318                  | 7      | LDproxy(CEU-1kg)  | 0.965                   | rs9381237  | Blood(Fehrmann et al)                   | 2.50E-06      | 6   | 43428388 | 50193           | ZNF318             | cis                         |       |        |                  |                |
| rs10948071 | PP     | NA        | TTBK1;CRIP3;SLC22A7;ZNF318                  | 7      | LDproxy(CEU-1kg)  | 0.965                   | rs2254303  | Skin (MuTHER)                           | 1.29E-05      | 6   | 43384368 | ILMN_1694711    | MAD2L1BP           | cis                         |       |        |                  |                |
| rs10948071 | PP     | NA        | TTBK1;CRIP3;SLC22A7;ZNF318                  | 7      | LDproxy(CEU-1kg)  | 0.965                   | rs2125737  | LCL (MuTHER)                            | 1.59E-05      | 6   | 43435514 | ILMN_1683279    | PEX6               | cis                         |       |        |                  |                |
| rs10948071 | PP     | NA        | TTBK1;CRIP3;SLC22A7;ZNF318                  | 7      | LDproxy(CEU-1kg)  | 0.965                   | rs9369407  | LCL (MuTHER)                            | 1.59E-05      | 6   | 43435353 | ILMN_1683279    | PEX6               | cis                         |       |        |                  |                |
| rs10948071 | PP     | NA        | TTBK1;CRIP3;SLC22A7;ZNF318                  | 7      | LDproxy(CEU-1kg)  | 0.965                   | rs4714677  | LCL (MuTHER)                            | 1.59E-05      | 6   | 43435017 | ILMN_1683279    | PEX6               | cis                         |       |        |                  |                |
| rs10948071 | PP     | NA        | TTBK1;CRIP3;SLC22A7;ZNF318                  | 7      | LDproxy(CEU-1kg)  | 0.965                   | rs2841642  | LCL (MuTHER)                            | 1.63E-05      | 6   | 43410263 | ILMN_1683279    | PEX6               | cis                         |       |        |                  |                |
| rs10948071 | PP     | NA        | TTBK1;CRIP3;SLC22A7;ZNF318                  | 7      | LDproxy(CEU-1kg)  | 0.965                   | rs9381237  | LCL (MuTHER)                            | 1.63E-05      | 6   | 43428388 | ILMN_1683279    | PEX6               | cis                         |       |        |                  |                |
| rs10948071 | PP     | NA        | TTBK1;CRIP3;SLC22A7;ZNF318                  | 7      | LDproxy(CEU-1kg)  | 0.965                   | rs2125738  | LCL (MuTHER)                            | 1.97E-05      | 6   | 43435728 | ILMN_1683279    | PEX6               | cis                         |       |        |                  |                |
| rs10948071 | PP     | NA        | TTBK1;CRIP3;SLC22A7;ZNF318                  | 7      | LDproxy(CEU-1kg)  | 0.965                   | rs2254303  | LCL (MuTHER)                            | 2.39E-05      | 6   | 43384368 | ILMN_1683279    | PEX6               | cis                         |       |        |                  |                |
| rs10948071 | PP     | NA        | TTBK1;CRIP3;SLC22A7;ZNF318                  | 7      | LDproxy(CEU-1kg)  | 0.965                   | rs9369407  | Skin (MuTHER)                           | 2.98E-05      | 6   | 43435353 | ILMN_1694711    | MAD2L1BP           | cis                         |       |        |                  |                |
| rs10948071 | PP     | NA        | TTBK1;CRIP3;SLC22A7;ZNF318                  | 7      | LDproxy(CEU-1kg)  | 0.965                   | rs2125737  | Skin (MuTHER)                           | 2.98E-05      | 6   | 43435514 | ILMN_1694711    | MAD2L1BP           | cis                         |       |        |                  |                |
| rs10948071 | PP     | NA        | TTBK1;CRIP3;SLC22A7;ZNF318                  | 7      | LDproxy(CEU-1kg)  | 0.965                   | rs4714677  | Skin (MuTHER)                           | 2.98E-05      | 6   | 43435017 | ILMN_1694711    | MAD2L1BP           | cis                         |       |        |                  |                |

| IndexSNP   | Traits      | InRefGene | RefGenes60kb               | Locus# | Index/LD status   | r <sup>2</sup> to index | eSNPid     | Tissue                                   | eSNP P value  | Chr | B36pos   | ArrayID         | Transcript        | type of eQTL (cis or trans) | Beta  | Allele | Probe Chromosome | Probe Position |
|------------|-------------|-----------|----------------------------|--------|-------------------|-------------------------|------------|------------------------------------------|---------------|-----|----------|-----------------|-------------------|-----------------------------|-------|--------|------------------|----------------|
| rs10948071 | PP          | NA        | TTBK1;CRIP3;SLC22A7;ZNF318 | 7      | LDproxy(CEU-1kg)  | 0.965                   | rs2841642  | Skin (MuTHER)                            | 3.15E-05      | 6   | 43410263 | ILMN_1694711    | MAD2L1BP          | cis                         |       |        |                  |                |
| rs10948071 | PP          | NA        | TTBK1;CRIP3;SLC22A7;ZNF318 | 7      | LDproxy(CEU-1kg)  | 0.965                   | rs9381237  | Skin (MuTHER)                            | 3.15E-05      | 6   | 43428388 | ILMN_1694711    | MAD2L1BP          | cis                         |       |        |                  |                |
| rs10948071 | PP          | NA        | TTBK1;CRIP3;SLC22A7;ZNF318 | 7      | LDproxy(CEU-1kg)  | 0.965                   | rs2125738  | Skin (MuTHER)                            | 3.27E-05      | 6   | 43435728 | ILMN_1694711    | MAD2L1BP          | cis                         |       |        |                  |                |
| rs10948071 | PP          | NA        | TTBK1;CRIP3;SLC22A7;ZNF318 | 7      | LDproxy(CEU-1kg)  | 0.965                   | rs2254303  | Lymph                                    | 0.00025613    | 6   | 43384368 | GI_37552195-5   | CRIP3             | cis                         |       |        |                  |                |
| rs10948071 | PP          | NA        | TTBK1;CRIP3;SLC22A7;ZNF318 | 7      | LDproxy(CEU-1kg)  | 0.931                   | rs9369408  | Whole blood (CHARGE)                     | 1.72E-16      | 6   | 43440164 | 50193           | ZNF318            | cis                         | -8.24 | C      | 6                | 43411954       |
| rs10948071 | PP          | NA        | TTBK1;CRIP3;SLC22A7;ZNF318 | 7      | LDproxy(CEU-1kg)  | 0.931                   | rs9369408  | Skin (MuTHER)                            | 6.63E-06      | 6   | 43440164 | ILMN_1694711    | MAD2L1BP          | cis                         |       |        |                  |                |
| rs10948071 | PP          | NA        | TTBK1;CRIP3;SLC22A7;ZNF318 | 7      | LDproxy(CEU-1kg)  | 0.931                   | rs9369408  | LCL (MuTHER)                             | 1.72E-05      | 6   | 43440164 | ILMN_1683279    | PEX6              | cis                         |       |        |                  |                |
| rs10948071 | PP          | NA        | TTBK1;CRIP3;SLC22A7;ZNF318 | 7      | LDproxy(CEU-Rel2) | 0.892                   | rs2396002  | LCL (MuTHER)                             | 5.60E-07      | 6   | 43367990 | ILMN_1694711    | MAD2L1BP          | cis                         |       |        |                  |                |
| rs10948071 | PP          | NA        | TTBK1;CRIP3;SLC22A7;ZNF318 | 7      | LDproxy(CEU-Rel2) | 0.892                   | rs2396002  | Whole blood (CHARGE)                     | 5.68E-07      | 6   | 43367990 | 7050040         | ZNF318            | cis                         | -5.00 | C      | 6                | 43412137       |
| rs10948071 | PP          | NA        | TTBK1;CRIP3;SLC22A7;ZNF318 | 7      | LDproxy(CEU-Rel2) | 0.892                   | rs2396002  | Skin (MuTHER)                            | 8.40E-06      | 6   | 43367990 | ILMN_1694711    | MAD2L1BP          | cis                         |       |        |                  |                |
| rs10948071 | PP          | NA        | TTBK1;CRIP3;SLC22A7;ZNF318 | 7      | LDproxy(CEU-Rel2) | 0.828                   | rs2841647  | Whole blood (CHARGE)                     | 3.05E-16      | 6   | 43377157 | 50193           | ZNF318            | cis                         | -8.17 | C      | 6                | 43411954       |
| rs10948071 | PP          | NA        | TTBK1;CRIP3;SLC22A7;ZNF318 | 7      | LDproxy(CEU-Rel2) | 0.828                   | rs2841647  | Skin (MuTHER)                            | 1.15E-05      | 6   | 43377158 | ILMN_1694711    | MAD2L1BP          | cis                         |       |        |                  |                |
| rs10948071 | PP          | NA        | TTBK1;CRIP3;SLC22A7;ZNF318 | 7      | LDproxy(CEU-Rel2) | 0.828                   | rs2841647  | LCL (MuTHER)                             | 2.68E-05      | 6   | 43377158 | ILMN_1683279    | PEX6              | cis                         |       |        |                  |                |
| rs10948071 | PP          | NA        | TTBK1;CRIP3;SLC22A7;ZNF318 | 7      | LDproxy(CEU-Rel2) | 0.748                   | rs4398731  | Liver (Greenawalt)                       | 1.26E-28      | 6   | 43387699 | 10025905145     | ZNF318            | cis                         |       |        |                  |                |
| rs10948071 | PP          | NA        | TTBK1;CRIP3;SLC22A7;ZNF318 | 7      | LDproxy(CEU-Rel2) | 0.748                   | rs6901866  | Monocytes                                | 1.18E-26      | 6   | 43368638 |                 | ZNF318            | cis                         |       |        |                  |                |
| rs10948071 | PP          | NA        | TTBK1;CRIP3;SLC22A7;ZNF318 | 7      | LDproxy(CEU-Rel2) | 0.748                   | rs4398731  | Visual cortex (all samples)              | 2.69E-25      | 6   | 43387699 | 10025905145     | ZNF318            | cis                         |       |        |                  |                |
| rs10948071 | PP          | NA        | TTBK1;CRIP3;SLC22A7;ZNF318 | 7      | LDproxy(CEU-Rel2) | 0.748                   | rs4398731  | omental                                  | 4.72E-23      | 6   | 43387699 | 10025905145     | ZNF318            | cis                         |       |        |                  |                |
| rs10948071 | PP          | NA        | TTBK1;CRIP3;SLC22A7;ZNF318 | 7      | LDproxy(CEU-Rel2) | 0.748                   | rs4398731  | SubCutAdipose(Greenawalt)                | 6.30E-19      | 6   | 43387699 | 10025905145     | ZNF318            | cis                         |       |        |                  |                |
| rs10948071 | PP          | NA        | TTBK1;CRIP3;SLC22A7;ZNF318 | 7      | LDproxy(CEU-Rel2) | 0.748                   | rs6901866  | Whole blood (CHARGE)                     | 5.81E-18      | 6   | 43368638 | 7050040         | ZNF318            | cis                         | -8.64 | C      | 6                | 43412137       |
| rs10948071 | PP          | NA        | TTBK1;CRIP3;SLC22A7;ZNF318 | 7      | LDproxy(CEU-Rel2) | 0.748                   | rs16896398 | Whole blood (CHARGE)                     | 8.93E-18      | 6   | 43370682 | 7050040         | ZNF318            | cis                         | -8.59 | T      | 6                | 43412137       |
| rs10948071 | PP          | NA        | TTBK1;CRIP3;SLC22A7;ZNF318 | 7      | LDproxy(CEU-Rel2) | 0.748                   | rs4398731  | Whole blood (CHARGE)                     | 1.55E-17      | 6   | 43387699 | 7050040         | ZNF318            | cis                         | -8.52 | A      | 6                | 43412137       |
| rs10948071 | PP          | NA        | TTBK1;CRIP3;SLC22A7;ZNF318 | 7      | LDproxy(CEU-Rel2) | 0.748                   | rs4398731  | Prefrontal cortex (normal samples)       | 8.53E-17      | 6   | 43387699 | 10025905145     | ZNF318            | cis                         |       |        |                  |                |
| rs10948071 | PP          | NA        | TTBK1;CRIP3;SLC22A7;ZNF318 | 7      | LDproxy(CEU-Rel2) | 0.748                   | rs4398731  | Whole blood (PAX) in breast cancer survi | 6.97E-11      | 6   | 43387699 | 6200307         | ZNF318            | cis                         |       |        |                  |                |
| rs10948071 | PP          | NA        | TTBK1;CRIP3;SLC22A7;ZNF318 | 7      | LDproxy(CEU-Rel2) | 0.748                   | rs4398731  | Intestine (normal ileum)                 | 5.10E-10      | 6   | 43279721 |                 | CRIP3             | cis                         |       |        |                  |                |
| rs10948071 | PP          | NA        | TTBK1;CRIP3;SLC22A7;ZNF318 | 7      | LDproxy(CEU-Rel2) | 0.748                   | rs4398731  | Cerebellum (Huntington's)                | 8.76E-10      | 6   | 43387699 | 10025905145     | ZNF318            | cis                         |       |        |                  |                |
| rs10948071 | PP          | NA        | TTBK1;CRIP3;SLC22A7;ZNF318 | 7      | LDproxy(CEU-Rel2) | 0.748                   | rs4398731  | Liver (Schroeder)                        | 1.82E-09      | 6   | 43387699 |                 | ZNF318            | cis                         |       |        |                  |                |
| rs10948071 | PP          | NA        | TTBK1;CRIP3;SLC22A7;ZNF318 | 7      | LDproxy(CEU-Rel2) | 0.748                   | rs4398731  | Lymph                                    | 3.44E-08      | 6   | 43387699 | GI_37552195-5   | CRIP3             | cis                         |       |        |                  |                |
| rs10948071 | PP          | NA        | TTBK1;CRIP3;SLC22A7;ZNF318 | 7      | LDproxy(CEU-Rel2) | 0.748                   | rs6901866  | LCL (MuTHER)                             | 1.72E-05      | 6   | 43368638 | ILMN_1694711    | MAD2L1BP          | cis                         |       |        |                  |                |
| rs10948071 | PP          | NA        | TTBK1;CRIP3;SLC22A7;ZNF318 | 7      | LDproxy(CEU-Rel2) | 0.748                   | rs4398731  | Tcells                                   | 1.83E-05      | 6   | 43387699 |                 | PTK7              | cis                         |       |        |                  |                |
| rs10948071 | PP          | NA        | TTBK1;CRIP3;SLC22A7;ZNF318 | 7      | LDproxy(CEU-Rel2) | 0.748                   | rs6901866  | Skin (MuTHER)                            | 2.15E-05      | 6   | 43368638 | ILMN_1694711    | MAD2L1BP          | cis                         |       |        |                  |                |
| rs10948071 | PP          | NA        | TTBK1;CRIP3;SLC22A7;ZNF318 | 7      | LDproxy(CEU-Rel2) | 0.748                   | rs4398731  | LCL (MuTHER)                             | 2.20E-05      | 6   | 43387699 | ILMN_1694711    | MAD2L1BP          | cis                         |       |        |                  |                |
| rs10948071 | PP          | NA        | TTBK1;CRIP3;SLC22A7;ZNF318 | 7      | LDproxy(CEU-Rel2) | 0.748                   | rs4398731  | Skin (MuTHER)                            | 2.97E-05      | 6   | 43387699 | ILMN_1694711    | MAD2L1BP          | cis                         |       |        |                  |                |
| rs10948071 | PP          | NA        | TTBK1;CRIP3;SLC22A7;ZNF318 | 7      | LDproxy(CEU-Rel2) | 0.748                   | rs4398731  | Blood(Fehrmann et al)                    | 5.10E-20;1.00 | 6   | 43387699 | 50193;7210484   | ZNF318;RP3-330M21 | cis                         |       |        |                  |                |
| rs10948071 | PP          | NA        | TTBK1;CRIP3;SLC22A7;ZNF318 | 7      | LDproxy(CEU-Rel2) | 0.715                   | rs2279087  | Whole blood (CHARGE)                     | 1.75E-17      | 6   | 43407036 | 7050040         | ZNF318            | cis                         | -8.51 | G      | 6                | 43412137       |
| rs10948071 | PP          | NA        | TTBK1;CRIP3;SLC22A7;ZNF318 | 7      | LDproxy(CEU-Rel2) | 0.715                   | rs2279087  | Intestine (normal ileum)                 | 4.60E-10      | 6   | 43299058 |                 | CRIP3             | cis                         |       |        |                  |                |
| rs10948071 | PP          | NA        | TTBK1;CRIP3;SLC22A7;ZNF318 | 7      | LDproxy(CEU-Rel2) | 0.715                   | rs2279087  | LCL (MuTHER)                             | 1.75E-05      | 6   | 43407036 | ILMN_1694711    | MAD2L1BP          | cis                         |       |        |                  |                |
| rs10948071 | PP          | NA        | TTBK1;CRIP3;SLC22A7;ZNF318 | 7      | LDproxy(CEU-Rel2) | 0.715                   | rs2279087  | Skin (MuTHER)                            | 2.70E-05      | 6   | 43407036 | ILMN_1694711    | MAD2L1BP          | cis                         |       |        |                  |                |
| rs12244842 | DBP         | C10orf107 | C10orf107                  | 9      | LDproxy(CEU-1kg)  | 1                       | rs2393833  | Liver (ScanDB)                           | 8.10E-07      | 10  | 63115322 |                 | SGTA              | cis                         |       |        |                  |                |
| rs12244842 | DBP         | C10orf107 | C10orf107                  | 9      | LDproxy(CEU-1kg)  | 1                       | rs12246717 | Liver (ScanDB)                           | 9.54E-07      | 10  | 63129189 |                 | SERPIND1          | cis                         |       |        |                  |                |
| rs12244842 | DBP         | C10orf107 | C10orf107                  | 9      | LDproxy(CEU-1kg)  | 1                       | rs2393833  | Blood                                    | 0.0000286     | 10  | 63115322 | HSG00268758     | LOC219790         | cis                         |       |        |                  |                |
| rs7070797  | SBP         | NA        | C10orf107                  | 9      | LDproxy(CEU-Rel2) | 0.786                   | rs10509158 | Adipose                                  | 0.0000037     | 10  | 63177675 | HSG00269025     | NM_173554         | cis                         |       |        |                  |                |
| rs2166122  | MAP         | C10orf107 | C10orf107                  | 9      | LDproxy(CEU-Rel2) | 0.778                   | rs2588918  | EndometrialTumor                         | 0.00379818    | 10  | 63195030 |                 | C10orf107         | cis                         |       |        |                  |                |
| rs2166122  | MAP         | C10orf107 | C10orf107                  | 9      | LDproxy(CEU-Rel2) | 0.734                   | rs973237   | Liver (ScanDB)                           | 5.92E-07      | 10  | 63195307 |                 | FUCA1             | cis                         |       |        |                  |                |
| rs2166122  | MAP         | C10orf107 | C10orf107                  | 9      | LDproxy(CEU-Rel2) | 0.734                   | rs973237   | Prefrontal cortex (Alzheimer's)          | 9.15E-05      | 10  | 63195307 | 10025902662     | C10orf107         | cis                         |       |        |                  |                |
| rs2681472  | DBP/SBP/MAP | ATP2B1    | ATP2B1                     | 10     | IndexSNP          |                         | rs2681472  | Whole blood (CHARGE)                     | 1.83E-15      | 12  | 88533090 | 7320717         | WDR51B            | cis                         | 7.95  | G      | 12               | 88439646       |
| rs2681472  | DBP/SBP/MAP | ATP2B1    | ATP2B1                     | 10     | IndexSNP          |                         | rs2681472  | Liver (ScanDB)                           | 3.74E-07      | 12  | 88533090 |                 | LOC100131662      | cis                         |       |        |                  |                |
| rs2681472  | DBP/SBP/MAP | ATP2B1    | ATP2B1                     | 10     | IndexSNP          |                         | rs2681472  | Blood(Fehrmann et al)                    | 2.20E-08;2.20 | 12  | 88533090 | 6650035;7320717 | WDR51B;ATP2B1     | cis                         |       |        |                  |                |
| rs2681472  | DBP/SBP/MAP | ATP2B1    | ATP2B1                     | 10     | LDproxy(CEU-1kg)  | 1                       | rs11105368 | Whole blood (CHARGE)                     | 3.56E-15      | 12  | 88598572 | 7320717         | WDR51B            | cis                         | 7.87  | C      | 12               | 88439646       |
| rs2681472  | DBP/SBP/MAP | ATP2B1    | ATP2B1                     | 10     | LDproxy(CEU-1kg)  | 1                       | rs11105364 | Whole blood (CHARGE)                     | 3.80E-15      | 12  | 88593407 | 7320717         | WDR51B            | cis                         | 7.86  | G      | 12               | 88439646       |
| rs2681472  | DBP/SBP/MAP | ATP2B1    | ATP2B1                     | 10     | LDproxy(CEU-1kg)  | 1                       | rs11105354 | Whole blood (CHARGE)                     | 3.82E-15      | 12  | 88550654 | 7320717         | WDR51B            | cis                         | 7.86  | G      | 12               | 88439646       |
| rs2681472  | DBP/SBP/MAP | ATP2B1    | ATP2B1                     | 10     | LDproxy(CEU-1kg)  | 1                       | rs17249754 | Whole blood (CHARGE)                     | 4.81E-15      | 12  | 88584717 | 7320717         | WDR51B            | cis                         | 7.83  | A      | 12               | 88439646       |
| rs2681472  | DBP/SBP/MAP | ATP2B1    | ATP2B1                     | 10     | LDproxy(CEU-1kg)  | 1                       | rs12579302 | Whole blood (CHARGE)                     | 5.09E-15      | 12  | 88574634 | 7320717         | WDR51B            | cis                         | 7.82  | G      | 12               | 88439646       |
| rs2681472  | DBP/SBP/MAP | ATP2B1    | ATP2B1                     | 10     | LDproxy(CEU-Rel2) | 1                       | rs12230074 | Whole blood (CHARGE)                     | 5.11E-15      | 12  | 88614998 | 7320717         | WDR51B            | cis                         | 7.82  | G      | 12               | 88439646       |
| rs2681472  | DBP/SBP/MAP | ATP2B1    | ATP2B1                     | 10     | LDproxy(CEU-Rel2) | 1                       | rs11105378 | Whole blood (CHARGE)                     | 7.12E-15      | 12  | 88614872 | 7320717         | WDR51B            | cis                         | 7.78  | T      | 12               | 88439646       |
| rs2681472  | DBP/SBP/MAP | ATP2B1    | ATP2B1                     | 10     | LDproxy(CEU-Rel2) | 0.92                    | rs2681492  | Whole blood (CHARGE)                     | 7.76E-13      | 12  | 88537220 |                 | WDR51B            | cis                         | 7.17  | C      | 12               | 88439646       |
| rs2681472  | DBP/SBP/MAP | ATP2B1    | ATP2B1                     | 10     | LDproxy(CEU-Rel2) | 0.92                    | rs2681492  | Liver (ScanDB)                           | 3.15E-07      | 12  | 88537220 |                 | LOC100131662      | cis                         |       |        |                  |                |
| rs2681472  | DBP/SBP/MAP | ATP2B1    | ATP2B1                     | 10     | LDproxy(CEU-Rel2) | 0.92                    | rs2681492  | Blood(Fehrmann et al)                    | 2.10E-08;5.90 | 12  | 88537220 | 6650035;7320717 | WDR51B;ATP2B1     | cis                         |       |        |                  |                |
| rs2681472  | DBP/SBP/MAP | ATP2B1    | ATP2B1                     | 10     | LDproxy(CEU-1kg)  | 0.915                   | rs4842666  | Whole blood (CHARGE)                     | 3.74E-07      | 12  | 88465680 | 7160609         | WDR51B            | cis                         | -5.08 | C      | 12               | 88337954       |
| rs2681472  | DBP/SBP/MAP | ATP2B1    | ATP2B1                     | 10     | LDproxy(CEU-1kg)  | 0.915                   | rs4842666  | Monocytes (CD14+)                        | 4.35E-05      | 12  | 88465680 | 9N1yRY16R8pJ.Sv | GALNT4            | cis                         |       |        |                  |                |

| IndexSNP   | Traits      | InRefGene | RefGenes60kb                    | Locus# | Index/LD status   | r <sup>2</sup> to index | eSNPid     | Tissue                             | eSNP P value     | Chr | B36pos    | ArrayID          | Transcript        | type of eQTL (cis or trans) | Beta  | Allele | Probe Chromosome | Probe Position |
|------------|-------------|-----------|---------------------------------|--------|-------------------|-------------------------|------------|------------------------------------|------------------|-----|-----------|------------------|-------------------|-----------------------------|-------|--------|------------------|----------------|
| rs2681472  | DBP/SBP/MAP | ATP2B1    | ATP2B1                          | 10     | LDproxy(CEU-H3)   | 0.805                   | rs11105328 | Monocytes (CD14+)                  | 5.41E-05         | 12  | 88466521  | 9N1yRY16R8pJ.Sv  | GALNT4            | cis                         |       |        |                  |                |
| rs3184504  | DBP/MAP     | SH2B3     | ATXN2;SH2B3                     | 11     | IndexSNP          |                         | rs3184504  | Liver(Greenawalt)                  | 4.63E-26         | 12  | 110368991 | 10023848139      | AL049919          | cis                         |       |        |                  |                |
| rs4766578  | SBP         | SH2B3     | ATXN2;SH2B3                     | 11     | IndexSNP          |                         | rs4766578  | Whole blood (CHARGE)               | 5.62E-20         | 12  | 110388754 | 6560301          | SH2B3             | cis                         | 9.15  | T      | 12               | 110373489      |
| rs3184504  | DBP/MAP     | SH2B3     | ATXN2;SH2B3                     | 11     | IndexSNP          |                         | rs3184504  | Whole blood (CHARGE)               | 5.02E-19         | 12  | 110368991 | 6560301          | SH2B3             | cis                         | 8.91  | T      | 12               | 110373489      |
| rs3184504  | DBP/MAP     | SH2B3     | ATXN2;SH2B3                     | 11     | IndexSNP          |                         | rs3184504  | Visual cortex (Huntington's)       | 1.75E-12         | 12  | 110368991 | 10023848139      | AL049919          | cis                         |       |        |                  |                |
| rs3184504  | DBP/MAP     | SH2B3     | ATXN2;SH2B3                     | 11     | IndexSNP          |                         | rs3184504  | Prefrontal cortex (normal samples) | 7.00E-11         | 12  | 110368991 | 10023848139      | AL049919          | cis                         |       |        |                  |                |
| rs3184504  | DBP/MAP     | SH2B3     | ATXN2;SH2B3                     | 11     | IndexSNP          |                         | rs3184504  | Whole blood (CHARGE)               | 2.00E-07         | 12  | 110368991 | 7570673          | UPP1              | trans                       | 5.20  | T      | 7                | 48114477       |
| rs3184504  | DBP/MAP     | SH2B3     | ATXN2;SH2B3                     | 11     | IndexSNP          |                         | rs3184504  | Blood(Fehrmann et al)              | 3.50E-07         | 12  | 110368991 | 6560301          | SH2B3;ATXN2       | cis                         |       |        |                  |                |
| rs3184504  | DBP/MAP     | SH2B3     | ATXN2;SH2B3                     | 11     | IndexSNP          |                         | rs3184504  | Blood                              | 0.0002037        | 12  | 110368991 | HSG00276844      | FLJ21127          | cis                         |       |        |                  |                |
| rs4766578  | SBP         | SH2B3     | ATXN2;SH2B3                     | 11     | LDproxy(CEU-Rel2) | 1                       | rs10774625 | Whole blood (CHARGE)               | 8.15E-20         | 12  | 110394602 | 6560301          | SH2B3             | cis                         | 9.11  | A      | 12               | 110373489      |
| rs3184504  | DBP/MAP     | SH2B3     | ATXN2;SH2B3                     | 11     | LDproxy(CEU-Rel2) | 1                       | rs653178   | Whole blood (CHARGE)               | 1.68E-19         | 12  | 110492139 | 6560301          | SH2B3             | cis                         | 9.03  | C      | 12               | 110373489      |
| rs4766578  | SBP         | SH2B3     | ATXN2;SH2B3                     | 11     | LDproxy(CEU-Rel2) | 1                       | rs10774625 | Whole blood (CHARGE)               | 3.56E-08         | 12  | 110394602 | 2070170          | UBE2L6            | trans                       | 5.51  | A      | 11               | 57075756       |
| rs3184504  | DBP/MAP     | SH2B3     | ATXN2;SH2B3                     | 11     | LDproxy(CEU-Rel2) | 1                       | rs653178   | Cerebellum (all samples)           | 9.56E-08         | 12  | 110492139 | 10023848139      | AL049919          | cis                         |       |        |                  |                |
| rs3184504  | DBP/MAP     | SH2B3     | ATXN2;SH2B3                     | 11     | LDproxy(CEU-Rel2) | 1                       | rs653178   | Whole blood (CHARGE)               | 4.37E-07         | 12  | 110492139 | 7570673          | UPP1              | trans                       | 5.05  | C      | 7                | 48114477       |
| rs3184504  | DBP/MAP     | SH2B3     | ATXN2;SH2B3                     | 11     | LDproxy(CEU-Rel2) | 1                       | rs653178   | Blood(Fehrmann et al)              | 2.20E-07;9.8E-12 | 12  | 110492139 | 6560301;840253   | SH2B3;ATXN2;ALDH2 | cis                         |       |        |                  |                |
| rs4766578  | SBP         | SH2B3     | ATXN2;SH2B3                     | 11     | LDproxy(CEU-1kg)  | 0.967                   | rs3184504  | Liver(Greenawalt)                  | 4.63E-26         | 12  | 110368991 | 10023848139      | AL049919          | cis                         |       |        |                  |                |
| rs3184504  | DBP/MAP     | SH2B3     | ATXN2;SH2B3                     | 11     | LDproxy(CEU-1kg)  | 0.967                   | rs4766578  | Whole blood (CHARGE)               | 5.62E-20         | 12  | 110388754 | 6560301          | SH2B3             | cis                         | 9.15  | T      | 12               | 110373489      |
| rs4766578  | SBP         | SH2B3     | ATXN2;SH2B3                     | 11     | LDproxy(CEU-1kg)  | 0.967                   | rs3184504  | Whole blood (CHARGE)               | 5.02E-19         | 12  | 110368991 | 6560301          | SH2B3             | cis                         | 8.91  | T      | 12               | 110373489      |
| rs4766578  | SBP         | SH2B3     | ATXN2;SH2B3                     | 11     | LDproxy(CEU-1kg)  | 0.967                   | rs3184504  | Visual cortex (Huntington's)       | 1.75E-12         | 12  | 110368991 | 10023848139      | AL049919          | cis                         |       |        |                  |                |
| rs4766578  | SBP         | SH2B3     | ATXN2;SH2B3                     | 11     | LDproxy(CEU-1kg)  | 0.967                   | rs3184504  | Prefrontal cortex (normal samples) | 7.00E-11         | 12  | 110368991 | 10023848139      | AL049919          | cis                         |       |        |                  |                |
| rs4766578  | SBP         | SH2B3     | ATXN2;SH2B3                     | 11     | LDproxy(CEU-1kg)  | 0.967                   | rs3184504  | Whole blood (CHARGE)               | 2.00E-07         | 12  | 110368991 | 7570673          | UPP1              | trans                       | 5.20  | T      | 7                | 48114477       |
| rs4766578  | SBP         | SH2B3     | ATXN2;SH2B3                     | 11     | LDproxy(CEU-1kg)  | 0.967                   | rs3184504  | Blood(Fehrmann et al)              | 3.50E-07         | 12  | 110368991 | 6560301          | SH2B3;ATXN2       | cis                         |       |        |                  |                |
| rs4766578  | SBP         | SH2B3     | ATXN2;SH2B3                     | 11     | LDproxy(CEU-1kg)  | 0.967                   | rs3184504  | Blood                              | 0.0002037        | 12  | 110368991 | HSG00276844      | FLJ21127          | cis                         |       |        |                  |                |
| rs11072518 | SBP/MAP     | NA        | SCAMP5;COX5A;RPP25;C15orf17;MPI | 12     | IndexSNP          |                         | rs11072518 | Whole blood (CHARGE)               | 1.57E-34         | 15  | 73021663  | 4480132          | ULK3              | cis                         | 12.26 | T      | 15               | 72915933       |
| rs11072518 | SBP/MAP     | NA        | SCAMP5;COX5A;RPP25;C15orf17;MPI | 12     | IndexSNP          |                         | rs11072518 | omental                            | 1.11E-13         | 15  | 73021663  | 10023814330      | MPI               | cis                         |       |        |                  |                |
| rs11072518 | SBP/MAP     | NA        | SCAMP5;COX5A;RPP25;C15orf17;MPI | 12     | IndexSNP          |                         | rs11072518 | Subc adipose (MuTHER)              | 8.68E-09         | 15  | 73021663  | ILMN_1679495     | ULK3              | cis                         |       |        |                  |                |
| rs11072518 | SBP/MAP     | NA        | SCAMP5;COX5A;RPP25;C15orf17;MPI | 12     | IndexSNP          |                         | rs11072518 | Lymph                              | 8.12E-08         | 15  | 73021663  | GI_4505234-S     | MPI               | cis                         |       |        |                  |                |
| rs11072518 | SBP/MAP     | NA        | SCAMP5;COX5A;RPP25;C15orf17;MPI | 12     | IndexSNP          |                         | rs11072518 | LCL (MuTHER)                       | 5.27E-07         | 15  | 73021663  | ILMN_1761262     | MPI               | cis                         |       |        |                  |                |
| rs11072518 | SBP/MAP     | NA        | SCAMP5;COX5A;RPP25;C15orf17;MPI | 12     | IndexSNP          |                         | rs11072518 | Skin (MuTHER)                      | 7.69E-07         | 15  | 73021663  | ILMN_1679495     | ULK3              | cis                         |       |        |                  |                |
| rs11072518 | SBP/MAP     | NA        | SCAMP5;COX5A;RPP25;C15orf17;MPI | 12     | IndexSNP          |                         | rs11072518 | Bcells (CD19+)                     | 3.32E-06         | 15  | 73021663  | ubt12t1W7_Z_FO   | CSK               | cis                         |       |        |                  |                |
| rs11072518 | SBP/MAP     | NA        | SCAMP5;COX5A;RPP25;C15orf17;MPI | 12     | IndexSNP          |                         | rs11072518 | Prefrontal cortex (Alzheimer's)    | 3.32E-04         | 15  | 73021663  | 10023814330      | MPI               | cis                         |       |        |                  |                |
| rs11072518 | SBP/MAP     | NA        | SCAMP5;COX5A;RPP25;C15orf17;MPI | 12     | IndexSNP          |                         | rs11072518 | Monocytes (CD14+)                  | 0.000374         | 15  | 73021663  | r_tdn3VF1v3qULK3 | ULK3              | cis                         |       |        |                  |                |
| rs11072518 | SBP/MAP     | NA        | SCAMP5;COX5A;RPP25;C15orf17;MPI | 12     | IndexSNP          |                         | rs11072518 | Blood(Fehrmann et al)              | 1.90E-27;7.9E-15 | 15  | 73021663  | 3170239;4480132  | CSK;ULK3;COX5A;SC | cis                         |       |        |                  |                |
| rs11072518 | SBP/MAP     | NA        | SCAMP5;COX5A;RPP25;C15orf17;MPI | 12     | LDproxy(CEU-Rel2) | 0.861                   | rs3765066  | Whole blood (CHARGE)               | 5.55E-45         | 15  | 72927907  | 4480132          | ULK3              | cis                         | 14.07 | G      | 15               | 72915933       |
| rs11072518 | SBP/MAP     | NA        | SCAMP5;COX5A;RPP25;C15orf17;MPI | 12     | LDproxy(CEU-Rel2) | 0.861                   | rs3765066  | LCL in asthmatics (Liang 1kg)      | 1.06E-23         | 15  | 72927907  | 202472_at        | MPI               | cis                         |       |        |                  |                |
| rs11072518 | SBP/MAP     | NA        | SCAMP5;COX5A;RPP25;C15orf17;MPI | 12     | LDproxy(CEU-Rel2) | 0.861                   | rs3765066  | Subc adipose (MuTHER)              | 1.16E-09         | 15  | 72927907  | ILMN_1679495     | ULK3              | cis                         |       |        |                  |                |
| rs11072518 | SBP/MAP     | NA        | SCAMP5;COX5A;RPP25;C15orf17;MPI | 12     | LDproxy(CEU-Rel2) | 0.861                   | rs3765066  | Skin (MuTHER)                      | 1.15E-08         | 15  | 72927907  | ILMN_1679495     | ULK3              | cis                         |       |        |                  |                |
| rs11072518 | SBP/MAP     | NA        | SCAMP5;COX5A;RPP25;C15orf17;MPI | 12     | LDproxy(CEU-Rel2) | 0.861                   | rs3765066  | Lung                               | 1.32E-07         | 15  | 72927907  | 100151075_TGI_ε  | ULK3              | cis                         |       |        |                  |                |
| rs11072518 | SBP/MAP     | NA        | SCAMP5;COX5A;RPP25;C15orf17;MPI | 12     | LDproxy(CEU-Rel2) | 0.861                   | rs3765066  | Bcells (CD19+)                     | 4.65E-07         | 15  | 72927907  | ubt12t1W7_Z_FO   | CSK               | cis                         |       |        |                  |                |
| rs11072518 | SBP/MAP     | NA        | SCAMP5;COX5A;RPP25;C15orf17;MPI | 12     | LDproxy(CEU-Rel2) | 0.861                   | rs3765066  | LCL (MuTHER)                       | 4.26E-06         | 15  | 72927907  | ILMN_1761262     | MPI               | cis                         |       |        |                  |                |
| rs11072518 | SBP/MAP     | NA        | SCAMP5;COX5A;RPP25;C15orf17;MPI | 12     | LDproxy(CEU-H3)   | 0.77                    | rs8042694  | Whole blood (CHARGE)               | 2.10E-47         | 15  | 73012468  | 4480132          | ULK3              | cis                         | 14.46 | G      | 15               | 72915933       |
| rs11072518 | SBP/MAP     | NA        | SCAMP5;COX5A;RPP25;C15orf17;MPI | 12     | LDproxy(CEU-H3)   | 0.77                    | rs8042694  | Subc adipose (MuTHER)              | 3.46E-12         | 15  | 73012468  | ILMN_1679495     | ULK3              | cis                         |       |        |                  |                |
| rs11072518 | SBP/MAP     | NA        | SCAMP5;COX5A;RPP25;C15orf17;MPI | 12     | LDproxy(CEU-H3)   | 0.77                    | rs8042694  | LCL (MuTHER)                       | 4.95E-08         | 15  | 73012468  | ILMN_1761262     | MPI               | cis                         |       |        |                  |                |
| rs11072518 | SBP/MAP     | NA        | SCAMP5;COX5A;RPP25;C15orf17;MPI | 12     | LDproxy(CEU-H3)   | 0.77                    | rs8042694  | Skin (MuTHER)                      | 6.16E-07         | 15  | 73012468  | ILMN_1679495     | ULK3              | cis                         |       |        |                  |                |
| rs11072518 | SBP/MAP     | NA        | SCAMP5;COX5A;RPP25;C15orf17;MPI | 12     | LDproxy(CEU-H3)   | 0.77                    | rs8042694  | Lymph                              | 1.02E-05         | 15  | 73012468  | GI_4505234-S     | MPI               | cis                         |       |        |                  |                |
| rs11072518 | SBP/MAP     | NA        | SCAMP5;COX5A;RPP25;C15orf17;MPI | 12     | LDproxy(CEU-H3)   | 0.77                    | rs8042694  | Cerebellum (all samples)           | 9.88E-05         | 15  | 73012468  | 10025904895      | C15orf17          | cis                         |       |        |                  |                |
| rs11072518 | SBP/MAP     | NA        | SCAMP5;COX5A;RPP25;C15orf17;MPI | 12     | LDproxy(CEU-H3)   | 0.754                   | rs6495126  | Monocytes                          | 4.69E-54         | 15  | 72962079  |                  | ULK3              | cis                         |       |        |                  |                |
| rs11072518 | SBP/MAP     | NA        | SCAMP5;COX5A;RPP25;C15orf17;MPI | 12     | LDproxy(CEU-H3)   | 0.754                   | rs8031937  | Whole blood (CHARGE)               | 4.20E-48         | 15  | 72968174  | 4480132          | ULK3              | cis                         | 14.57 | A      | 15               | 72915933       |
| rs11072518 | SBP/MAP     | NA        | SCAMP5;COX5A;RPP25;C15orf17;MPI | 12     | LDproxy(CEU-H3)   | 0.754                   | rs6495126  | Whole blood (CHARGE)               | 4.69E-48         | 15  | 72962079  | 4480132          | ULK3              | cis                         | 14.57 | A      | 15               | 72915933       |
| rs11072518 | SBP/MAP     | NA        | SCAMP5;COX5A;RPP25;C15orf17;MPI | 12     | LDproxy(CEU-H3)   | 0.754                   | rs6495127  | Whole blood (CHARGE)               | 5.76E-48         | 15  | 72981543  | 4480132          | ULK3              | cis                         | 14.55 | C      | 15               | 72915933       |
| rs11072518 | SBP/MAP     | NA        | SCAMP5;COX5A;RPP25;C15orf17;MPI | 12     | LDproxy(CEU-H3)   | 0.754                   | rs8031937  | LCL in asthmatics (Liang 1kg)      | 4.58E-23         | 15  | 72968174  | 202472_at        | MPI               | cis                         |       |        |                  |                |
| rs11072518 | SBP/MAP     | NA        | SCAMP5;COX5A;RPP25;C15orf17;MPI | 12     | LDproxy(CEU-H3)   | 0.754                   | rs6495126  | LCL in asthmatics (Liang 1kg)      | 5.33E-23         | 15  | 72962079  | 202472_at        | MPI               | cis                         |       |        |                  |                |
| rs11072518 | SBP/MAP     | NA        | SCAMP5;COX5A;RPP25;C15orf17;MPI | 12     | LDproxy(CEU-H3)   | 0.754                   | rs7497201  | LCL in asthmatics (Liang 1kg)      | 2.74E-22         | 15  | 72977743  | 202472_at        | MPI               | cis                         |       |        |                  |                |
| rs11072518 | SBP/MAP     | NA        | SCAMP5;COX5A;RPP25;C15orf17;MPI | 12     | LDproxy(CEU-H3)   | 0.754                   | rs8031937  | Subc adipose (MuTHER)              | 2.11E-12         | 15  | 72968174  | ILMN_1679495     | ULK3              | cis                         |       |        |                  |                |
| rs11072518 | SBP/MAP     | NA        | SCAMP5;COX5A;RPP25;C15orf17;MPI | 12     | LDproxy(CEU-H3)   | 0.754                   | rs6495126  | Subc adipose (MuTHER)              | 2.18E-12         | 15  | 72962079  | ILMN_1679495     | ULK3              | cis                         |       |        |                  |                |
| rs11072518 | SBP/MAP     | NA        | SCAMP5;COX5A;RPP25;C15orf17;MPI | 12     | LDproxy(CEU-H3)   | 0.754                   | rs6495127  | Subc adipose (MuTHER)              | 2.66E-12         | 15  | 72981543  | ILMN_1679495     | ULK3              | cis                         |       |        |                  |                |
| rs11072518 | SBP/MAP     | NA        | SCAMP5;COX5A;RPP25;C15orf17;MPI | 12     | LDproxy(CEU-H3)   | 0.754                   | rs6495127  | Whole blood (Battle)               | 3.91E-11         | 15  | 75194490  |                  | COX5A             | cis                         |       |        |                  |                |
| rs11072518 | SBP/MAP     | NA        | SCAMP5;COX5A;RPP25;C15orf17;MPI | 12     | LDproxy(CEU-H3)   | 0.754                   | rs6495126  | Cerebellum (all samples)           | 3.89E-10         | 15  | 72962079  | 10023814330      |                   |                             |       |        |                  |                |



| IndexSNP   | Traits  | InRefGene | RefGenes60kb                    | Locus# | Index/LD status   | r <sup>2</sup> to index | eSNPid     | Tissue                        | eSNP P value  | Chr | B36pos               | ArrayID               | Transcript          | type of eQTL (cis or trans) | Beta  | Allele | Probe Chromosome | Probe Position |
|------------|---------|-----------|---------------------------------|--------|-------------------|-------------------------|------------|-------------------------------|---------------|-----|----------------------|-----------------------|---------------------|-----------------------------|-------|--------|------------------|----------------|
| rs11072518 | SBP/MAP | NA        | SCAMP5;COX5A;RPP25;C15orf17;MPI | 12     | LDproxy(CEU-H3)   | 0.754                   | rs6495127  | LCL (MUTHER)                  | 1.36E-07      | 15  | 72981543             | ILMN_1761262          | MPI                 | cis                         |       |        |                  |                |
| rs11072518 | SBP/MAP | NA        | SCAMP5;COX5A;RPP25;C15orf17;MPI | 12     | LDproxy(CEU-H3)   | 0.754                   | rs8031937  | LCL (MUTHER)                  | 2.10E-07      | 15  | 72968174             | ILMN_1761262          | MPI                 | cis                         |       |        |                  |                |
| rs11072518 | SBP/MAP | NA        | SCAMP5;COX5A;RPP25;C15orf17;MPI | 12     | LDproxy(CEU-H3)   | 0.754                   | rs6495126  | LCL (MUTHER)                  | 3.69E-07      | 15  | 72962079             | ILMN_1761262          | MPI                 | cis                         |       |        |                  |                |
| rs11072518 | SBP/MAP | NA        | SCAMP5;COX5A;RPP25;C15orf17;MPI | 12     | LDproxy(CEU-H3)   | 0.754                   | rs6495126  | Lymph                         | 7.22E-07      | 15  | 72962079             | GI_4505234-S          | MPI                 | cis                         |       |        |                  |                |
| rs11072518 | SBP/MAP | NA        | SCAMP5;COX5A;RPP25;C15orf17;MPI | 12     | LDproxy(CEU-H3)   | 0.754                   | rs6495127  | Skin (MUTHER)                 | 1.01E-06      | 15  | 72981543             | ILMN_1679495          | ULK3                | cis                         |       |        |                  |                |
| rs11072518 | SBP/MAP | NA        | SCAMP5;COX5A;RPP25;C15orf17;MPI | 12     | LDproxy(CEU-H3)   | 0.754                   | rs8031937  | Skin (MUTHER)                 | 1.52E-06      | 15  | 72968174             | ILMN_1679495          | ULK3                | cis                         |       |        |                  |                |
| rs11072518 | SBP/MAP | NA        | SCAMP5;COX5A;RPP25;C15orf17;MPI | 12     | LDproxy(CEU-H3)   | 0.754                   | rs6495126  | Skin (MUTHER)                 | 3.23E-06      | 15  | 72962079             | ILMN_1679495          | ULK3                | cis                         |       |        |                  |                |
| rs11072518 | SBP/MAP | NA        | SCAMP5;COX5A;RPP25;C15orf17;MPI | 12     | LDproxy(CEU-H3)   | 0.754                   | rs7497201  | Bcells (CD19+)                | 3.92E-06      | 15  | 72977743             | ubt12t1W7_Z_FO_CSK    | CSK                 | cis                         |       |        |                  |                |
| rs11072518 | SBP/MAP | NA        | SCAMP5;COX5A;RPP25;C15orf17;MPI | 12     | LDproxy(CEU-H3)   | 0.754                   | rs6495127  | Bcells (CD19+)                | 4.00E-06      | 15  | 72981543             | ubt12t1W7_Z_FO_CSK    | CSK                 | cis                         |       |        |                  |                |
| rs11072518 | SBP/MAP | NA        | SCAMP5;COX5A;RPP25;C15orf17;MPI | 12     | LDproxy(CEU-H3)   | 0.754                   | rs6495126  | Blood                         | 0.00000646    | 15  | 72962079             | HSG00291325           | MPI                 | cis                         |       |        |                  |                |
| rs11072518 | SBP/MAP | NA        | SCAMP5;COX5A;RPP25;C15orf17;MPI | 12     | LDproxy(CEU-H3)   | 0.754                   | rs8031937  | Bcells (CD19+)                | 6.61E-06      | 15  | 72968174             | ubt12t1W7_Z_FO_CSK    | CSK                 | cis                         |       |        |                  |                |
| rs11072518 | SBP/MAP | NA        | SCAMP5;COX5A;RPP25;C15orf17;MPI | 12     | LDproxy(CEU-H3)   | 0.754                   | rs6495126  | SchadtLiver                   | 8.60E-06      | 15  | 72962079             |                       | ULK3                | cis                         |       |        |                  |                |
| rs11072518 | SBP/MAP | NA        | SCAMP5;COX5A;RPP25;C15orf17;MPI | 12     | LDproxy(CEU-H3)   | 0.754                   | rs6495126  | Bcells (CD19+)                | 8.77E-06      | 15  | 72962079             | ubt12t1W7_Z_FO_CSK    | CSK                 | cis                         |       |        |                  |                |
| rs11072518 | SBP/MAP | NA        | SCAMP5;COX5A;RPP25;C15orf17;MPI | 12     | LDproxy(CEU-H3)   | 0.754                   | rs6495126  | Monocytes (CD14+)             | 7.18E-05      | 15  | 72962079             | Wu17hRSKTIKb C15ORF17 |                     | cis                         |       |        |                  |                |
| rs11072518 | SBP/MAP | NA        | SCAMP5;COX5A;RPP25;C15orf17;MPI | 12     | LDproxy(CEU-H3)   | 0.754                   | rs6495127  | Monocytes (CD14+)             | 7.50E-05      | 15  | 72981543             | Wu17hRSKTIKb C15ORF17 |                     | cis                         |       |        |                  |                |
| rs11072518 | SBP/MAP | NA        | SCAMP5;COX5A;RPP25;C15orf17;MPI | 12     | LDproxy(CEU-H3)   | 0.754                   | rs8031937  | Monocytes (CD14+)             | 0.000101      | 15  | 72968174             | Wu17hRSKTIKb C15ORF17 |                     | cis                         |       |        |                  |                |
| rs11072518 | SBP/MAP | NA        | SCAMP5;COX5A;RPP25;C15orf17;MPI | 12     | LDproxy(CEU-H3)   | 0.754                   | rs7497201  | Monocytes (CD14+)             | 0.000152      | 15  | 72977743             | Wu17hRSKTIKb C15ORF17 |                     | cis                         |       |        |                  |                |
| rs11072518 | SBP/MAP | NA        | SCAMP5;COX5A;RPP25;C15orf17;MPI | 12     | LDproxy(CEU-H3)   | 0.754                   | rs6495126  | Adipose                       | 0.0001963     | 15  | 72962079             | HSG00291325           | MPI                 | cis                         |       |        |                  |                |
| rs11072518 | SBP/MAP | NA        | SCAMP5;COX5A;RPP25;C15orf17;MPI | 12     | LDproxy(CEU-H3)   | 0.754                   | rs6495126  | Induced sputum (COPD cases)   | 0.00037621    | 15  | 72962079             | 224805_s_at           | C15orf17            | cis                         |       |        |                  |                |
| rs11072518 | SBP/MAP | NA        | SCAMP5;COX5A;RPP25;C15orf17;MPI | 12     | LDproxy(CEU-H3)   | 0.754                   | rs6495126  | Blood(Fehrmann et al)         | 2.00E-28;3.0E | 15  | 72962079             | 3170239;4480132       | CSK;ULK3;C15orf17;C | cis                         |       |        |                  |                |
| rs11072518 | SBP/MAP | NA        | SCAMP5;COX5A;RPP25;C15orf17;MPI | 12     | LDproxy(CEU-H3)   | 0.751                   | rs11636952 | LCL in asthmatics (Liang 1kg) | 2.98E-23      | 15  | 72901375             | 202472_at             | MPI                 | cis                         |       |        |                  |                |
| rs11072518 | SBP/MAP | NA        | SCAMP5;COX5A;RPP25;C15orf17;MPI | 12     | LDproxy(CEU-H3)   | 0.751                   | rs11636952 | Bcells (CD19+)                | 1.06E-08      | 15  | 72901375             | ubt12t1W7_Z_FO_CSK    | CSK                 | cis                         |       |        |                  |                |
| rs11072518 | SBP/MAP | NA        | SCAMP5;COX5A;RPP25;C15orf17;MPI | 12     | LDproxy(CEU-1kg)  | 0.75                    | rs1133323  | Monocytes                     | 8.25E-26      | 15  | 72999278             |                       | ULK3                | cis                         |       |        |                  |                |
| rs11072518 | SBP/MAP | NA        | SCAMP5;COX5A;RPP25;C15orf17;MPI | 12     | LDproxy(CEU-1kg)  | 0.75                    | rs1133323  | Whole blood (CHARGE)          | 5.97E-21      | 15  | 72999278             | 4480132               | ULK3                | cis                         | -9.39 | T      | 15               | 72915933       |
| rs11072518 | SBP/MAP | NA        | SCAMP5;COX5A;RPP25;C15orf17;MPI | 12     | LDproxy(CEU-1kg)  | 0.75                    | rs1133323  | LCL (MUTHER)                  | 3.18E-08      | 15  | 72999278             | ILMN_1761262          | MPI                 | cis                         |       |        |                  |                |
| rs11072518 | SBP/MAP | NA        | SCAMP5;COX5A;RPP25;C15orf17;MPI | 12     | LDproxy(CEU-1kg)  | 0.75                    | rs1133323  | LCL (MUTHER)                  | 1.30E-05      | 15  | 72999278             | ILMN_1679495          | ULK3                | cis                         |       |        |                  |                |
| rs11072518 | SBP/MAP | NA        | SCAMP5;COX5A;RPP25;C15orf17;MPI | 12     | LDproxy(CEU-1kg)  | 0.75                    | rs1133323  | Sub adipose (MUTHER)          | 2.40E-05      | 15  | 72999278             | ILMN_2364535          | SNUPN               | cis                         |       |        |                  |                |
| rs11072518 | SBP/MAP | NA        | SCAMP5;COX5A;RPP25;C15orf17;MPI | 12     | LDproxy(CEU-1kg)  | 0.75                    | rs1133323  | Bcells (CD19+)                | 3.86E-05      | 15  | 72999278             | ubt12t1W7_Z_FO_CSK    | CSK                 | cis                         |       |        |                  |                |
| rs11072518 | SBP/MAP | NA        | SCAMP5;COX5A;RPP25;C15orf17;MPI | 12     | LDproxy(CEU-Rel2) | 0.735                   | rs4886633  | Whole blood (CHARGE)          | 3.99E-48      | 15  | 72965260             | 4480132               | ULK3                | cis                         | 14.58 | G      | 15               | 72915933       |
| rs11072518 | SBP/MAP | NA        | SCAMP5;COX5A;RPP25;C15orf17;MPI | 12     | LDproxy(CEU-Rel2) | 0.735                   | rs4886633  | LCL in asthmatics (Liang 1kg) | 5.73E-23      | 15  | 72965260             | 202472_at             | MPI                 | cis                         |       |        |                  |                |
| rs11072518 | SBP/MAP | NA        | SCAMP5;COX5A;RPP25;C15orf17;MPI | 12     | LDproxy(CEU-H3)   | 0.733                   | rs1378942  | Monocytes                     | 3.21E-35      | 15  | 72864420             |                       | ULK3                | cis                         |       |        |                  |                |
| rs11072518 | SBP/MAP | NA        | SCAMP5;COX5A;RPP25;C15orf17;MPI | 12     | LDproxy(CEU-Rel2) | 0.733                   | rs1378940  | Whole blood (CHARGE)          | 6.15E-35      | 15  | 72870547             | 4480132               | ULK3                | cis                         | 12.33 | C      | 15               | 72915933       |
| rs11072518 | SBP/MAP | NA        | SCAMP5;COX5A;RPP25;C15orf17;MPI | 12     | LDproxy(CEU-Rel2) | 0.733                   | rs3784789  | Whole blood (CHARGE)          | 3.65E-34      | 15  | 72869605             | 4480132               | ULK3                | cis                         | 12.19 | C      | 15               | 72915933       |
| rs11072518 | SBP/MAP | NA        | SCAMP5;COX5A;RPP25;C15orf17;MPI | 12     | LDproxy(CEU-Rel2) | 0.733                   | rs1378941  | Whole blood (CHARGE)          | 4.77E-34      | 15  | 72867203             | 4480132               | ULK3                | cis                         | 12.17 | C      | 15               | 72915933       |
| rs11072518 | SBP/MAP | NA        | SCAMP5;COX5A;RPP25;C15orf17;MPI | 12     | LDproxy(CEU-Rel2) | 0.733                   | rs4886410  | Whole blood (CHARGE)          | 6.23E-34      | 15  | 72852697             | 4480132               | ULK3                | cis                         | 12.14 | G      | 15               | 72915933       |
| rs11072518 | SBP/MAP | NA        | SCAMP5;COX5A;RPP25;C15orf17;MPI | 12     | LDproxy(CEU-H3)   | 0.733                   | rs1378942  | Whole blood (CHARGE)          | 5.71E-33      | 15  | 72864420             | 4480132               | ULK3                | cis                         | 11.96 | C      | 15               | 72915933       |
| rs11072518 | SBP/MAP | NA        | SCAMP5;COX5A;RPP25;C15orf17;MPI | 12     | LDproxy(CEU-Rel2) | 0.733                   | rs1378940  | Whole blood (Battle)          | 1.79E-27      | 15  | 75083494             |                       | CSK                 | cis                         |       |        |                  |                |
| rs11072518 | SBP/MAP | NA        | SCAMP5;COX5A;RPP25;C15orf17;MPI | 12     | LDproxy(CEU-Rel2) | 0.733                   | rs1378940  | Bcells (CD19+)                | 1.33E-08      | 15  | 72870547             | ubt12t1W7_Z_FO_CSK    | CSK                 | cis                         |       |        |                  |                |
| rs11072518 | SBP/MAP | NA        | SCAMP5;COX5A;RPP25;C15orf17;MPI | 12     | LDproxy(CEU-Rel2) | 0.733                   | rs1378940  | Skin (MUTHER)                 | 1.37E-08      | 15  | 72870547             | ILMN_1679495          | ULK3                | cis                         |       |        |                  |                |
| rs11072518 | SBP/MAP | NA        | SCAMP5;COX5A;RPP25;C15orf17;MPI | 12     | LDproxy(CEU-Rel2) | 0.733                   | rs3784789  | Skin (MUTHER)                 | 1.75E-08      | 15  | 72869605             | ILMN_1679495          | ULK3                | cis                         |       |        |                  |                |
| rs11072518 | SBP/MAP | NA        | SCAMP5;COX5A;RPP25;C15orf17;MPI | 12     | LDproxy(CEU-Rel2) | 0.733                   | rs1378941  | Skin (MUTHER)                 | 2.59E-08      | 15  | 72867203             | ILMN_1679495          | ULK3                | cis                         |       |        |                  |                |
| rs11072518 | SBP/MAP | NA        | SCAMP5;COX5A;RPP25;C15orf17;MPI | 12     | LDproxy(CEU-H3)   | 0.733                   | rs1378942  | Skin (MUTHER)                 | 3.12E-08      | 15  | 72864420             | ILMN_1679495          | ULK3                | cis                         |       |        |                  |                |
| rs11072518 | SBP/MAP | NA        | SCAMP5;COX5A;RPP25;C15orf17;MPI | 12     | LDproxy(CEU-Rel2) | 0.733                   | rs4886410  | Skin (MUTHER)                 | 3.16E-08      | 15  | 72852697             | ILMN_1679495          | ULK3                | cis                         |       |        |                  |                |
| rs11072518 | SBP/MAP | NA        | SCAMP5;COX5A;RPP25;C15orf17;MPI | 12     | LDproxy(CEU-Rel2) | 0.733                   | rs3784789  | Sub adipose (MUTHER)          | 4.43E-08      | 15  | 72869605             | ILMN_1679495          | ULK3                | cis                         |       |        |                  |                |
| rs11072518 | SBP/MAP | NA        | SCAMP5;COX5A;RPP25;C15orf17;MPI | 12     | LDproxy(CEU-Rel2) | 0.733                   | rs1378941  | Sub adipose (MUTHER)          | 4.62E-08      | 15  | 72867203             | ILMN_1679495          | ULK3                | cis                         |       |        |                  |                |
| rs11072518 | SBP/MAP | NA        | SCAMP5;COX5A;RPP25;C15orf17;MPI | 12     | LDproxy(CEU-Rel2) | 0.733                   | rs1378940  | Sub adipose (MUTHER)          | 4.72E-08      | 15  | 72870547             | ILMN_1679495          | ULK3                | cis                         |       |        |                  |                |
| rs11072518 | SBP/MAP | NA        | SCAMP5;COX5A;RPP25;C15orf17;MPI | 12     | LDproxy(CEU-H3)   | 0.733                   | rs1378942  | Sub adipose (MUTHER)          | 6.30E-08      | 15  | 72864420             | ILMN_1679495          | ULK3                | cis                         |       |        |                  |                |
| rs11072518 | SBP/MAP | NA        | SCAMP5;COX5A;RPP25;C15orf17;MPI | 12     | LDproxy(CEU-Rel2) | 0.733                   | rs4886410  | Sub adipose (MUTHER)          | 7.48E-08      | 15  | 72852697             | ILMN_1679495          | ULK3                | cis                         |       |        |                  |                |
| rs11072518 | SBP/MAP | NA        | SCAMP5;COX5A;RPP25;C15orf17;MPI | 12     | LDproxy(CEU-Rel2) | 0.733                   | rs3784789  | Whole blood (DeepSAGEseq)     | 1.48E-06      | 15  | 75082552_15_75095325 |                       | None:15_75095325    | cis                         |       |        |                  |                |
| rs11072518 | SBP/MAP | NA        | SCAMP5;COX5A;RPP25;C15orf17;MPI | 12     | LDproxy(CEU-Rel2) | 0.733                   | rs4886410  | LCL (MUTHER)                  | 3.79E-06      | 15  | 72852697             | ILMN_1761262          | MPI                 | cis                         |       |        |                  |                |
| rs11072518 | SBP/MAP | NA        | SCAMP5;COX5A;RPP25;C15orf17;MPI | 12     | LDproxy(CEU-Rel2) | 0.733                   | rs1378940  | LCL (MUTHER)                  | 4.06E-06      | 15  | 72870547             | ILMN_1761262          | MPI                 | cis                         |       |        |                  |                |
| rs11072518 | SBP/MAP | NA        | SCAMP5;COX5A;RPP25;C15orf17;MPI | 12     | LDproxy(CEU-Rel2) | 0.733                   | rs1378941  | LCL (MUTHER)                  | 4.16E-06      | 15  | 72867203             | ILMN_1761262          | MPI                 | cis                         |       |        |                  |                |
| rs11072518 | SBP/MAP | NA        | SCAMP5;COX5A;RPP25;C15orf17;MPI | 12     | LDproxy(CEU-Rel2) | 0.733                   | rs3784789  | LCL (MUTHER)                  | 4.43E-06      | 15  | 72869605             | ILMN_1761262          | MPI                 | cis                         |       |        |                  |                |
| rs11072518 | SBP/MAP | NA        | SCAMP5;COX5A;RPP25;C15orf17;MPI | 12     | LDproxy(CEU-H3)   | 0.733                   | rs1378942  | LCL (MUTHER)                  | 4.49E-06      | 15  | 72864420             | ILMN_1761262          | MPI                 | cis                         |       |        |                  |                |
| rs11072518 | SBP/MAP | NA        | SCAMP5;COX5A;RPP25;C15orf17;MPI | 12     | LDproxy(CEU-H3)   | 0.733                   | rs1378942  | Lung                          | 3.02E-05      | 15  | 72864420             | 100132373_TGI_ε_CSK   | CSK                 | cis                         |       |        |                  |                |
| rs11072518 | SBP/MAP | NA        | SCAMP5;COX5A;RPP25;C15orf17;MPI | 12     | LDproxy(CEU-H3)   | 0.733                   | rs1378942  | Blood(Fehrmann et al)         | 2.00E-45;3.2E | 15  | 72864420             | 3170239;4480132       | CSK;ULK3;COX5A      | cis                         |       |        |                  |                |
| rs11072518 | SBP/MAP | NA        | SCAMP5;COX5A;RPP25;C15orf17;MPI | 12     | LDproxy(CEU-1kg)  | 0.719                   | rs12591513 | LCL in asthmatics (Liang 1kg) | 1.92E-22      | 15  | 72889767             | 202472_at             | MPI                 | cis                         |       |        |                  |                |
| rs11072518 | SBP/MAP | NA        | SCAMP5;COX5A;RPP25;C15orf17;MPI | 12     | LDproxy(CEU-Rel2) | 0.701                   | rs4886606  | Whole blood (CHARGE)          | 6.50E-29      | 15  | 72844800             | 4480132               | ULK3                | cis                         | 11.16 | A      | 15               | 72915933       |
| rs11072518 | SBP/MAP | NA        | SCAMP5;COX5A;RPP25;C15orf17;MPI | 12     | LDproxy(CEU-Rel2) | 0.701                   | rs4886606  | Skin (MUTHER)                 | 7.34E-08      | 15  | 72844800             | ILMN_1679495          | ULK3                | cis                         |       |        |                  |                |

| IndexSNP   | Traits  | InRefGene | RefGenes60kb                    | Locus# | Index/LD status         | r <sup>2</sup> to index | eSNPid     | Tissue                              | eSNP P value      | Chr | B36pos   | ArrayID        | Transcript        | type of eQTL (cis or trans) | Beta  | Allele | Probe Chromosome | Probe Position |
|------------|---------|-----------|---------------------------------|--------|-------------------------|-------------------------|------------|-------------------------------------|-------------------|-----|----------|----------------|-------------------|-----------------------------|-------|--------|------------------|----------------|
| rs11072518 | SBP/MAP | NA        | SCAMP5;COX5A;RPP25;C15orf17;MPI | 12     | LDproxy(CEU-Rel): 0.701 |                         | rs4886606  | Subc adipose (MuTHER)               | 8.91E-08          | 15  | 72844800 | ILMN_1679495   | ULK3              | cis                         |       |        |                  |                |
| rs11072518 | SBP/MAP | NA        | SCAMP5;COX5A;RPP25;C15orf17;MPI | 12     | LDproxy(CEU-Rel): 0.701 |                         | rs4886606  | LCL (MuTHER)                        | 6.38E-06          | 15  | 72844800 | ILMN_1761262   | MPI               | cis                         |       |        |                  |                |
| rs1133323  | DBP     | NA        | COX5A;SCAMP2;RPP25;C15orf17;MPI | 13     | IndexSNP                |                         | rs1133323  | Monocytes                           | 8.25E-26          | 15  | 72999278 |                | ULK3              | cis                         |       |        |                  |                |
| rs1133323  | DBP     | NA        | COX5A;SCAMP2;RPP25;C15orf17;MPI | 13     | IndexSNP                |                         | rs1133323  | Whole blood (CHARGE)                | 5.97E-21          | 15  | 72999278 | 4480132        | ULK3              | cis                         | -9.39 | T      | 15               | 72915933       |
| rs1133323  | DBP     | NA        | COX5A;SCAMP2;RPP25;C15orf17;MPI | 13     | IndexSNP                |                         | rs1133323  | LCL (MuTHER)                        | 3.18E-08          | 15  | 72999278 | ILMN_1761262   | MPI               | cis                         |       |        |                  |                |
| rs1133323  | DBP     | NA        | COX5A;SCAMP2;RPP25;C15orf17;MPI | 13     | IndexSNP                |                         | rs1133323  | Skin (MuTHER)                       | 1.30E-05          | 15  | 72999278 | ILMN_1679495   | ULK3              | cis                         |       |        |                  |                |
| rs1133323  | DBP     | NA        | COX5A;SCAMP2;RPP25;C15orf17;MPI | 13     | IndexSNP                |                         | rs1133323  | Subc adipose (MuTHER)               | 2.40E-05          | 15  | 72999278 | ILMN_2364535   | SNUPN             | cis                         |       |        |                  |                |
| rs1133323  | DBP     | NA        | COX5A;SCAMP2;RPP25;C15orf17;MPI | 13     | IndexSNP                |                         | rs1133323  | Bcells (CD19+)                      | 3.86E-05          | 15  | 72999278 | ubt12t1w7_Z_FO | CSK               | cis                         |       |        |                  |                |
| rs1133323  | DBP     | NA        | COX5A;SCAMP2;RPP25;C15orf17;MPI | 13     | LDproxy(CEU-1kg)        | 1                       | rs11638130 | Whole blood (Battle)                | 7.31E-79          | 15  | 75183935 |                | SCAMP2            | cis                         |       |        |                  |                |
| rs1133323  | DBP     | NA        | COX5A;SCAMP2;RPP25;C15orf17;MPI | 13     | LDproxy(CEU-Rel): 1     |                         | rs1133323  | Monocytes                           | 8.85E-27          | 15  | 72999410 |                | ULK3              | cis                         |       |        |                  |                |
| rs1133323  | DBP     | NA        | COX5A;SCAMP2;RPP25;C15orf17;MPI | 13     | LDproxy(CEU-1kg)        | 1                       | rs11857695 | LCL in asthmatics (Liang 1kg)       | 3.41E-21          | 15  | 72952804 | 218143_s_at    | SCAMP2            | cis                         |       |        |                  |                |
| rs1133323  | DBP     | NA        | COX5A;SCAMP2;RPP25;C15orf17;MPI | 13     | LDproxy(CEU-1kg)        | 1                       | rs12911254 | LCL in asthmatics (Liang 1kg)       | 3.41E-21          | 15  | 72953388 | 218143_s_at    | SCAMP2            | cis                         |       |        |                  |                |
| rs1133323  | DBP     | NA        | COX5A;SCAMP2;RPP25;C15orf17;MPI | 13     | LDproxy(CEU-1kg)        | 1                       | rs11638130 | LCL in asthmatics (Liang 1kg)       | 5.92E-21          | 15  | 72970988 | 218143_s_at    | SCAMP2            | cis                         |       |        |                  |                |
| rs1133323  | DBP     | NA        | COX5A;SCAMP2;RPP25;C15orf17;MPI | 13     | LDproxy(CEU-1kg)        | 1                       | rs11633472 | LCL in asthmatics (Liang 1kg)       | 5.99E-21          | 15  | 72971137 | 218143_s_at    | SCAMP2            | cis                         |       |        |                  |                |
| rs1133323  | DBP     | NA        | COX5A;SCAMP2;RPP25;C15orf17;MPI | 13     | LDproxy(CEU-Rel): 1     |                         | rs1133323  | Whole blood (CHARGE)                | 6.01E-21          | 15  | 72999410 | 4480132        | ULK3              | cis                         | -9.39 | G      | 15               | 72915933       |
| rs1133323  | DBP     | NA        | COX5A;SCAMP2;RPP25;C15orf17;MPI | 13     | LDproxy(CEU-Rel): 1     |                         | rs11072513 | Whole blood (CHARGE)                | 6.51E-21          | 15  | 73008021 | 4480132        | ULK3              | cis                         | -9.38 | T      | 15               | 72915933       |
| rs1133323  | DBP     | NA        | COX5A;SCAMP2;RPP25;C15orf17;MPI | 13     | LDproxy(CEU-1kg)        | 1                       | rs11072514 | Whole blood (CHARGE)                | 7.20E-21          | 15  | 73008918 | 4480132        | ULK3              | cis                         | -9.37 | A      | 15               | 72915933       |
| rs1133323  | DBP     | NA        | COX5A;SCAMP2;RPP25;C15orf17;MPI | 13     | LDproxy(CEU-H3)         | 1                       | rs12939935 | LCL in asthmatics (Liang 1kg)       | 2.70E-20          | 15  | 73001842 | 218143_s_at    | SCAMP2            | cis                         |       |        |                  |                |
| rs1133323  | DBP     | NA        | COX5A;SCAMP2;RPP25;C15orf17;MPI | 13     | LDproxy(CEU-Rel): 1     |                         | rs11072513 | LCL in asthmatics (Liang 1kg)       | 4.20E-20          | 15  | 73008021 | 218143_s_at    | SCAMP2            | cis                         |       |        |                  |                |
| rs1133323  | DBP     | NA        | COX5A;SCAMP2;RPP25;C15orf17;MPI | 13     | LDproxy(CEU-1kg)        | 1                       | rs12912839 | LCL in asthmatics (Liang 1kg)       | 1.09E-19          | 15  | 73008298 | 218143_s_at    | SCAMP2            | cis                         |       |        |                  |                |
| rs1133323  | DBP     | NA        | COX5A;SCAMP2;RPP25;C15orf17;MPI | 13     | LDproxy(CEU-1kg)        | 1                       | rs11072514 | LCL in asthmatics (Liang 1kg)       | 1.10E-19          | 15  | 73008918 | 218143_s_at    | SCAMP2            | cis                         |       |        |                  |                |
| rs1133323  | DBP     | NA        | COX5A;SCAMP2;RPP25;C15orf17;MPI | 13     | LDproxy(CEU-1kg)        | 1                       | rs62092167 | LCL in asthmatics (Liang 1kg)       | 2.14E-19          | 15  | 73015403 | 218143_s_at    | SCAMP2            | cis                         |       |        |                  |                |
| rs1133323  | DBP     | NA        | COX5A;SCAMP2;RPP25;C15orf17;MPI | 13     | LDproxy(CEU-1kg)        | 1                       | rs12901190 | LCL in asthmatics (Liang 1kg)       | 4.25E-19          | 15  | 73018505 | 218143_s_at    | SCAMP2            | cis                         |       |        |                  |                |
| rs1133323  | DBP     | NA        | COX5A;SCAMP2;RPP25;C15orf17;MPI | 13     | LDproxy(CEU-Rel): 1     |                         | rs1133322  | Hippocampus (CA1, n=61; Kim et al.) | 5.88E-11          | 15  | 75212357 | 229426         | COX5A             | cis                         | 0.00  |        |                  |                |
| rs1133323  | DBP     | NA        | COX5A;SCAMP2;RPP25;C15orf17;MPI | 13     | LDproxy(CEU-Rel): 1     |                         | rs1133322  | LCL (MuTHER)                        | 3.12E-09          | 15  | 72999410 | ILMN_1761262   | MPI               | cis                         |       |        |                  |                |
| rs1133323  | DBP     | NA        | COX5A;SCAMP2;RPP25;C15orf17;MPI | 13     | LDproxy(CEU-Rel): 1     |                         | rs11072513 | LCL (MuTHER)                        | 2.97E-08          | 15  | 73008021 | ILMN_1761262   | MPI               | cis                         |       |        |                  |                |
| rs1133323  | DBP     | NA        | COX5A;SCAMP2;RPP25;C15orf17;MPI | 13     | LDproxy(CEU-1kg)        | 1                       | rs11072514 | LCL (MuTHER)                        | 3.03E-08          | 15  | 73008918 | ILMN_1761262   | MPI               | cis                         |       |        |                  |                |
| rs1133323  | DBP     | NA        | COX5A;SCAMP2;RPP25;C15orf17;MPI | 13     | LDproxy(CEU-1kg)        | 1                       | rs11072514 | Skin (MuTHER)                       | 1.37E-05          | 15  | 73008918 | ILMN_1679495   | ULK3              | cis                         |       |        |                  |                |
| rs1133323  | DBP     | NA        | COX5A;SCAMP2;RPP25;C15orf17;MPI | 13     | LDproxy(CEU-Rel): 1     |                         | rs11072513 | Skin (MuTHER)                       | 1.39E-05          | 15  | 73008021 | ILMN_1679495   | ULK3              | cis                         |       |        |                  |                |
| rs1133323  | DBP     | NA        | COX5A;SCAMP2;RPP25;C15orf17;MPI | 13     | LDproxy(CEU-Rel): 1     |                         | rs11072513 | Subc adipose (MuTHER)               | 1.98E-05          | 15  | 73008021 | ILMN_2364535   | SNUPN             | cis                         |       |        |                  |                |
| rs1133323  | DBP     | NA        | COX5A;SCAMP2;RPP25;C15orf17;MPI | 13     | LDproxy(CEU-1kg)        | 1                       | rs11072514 | Subc adipose (MuTHER)               | 2.04E-05          | 15  | 73008918 | ILMN_2364535   | SNUPN             | cis                         |       |        |                  |                |
| rs1133323  | DBP     | NA        | COX5A;SCAMP2;RPP25;C15orf17;MPI | 13     | LDproxy(CEU-Rel): 1     |                         | rs1133322  | Subc adipose (MuTHER)               | 2.19E-05          | 15  | 72999410 | ILMN_1679495   | ULK3              | cis                         |       |        |                  |                |
| rs1133323  | DBP     | NA        | COX5A;SCAMP2;RPP25;C15orf17;MPI | 13     | LDproxy(CEU-Rel): 1     |                         | rs1133322  | Skin (MuTHER)                       | 3.02E-05          | 15  | 72999410 | ILMN_1679495   | ULK3              | cis                         |       |        |                  |                |
| rs1133323  | DBP     | NA        | COX5A;SCAMP2;RPP25;C15orf17;MPI | 13     | LDproxy(CEU-Rel): 1     |                         | rs1133322  | Bcells (CD19+)                      | 3.21E-05          | 15  | 72999410 | ubt12t1w7_Z_FO | CSK               | cis                         |       |        |                  |                |
| rs1133323  | DBP     | NA        | COX5A;SCAMP2;RPP25;C15orf17;MPI | 13     | LDproxy(CEU-1kg)        | 1                       | rs11633472 | Bcells (CD19+)                      | 3.86E-05          | 15  | 72971137 | ubt12t1w7_Z_FO | CSK               | cis                         |       |        |                  |                |
| rs1133323  | DBP     | NA        | COX5A;SCAMP2;RPP25;C15orf17;MPI | 13     | LDproxy(CEU-1kg)        | 1                       | rs11638130 | Bcells (CD19+)                      | 3.86E-05          | 15  | 72970988 | ubt12t1w7_Z_FO | CSK               | cis                         |       |        |                  |                |
| rs1133323  | DBP     | NA        | COX5A;SCAMP2;RPP25;C15orf17;MPI | 13     | LDproxy(CEU-Rel): 1     |                         | rs1133322  | Monocytes (CD14+)                   | 0.0001945         | 15  | 72999410 | r_tdn3VF1v3q   | ULK3              | cis                         |       |        |                  |                |
| rs1133323  | DBP     | NA        | COX5A;SCAMP2;RPP25;C15orf17;MPI | 13     | LDproxy(CEU-H3)         | 0.982                   | rs11856413 | LCL in asthmatics (Liang 1kg)       | 1.02E-20          | 15  | 72986945 | 218143_s_at    | SCAMP2            | cis                         |       |        |                  |                |
| rs1133323  | DBP     | NA        | COX5A;SCAMP2;RPP25;C15orf17;MPI | 13     | LDproxy(CEU-H3)         | 0.982                   | rs11856413 | Whole blood (CHARGE)                | 3.32E-20          | 15  | 72986945 | 4480132        | ULK3              | cis                         | -9.21 | G      | 15               | 72915933       |
| rs1133323  | DBP     | NA        | COX5A;SCAMP2;RPP25;C15orf17;MPI | 13     | LDproxy(CEU-H3)         | 0.982                   | rs11856413 | Liver (Greenawalt)                  | 1.34E-18          | 15  | 72986945 | 10023814330    | MPI               | cis                         |       |        |                  |                |
| rs1133323  | DBP     | NA        | COX5A;SCAMP2;RPP25;C15orf17;MPI | 13     | LDproxy(CEU-H3)         | 0.982                   | rs11856413 | LCL (MuTHER)                        | 3.91E-08          | 15  | 72986945 | ILMN_1761262   | MPI               | cis                         |       |        |                  |                |
| rs1133323  | DBP     | NA        | COX5A;SCAMP2;RPP25;C15orf17;MPI | 13     | LDproxy(CEU-H3)         | 0.982                   | rs11856413 | Lymph                               | 4.27E-06          | 15  | 72986945 | GI_4505234-5   | MPI               | cis                         |       |        |                  |                |
| rs1133323  | DBP     | NA        | COX5A;SCAMP2;RPP25;C15orf17;MPI | 13     | LDproxy(CEU-H3)         | 0.982                   | rs11856413 | Skin (MuTHER)                       | 1.33E-05          | 15  | 72986945 | ILMN_1679495   | ULK3              | cis                         |       |        |                  |                |
| rs1133323  | DBP     | NA        | COX5A;SCAMP2;RPP25;C15orf17;MPI | 13     | LDproxy(CEU-H3)         | 0.982                   | rs11856413 | Prefrontal cortex (all samples)     | 1.3997E-05        | 15  | 72986945 | 10026392220    | SCAMP2            | cis                         |       |        |                  |                |
| rs1133323  | DBP     | NA        | COX5A;SCAMP2;RPP25;C15orf17;MPI | 13     | LDproxy(CEU-H3)         | 0.982                   | rs11856413 | Subc adipose (MuTHER)               | 3.12E-05          | 15  | 72986945 | ILMN_2364535   | SNUPN             | cis                         |       |        |                  |                |
| rs1133323  | DBP     | NA        | COX5A;SCAMP2;RPP25;C15orf17;MPI | 13     | LDproxy(CEU-H3)         | 0.982                   | rs11856413 | Bcells (CD19+)                      | 3.86E-05          | 15  | 72986945 | ubt12t1w7_Z_FO | CSK               | cis                         |       |        |                  |                |
| rs1133323  | DBP     | NA        | COX5A;SCAMP2;RPP25;C15orf17;MPI | 13     | LDproxy(CEU-H3)         | 0.982                   | rs11856413 | Induced sputum (COPD cases)         | 0.00015722        | 15  | 72986945 | 224805_s_at    | C15orf17          | cis                         |       |        |                  |                |
| rs1133323  | DBP     | NA        | COX5A;SCAMP2;RPP25;C15orf17;MPI | 13     | LDproxy(CEU-H3)         | 0.982                   | rs11856413 | Blood(Fehrmann et al)               | 2.20E-21;2.20E-21 | 15  | 72986945 | 3170239;503414 | CSK;SCAMP2;ULK3;C | cis                         |       |        |                  |                |
| rs1133323  | DBP     | NA        | COX5A;SCAMP2;RPP25;C15orf17;MPI | 13     | LDproxy(CEU-Rel): 0.967 |                         | rs1130741  | Whole blood (Battle)                | 4.09E-124         | 15  | 75189930 |                | MPI               | cis                         |       |        |                  |                |
| rs1133323  | DBP     | NA        | COX5A;SCAMP2;RPP25;C15orf17;MPI | 13     | LDproxy(CEU-Rel): 0.967 |                         | rs7495739  | Monocytes                           | 3.25E-29          | 15  | 72972723 |                | ULK3              | cis                         |       |        |                  |                |
| rs1133323  | DBP     | NA        | COX5A;SCAMP2;RPP25;C15orf17;MPI | 13     | LDproxy(CEU-Rel): 0.967 |                         | rs7495739  | LCL in asthmatics (Liang 1kg)       | 5.96E-29          | 15  | 72972723 | 202472_at      | MPI               | cis                         |       |        |                  |                |
| rs1133323  | DBP     | NA        | COX5A;SCAMP2;RPP25;C15orf17;MPI | 13     | LDproxy(CEU-Rel): 0.967 |                         | rs1130741  | LCL in asthmatics (Liang 1kg)       | 1.45E-28          | 15  | 72976983 | 202472_at      | MPI               | cis                         |       |        |                  |                |
| rs1133323  | DBP     | NA        | COX5A;SCAMP2;RPP25;C15orf17;MPI | 13     | LDproxy(CEU-Rel): 0.967 |                         | rs11072512 | LCL in asthmatics (Liang 1kg)       | 3.40E-28          | 15  | 72991079 | 202472_at      | MPI               | cis                         |       |        |                  |                |
| rs1133323  | DBP     | NA        | COX5A;SCAMP2;RPP25;C15orf17;MPI | 13     | LDproxy(CEU-Rel): 0.967 |                         | rs4886636  | LCL in asthmatics (Liang 1kg)       | 3.40E-28          | 15  | 72983229 | 202472_at      | MPI               | cis                         |       |        |                  |                |
| rs1133323  | DBP     | NA        | COX5A;SCAMP2;RPP25;C15orf17;MPI | 13     | LDproxy(CEU-Rel): 0.967 |                         | rs1127796  | Monocytes                           | 6.08E-27          | 15  | 72980057 |                | ULK3              | cis                         |       |        |                  |                |
| rs1133323  | DBP     | NA        | COX5A;SCAMP2;RPP25;C15orf17;MPI | 13     | LDproxy(CEU-Rel): 0.967 |                         | rs4886636  | Whole blood (CHARGE)                | 1.49E-22          | 15  | 72983229 | 4480132        | ULK3              | cis                         | -9.77 | A      | 15               | 72915933       |
| rs1133323  | DBP     | NA        | COX5A;SCAMP2;RPP25;C15orf17;MPI | 13     | LDproxy(CEU-Rel): 0.967 |                         | rs1130741  | Whole blood (CHARGE)                | 5.14E-22          | 15  | 72976983 | 4480132        | ULK3              | cis                         | -9.65 | G      | 15               | 72915933       |
| rs1133323  | DBP     | NA        | COX5A;SCAMP2;RPP25;C15orf17;MPI | 13     | LDproxy(CEU-Rel): 0.967 |                         | rs7495739  | Whole blood (CHARGE)                | 5.40E-22          | 15  | 72972723 | 4480132        | ULK3              | cis                         | -9.64 | G      | 15               | 72915933       |
| rs11333    |         |           |                                 |        |                         |                         |            |                                     |                   |     |          |                |                   |                             |       |        |                  |                |

| IndexSNP  | Traits | InRefGene | RefGenes60kb                    | Locus# | Index/LD status         | r <sup>2</sup> to index | eSNPid                            | Tissue                        | eSNP P value     | Chr | B36pos   | ArrayID                           | Transcript | type of eQTL (cis or trans) | Beta  | Allele | Probe Chromosome | Probe Position |
|-----------|--------|-----------|---------------------------------|--------|-------------------------|-------------------------|-----------------------------------|-------------------------------|------------------|-----|----------|-----------------------------------|------------|-----------------------------|-------|--------|------------------|----------------|
| rs1133323 | DBP    | NA        | COX5A;SCAMP2;RPP25;C15orf17;MPI | 13     | LDproxy(CEU-Rel): 0.967 | rs1127796               | Whole blood (CHARGE)              |                               | 1.00E-21         | 15  | 72980057 | 4480132                           | ULK3       | cis                         | -9.58 | C      | 15               | 72915933       |
| rs1133323 | DBP    | NA        | COX5A;SCAMP2;RPP25;C15orf17;MPI | 13     | LDproxy(CEU-Rel): 0.967 | rs11072511              | Whole blood (CHARGE)              |                               | 1.61E-21         | 15  | 72946486 | 4480132                           | ULK3       | cis                         | -9.53 | G      | 15               | 72915933       |
| rs1133323 | DBP    | NA        | COX5A;SCAMP2;RPP25;C15orf17;MPI | 13     | LDproxy(CEU-Rel): 0.967 | rs7497393               | LCL in asthmatics (Liang 1kg)     |                               | 3.92E-21         | 15  | 72999278 | 218143_s_at                       | SCAMP2     | cis                         |       |        |                  |                |
| rs1133323 | DBP    | NA        | COX5A;SCAMP2;RPP25;C15orf17;MPI | 13     | LDproxy(CEU-Rel): 0.967 | rs11072512              | Whole blood (CHARGE)              |                               | 7.79E-21         | 15  | 72991079 | 4480132                           | ULK3       | cis                         | -9.36 | T      | 15               | 72915933       |
| rs1133323 | DBP    | NA        | COX5A;SCAMP2;RPP25;C15orf17;MPI | 13     | LDproxy(CEU-Rel): 0.967 | rs11072511              | LCL in asthmatics (Liang 1kg)     |                               | 5.64E-20         | 15  | 72946486 | 218143_s_at                       | SCAMP2     | cis                         |       |        |                  |                |
| rs1133323 | DBP    | NA        | COX5A;SCAMP2;RPP25;C15orf17;MPI | 13     | LDproxy(CEU-Rel): 0.967 | rs4886636               | SubCutAdipose(Greenawalt)         |                               | 7.68E-11         | 15  | 72983229 | 10023814330                       | MPI        | cis                         |       |        |                  |                |
| rs1133323 | DBP    | NA        | COX5A;SCAMP2;RPP25;C15orf17;MPI | 13     | LDproxy(CEU-Rel): 0.967 | rs4886636               | LCL (MuTHER)                      |                               | 3.00E-09         | 15  | 72983229 | ILMN_1761262                      | MPI        | cis                         |       |        |                  |                |
| rs1133323 | DBP    | NA        | COX5A;SCAMP2;RPP25;C15orf17;MPI | 13     | LDproxy(CEU-Rel): 0.967 | rs11072512              | LCL (MuTHER)                      |                               | 3.10E-09         | 15  | 72991079 | ILMN_1761262                      | MPI        | cis                         |       |        |                  |                |
| rs1133323 | DBP    | NA        | COX5A;SCAMP2;RPP25;C15orf17;MPI | 13     | LDproxy(CEU-Rel): 0.967 | rs1127796               | LCL (MuTHER)                      |                               | 4.61E-09         | 15  | 72980057 | ILMN_1761262                      | MPI        | cis                         |       |        |                  |                |
| rs1133323 | DBP    | NA        | COX5A;SCAMP2;RPP25;C15orf17;MPI | 13     | LDproxy(CEU-Rel): 0.967 | rs1130741               | LCL (MuTHER)                      |                               | 4.89E-09         | 15  | 72976983 | ILMN_1761262                      | MPI        | cis                         |       |        |                  |                |
| rs1133323 | DBP    | NA        | COX5A;SCAMP2;RPP25;C15orf17;MPI | 13     | LDproxy(CEU-Rel): 0.967 | rs7495739               | LCL (MuTHER)                      |                               | 5.54E-09         | 15  | 72972723 | ILMN_1761262                      | MPI        | cis                         |       |        |                  |                |
| rs1133323 | DBP    | NA        | COX5A;SCAMP2;RPP25;C15orf17;MPI | 13     | LDproxy(CEU-Rel): 0.967 | rs11072511              | LCL (MuTHER)                      |                               | 6.47E-09         | 15  | 72946486 | ILMN_1761262                      | MPI        | cis                         |       |        |                  |                |
| rs1133323 | DBP    | NA        | COX5A;SCAMP2;RPP25;C15orf17;MPI | 13     | LDproxy(CEU-Rel): 0.967 | rs7497393               | LCL (MuTHER)                      |                               | 8.74E-08         | 15  | 72962510 | ILMN_1761262                      | MPI        | cis                         |       |        |                  |                |
| rs1133323 | DBP    | NA        | COX5A;SCAMP2;RPP25;C15orf17;MPI | 13     | LDproxy(CEU-Rel): 0.967 | rs7495739               | RNAseq(HapMapLCL)+DeepSage(blood) |                               | 2.76E-07         | 15  | 75185670 | ENST0000037969                    | MPI        | cis                         |       |        |                  |                |
| rs1133323 | DBP    | NA        | COX5A;SCAMP2;RPP25;C15orf17;MPI | 13     | LDproxy(CEU-Rel): 0.967 | rs7497393               | Subc adipose (MuTHER)             |                               | 1.49E-05         | 15  | 72962510 | ILMN_2364535                      | SNUPN      | cis                         |       |        |                  |                |
| rs1133323 | DBP    | NA        | COX5A;SCAMP2;RPP25;C15orf17;MPI | 13     | LDproxy(CEU-Rel): 0.967 | rs11072511              | Subc adipose (MuTHER)             |                               | 1.53E-05         | 15  | 72946486 | ILMN_1679495                      | ULK3       | cis                         |       |        |                  |                |
| rs1133323 | DBP    | NA        | COX5A;SCAMP2;RPP25;C15orf17;MPI | 13     | LDproxy(CEU-Rel): 0.967 | rs4886636               | Subc adipose (MuTHER)             |                               | 1.94E-05         | 15  | 72983229 | ILMN_1679495                      | ULK3       | cis                         |       |        |                  |                |
| rs1133323 | DBP    | NA        | COX5A;SCAMP2;RPP25;C15orf17;MPI | 13     | LDproxy(CEU-Rel): 0.967 | rs7495739               | Subc adipose (MuTHER)             |                               | 2.20E-05         | 15  | 72972723 | ILMN_1679495                      | ULK3       | cis                         |       |        |                  |                |
| rs1133323 | DBP    | NA        | COX5A;SCAMP2;RPP25;C15orf17;MPI | 13     | LDproxy(CEU-Rel): 0.967 | rs1130741               | Subc adipose (MuTHER)             |                               | 2.25E-05         | 15  | 72976983 | ILMN_1679495                      | ULK3       | cis                         |       |        |                  |                |
| rs1133323 | DBP    | NA        | COX5A;SCAMP2;RPP25;C15orf17;MPI | 13     | LDproxy(CEU-Rel): 0.967 | rs7497393               | Skin (MuTHER)                     |                               | 2.44E-05         | 15  | 72962510 | ILMN_1679495                      | ULK3       | cis                         |       |        |                  |                |
| rs1133323 | DBP    | NA        | COX5A;SCAMP2;RPP25;C15orf17;MPI | 13     | LDproxy(CEU-Rel): 0.967 | rs1127796               | Subc adipose (MuTHER)             |                               | 2.49E-05         | 15  | 72980057 | ILMN_1679495                      | ULK3       | cis                         |       |        |                  |                |
| rs1133323 | DBP    | NA        | COX5A;SCAMP2;RPP25;C15orf17;MPI | 13     | LDproxy(CEU-Rel): 0.967 | rs4886636               | Induced sputum (COPD cases)       |                               | 2.56E-05         | 15  | 72983229 | 224805_s_at                       | C15orf17   | cis                         |       |        |                  |                |
| rs1133323 | DBP    | NA        | COX5A;SCAMP2;RPP25;C15orf17;MPI | 13     | LDproxy(CEU-Rel): 0.967 | rs11072512              | Subc adipose (MuTHER)             |                               | 2.61E-05         | 15  | 72991079 | ILMN_1679495                      | ULK3       | cis                         |       |        |                  |                |
| rs1133323 | DBP    | NA        | COX5A;SCAMP2;RPP25;C15orf17;MPI | 13     | LDproxy(CEU-Rel): 0.967 | rs11072512              | Skin (MuTHER)                     |                               | 3.01E-05         | 15  | 72991079 | ILMN_1679495                      | ULK3       | cis                         |       |        |                  |                |
| rs1133323 | DBP    | NA        | COX5A;SCAMP2;RPP25;C15orf17;MPI | 13     | LDproxy(CEU-Rel): 0.967 | rs11072512              | Bcells (CD19+)                    |                               | 3.21E-05         | 15  | 72991079 | ubt12t1W7_Z_FO_CSK                | cis        |                             |       |        |                  |                |
| rs1133323 | DBP    | NA        | COX5A;SCAMP2;RPP25;C15orf17;MPI | 13     | LDproxy(CEU-Rel): 0.967 | rs1127796               | Bcells (CD19+)                    |                               | 3.21E-05         | 15  | 72980057 | ubt12t1W7_Z_FO_CSK                | cis        |                             |       |        |                  |                |
| rs1133323 | DBP    | NA        | COX5A;SCAMP2;RPP25;C15orf17;MPI | 13     | LDproxy(CEU-Rel): 0.967 | rs4886636               | Bcells (CD19+)                    |                               | 3.35E-05         | 15  | 72983229 | ubt12t1W7_Z_FO_CSK                | cis        |                             |       |        |                  |                |
| rs1133323 | DBP    | NA        | COX5A;SCAMP2;RPP25;C15orf17;MPI | 13     | LDproxy(CEU-Rel): 0.967 | rs1130741               | Bcells (CD19+)                    |                               | 4.67E-05         | 15  | 72976983 | ubt12t1W7_Z_FO_CSK                | cis        |                             |       |        |                  |                |
| rs1133323 | DBP    | NA        | COX5A;SCAMP2;RPP25;C15orf17;MPI | 13     | LDproxy(CEU-Rel): 0.967 | rs4886636               | Monocytes (CD14+)                 |                               | 0.000135         | 15  | 72983229 | r_tdn3Vf1vV3q\ULK3                | cis        |                             |       |        |                  |                |
| rs1133323 | DBP    | NA        | COX5A;SCAMP2;RPP25;C15orf17;MPI | 13     | LDproxy(CEU-Rel): 0.967 | rs11072511              | Bcells (CD19+)                    |                               | 0.0001942        | 15  | 72946486 | ubt12t1W7_Z_FO_CSK                | cis        |                             |       |        |                  |                |
| rs1133323 | DBP    | NA        | COX5A;SCAMP2;RPP25;C15orf17;MPI | 13     | LDproxy(CEU-Rel): 0.967 | rs11072512              | Monocytes (CD14+)                 |                               | 0.0001945        | 15  | 72991079 | r_tdn3Vf1vV3q\ULK3                | cis        |                             |       |        |                  |                |
| rs1133323 | DBP    | NA        | COX5A;SCAMP2;RPP25;C15orf17;MPI | 13     | LDproxy(CEU-Rel): 0.967 | rs1127796               | Monocytes (CD14+)                 |                               | 0.0001945        | 15  | 72980057 | r_tdn3Vf1vV3q\ULK3                | cis        |                             |       |        |                  |                |
| rs1133323 | DBP    | NA        | COX5A;SCAMP2;RPP25;C15orf17;MPI | 13     | LDproxy(CEU-Rel): 0.967 | rs4886636               | Visual cortex (all samples)       |                               | 2.80E-04         | 15  | 72983229 | 10023814330                       | MPI        | cis                         |       |        |                  |                |
| rs1133323 | DBP    | NA        | COX5A;SCAMP2;RPP25;C15orf17;MPI | 13     | LDproxy(CEU-Rel): 0.967 | rs1130741               | Monocytes (CD14+)                 |                               | 0.0003045        | 15  | 72976983 | r_tdn3Vf1vV3q\ULK3                | cis        |                             |       |        |                  |                |
| rs1133323 | DBP    | NA        | COX5A;SCAMP2;RPP25;C15orf17;MPI | 13     | LDproxy(CEU-Rel): 0.967 | rs4886636               | Liver(UChicago)                   |                               | 0.000119825      | 15  | 72983229 | A_23_P60579;A_MPI;SCAMP2          | cis        |                             |       |        |                  |                |
| rs1133323 | DBP    | NA        | COX5A;SCAMP2;RPP25;C15orf17;MPI | 13     | LDproxy(CEU-Rel): 0.967 | rs4886636               | Blood(Fehrmann et al)             |                               | 1.60E-19;1.1E-11 | 15  | 72983229 | 3170239;50341;4_CSK;SCAMP2;ULK3;C | cis        |                             |       |        |                  |                |
| rs1133323 | DBP    | NA        | COX5A;SCAMP2;RPP25;C15orf17;MPI | 13     | LDproxy(CEU-1kg)        | 0.966                   | rs12902515                        | LCL in asthmatics (Liang 1kg) | 4.40E-20         | 15  | 72948051 | 218143_s_at                       | SCAMP2     | cis                         |       |        |                  |                |
| rs1133323 | DBP    | NA        | COX5A;SCAMP2;RPP25;C15orf17;MPI | 13     | LDproxy(CEU-1kg)        | 0.966                   | rs2415251                         | Whole blood (CHARGE)          | 1.49E-19         | 15  | 73029208 | 4480132                           | ULK3       | cis                         | -9.05 | C      | 15               | 72915933       |
| rs1133323 | DBP    | NA        | COX5A;SCAMP2;RPP25;C15orf17;MPI | 13     | LDproxy(CEU-1kg)        | 0.966                   | rs4886636                         | LCL in asthmatics (Liang 1kg) | 2.23E-19         | 15  | 73015708 | 218143_s_at                       | SCAMP2     | cis                         |       |        |                  |                |
| rs1133323 | DBP    | NA        | COX5A;SCAMP2;RPP25;C15orf17;MPI | 13     | LDproxy(CEU-1kg)        | 0.966                   | rs11639413                        | LCL in asthmatics (Liang 1kg) | 2.55E-19         | 15  | 73030347 | 218143_s_at                       | SCAMP2     | cis                         |       |        |                  |                |
| rs1133323 | DBP    | NA        | COX5A;SCAMP2;RPP25;C15orf17;MPI | 13     | LDproxy(CEU-1kg)        | 0.966                   | rs2415251                         | LCL in asthmatics (Liang 1kg) | 2.58E-19         | 15  | 73029208 | 218143_s_at                       | SCAMP2     | cis                         |       |        |                  |                |
| rs1133323 | DBP    | NA        | COX5A;SCAMP2;RPP25;C15orf17;MPI | 13     | LDproxy(CEU-1kg)        | 0.966                   | rs2415251                         | omental                       | 3.08E-19         | 15  | 73029208 | 10025911367                       | RPP25      | cis                         |       |        |                  |                |
| rs1133323 | DBP    | NA        | COX5A;SCAMP2;RPP25;C15orf17;MPI | 13     | LDproxy(CEU-1kg)        | 0.966                   | rs2415249                         | LCL in asthmatics (Liang 1kg) | 4.75E-19         | 15  | 73029093 | 218143_s_at                       | SCAMP2     | cis                         |       |        |                  |                |
| rs1133323 | DBP    | NA        | COX5A;SCAMP2;RPP25;C15orf17;MPI | 13     | LDproxy(CEU-1kg)        | 0.966                   | rs2415251                         | LCL (MuTHER)                  | 4.19E-08         | 15  | 73029208 | ILMN_1761262                      | MPI        | cis                         |       |        |                  |                |
| rs1133323 | DBP    | NA        | COX5A;SCAMP2;RPP25;C15orf17;MPI | 13     | LDproxy(CEU-1kg)        | 0.966                   | rs2415251                         | Subc adipose (MuTHER)         | 2.09E-05         | 15  | 73029208 | ILMN_2364535                      | SNUPN      | cis                         |       |        |                  |                |
| rs1133323 | DBP    | NA        | COX5A;SCAMP2;RPP25;C15orf17;MPI | 13     | LDproxy(CEU-1kg)        | 0.966                   | rs2415251                         | Skin (MuTHER)                 | 2.46E-05         | 15  | 73029208 | ILMN_1679495                      | ULK3       | cis                         |       |        |                  |                |
| rs1133323 | DBP    | NA        | COX5A;SCAMP2;RPP25;C15orf17;MPI | 13     | LDproxy(CEU-1kg)        | 0.966                   | rs2415251                         | Bcells (CD19+)                | 3.17E-05         | 15  | 73029208 | ubt12t1W7_Z_FO_CSK                | cis        |                             |       |        |                  |                |
| rs1133323 | DBP    | NA        | COX5A;SCAMP2;RPP25;C15orf17;MPI | 13     | LDproxy(CEU-H3)         | 0.965                   | rs11854704                        | LCL in asthmatics (Liang 1kg) | 4.96E-28         | 15  | 73008068 | 202472_at                         | MPI        | cis                         |       |        |                  |                |
| rs1133323 | DBP    | NA        | COX5A;SCAMP2;RPP25;C15orf17;MPI | 13     | LDproxy(CEU-H3)         | 0.965                   | rs11630918                        | Whole blood (CHARGE)          | 1.26E-22         | 15  | 72942949 | 4480132                           | ULK3       | cis                         | -9.79 | T      | 15               | 72915933       |
| rs1133323 | DBP    | NA        | COX5A;SCAMP2;RPP25;C15orf17;MPI | 13     | LDproxy(CEU-H3)         | 0.965                   | rs11630918                        | LCL in asthmatics (Liang 1kg) | 1.94E-20         | 15  | 72942949 | 218143_s_at                       | SCAMP2     | cis                         |       |        |                  |                |
| rs1133323 | DBP    | NA        | COX5A;SCAMP2;RPP25;C15orf17;MPI | 13     | LDproxy(CEU-H3)         | 0.965                   | rs11630918                        | LCL (MuTHER)                  | 6.46E-08         | 15  | 72942949 | ILMN_1761262                      | MPI        | cis                         |       |        |                  |                |
| rs1133323 | DBP    | NA        | COX5A;SCAMP2;RPP25;C15orf17;MPI | 13     | LDproxy(CEU-H3)         | 0.965                   | rs11630918                        | Lung                          | 2.86E-06         | 15  | 72942949 | 100161886_TGI_ε                   | SCAMP2     | cis                         |       |        |                  |                |
| rs1133323 | DBP    | NA        | COX5A;SCAMP2;RPP25;C15orf17;MPI | 13     | LDproxy(CEU-H3)         | 0.965                   | rs11630918                        | Skin (MuTHER)                 | 4.23E-06         | 15  | 72942949 | ILMN_1679495                      | ULK3       | cis                         |       |        |                  |                |
| rs1133323 | DBP    | NA        | COX5A;SCAMP2;RPP25;C15orf17;MPI | 13     | LDproxy(CEU-H3)         | 0.965                   | rs11630918                        | Subc adipose (MuTHER)         | 3.77E-05         | 15  | 72942949 | ILMN_1679495                      | ULK3       | cis                         |       |        |                  |                |
| rs1133323 | DBP    | NA        | COX5A;SCAMP2;RPP25;C15orf17;MPI | 13     | LDproxy(CEU-H3)         | 0.965                   | rs11630918                        | Bcells (CD19+)                | 5.10E-05         | 15  | 72942949 | ubt12t1W7_Z_FO_CSK                | cis        |                             |       |        |                  |                |
| rs1133323 | DBP    | NA        | COX5A;SCAMP2;RPP25;C15orf17;MPI | 13     | LDproxy(CEU-1kg)        | 0.932                   | rs12913293                        | LCL in asthmatics (Liang 1kg) | 5.44E-29         | 15  | 72971511 | 202472_at                         | MPI        | cis                         |       |        |                  |                |
| rs1133323 | DBP    | NA        | COX5A;SCAMP2;RPP25;C15orf17;MPI | 13     | LDproxy(CEU-1kg)        | 0.932                   | rs8025447                         | LCL in asthmatics (Liang 1kg) | 1.59E-28         | 15  | 72979275 | 202472_at                         | MPI        | cis                         |       |        |                  |                |
| rs1133323 | DBP    | NA        | COX5A;SCAMP2;RPP25;C15orf17;MPI | 13     | LDproxy(CEU-1kg)        | 0.932                   | rs12907898                        | LCL in asthmatics (Liang 1kg) | 3.26E-28         | 15  | 72994925 | 202472_at                         | MPI        | cis                         |       |        |                  |                |
| rs1133323 | DBP    | NA        | COX5A;SCAMP2;RPP25;C15orf17;MPI | 13     | LDproxy(CEU-1kg)        | 0.932                   | rs12904897                        | LCL in asthmatics (Liang 1kg) | 3.85E-28         | 15  | 73004739 | 202472_at                         | MPI        | cis                         |       |        |                  |                |



| IndexSNP  | Traits     | InRefGene | RefGenes60kb                    | Locus# | Index/LD status   | r <sup>2</sup> to index | eSNPid     | Tissue                          | eSNP P value  | Chr | B36pos   | ArrayID         | Transcript        | type of eQTL (cis or trans) | Beta   | Allele | Probe Chromosome | Probe Position |
|-----------|------------|-----------|---------------------------------|--------|-------------------|-------------------------|------------|---------------------------------|---------------|-----|----------|-----------------|-------------------|-----------------------------|--------|--------|------------------|----------------|
| rs1133323 | DBP        | NA        | COX5A;SCAMP2;RPP25;C15orf17;MPI | 13     | LDproxy(CEU-1kg)  | 0.932                   | rs59945415 | LCL in asthmatics (Liang 1kg)   | 8.04E-28      | 15  | 73015480 | 202472_at       | MPI               | cis                         |        |        |                  |                |
| rs1133323 | DBP        | NA        | COX5A;SCAMP2;RPP25;C15orf17;MPI | 13     | LDproxy(CEU-H3)   | 0.931                   | rs12487    | Monocytes                       | 5.36E-26      | 15  | 72923747 |                 | ULK3              | cis                         |        |        |                  |                |
| rs1133323 | DBP        | NA        | COX5A;SCAMP2;RPP25;C15orf17;MPI | 13     | LDproxy(CEU-H3)   | 0.931                   | rs12487    | Whole blood (CHARGE)            | 3.69E-24      | 15  | 72923747 | 4480132         | ULK3              | cis                         | -10.14 | C      | 15               | 72915933       |
| rs1133323 | DBP        | NA        | COX5A;SCAMP2;RPP25;C15orf17;MPI | 13     | LDproxy(CEU-H3)   | 0.931                   | rs12487    | LCL in asthmatics (Liang 1kg)   | 9.19E-21      | 15  | 72923747 | 218143_s_at     | SCAMP2            | cis                         |        |        |                  |                |
| rs1133323 | DBP        | NA        | COX5A;SCAMP2;RPP25;C15orf17;MPI | 13     | LDproxy(CEU-H3)   | 0.931                   | rs12487    | LCL (MuTHER)                    | 2.37E-07      | 15  | 72923747 | ILMN_1761262    | MPI               | cis                         |        |        |                  |                |
| rs1133323 | DBP        | NA        | COX5A;SCAMP2;RPP25;C15orf17;MPI | 13     | LDproxy(CEU-H3)   | 0.931                   | rs12487    | Skin (MuTHER)                   | 3.95E-06      | 15  | 72923747 | ILMN_1679495    | ULK3              | cis                         |        |        |                  |                |
| rs1133323 | DBP        | NA        | COX5A;SCAMP2;RPP25;C15orf17;MPI | 13     | LDproxy(CEU-H3)   | 0.931                   | rs12487    | Subc adipose (MuTHER)           | 4.58E-05      | 15  | 72923747 | ILMN_1695271    | RPP25             | cis                         |        |        |                  |                |
| rs1133323 | DBP        | NA        | COX5A;SCAMP2;RPP25;C15orf17;MPI | 13     | LDproxy(CEU-1kg)  | 0.9                     | rs4480762  | LCL in asthmatics (Liang 1kg)   | 9.19E-21      | 15  | 72926479 | 218143_s_at     | SCAMP2            | cis                         |        |        |                  |                |
| rs1133323 | DBP        | NA        | COX5A;SCAMP2;RPP25;C15orf17;MPI | 13     | LDproxy(CEU-Rel2) | 0.873                   | rs6495122  | Whole blood (CHARGE)            | 3.44E-23      | 15  | 72912698 | 4480132         | ULK3              | cis                         | -9.92  | C      | 15               | 72915933       |
| rs1133323 | DBP        | NA        | COX5A;SCAMP2;RPP25;C15orf17;MPI | 13     | LDproxy(CEU-Rel2) | 0.873                   | rs6495122  | LCL in asthmatics (Liang 1kg)   | 4.34E-20      | 15  | 72912698 | 218143_s_at     | SCAMP2            | cis                         |        |        |                  |                |
| rs1133323 | DBP        | NA        | COX5A;SCAMP2;RPP25;C15orf17;MPI | 13     | LDproxy(CEU-Rel2) | 0.873                   | rs6495122  | Cerebellum (Alzheimer's)        | 7.49E-10      | 15  | 72912698 | 10025927424     | ULK3              | cis                         |        |        |                  |                |
| rs1133323 | DBP        | NA        | COX5A;SCAMP2;RPP25;C15orf17;MPI | 13     | LDproxy(CEU-Rel2) | 0.873                   | rs6495122  | Bcells (CD19+)                  | 3.92E-07      | 15  | 72912698 | ubt12t1w7_Z_FO  | CSK               | cis                         |        |        |                  |                |
| rs1133323 | DBP        | NA        | COX5A;SCAMP2;RPP25;C15orf17;MPI | 13     | LDproxy(CEU-Rel2) | 0.873                   | rs6495122  | Lymph                           | 4.47E-07      | 15  | 72912698 | GI_39930360-S   | ULK3              | cis                         |        |        |                  |                |
| rs1133323 | DBP        | NA        | COX5A;SCAMP2;RPP25;C15orf17;MPI | 13     | LDproxy(CEU-Rel2) | 0.873                   | rs6495122  | LCL (MuTHER)                    | 6.72E-07      | 15  | 72912698 | ILMN_1761262    | MPI               | cis                         |        |        |                  |                |
| rs1133323 | DBP        | NA        | COX5A;SCAMP2;RPP25;C15orf17;MPI | 13     | LDproxy(CEU-Rel2) | 0.873                   | rs6495122  | Skin (MuTHER)                   | 5.50E-06      | 15  | 72912698 | ILMN_1679495    | ULK3              | cis                         |        |        |                  |                |
| rs1133323 | DBP        | NA        | COX5A;SCAMP2;RPP25;C15orf17;MPI | 13     | LDproxy(CEU-Rel2) | 0.873                   | rs6495122  | Subc adipose (MuTHER)           | 3.13E-05      | 15  | 72912698 | ILMN_1695271    | RPP25             | cis                         |        |        |                  |                |
| rs1133323 | DBP        | NA        | COX5A;SCAMP2;RPP25;C15orf17;MPI | 13     | LDproxy(CEU-Rel2) | 0.873                   | rs6495122  | Monocytes (CD14+)               | 9.64E-05      | 15  | 72912698 | r_tdn3VF1vV3q\  | ULK3              | cis                         |        |        |                  |                |
| rs1133323 | DBP        | NA        | COX5A;SCAMP2;RPP25;C15orf17;MPI | 13     | LDproxy(CEU-Rel2) | 0.873                   | rs6495122  | Blood                           | 0.0002728     | 15  | 72912698 | HS600290189     | ARID3B            | cis                         |        |        |                  |                |
| rs1133323 | DBP        | NA        | COX5A;SCAMP2;RPP25;C15orf17;MPI | 13     | LDproxy(CEU-Rel2) | 0.873                   | rs6495122  | LCL in asthmatics (Liang 1kg)   | <2E-16        | 15  | 72912698 | 100312245_TG1_ε | RPP25             | cis                         |        |        |                  |                |
| rs1133323 | DBP        | NA        | COX5A;SCAMP2;RPP25;C15orf17;MPI | 13     | LDproxy(CEU-Rel2) | 0.873                   | rs6495122  | Blood(Fehrmann et al)           | 1.00E-25;1.5E | 15  | 72912698 | 3170239;4480132 | CSK;ULK3;SCAMP2;C | cis                         |        |        |                  |                |
| rs1133323 | DBP        | NA        | COX5A;SCAMP2;RPP25;C15orf17;MPI | 13     | LDproxy(CEU-1kg)  | 0.832                   | rs34063670 | Lung                            | 1.28E-18      | 15  | 73034209 | 218143_s_at     | SCAMP2            | cis                         |        |        |                  |                |
| rs1133323 | DBP        | NA        | COX5A;SCAMP2;RPP25;C15orf17;MPI | 13     | LDproxy(CEU-1kg)  | 0.832                   | rs11636892 | LCL in asthmatics (Liang 1kg)   | 2.81E-18      | 15  | 73053102 | 218143_s_at     | SCAMP2            | cis                         |        |        |                  |                |
| rs1133323 | DBP        | NA        | COX5A;SCAMP2;RPP25;C15orf17;MPI | 13     | LDproxy(CEU-1kg)  | 0.808                   | rs12917376 | LCL in asthmatics (Liang 1kg)   | 1.61E-22      | 15  | 72903220 | 202472_at       | MPI               | cis                         |        |        |                  |                |
| rs1133323 | DBP        | NA        | COX5A;SCAMP2;RPP25;C15orf17;MPI | 13     | LDproxy(CEU-1kg)  | 0.801                   | rs5638926  | LCL in asthmatics (Liang 1kg)   | 1.23E-18      | 15  | 73046388 | 218143_s_at     | SCAMP2            | cis                         |        |        |                  |                |
| rs1133323 | DBP        | NA        | COX5A;SCAMP2;RPP25;C15orf17;MPI | 13     | LDproxy(CEU-1kg)  | 0.801                   | rs35556055 | LCL in asthmatics (Liang 1kg)   | 2.88E-18      | 15  | 73040467 | 218143_s_at     | SCAMP2            | cis                         |        |        |                  |                |
| rs1133323 | DBP        | NA        | COX5A;SCAMP2;RPP25;C15orf17;MPI | 13     | LDproxy(CEU-1kg)  | 0.801                   | rs35556055 | Bcells (CD19+)                  | 0.0001316     | 15  | 73040467 | ubt12t1w7_Z_FO  | CSK               | cis                         |        |        |                  |                |
| rs1133323 | DBP        | NA        | COX5A;SCAMP2;RPP25;C15orf17;MPI | 13     | LDproxy(CEU-H3)   | 0.799                   | rs2290573  | Whole blood (CHARGE)            | 3.19E-20      | 15  | 72916647 | 4480132         | ULK3              | cis                         | -9.21  | A      | 15               | 72915933       |
| rs1133323 | DBP        | NA        | COX5A;SCAMP2;RPP25;C15orf17;MPI | 13     | LDproxy(CEU-H3)   | 0.799                   | rs2290573  | LCL in asthmatics (Liang 1kg)   | 3.77E-20      | 15  | 72916647 | 218143_s_at     | SCAMP2            | cis                         |        |        |                  |                |
| rs1133323 | DBP        | NA        | COX5A;SCAMP2;RPP25;C15orf17;MPI | 13     | LDproxy(CEU-H3)   | 0.799                   | rs2290573  | LCL (MuTHER)                    | 3.57E-07      | 15  | 72916647 | ILMN_1761262    | MPI               | cis                         |        |        |                  |                |
| rs1133323 | DBP        | NA        | COX5A;SCAMP2;RPP25;C15orf17;MPI | 13     | LDproxy(CEU-H3)   | 0.799                   | rs2290573  | Skin (MuTHER)                   | 8.85E-06      | 15  | 72916647 | ILMN_1679495    | ULK3              | cis                         |        |        |                  |                |
| rs1133323 | DBP        | NA        | COX5A;SCAMP2;RPP25;C15orf17;MPI | 13     | LDproxy(CEU-1kg)  | 0.798                   | rs11630087 | LCL in asthmatics (Liang 1kg)   | 1.82E-18      | 15  | 73048726 | 218143_s_at     | SCAMP2            | cis                         |        |        |                  |                |
| rs1133323 | DBP        | NA        | COX5A;SCAMP2;RPP25;C15orf17;MPI | 13     | LDproxy(CEU-1kg)  | 0.798                   | rs62029217 | LCL in asthmatics (Liang 1kg)   | 3.24E-18      | 15  | 73048952 | 218143_s_at     | SCAMP2            | cis                         |        |        |                  |                |
| rs1133323 | DBP        | NA        | COX5A;SCAMP2;RPP25;C15orf17;MPI | 13     | LDproxy(CEU-1kg)  | 0.771                   | rs12912343 | LCL in asthmatics (Liang 1kg)   | 1.30E-18      | 15  | 73038094 | 218143_s_at     | SCAMP2            | cis                         |        |        |                  |                |
| rs1133323 | DBP        | NA        | COX5A;SCAMP2;RPP25;C15orf17;MPI | 13     | LDproxy(CEU-1kg)  | 0.767                   | rs4886413  | LCL in asthmatics (Liang 1kg)   | 3.29E-18      | 15  | 73049363 | 218143_s_at     | SCAMP2            | cis                         |        |        |                  |                |
| rs1133323 | DBP        | NA        | COX5A;SCAMP2;RPP25;C15orf17;MPI | 13     | LDproxy(CEU-1kg)  | 0.75                    | rs11072518 | Whole blood (CHARGE)            | 1.57E-34      | 15  | 73021663 | 4480132         | ULK3              | cis                         | 12.26  | T      | 15               | 72915933       |
| rs1133323 | DBP        | NA        | COX5A;SCAMP2;RPP25;C15orf17;MPI | 13     | LDproxy(CEU-1kg)  | 0.75                    | rs11072518 | omental                         | 1.11E-13      | 15  | 73021663 | 10023814330     | MPI               | cis                         |        |        |                  |                |
| rs1133323 | DBP        | NA        | COX5A;SCAMP2;RPP25;C15orf17;MPI | 13     | LDproxy(CEU-1kg)  | 0.75                    | rs11072518 | Subc adipose (MuTHER)           | 8.68E-09      | 15  | 73021663 | ILMN_1679495    | ULK3              | cis                         |        |        |                  |                |
| rs1133323 | DBP        | NA        | COX5A;SCAMP2;RPP25;C15orf17;MPI | 13     | LDproxy(CEU-1kg)  | 0.75                    | rs11072518 | Lymph                           | 8.12E-08      | 15  | 73021663 | GI_4505234-S    | MPI               | cis                         |        |        |                  |                |
| rs1133323 | DBP        | NA        | COX5A;SCAMP2;RPP25;C15orf17;MPI | 13     | LDproxy(CEU-1kg)  | 0.75                    | rs11072518 | LCL (MuTHER)                    | 5.27E-07      | 15  | 73021663 | ILMN_1761262    | MPI               | cis                         |        |        |                  |                |
| rs1133323 | DBP        | NA        | COX5A;SCAMP2;RPP25;C15orf17;MPI | 13     | LDproxy(CEU-1kg)  | 0.75                    | rs11072518 | Skin (MuTHER)                   | 7.69E-07      | 15  | 73021663 | ILMN_1679495    | ULK3              | cis                         |        |        |                  |                |
| rs1133323 | DBP        | NA        | COX5A;SCAMP2;RPP25;C15orf17;MPI | 13     | LDproxy(CEU-1kg)  | 0.75                    | rs11072518 | Bcells (CD19+)                  | 3.32E-06      | 15  | 73021663 | ubt12t1w7_Z_FO  | CSK               | cis                         |        |        |                  |                |
| rs1133323 | DBP        | NA        | COX5A;SCAMP2;RPP25;C15orf17;MPI | 13     | LDproxy(CEU-1kg)  | 0.75                    | rs11072518 | Prefrontal cortex (Alzheimer's) | 3.32E-04      | 15  | 73021663 | 10023814330     | MPI               | cis                         |        |        |                  |                |
| rs1133323 | DBP        | NA        | COX5A;SCAMP2;RPP25;C15orf17;MPI | 13     | LDproxy(CEU-1kg)  | 0.75                    | rs11072518 | Monocytes (CD14+)               | 0.000374      | 15  | 73021663 | r_tdn3VF1vV3q\  | ULK3              | cis                         |        |        |                  |                |
| rs1133323 | DBP        | NA        | COX5A;SCAMP2;RPP25;C15orf17;MPI | 13     | LDproxy(CEU-1kg)  | 0.75                    | rs11072518 | Blood(Fehrmann et al)           | 1.90E-27;7.9E | 15  | 73021663 | 3170239;4480132 | CSK;ULK3;COX5A;SC | cis                         |        |        |                  |                |
| rs1133323 | DBP        | NA        | COX5A;SCAMP2;RPP25;C15orf17;MPI | 13     | LDproxy(CEU-Rel2) | 0.708                   | rs2290572  | Whole blood (CHARGE)            | 2.42E-29      | 15  | 72917626 | 4480132         | ULK3              | cis                         | 11.25  | A      | 15               | 72915933       |
| rs1133323 | DBP        | NA        | COX5A;SCAMP2;RPP25;C15orf17;MPI | 13     | LDproxy(CEU-Rel2) | 0.708                   | rs2290572  | LCL (MuTHER)                    | 1.67E-07      | 15  | 72917626 | ILMN_1761262    | MPI               | cis                         |        |        |                  |                |
| rs1133323 | DBP        | NA        | COX5A;SCAMP2;RPP25;C15orf17;MPI | 13     | LDproxy(CEU-Rel2) | 0.708                   | rs2290572  | Subc adipose (MuTHER)           | 1.58E-06      | 15  | 72917626 | ILMN_1679495    | ULK3              | cis                         |        |        |                  |                |
| rs1133323 | DBP        | NA        | COX5A;SCAMP2;RPP25;C15orf17;MPI | 13     | LDproxy(CEU-Rel2) | 0.708                   | rs2290572  | Bcells (CD19+)                  | 5.64E-06      | 15  | 72917626 | ubt12t1w7_Z_FO  | CSK               | cis                         |        |        |                  |                |
| rs1133323 | DBP        | NA        | COX5A;SCAMP2;RPP25;C15orf17;MPI | 13     | LDproxy(CEU-Rel2) | 0.708                   | rs2290572  | Skin (MuTHER)                   | 1.83E-05      | 15  | 72917626 | ILMN_1679495    | ULK3              | cis                         |        |        |                  |                |
| rs6092743 | DBP/SBP/MA | NA        | NA                              | 14     | LDproxy(CEU-1kg)  | 1                       | rs6026704  | Whole blood (CHARGE)            | 1.59E-08      | 20  | 57117540 | 4220259         | CTSZ              | cis                         | 5.65   | C      | 20               | 57003893       |
| rs6092743 | DBP/SBP/MA | NA        | NA                              | 14     | LDproxy(CEU-1kg)  | 1                       | rs7362597  | Whole blood (CHARGE)            | 1.60E-08      | 20  | 57112829 | 4220259         | CTSZ              | cis                         | 5.65   | A      | 20               | 57003893       |
| rs6092743 | DBP/SBP/MA | NA        | NA                              | 14     | LDproxy(CEU-1kg)  | 1                       | rs6100342  | Whole blood (CHARGE)            | 2.28E-08      | 20  | 57132656 | 4220259         | CTSZ              | cis                         | 5.59   | C      | 20               | 57003893       |
| rs6092743 | DBP/SBP/MA | NA        | NA                              | 14     | LDproxy(CEU-1kg)  | 1                       | rs882384   | Whole blood (CHARGE)            | 2.28E-08      | 20  | 57132808 | 4220259         | CTSZ              | cis                         | 5.59   | T      | 20               | 57003893       |
| rs6092743 | DBP/SBP/MA | NA        | NA                              | 14     | LDproxy(CEU-1kg)  | 1                       | rs998981   | Whole blood (CHARGE)            | 2.44E-08      | 20  | 57133036 | 4220259         | CTSZ              | cis                         | 5.58   | T      | 20               | 57003893       |
| rs6092743 | DBP/SBP/MA | NA        | NA                              | 14     | LDproxy(CEU-1kg)  | 1                       | rs6100343  | Whole blood (CHARGE)            | 2.70E-08      | 20  | 57133607 | 4220259         | CTSZ              | cis                         | 5.56   | A      | 20               | 57003893       |
| rs6092743 | DBP/SBP/MA | NA        | NA                              | 14     | LDproxy(CEU-1kg)  | 0.915                   | rs1465537  | Whole blood (CHARGE)            | 2.37E-08      | 20  | 57131415 | 4220259         | CTSZ              | cis                         | 5.58   | T      | 20               | 57003893       |
| rs6092743 | DBP/SBP/MA | NA        | NA                              | 14     | LDproxy(CEU-1kg)  | 0.85                    | rs6100340  | Whole blood (CHARGE)            | 2.53E-08      | 20  | 57118007 | 4220259         | CTSZ              | cis                         | 5.57   | G      | 20               | 57003893       |

**Table S6: PUUMA cohort characteristics.**

| <i>N</i> | Age,<br>years (sd) | BMI,<br>kg/m <sup>2</sup> (sd) | SBP, mmHg<br>(sd) | DBP,<br>mmHg (sd) | Anti-<br>hypertensive<br>therapy (%) | SBP, mmHg,<br>adjusted for<br>antihypertensive<br>therapy (sd) | DBP, mmHg,<br>adjusted for<br>antihypertensive<br>therapy (sd) |
|----------|--------------------|--------------------------------|-------------------|-------------------|--------------------------------------|----------------------------------------------------------------|----------------------------------------------------------------|
| 5,605    | 57.35 (9.02)       | 26.07 (3.38)                   | 133.92 (16.61)    | 74.92 (9.95)      | 33.52%                               | 138.95 (19.88)                                                 | 78.27 (11.42)                                                  |



**Table S7: LTA discovery analysis summary for loci with SNP association(s)  $P$  value  $< 5 \times 10^{-7}$ , and association results in GBPG Visit 1 BP analyses.A1**

| CHARGE DISCOVERY |           |     |           |         |         |           |                     |           |           |         |        |          | GBPG V1 Association Results |           |           |          |             |
|------------------|-----------|-----|-----------|---------|---------|-----------|---------------------|-----------|-----------|---------|--------|----------|-----------------------------|-----------|-----------|----------|-------------|
| Trait            | SNPID     | Chr | Pos2      | Allele1 | Allele2 | InRefGen  | RefGenes            | ClosestR  | Direction | Beta    | s.e.   | P        | Trait                       | SNPID     | Beta      | s.e.     | P           |
| CHARGE_LTA - DBP | rs1204627 | 1   | 10722164  | t       | c       | CASZ1     | CASZ1 CASZ1         | CASZ1     | -----?    | -0.3223 | 0.0597 | 2.29E-07 | GBPG V1-DBP                 | rs1204627 | -0.2799   | 0.0934   | 0.002726    |
| CHARGE_LTA - DBP | rs1330656 | 1   | 11788391  | a       | g       | MTHFR     | MTHFR;N MTHFR       | MTHFR     | +++++---- | 0.4789  | 0.0723 | 2.08E-10 | GBPG V1-DBP                 | rs1330656 | 0.4529    | 0.1083   | 0.00002905  |
| CHARGE_LTA - DBP | rs2004776 | 1   | 228915325 | t       | c       | AGT       | AGT;COG AGT         | AGT       | +++++---- | 0.3545  | 0.0615 | 3.20E-08 | GBPG V1-DBP                 | rs2004776 | 0.1014    | 0.091    | 0.2656      |
| CHARGE_LTA - DBP | rs1275988 | 2   | 26767868  | t       | c       |           | KCNK3;C1KCNK3       | KCNK3     | -----+    | -0.2814 | 0.0534 | 4.25E-07 | GBPG V1-DBP                 | rs1275988 | -0.1123   | 0.0775   | 0.1473      |
| CHARGE_LTA - DBP | rs7599598 | 2   | 96715567  | a       | g       |           | FLJ10081;FER1L5     |           | -----     | -0.314  | 0.0543 | 2.91E-08 | GBPG V1-DBP                 | rs7599598 | -0.0403   | 0.0799   | 0.6139      |
| CHARGE_LTA - DBP | rs1528293 | 3   | 170637205 | a       | t       | MDS1      | MDS1 MDS1           | MDS1      | +++++---- | 0.2738  | 0.0522 | 4.96E-07 | GBPG V1-DBP                 | rs1528293 | 0.2427    | 0.0769   | 0.00161     |
| CHARGE_LTA - DBP | rs1952650 | 5   | 157746045 | a       | t       |           | EBF1                |           | +++++---- | 0.2862  | 0.0523 | 1.58E-07 | GBPG V1-DBP                 | rs1952650 | 0.2984    | 0.0765   | 0.00009565  |
| CHARGE_LTA - DBP | rs198823  | 6   | 26230912  | t       | g       |           | HIST1H2E;HIST1H2E   | HIST1H2E  | -----+    | -0.3346 | 0.0553 | 6.57E-09 | GBPG V1-DBP                 | rs198823  | -0.1705   | 0.0801   | 0.03331     |
| CHARGE_LTA - DBP | rs1225896 | 10  | 18767965  | c       | g       | CACNB2    | CACNB2 CACNB2       | CACNB2    | +++++---- | 0.3548  | 0.0571 | 2.48E-09 | GBPG V1-DBP                 | rs1225896 | 0.2836    | 0.0834   | 0.0006716   |
| CHARGE_LTA - DBP | rs1224484 | 10  | 63109192  | t       | g       | C10orf107 | C10orf107 C10orf107 | C10orf107 | -----+    | -0.3784 | 0.0627 | 7.05E-09 | GBPG V1-DBP                 | rs1224484 | -0.432    | 0.0901   | 0.000001618 |
| CHARGE_LTA - DBP | rs1084142 | 12  | 20046661  | a       | t       |           | PDE3A               |           | +++++---- | 0.3604  | 0.0651 | 1.09E-07 | GBPG V1-DBP                 | rs1084142 | 0.3446    | 0.091    | 0.0002492   |
| CHARGE_LTA - DBP | rs2681472 | 12  | 88533090  | a       | g       | ATP2B1    | ATP2B1 ATP2B1       | ATP2B1    | +++++---- | 0.5231  | 0.0691 | 4.01E-13 | GBPG V1-DBP                 | rs2681472 | 0.336     | 0.1065   | 0.001608    |
| CHARGE_LTA - DBP | rs3184504 | 12  | 110368991 | t       | c       | SH2B3     | SH2B3;AT SH2B3      | SH2B3     | +++++---- | 0.3936  | 0.0524 | 6.08E-13 | GBPG V1-DBP                 | rs3184504 | 0.4265    | 0.0789   | 6.361E-08   |
| CHARGE_LTA - DBP | rs1133323 | 15  | 72999278  | t       | c       |           | COX5A;M1COX5A       | COX5A     | -----     | -0.3262 | 0.0526 | 2.66E-09 | GBPG V1-DBP                 | rs1133323 | -0.2747   | 0.0763   | 0.000321    |
| CHARGE_LTA - DBP | rs167479  | 19  | 11387765  | t       | g       | RGL3      | EPOR;EL RGL3        | RGL3      | -----??   | -0.3913 | 0.0729 | 2.67E-07 | GBPG V1-DBP                 | rs167479  | -0.942    | 0.597    | 0.1146      |
| CHARGE_LTA - DBP | rs6092743 | 20  | 57133765  | a       | g       |           | C20orf174           |           | +++++---- | 0.502   | 0.0843 | 1.11E-08 | GBPG V1-DBP                 | rs6092743 | 0.3393    | 0.1436   | 0.01814     |
| CHARGE_LTA - SBP | rs880315  | 1   | 10719453  | t       | c       | CASZ1     | CASZ1 CASZ1         | CASZ1     | -----?    | -0.7125 | 0.1005 | 7.98E-12 | GBPG V1-SBP                 | rs880315  | -0.2245   | 0.1504   | 0.1355      |
| CHARGE_LTA - SBP | rs1330656 | 1   | 11788391  | a       | g       | MTHFR     | MTHFR;N MTHFR       | MTHFR     | +++++---- | 0.8795  | 0.1235 | 6.38E-12 | GBPG V1-SBP                 | rs1330656 | 0.7349    | 0.1646   | 0.000007978 |
| CHARGE_LTA - SBP | rs2004776 | 1   | 228915325 | t       | c       | AGT       | AGT;COG;AGT         | AGT       | +++++---- | 0.5488  | 0.1049 | 4.45E-07 | GBPG V1-SBP                 | rs2004776 | 0.1419    | 0.1395   | 0.3091      |
| CHARGE_LTA - SBP | rs1275988 | 2   | 26767868  | t       | c       | NA        | KCNK3;C1KCNK3       | KCNK3     | -----+    | -0.6004 | 0.0917 | 2.61E-10 | GBPG V1-SBP                 | rs1275988 | -0.2554   | 0.1175   | 0.02977     |
| CHARGE_LTA - SBP | rs6712094 | 2   | 164751706 | a       | g       | NA        | NA GRB14            | GRB14     | +++++---- | 0.598   | 0.1007 | 9.89E-09 | GBPG V1-SBP                 | rs6712094 | 0.4239    | 0.1298   | 0.001095    |
| CHARGE_LTA - SBP | rs9823197 | 3   | 11478133  | a       | t       | ATG7      | ATG7 ATG7           | ATG7      | -----+    | -0.4884 | 0.0915 | 2.58E-07 | GBPG V1-SBP                 | rs9823197 | -0.2888   | 0.1168   | 0.01344     |
| CHARGE_LTA - SBP | rs7733331 | 5   | 32864603  | t       | c       | NA        | C5orf23;N C5orf23   | C5orf23   | -----+    | -0.5505 | 0.0911 | 5.38E-09 | GBPG V1-SBP                 | rs7733331 | -0.4965   | 0.118    | 0.00002564  |
| CHARGE_LTA - SBP | rs1253434 | 7   | 27242452  | a       | g       | NA        | HOXA13;HEVX1        | HEVX1     | -----?    | -1.5903 | 0.292  | 1.48E-07 | GBPG V1-SBP                 | rs1253434 | -0.6512   | 0.3214   | 0.04273     |
| CHARGE_LTA - SBP | rs1270539 | 7   | 106198013 | a       | g       | NA        | NA PIK3CG           | PIK3CG    | +++++---- | 0.6307  | 0.11   | 3.17E-08 | GBPG V1-SBP                 | rs1270539 | 0.4007    | 0.1371   | 0.003466    |
| CHARGE_LTA - SBP | rs1267714 | 8   | 11488146  | c       | g       | NA        | BLK BLK             | BLK       | -----     | -0.5272 | 0.0988 | 2.60E-07 | GBPG V1-SBP                 | rs1267714 | -0.1581   | 0.1218   | 0.194       |
| CHARGE_LTA - SBP | rs1225896 | 10  | 18767965  | c       | g       | CACNB2    | CACNB2 CACNB2       | CACNB2    | +++++---- | 0.6307  | 0.0976 | 4.53E-10 | GBPG V1-SBP                 | rs1225896 | 0.3876    | 0.1268   | 0.002244    |
| CHARGE_LTA - SBP | rs7070797 | 10  | 63221779  | a       | g       | NA        | C10orf107 C10orf107 | C10orf107 | -----+    | -0.7415 | 0.1306 | 4.30E-08 | GBPG V1-SBP                 | rs7070797 | -0.6611   | 0.174    | 0.0001443   |
| CHARGE_LTA - SBP | rs1926032 | 10  | 104819459 | t       | c       | CNNM2     | NT5C2;CN CNNM2      | CNNM2     | -----+    | -0.9087 | 0.1715 | 3.15E-07 | GBPG V1-SBP                 | rs1926032 | -1.0971   | 0.2137   | 2.826E-07   |
| CHARGE_LTA - SBP | rs2681472 | 12  | 88533090  | a       | g       | ATP2B1    | ATP2B1 ATP2B1       | ATP2B1    | +++++---- | 0.9457  | 0.118  | 1.04E-14 | GBPG V1-SBP                 | rs2681472 | 0.6305    | 0.1646   | 0.0001282   |
| CHARGE_LTA - SBP | rs4766578 | 12  | 110388754 | a       | t       | ATXN2     | SH2B3;AT ATXN2      | SH2B3     | -----+    | -0.5599 | 0.0909 | 2.82E-09 | GBPG V1-SBP                 | rs4766578 | -0.4787   | 0.1201   | 0.00006713  |
| CHARGE_LTA - SBP | rs35444   | 12  | 114036820 | a       | g       | NA        | +++++---- TBX3      | TBX3      | +++++---- | 0.5452  | 0.0929 | 1.47E-08 | GBPG V1-SBP                 | rs35444   | 0.1568    | 0.1226   | 0.2009      |
| CHARGE_LTA - SBP | rs1107251 | 15  | 73021663  | t       | c       | NA        | COX5A;S1COX5A       | COX5A     | +++++---- | 0.5692  | 0.0947 | 6.54E-09 | GBPG V1-SBP                 | rs1107251 | 0.3548    | 0.12     | 0.003102    |
| CHARGE_LTA - SBP | rs6092743 | 20  | 57133765  | a       | g       | NA        | NA C20orf174        | C20orf174 | +++++---- | 0.8396  | 0.1449 | 2.25E-08 | GBPG V1-SBP                 | rs6092743 | 0.8599    | 0.2202   | 0.00009393  |
| CHARGE_LTA - MAP | rs880315  | 1   | 10719453  | t       | c       | CASZ1     | CASZ1 CASZ1         | CASZ1     | -----?    | -0.4597 | 0.067  | 5.49E-11 | GBPG V1-MAP                 | rs880315  | -0.244967 | 0.108505 | 0.023966954 |
| CHARGE_LTA - MAP | rs1330656 | 1   | 11788391  | a       | g       | MTHFR     | MTHFR;N MTHFR       | MTHFR     | +++++---- | 0.6133  | 0.0832 | 1.83E-12 | GBPG V1-MAP                 | rs1330656 | 0.5469    | 0.11748  | 3.23559E-06 |
| CHARGE_LTA - MAP | rs2004776 | 1   | 228915325 | t       | c       | AGT       | AGT;COG;AGT         | AGT       | +++++---- | 0.4226  | 0.0708 | 1.18E-08 | GBPG V1-MAP                 | rs2004776 | 0.1149    | 0.099071 | 0.246143016 |
| CHARGE_LTA - MAP | rs1275988 | 2   | 26767868  | t       | c       | NA        | KCNK3;C1KCNK3       | KCNK3     | -----+    | -0.3894 | 0.0616 | 1.51E-09 | GBPG V1-MAP                 | rs1275988 | -0.16     | 0.083983 | 0.056759651 |
| CHARGE_LTA - MAP | rs6712094 | 2   | 164751706 | a       | g       | NA        | NA GRB14            | GRB14     | +++++---- | 0.385   | 0.0677 | 5.42E-08 | GBPG V1-MAP                 | rs6712094 | 0.2713    | 0.092326 | 0.003297944 |
| CHARGE_LTA - MAP | rs1528293 | 3   | 170637205 | a       | t       | MDS1      | MDS1 MDS1           | MDS1      | +++++---- | 0.3361  | 0.0602 | 9.29E-08 | GBPG V1-MAP                 | rs1528293 | 0.279367  | 0.083395 | 0.000808377 |
| CHARGE_LTA - MAP | rs7728845 | 5   | 122933582 | a       | g       | CSNK1G3   | CSNK1G3 CSNK1G3     | CSNK1G3   | +++++---- | 0.3766  | 0.0712 | 4.34E-07 | GBPG V1-MAP                 | rs7728845 | 0.3521    | 0.099069 | 0.000379275 |
| CHARGE_LTA - MAP | rs198846  | 6   | 26215442  | a       | g       | NA        | HIST1H2B HIST1H1T   | HIST1H2B  | +++++---- | 0.4829  | 0.085  | 5.69E-08 | GBPG V1-MAP                 | rs198846  | 0.5286    | 0.120456 | 1.1423E-05  |
| CHARGE_LTA - MAP | rs7794193 | 7   | 27261226  | a       | g       | NA        | HOXA13;E EVX1       | EVX1      | -----+    | -0.914  | 0.1724 | 4.03E-07 | GBPG V1-MAP                 | rs7794193 | -0.296533 | 0.205208 | 0.148447395 |
| CHARGE_LTA - MAP | rs1225896 | 10  | 18767965  | c       | g       | CACNB2    | CACNB2 CACNB2       | CACNB2    | +++++---- | 0.452   | 0.0657 | 4.98E-11 | GBPG V1-MAP                 | rs1225896 | 0.318267  | 0.090482 | 0.000435732 |
| CHARGE_LTA - MAP | rs2166122 | 10  | 63193080  | t       | c       | C10orf107 | C10orf107 C10orf107 | C10orf107 | -----+    | -0.4812 | 0.0766 | 1.88E-09 | GBPG V1-MAP                 | rs2166122 | -0.439133 | 0.101765 | 1.5948E-05  |

| CHARGE DISCOVERY        |                  |           |                 |          |          |               |               |               |               |               |               |                 | GBPG V1 Association Results |                  |                 |                 |                    |
|-------------------------|------------------|-----------|-----------------|----------|----------|---------------|---------------|---------------|---------------|---------------|---------------|-----------------|-----------------------------|------------------|-----------------|-----------------|--------------------|
| Trait                   | SNPID            | Chr       | Pos2            | Allele1  | Allele2  | InRefGen      | RefGenes      | ClosestR      | Direction     | Beta          | s.e.          | P               | Trait                       | SNPID            | Beta            | s.e.            | P                  |
| CHARGE_LTA - MAP        | rs1084142        | 12        | 20046661        | a        | t        | NA            | NA            | PDE3A         | +++++++       | 0.4081        | 0.0749        | 1.91E-07        | GBPG V1-MAP                 | rs1084142        | 0.3641          | 0.102461        | 0.000380063        |
| <b>CHARGE_LTA - MAP</b> | <b>rs2681472</b> | <b>12</b> | <b>88533090</b> | <b>a</b> | <b>g</b> | <b>ATP2B1</b> | <b>ATP2B1</b> | <b>ATP2B1</b> | <b>++++++</b> | <b>0.6861</b> | <b>0.0796</b> | <b>1.77E-16</b> | <b>GBPG V1-MAP</b>          | <b>rs2681472</b> | <b>0.434167</b> | <b>0.116348</b> | <b>0.000190261</b> |
| CHARGE_LTA - MAP        | rs3184504        | 12        | 110368991       | t        | c        | SH2B3         | SH2B3;AT      | SH2B3         | ++++-+++      | 0.4469        | 0.0605        | 1.68E-12        | GBPG V1-MAP                 | rs3184504        | 0.4366          | 0.085613        | 3.40191E-07        |
| CHARGE_LTA - MAP        | rs35444          | 12        | 114036820       | a        | g        | NA            | NA            | TBX3          | ++++-++       | 0.3621        | 0.0626        | 3.20E-08        | GBPG V1-MAP                 | rs35444          | 0.1762          | 0.087588        | 0.0442516          |
| CHARGE_LTA - MAP        | rs1107251        | 15        | 73021663        | t        | c        | NA            | COX5A;S       | COX5A         | ++++-+++      | 0.4315        | 0.0636        | 8.95E-11        | GBPG V1-MAP                 | rs1107251        | 0.308667        | 0.085802        | 0.000321354        |
| CHARGE_LTA - MAP        | rs167479         | 19        | 11387765        | t        | g        | RGL3          | EPOR;EL       | RGL3          | -----??       | -0.4521       | 0.0839        | 2.60E-07        | GBPG V1-MAP                 | rs167479         | -0.848267       | 0.716338        | 0.236345161        |
| CHARGE_LTA - MAP        | rs6092743        | 20        | 57133765        | a        | g        | NA            | NA            | C20orf174     | +++++++       | 0.6372        | 0.0971        | 3.60E-10        | GBPG V1-MAP                 | rs6092743        | 0.512833        | 0.156357        | 0.001038468        |
| CHARGE_LTA - PP         | rs880315         | 1         | 10719453        | t        | c        | CASZ1         | CASZ1         | CASZ1         | -----?        | -0.421        | 0.0703        | 5.45E-09        | GBPG V1-PP                  | rs880315         | 0.0307          | 0.106922        | 0.7740173          |
| CHARGE_LTA - PP         | rs7650227        | 3         | 41769941        | t        | g        | ULK4          | ULK4          | ULK4          | +++++++       | 0.5006        | 0.0821        | 2.84E-09        | GBPG V1-PP                  | rs7650227        | 0.1716          | 0.103931        | 0.098717837        |
| CHARGE_LTA - PP         | rs7733331        | 5         | 32864603        | t        | c        | NA            | C5orf23;N     | C5orf23       | -----         | -0.3328       | 0.0629        | 2.57E-07        | GBPG V1-PP                  | rs7733331        | -0.2292         | 0.083972        | 0.006343693        |
| CHARGE_LTA - PP         | rs1094807        | 6         | 43388691        | t        | c        | NA            | CRIP3;S       | CRIP3         | -----         | -0.3846       | 0.0652        | 9.06E-09        | GBPG V1-PP                  | rs1094807        | -0.2368         | 0.087317        | 0.00668842         |
| CHARGE_LTA - PP         | rs2949837        | 7         | 45960903        | a        | t        | NA            | IGFBP3        | IGFBP3        | +++++++       | 0.402         | 0.0706        | 2.94E-08        | GBPG V1-PP                  | rs2949837        | 0.1539          | 0.09346         | 0.099622491        |
| CHARGE_LTA - PP         | rs1270539        | 7         | 106198013       | a        | g        | NA            | NA            | PIK3CG        | ++++-+++      | 0.5865        | 0.0759        | 5.40E-14        | GBPG V1-PP                  | rs1270539        | 0.3968          | 0.097497        | 4.70E-05           |
| CHARGE_LTA - PP         | rs1225537        | 10        | 114798892       | t        | g        | TCF7L2        | TCF7L2        | TCF7L2        | +++++++       | 0.3527        | 0.0676        | 3.71E-07        | GBPG V1-PP                  | rs1225537        | 0.0856          | 0.093633        | 0.360610278        |
| CHARGE_LTA - PP         | rs2681485        | 12        | 88549753        | a        | g        | ATP2B1        | ATP2B1        | ATP2B1        | ++++-+++      | 0.3373        | 0.0627        | 1.61E-07        | GBPG V1-PP                  | rs2681485        | 0.1402          | 0.08435         | 0.096489798        |
| CHARGE_LTA - PP         | rs1077479        | 12        | 114036981       | t        | c        | NA            | NA            | TBX3          | -----         | -0.3362       | 0.0649        | 4.61E-07        | GBPG V1-PP                  | rs1077479        | 0.0242          | 0.085378        | 0.776834436        |
| CHARGE_LTA - PP         | rs672154         | 20        | 10421266        | a        | g        | C20orf94      | MKKS;C2       | C20orf94      | -----         | -0.3288       | 0.0629        | 3.54E-07        | GBPG V1-PP                  | rs672154         | -0.1229         | 0.084282        | 0.144783527        |
| CHARGE_LTA - PP         | rs6077869        | 20        | 10598510        | a        | g        | JAG1          | JAG1;C20      | JAG1          | ++++-+++      | 0.3803        | 0.0732        | 4.15E-07        | GBPG V1-PP                  | rs6077869        | 0.11            | 0.098691        | 0.265026095        |

Rows in **bold** show LTA analysis  $P$  values  $< 5 \times 10^{-8}$ .

**Table S8: Summary of number of SNPs and loci identified by LTA**

**Number of significant SNPs**

|       | <i>P</i> value < 5x10 <sup>-8</sup> |          |
|-------|-------------------------------------|----------|
|       | #LTA SNPs                           | #V1 SNPs |
| SBP   | 117                                 | 122      |
| DBP   | 96                                  | 126      |
| MAP   | 155                                 | 153      |
| PP    | 120                                 | 1        |
| Total | 488                                 | 402      |

**Number of significant Loci**

|       | <i>P</i> value < 5x10 <sup>-8</sup> |          |
|-------|-------------------------------------|----------|
|       | #LTA loci                           | #V1 loci |
| SBP   | 13                                  | 8        |
| DBP   | 10                                  | 9        |
| MAP   | 11                                  | 9        |
| PP    | 5                                   | 1        |
| Total | 39                                  | 27       |

**Table S9: Distribution of LTA *P* values as compared to the corresponding V1 BP trait analysis *P* values**

|                                 |                                        |                              |                                         |
|---------------------------------|----------------------------------------|------------------------------|-----------------------------------------|
| SBP (delta distribution)        | Extreme values* (right tail+left tail) | Non-Extreme values (central) | Chisquare test <i>P</i> value < 2.2e-16 |
| Total SNP distributed as normal | 40013                                  | 2480814                      |                                         |
| LTA SNP (pGC<5e-8)              | 101                                    | 16                           |                                         |
| DBP (delta distribution)        | Extreme values* (right tail+left tail) | Non-Extreme values (central) | Chisquare test <i>P</i> value < 2.2e-16 |
| Total SNP distributed as normal | 29775                                  | 2491052                      |                                         |
| LTA SNP (pGC<5e-8)              | 64                                     | 32                           |                                         |
| MAP (delta distribution)        | Extreme values* (right tail+left tail) | Non-Extreme values (central) | Chisquare test <i>P</i> value < 2.2e-16 |
| Total SNP distributed as normal | 32885                                  | 2487942                      |                                         |
| LTA SNP (pGC<5e-8)              | 123                                    | 32                           |                                         |
| PP (delta distribution)         | Extreme values* (right tail+left tail) | Non-Extreme values (central) | Chisquare test <i>P</i> value < 2.2e-16 |
| Total SNP distributed as normal | 36139                                  | 2484688                      |                                         |
| LTA SNP (pGC<5e-8)              | 120                                    | 0                            |                                         |

\*Extreme values are defined as values that are larger than 'mean+3\*sd' or smaller than 'mean-3\*sd'

**Table S10: Power simulations for the application of LTA to SBP.**

**a: Correlation between the 4 visits for SBP residual adjusted for BMI, age, and age\*age and gender in ARIC.**

|        | <b>SBP<br/>V1</b> | <b>SBP<br/>V2</b> | <b>SBP<br/>V3</b> | <b>SBP<br/>V4</b> |
|--------|-------------------|-------------------|-------------------|-------------------|
| SBP V1 | 1.00              | 0.73              | 0.65              | 0.60              |
| SBP V2 | 0.73              | 1.00              | 0.72              | 0.64              |
| SBP V3 | 0.65              | 0.72              | 1.00              | 0.70              |
| SBP V4 | 0.60              | 0.64              | 0.70              | 1.00              |

**b1: Power Estimates. Sample size N = 1000 and testing at alpha=0.05. The true effect size is 0.1. Monte Carlo size 10,000.**

| <b>q</b>       | <b>0.05</b> | <b>0.10</b> | <b>0.20</b> | <b>0.30</b> | <b>0.40</b> |
|----------------|-------------|-------------|-------------|-------------|-------------|
| Visit 1        | 0.16        | 0.27        | 0.43        | 0.52        | 0.59        |
| LTA            | 0.19        | 0.33        | 0.52        | 0.63        | 0.70        |
| GEE (4 visits) | 0.20        | 0.34        | 0.52        | 0.64        | 0.70        |

**b2: Power Estimates, Null Hypothesis. Sample size N = 1000 and testing at alpha=0.05.**

**The true effect size is 0. Monte Carlo size 10,000.**

| <b>q</b>       | <b>0.05</b> | <b>0.10</b> | <b>0.20</b> | <b>0.30</b> | <b>0.40</b> |
|----------------|-------------|-------------|-------------|-------------|-------------|
| Visit 1        | 0.050       | 0.048       | 0.048       | 0.050       | 0.047       |
| LTA            | 0.053       | 0.051       | 0.052       | 0.048       | 0.048       |
| GEE (4 visits) | 0.059       | 0.052       | 0.051       | 0.051       | 0.050       |

**c: Sample size N = 10000 and testing at alpha = 5x10-8. The true effect size is 0.05. Monte Carlo size 5,000.**

|                | <b>0.05</b> | <b>0.1</b> | <b>0.2</b> | <b>0.3</b> | <b>0.4</b> |
|----------------|-------------|------------|------------|------------|------------|
| Visit 1        | 0           | 0.001      | 0.005      | 0.011      | 0.023      |
| LTA            | 0           | 0.002      | 0.015      | 0.039      | 0.070      |
| GEE (4 visits) | 0           | 0.002      | 0.015      | 0.039      | 0.071      |



**Table S11: Enrichment analysis results**

| Stronger results in LTA versus V1 analysis | Summary of lead SNPs and LTA and V1 results |            |         |       |           |           |                   |                |             |             | Tested Region  |              |        | Pvalue of Kolmogorov–Smirnov statistics with 10000 permutations |                   | Pvalue of 10000 times Bootstrapping compared to the statistics from the |                   |
|--------------------------------------------|---------------------------------------------|------------|---------|-------|-----------|-----------|-------------------|----------------|-------------|-------------|----------------|--------------|--------|-----------------------------------------------------------------|-------------------|-------------------------------------------------------------------------|-------------------|
|                                            | trait                                       | SNPID      | Allele1 | Chr   | Position  | InRefGene | RefGenes.60kbfrom | ClosestRefGene | LTA P value | V1 P value  | Position Start | Position End | # SNPs | D-.Pvalue                                                       | D+.Pvalue         | D-.Pvalue                                                               | D+.Pvalue         |
| LTA                                        | SBP                                         | rs13306561 | a       | 1p36  | 11788391  | MTHFR     | MTHFR;NPPA;CLCN   | MTHFR          | 6.38E-12    | 1.11E-07    | 11775103       | 11847887     | 102    | 0.4522                                                          | <b>1.00E-04</b>   | 0.3983                                                                  | <b>&lt;0.0001</b> |
| LTA                                        | SBP                                         | rs1275988  | t       | 2p23  | 26767868  | NA        | KCNK3;CIB4        | KCNK3          | 2.61E-10    | 1.38E-05    | 26765249       | 26786300     | 10     | 1                                                               | <b>&lt;0.0001</b> | 1                                                                       | <b>&lt;0.0001</b> |
| LTA                                        | SBP                                         | rs6712094  | a       | 2q24  | 164751706 | NA        | NA                | GRB14          | 9.89E-09    | 5.22E-07    | 164722539      | 164839114    | 175    | 0.6859                                                          | <b>2.00E-04</b>   | 0.7081                                                                  | <b>&lt;0.0001</b> |
| LTA                                        | SBP                                         | rs7733331  | t       | 5p13  | 32864603  | NA        | C5orf23;NPR3      | C5orf23        | 5.38E-09    | 0.000141351 | 32810804       | 32867696     | 43     | 1                                                               | <b>0.0016</b>     | 1                                                                       | <b>4.00E-04</b>   |
| LTA                                        | SBP                                         | rs12705390 | a       | 7q22  | 106198013 | NA        | NA                | PIK3CG         | 3.17E-08    | 2.63E-05    | 106192878      | 106199094    | 20     | 0.956                                                           | <b>4.00E-04</b>   | 0.9823                                                                  | <b>1.00E-04</b>   |
| LTA                                        | SBP                                         | rs7070797  | a       | 10q21 | 63221779  | NA        | C10orf107         | C10orf107      | 4.30E-08    | 1.17E-06    | 63190704       | 63221779     | 48     | 0.7187                                                          | <b>0.0024</b>     | 0.7434                                                                  | <b>1.00E-04</b>   |
| LTA                                        | DBP                                         | rs13306561 | a       | 1p36  | 11788391  | MTHFR     | MTHFR;NPPA;CLCN   | MTHFR          | 2.08E-10    | 1.28E-07    | 11783430       | 11828561     | 83     | 0.7217                                                          | <b>&lt;0.0001</b> | 0.7821                                                                  | <b>&lt;0.0001</b> |
| LTA                                        | DBP                                         | rs1952650  | a       | 5q33  | 157746045 | NA        | NA                | EBF1           | 1.58E-07    | 2.16E-05    | 157746045      | 157746045    | 82     | 0.3685                                                          | <b>&lt;0.0001</b> | 0.3102                                                                  | <b>&lt;0.0001</b> |
| LTA                                        | DBP                                         | rs198823   | t       | 6p22  | 26230912  | NA        | HIST1H2BD;HIST1H2 | HIST1H2BC      | 6.57E-09    | 4.52E-06    | 26150218       | 26233321     | 155    | 0.8544                                                          | <b>&lt;0.0001</b> | 0.8949                                                                  | <b>&lt;0.0001</b> |
| LTA                                        | DBP                                         | rs3184504  | t       | 12q24 | 110368991 | SH2B3     | SH2B3;ATXN2       | SH2B3          | 6.08E-13    | 1.26E-08    | 110368991      | 111390798    | 277    | 0.9517                                                          | <b>&lt;0.0001</b> | 0.9721                                                                  | <b>&lt;0.0001</b> |
| LTA                                        | MAP                                         | rs880315   | t       | 1p36  | 10719453  | CASZ1     | CASZ1             | CASZ1          | 5.49E-11    | 1.47E-07    | 10713384       | 10724576     | 9      | 0.856                                                           | <b>0.0081</b>     | 0.9464                                                                  | <b>0.0042</b>     |
| LTA                                        | MAP                                         | rs13306561 | a       | 1p36  | 11788391  | MTHFR     | MTHFR;NPPA;CLCN   | MTHFR          | 1.83E-12    | 1.48E-08    | 11775103       | 11847887     | 104    | 0.7774                                                          | <b>1.00E-04</b>   | 0.8154                                                                  | <b>&lt;0.0001</b> |
| LTA                                        | MAP                                         | rs1275988  | t       | 2p23  | 26767868  | NA        | KCNK3;CIB4        | KCNK3          | 1.51E-09    | 7.06E-06    | 26765249       | 26786300     | 10     | 1                                                               | <b>3.00E-04</b>   | 1                                                                       | <b>&lt;0.0001</b> |
| LTA                                        | MAP                                         | rs2681472  | a       | 12q21 | 88533090  | ATP2B1    | ATP2B1            | ATP2B1         | 1.77E-16    | 1.70E-12    | 88465680       | 88637201     | 132    | 0.3985                                                          | <b>&lt;0.0001</b> | 0.3285                                                                  | <b>&lt;0.0001</b> |
| LTA                                        | PP                                          | rs10948071 | t       | 6p21  | 43388691  | NA        | CRIP3;SLC22A7;TTE | CRIP3          | 9.06E-09    | 0.000111242 | 43367990       | 43440164     | 49     | 0.9211                                                          | <b>&lt;0.0001</b> | 0.9491                                                                  | <b>&lt;0.0001</b> |
| LTA                                        | PP                                          | rs2949837  | a       | 7p13  | 45960903  | NA        | IGFBP3            | IGFBP3         | 2.94E-08    | 6.88E-06    | 45929639       | 45960903     | 49     | 1                                                               | <b>&lt;0.0001</b> | 1                                                                       | <b>&lt;0.0001</b> |
| LTA                                        | PP                                          | rs12705390 | a       | 7q22  | 106198013 | NA        | NA                | PIK3CG         | 5.40E-14    | 1.20E-06    | 106192878      | 106206532    | 24     | 0.612                                                           | <b>5.00E-04</b>   | 0.7028                                                                  | <b>&lt;0.0001</b> |
| V1                                         | SBP                                         | rs2004776  | t       | 1q42  | 228915325 | AGT       | AGT;COG2;CAPN9    | AGT            | 4.45E-07    | 4.63E-08    | 228903667      | 228916422    | 76     | <b>0.0061</b>                                                   | 0.9914            | <b>4.00E-04</b>                                                         | 1                 |
| V1                                         | SBP                                         | rs4766578  | a       | 12q24 | 110388754 | ATXN2     | SH2B3;ATXN2       | ATXN2          | 2.82E-09    | 1.18E-09    | 110368991      | 110556807    | 201    | <b>&lt;0.0001</b>                                               | 0.7427            | <b>&lt;0.0001</b>                                                       | 0.7695            |
| V1                                         | SBP                                         | rs11072518 | t       | 15q24 | 73021663  | NA        | COX5A;SCAMP5;RP   | COX5A          | 6.54E-09    | 2.93E-11    | 72820453       | 73029208     | 90     | <b>&lt;0.0001</b>                                               | 0.7609            | <b>&lt;0.0001</b>                                                       | 0.8024            |
| V1                                         | SBP                                         | rs6092743  | a       | 20q13 | 57133765  | NA        | NA                | C20orf174      | 2.25E-08    | 2.18E-09    | 57112829       | 57194118     | 67     | <b>1.00E-04</b>                                                 | 0.9868            | <b>&lt;0.0001</b>                                                       | 0.9975            |
| V1                                         | DBP                                         | rs2004776  | t       | 1q42  | 228915325 | AGT       | AGT;COG2;CAPN9    | AGT            | 3.20E-08    | 1.53E-08    | 228915325      | 228915982    | 50     | <b>0.0057</b>                                                   | 0.9252            | <b>0.001</b>                                                            | 0.9622            |
| V1                                         | DBP                                         | rs12258967 | c       | 10p12 | 18767965  | CACNB2    | CACNB2            | CACNB2         | 2.48E-09    | 3.71E-09    | 18747454       | 18780638     | 51     | <b>0.0195</b>                                                   | 0.7355            | <b>0.0048</b>                                                           | 0.7591            |
| V1                                         | DBP                                         | rs1133323  | t       | 15q24 | 72999278  | NA        | COX5A;MPI;SCAMP2  | COX5A          | 2.66E-09    | 4.89E-10    | 72806502       | 73029208     | 109    | <b>&lt;0.0001</b>                                               | 0.3275            | <b>&lt;0.0001</b>                                                       | 0.2717            |
| V1                                         | DBP                                         | rs6092743  | a       | 20q13 | 57133765  | NA        | NA                | C20orf174      | 1.11E-08    | 3.37E-11    | 57108080       | 57194118     | 71     | <b>&lt;0.0001</b>                                               | 0.7041            | <b>&lt;0.0001</b>                                                       | 0.7368            |
| V1                                         | MAP                                         | rs2004776  | t       | 1q42  | 228915325 | AGT       | AGT;COG2;CAPN9    | AGT            | 1.18E-08    | 2.45E-09    | 228882807      | 228929783    | 105    | <b>0.0336</b>                                                   | 0.9726            | <b>0.0078</b>                                                           | 0.9898            |
| V1                                         | MAP                                         | rs12258967 | c       | 10p12 | 18767965  | CACNB2    | CACNB2            | CACNB2         | 4.98E-11    | 5.57E-10    | 18726458       | 18780638     | 91     | 0.0843                                                          | 0.4946            | <b>0.0355</b>                                                           | 0.4722            |
| V1                                         | MAP                                         | rs11072518 | t       | 15q24 | 73021663  | NA        | COX5A;SCAMP5;RP   | COX5A          | 8.95E-11    | 1.86E-12    | 72806502       | 73029208     | 95     | <b>&lt;0.0001</b>                                               | 0.5105            | <b>&lt;0.0001</b>                                                       | 0.4795            |
| Mixed effect                               | DBP                                         | rs12244842 | t       | 10q21 | 63109192  | C10orf107 | C10orf107         | C10orf107      | 7.05E-09    | 6.15E-08    | 63109192       | 63221779     | 158    | <b>0.0348</b>                                                   | <b>&lt;0.0001</b> | <b>0.0101</b>                                                           | <b>&lt;0.0001</b> |
| Mixed effect                               | MAP                                         | rs2166122  | t       | 10q21 | 63193080  | C10orf107 | C10orf107         | C10orf107      | 1.88E-09    | 4.76E-08    | 63109192       | 63221779     | 142    | 0.0565                                                          | <b>&lt;0.0001</b> | <b>0.0184</b>                                                           | <b>&lt;0.0001</b> |
| Mixed effect                               | MAP                                         | rs3184504  | t       | 12q24 | 110368991 | SH2B3     | SH2B3;ATXN2       | SH2B3          | 1.68E-12    | 3.71E-10    | 110368991      | 111390798    | 316    | <b>&lt;0.0001</b>                                               | 0.06              | <b>&lt;0.0001</b>                                                       | <b>0.0192</b>     |
| Mixed effect                               | MAP                                         | rs6092743  | a       | 20q13 | 57133765  | NA        | NA                | C20orf174      | 3.60E-10    | 1.12E-11    | 57108080       | 57194118     | 73     | <b>&lt;0.0001</b>                                               | 0.0924            | <b>&lt;0.0001</b>                                                       | <b>0.0439</b>     |
| Mixed effect                               | PP                                          | rs7650227  | t       | 3p22  | 41769941  | ULK4      | ULK4              | ULK4           | 2.84E-09    | 4.38E-06    | 41725264       | 42040009     | 201    | <b>0.0042</b>                                                   | <b>&lt;0.0001</b> | <b>8.00E-04</b>                                                         | <b>&lt;0.0001</b> |
| No difference                              | SBP                                         | rs880315   | t       | 1p36  | 10719453  | CASZ1     | CASZ1             | CASZ1          | 7.98E-12    | 7.20E-09    | 10713384       | 10724576     | 9      | 0.8669                                                          | 0.2722            | 0.9464                                                                  | 0.3158            |
| No difference                              | SBP                                         | rs12258967 | c       | 10p12 | 18767965  | CACNB2    | CACNB2            | CACNB2         | 4.53E-10    | 1.53E-08    | 18726458       | 18780638     | 91     | 0.9551                                                          | 0.2148            | 0.9822                                                                  | 0.1264            |
| No difference                              | SBP                                         | rs2681472  | a       | 12q21 | 88533090  | ATP2B1    | ATP2B1            | ATP2B1         | 1.04E-14    | 1.69E-11    | 88465680       | 88637201     | 132    | 0.1781                                                          | 0.2263            | 0.1116                                                                  | 0.1561            |
| No difference                              | SBP                                         | rs35444    | a       | 12q24 | 114036820 | NA        | NA                | TBX3           | 1.47E-08    | 2.63E-06    | 114036820      | 114039913    | 14     | 0.7564                                                          | 0.3222            | 0.7963                                                                  | 0.2573            |
| No difference                              | DBP                                         | rs7599598  | a       | 2q11  | 96715567  | NA        | FLJ10081;FER1L5;L | FER1L5         | 2.91E-08    | 6.54E-08    | 96715567       | rs7599598    | 1      | 1                                                               | 0.4993            | 1                                                                       | 0.5046            |
| No difference                              | DBP                                         | rs1801253  | c       | 10q25 | 115795046 | ADRB1     | ADRB1             | ADRB1          | 7.22E-06    | 2.58E-08    | 115782052      | 115795046    | 9      | 0.1765                                                          | 0.8999            | 0.112                                                                   | 0.9477            |
| No difference                              | DBP                                         | rs2681472  | a       | 12q21 | 88533090  | ATP2B1    | ATP2B1            | ATP2B1         | 4.01E-13    | 8.68E-11    | 88465680       | 88637201     | 132    | 0.1105                                                          | 0.3348            | 0.0576                                                                  | 0.2681            |
| No difference                              | MAP                                         | rs1801253  | c       | 10q25 | 115795046 | ADRB1     | ADRB1             | ADRB1          | 7.32E-07    | 7.10E-09    | 115779365      | 115795046    | 9      | 0.1665                                                          | 0.8955            | 0.1032                                                                  | 0.9494            |
| No difference                              | MAP                                         | rs35444    | a       | 12q24 | 114036820 | NA        | NA                | TBX3           | 3.20E-08    | 8.38E-07    | 114036820      | 114039913    | 14     | 0.7605                                                          | 0.3228            | 0.7945                                                                  | 0.2617            |
| No difference                              | PP                                          | rs880315   | t       | 1p36  | 10719453  | CASZ1     | CASZ1             | CASZ1          | 5.45E-09    | 3.31E-06    | 10713384       | 10722164     | 6      | 0.8323                                                          | 0.1492            | 0.8929                                                                  | 0.1943            |
| No difference                              | PP                                          | rs12631867 | a       | 3p24  | 30437485  | NA        | NA                | TGFBR2         | 0.023903474 | 9.25E-10    | 30437485       | rs12631867   | 1      | 0.5002                                                          | 1                 | 0.5043                                                                  | 1                 |

## **SUPPLEMENTAL COHORT DESCRIPTIONS**

### **Cohort Descriptions**

#### **Discovery cohorts**

The CHARGE Consortium<sup>1</sup> includes cohort studies that completed genome-wide genotyping and had extensive data on multiple phenotypes including blood pressure. Each study adopted collaboration guidelines and established a consensus on phenotype harmonization, covariate selection and an analytical plan for within-study genome-wide association and prospective meta-analysis of results across studies. Each study received institutional review board approval of its consent procedures, examination and surveillance components, data security measures, and DNA collection and its use for genetic research. All participants provided written informed consent.

In the current analysis, most of the participating cohorts were general population samples (AGES, ARIC, CHS, FHS, RS, MESA, CARDIA). Demographic information, blood pressure, height, and weight were directly measured in all participants, except for the Women's Genome Health Study as described. All studies with GWAS data used hidden Markov model approaches<sup>2-4</sup> and HapMap reference panels<sup>5</sup> to impute genotypes at unmeasured SNPs and excluded SNPs, so that a common set of ~2.5M HapMap SNPs were available across the discovery samples<sup>4,6</sup>. All studies with GWAS data used hidden Markov model approaches<sup>1-3</sup> and HapMap reference panels<sup>4</sup> to impute genotypes at unmeasured SNPs and excluded SNPs, so that a common set of ~2.5M HapMap SNPs were available across the discovery samples<sup>4,6</sup>.

#### **AGES Reykjavik**

The Age Gene/Environment Susceptibility-Reykjavik (AGES- Reykjavik) Study cohort originally comprised a random sample of 30,795 men and women born in 1907-1935 and living in Reykjavik in 1967. A total of 19,381 people attended, resulting in 71% recruitment rate. The study sample was divided into six groups by birth year and birth date within month. One group was designated for longitudinal follow up and was examined in all stages. One group was designated a control group and was not included in examinations until 1991. Other groups were invited to participate in specific stages of the study. Between 2002 and 2006, the AGES-Reykjavik study re-examined 5764 survivors of the original cohort who had participated before in the Reykjavik Study.<sup>7</sup> The midlife data blood pressure measurement was taken from stage 3 of the Reykjavik Study (1974-1979), if available. Half of the cohort attended during this period. Otherwise an observation was selected closest in time to the stage 3 visit. Participants came in a fasting state to the clinic. The supine blood pressure was measured twice by a nurse using a mercury sphygmomanometer after a 5-min rest. Blood pressure was measured according to World Health Organization recommendations. Individuals with previous MI were excluded from the analyses (n=12). Successful genotyping was available for 3219 AGES participants who were eligible for this study. The AGES Reykjavik Study GWAS was approved by the National Bioethics Committee and the Data Protection Authority.

#### **ARIC**

The Atherosclerosis Risk In Communities Study (ARIC) study is a population-based prospective cohort study of cardiovascular disease sponsored by National Heart, Lung, and Blood Institute (NHLBI). ARIC included 15,792 individuals aged 45-64 years at baseline (1987-89), chosen by

probability sampling from four US communities<sup>8</sup> Cohort members completed four clinic examinations, conducted three years apart between 1987 and 1998. The data used in this study are from all four visits. A detailed study protocol is available on the ARIC study website (<http://www.csc.unc.edu/aric>). Clinic examinations included assessment of cardiovascular disease risk factors, a detailed medical and psychosocial history, and measurement of various clinical and laboratory variables. The physical examination included measurements of weight and height from which the body mass index (BMI) was calculated. Blood pressure was measured using a standardized Hawksley random-zero mercury column sphygmomanometer with participants in sitting position after a resting period of 5 minutes. The size of the cuff was chosen according to the arm circumference. For the first three visits, three sequential recordings for systolic and diastolic blood pressure were obtained and the mean of the last two measurements used in this analysis. At the fourth visit, two blood pressure measurements were taken and averaged. Blood pressure lowering medication use was recorded from the medication history. Outliers (>4SD from the mean) with respect to the systolic or diastolic blood pressure distribution were excluded from the analysis. For this investigation we limited the sample to individuals of European descent by self-report and in whom GWAS was carried out.

### **CARDIA**

The Coronary Artery Risk Development in Young Adults (CARDIA) is a prospective multicenter study with 5115 adults Caucasian and African American participants of the age group 18-30 years, recruited from four centers at the baseline examination in 1985-1986. The recruitment was done from the total community in Birmingham, AL, from selected census tracts in Chicago, IL and Minneapolis, MN; and from the Kaiser Permanente health plan membership in Oakland, CA. The details of the study design for the CARDIA study have been previously published.<sup>17</sup> Eight examinations have been completed since initiation of the study, respectively in the years 0, 2, 5, 7, 10, 15, 20 and 25. Written informed consent was obtained from participants at each examination and all study protocols were approved by the institutional review boards of the participating institutions. At each examination, systolic and diastolic blood pressure was measured in triplicate on the right arm using a random-zero sphygmomanometer with the participant seated and following a 5-min. rest. The average of the second and third measurements was taken as the blood pressure value. Blood pressure medication use was obtained by questionnaire. Blood pressure data measured at year 7 through year 20 were used in this study. In addition, the sample was restricted to individuals of European descent by self-report and principal component analysis using genome-wide genotypes.

### **CHS**

The CHS is a population-based cohort study of risk factors for cardiovascular disease in adults 65 years of age or older conducted across four field centers. The original predominantly white cohort of 5201 persons was recruited in 1989-1990 from random samples of the Medicare eligibility lists and an additional 687 African-Americans were enrolled in 1992-93 for a total sample of 5888. Details of the study design are summarized elsewhere<sup>9</sup>. A total of 1908 persons were excluded from the study sample due to prevalent coronary heart disease (n=1195), congestive heart failure (n=86), peripheral vascular disease (n=93), valvular heart disease (n=20), stroke (n=166) or transient ischemic attack (n=56). Participants with missing BMI (n=10) or BP measurements (n=8) were excluded. CHS participants completed standardized clinical examinations and questionnaires at study baseline and at nine annual follow-up visits. Research staff who received central training in blood pressure measurement assessed repeat right-arm seated systolic and diastolic blood pressure levels at baseline with a



Hawksley random-zero sphygmomanometer. Means of the repeated blood pressure measurements from the baseline examination were used for GWAS analyses. Because the other cohorts were predominantly white, African American participants were excluded from this analysis. 3,159 CHS subjects contributed to this analysis.

## **FHS**

The Framingham Heart Study (FHS) began in 1948 with the recruitment of an original cohort of 5,209 men and women who were 28 to 62 years of age (mean age 44 years; 55 percent women) at entry. In 1971 enrollment of a second generation of study participants took place; this cohort consisted of 5,124 children and spouses of children of the original cohort. The mean age of the offspring cohort was 37 years; 52 percent were women. A third generation cohort The FHS began in 1948 with the recruitment of an original cohort of 5,209 men and women who were 28 to 62 years of age (mean age 44 years; 55 percent women) at entry. In 1971 enrollment of a second generation of study participants took place; this cohort consisted of 5,124 children and spouses of children of the original cohort. The mean age of the offspring cohort was 37 years; 52 percent were women.<sup>10-12</sup> At each clinic visit, a medical history was obtained with a focus on cardiovascular content, and participants underwent a physical examination including measurement of height and weight from which BMI was calculated. Systolic and diastolic blood pressures were measured twice by a physician on the left arm of the resting and seated participant using a mercury column sphygmomanometer. Pressures were recorded to the nearest even number. The means of two separate systolic and diastolic blood pressure readings at the first clinic examination of each cohort were used for GWAS analyses. For a subset of offspring cohort participants only one measurement was obtained. Individuals under 20 years of age, those who had a myocardial infarction, or congestive heart failure were excluded from the analyses because those conditions may affect blood pressure levels.

## **MESA**

The Multi-Ethnic Study of Atherosclerosis investigation is a population-based study of 6,814 men and women age 45 to 85 years, without clinical cardiovascular disease, recruited from six United States communities (Baltimore, MD; Chicago, IL; Forsyth County, NC; Los Angeles County, CA; northern Manhattan, NY; and St. Paul, MN). The main objective of MESA is to determine the characteristics of subclinical cardiovascular disease and its progression. Sampling and recruitment procedures have been previously described in detail.<sup>15</sup> Adults with symptoms or history of medical or surgical treatment for cardiovascular disease were excluded. During the recruitment process, potential participants were asked about their race/ethnicity. Self-reported ethnicity was used to classify participants into groups.<sup>16</sup> After a 5-minute rest BP was measured three times at 1 minute intervals using a Dinamap PRO 100 automated oscillometric device (Critikon, Tampa, FL) with the subject in seated, and the average of the second and third BP measurements was recorded for each visit. Data from white participants, collected at MESA exams 1 through 4, was used in this analysis.

## **Rotterdam Study - RS1, RS2**

The RS is a prospective population-based cohort study comprising 7,983 subjects aged 55 years or older. Participants completed an interview at home and at the research center, where participants were subsequently examined. Baseline data were collected between 1990 and 1993. In 1999, inhabitants who turned 55 years of age or moved into the study district since the start of the study were invited to participate in an extension of the RS (RES) of whom 3011

participated (67% response rate). The rationale and design of the RS have been described in detail elsewhere.<sup>13</sup> At the research center, we obtained two seated blood pressure measurements in the right brachial artery with a random zero sphygmomanometer. The mean of two consecutive measurements was used in association analyses. We excluded participants who were older than 85 years of age and those who had a history myocardial infarction or congestive heart failure, because of the impact of these conditions on blood pressure levels.

## **WGHS**

The Women's Genome Health Study (WGHS)<sup>14</sup> is a prospective cohort of female North American health care professionals representing participants in the Women's Health Study (WHS) trial who provided a blood sample at baseline and consent for blood-based analyses. Participants in the WHS were 45 years or older at enrolment and free of cardiovascular disease, cancer or other major chronic illness. For the primary WHS endpoints of cardiovascular disease, full medical records were obtained for reported endpoints and reviewed by an endpoints committee of physicians unaware of assignment. The current data are derived from 23,294 WGHS participants for whom whole genome genotype information was available at the time of analysis and for whom self-reported European ancestry could be confirmed by multidimensional scaling analysis of 1,443 ancestry informative markers in PLINK v. 1.06. Baseline BP in the WGHS was ascertained by a self-reported questionnaire, an approach which has been validated in the WGHS demographic, namely female health care professionals. Questionnaires recorded systolic blood pressure in 9 categories (<110, 110-119, 120-129, 130-139, 140-149, 150-159, 160-169, 170-179, ≥180 mmHg), and diastolic blood pressure in 7 categories (<65, 65-74, 75-84, 85-89, 90-94, 95-104, ≥105 mmHg). The midpoint of each category was used for analysis. Hypertension was defined as a history of physician-diagnosed HTN and ongoing HTN treatment, or SBP ≥ 140 or DBP ≥ 90 mmHg. To account for treatment effects, 10 and 5 mmHg were added to the measured systolic and diastolic blood pressures respectively, if a participant was taking antihypertensive medication.

## **Replication Cohorts**

The replication cohorts in this analysis were used to test the reproducibility of novel discovered loci which were identified by the use of the LTA method. The replication cohorts all provided single-visit BP traits. All participants provided written informed consent and studies were approved by their local Institutional Review Boards or Research Ethics Committees.

## **Global BP Gen (GBPG)**

Single-visit BP traits were previously analyzed in 17 cohorts, and the results of the meta-analysis have been previously reported.<sup>18</sup> Adjustment was performed for the use of anti-hypertensive medications using similar methods as we used in the discovery analysis. The same covariates were included in the individual cohort analyses, including age, age-squared, body mass index, and gender, as in the LTA discovery analyses.

## **Peking University – University of Michigan Study of Atherosclerosis (PUUMA) Beijing Shijensheng Cohort**

The Peking University – University of Michigan Study of Atherosclerosis (PUUMA) is based upon the enrollment of individuals at two hospitals in the Peking University Health Science

system: PKU First Hospital and PKU Third Hospital. There were several sources of samples, including the cardiac catheterization laboratories of the hospitals and a community-based enrollment in Beijing Shijingsheng district. The single-visit BP analyses reported in this study were based upon the community based enrollment of 5,065 unrelated individuals (confirmed by exome wide genotypes) which represents a population sample of Han Chinese from Beijing. Blood pressure was recorded using the Omron 7100 machine three times at 2-minute interval in a seated position. The average of three readings was used for the analysis. Genotyping was performed using the Illumina Exome Plus chip with additional custom content based upon sequencing of additional individuals of Asian ancestry and candidate SNPs identified in prior BP association studies. QC was performed as described elsewhere (manuscript in preparation). Association analyses were implemented in PLINK, and genomic control was applied to the final association statistics.

## Acknowledgements

### LTA Discovery Cohorts:

**AGES:** Age, Gene/Environment Susceptibility (AGES) Reykjavik Study is funded by NIH contract N01-AG-12100, the NIA Intramural Research Program, Hjartavernd (the Icelandic Heart Association) and the Althingi (the Icelandic Parliament). The study is approved by the Icelandic National Bioethics Committee, VSN: 00-063.

**ARIC:** The Atherosclerosis Risk in Communities (ARIC) Study is carried out as a collaborative study supported by National Heart, Lung, and Blood Institute contracts (HHSN268201100005C, HHSN268201100006C, HHSN268201100007C, HHSN268201100008C, HHSN268201100009C, HHSN268201100010C, HHSN268201100011C, and HHSN268201100012C), R01HL087641, R01HL59367 and R01HL086694; National Human Genome Research Institute contract U01HG004402; and National Institutes of Health contract HHSN268200625226C. The authors thank the staff and participants of the ARIC study for their important contributions. Infrastructure was partly supported by Grant Number UL1RR025005, a component of the National Institutes of Health and NIH Roadmap for Medical Research. The meta-analysis and meta-regression analyses were funded by grant R01 HL086694 from the National Heart, Lung, and Blood Institute.

**CARDIA:** The Coronary Artery Risk Development in Young Adults Study (CARDIA) is conducted and supported by the National Heart, Lung, and Blood Institute in collaboration with the University of Alabama at Birmingham (HHSN268201300025C & HHSN268201300026C), Northwestern University (HHSN268201300027C), University of Minnesota (HHSN268201300028C), Kaiser Foundation Research Institute (HHSN268201300029C), and Johns Hopkins University School of Medicine (HHSN268200900041C). CARDIA is also partially supported by the Intramural Research Program of the National Institute on Aging. This manuscript has been reviewed by CARDIA for scientific content. Genotyping of the CARDIA participants and statistical data analysis was supported by grants U01-HG-004729 from the National Human Genome Research Institute and R01-HL-084099 from the National Heart, Lung and Blood Institute to MF. The authors thank the investigators and staff of the GENEVA coordinating center and genotyping center, as well as the staff and participants of the CARDIA study for their important contributions.

**Cardiovascular Health Study:** This CHS research was supported by NHLBI contracts HHSN268201200036C, HHSN268200800007C, N01HC55222, N01HC85079, N01HC85080, N01HC85081, N01HC85082, N01HC85083, N01HC85086; and NHLBI grants HL080295, HL087652, HL105756 with additional contribution from the National Institute of Neurological Disorders and Stroke (NINDS). Additional support was provided through AG023629 from the National Institute on Aging (NIA). A full list of CHS investigators and institutions can be found at <http://chs-nhlbi.org/>. The provision of genotyping data was supported in part by the National Center for Advancing Translational Sciences, CTSI grant UL1TR000124, and the National Institute of Diabetes and Digestive and Kidney Disease Diabetes Research Center (DRC) grant DK063491 to the Southern California Diabetes Endocrinology Research Center.

**FHS:** The National Heart, Lung, and Blood Institute's Framingham Heart Study (FHS) is a joint project of the National Institutes of Health and Boston University School of Medicine and was supported by the National Heart, Lung, and Blood Institute's Framingham Heart Study (contract No. N01-HC-25195) and its contract with Affymetrix, Inc. for genotyping services (contract No. N02-HL-6-4278). Analyses reflect the efforts and resource development from the Framingham Heart Study investigators participating in

the SNP Health Association Resource (SHARe) project. A portion of this research was conducted using the Linux Cluster for Genetic Analysis (LinGAI) funded by the Robert Dawson Evans Endowment of the Department of Medicine at Boston University School of Medicine and Boston Medical Center.

**MESA:** The Multi-Ethnic Study of Atherosclerosis (MESA) and the MESA SHARe project are conducted and supported by the National Heart, Lung, and Blood Institute (NHLBI) in collaboration with MESA investigators. Support is provided by grants and contracts N01 HC-95159, N01-HC-95160, N01-HC-95161, N01-HC-95162, N01-HC-95163, N01-HC-95164, N01-HC-95165, N01-HC-95166, N01-HC-95167, N01-HC-95168, N01-HC-95169 and RR-024156. Funding for SHARe genotyping was provided by NHLBI Contract N02-HL-6-4278. Genotyping was performed at the Broad Institute of Harvard and MIT (Boston, Massachusetts, USA) and at Affymetrix (Santa Clara, California, USA).

**RS I and RS II:** The GWA database of the Rotterdam Study was funded through the Netherlands Organisation of Scientific Research NWO (nr. 175.010.2005.011). The Rotterdam Study is supported by the Erasmus Medical Center and Erasmus University, Rotterdam; the Netherlands Organization for Scientific Research (NWO), the Netherlands Organization for Health Research and Development (ZonMw), the Research Institute for Diseases in the Elderly (RIDE), the Ministry of Education, Culture and Science, the Ministry for Health, Welfare and Sports, the European Commission (DG XII), and the Municipality of Rotterdam. Abbas Dehghan is supported by NWO grant (veni, 916.12.154) and the EUR Fellowship.

**WGHS:** The WGHS is funded by the Donald W. Reynolds Foundation (Las Vegas, NV), the Fondation LeDucq (Paris, France), the National Heart, Lung and Blood Institute (NHLBI; HL043851) and the National Cancer Institute (NCI; CA047988). Funding for genotyping and collaborative scientific support was provided by Amgen.

#### **Reproducibility studies with single-visit BP traits:**

This work forms part of the research themes contributing to the translational research portfolio for the NIHR Barts Cardiovascular Biomedical Research Unit.

**BHS:** The Busselton Health Study acknowledges the generous support for the 1994/5 follow-up study from Healthway, Western Australia and the numerous Busselton community volunteers who assisted with data collection and the study participants from the Shire of Busselton. The Busselton Health Study is supported by The Great Wine Estates of the Margaret River region of Western Australia. The study gratefully acknowledges the assistance of the Western Australian DNA Bank (NHMRC Enabling Facility) with DNA samples and the support provided by the Ark (NHMRC Enabling Facility) for this study.

**CoLaus:** The CoLaus authors thank Yolande Barreau, Mathieu Firmann, Vladimir Mayor, Anne-Lise Bastian, Binasa Ramic, Martine Moranville, Martine Baumer, Marcy Sagette, Jeanne Ecoffey, and Sylvie Mermoud for data collection. The CoLaus study received financial contributions from GlaxoSmithKline, the Faculty of Biology and Medicine of Lausanne, the Swiss National Science Foundation (33CSO-122661, 3200BO-111361/2, 3100AO-116323/1, 310000-112552), the Swiss School of Public Health Plus, the Giorgi-Cavaglieri Foundation, the European Framework Project 6 (EuroDia, AnEuploidy and Hypergenes projects).

**EPIC-Norfolk:** The EPIC Norfolk study is supported by programme grants from the Medical Research Council, and Cancer Research UK. We acknowledge the contribution of the staff and participants of the EPIC-Norfolk Study.

**Fenland:** The Fenland Study is funded by the Medical Research Council (MC\_U106179471). We are grateful to all the volunteers for their time and help, and to the General Practitioners and practice staff for assistance with recruitment. We thank the Fenland Study Investigators, Fenland Study Co-ordination team and the Epidemiology Field, Data and Laboratory teams.

**KORA S3:** KORA S3 500K blood pressure project was supported by Estonian Ministry of Education and Science core grant no SF0180022s12 (to M.L). The KORA Augsburg studies have been financed by the Helmholtz Zentrum München, German Research Center for Environmental Health, Neuherberg, Germany and supported by grants from the German Federal Ministry of Education and Research (BMBF). The KORA study group consists of H-E. Wichmann (speaker), A. Peters, C. Meisinger, T. Illig, R. Holle, J. John and co-workers who are responsible for the design and conduct of the KORA studies. Part of this work was financed by the German National Genome Research Network (NGFN-2 and NGFNPlus:01GS0823) and supported within the Munich Center of Health Sciences (MC Health) as part of LMUinnovativ.

**LifeLines:** The LifeLines Cohort Study, and generation and management of GWAS genotype data for the LifeLines Cohort Study is supported by the Netherlands Organization of Scientific Research NWO (grant 175.010.2007.006), the Economic Structure Enhancing Fund (FES) of the Dutch government, the Ministry of Economic Affairs, the Ministry of Education, Culture and Science, the Ministry for Health, Welfare and Sports, the Northern Netherlands Collaboration of Provinces (SNN), the Province of Groningen, University Medical Center Groningen, the University of Groningen, Dutch Kidney Foundation and Dutch Diabetes Research Foundation. We thank Behrooz Alizadeh, Annemieke Boesjes, Marcel Bruinenberg, Noortje Festen, Pim van der Harst, Ilja Nolte, Lude Franke, Mitra Valimohammadi for their help in creating the GWAS database, and Rob Bieringa, Joost Keers, René Oostergo, Rosalie Visser, Judith Vonk for their work related to data-collection and validation. The authors are grateful to the study participants, the staff from the LifeLines Cohort Study and Medical Biobank Northern Netherlands, and the participating general practitioners and pharmacists.

**MIGen:** The Myocardial Infarction Genetics Consortium (MIGen) was funded by grant R01 HL087676 (NIH, USA). This work was supported by the European Regional Development Fund (ERDF-FEDER), the Spanish Ministry of Economy and Innovation through the Carlos III Health Institute [CIBER Epidemiología y Salud Pública, Red de Investigación Cardiovascular, Heracles Program RD12/0042, PI09/90506], the Catalan Research and Technology Innovation Interdepartmental Commission [SGR 1195] and Fundació La Marató de TV3 [81810]. GL was funded by the Juan de la Cierva Program, Ministerio de Educación (JCI-2009-04684). Study Concept and Design: David Altshuler, Sekar Kathiresan, Diego Ardissino, Pier M Mannucci, David S Siscovick, Christopher J O'Donnell, Leena Peltonen, Veikko Salomaa, Stephen M Schwartz, Olle Melander; Phenotype Data Acquisition/QC: Stephen M Schwartz; Genotype Data Acquisition/QC: Benjamin F Voight, Shaun Purcell

**NESDA:** The infrastructure for the NESDA study is funded through the Geestkracht programme of the Dutch Scientific Organization (ZON-MW, grant number 10-000-1002) and matching funds from participating universities and mental health care organizations. Genotyping in NESDA was funded by the Genetic Association Information Network (GAIN) of the Foundation for the US National Institutes of Health. Statistical analyses were carried out on the Genetic Cluster Computer

(<http://www.geneticcluster.org>), which is financially supported by the Netherlands Scientific Organization (NWO 480-05-003) along with a supplement from the Dutch Brain Foundation.

**PREVEND:** PREVEND genetics is supported by the Dutch Kidney Foundation (Grant E033), the EU project grant GENECURE (FP-6 LSHM CT 2006 037697), the National Institutes of Health (grant LM010098), The Netherlands organisation for health research and development (NWO VENI grant 916.761.70 & ZonMw grant 90.700.441), and the Dutch Inter University Cardiology Institute Netherlands (ICIN).

**PROCARDIS** was supported by the European Community Sixth Framework Program (LSHM-CT-2007-037273), AstraZeneca, the British Heart Foundation, the Swedish Research Council, the Knut and Alice Wallenberg Foundation, the Swedish Heart-Lung Foundation, the Torsten and Ragnar Söderberg Foundation, the Strategic Cardiovascular Program of Karolinska Institutet and Stockholm County Council, the Foundation for Strategic Research and the Stockholm County Council (560283). MF and HW acknowledge support from the Oxford British Heart Foundation Centre of Research Excellence and a Wellcome Trust core award (075491/Z/04).

**SardiNIA:** The work was supported by the National Institute on Aging, Intramural Research Program.

**SCES, SiMES, SINDI and SP2:** SCES, SiMES, SINDI, and SP2 acknowledge the support of the Yong Loo Lin School of Medicine, the National University Health System and the Life Sciences Institute from the National University of Singapore. The National Medical Research Council provided support through the individual research grant, the clinician scientist award and Singapore translational investigator award schemes. The Biomedical research council in Singapore also provided support through the individual research grant scheme. We also acknowledge the support from the National Research Foundation of Singapore (NRF-RF-2010-05).

**SHIP:** SHIP was funded by grants from the German Federal Ministry of Education and Research (BMBF, Grants 01ZZ0403, 01ZZ0103, 01GI0883), the Ministry for Education, Research and Cultural Affairs as well as the Ministry of Social Affairs of the Federal State of Mecklenburg-West Pomerania. Genome-wide data have been supported by the Federal Ministry of Education and Research (grant no. 03ZIK012) and a joint grant from Siemens Healthcare, Erlangen, Germany and the Federal State of Mecklenburg- West Pomerania. The University of Greifswald is a member of the 'Center of Knowledge Interchange' program of the Siemens AG.

**SUVIMAX:** We thank the Commissariat à l'Energie Atomique, the Université Paris 13, the Conservatoire National des Arts et Métiers, the Institut National de la Recherche Agronomique and the Institut National de la Santé et de la Recherche Médicale for their financial support.

**TRAILS** (TRacking Adolescents' Individual Lives Survey) is a collaborative project involving various departments of the University Medical Center and University of Groningen, the Erasmus University Medical Center Rotterdam, the University of Utrecht, the Radboud Medical Center Nijmegen, and the Parnassia Bavo group, all in the Netherlands. TRAILS has been financially supported by grants from the Netherlands Organization for Scientific Research NWO (Medical Research Council program grant GB-MW 940-38-011; ZonMw Brainpower grant 100-001-004; ZonMw Risk Behavior and Dependence grants 60-60600-98-018 and 60-60600-97-118; ZonMw Culture and Health grant 261-98-710; Social Sciences Council medium-sized investment grants GB-MaGW 480-01-006 and GB-MaGW 480-07-001; Social

Sciences Council project grants GB-MaGW 457-03-018, GB-MaGW 452-04-314, and GB-MaGW 452-06-004; NWO large-sized investment grant 175.010.2003.005; NWO Longitudinal Survey and Panel Funding 481-08-013); the Sophia Foundation for Medical Research (projects 301 and 393), the Dutch Ministry of Justice (WODC), the European Science Foundation (EuroSTRESS project FP-006), and the participating universities. We are grateful to all adolescents, their parents and teachers who participated in this research and to everyone who worked on this project and made it possible. Statistical analyses were carried out on the Genetic Cluster Computer (<http://www.geneticcluster.org>), which is financially supported by the Netherlands Scientific Organization (NWO 480-05-003) along with a supplement from the Dutch Brain Foundation.

**YFS:** The Young Finns Study has been financially supported by the Academy of Finland: grants 134309 (Eye), 126925, 121584, 124282, 129378 (Salve), 117787 (Gendi), and 41071 (Skidi), the Social Insurance Institution of Finland, Kuopio, Tampere and Turku University Hospital Medical Funds (grant 9M048 and 9N035 for TeLeht), Juho Vainio Foundation, Paavo Nurmi Foundation, Finnish Foundation of Cardiovascular Research and Finnish Cultural Foundation, Tampere Tuberculosis Foundation and Emil Aaltonen Foundation (T.L). The expert technical assistance in the statistical analyses by Ville Aalto and Irina Lisinen is gratefully acknowledged.

**The Peking University-University of Michigan Study of Atherosclerosis (PUUMA)** is funded by the University of Michigan Health System and Peking University Health Science Center Joint Institute for Translational and Clinical Research. Dr. Ganesh was supported, in part, by NHLBI P30HL101290.



## Supplemental References

1. Psaty, B.M. *et al.* Cohorts for Heart and Aging Research in Genomic Epidemiology (CHARGE) Consortium: Design of prospective meta-analyses of genome-wide association studies from 5 cohorts. *Circ Cardiovasc Genet* **2**, 73-80 (2009).
2. Servin, B. & Stephens, M. Imputation-based analysis of association studies: candidate regions and quantitative traits. *PLoS Genet* **3**, e114 (2007).
3. Marchini, J. & Howie, B. Genotype imputation for genome-wide association studies. *Nat Rev Genet* **11**, 499-511.
4. Li, Y., Willer, C., Sanna, S. & Abecasis, G. Genotype imputation. *Annu Rev Genomics Hum Genet* **10**, 387-406 (2009).
5. International HapMap, C. The International HapMap Project. *Nature* **426**, 789-96 (2003).
6. Guan, Y. & Stephens, M. Practical issues in imputation-based association mapping. *PLoS Genet* **4**, e1000279 (2008).
7. Harris, T.B. *et al.* Age, Gene/Environment Susceptibility-Reykjavik Study: multidisciplinary applied phenomics. *Am J Epidemiol* **165**, 1076-87 (2007).
8. The Atherosclerosis Risk in Communities (ARIC) Study: design and objectives. The ARIC investigators. *Am J Epidemiol* **129**, 687-702 (1989).
9. Fried, L.P. *et al.* The Cardiovascular Health Study: design and rationale. *Ann Epidemiol* **1**, 263-76 (1991).
10. Dawber, T.R., Meadors, G.F. & Moore, F.E., Jr. Epidemiological approaches to heart disease: the Framingham Study. *Am J Public Health Nations Health* **41**, 279-81 (1951).
11. Feinleib, M., Kannel, W.B., Garrison, R.J., McNamara, P.M. & Castelli, W.P. The Framingham Offspring Study. Design and preliminary data. *Prev Med* **4**, 518-25 (1975).
12. Splansky, G.L. *et al.* The Third Generation Cohort of the National Heart, Lung, and Blood Institute's Framingham Heart Study: design, recruitment, and initial examination. *Am J Epidemiol* **165**, 1328-35 (2007).
13. Hofman, A. *et al.* The Rotterdam Study: objectives and design update. *Eur J Epidemiol* **22**, 819-29 (2007).
14. Ridker, P.M. *et al.* Rationale, design, and methodology of the Women's Genome Health Study: a genome-wide association study of more than 25,000 initially healthy american women. *Clin Chem* **54**, 249-55 (2008).
15. Kramer, H. *et al.* Racial/ethnic differences in hypertension and hypertension treatment and control in the multi-ethnic study of atherosclerosis (MESA). *Am J Hypertens* **17**, 963-70 (2004).
16. Bild, D.E. *et al.* Multi-ethnic study of atherosclerosis: objectives and design. *Am J Epidemiol* **156**, 871-81 (2002).
17. Friedman, G.D. *et al.* CARDIA: study design, recruitment, and some characteristics of the examined subjects. *J Clin Epidemiol* **41**, 1105-16 (1988).
18. Newton-Cheh, C. *et al.* Genome-wide association study identifies eight loci associated with blood pressure. *Nat Genet* (2009).
19. Johnson, A.D. *et al.* SNAP: a web-based tool for identification and annotation of proxy SNPs using HapMap. *Bioinformatics*. **24**, 2938-2939 (2008).
20. Goring, H.H. *et al.* Discovery of expression QTLs using large-scale transcriptional profiling in human lymphocytes. *Nat. Genet.* **39**, 1208-1216 (2007).
21. Idaghdour, Y. *et al.* Geographical genomics of human leukocyte gene expression variation in southern Morocco. *Nat Genet* **42**, 62-67.

22. Heap, G.A. *et al.* Complex nature of SNP genotype effects on gene expression in primary human leucocytes. *BMC Med Genomics* **2**, 1 (2009).
23. The Genotype-Tissue Expression (GTEx) project. *Nat.Genet.* **45**, 580-585 (2013).
24. Battle, A. *et al.* Characterizing the genetic basis of transcriptome diversity through RNA-sequencing of 922 individuals. *Genome Res.* **24**, 14-24 (2014).
25. Benton, M.C. *et al.* Mapping eQTLs in the Norfolk Island genetic isolate identifies candidate genes for CVD risk traits. *Am.J.Hum.Genet.* **93**, 1087-1099 (2013).
26. Emilsson, V. *et al.* Genetics of gene expression and its effect on disease. *Nature* **452**, 423-428 (2008).
27. Fehrmann, R.S. *et al.* Trans-eQTLs reveal that independent genetic variants associated with a complex phenotype converge on intermediate genes, with a major role for the HLA. *PLoS Genet* **7**, e1002197.
28. Landmark-Hoyvik, H. *et al.* Genome-wide association study in breast cancer survivors reveals SNPs associated with gene expression of genes belonging to MHC class I and II. *Genomics* **102**, 278-287 (2013).
29. Mehta, D. *et al.* Impact of common regulatory single-nucleotide variants on gene expression profiles in whole blood. *Eur.J.Hum.Genet.* **21**, 48-54 (2013).
30. Sasayama, D. *et al.* Identification of single nucleotide polymorphisms regulating peripheral blood mRNA expression with genome-wide significance: an eQTL study in the Japanese population. *PLoS.One.* **8**, e54967 (2013).
31. van Eijk, K.R. *et al.* Genetic analysis of DNA methylation and gene expression levels in whole blood of healthy human subjects. *BMC.Genomics* **13**, 636 (2012).
32. Westra, H.J. *et al.* Systematic identification of trans eQTLs as putative drivers of known disease associations. *Nat.Genet.* **45**, 1238-1243 (2013).
33. Zhernakova, D.V. *et al.* DeepSAGE Reveals Genetic Variants Associated with Alternative Polyadenylation and Expression of Coding and Non-coding Transcripts. *PLoS.Genet.* **9**, e1003594 (2013).
34. Dixon, A.L. *et al.* A genome-wide association study of global gene expression. *Nat Genet* **39**, 1202-1207 (2007).
35. Liang, L. *et al.* A cross-platform analysis of 14,177 expression quantitative trait loci derived from lymphoblastoid cell lines. *Genome Res.* (2013).
36. Stranger, B.E. *et al.* Patterns of cis regulatory variation in diverse human populations. *PLoS Genet.* **8**, e1002639 (2012).
37. Kwan, T. *et al.* Genome-wide analysis of transcript isoform variation in humans. *Nat.Genet.* **40**, 225-231 (2008).
38. Cusanovich, D.A. *et al.* The combination of a genome-wide association study of lymphocyte count and analysis of gene expression data reveals novel asthma candidate genes. *Hum.Mol.Genet.* **21**, 2111-2123 (2012).
39. Dimas, A.S. *et al.* Common regulatory variation impacts gene expression in a cell type-dependent manner. *Science* **325**, 1246-1250 (2009).
40. Grundberg, E. *et al.* Mapping cis- and trans-regulatory effects across multiple tissues in twins. *Nat.Genet.* **44**, 1084-1089 (2012).
41. Gutierrez-Arcelus, M. *et al.* Passive and active DNA methylation and the interplay with genetic variation in gene regulation. *Elife.* **2**, e00523 (2013).
42. Mangravite, L.M. *et al.* A statin-dependent QTL for GATM expression is associated with statin-induced myopathy. *Nature* **502**, 377-380 (2013).
43. Fairfax, B.P. *et al.* Genetics of gene expression in primary immune cells identifies cell type-specific master regulators and roles of HLA alleles. *Nat.Genet.* **44**, 502-510 (2012).

44. Murphy, A. *et al.* Mapping of numerous disease-associated expression polymorphisms in primary peripheral blood CD4+ lymphocytes. *Hum Mol Genet* **19**, 4745-4757.
45. Heinzen, E.L. *et al.* Tissue-specific genetic control of splicing: implications for the study of complex traits. *PLoS Biol* **6**, e1 (2008).
46. Zeller, T. *et al.* Genetics and beyond--the transcriptome of human monocytes and disease susceptibility. *PLoS One* **5**, e10693.
47. Barreiro, L.B. *et al.* Deciphering the genetic architecture of variation in the immune response to Mycobacterium tuberculosis infection. *Proc.Natl.Acad.Sci.U.S.A* **109**, 1204-1209 (2012).
48. Huang, R.S. *et al.* Population differences in microRNA expression and biological implications. *RNA.Biol.* **8**, 692-701 (2011).
49. Degner, J.F. *et al.* DNase I sensitivity QTLs are a major determinant of human expression variation. *Nature* **482**, 390-394 (2012).
50. Greenawalt, D.M. *et al.* A survey of the genetics of stomach, liver, and adipose gene expression from a morbidly obese cohort. *Genome Res* **21**, 1008-1016.
51. Kompass, K.S. & Witte, J.S. Co-regulatory expression quantitative trait loci mapping: method and application to endometrial cancer. *BMC.Med.Genomics* **4**, 6 (2011).
52. Li, Q. *et al.* Integrative eQTL-based analyses reveal the biology of breast cancer risk loci. *Cell* **152**, 633-641 (2013).
53. Webster, J.A. *et al.* Genetic control of human brain transcript expression in Alzheimer disease. *Am J Hum Genet* **84**, 445-458 (2009).
54. Zou, F. *et al.* Brain expression genome-wide association study (eGWAS) identifies human disease-associated variants. *PLoS Genet* **8**, e1002707.
55. Colantuoni, C. *et al.* Temporal dynamics and genetic control of transcription in the human prefrontal cortex. *Nature* **478**, 519-523.
56. Kim, S., Cho, H., Lee, D. & Webster, M.J. Association between SNPs and gene expression in multiple regions of the human brain. *Transl.Psychiatry* **2**, e113 (2012).
57. Liu, C. *et al.* Whole-genome association mapping of gene expression in the human prefrontal cortex. *Mol Psychiatry* **15**, 779-784.
58. Gamazon, E.R. *et al.* Enrichment of cis-regulatory gene expression SNPs and methylation quantitative trait loci among bipolar disorder susceptibility variants. *Mol.Psychiatry* **18**, 340-346 (2013).
59. Gibbs, J.R. *et al.* Abundant quantitative trait loci exist for DNA methylation and gene expression in human brain. *PLoS Genet* **6**, e1000952.
60. Zhang, B. *et al.* Integrated systems approach identifies genetic nodes and networks in late-onset Alzheimer's disease. *Cell* **153**, 707-720 (2013).
61. Innocenti, F. *et al.* Identification, replication, and functional fine-mapping of expression quantitative trait loci in primary human liver tissue. *PLoS Genet* **7**, e1002078.
62. Schadt, E.E. *et al.* Mapping the genetic architecture of gene expression in human liver. *PLoS Biol* **6**, e107 (2008).
63. Schroder, A. *et al.* Genomics of ADME gene expression: mapping expression quantitative trait loci relevant for absorption, distribution, metabolism and excretion of drugs in human liver. *Pharmacogenomics.J.* **13**, 12-20 (2013).
64. Grundberg, E. *et al.* Population genomics in a disease targeted primary cell model. *Genome Res.* **19**, 1942-1952 (2009).
65. Kabakchiev, B. & Silverberg, M.S. Expression quantitative trait loci analysis identifies associations between genotype and gene expression in human intestine. *Gastroenterology* **144**, 1488-96, 1496 (2013).

66. Keildson, S. *et al.* Skeletal Muscle Expression of Phosphofructokinase is Influenced by Genetic Variation and Associated with Insulin Sensitivity. *Diabetes* (2013).
67. Quigley, D.A. *et al.* The 5p12 breast cancer susceptibility locus affects MRPS30 expression in estrogen-receptor positive tumors. *Mol.Oncol.* (2013).
68. Gao, C. *et al.* HEFT: eQTL analysis of many thousands of expressed genes while simultaneously controlling for hidden factors. *Bioinformatics.* (2013).
69. Hao, K. *et al.* Lung eQTLs to help reveal the molecular underpinnings of asthma. *PLoS.Genet.* **8**, e1003029 (2012).
70. Ding, J. *et al.* Gene expression in skin and lymphoblastoid cells: Refined statistical method reveals extensive overlap in cis-eQTL signals. *Am.J.Hum.Genet.* **87**, 779-789 (2010).
71. Qiu, W. *et al.* Genetics of sputum gene expression in chronic obstructive pulmonary disease. *PLoS.One.* **6**, e24395 (2011).
72. Lin, H. *et al.* Gene expression and genetic variation in human atria. *Heart Rhythm.* (2013).
73. Rantalainen, M. *et al.* MicroRNA expression in abdominal and gluteal adipose tissue is associated with mRNA expression levels and partly genetically driven. *PLoS One* **6**, e27338 (2011).

**FIGURE S1: Study design summary.**

The study design of the long-term averaged (LTA) analysis is summarized to accomplish the goals of firstly, identifying novel BP associations, which were replicated in an independent sample, and secondly characterizing the impact of LTA on genetic associations as compared to single-visit (V1) BP associations.

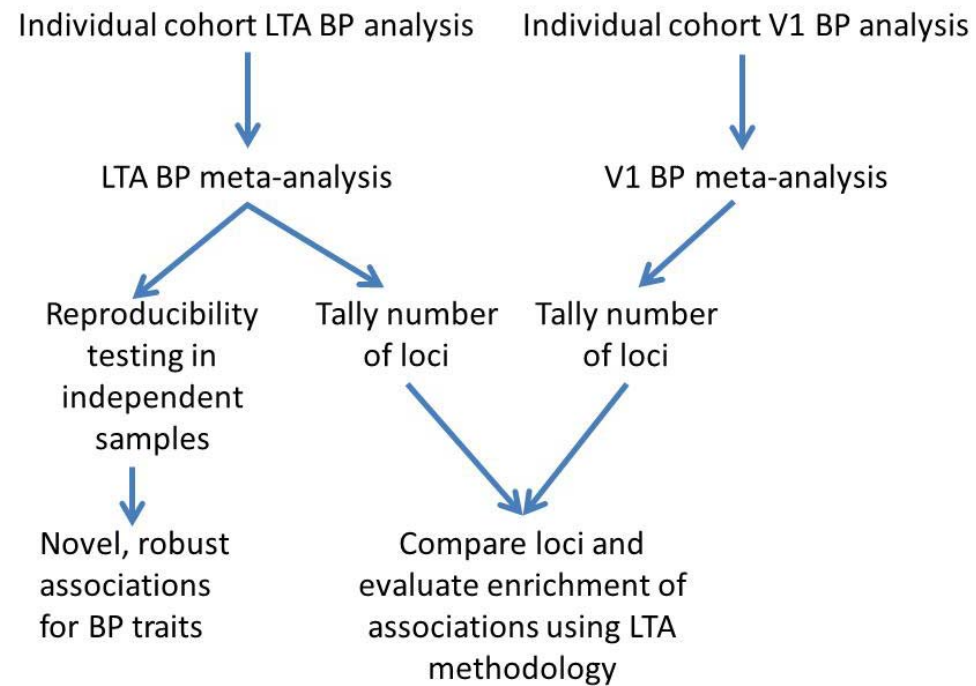

**FIGURE S2. QQ plots for LTA BP traits and single visit (V1) SBP and DBP.**

Quantile-quantile (QQ) plots are shown for (a) LTA and V1 SBP traits, (b) LTA and V1 DBP traits, (c) LTA-MAP and (d) LTA-PP. The null hypothesis is shown as the orange line. The 95% confidence interval around the null is shown in gray.

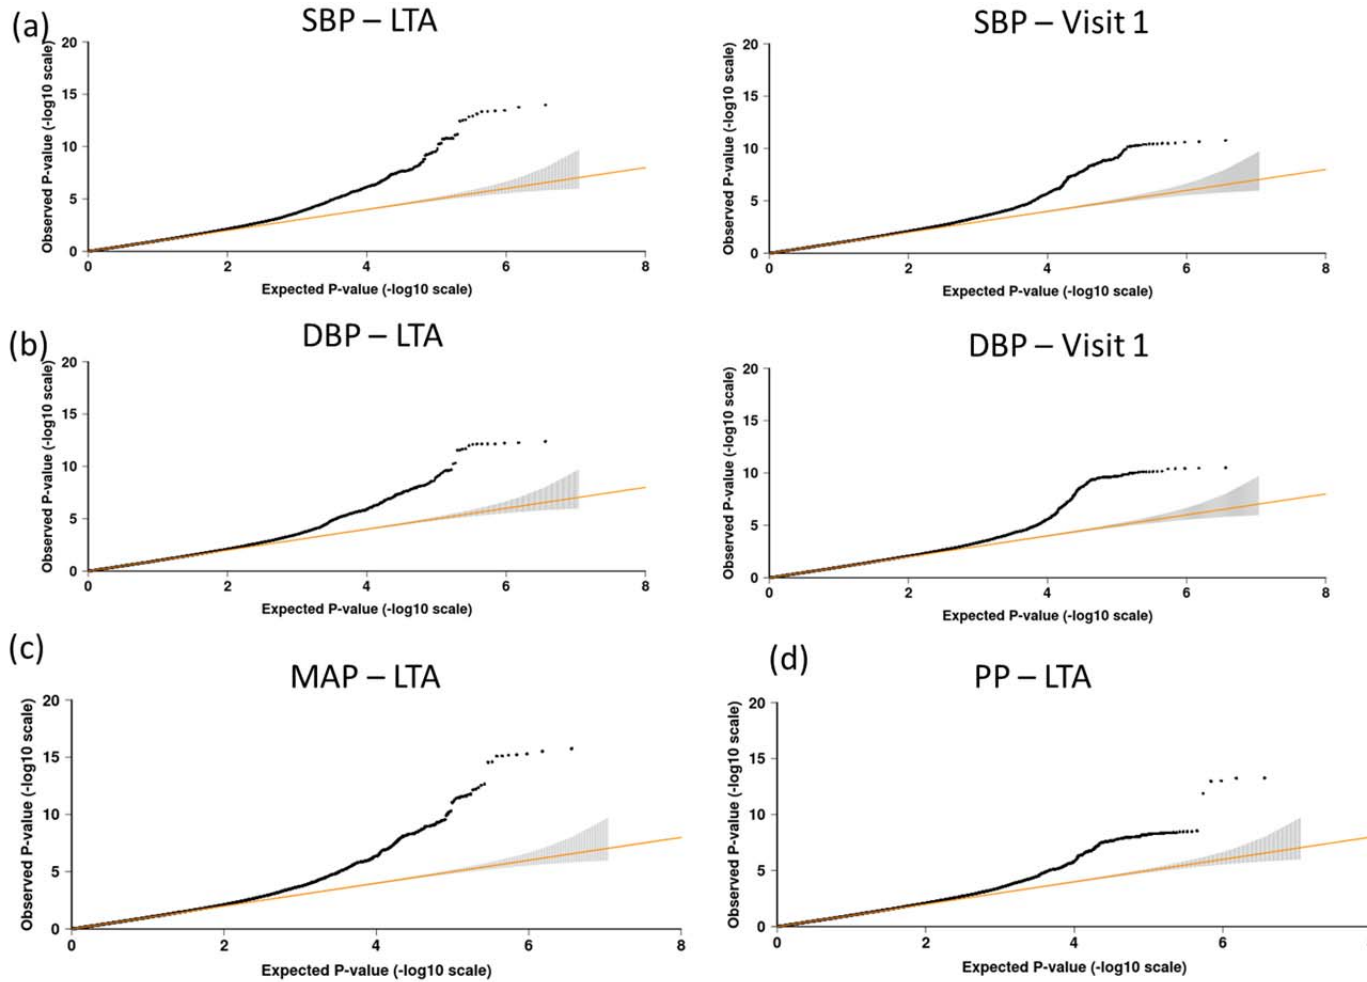

**FIGURE S3. Genome-wide association studies:  $-\log P$  values for (a) LTA-MAP and (b) LTA-PP.**

Genome wide association studies'  $-\log P$  plots are shown for LTA-MAP and LTA-PP traits. Regions with SNP associations reaching  $P$  value  $< 5 \times 10^{-8}$  are shown in red, and regions reaching  $P$  value  $< 5 \times 10^{-7}$  are shown in blue.

**(a) LTA-MAP**

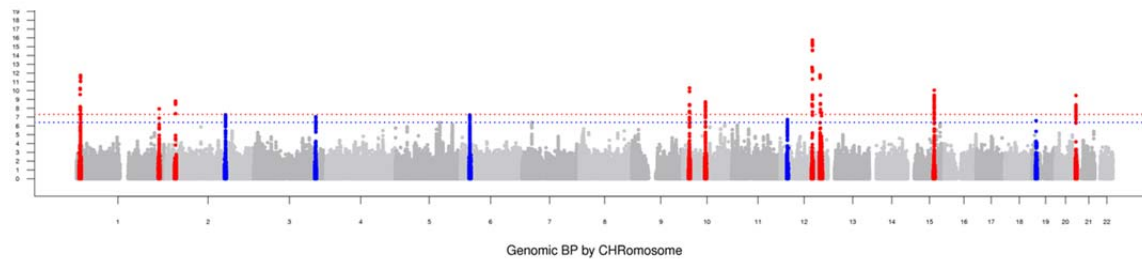

**(b) LTA-PP**

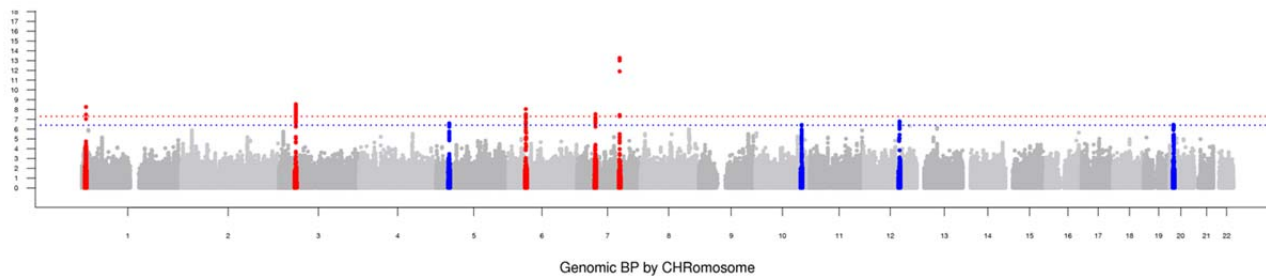

**FIGURE S4. QQ plots for SBP and DBP traits showing associations statistics for both LTA and V1 traits.**

Genome-wide association statistics for SBP and DBP analyses using LTA versus V1 only in quantile-quantile plots of LTA-SBP and LTA-DBP, with corresponding V1-SBP and V1-DBP results. The distribution of  $P$  values is shown with SNPs plotted in blue corresponding to V1 results, and SNPs plotted in green corresponding to LTA analysis results.

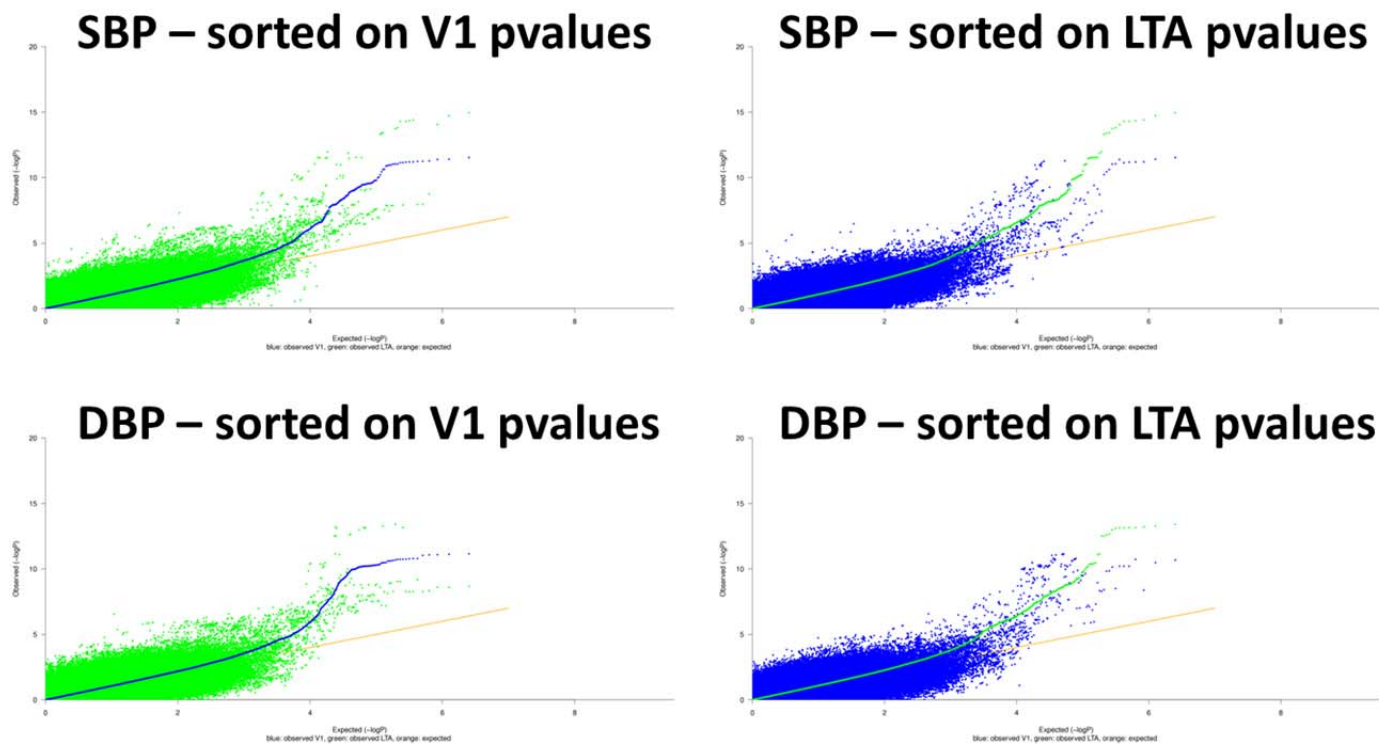



**FIGURE S5. Genome-wide association statistics for SBP and DBP analyses using LTA versus V1.**

Genome-wide association statistics for SBP and DBP analyses using LTA versus V1, with LTA values plotted on the X-axis and V1 on the Y-axis, for the effect size (beta, regression) estimate, standard error, chi-squared values and the normalized regression estimate (beta recalculated as the raw beta divided by the standard deviation of the phenotype).

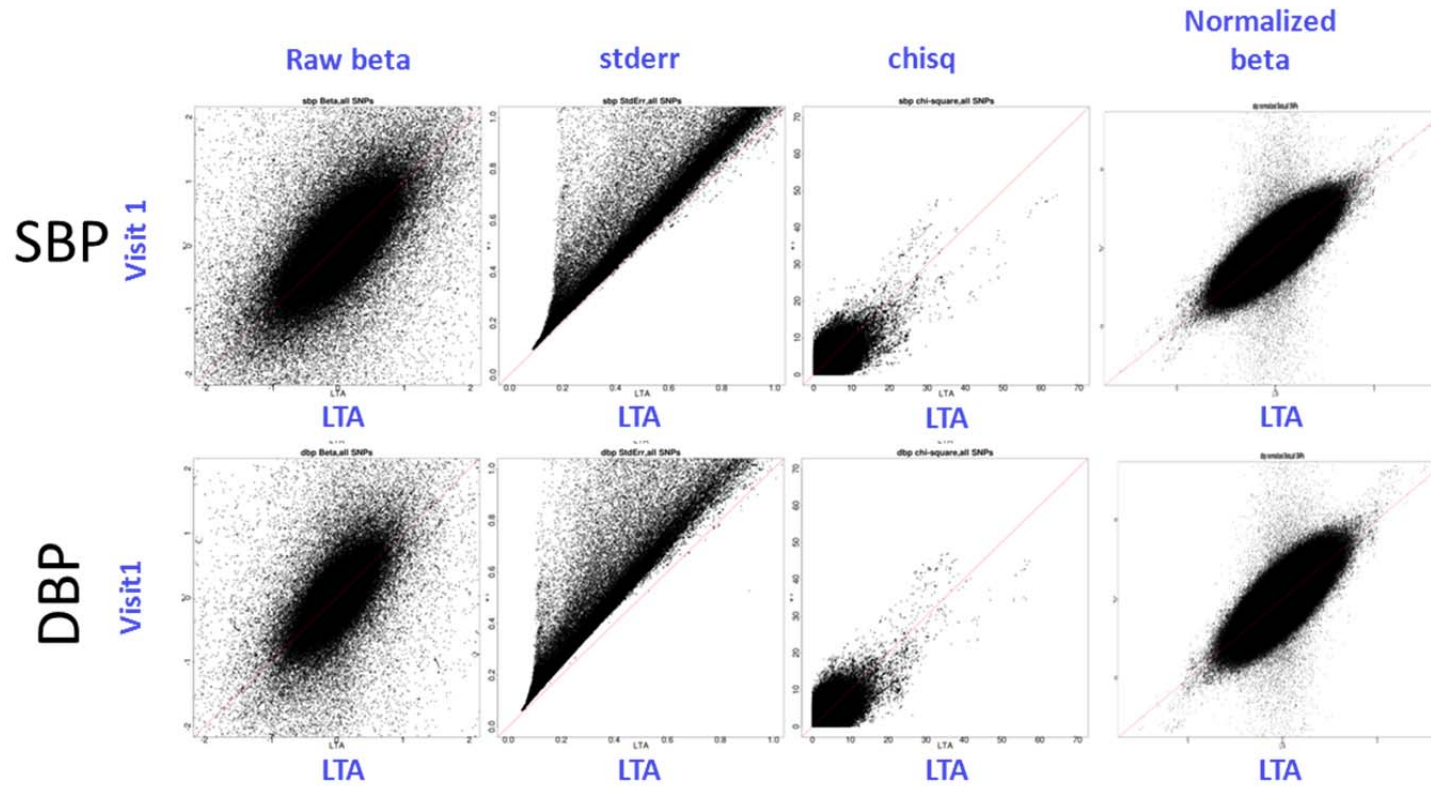

FIGURE S6.  $-\log P$  value plots for regions identified in the LTA analysis incorporating LD estimates and annotation of nonsynonymous SNPs for each of the new 5 SNP-trait associations we identified in the LTA analysis (a-e).

(a)

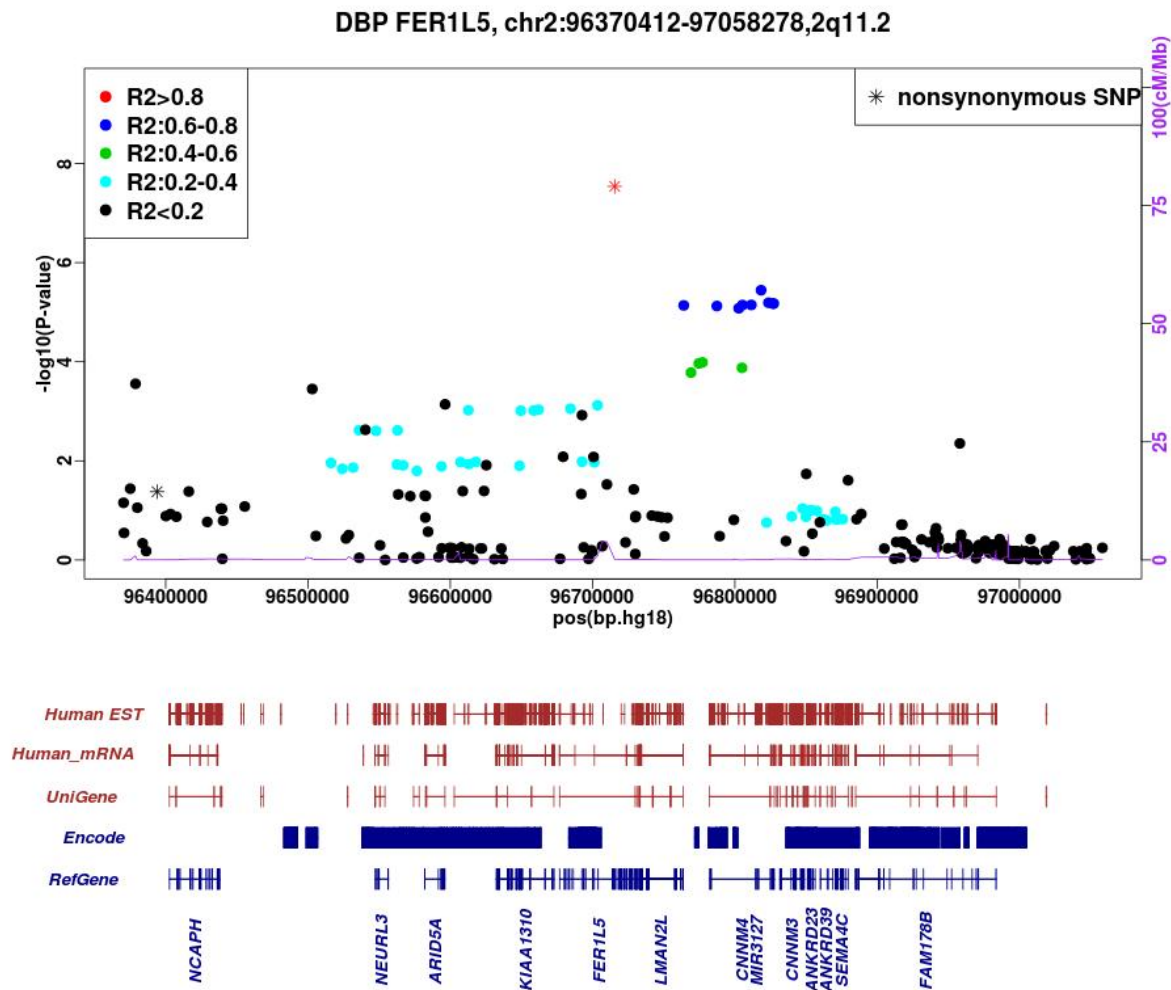

(b)

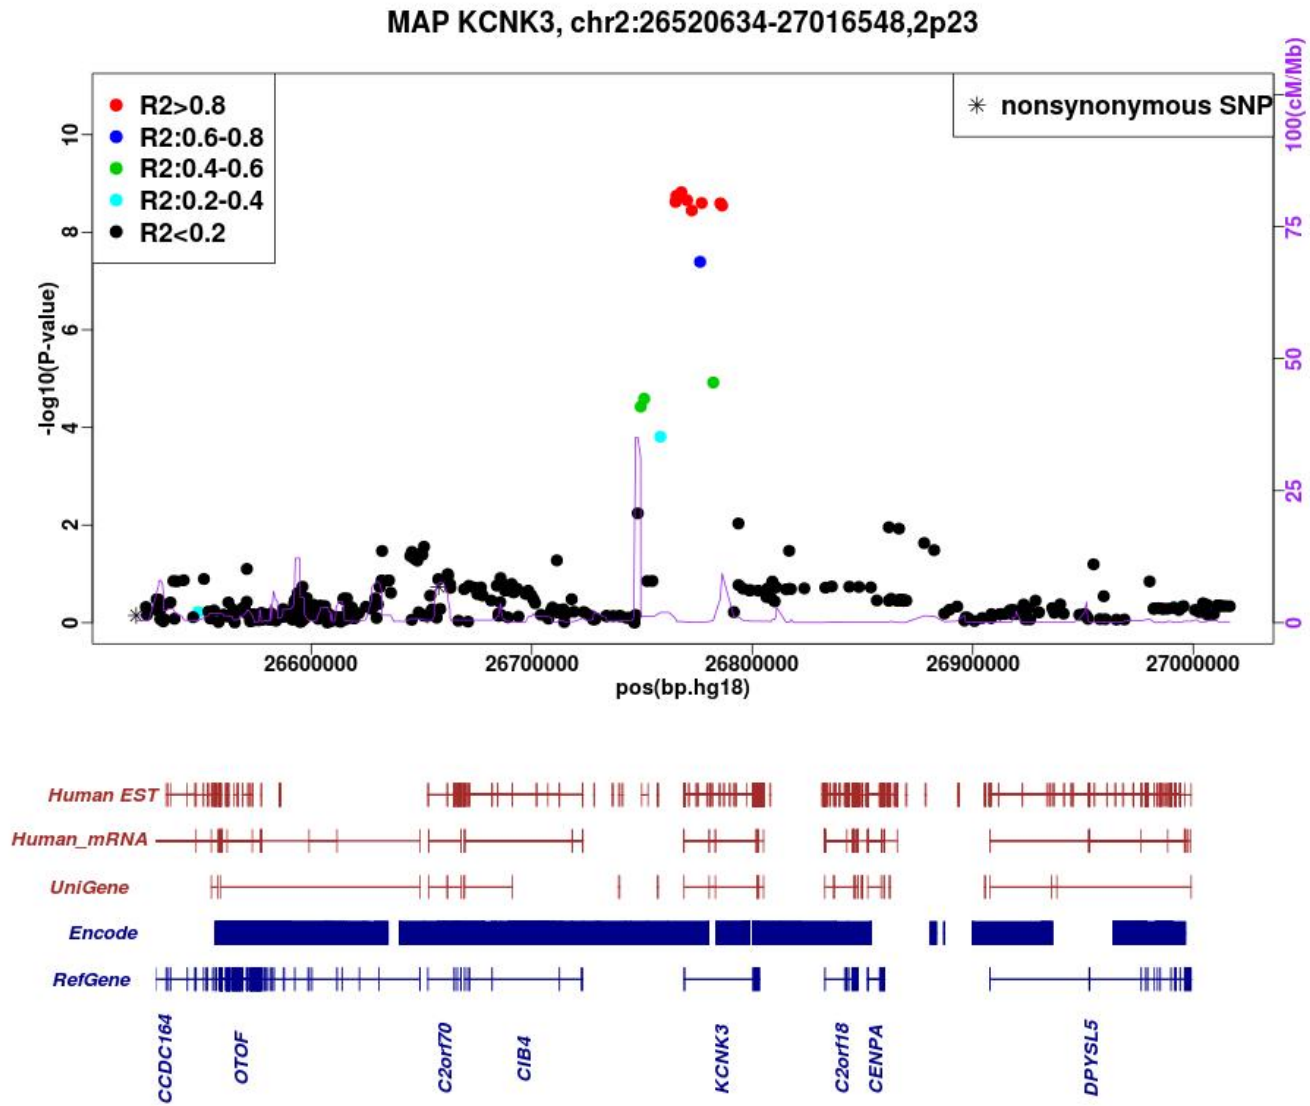

(c)

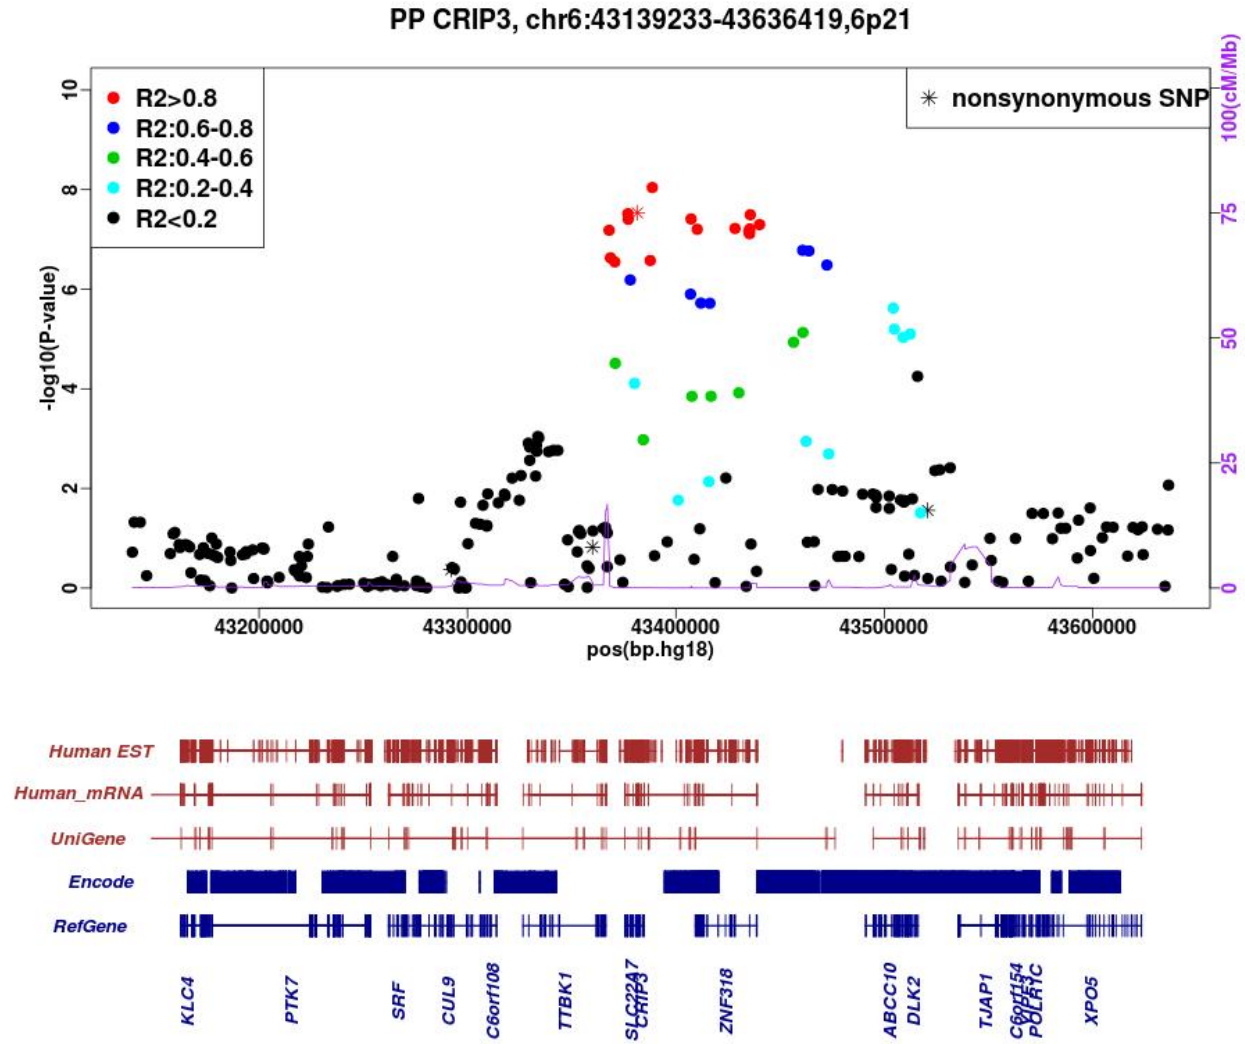

(d)

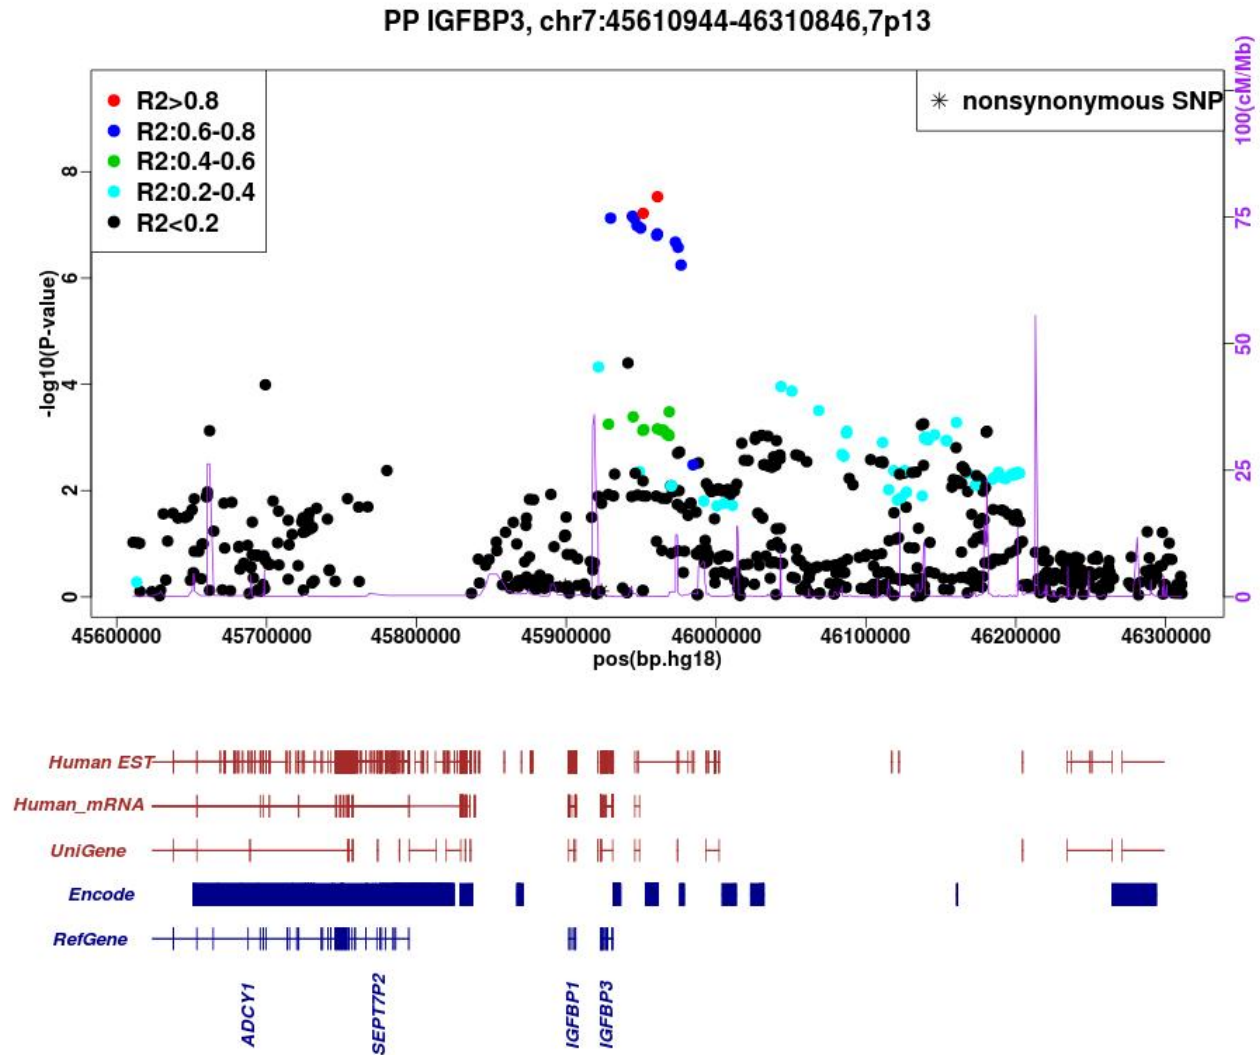

(e)

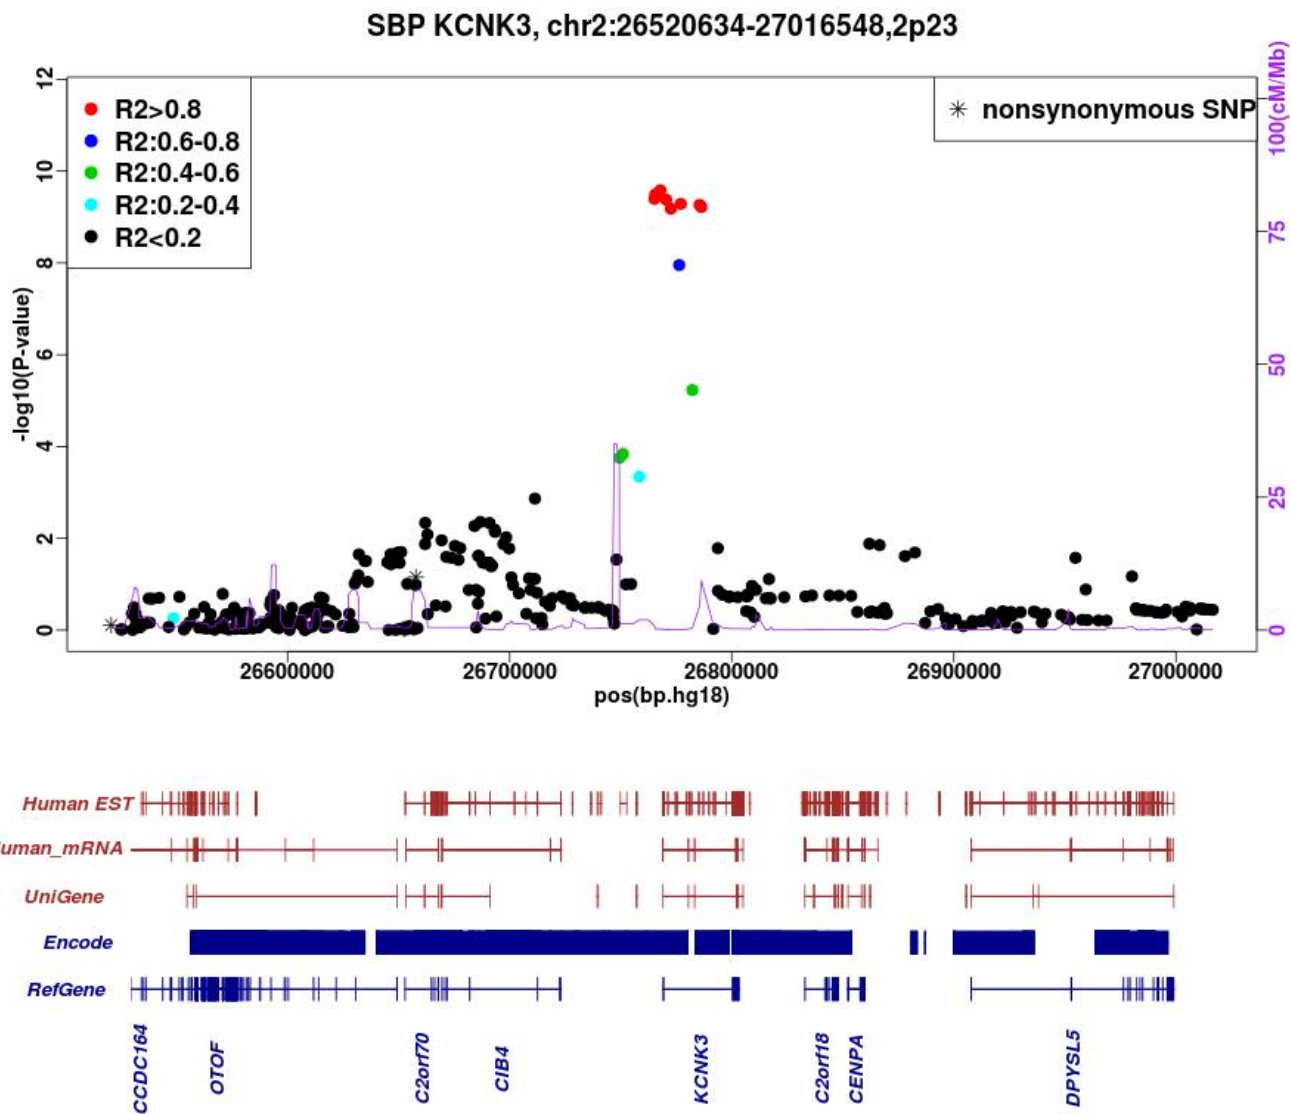

**FIGURE S7.  $-\log P$  value plots for regions identified in the LTA analysis.**

$-\log P$  values of association tests are shown for all regions identified in the LTA analyses for (a) regions with enrichment in the LTA analysis compared to the corresponding V1 analyses (rank test  $P$  value  $< 0.001$ ), (b) regions with enrichment in the V1 analysis compared to the corresponding LTA analyses (rank test  $P$  value  $< 0.001$ ), (c) one region with enrichment of some SNP by LTA and other SNPs by V1 ( $P$  Value  $< 0.001$ ) and (d) regions without enrichment by either LTA or V1 within the locus. The results of the LTA-SBP analysis are plotted in black and the results of the corresponding V1-SBP analysis of the same individuals are plotted in blue.

(a1)

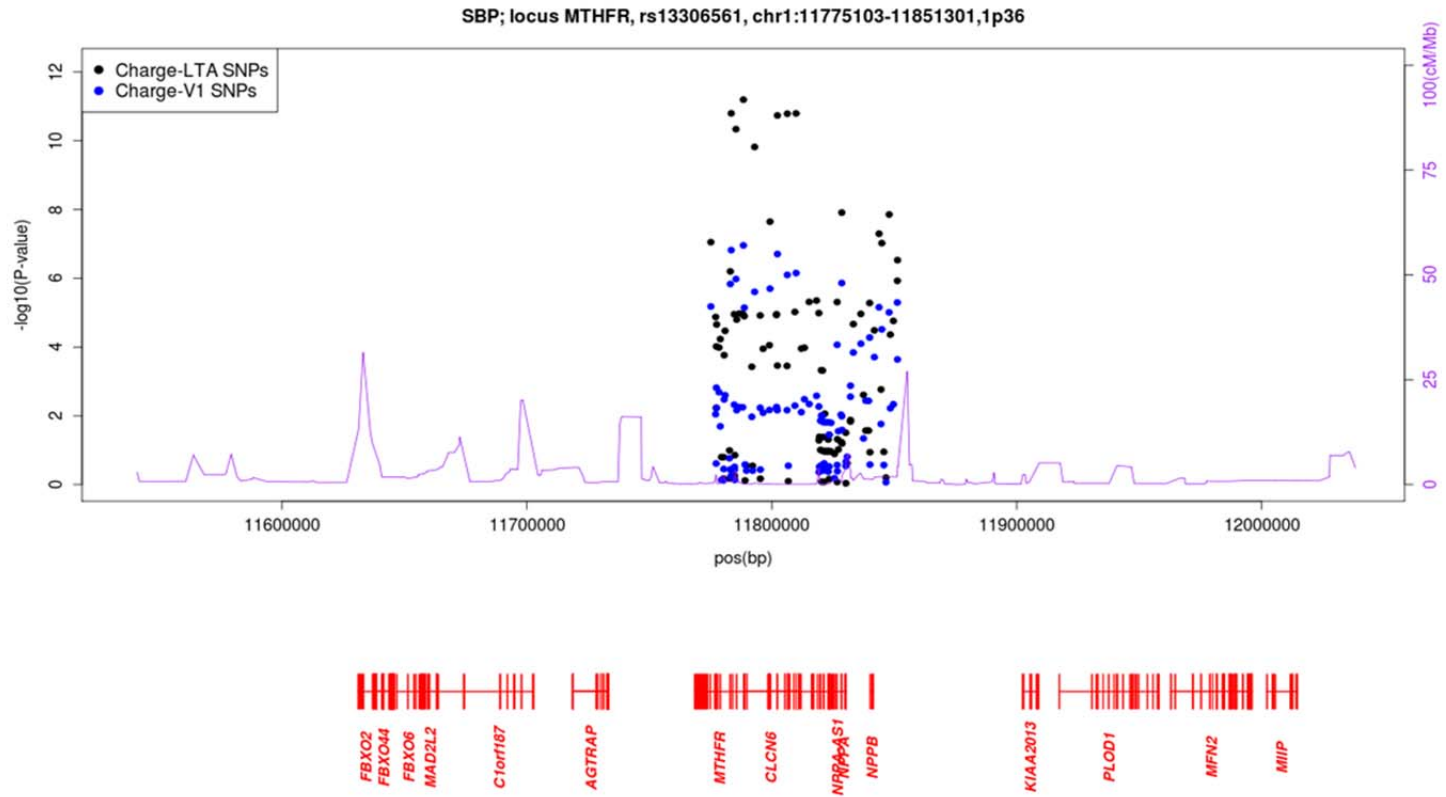



(a2)

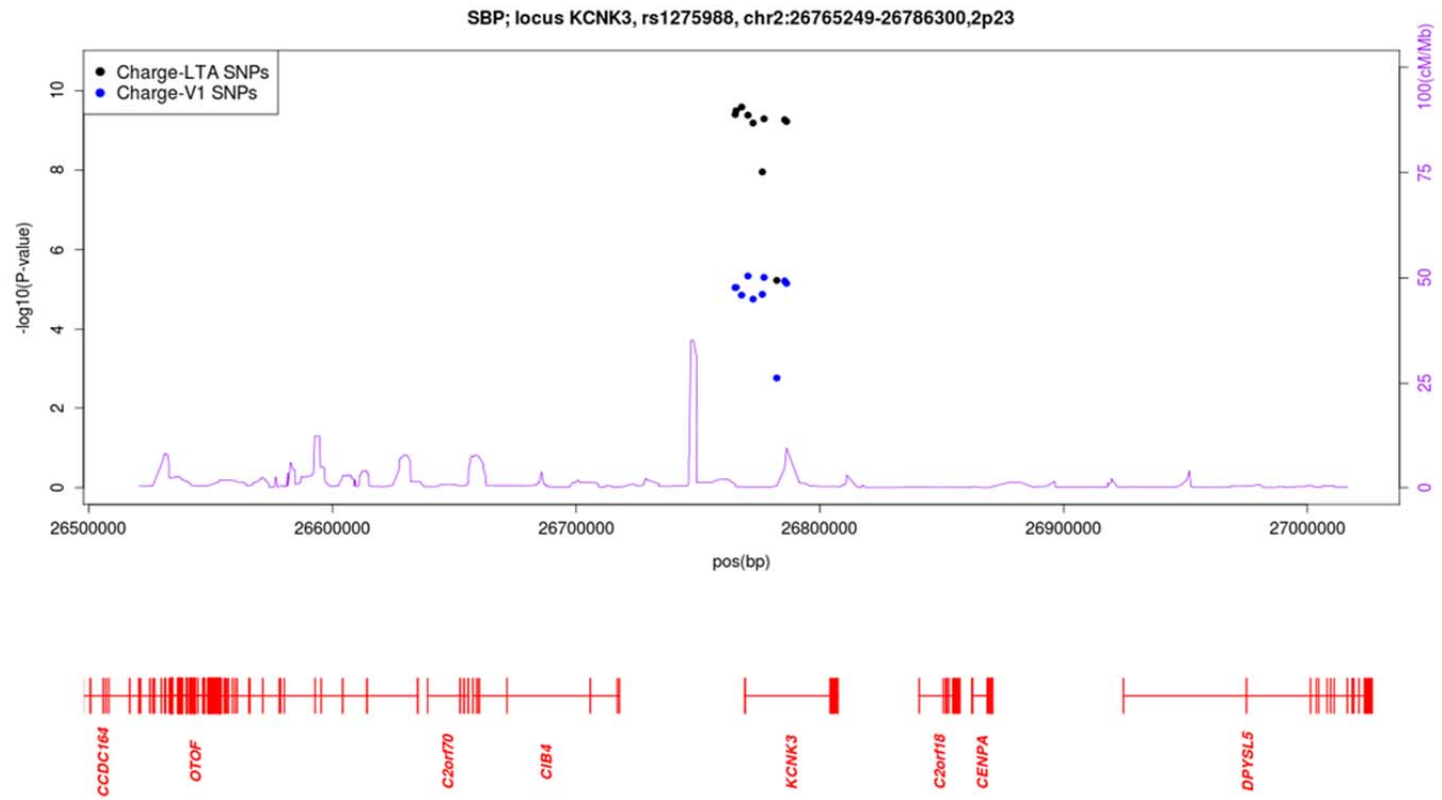

(a3)

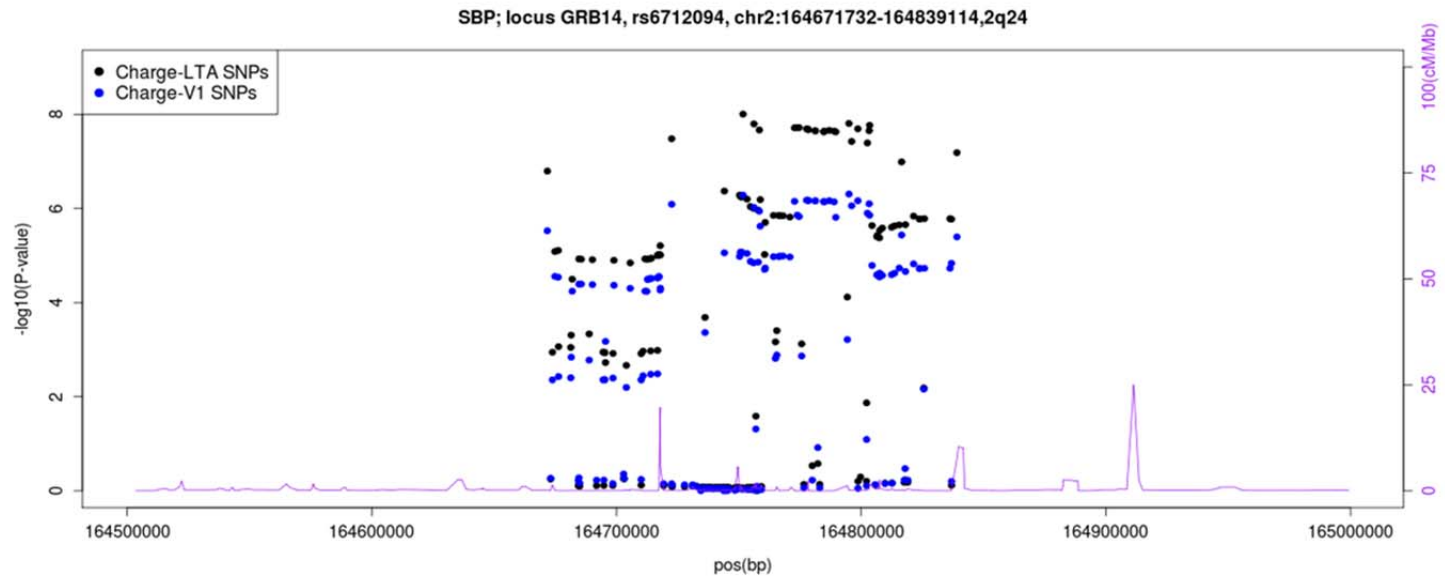

(a4)

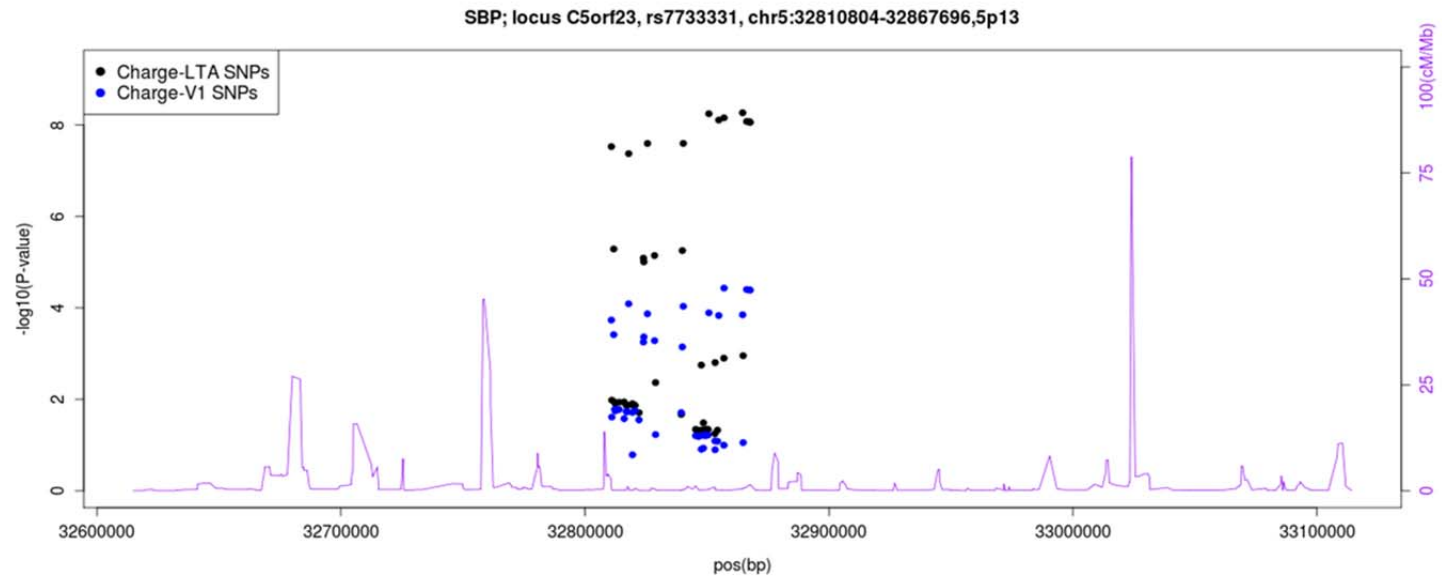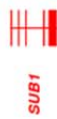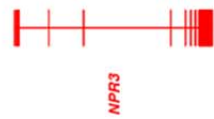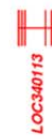

(a5)

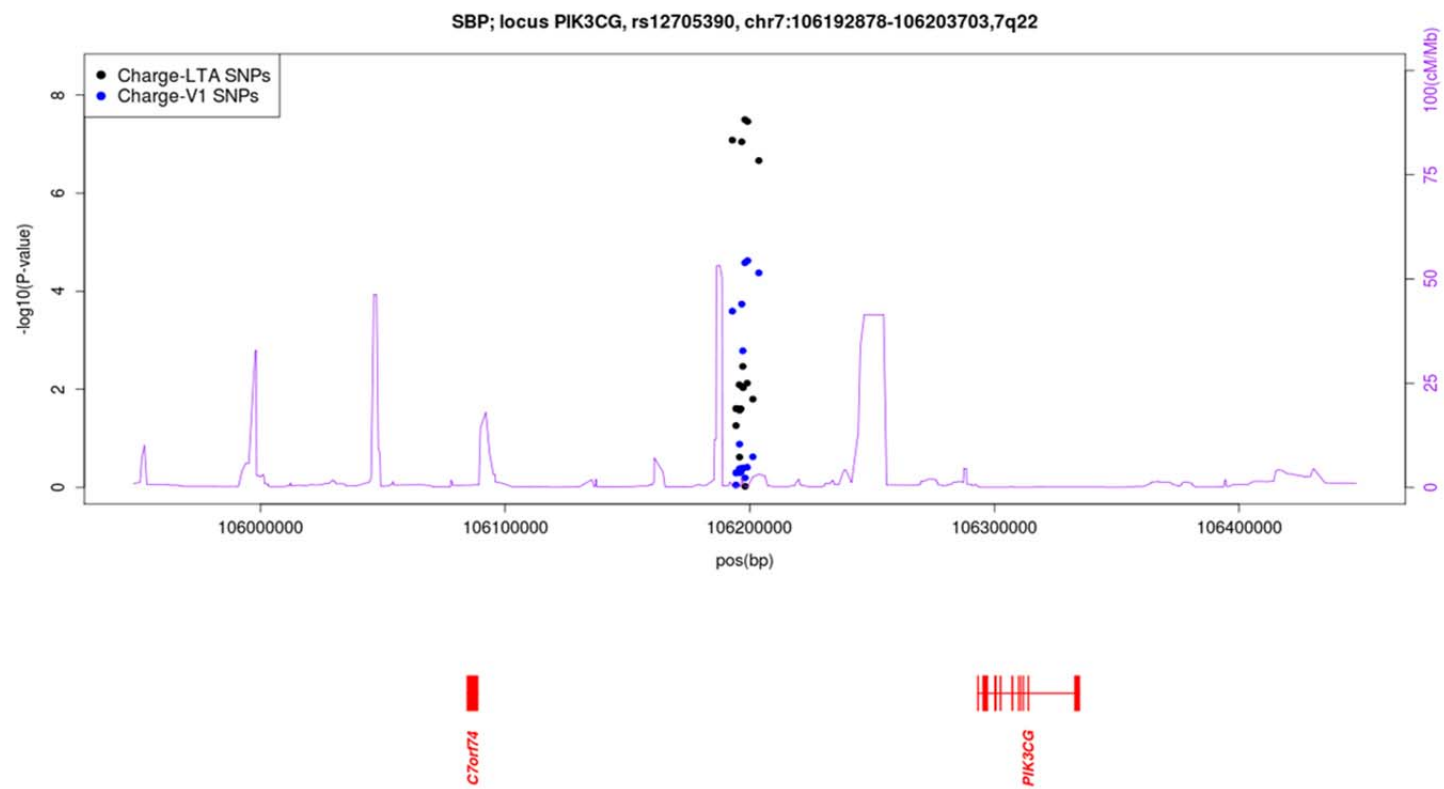

(a6)

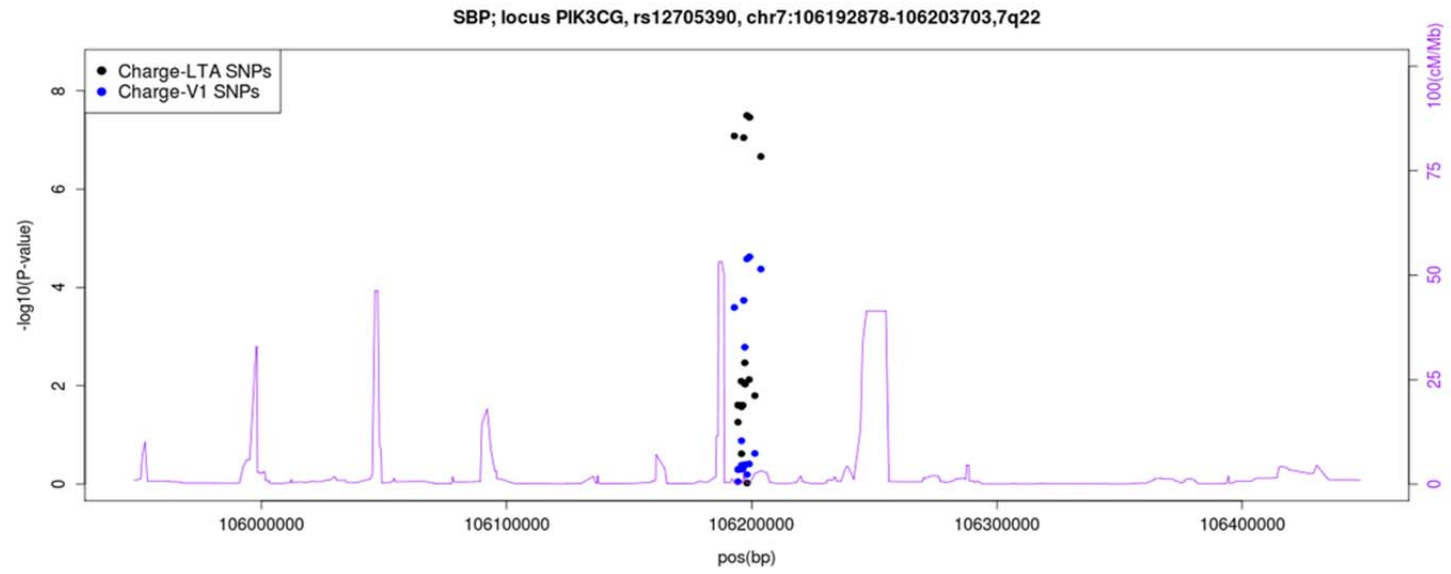

*C7orf74*

*PIK3CG*

(a7)

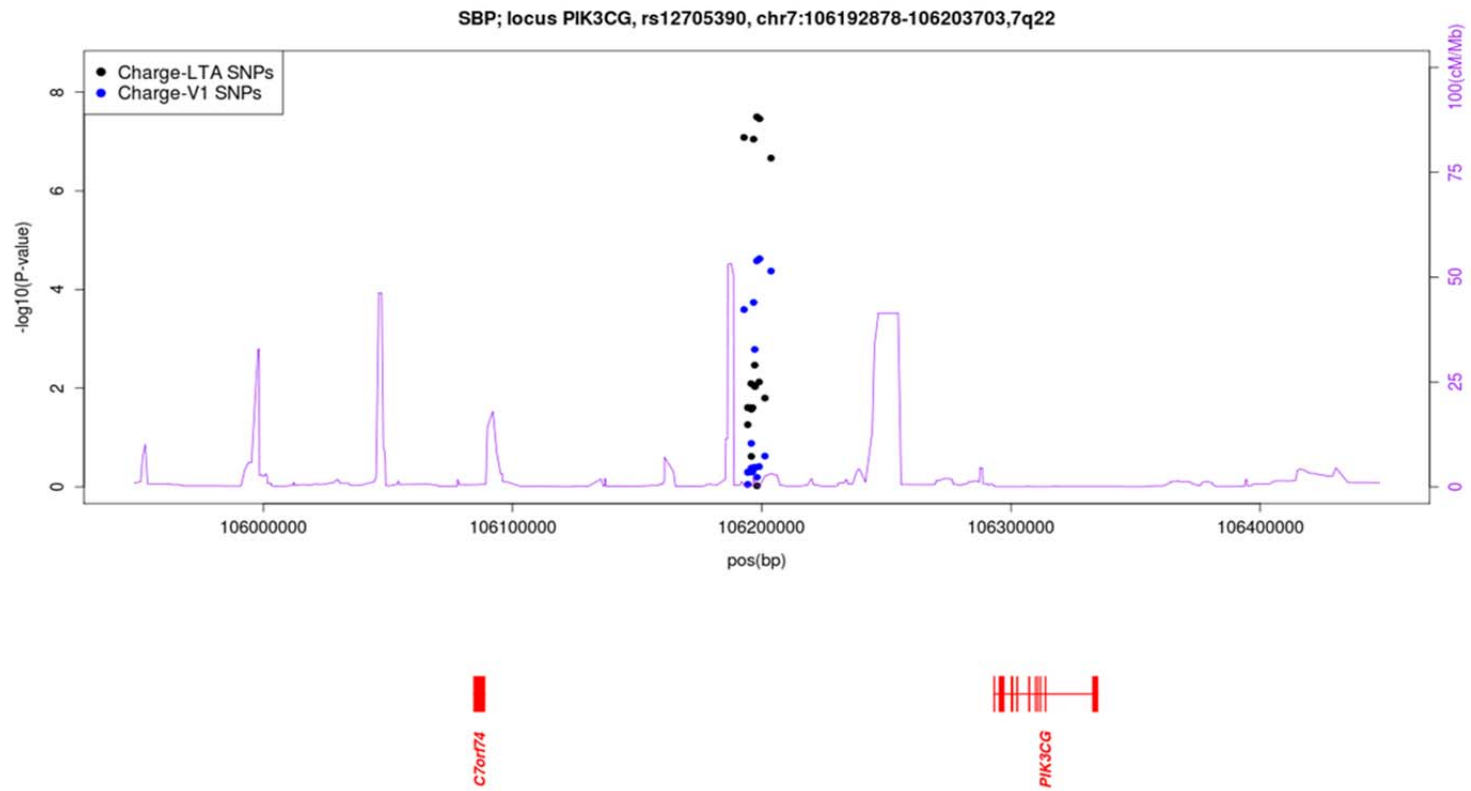

(a8)

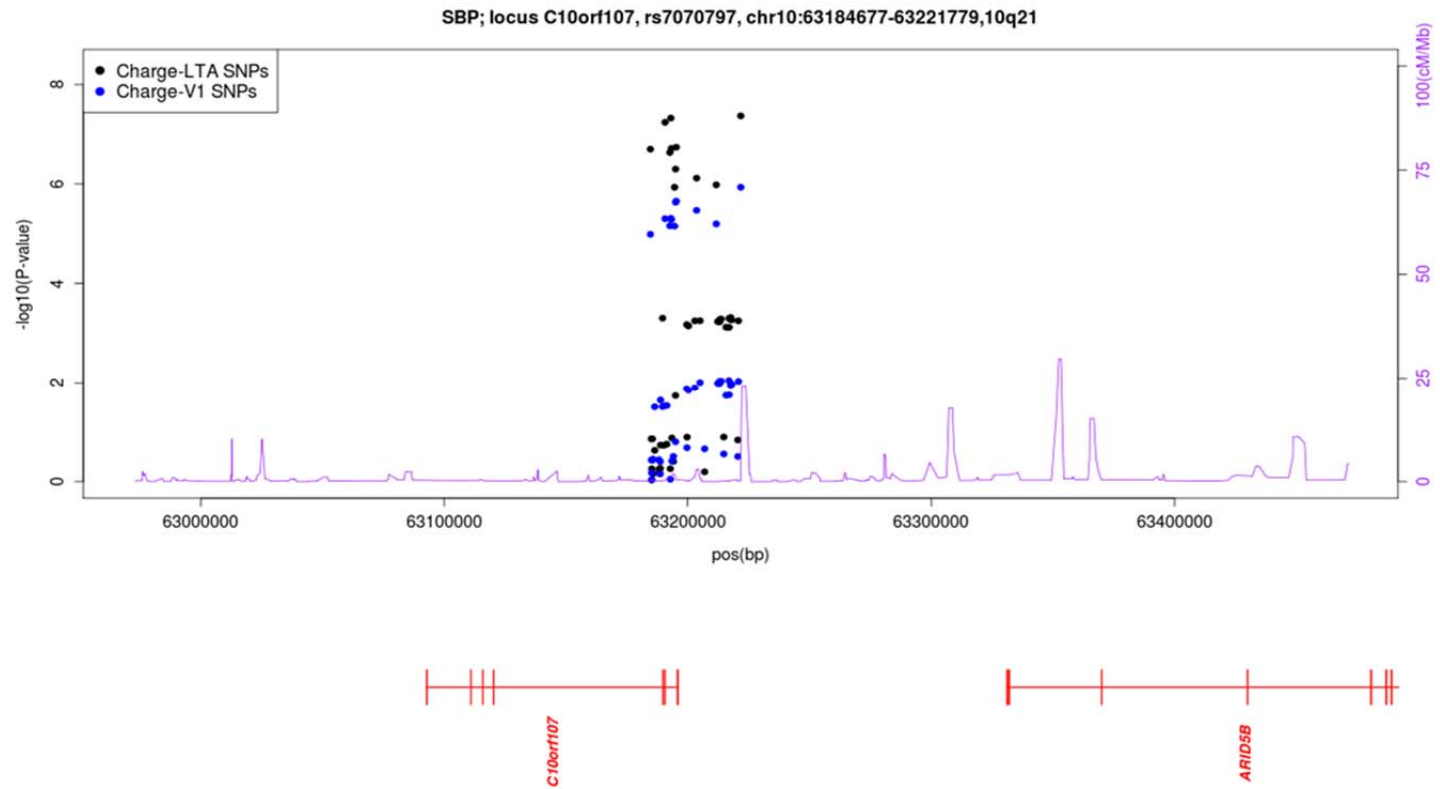

(a9)

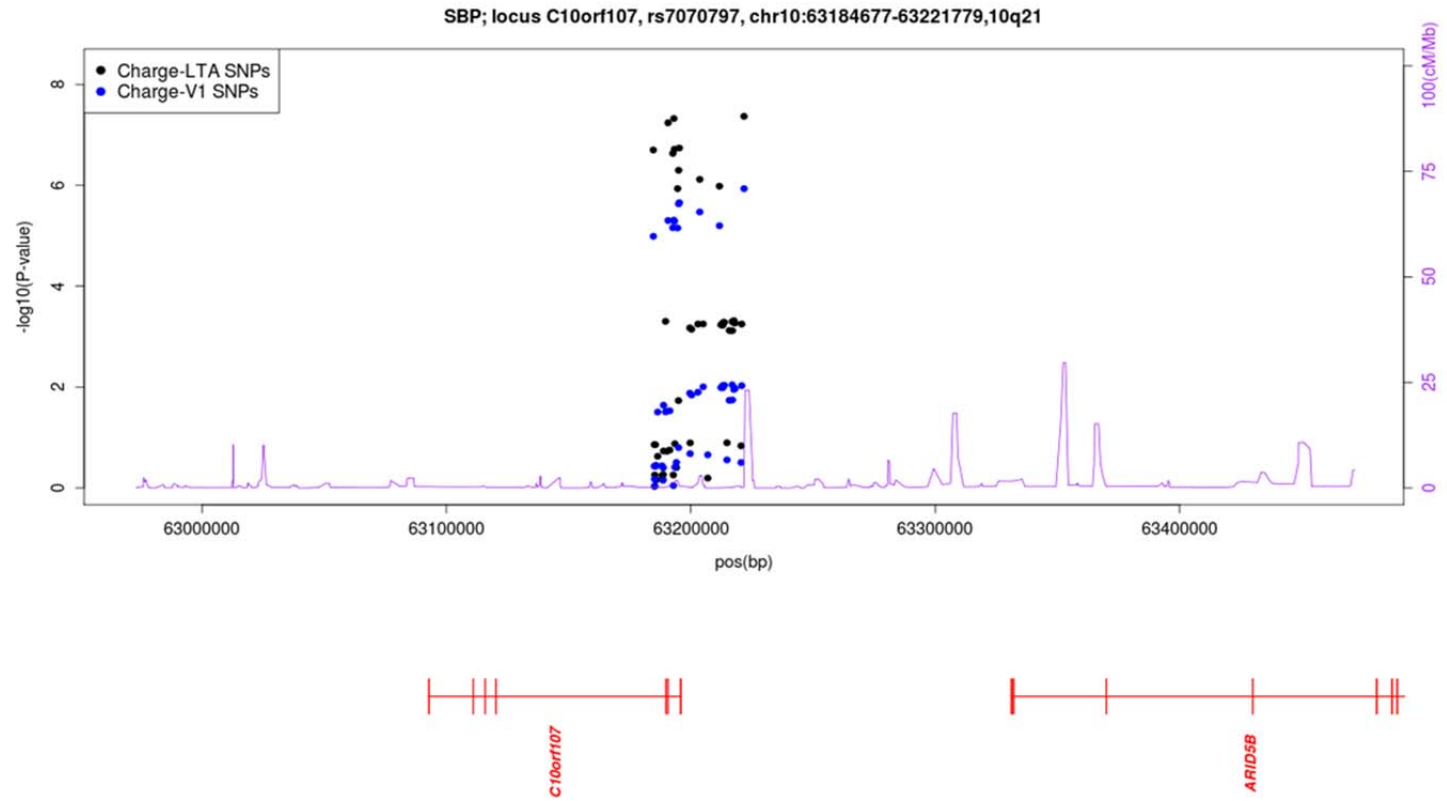



(a10)

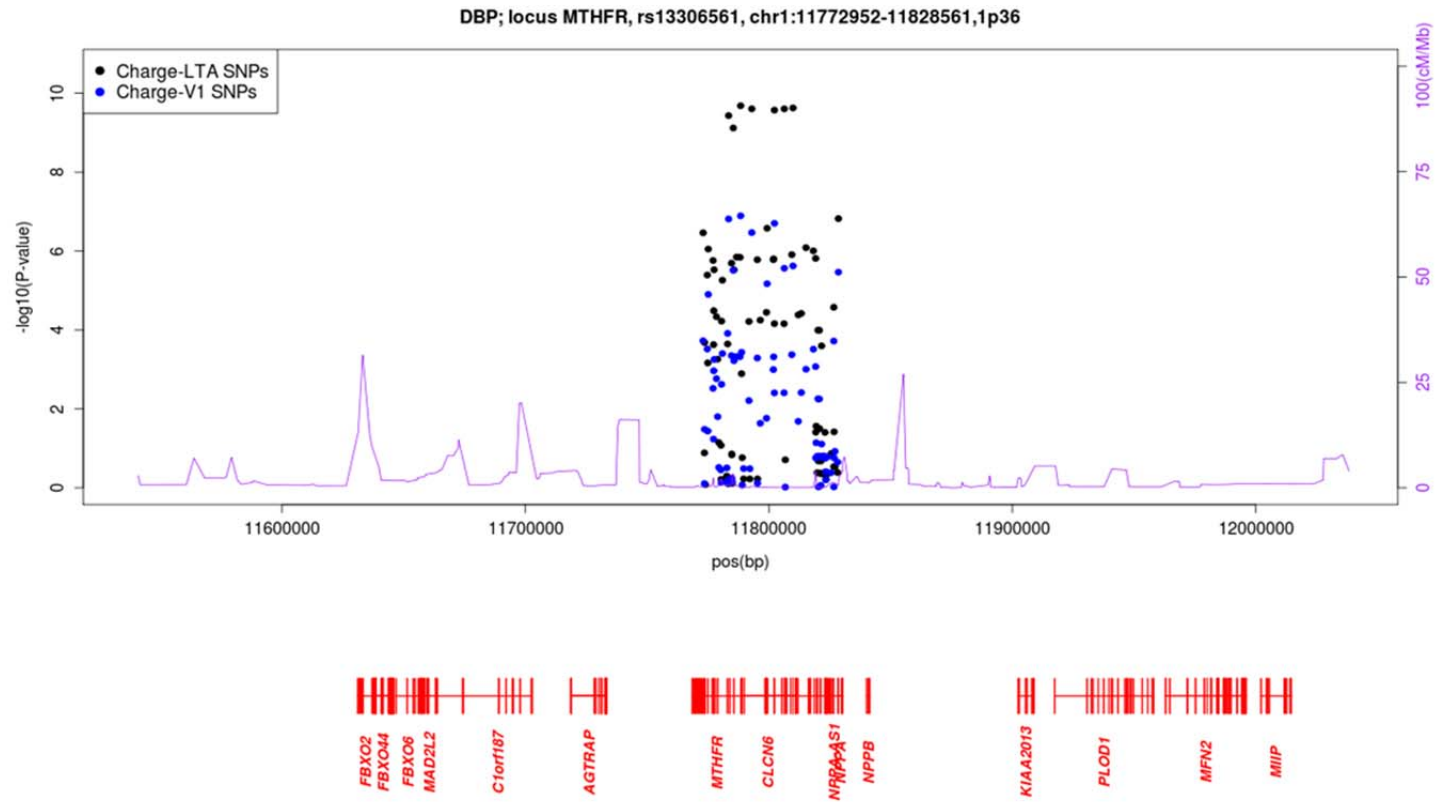

(a11)

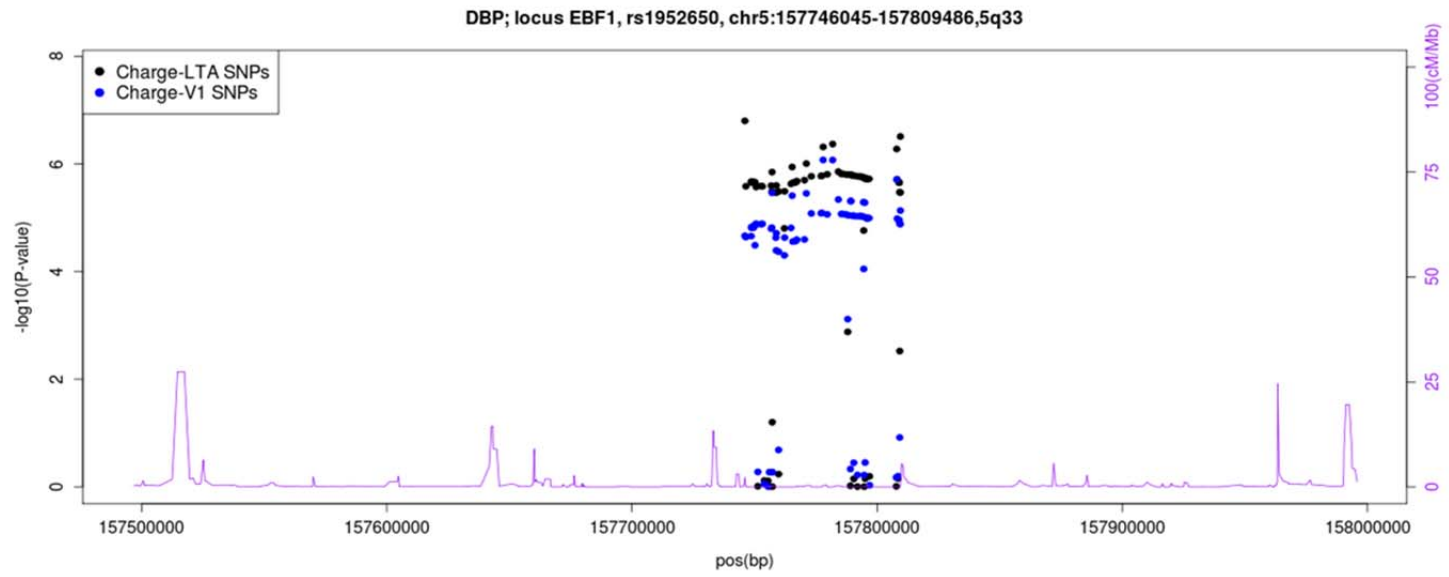



(a13)

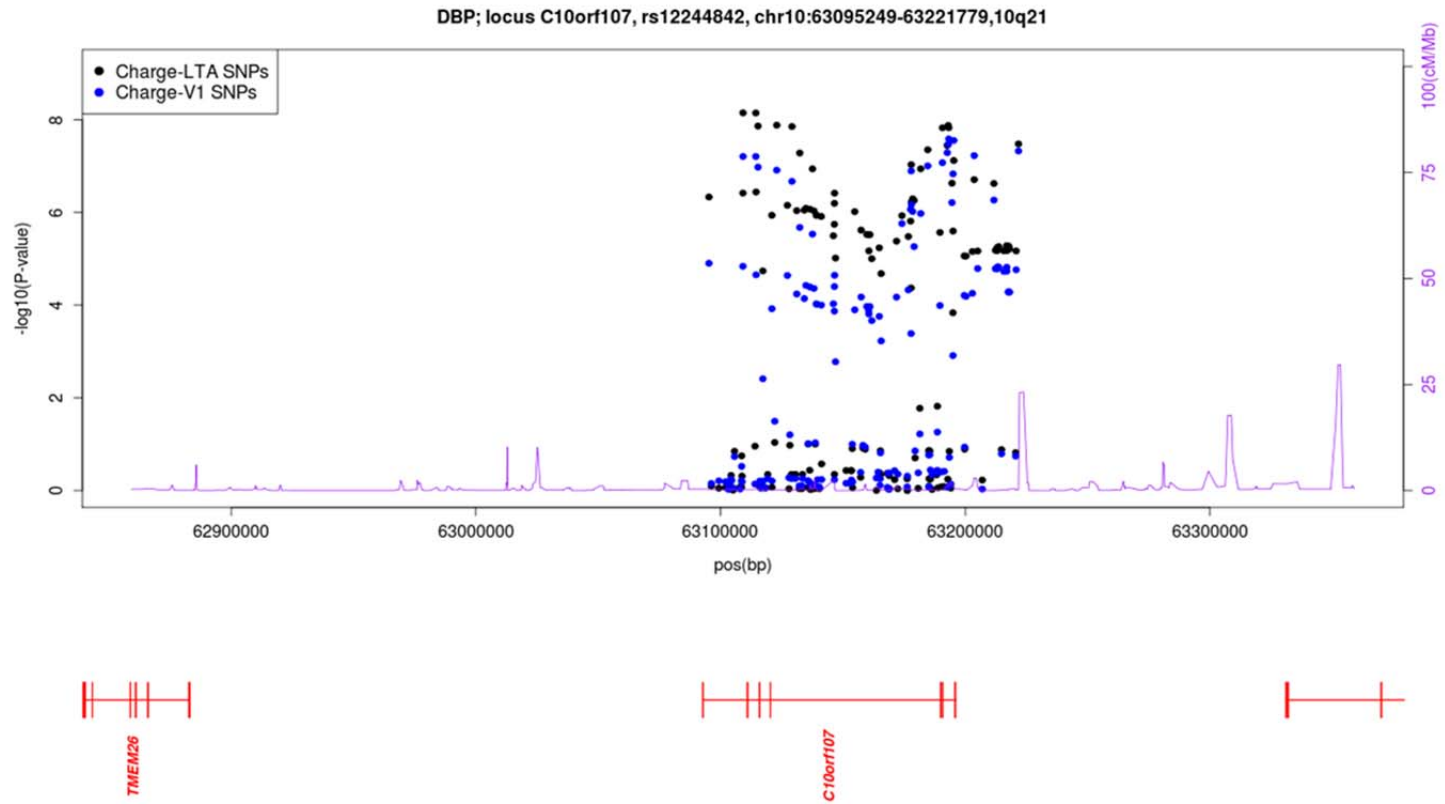

(a14)

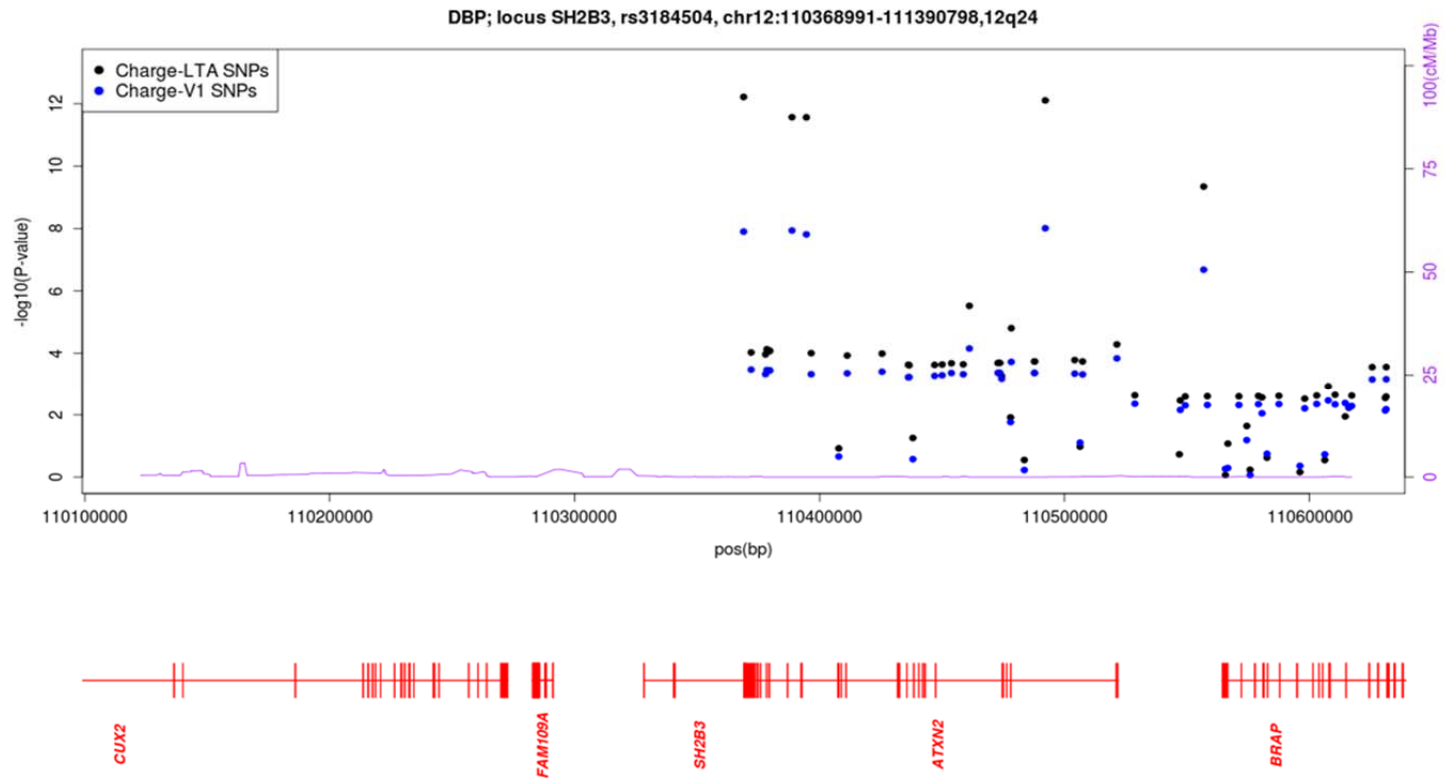

(a15)

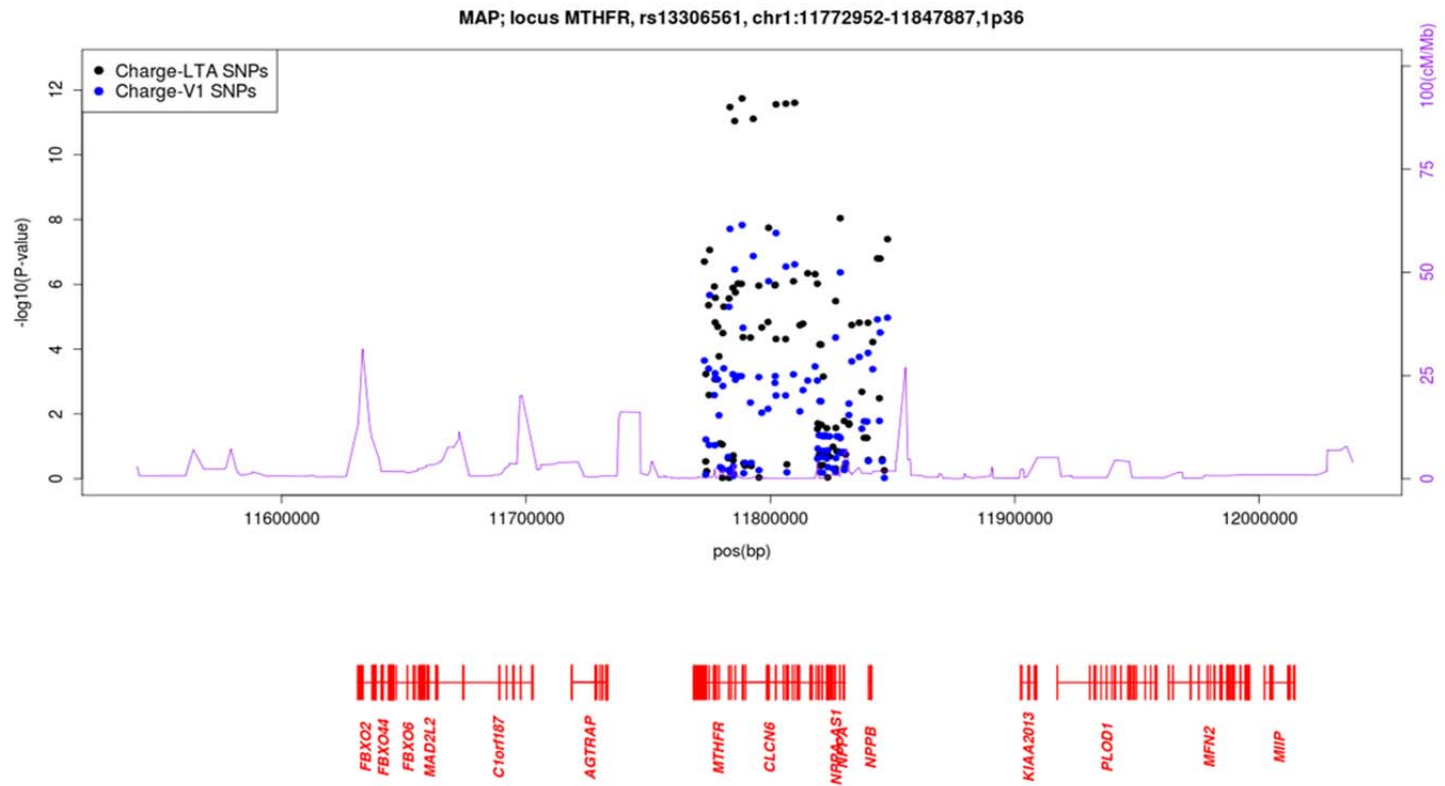

(a16)

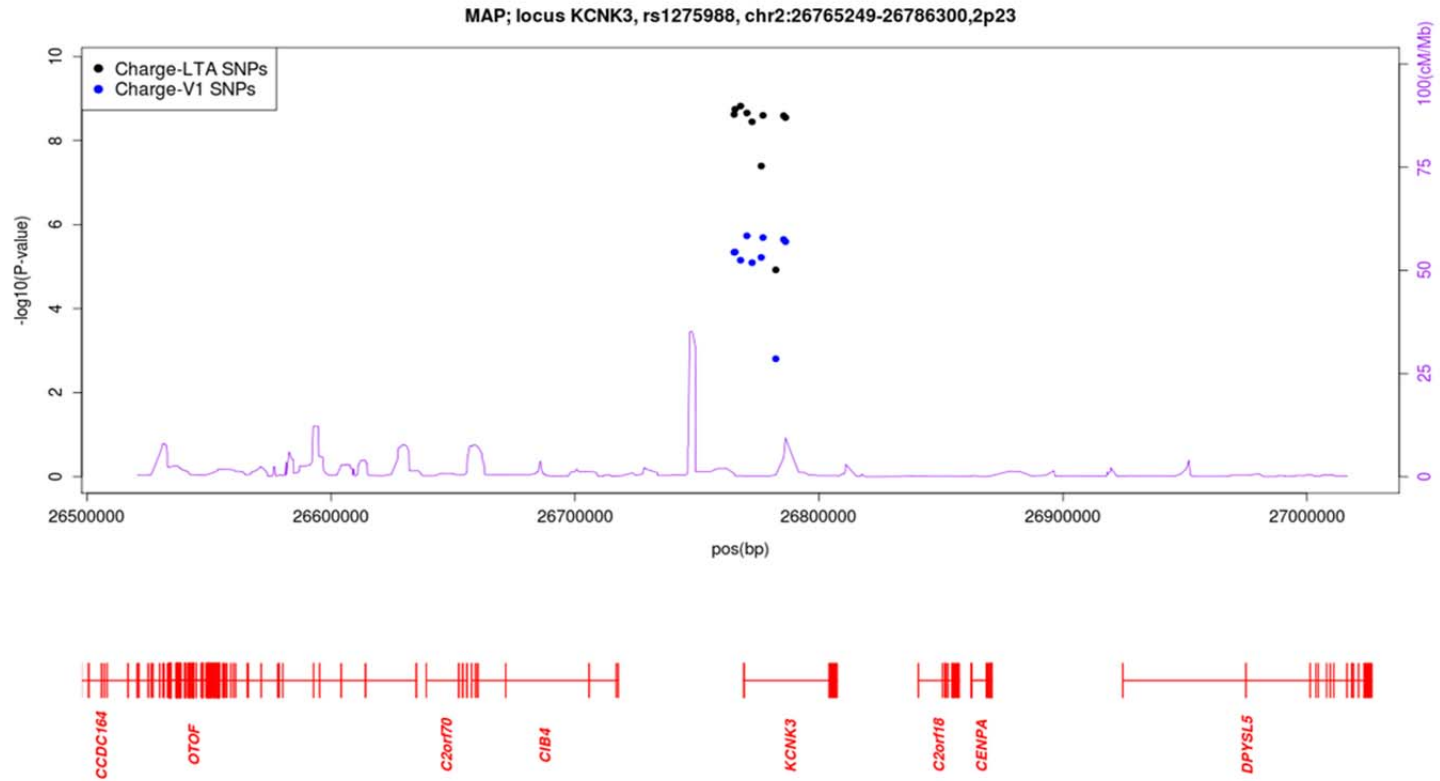

(a17)

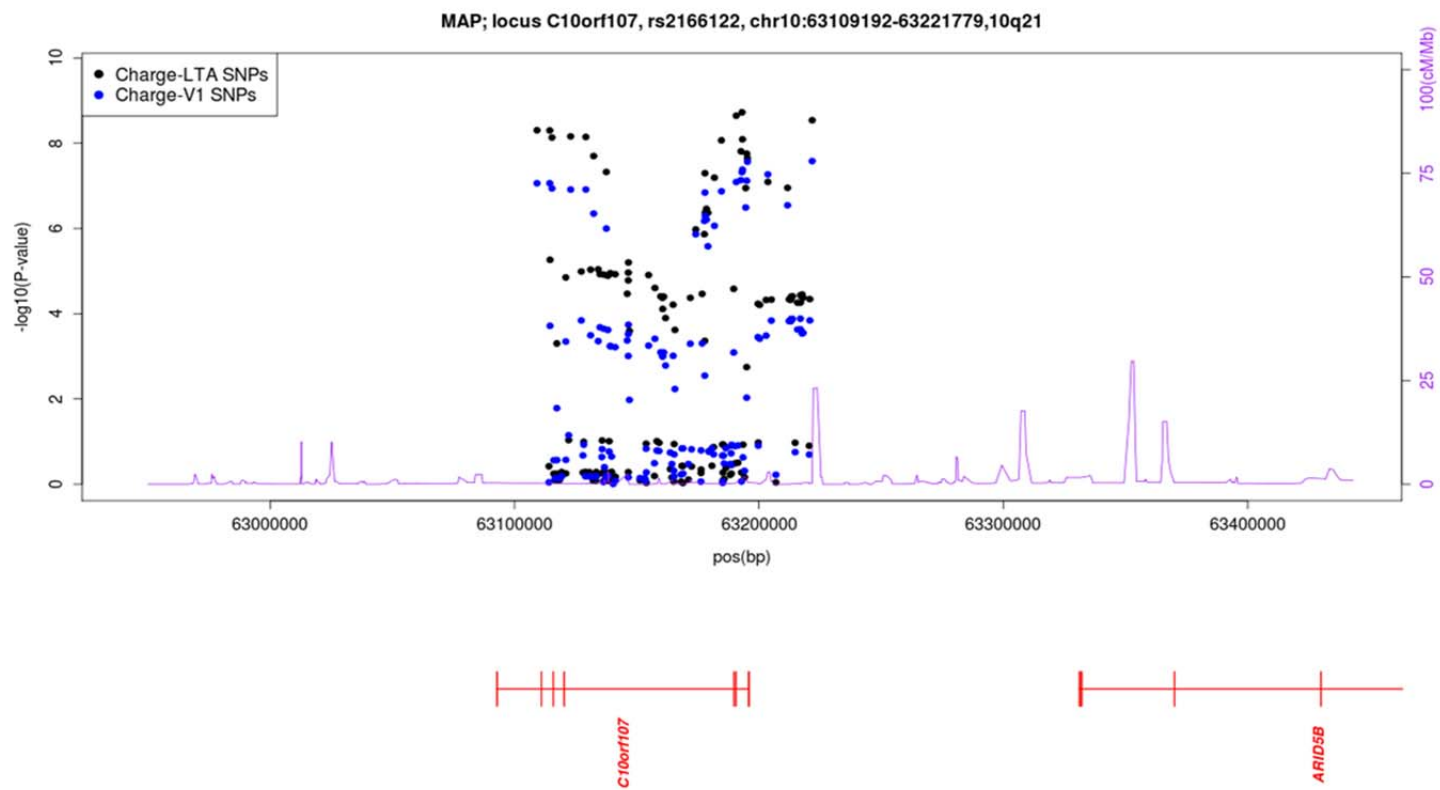



(a18)

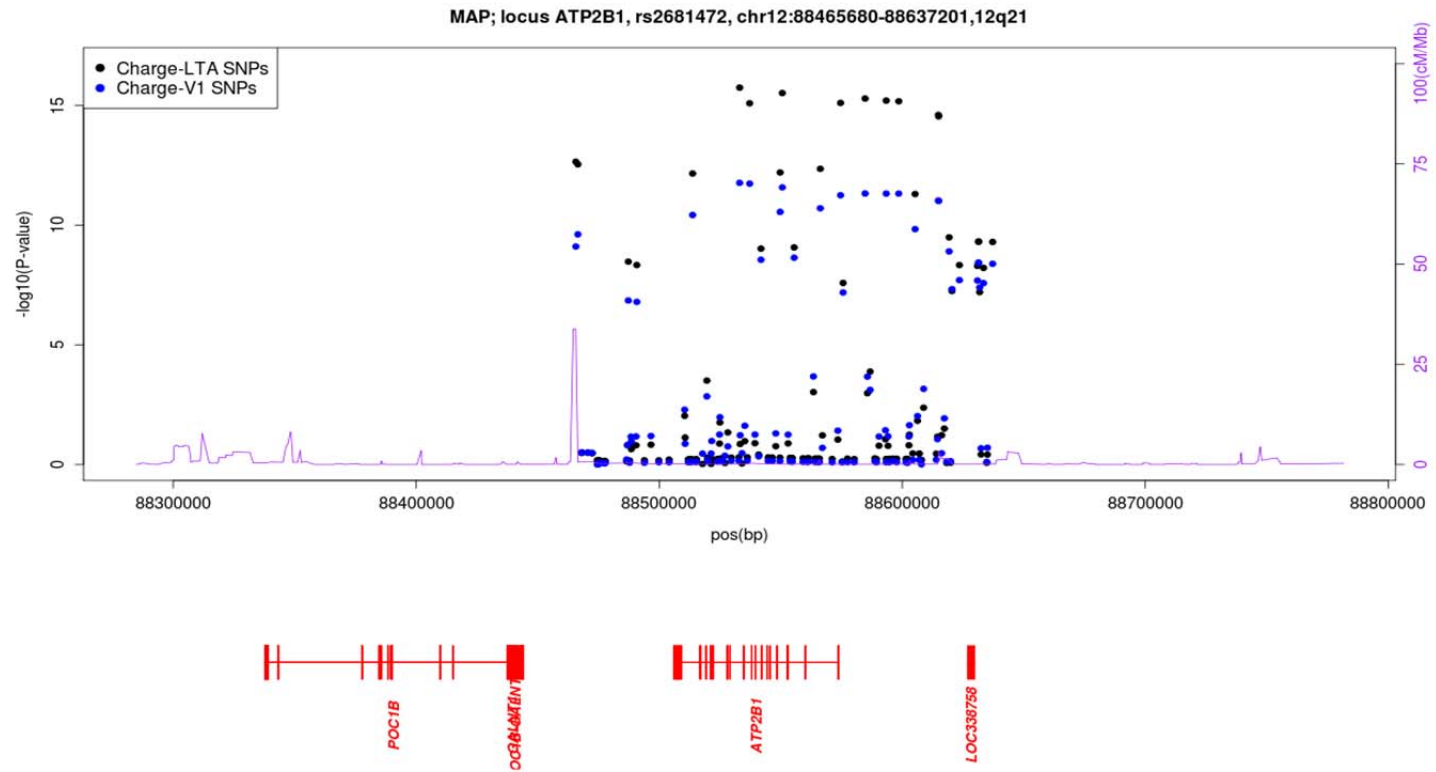

(a19)

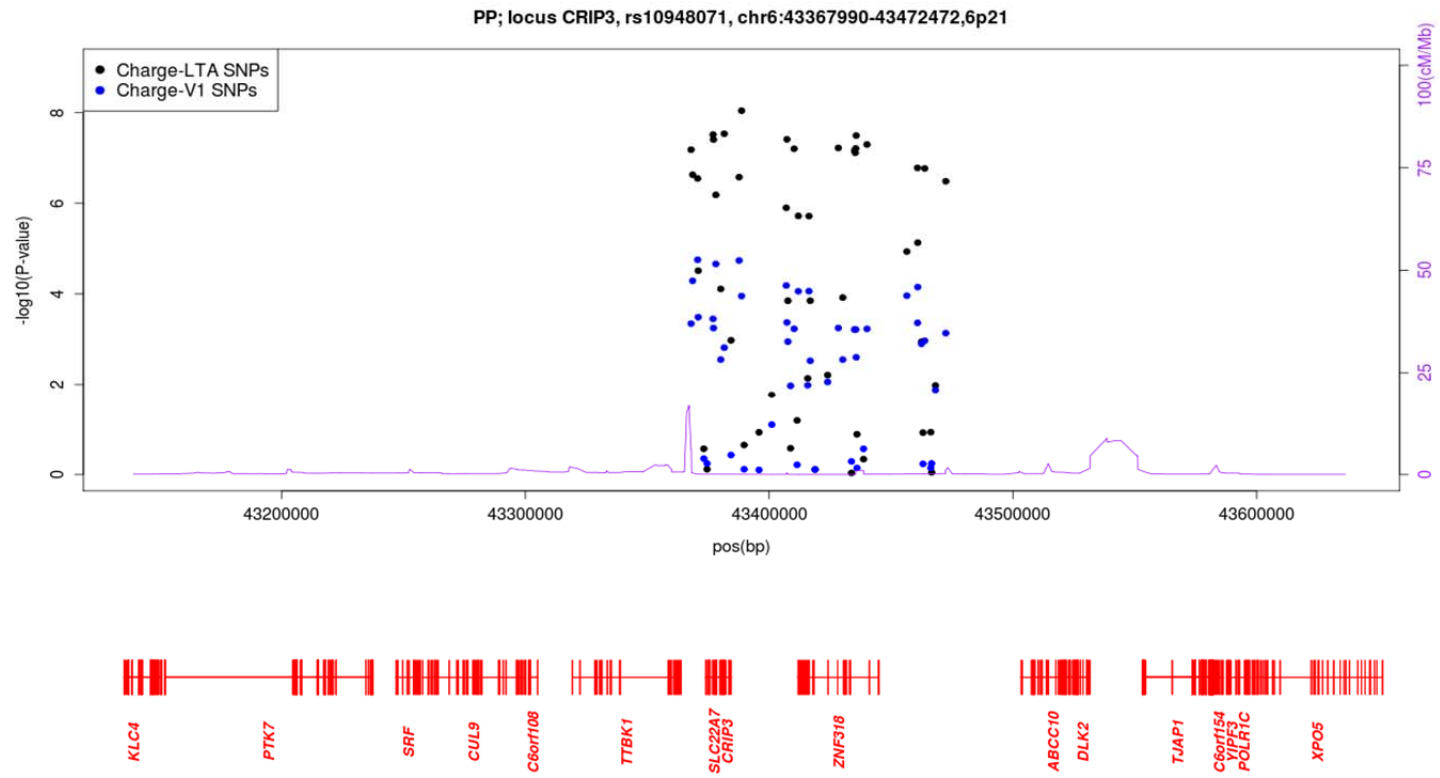

(a20)

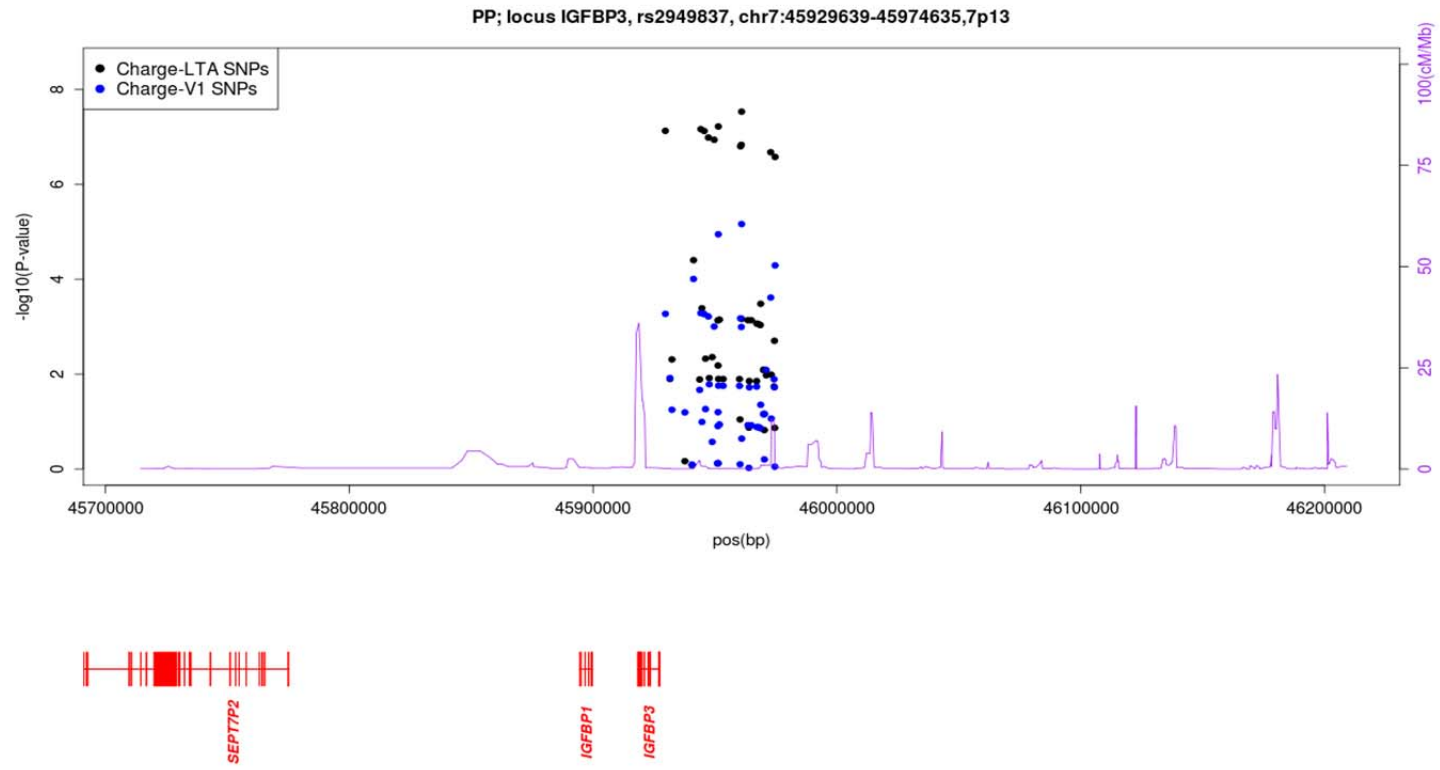

(a21)

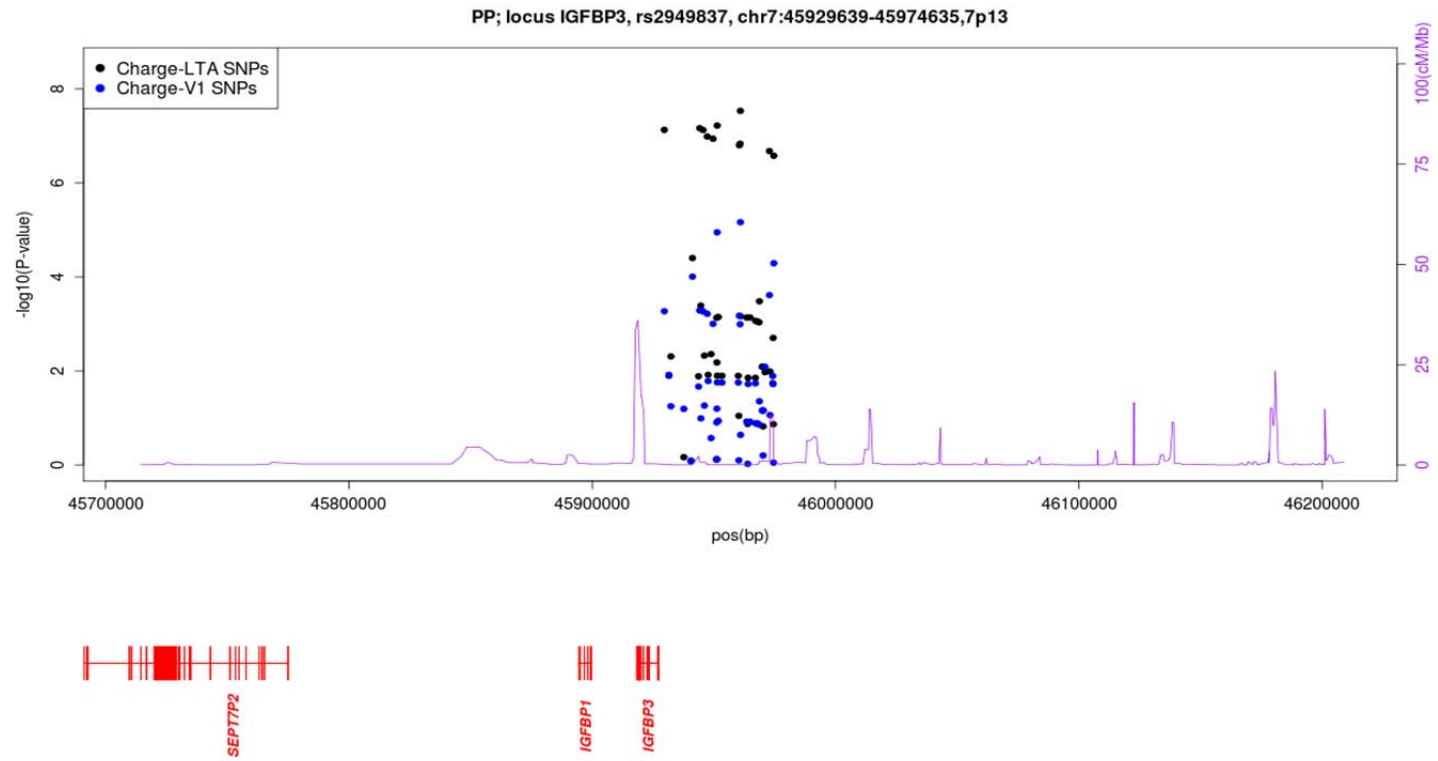

(b1)

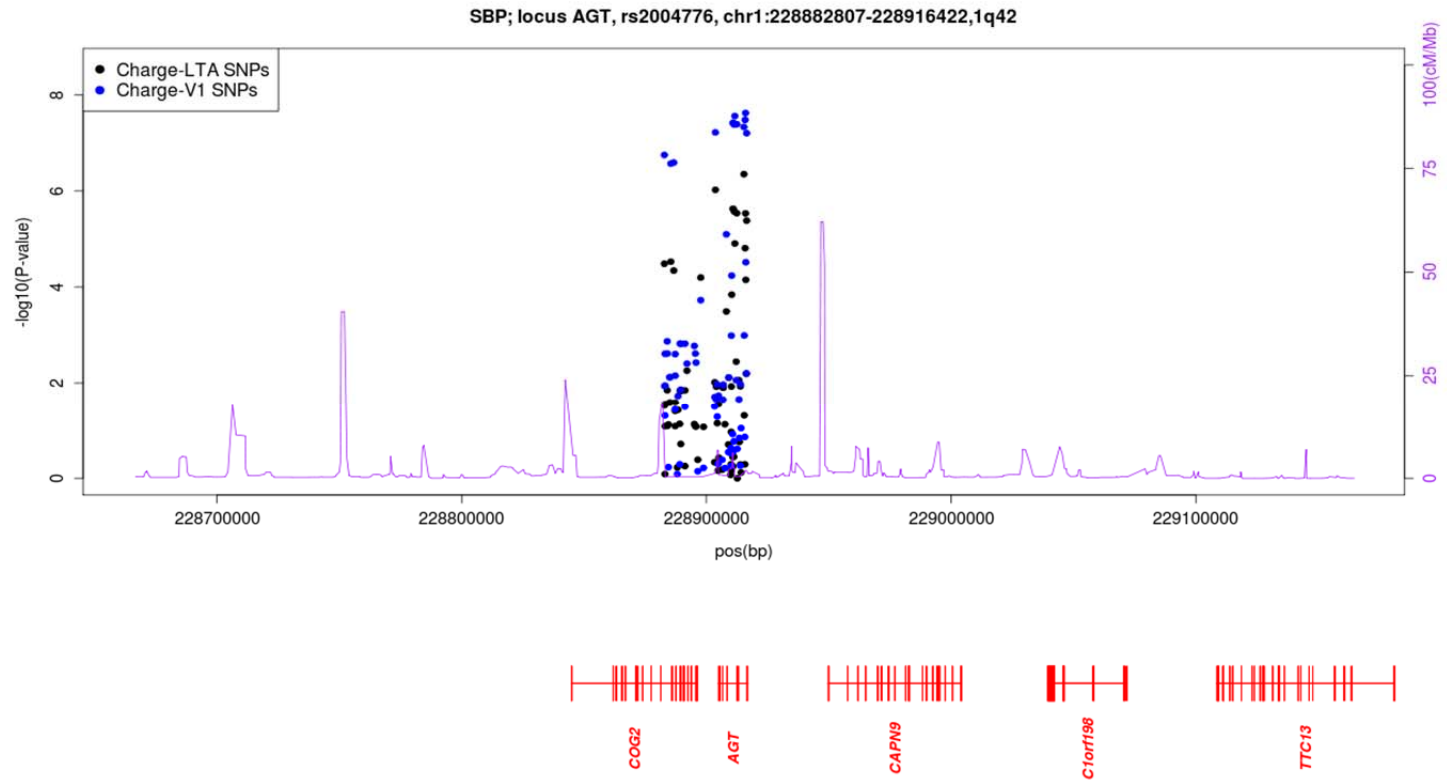

(b2)

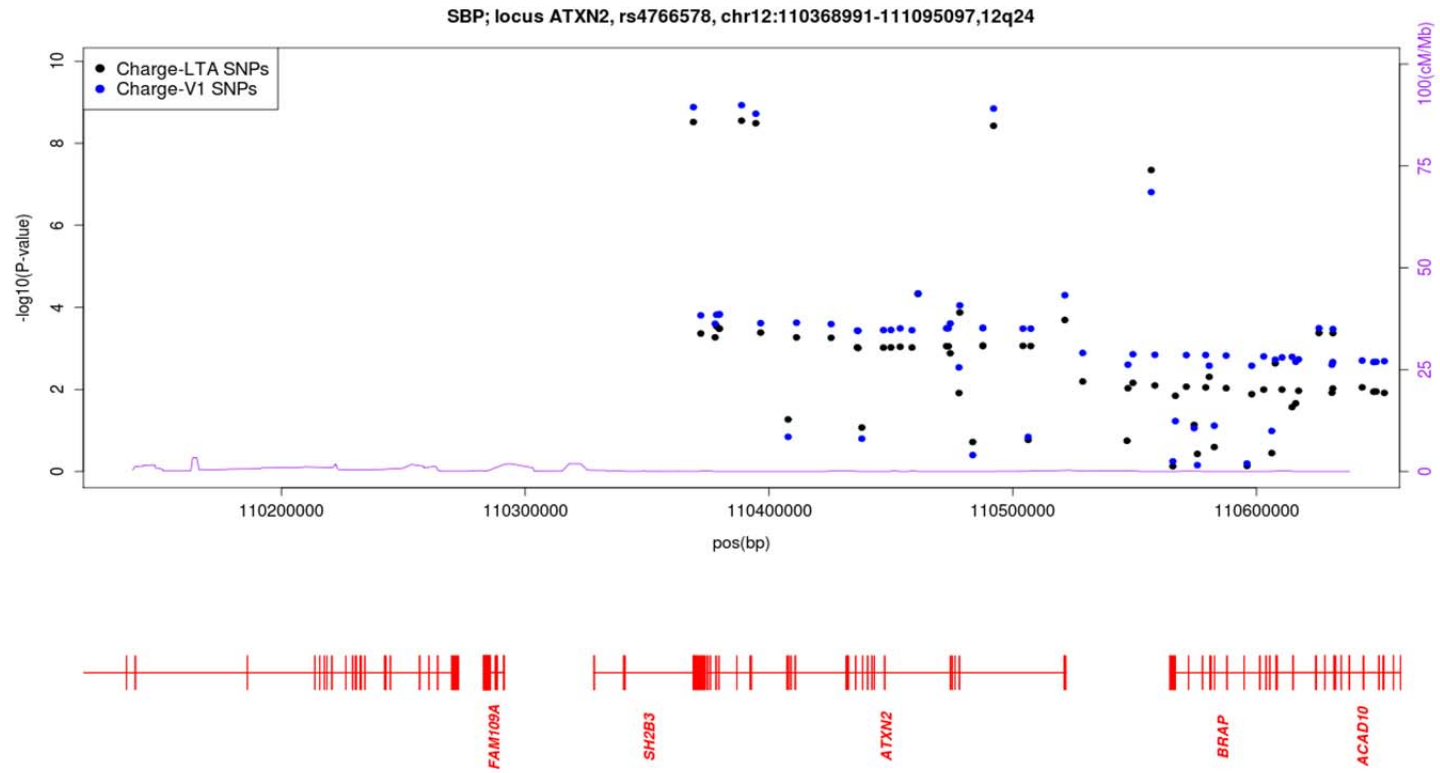

(b3)

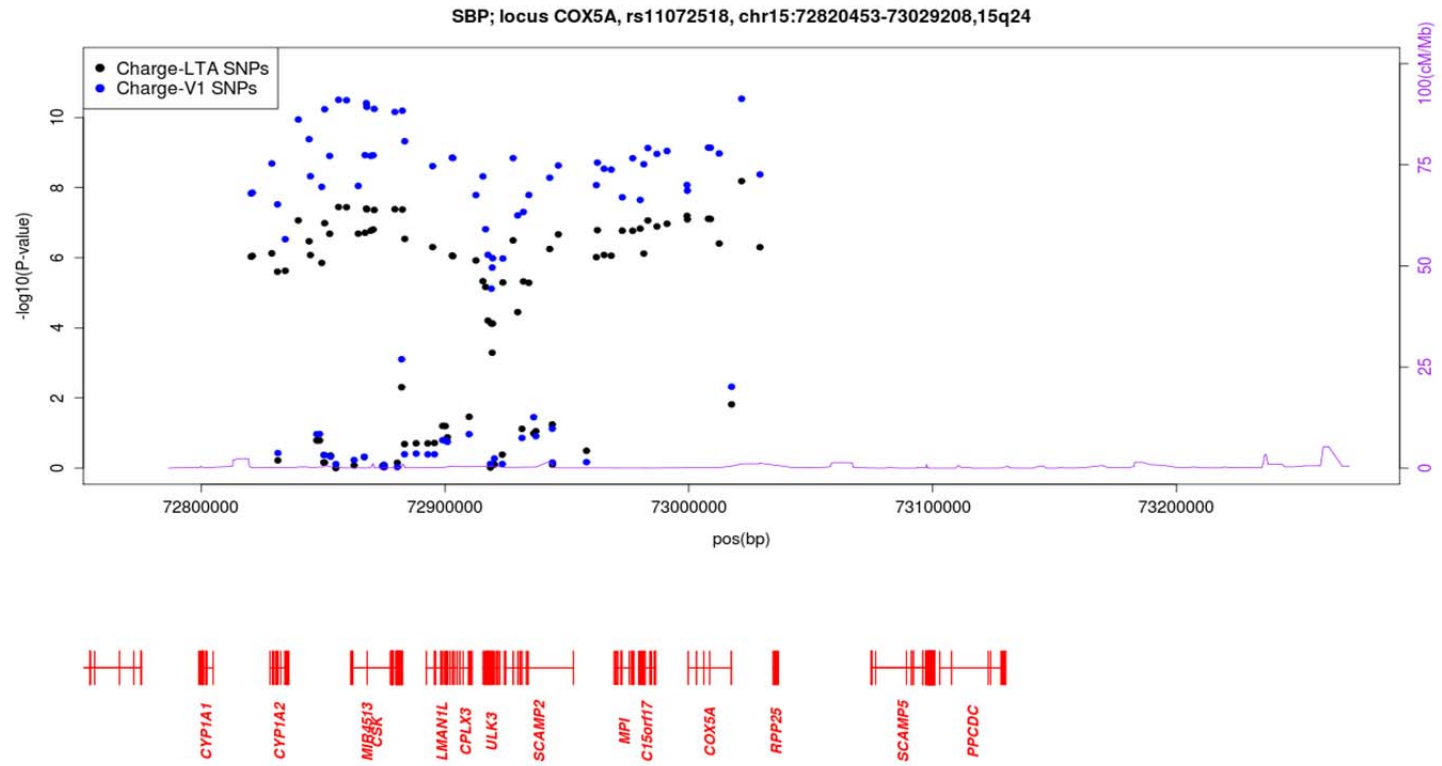

(b4)

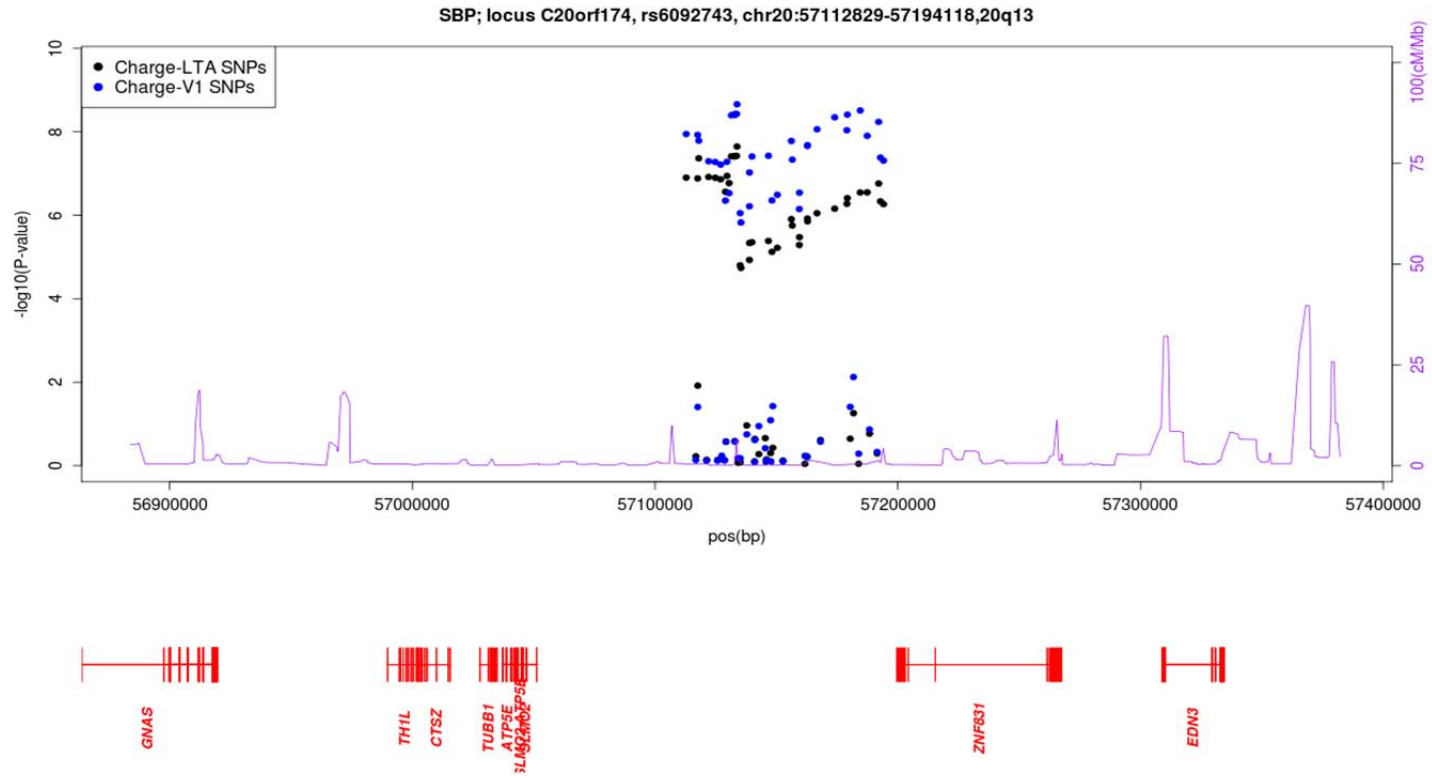



(b5)

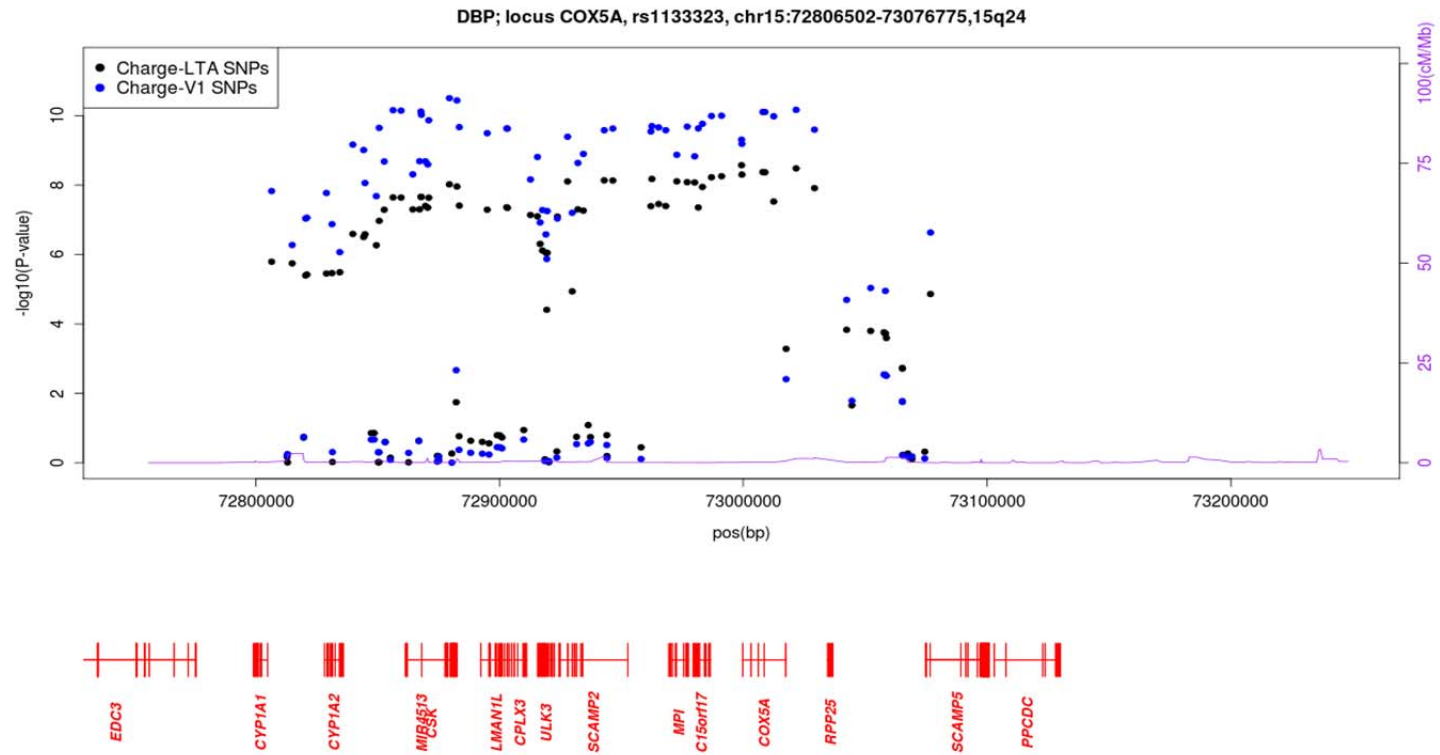

(b6)

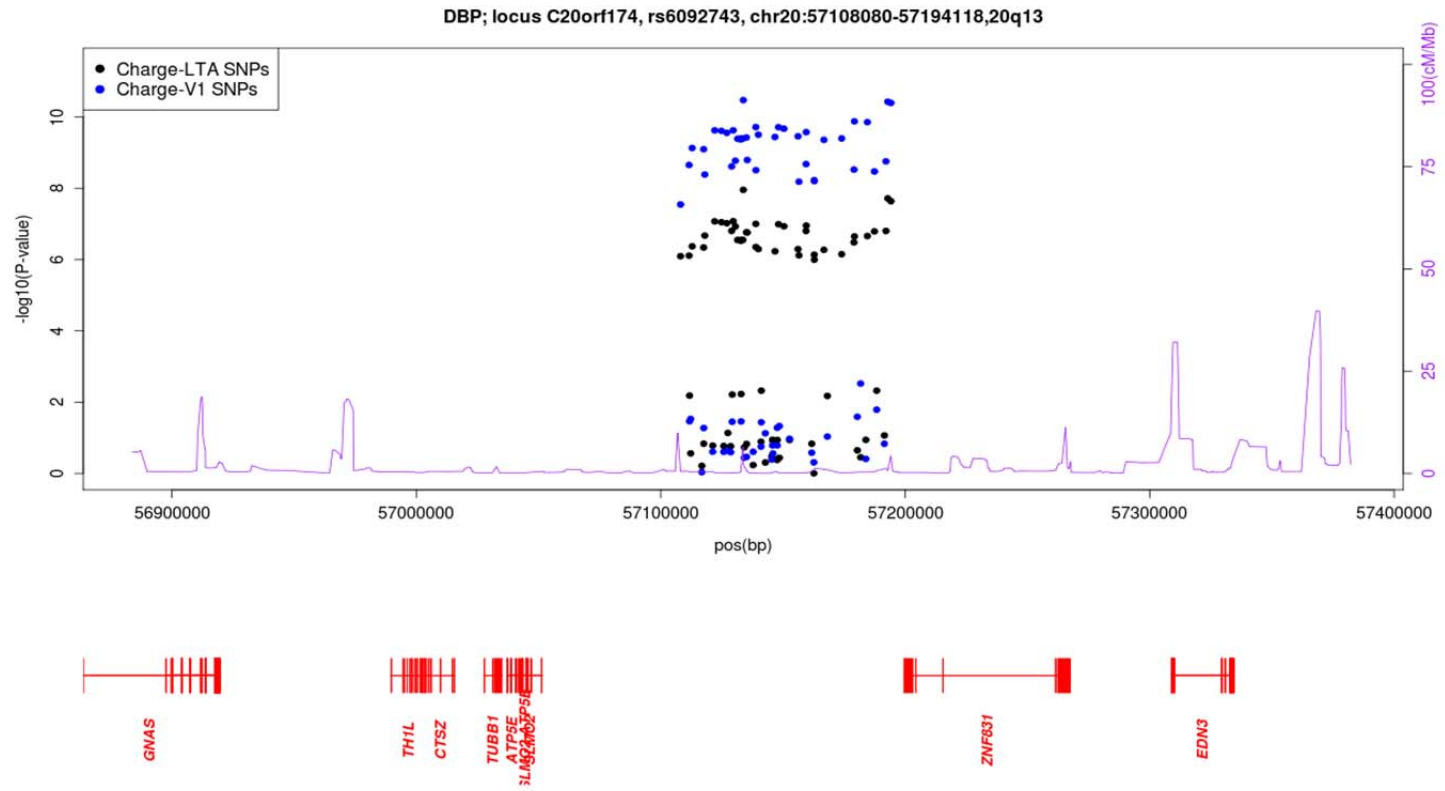

(b7)

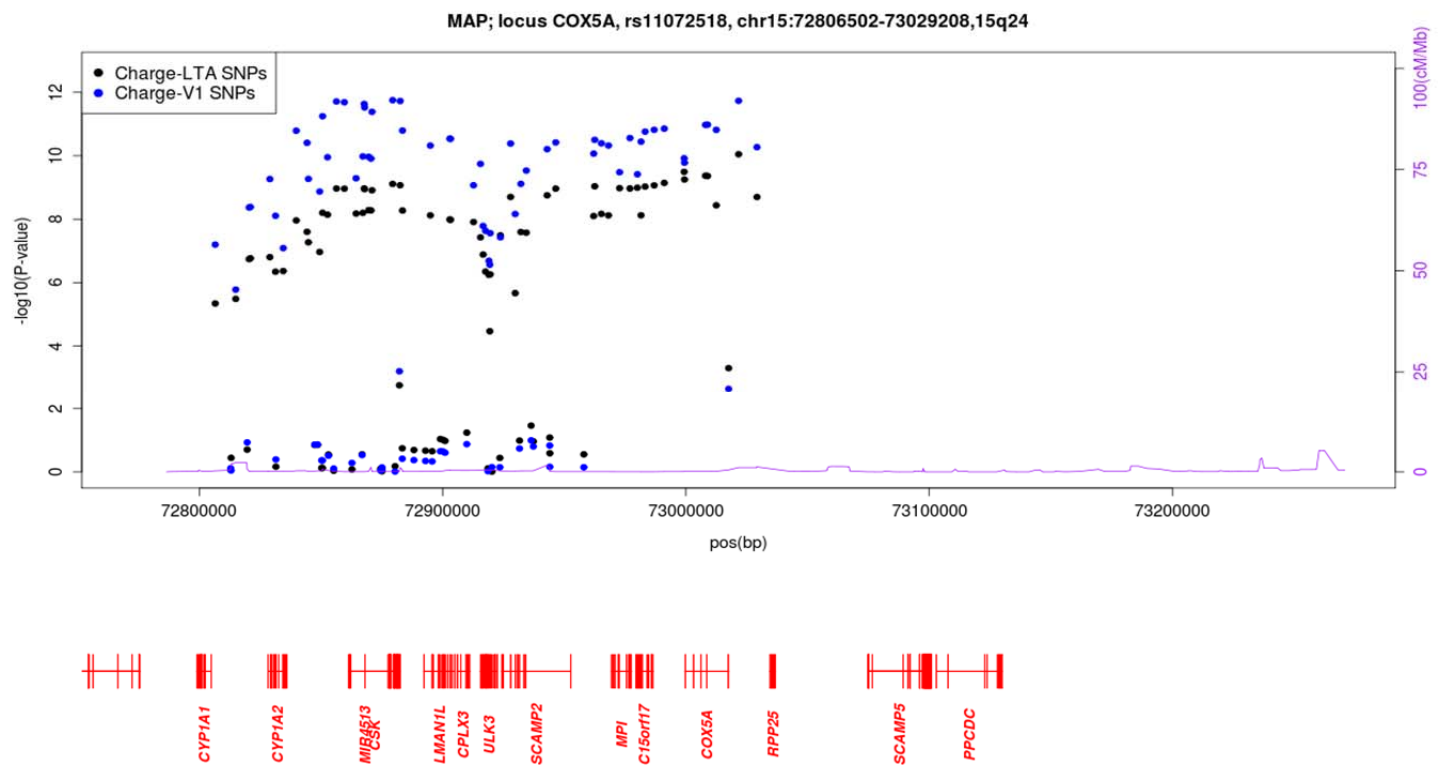

(b8)

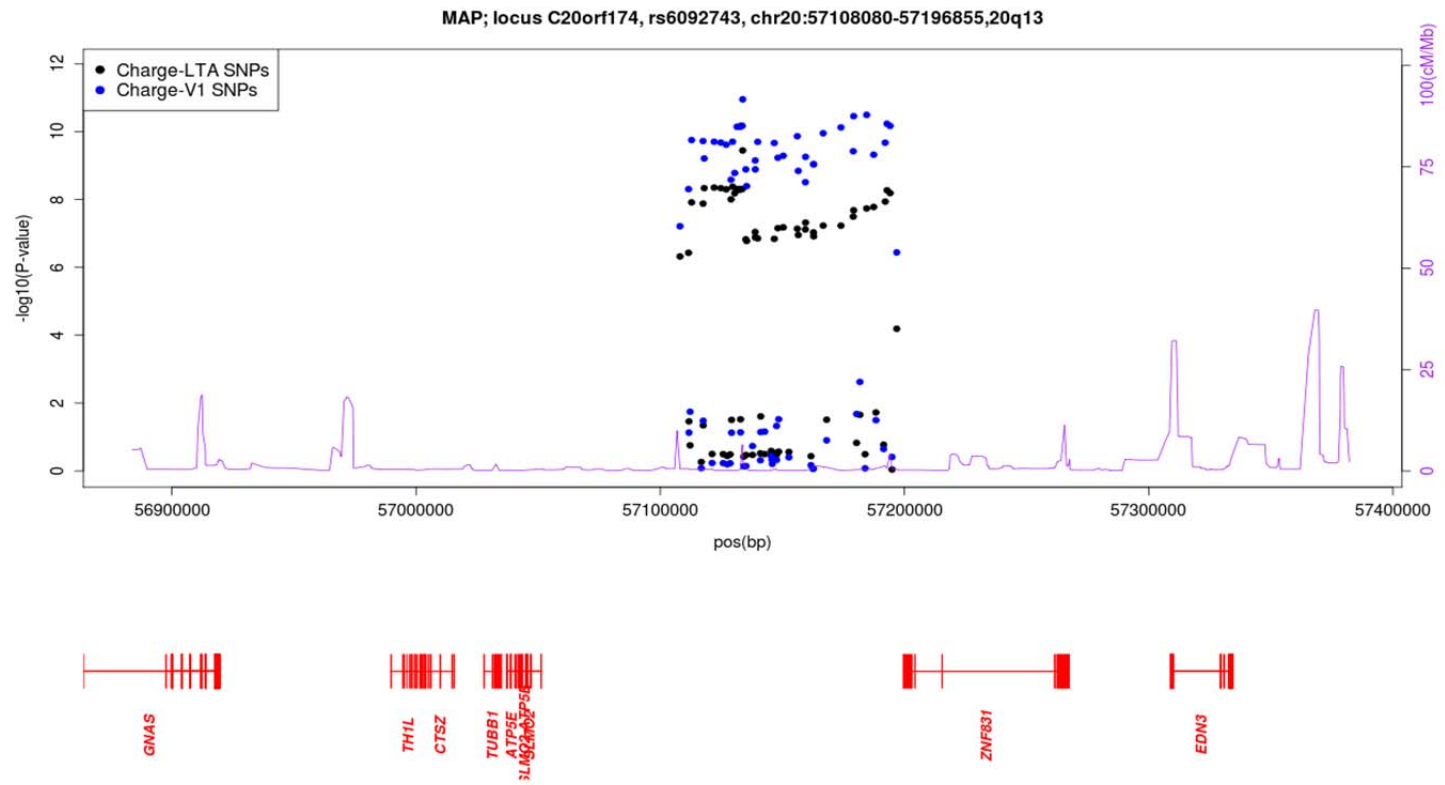

(c1)

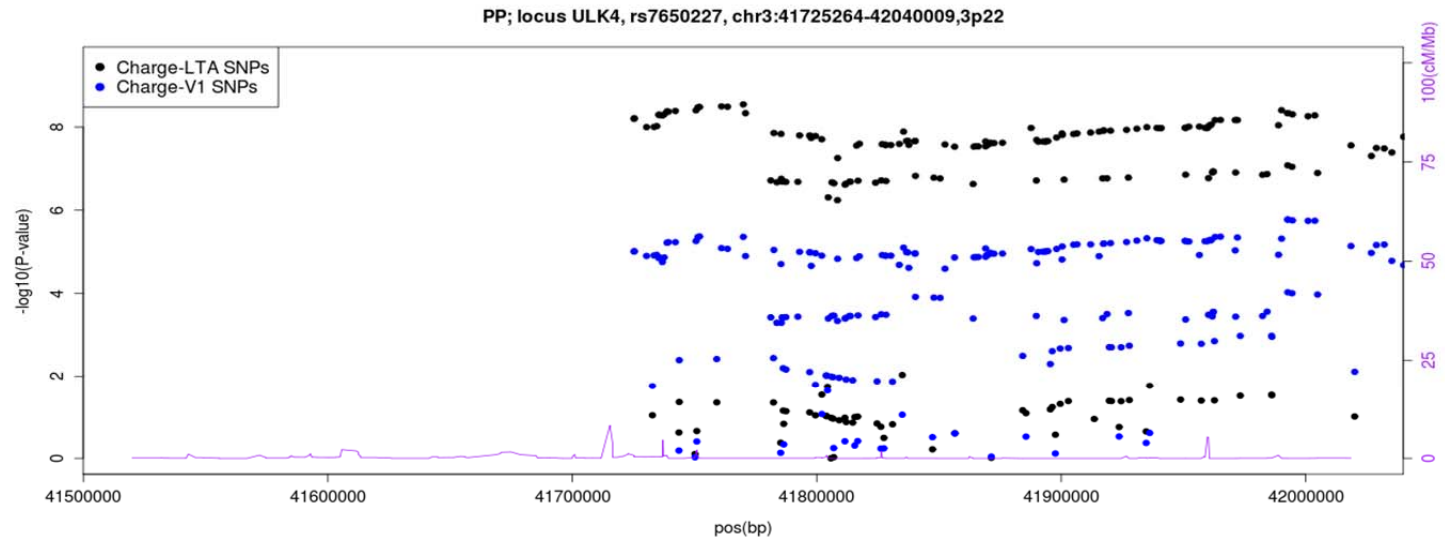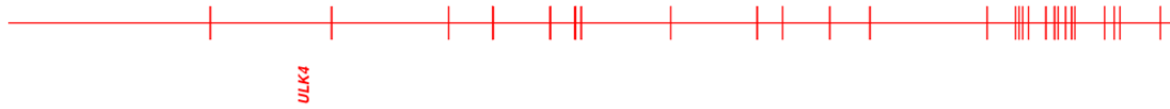

(d1)

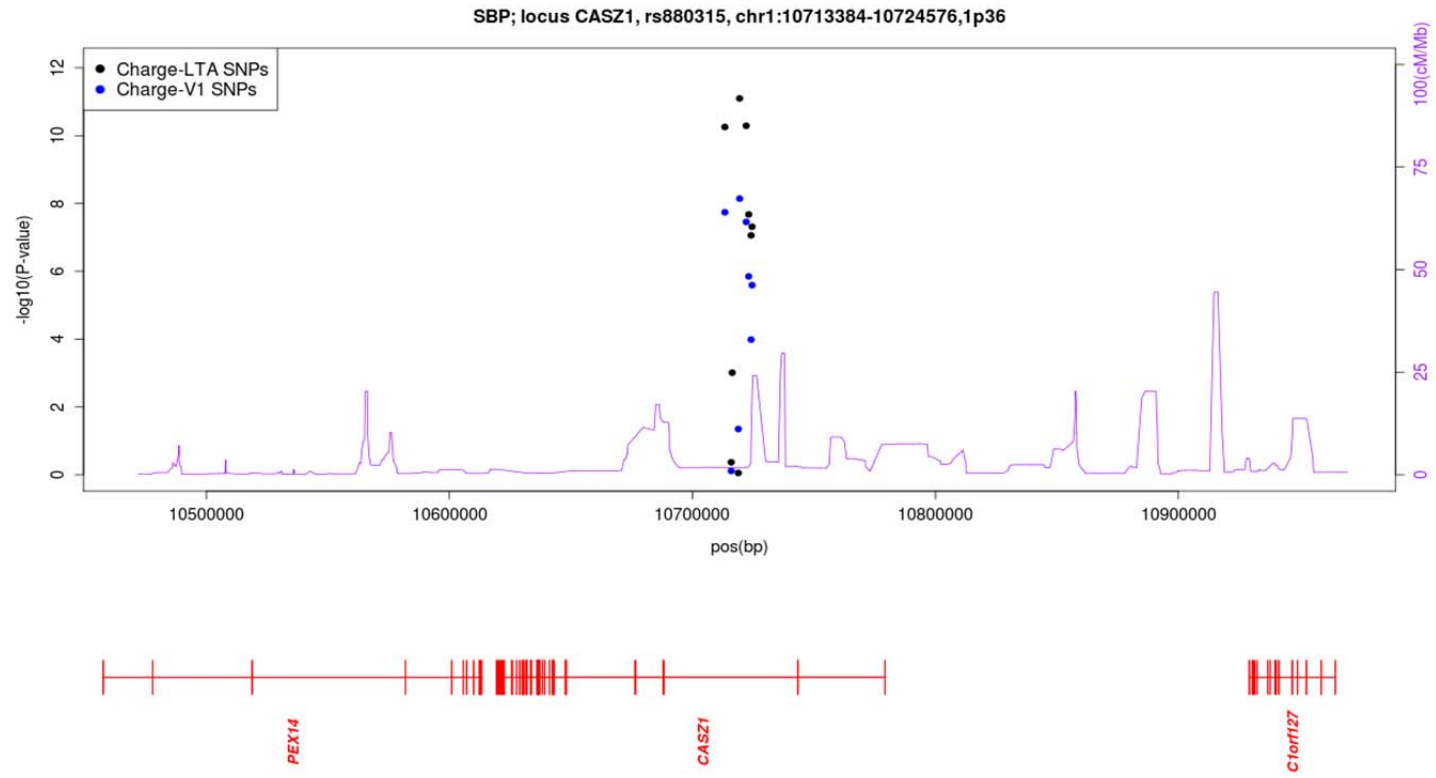

(d2)

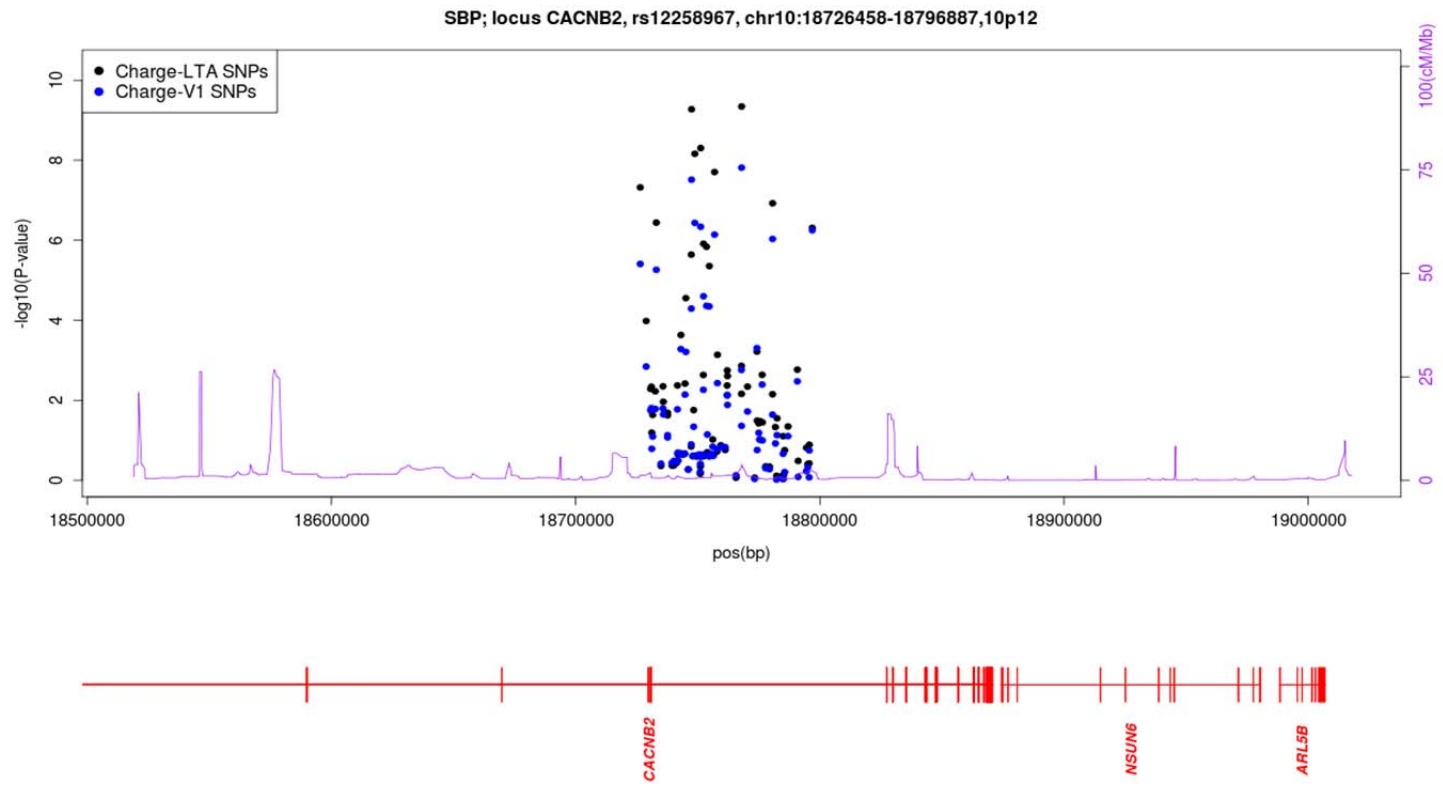

(d3)

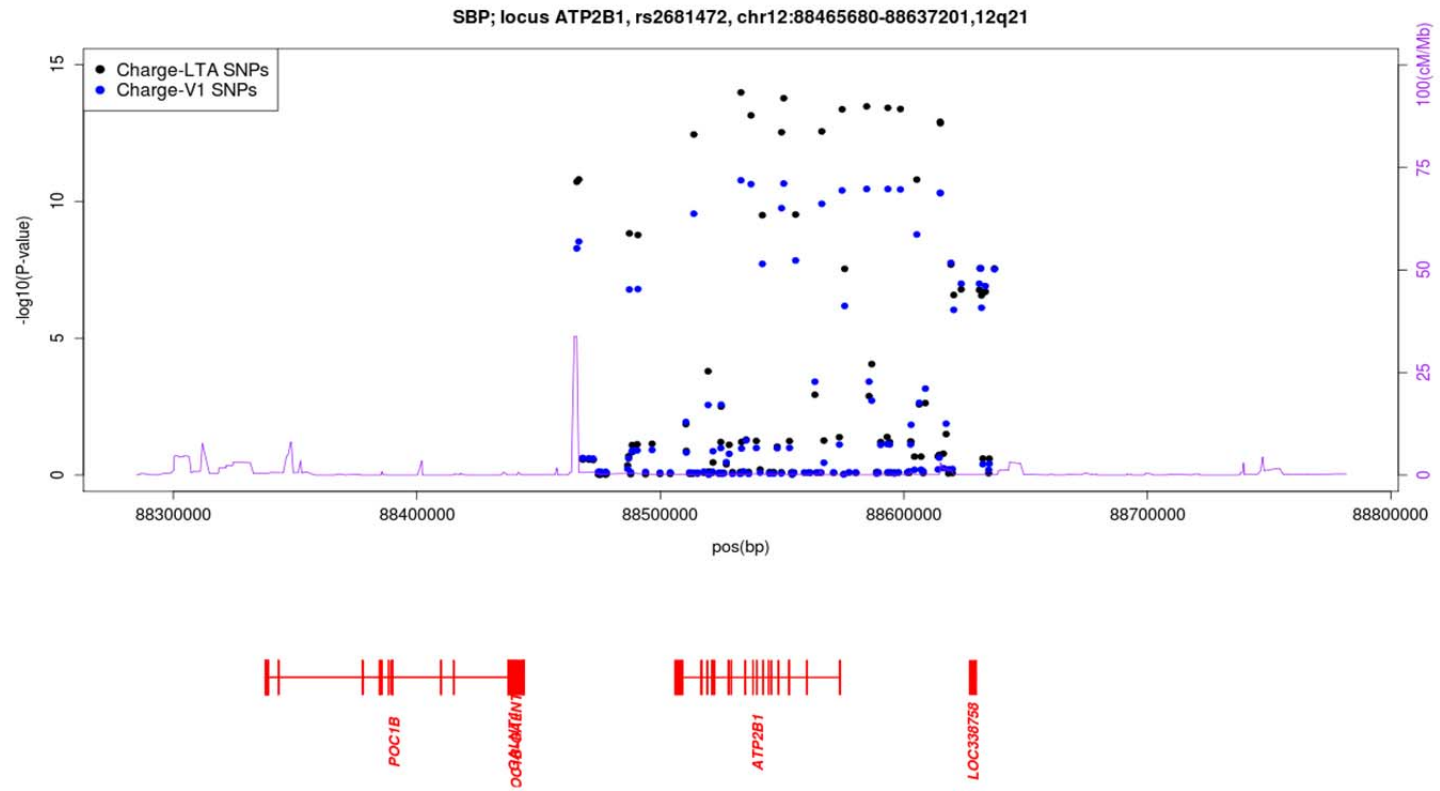



(d4)

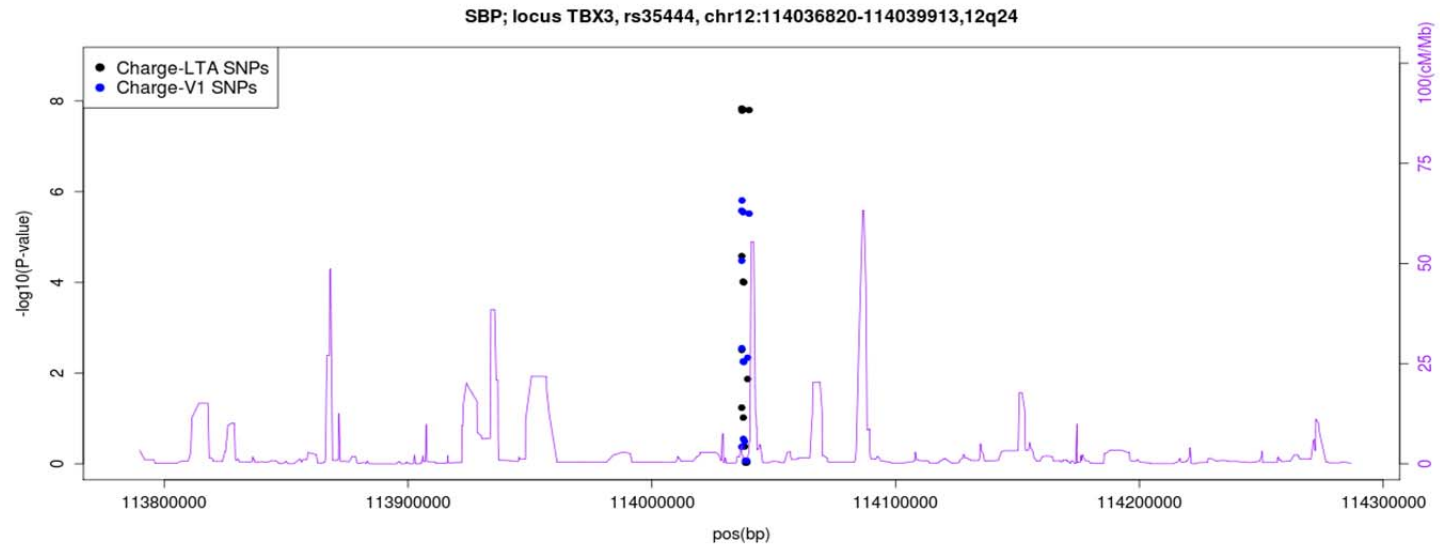

(d5)

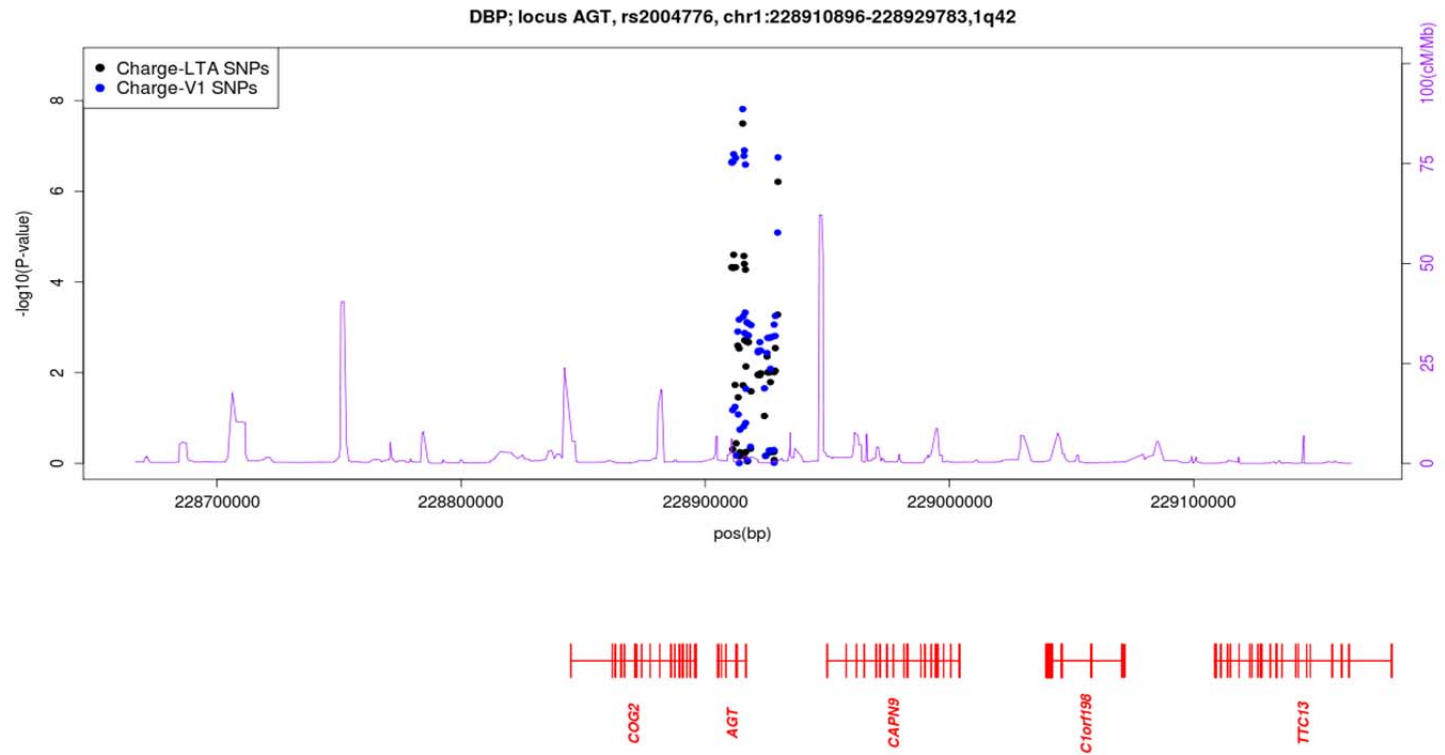

(d6)

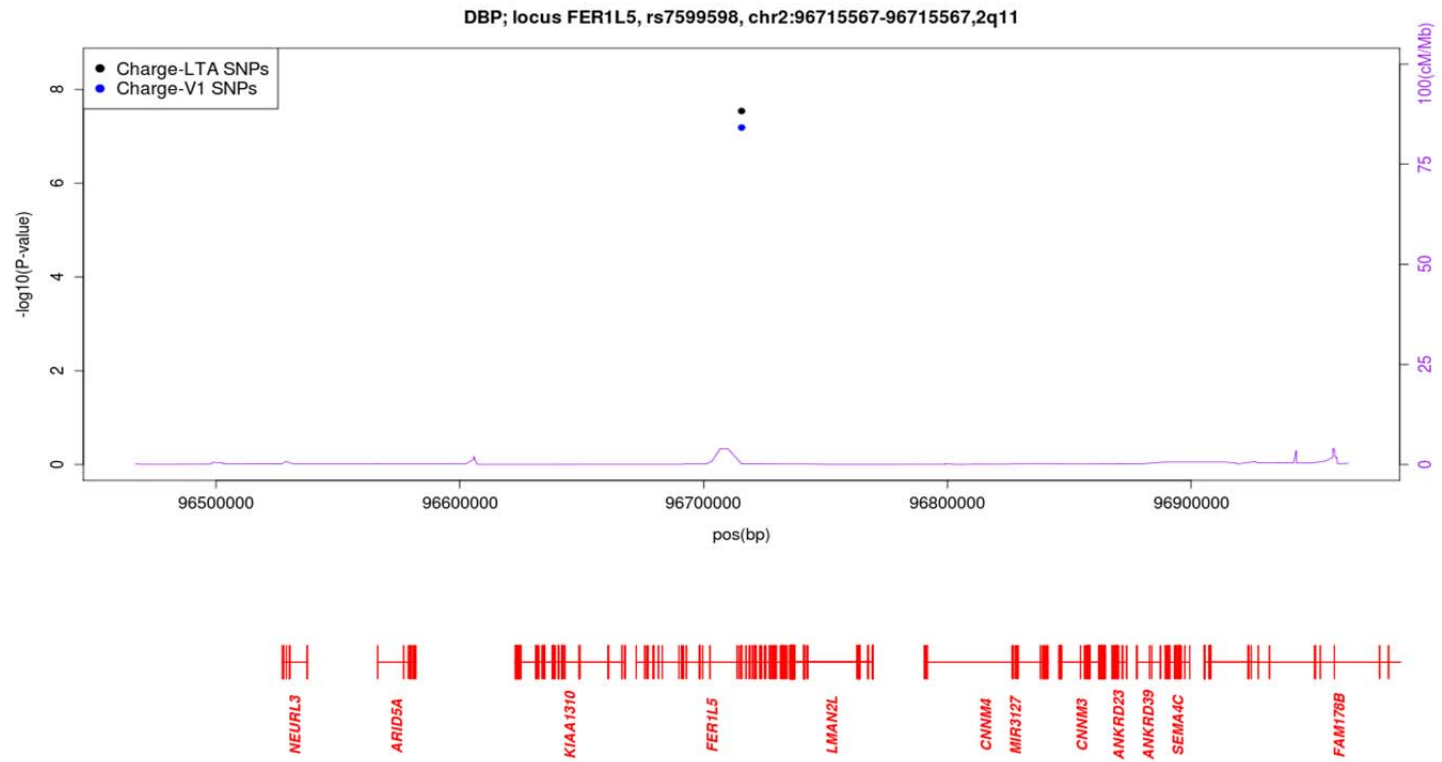

(d7)

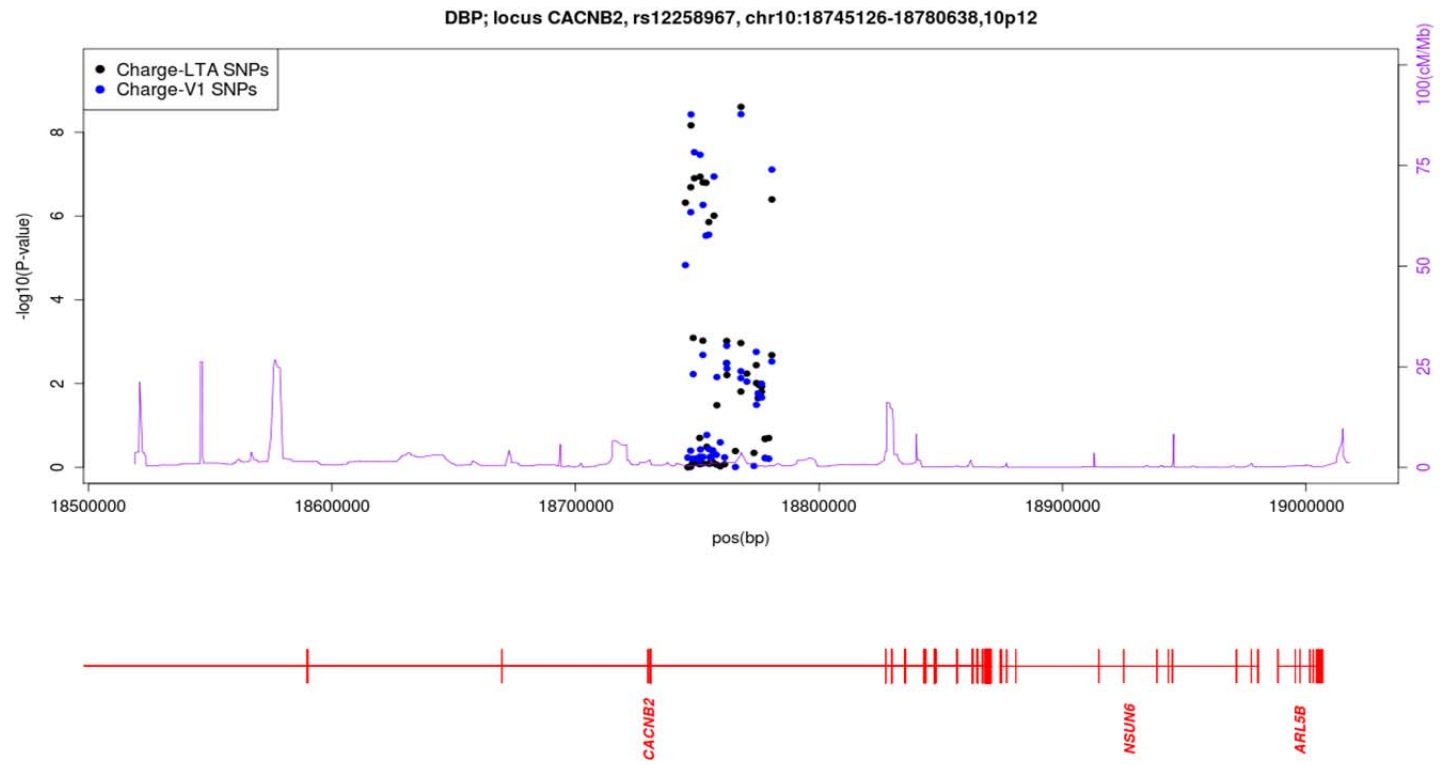

(d8)

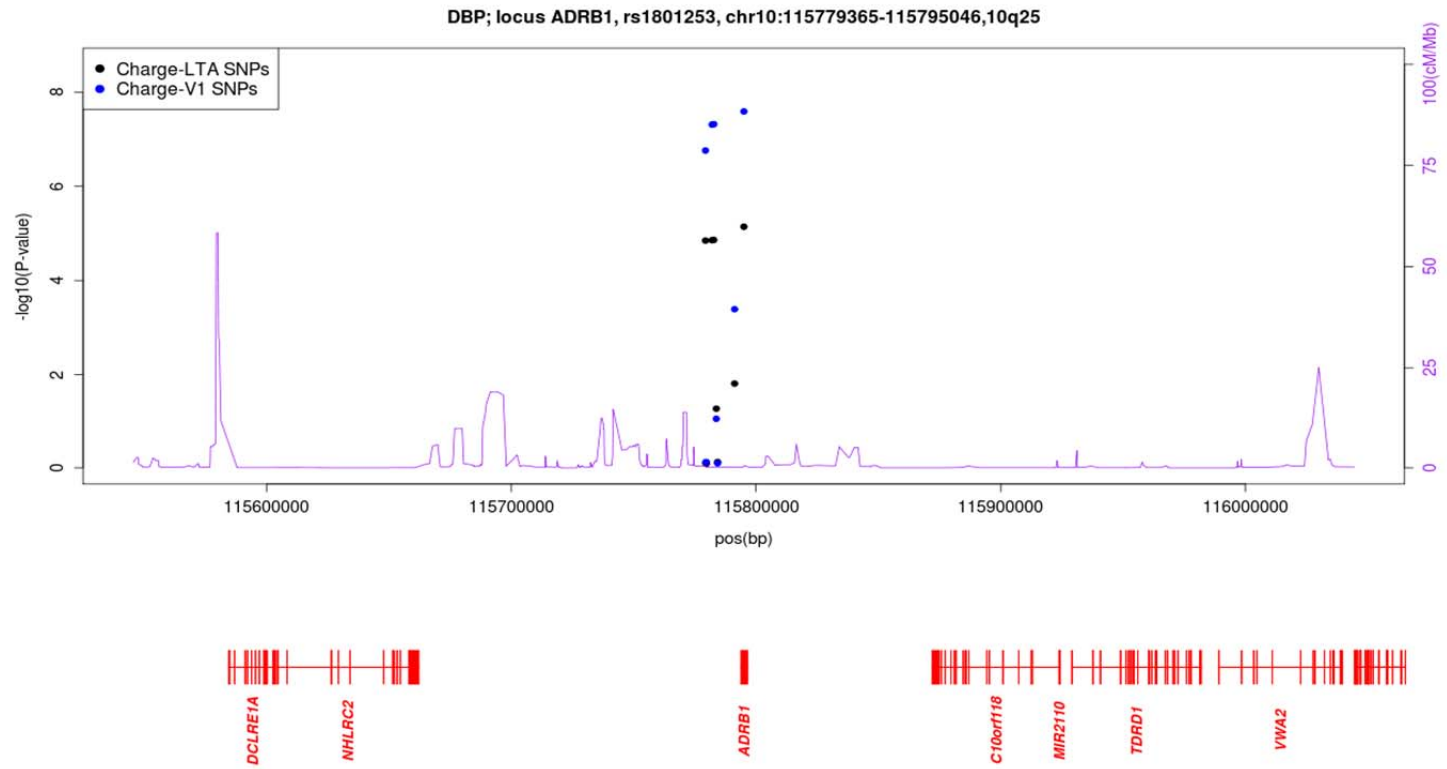

(d9)

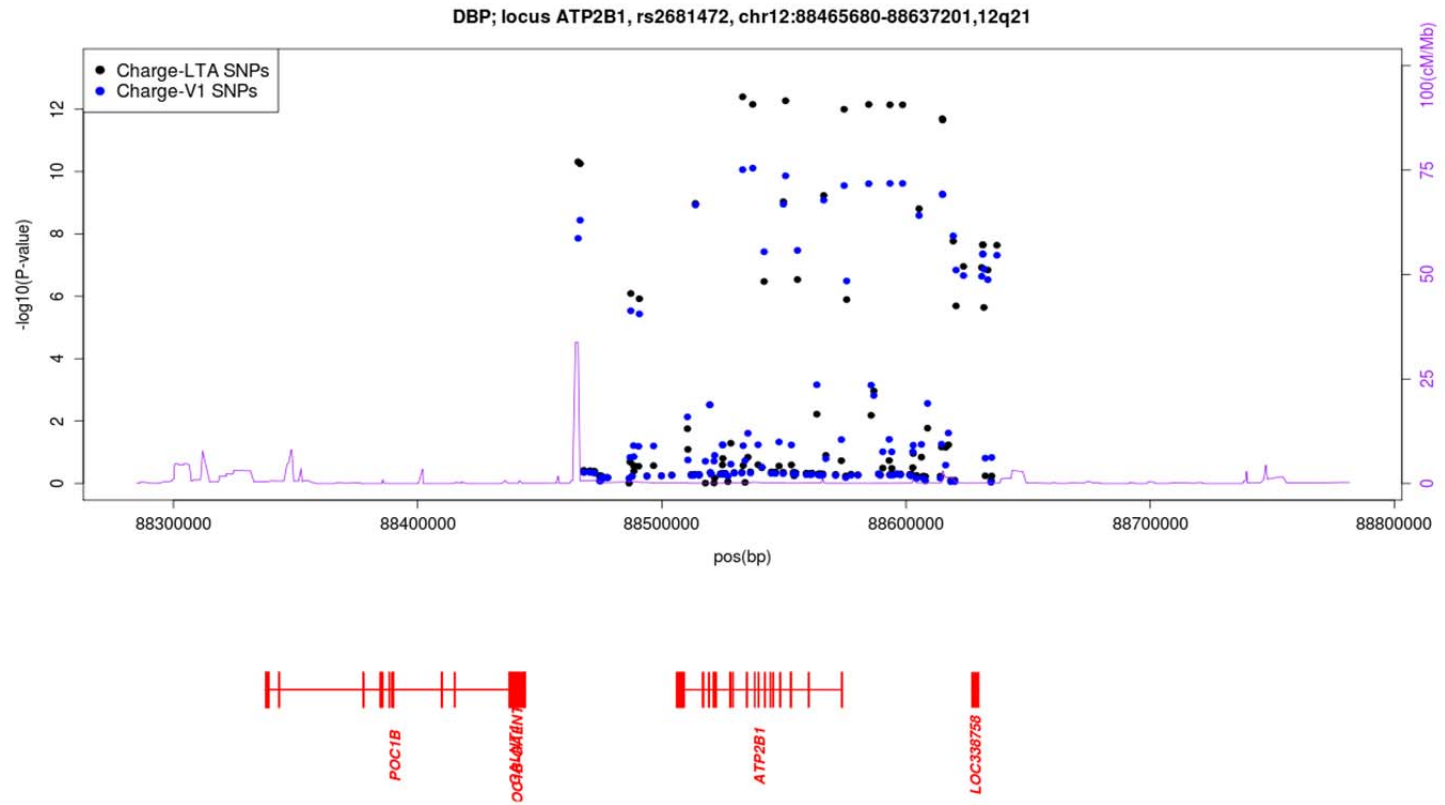

(d10)

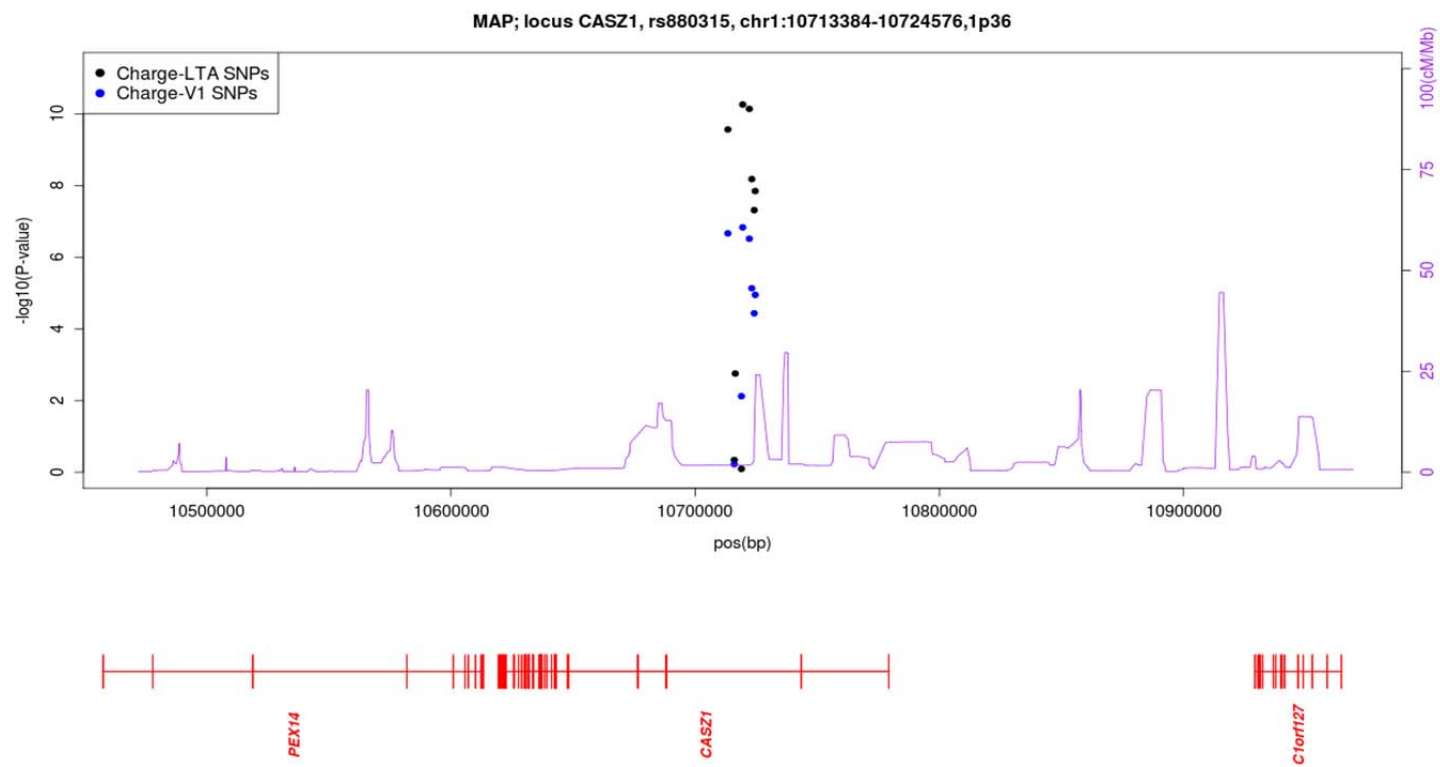

(d11)

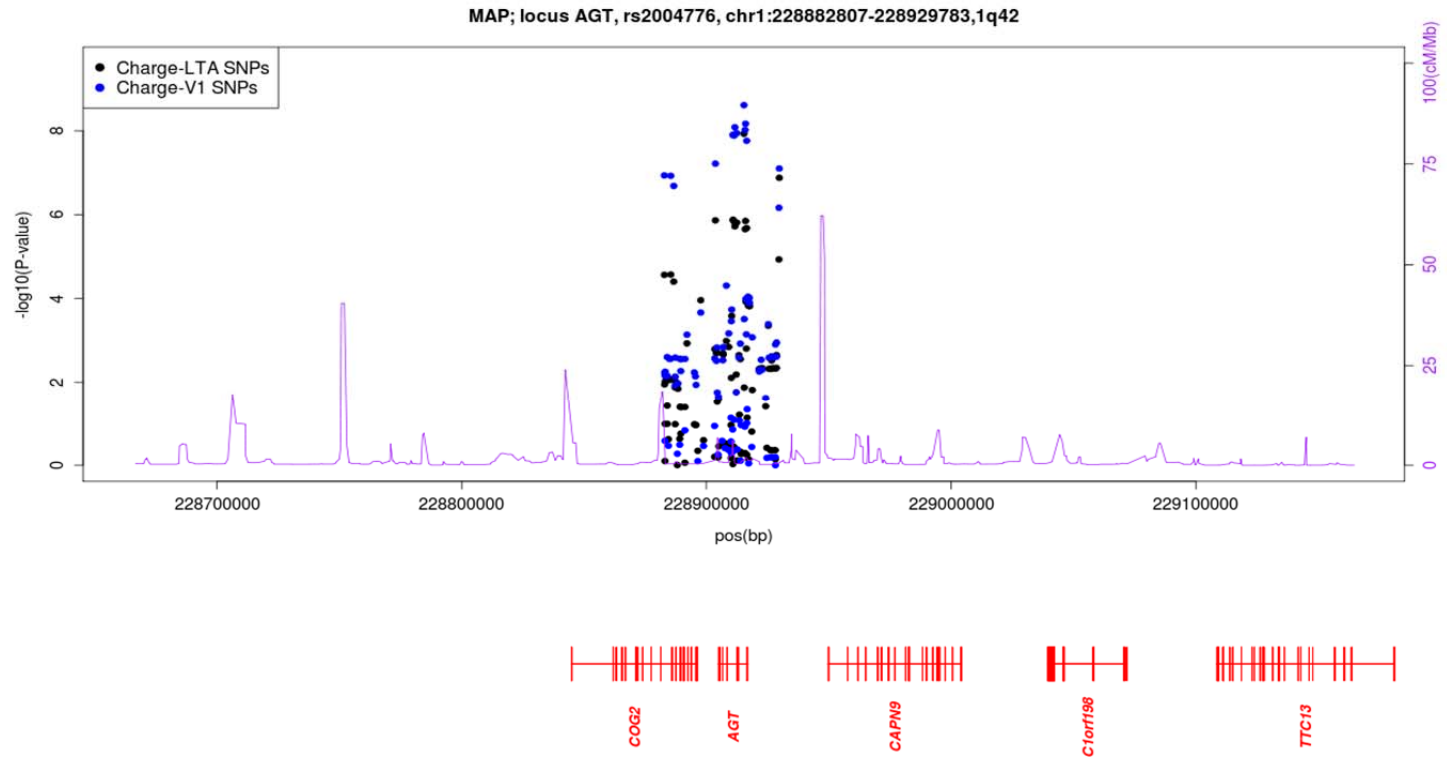



(d12)

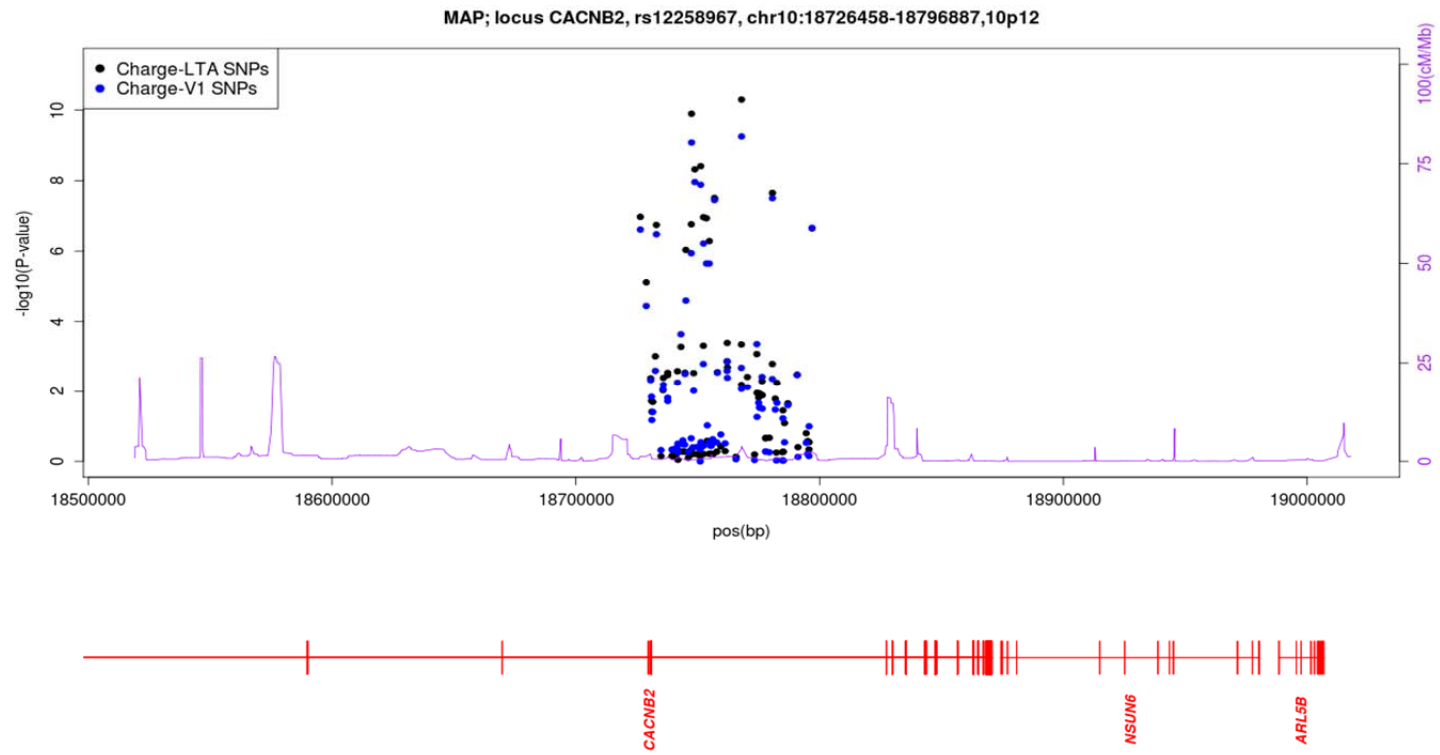

(d13)

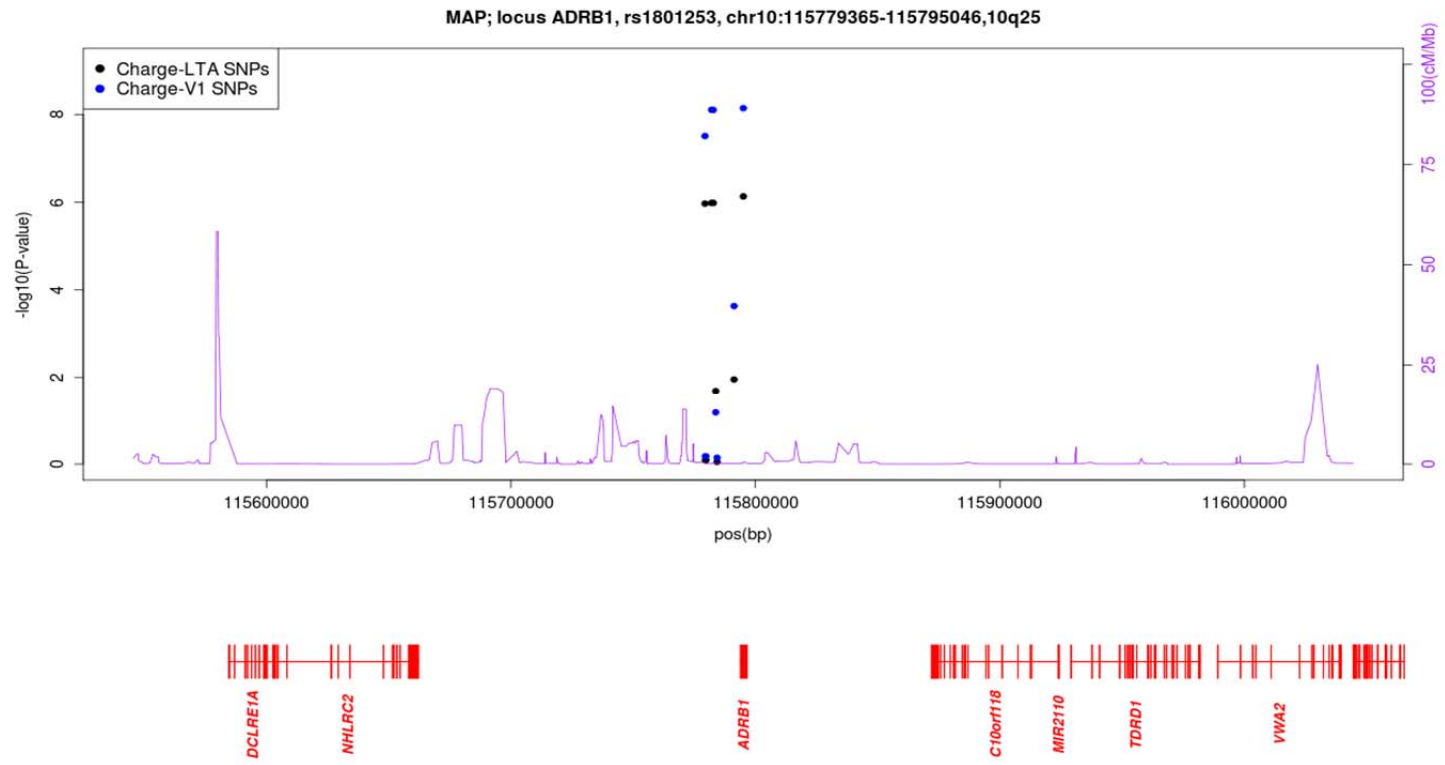

(d14)

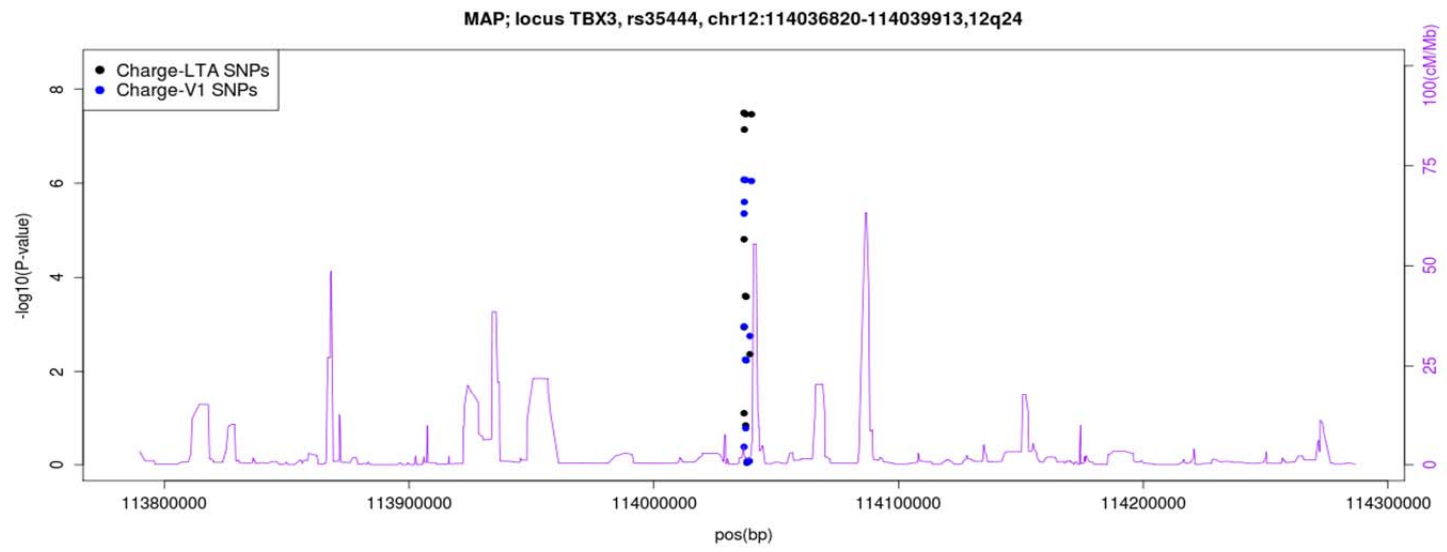

(d15)

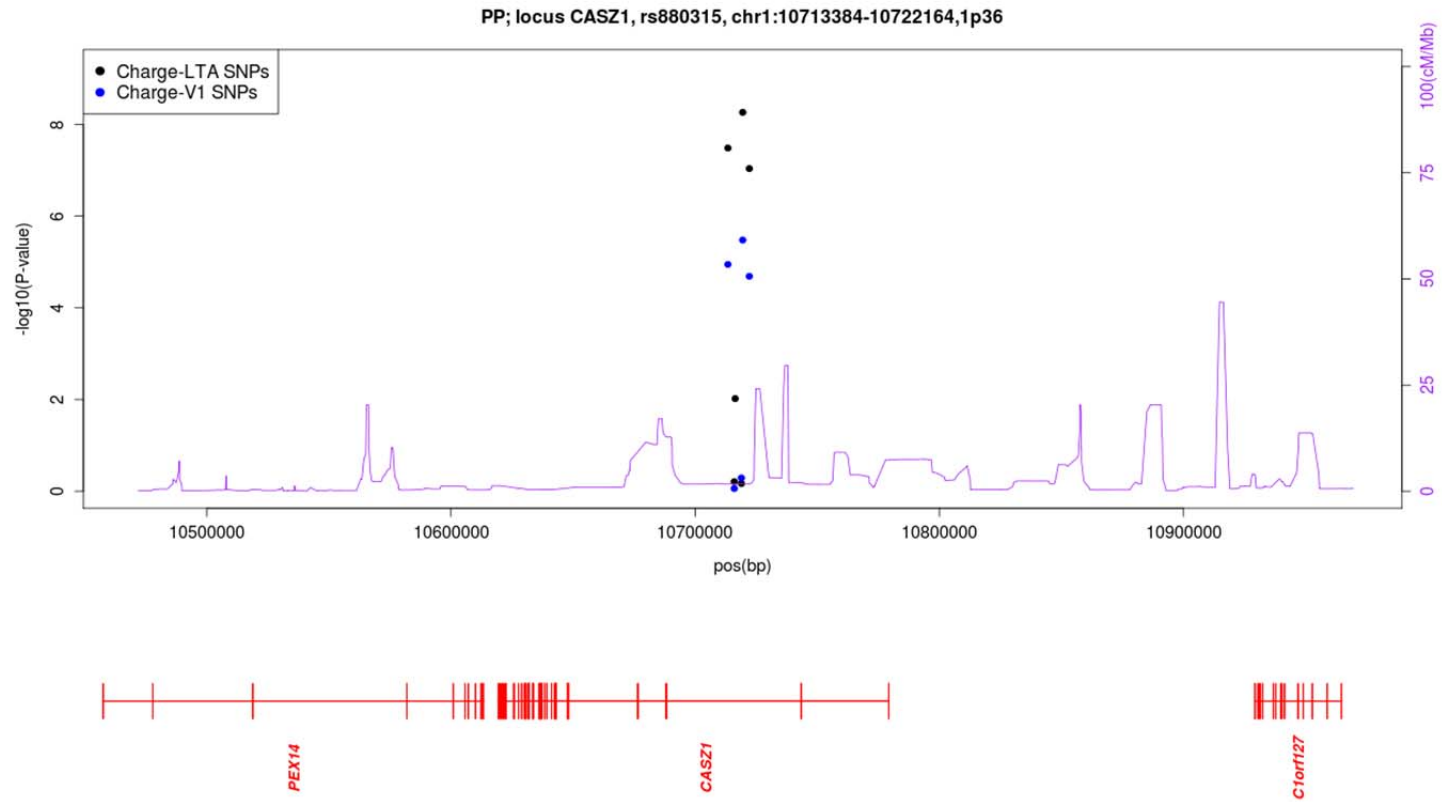

**Figure S8.** K-S test comparison cumulative fraction plot, where x-axis is the  $-\log_{10}(P)$  values and y-axis is the cumulative fraction.

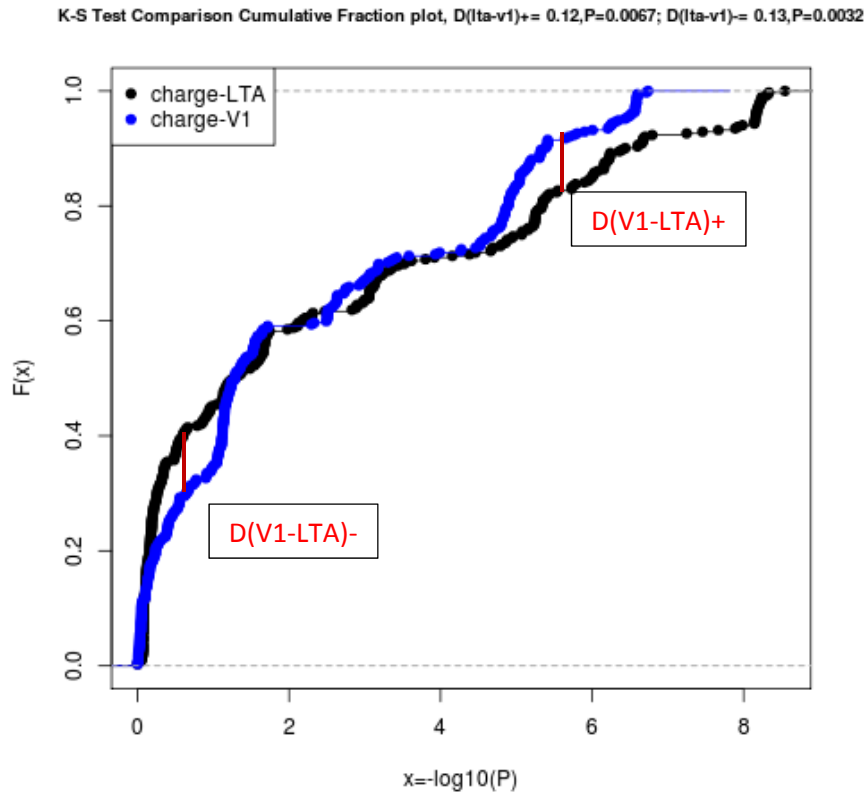

To identify regions in which the enrichment of V1 is larger than LTA or LTA larger than V1 significantly, we used the Kolmogorov-Smirnov (K-S) statistics to compare the  $-\log_{10}(P)$  values) within each region meeting criteria for genome-wide significance ( $P$  value  $< 5 \times 10^{-8}$ ). Regions with at least one marker with  $P$  value  $< 5 \times 10^{-8}$  in either LTA or V1 analysis were selected for enrichment analysis. Regions were defined as the lead SNP and by the LD-pruned list of SNPs in the region ( $r^2 > 0.3$ ). Since the KS-test uses the maximum vertical deviation between the two cumulative fraction curves as the statistic  $D$ , we used a one-tailed hypothesis test to test whether the positive vertical deviation derived from  $D(\text{cdf}(V1(X)) - \text{cdf}(LTA(X))) +$  was significant or whether the negative vertical deviation derived from  $D(\text{cdf}(V1(X)) - \text{cdf}(LTA(X))) -$  was significant, where  $X$  is the  $-\log_{10}(P)$  value).

Since the statistics based on different test directions are independent, for each region, two tests were conducted, one testing whether the LTA analysis yielded smaller  $P$  values than the V1 analysis, and vice versa. To test the structure and the strength of the K-S statistics, for each of the two tests, 10000 times permutation test was conducted by randomly shuffling the attributes of V1 and LTA and calculating new statistics repeatedly. From 10000 iterations, the permutation p-value was obtained by calculating the percentage of times when the original p-value from our data was smaller than the p-value of the new re-sampling data. Since the number of markers which selected for each region may influence the power of the K-S non-parametric test, regions with more markers may have a greater likelihood of being detected compared to regions with fewer markers. To overcome this issue, bootstrapping was used by

randomly selecting  $n$  markers from the  $N=2.5$  million whole-genome markers to do the K-S test of LTA and V1 10000 times, where  $n$  corresponds to the original number of markers we used for test in each region before. These 10000 test statistics were used as the baseline distribution, to test against whether regions with lower P values of association in the LTA or V1 analyses were truly significant compared to the distribution of the whole-genome-level baseline test statistics. Regions with true enrichment differences between LTA and V1 were identified as those with larger test statistics compared to the whole-genome-level distribution.

Two sample K-S statistics, where  $x$  is  $-\log_{10}(\text{Pvalue})$ :

$$D_{v1,LTA}^{+} = \sup x (F_{1,v1}(x) - F_{2,LTA}(x))^{+}$$

The maximum vertical positive deviation between the cdf of V1 and LTA. Deviation at each point  $X$  will be taken into account only if  $\text{cdf}(V1(X)) - \text{cdf}(LTA(X))$  is positive. This statistics means to test whether LTA has larger P-value than V1 in general.

$$D_{v1,LTA}^{-} = \sup x (F_{1,v1}(x) - F_{2,LTA}(x))^{-}$$

The maximum vertical negative deviation between the cdf of V1 and LTA. Deviation at each point  $X$  will be taken into account only if  $\text{cdf}(V1(X)) - \text{cdf}(LTA(X))$  is negative. This statistics means to test whether V1 has larger P-value than LTA in general.

**Figure S9.** Distribution of the K-S test statistics ( $D$ -,  $H1$ : V1 analysis is more enriched) from 10000 times boot-strapping of the whole-genome markers, where the number of markers selected each time is correspondence to the number used for test in CYP1A2 region in DBP analysis. The red line is the original K-S test statistics ( $D$ -) in this CYP1A2 region.

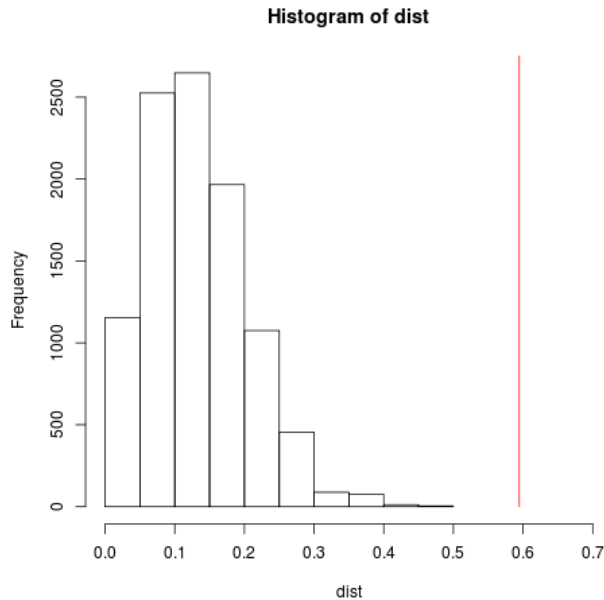

For the Bootstrapping computing method:

1. For each selected region, we identified the number of markers ( $n$ ) we used in our previous K-S test.
2. From the overall  $N=2.5$  million genome-wide markers in our LTA or V1 data, we will (i) randomly select  $n$  markers from the  $N$  complete marker pool as our test samples, or (ii) considered the 'region' to be markers in near side instead of from different far-away sites, thus we could also randomly select one marker as the position start and then select the following  $n$  markers around this one marker as our test samples.
3. Used the sample we selected in 2 to do the K-S test. Then report the test statistics.
4. Repeated step2 to step3 many times(at least 100 times, depend on the computing speed)
5. Calculated the percentage when the simulated statistics is larger than the original K-S statistics.

Suppose the genome-wide markers are the baseline, when we randomly selected the markers from them to do the test, the test statistics should be not large (in other words, should be not significant) compared to the test statistics we got from the selected region we identified as the potential change region. Therefore, the percentage when the simulated test statistics is larger than our original K-S test statistics can be seen as the bootstrapping  $P$  value. If the  $P$  value was small enough, then we can say the region we identified is truly the one with enrichment change.

**Table S1: Sample sizes available for the LTA analyses and Visit 1 analyses.**

| <b>Cohort</b> | <b>LTA Sample Size</b> | <b>Visit1 Sample Size Available</b> |
|---------------|------------------------|-------------------------------------|
| AGES          | 526                    | 3,219                               |
| ARIC          | 7,310                  | 8,778                               |
| CARDIA        | 1,671                  | 1,595                               |
| CHS           | 3,159                  | 3,295                               |
| FHS           | 3,895                  | 8,096                               |
| MESA          | 2,414                  | 2,414                               |
| RS1           | 4,710                  | 4,838                               |
| RS2           | 1,535                  | 1,535                               |
| WGHS          | 21,409                 | 21,670                              |
| <b>Total</b>  | <b>46,629</b>          | <b>55,440</b>                       |



**Table S2: Cohort summaries across all visit included in the analyses**

|               |                           | Year      | N      | Age,<br>years (sd) | BMI,<br>kg/m <sup>2</sup> (sd) | SBP,<br>mmHg (sd) | DBP,<br>mmHg (sd) | Anti-hypertensive<br>therapy (%) |
|---------------|---------------------------|-----------|--------|--------------------|--------------------------------|-------------------|-------------------|----------------------------------|
| AGES          | Visit 1 (Reykjavik Study) | 1987-1995 | 530    | 66.01 (7.0)        | 26.2 (3.9)                     | 141.4 (18.8)      | 82.1 (8.7)        | 24%                              |
| AGES          | Visit 2 (AGES)            | 2002-2005 | 530    | 78.49 (5.9)        | 26.5 (4.3)                     | 143.4 (21.2)      | 73.1 (9.8)        | 65%                              |
| ARIC          | Visit 1                   | 1986-1990 | 8,778  | 54.3 (5.7)         | 27.0 (4.9)                     | 118.5 (17.0)      | 71.7 (10.0)       | 26%                              |
| ARIC          | Visit 2                   | 1990-1993 | 7,844  | 57.2 (5.7)         | 27.4 (5.0)                     | 119.9 (17.8)      | 71.3 (9.9)        | 28%                              |
| ARIC          | Visit 3                   | 1993-1996 | 7,214  | 60.3 (5.6)         | 28.0 (5.3)                     | 122.9 (18.0)      | 70.8 (10.0)       | 33%                              |
| ARIC          | Visit 4                   | 1996-1999 | 6,582  | 63.1 (5.6)         | 28.4 (5.3)                     | 126.1 (18.4)      | 70.0 (9.9)        | 40%                              |
| CARDIA        | Visit 4                   | 1993-1994 | 1,595  | 32.6 (3.3)         | 25.6 (5.1)                     | 106.3 (11.4)      | 67.8 (9.5)        | 0.88%                            |
| CARDIA        | Visit 5                   | 1996-1997 | 1,571  | 35.6 (3.4)         | 26.1 (5.4)                     | 107.2 (11.3)      | 70.4 (9.4)        | 1.34%                            |
| CARDIA        | Visit 6                   | 2001-2002 | 1,601  | 40.7 (3.4)         | 27.2 (5.9)                     | 110.2 (13.4)      | 72.5 (10.3)       | 4.06%                            |
| CARDIA        | Visit 7                   | 2006-2007 | 1,563  | 45.8 (3.4)         | 27.9 (5.9)                     | 113.4 (13.6)      | 69.9 (10.6)       | 11.34%                           |
| CHS           | Visit 0                   | 1989-90   | 3,153  | 72.2 (5.2)         | 26.3 (4.4)                     | 134.9 (20.9)      | 70.3 (11.4)       | 35%                              |
| CHS           | Visit 1                   | 1990-91   | 3,056  | 73.1 (5.2)         | -                              | 132.2 (20.4)      | 69.3 (10.3)       | 37%                              |
| CHS           | Visit 2                   | 1992-93   | 2,991  | 74.1 (5.2)         | -                              | 133.4 (20.2)      | 69.5 (10.4)       | 39%                              |
| CHS           | Visit 3                   | 1993-94   | 2,838  | 75.0 (5.1)         | 26.4 (4.5)                     | 135.3 (20.9)      | 70.8 (10.9)       | 41%                              |
| FHS-offspring | Visit 23                  | 1992-1996 | 579    | 80.0 (4.4)         | 26.7 (4.6)                     | 148.1 (23.5)      | 72.9 (11.3)       | 49%                              |
| FHS-offspring | Visit 24                  | 1995-1998 | 525    | 82.0 (4.2)         | 26.4 (4.5)                     | 146.8 (21.7)      | 73.2 (10.7)       | 51%                              |
| FHS-offspring | Visit 25                  | 1997-1999 | 486    | 83.8 (4.1)         | 26.2 (4.6)                     | 146.9 (21.9)      | 71.8 (11.7)       | 55%                              |
| FHS-offspring | Visit 26                  | 2000-2001 | 389    | 85.6 (4.0)         | 26.2 (4.7)                     | 146.6 (22.6)      | 71.2 (11.2)       | 60%                              |
| FHS-offspring | Visit 20                  | 1986-1990 | 598    | 74.4 (4.5)         | 26.8 (4.6)                     | 150.3 (22.6)      | 78.8 (10.7)       | 43%                              |
| FHS-offspring | Visit 21                  | 1988-1992 | 606    | 76.4 (4.6)         | 27.1 (4.5)                     | 149.8 (22.3)      | 77.1 (10.7)       | 48%                              |
| FHS-offspring | Visit 22                  | 1990-1994 | 588    | 78.2 (4.4)         | 26.9 (4.7)                     | 147.8 (21.3)      | 74.6 (11.1)       | 47%                              |
| FHS           | Visit 4                   | 1987-1991 | 3,108  | 50.7 (9.8)         | 26.8 (4.9)                     | 127.4 (20.0)      | 79.7 (10.6)       | 15%                              |
| FHS           | Visit 5                   | 1991-1995 | 3,104  | 54.4 (9.8)         | 27.4 (4.9)                     | 127.4 (20.0)      | 75.4 (10.3)       | 17%                              |
| FHS           | Visit 6                   | 1995-1998 | 2,975  | 58.3 (9.7)         | 27.9 (5.1)                     | 130.6 (20.4)      | 76.8 (10.0)       | 26%                              |
| FHS           | Visit 7                   | 1998-2001 | 2,954  | 61.0 (9.5)         | 28.1 (5.3)                     | 130.1 (20.4)      | 75.7 (10.1)       | 32%                              |
| MESA          | Exam 1                    | 2000-2002 | 2,414  | 62.7               | 27.7 (5.0)                     | 123.5 (20.5)      | 70.2 (10.0)       | 33%                              |
| MESA          | Exam 2                    | 2002-2004 | 2,383  | 64.2               | 27.1 (5.1)                     | 121.1 (19.2)      | 68.8 (9.6)        | 39%                              |
| MESA          | Exam 3                    | 2004-2005 | 2,302  | 65.5               | 27.7 (5.2)                     | 120.0 (19.6)      | 68 (10.9)         | 42%                              |
| MESA          | Exam 4                    | 2005-2007 | 2,219  | 66.9               | 27.8 (5.2)                     | 120.5 (19.3)      | 68.02 (9.7)       | 45%                              |
| RS1           | Visit 1                   | 1990-1993 | 4,838  | 67.9               | 26.3 (3.6)                     | 140.4 (22.8)      | 74.9 (11.7)       | 22%                              |
| RS1           | Visit 2                   | 1994-1995 | 4,678  | 70.0               | 26.4 (3.7)                     | 144.1 (23.4)      | 78.3 (12.3)       | 30%                              |
| RS1           | Visit 3                   | 1997-1999 | 3,562  | 72.6               | 26.8 (3.9)                     | 146.0 (22.4)      | 76.4 (11.7)       | 26%                              |
| RS1           | Visit 4                   | 2002-2004 | 2,691  | 75.5               | 27.4 (4.1)                     | 156.7 (23.2)      | 81.2 (11.7)       | 37%                              |
| RS2           | Visit 1                   | 2001-2001 | 1,535  | 63.7               | 27.2 (4.1)                     | 143.4 (21.6)      | 79.7 (11.1)       | 21%                              |
| RS2           | Visit 2                   | 2004-2006 | 1,535  | 67.9               | 27.8 (4.1)                     | 148.1 (21.4)      | 81.2 (11.2)       | 30%                              |
| WGHS          | Visit 1                   | 1992-1994 | 21,670 | 54.7               | 25.9 (4.9)                     | 124.8 (15.4)      | 77.3 (9.7)        | 13%                              |
| WGHS          | Visit 2                   | 1996-1998 | 19,410 | 58.2               | 26.5 (5.1)                     | 127.3 (16.7)      | 76.8 (9.8)        | 23%                              |
| WGHS          | Visit 3                   | 2003-2005 | 18,625 | 65.2               | 26.9 (5.4)                     | 128.4 (14.7)      | 76.1 (8.9)        | 43%                              |

**Table S3: Genomic control inflation factors ( $\lambda_{GC}$ ).**

**LTA**

**LTA- SBP**

|       |       |       |       |       |       |       |       |        |               |
|-------|-------|-------|-------|-------|-------|-------|-------|--------|---------------|
| AGES  | ARIC  | CHS   | FHS   | RS1   | RS2   | WGHS  | MESA  | CARDIA | Meta-analysis |
| 1.014 | 1.052 | 1.009 | 1.061 | 1.034 | 1.002 | 1.093 | 0.996 | 1.015  | 1.074         |

**LTA - DBP**

|       |       |       |       |       |       |       |       |        |               |
|-------|-------|-------|-------|-------|-------|-------|-------|--------|---------------|
| AGES  | ARIC  | CHS   | FHS   | RS1   | RS2   | WGHS  | MESA  | CARDIA | Meta-analysis |
| 1.005 | 1.046 | 1.034 | 1.051 | 1.036 | 1.014 | 1.065 | 1.006 | 1.012  | 1.088         |

**LTA - PP**

|       |       |       |       |       |       |       |       |        |               |
|-------|-------|-------|-------|-------|-------|-------|-------|--------|---------------|
| ARIC  | CHS   | FHS   | RS1   | RS2   | AGES  | WGHS  | MESA  | CARDIA | Meta-analysis |
| 1.041 | 1.023 | 1.026 | 1.037 | 1.017 | 1.015 | 1.071 | 0.996 | 1.031  | 1.055         |

**LTA - MAP**

|       |       |       |       |       |       |       |       |        |               |
|-------|-------|-------|-------|-------|-------|-------|-------|--------|---------------|
| ARIC  | CHS   | FHS   | RS1   | RS2   | AGES  | WGHS  | MESA  | CARDIA | Meta-analysis |
| 1.048 | 1.031 | 1.022 | 1.039 | 1.006 | 1.019 | 1.101 | 0.996 | 1.008  | 1.095         |

**Visit 1**

**Visit 1 - SBP**

|       |       |       |       |       |       |       |       |        |               |
|-------|-------|-------|-------|-------|-------|-------|-------|--------|---------------|
| AGES  | ARIC  | CHS   | FHS   | RS1   | RS2   | WGHS  | MESA  | CARDIA | Meta-analysis |
| 1.014 | 1.052 | 1.009 | 1.061 | 1.034 | 1.002 | 1.093 | 0.996 | 1.025  | 1.076         |

**Visit 1 - DBP**

|       |       |       |       |       |       |       |       |        |               |
|-------|-------|-------|-------|-------|-------|-------|-------|--------|---------------|
| AGES  | ARIC  | CHS   | FHS   | RS1   | RS2   | WGHS  | MESA  | CARDIA | Meta-analysis |
| 1.005 | 1.046 | 1.034 | 1.051 | 1.036 | 1.014 | 1.065 | 1.006 | 1.025  | 1.066         |

**Table S4: All trait-SNPs with  $P$  value  $< 5 \times 10^{-8}$  in the LTA analyses ( LTA  $P$  value  $< 5 \times 10^{-8}$ , Total 488 SNPs, 117 SBP, 96 DBP, 155 MAP, and 120 PP SNPs).**

| Trait   | SNPID      | Chr   | Position  | Bui Allele1 | Allele2 | Beta    | s.e    | P        | Direction | InRefGene | RefGenes 60kbfromSNP               | ClosestRefGene | DistanceFromClosestRefGene |
|---------|------------|-------|-----------|-------------|---------|---------|--------|----------|-----------|-----------|------------------------------------|----------------|----------------------------|
| LTA-SBP | rs1275986  | 2p23  | 26765583  | a           | c       | -0.5974 | 0.0917 | 3.22E-10 | +++++>    | NA        | KCNK3,CIB4                         | KCNK3          | 3539                       |
| LTA-SBP | rs10858914 | 12q21 | 88555526  | t           | c       | 0.5902  | 0.0904 | 3.02E-10 | +++++>    | ATP2B1    | ATP2B1                             | ATP2B1         | 18449                      |
| LTA-SBP | rs7537765  | 1p36  | 11809890  | a           | g       | 0.8523  | 0.1221 | 1.60E-11 | +++++>    | CLCN6     | MTHFR,NPPA,CLCN6,NPPB              | CLCN6          | 972                        |
| LTA-SBP | rs1275979  | 2p23  | 26777072  | t           | c       | 0.5921  | 0.0919 | 5.15E-10 | +++++>    | KCNK3     | KCNK3,CIB4                         | KCNK3          | 7950                       |
| LTA-SBP | rs10858911 | 12q21 | 88487272  | a           | g       | -0.5607 | 0.0895 | 1.48E-09 | ----->    | NA        | ATP2B1,WDR51B,GALNT4               | ATP2B1         | 18686                      |
| LTA-SBP | rs7085     | 15q24 | 72882536  | t           | c       | 0.5665  | 0.0997 | 4.22E-08 | +++++>    | CSK       | CYP1A2,CSK,LMAN1,CPLX3,SCAMP2,ULK3 | CSK            | 21                         |
| LTA-SBP | rs5068     | 1p36  | 18228561  | a           | g       | 1.1766  | 0.1994 | 1.23E-08 | +++++>    | NPPA      | MTHFR,NPPA,CLCN6,NPPB              | NPPA           | 199                        |
| LTA-SBP | rs11105354 | 12q21 | 88550654  | a           | g       | 0.9429  | 0.1186 | 1.69E-14 | +++++>    | ATP2B1    | ATP2B1                             | ATP2B1         | 23321                      |
| LTA-SBP | rs13031603 | 2q24  | 164803435 | a           | c       | -0.582  | 0.0996 | 1.71E-08 | ----->    | NA        | NA                                 | GRB14          | 254143                     |
| LTA-SBP | rs10774625 | 12q24 | 110394602 | a           | g       | 0.5575  | 0.0909 | 3.25E-09 | +++++>    | ATXN2     | SH2B3,ATXN2                        | ATXN2          | 20201                      |
| LTA-SBP | rs862384   | 20q13 | 57132808  | t           | c       | 0.7241  | 0.1271 | 3.80E-08 | +++++>    | NA        | NA                                 | C20orf174      | 66661                      |
| LTA-SBP | rs6092743  | 20q13 | 57133765  | a           | g       | 0.8396  | 0.1449 | 2.25E-08 | +++++>    | NA        | NA                                 | C20orf174      | 65704                      |
| LTA-SBP | rs1173770  | 5p13  | 32858988  | t           | c       | -0.5468 | 0.0911 | 6.93E-09 | ----->    | NA        | C5orf23,NPR3                       | C5orf23        | 29392                      |
| LTA-SBP | rs6712094  | 2q24  | 164751706 | a           | g       | 0.598   | 0.1007 | 9.89E-09 | +++++>    | NA        | NA                                 | GRB14          | 305972                     |
| LTA-SBP | rs5444     | 12q24 | 114038820 | a           | g       | 0.5452  | 0.0929 | 1.47E-08 | +++++>    | NA        | NA                                 | TBX3           | 430468                     |
| LTA-SBP | rs4842666  | 12q21 | 88465680  | t           | c       | 0.8916  | 0.1267 | 1.92E-11 | +++++>    | NA        | ATP2B1,WDR51B,GALNT4               | WDR51B         | 21772                      |
| LTA-SBP | rs1173727  | 5p13  | 32866278  | t           | c       | -0.5439 | 0.0911 | 8.32E-09 | ----->    | NA        | C5orf23,NPR3                       | C5orf23        | 38702                      |
| LTA-SBP | rs17367504 | 1p36  | 11785365  | a           | g       | 0.8355  | 0.1225 | 4.60E-11 | +++++>    | MTHFR     | MTHFR,NPPA,CLCN6,NPPB,AGTRAP       | MTHFR          | 3337                       |
| LTA-SBP | rs13035163 | 2q24  | 164781173 | a           | g       | 0.5775  | 0.0996 | 2.22E-08 | +++++>    | NA        | NA                                 | GRB14          | 276405                     |
| LTA-SBP | rs13035934 | 2q24  | 164781318 | a           | g       | -0.5772 | 0.0996 | 2.25E-08 | ----->    | NA        | NA                                 | GRB14          | 276260                     |
| LTA-SBP | rs12985749 | 2q24  | 164777689 | t           | c       | -0.5795 | 0.0997 | 2.03E-08 | ----->    | NA        | NA                                 | GRB14          | 279889                     |
| LTA-SBP | rs1173747  | 5p13  | 32817909  | a           | c       | 0.512   | 0.0901 | 4.21E-08 | +++++>    | NPR3      | C5orf23,NPR3                       | NPR3           | 5100                       |
| LTA-SBP | rs7136259  | 12q21 | 88605319  | a           | c       | -0.6301 | 0.0902 | 1.60E-11 | ----->    | NA        | ATP2B1                             | ATP2B1         | 31344                      |
| LTA-SBP | rs2681485  | 12q21 | 88549753  | t           | g       | 0.687   | 0.0909 | 2.97E-13 | +++++>    | ATP2B1    | ATP2B1                             | ATP2B1         | 24222                      |
| LTA-SBP | rs1275923  | 2p23  | 26786300  | t           | c       | -0.6048 | 0.0943 | 6.02E-10 | ----->    | KCNK3     | KCNK3,C2orf118                     | KCNK3          | 11778                      |
| LTA-SBP | rs13154066 | 5p13  | 32867427  | t           | c       | -0.5436 | 0.0911 | 8.41E-09 | ----->    | NA        | C5orf23,NPR3                       | C5orf23        | 39851                      |
| LTA-SBP | rs979223   | 2q24  | 164803267 | a           | c       | -0.577  | 0.0995 | 2.23E-08 | ----->    | NA        | NA                                 | GRB14          | 254311                     |
| LTA-SBP | rs1173743  | 5p13  | 32810804  | t           | g       | 0.5212  | 0.0907 | 2.95E-08 | +++++>    | NPR3      | C5orf23,NPR3                       | NPR3           | 12205                      |
| LTA-SBP | rs12258967 | 10p12 | 18767965  | c           | g       | 0.6307  | 0.0976 | 4.53E-10 | +++++>    | CACNB2    | CACNB2                             | CACNB2         | 38447                      |
| LTA-SBP | rs13004226 | 2q24  | 164788924 | c           | g       | -0.5763 | 0.0995 | 2.28E-08 | ----->    | NA        | NA                                 | GRB14          | 268654                     |
| LTA-SBP | rs6100343  | 20q13 | 57133007  | a           | g       | 0.725   | 0.1272 | 3.76E-08 | +++++>    | NA        | NA                                 | C20orf174      | 65862                      |
| LTA-SBP | rs13030081 | 2q24  | 164796086 | t           | c       | 0.5731  | 0.1005 | 3.77E-08 | +++++>    | NA        | NA                                 | GRB14          | 261492                     |
| LTA-SBP | rs12705390 | 7q22  | 106190013 | a           | g       | 0.6307  | 0.11   | 3.17E-08 | +++++>    | NA        | NA                                 | PK3CG          | 95146                      |
| LTA-SBP | rs2586886  | 2p23  | 26785535  | t           | c       | -0.6016 | 0.0936 | 5.43E-10 | ----->    | KCNK3     | C2orf118,KCNK3                     | KCNK3          | 16413                      |
| LTA-SBP | rs12230074 | 12q21 | 88614998  | a           | g       | 0.934   | 0.1219 | 1.39E-13 | +++++>    | NA        | ATP2B1                             | ATP2B1         | 41023                      |
| LTA-SBP | rs4441488  | 2q24  | 164773873 | t           | c       | 0.5809  | 0.0998 | 1.92E-08 | +++++>    | NA        | NA                                 | GRB14          | 283705                     |
| LTA-SBP | rs11065987 | 12q24 | 110568807 | a           | g       | -0.5274 | 0.0931 | 4.50E-08 | ----->    | NA        | BRAP,ATXN2,ACAD10                  | BRAP           | 9471                       |
| LTA-SBP | rs936226   | 15q24 | 72865335  | t           | c       | -0.5733 | 0.1004 | 3.58E-08 | ----->    | NA        | CYP1A2,CYP1A1,CSK,LMAN1,CPLX3,ULK3 | CSK            | 5432                       |
| LTA-SBP | rs6707357  | 2q24  | 164722539 | t           | c       | -0.5232 | 0.0914 | 3.29E-08 | ----->    | NA        | NA                                 | GRB14          | 335039                     |
| LTA-SBP | rs680315   | 1p36  | 10719453  | t           | c       | -0.7125 | 0.1005 | 7.98E-12 | ----->    | CASZ1     | CASZ1                              | CASZ1          | 59841                      |
| LTA-SBP | rs2166122  | 10q21 | 63193080  | t           | c       | -0.6435 | 0.1137 | 4.75E-08 | ----->    | C10orf107 | C10orf107                          | C10orf107      | 3015                       |
| LTA-SBP | rs653178   | 12q24 | 110492139 | t           | c       | -0.5508 | 0.0902 | 3.76E-09 | ----->    | ATXN2     | ATXN2                              | ATXN2          | 29724                      |
| LTA-SBP | rs13034053 | 2q24  | 164794645 | a           | t       | -0.5762 | 0.0996 | 2.34E-08 | ----->    | NA        | NA                                 | GRB14          | 272933                     |
| LTA-SBP | rs4842667  | 12q21 | 88460785  | a           | g       | 0.5579  | 0.0984 | 1.69E-09 | +++++>    | NA        | ATP2B1,WDR51B,GALNT4               | ATP2B1         | 15173                      |
| LTA-SBP | rs284277   | 1p36  | 10711384  | a           | c       | -0.7091 | 0.1044 | 5.54E-11 | ----->    | CASZ1     | CASZ1                              | CASZ1          | 65910                      |
| LTA-SBP | rs1275982  | 2p23  | 26772593  | t           | c       | -0.5881 | 0.0919 | 6.56E-10 | ----->    | KCNK3     | KCNK3,CIB4                         | KCNK3          | 3471                       |
| LTA-SBP | rs6100342  | 20q13 | 57132656  | a           | c       | -0.7232 | 0.127  | 3.89E-08 | ----->    | NA        | NA                                 | C20orf174      | 66813                      |
| LTA-SBP | rs11072518 | 15q24 | 73021863  | t           | c       | 0.5692  | 0.0947 | 6.54E-09 | +++++>    | NA        | COX5A,SCAMP5,PPP25,C15orf17,MPI    | COX5A          | 4238                       |
| LTA-SBP | rs1401982  | 12q21 | 88513730  | a           | g       | 0.6828  | 0.0906 | 3.59E-13 | +++++>    | ATP2B1    | ATP2B1                             | ATP2B1         | 7772                       |
| LTA-SBP | rs998981   | 20q13 | 57133036  | t           | c       | 0.7246  | 0.1271 | 3.78E-08 | +++++>    | NA        | NA                                 | C20orf174      | 66433                      |
| LTA-SBP | rs2070759  | 12q21 | 88541867  | t           | g       | 0.5891  | 0.0902 | 3.19E-10 | +++++>    | ATP2B1    | ATP2B1                             | ATP2B1         | 32108                      |
| LTA-SBP | rs12442901 | 15q24 | 72870965  | a           | g       | 0.5675  | 0.1    | 4.34E-08 | +++++>    | CSK       | CPLX3,CYP1A2,SCAMP2,CSK,ULK3,LMAN1 | CSK            | 9188                       |
| LTA-SBP | rs11014049 | 10p12 | 18726458  | a           | g       | -0.5453 | 0.0964 | 4.77E-08 | ----->    | CACNB2    | CACNB2                             | CACNB2         | 3060                       |
| LTA-SBP | rs13306561 | 1p36  | 11788391  | a           | g       | 0.8795  | 0.1235 | 6.38E-12 | +++++>    | MTHFR     | MTHFR,NPPA,CLCN6,NPPB,AGTRAP       | MTHFR          | 311                        |
| LTA-SBP | rs1439214  | 2q24  | 164778248 | t           | c       | -0.5791 | 0.0997 | 2.07E-08 | ----->    | NA        | NA                                 | GRB14          | 279330                     |
| LTA-SBP | rs2681492  | 12q21 | 88537220  | t           | c       | 0.8967  | 0.1156 | 7.18E-14 | +++++>    | ATP2B1    | ATP2B1                             | ATP2B1         | 31262                      |
| LTA-SBP | rs2168519  | 15q24 | 72867925  | t           | c       | 0.5879  | 0.0999 | 4.18E-08 | +++++>    | CSK       | CYP1A2,CSK,LMAN1,CPLX3,SCAMP2,ULK3 | CSK            | 6158                       |
| LTA-SBP | rs1275977  | 2p23  | 26776359  | a           | g       | -0.5862 | 0.099  | 1.11E-08 | ----->    | KCNK3     | KCNK3,CIB4                         | KCNK3          | 7237                       |
| LTA-SBP | rs492945   | 1p36  | 10723185  | a           | g       | -0.5838 | 0.1005 | 2.10E-08 | ----->    | CASZ1     | CASZ1                              | CASZ1          | 56109                      |
| LTA-SBP | rs13027527 | 2q24  | 164786950 | a           | g       | -0.5768 | 0.0995 | 2.19E-08 | ----->    | NA        | NA                                 | GRB14          | 270628                     |
| LTA-SBP | rs11105364 | 12q21 | 88593407  | t           | g       | 0.9382  | 0.1197 | 3.81E-14 | +++++>    | NA        | ATP2B1                             | ATP2B1         | 19432                      |
| LTA-SBP | rs13021222 | 2q24  | 164756151 | c           | g       | -0.5902 | 0.1008 | 1.60E-08 | ----->    | NA        | NA                                 | GRB14          | 301427                     |
| LTA-SBP | rs12579302 | 12q21 | 88574634  | a           | g       | 0.9342  | 0.1194 | 4.31E-14 | +++++>    | NA        | ATP2B1                             | ATP2B1         | 659                        |
| LTA-SBP | rs35441    | 12q24 | 114037498 | t           | c       | -0.5471 | 0.0933 | 1.54E-08 | ----->    | NA        | NA                                 | TBX3           | 431146                     |
| LTA-SBP | rs17376328 | 1p36  | 11799249  | a           | g       | -1.1341 | 0.1958 | 2.26E-08 | ----->    | CLCN6     | MTHFR,NPPA,CLCN6,NPPB              | CLCN6          | 10456                      |
| LTA-SBP | rs9292408  | 5p13  | 32854830  | t           | c       | -0.5451 | 0.0911 | 7.76E-09 | ----->    | NA        | C5orf23,NPR3                       | C5orf23        | 27254                      |
| LTA-SBP | rs13006481 | 2q24  | 164789812 | t           | c       | -0.5758 | 0.0995 | 2.35E-08 | ----->    | NA        | NA                                 | GRB14          | 267968                     |
| LTA-SBP | rs4766578  | 12q24 | 110388754 | a           | t       | -0.5599 | 0.0909 | 2.82E-09 | ----->    | ATXN2     | SH2B3,ATXN2                        | ATXN2          | 14353                      |
| LTA-SBP | rs17477177 | 7q22  | 106199094 | t           | c       | -0.6322 | 0.1106 | 3.46E-08 | ----->    | NA        | NA                                 | PK3CG          | 94065                      |
| LTA-SBP | rs11105383 | 12q21 | 88631437  | t           | c       | 0.7644  | 0.1329 | 2.83E-08 | +++++>    | NA        | ATP2B1                             | ATP2B1         | 57462                      |
| LTA-SBP | rs4548524  | 10p12 | 18756873  | a           | g       | 0.544   | 0.0935 | 1.97E-08 | +++++>    | CACNB2    | CACNB2                             | CACNB2         | 27355                      |
| LTA-SBP | rs1275988  | 2p23  | 26767968  | t           | c       | -0.6004 | 0.0917 | 2.61E-10 | ----->    | NA        | KCNK3,CIB4                         | KCNK3          | 1254                       |
| LTA-SBP | rs2301249  | 15q24 | 72879437  | t           | c       | 0.566   | 0.0986 | 4.13E-08 | +++++>    | CSK       | CPLX3,CYP1A2,SCAMP2,CSK,ULK3,LMAN1 | CSK            | 3120                       |
| LTA-SBP | rs6728740  | 2q24  | 164758374 | t           | g       | 0.5849  | 0.1009 | 2.15E-08 | +++++>    | NA        | NA                                 | GRB14          | 295204                     |
| LTA-SBP | rs11687999 | 2q24  | 164774604 | t           | c       | 0.5809  | 0.0998 | 1.92E-08 | +++++>    | NA        | NA                                 | GRB14          | 282974                     |
| LTA-SBP | rs7299436  | 12q21 | 88637201  | t           | g       | 0.7872  | 0.1334 | 2.84E-08 | +++++>    | NA        | NA                                 | ATP2B1         | 63225                      |
| LTA-SBP | rs6100340  | 20q13 | 57118007  | a           | g       | -0.7158 | 0.1261 | 4.31E-08 | ----->    | NA        | NA                                 | SLMO2          | 66711                      |



| Trait   | SNPID      | Chr   | Position  | Bui Allele1 | Allele2 | Beta    | s.e.   | P        | Direction | InRefGene | RefGenes 60kbfromSNP                                                                     | ClosestRefGene | DistanceFromClosestRefGene |
|---------|------------|-------|-----------|-------------|---------|---------|--------|----------|-----------|-----------|------------------------------------------------------------------------------------------|----------------|----------------------------|
| LTA-SBP | rs8033381  | 15q24 | 72867738  | a           | g       | -0.5689 | 0.1    | 3.97E-08 | -----     | CSK       | CPLX3,CYP1A2,SCAMP2,CSK,ULK3,LMAN1L                                                      | CSK            | 5971                       |
| LTA-SBP | rs12995799 | 2q24  | 164798836 | t           | c       | 0.5788  | 0.0996 | 2.03E-08 | +++++     | NA        | NA                                                                                       | GRB14          | 258942                     |
| LTA-SBP | rs12048278 | 1p36  | 10722164  | t           | c       | -0.707  | 0.1039 | 5.12E-11 | -----     | CASZ1     | CASZ1                                                                                    | CASZ1          | 57130                      |
| LTA-SBP | rs11891401 | 2q24  | 164794993 | a           | t       | -0.5844 | 0.0997 | 1.56E-08 | -----     | NA        | NA                                                                                       | GRB14          | 262585                     |
| LTA-SBP | rs7070797  | 10q21 | 63221779  | a           | g       | -0.7415 | 0.1306 | 4.30E-08 | -----     | NA        | C10orf107                                                                                | C10orf107      | 25684                      |
| LTA-SBP | rs4896629  | 15q24 | 72859611  | c           | g       | -0.5728 | 0.1004 | 3.63E-08 | -----     | NA        | CPLX3,CYP1A2,CYP1A1,CSK,ULK3,LMAN1L                                                      | CSK            | 2156                       |
| LTA-SBP | rs7733331  | 5p13  | 32864603  | t           | c       | -0.5505 | 0.0911 | 5.38E-09 | -----     | NA        | C5orf23,NPR3                                                                             | C5orf23        | 37027                      |
| LTA-SBP | rs4845953  | 1p36  | 10724576  | a           | g       | -0.5626 | 0.0995 | 4.84E-08 | -----     | CASZ1     | CASZ1                                                                                    | CASZ1          | 54718                      |
| LTA-SBP | rs12656497 | 5p13  | 32867696  | t           | c       | -0.5432 | 0.0911 | 8.73E-09 | -----     | NA        | C5orf23,NPR3                                                                             | C5orf23        | 40120                      |
| LTA-SBP | rs17249754 | 12q21 | 89584717  | a           | g       | -0.9384 | 0.1194 | 3.37E-14 | -----     | NA        | ATP2B1                                                                                   | ATP2B1         | 10742                      |
| LTA-SBP | rs1465537  | 20q13 | 57131415  | t           | c       | 0.7232  | 0.127  | 3.86E-08 | +++++     | NA        | NA                                                                                       | C20orf174      | 88054                      |
| LTA-SBP | rs11105382 | 12q21 | 88631403  | t           | c       | 0.7637  | 0.1326 | 2.73E-08 | +++++     | NA        | ATP2B1                                                                                   | ATP2B1         | 57428                      |
| LTA-SBP | rs1275985  | 2p23  | 26765249  | t           | c       | -0.598  | 0.092  | 4.01E-10 | -----     | NA        | KCNK3,CIB4                                                                               | KCNK3          | 3873                       |
| LTA-SBP | rs1173771  | 5p13  | 32850785  | a           | g       | -0.5502 | 0.0911 | 5.03E-09 | -----     | NA        | C5orf23,NPR3                                                                             | C5orf23        | 23205                      |
| LTA-SBP | rs35432    | 12q24 | 114039913 | t           | c       | -0.5535 | 0.0945 | 1.58E-08 | -----     | NA        | NA                                                                                       | TBX3           | 433561                     |
| LTA-SBP | rs10858915 | 12q21 | 88575678  | a           | g       | 0.5191  | 0.0903 | 2.92E-08 | +++++     | NA        | ATP2B1                                                                                   | ATP2B1         | 1703                       |
| LTA-SBP | rs1438211  | 2q24  | 164802546 | a           | g       | -0.5887 | 0.1035 | 4.06E-08 | -----     | NA        | NA                                                                                       | GRB14          | 255032                     |
| LTA-SBP | rs2050265  | 1p36  | 11802296  | a           | g       | 0.8509  | 0.1222 | 1.84E-11 | +++++     | CLCN6     | MTHFR,NPPA,CLCN6,NPPB                                                                    | CLCN6          | 8576                       |
| LTA-SBP | rs11014166 | 10p12 | 18748004  | a           | t       | 0.5638  | 0.0939 | 6.89E-09 | +++++     | CACNB2    | CACNB2                                                                                   | CACNB2         | 19286                      |
| LTA-SBP | rs10774792 | 12q24 | 114036991 | t           | c       | -0.5502 | 0.094  | 1.63E-08 | -----     | NA        | NA                                                                                       | TBX3           | 430529                     |
| LTA-SBP | rs1173758  | 5p13  | 32825609  | t           | c       | -0.5175 | 0.0896 | 2.52E-08 | -----     | C5orf23   | C5orf23,NPR3                                                                             | C5orf23        | 908                        |
| LTA-SBP | rs1275980  | 2p23  | 26770473  | t           | c       | -0.5947 | 0.0919 | 4.18E-10 | -----     | KCNK3     | KCNK3,CIB4                                                                               | KCNK3          | 1351                       |
| LTA-SBP | rs1813353  | 10p12 | 18747454  | t           | c       | 0.623   | 0.0968 | 5.31E-10 | +++++     | CACNB2    | CACNB2                                                                                   | CACNB2         | 17936                      |
| LTA-SBP | rs6676300  | 1p36  | 11847887  | a           | g       | 0.5541  | 0.0942 | 1.40E-08 | +++++     | NA        | MTHFR,KIAA2013,NPPA,CLCN6,NPPB                                                           | NPPB           | 6308                       |
| LTA-SBP | rs12567136 | 1p36  | 11806318  | t           | c       | -0.8529 | 0.1222 | 1.63E-11 | -----     | CLCN6     | MTHFR,NPPA,CLCN6,NPPB                                                                    | CLCN6          | 4544                       |
| LTA-SBP | rs2681472  | 12q21 | 88633090  | a           | g       | 0.9467  | 0.118  | 1.04E-11 | +++++     | ATP2B1    | ATP2B1                                                                                   | ATP2B1         | 27132                      |
| LTA-SBP | rs17037425 | 1p36  | 11782970  | a           | g       | -0.8574 | 0.1292 | 1.51E-10 | -----     | CLCN6     | MTHFR,NPPA,CLCN6,NPPB,AGTRAP                                                             | CLCN6          | 4177                       |
| LTA-SBP | rs1371181  | 2q24  | 164784974 | t           | c       | 0.5764  | 0.0995 | 2.28E-08 | +++++     | NA        | NA                                                                                       | GRB14          | 272604                     |
| LTA-SBP | rs10432461 | 2q24  | 164772752 | a           | t       | -0.5812 | 0.0998 | 1.93E-08 | -----     | NA        | NA                                                                                       | GRB14          | 284826                     |
| LTA-SBP | rs3184504  | 12q24 | 110368991 | t           | c       | 0.5549  | 0.0903 | 3.04E-09 | +++++     | SH2B3     | SH2B3,ATXN2                                                                              | SH2B3          | 4818                       |
| LTA-SBP | rs11105388 | 12q21 | 88598572  | c           | g       | -0.9371 | 0.1197 | 4.21E-14 | -----     | NA        | ATP2B1                                                                                   | ATP2B1         | 24597                      |
| LTA-SBP | rs13007966 | 2q24  | 164784819 | t           | c       | -0.5782 | 0.0996 | 2.33E-08 | -----     | NA        | NA                                                                                       | GRB14          | 272759                     |
| LTA-SBP | rs11105378 | 12q21 | 88614872  | t           | c       | -0.9344 | 0.1216 | 1.23E-13 | -----     | NA        | ATP2B1                                                                                   | ATP2B1         | 40897                      |
| LTA-SBP | rs11105328 | 12q21 | 88466521  | a           | g       | 0.8055  | 0.1239 | 1.57E-11 | +++++     | NA        | ATP2B1,WDR51B,GALNT4                                                                     | WDR51B         | 22613                      |
| LTA-SBP | rs1898841  | 2q24  | 164778453 | t           | c       | 0.5785  | 0.0997 | 2.12E-08 | +++++     | NA        | NA                                                                                       | GRB14          | 279125                     |
| LTA-SBP | rs11105379 | 12q21 | 88619304  | t           | c       | 0.7704  | 0.1325 | 2.03E-08 | +++++     | NA        | ATP2B1                                                                                   | ATP2B1         | 45329                      |
| LTA-SBP | rs11105358 | 12q21 | 88566273  | c           | g       | -0.6895 | 0.0911 | 2.77E-13 | -----     | ATP2B1    | ATP2B1                                                                                   | ATP2B1         | 7702                       |
| LTA-SBP | rs17037390 | 1p36  | 11783430  | a           | g       | -0.8558 | 0.1226 | 1.60E-11 | -----     | MTHFR     | MTHFR,NPPA,CLCN6,NPPB,AGTRAP                                                             | MTHFR          | 5272                       |
| LTA-SBP | rs1173766  | 5p13  | 32840285  | t           | c       | -0.5294 | 0.0917 | 2.52E-08 | -----     | NA        | C5orf23,NPR3                                                                             | C5orf23        | 12709                      |
| LTA-SBP | rs11014171 | 10p12 | 18751201  | t           | c       | -0.5679 | 0.0937 | 4.97E-09 | -----     | CACNB2    | CACNB2                                                                                   | CACNB2         | 21683                      |
| LTA-DBP | rs11072512 | 15q24 | 72991079  | t           | c       | -0.3193 | 0.0525 | 5.53E-09 | -----     | NA        | COX5A,SCAMP2,RPP25,C15orf17,MPI                                                          | C15orf17       | 4564                       |
| LTA-DBP | rs7495739  | 15q24 | 72972723  | a           | g       | 0.3158  | 0.0524 | 7.78E-09 | +++++     | MPI       | COX5A,SCAMP2,C15orf17,MPI,ULK3                                                           | MPI            | 3261                       |
| LTA-DBP | rs7537765  | 1p36  | 11809890  | a           | g       | 0.4718  | 0.0714 | 2.36E-10 | +++++     | CLCN6     | MTHFR,NPPA,CLCN6,NPPB                                                                    | CLCN6          | 972                        |
| LTA-DBP | rs79085    | 15q24 | 72825336  | t           | c       | 0.3468  | 0.0592 | 1.10E-08 | +++++     | CSK       | CYP1A2,CSK,LMAN1L,CPLX3,SCAMP2,ULK3                                                      | CSK            | 21                         |
| LTA-DBP | rs198833   | 6p22  | 26222487  | a           | g       | -0.4345 | 0.0741 | 1.91E-08 | -----     | NA        | HIST1H1T,HIST1H2B,HIST1H2C,HIST1H1E,HFE,HIST1H1C,HIST1H4C,HIST1H2AC                      | HIST1H1T       | 6144                       |
| LTA-DBP | rs6486127  | 15q24 | 72861543  | t           | c       | 0.3262  | 0.0571 | 4.40E-08 | -----     | C15orf17  | COX5A,MPI,SCAMP2,RPP25,C15orf17,ULK3                                                     | C15orf17       | 2163                       |
| LTA-DBP | rs11105354 | 12q21 | 88550654  | a           | g       | 0.5235  | 0.0696 | 5.40E-13 | +++++     | ATP2B1    | ATP2B1                                                                                   | ATP2B1         | 2321                       |
| LTA-DBP | rs12246717 | 10q21 | 63129189  | t           | c       | 0.3693  | 0.0624 | 1.39E-08 | +++++     | C10orf107 | C10orf107                                                                                | C10orf107      | 36465                      |
| LTA-DBP | rs10774625 | 12q24 | 110394802 | a           | g       | 0.3848  | 0.0528 | 2.74E-12 | +++++     | ATXN2     | SH2B3,ATXN2                                                                              | ATXN2          | 20201                      |
| LTA-DBP | rs6092743  | 20q13 | 57133765  | a           | g       | 0.502   | 0.0843 | 1.11E-08 | +++++     | NA        | NA                                                                                       | C20orf174      | 85704                      |
| LTA-DBP | rs11634474 | 15q24 | 72903237  | c           | g       | 0.3384  | 0.0593 | 4.51E-08 | +++++     | LMAN1L    | CSK,LMAN1L,CPLX3,SCAMP2,ULK3                                                             | LMAN1L         | 1914                       |
| LTA-DBP | rs4886636  | 15q24 | 72983229  | a           | g       | -0.3123 | 0.0524 | 1.13E-08 | -----     | C15orf17  | COX5A,MPI,SCAMP2,RPP25,C15orf17                                                          | C15orf17       | 3286                       |
| LTA-DBP | rs3784789  | 15q24 | 72869605  | c           | g       | 0.3166  | 0.0553 | 3.98E-08 | +++++     | CSK       | CYP1A2,CSK,LMAN1L,CPLX3,SCAMP2,ULK3                                                      | CSK            | 7838                       |
| LTA-DBP | rs4842666  | 12q21 | 88465680  | t           | c       | 0.5108  | 0.0745 | 4.88E-11 | +++++     | NA        | ATP2B1,WDR51B,GALNT4                                                                     | WDR51B         | 21772                      |
| LTA-DBP | rs17367504 | 1p36  | 11785365  | a           | g       | 0.4598  | 0.0717 | 7.61E-10 | +++++     | MTHFR     | MTHFR,NPPA,CLCN6,NPPB,AGTRAP                                                             | MTHFR          | 3337                       |
| LTA-DBP | rs11072511 | 15q24 | 72946486  | a           | g       | 0.3165  | 0.0525 | 7.35E-09 | +++++     | SCAMP2    | COX5A,MPI,LMAN1L,CPLX3,SCAMP2,C15orf17,ULK3                                              | SCAMP2         | 6237                       |
| LTA-DBP | rs17696736 | 12q24 | 110971201 | a           | g       | -0.3131 | 0.0536 | 2.16E-08 | -----     | C12orf30  | ERP29,TMEM116,C12orf30                                                                   | C12orf30       | 23235                      |
| LTA-DBP | rs7136259  | 12q21 | 88605319  | t           | c       | -0.3314 | 0.0526 | 1.55E-09 | -----     | NA        | ATP2B1                                                                                   | ATP2B1         | 31344                      |
| LTA-DBP | rs2681485  | 12q21 | 88549753  | a           | g       | 0.3385  | 0.053  | 9.22E-10 | +++++     | ATP2B1    | ATP2B1                                                                                   | ATP2B1         | 24222                      |
| LTA-DBP | rs1799945  | 6p22  | 26199158  | c           | g       | -0.4226 | 0.074  | 4.33E-08 | -----     | HFE       | HIST1H2BC,HIST1H1C,HIST1H3B,HIST1H4C,HIST1H2BB,HIST1H2AC,HIST1H1T,HIST1H2AB,HFE,HIST1H3C | HFE            | 3671                       |
| LTA-DBP | rs2120702  | 10q21 | 63192664  | a           | t       | -0.3402 | 0.0592 | 3.56E-08 | -----     | C10orf107 | CYP1A2,CYP1A1,CSK,LMAN1L,CPLX3,SCAMP2,ULK3                                               | C10orf107      | 3431                       |
| LTA-DBP | rs12258967 | 10p12 | 18767965  | c           | g       | 0.3548  | 0.0571 | 2.48E-09 | +++++     | CACNB2    | CACNB2                                                                                   | CACNB2         | 38447                      |
| LTA-DBP | rs16916504 | 10q21 | 63122962  | a           | g       | 0.3706  | 0.0625 | 1.30E-08 | +++++     | C10orf107 | C10orf107                                                                                | C10orf107      | 30238                      |
| LTA-DBP | rs6485126  | 15q24 | 72962079  | a           | g       | 0.3253  | 0.0568 | 4.03E-08 | +++++     | NA        | COX5A,MPI,LMAN1L,CPLX3,SCAMP2,C15orf17,ULK3                                              | MPI            | 7383                       |
| LTA-DBP | rs7599598  | 2q11  | 96715567  | a           | g       | -0.314  | 0.0543 | 2.91E-08 | -----     | NA        | FLJ10081,FER1L5,LMAN2L                                                                   | FER1L5         | 9353                       |
| LTA-DBP | rs12230074 | 12q21 | 88614998  | a           | g       | 0.5255  | 0.0718 | 2.23E-12 | +++++     | NA        | ATP2B1                                                                                   | ATP2B1         | 41023                      |
| LTA-DBP | rs11066188 | 12q24 | 111095097 | a           | g       | 0.3343  | 0.0539 | 2.76E-09 | +++++     | NA        | TRAFD1                                                                                   | TRAFD1         | 19302                      |
| LTA-DBP | rs1378941  | 15q24 | 72867203  | a           | g       | -0.3135 | 0.0551 | 4.98E-08 | -----     | CSK       | CYP1A2,CSK,LMAN1L,CPLX3,SCAMP2,ULK3                                                      | CSK            | 5436                       |
| LTA-DBP | rs11065987 | 12q24 | 110565807 | a           | g       | -0.3534 | 0.0643 | 4.52E-10 | -----     | NA        | BRAP,ATXN2,ACAD10                                                                        | BRAP           | 9471                       |
| LTA-DBP | rs936226   | 15q24 | 72865335  | t           | c       | -0.3413 | 0.0585 | 2.26E-08 | -----     | NA        | CYP1A2,CYP1A1,CSK,LMAN1L,CPLX3,ULK3                                                      | CSK            | 5432                       |
| LTA-DBP | rs2166122  | 10q21 | 63193080  | t           | c       | -0.3932 | 0.0663 | 1.32E-08 | -----     | C10orf107 | C10orf107                                                                                | C10orf107      | 3015                       |
| LTA-DBP | rs653178   | 12q24 | 110492139 | t           | c       | -0.3911 | 0.0524 | 7.85E-13 | -----     | ATXN2     | ATXN2                                                                                    | ATXN2          | 29724                      |
| LTA-DBP | rs1378942  | 15q24 | 72864420  | a           | c       | -0.3128 | 0.055  | 5.00E-08 | -----     | CSK       | CYP1A2,CYP1A1,CSK,LMAN1L,CPLX3,SCAMP2,ULK3                                               | CSK            | 2653                       |
| LTA-DBP | rs11066320 | 12q24 | 111390788 | a           | g       | 0.303   | 0.053  | 4.11E-08 | +++++     | PTPN11    | RPI1,PTPN11                                                                              | PTPN11         | 41301                      |
| LTA-DBP | rs2875612  | 10q21 | 63163272  | t           | c       | -0.3502 | 0.0593 | 1.47E-08 | -----     | C10orf107 | C10orf107                                                                                | C10orf107      | 2823                       |
| LTA-DBP | rs3765095  | 15q24 | 72927907  | a           | g       | -0.3368 | 0.0563 | 7.81E-09 | -----     | SCAMP2    | CPLX3,SCAMP2,C15orf17,MPI,CSK,ULK3,LMAN1L                                                | SCAMP2         | 3658                       |
| LTA-DBP | rs260014   | 20q13 | 57192854  | t           | c       | -0.4584 | 0.0782 | 1.92E-08 | -----     | NA        | C20orf174                                                                                | C2             |                            |

| Trait   | SNPID      | Chr   | Position  | Bui Allele1 | Allele2 | Beta    | s.e.   | P        | Direction | InRefGene                                                             | RefGenes 60kbfromSNP                                                           | ClosestRefGene | DistanceFromClosestRefGene |
|---------|------------|-------|-----------|-------------|---------|---------|--------|----------|-----------|-----------------------------------------------------------------------|--------------------------------------------------------------------------------|----------------|----------------------------|
| LTA-DBP | rs1401962  | 12q21 | 88513730  | a           | g       | 0.3363  | 0.0529 | 1.06E-09 | +++++*    | ATP2B1                                                                | ATP2B1                                                                         | ATP2B1         | 7772                       |
| LTA-DBP | rs11630918 | 15q24 | 72942949  | t           | c       | -0.3242 | 0.0537 | 7.28E-09 | -----     | SCAMP2                                                                | COX5A,MP1,LMAN1L,CPLX3,SCAMP2,C15orf17,ULK3                                    | SCAMP2         | 9774                       |
| LTA-DBP | rs12442901 | 15q24 | 72870965  | a           | g       | 0.3399  | 0.0583 | 2.30E-08 | +++++*    | CSK                                                                   | CPLX3,CYP1A2,SCAMP2,CSK,ULK3,LMAN1L                                            | CSK            | 9188                       |
| LTA-DBP | rs13306661 | 1p36  | 11788391  | a           | g       | 0.4789  | 0.0723 | 2.08E-10 | +++++*    | MTHFR                                                                 | MTHFR,NPPA,CLCN6,NPPB,AGTRAP                                                   | MTHFR          | 311                        |
| LTA-DBP | rs11072513 | 15q24 | 73008021  | t           | c       | -0.3223 | 0.0526 | 4.20E-09 | -----     | COX5A                                                                 | COX5A,MP1,SCAMP2,PPP25,C15orf17                                                | COX5A          | 8350                       |
| LTA-DBP | rs2681492  | 12q21 | 88537220  | t           | c       | 0.5064  | 0.0676 | 7.02E-13 | +++++*    | ATP2B1                                                                | ATP2B1                                                                         | ATP2B1         | 31262                      |
| LTA-DBP | rs2168519  | 15q24 | 72867925  | t           | c       | 0.3402  | 0.0583 | 2.19E-08 | +++++*    | CSK                                                                   | CYP1A2,CSK,LMAN1L,CPLX3,SCAMP2,ULK3                                            | CSK            | 6158                       |
| LTA-DBP | rs2393833  | 10q21 | 63115322  | t           | c       | -0.3697 | 0.0624 | 1.36E-08 | -----     | C10orf107                                                             | C10orf107                                                                      | C10orf107      | 22598                      |
| LTA-DBP | rs2004776  | 1q42  | 228915325 | t           | c       | 0.3545  | 0.0615 | 3.20E-08 | +++++*    | AGT                                                                   | AGT,COG2,CAPN9                                                                 | AGT            | 1239                       |
| LTA-DBP | rs4886933  | 15q24 | 72965260  | a           | g       | -0.3276 | 0.057  | 3.49E-08 | -----     | NA                                                                    | COX5A,CPLX3,SCAMP2,C15orf17,MP1,ULK3                                           | MP1            | 4202                       |
| LTA-DBP | rs11856413 | 15q24 | 72989845  | a           | g       | 0.3183  | 0.0525 | 5.94E-09 | +++++*    | NA                                                                    | COX5A,SCAMP2,RPP25,C15orf17,MP1                                                | C15orf17       | 4300                       |
| LTA-DBP | rs1133322  | 15q24 | 72999410  | a           | g       | 0.3205  | 0.0526 | 4.98E-09 | +++++*    | NA                                                                    | COX5A,MP1,SCAMP2,RPP25,C15orf17                                                | COX5A          | 261                        |
| LTA-DBP | rs11105364 | 12q21 | 88593407  | t           | g       | 0.5264  | 0.0704 | 7.24E-13 | +++++*    | NA                                                                    | ATP2B1                                                                         | ATP2B1         | 19432                      |
| LTA-DBP | rs12579302 | 12q21 | 88574634  | a           | g       | 0.5218  | 0.0702 | 1.01E-12 | +++++*    | NA                                                                    | ATP2B1                                                                         | ATP2B1         | 659                        |
| LTA-DBP | rs1224842  | 10q21 | 63109192  | t           | g       | -0.3784 | 0.0527 | 7.05E-09 | -----     | C10orf107                                                             | C10orf107                                                                      | C10orf107      | 16468                      |
| LTA-DBP | rs4766579  | 12q24 | 110388754 | a           | t       | -0.3848 | 0.0528 | 2.71E-12 | -----     | ATXN2                                                                 | SH2B3,ATXN2                                                                    | ATXN2          | 14353                      |
| LTA-DBP | rs11105383 | 12q21 | 88631437  | t           | c       | 0.4525  | 0.0776 | 2.28E-08 | +++++*    | NA                                                                    | ATP2B1                                                                         | ATP2B1         | 57482                      |
| LTA-DBP | rs1892625  | 10q21 | 63190704  | t           | c       | -0.3911 | 0.0662 | 1.48E-08 | -----     | C10orf107                                                             | C10orf107                                                                      | C10orf107      | 5391                       |
| LTA-DBP | rs1133323  | 15q24 | 72999278  | t           | c       | -0.3262 | 0.0526 | 2.66E-09 | -----     | NA                                                                    | COX5A,MP1,SCAMP2,RPP25,C15orf17                                                | COX5A          | 393                        |
| LTA-DBP | rs1378940  | 15q24 | 72870547  | a           | c       | -0.3159 | 0.0554 | 4.44E-08 | -----     | CSK                                                                   | CPLX3,CYP1A2,SCAMP2,CSK,ULK3,LMAN1L                                            | CSK            | 8780                       |
| LTA-DBP | rs2301249  | 15q24 | 72879437  | t           | c       | 0.3479  | 0.0581 | 9.48E-09 | +++++*    | CSK                                                                   | CPLX3,CYP1A2,SCAMP2,CSK,ULK3,LMAN1L                                            | CSK            | 3120                       |
| LTA-DBP | rs1127798  | 15q24 | 72980057  | t           | c       | 0.3152  | 0.0525 | 8.37E-09 | +++++*    | C15orf17                                                              | COX5A,SCAMP2,RPP25,C15orf17,MP1,ULK3                                           | C15orf17       | 677                        |
| LTA-DBP | rs7497393  | 15q24 | 72962510  | c           | g       | -0.3172 | 0.0524 | 6.62E-09 | -----     | NA                                                                    | COX5A,MP1,LMAN1L,CPLX3,SCAMP2,C15orf17,ULK3                                    | MP1            | 6952                       |
| LTA-DBP | rs7299436  | 12q21 | 88637201  | t           | c       | 0.4541  | 0.0779 | 2.30E-08 | +++++*    | NA                                                                    | NA                                                                             | ATP2B1         | 63226                      |
| LTA-DBP | rs7162232  | 15q24 | 72902948  | a           | g       | -0.3388 | 0.0593 | 4.35E-08 | -----     | LMAN1L                                                                | CPLX3,SCAMP2,CSK,ULK3,LMAN1L                                                   | LMAN1L         | 2203                       |
| LTA-DBP | rs189846   | 6p22  | 26216142  | a           | g       | 0.4337  | 0.0738 | 1.73E-08 | +++++*    | HIST1H2BD,HIST1H2BC,HIST1H1E,HIST1H1C,HIST1H1C,HIST1H2AC,HIST1H1T,HFE | HIST1H1T                                                                       | 177            |                            |
| LTA-DBP | rs8033381  | 15q24 | 72867738  | a           | g       | -0.3403 | 0.0583 | 2.17E-08 | -----     | CSK                                                                   | CPLX3,CYP1A2,SCAMP2,CSK,ULK3,LMAN1L                                            | CSK            | 5971                       |
| LTA-DBP | rs260013   | 20q13 | 5194118   | a           | g       | -0.4565 | 0.0783 | 2.31E-08 | -----     | NA                                                                    | C20orf174                                                                      | C20orf174      | 5351                       |
| LTA-DBP | rs3750727  | 10q21 | 63114411  | a           | g       | 0.3782  | 0.0626 | 7.09E-09 | +++++*    | C10orf107                                                             | C10orf107                                                                      | C10orf107      | 21687                      |
| LTA-DBP | rs7070797  | 10q21 | 63221779  | a           | g       | -0.4387 | 0.0761 | 3.30E-08 | -----     | C10orf107                                                             | C10orf107                                                                      | C10orf107      | 25684                      |
| LTA-DBP | rs4886829  | 15q24 | 72859611  | c           | g       | -0.341  | 0.0585 | 2.29E-08 | -----     | NA                                                                    | CPLX3,CYP1A2,CYP1A1,CSK,ULK3,LMAN1L                                            | CSK            | 2156                       |
| LTA-DBP | rs17249754 | 12q21 | 88584717  | a           | g       | -0.5256 | 0.0702 | 7.08E-13 | -----     | NA                                                                    | ATP2B1                                                                         | ATP2B1         | 10742                      |
| LTA-DBP | rs11105382 | 12q21 | 88631403  | t           | c       | 0.4519  | 0.0774 | 2.21E-08 | +++++*    | NA                                                                    | ATP2B1                                                                         | ATP2B1         | 57428                      |
| LTA-DBP | rs936230   | 15q24 | 72932151  | t           | c       | 0.3335  | 0.0586 | 4.98E-08 | +++++*    | SCAMP2                                                                | MP1,CSK,LMAN1L,CPLX3,SCAMP2,C15orf17,ULK3                                      | SCAMP2         | 7902                       |
| LTA-DBP | rs11066301 | 12q24 | 111355755 | a           | g       | 0.304   | 0.0532 | 4.18E-08 | -----     | PTPN11                                                                | RLP6,PTPN11                                                                    | PTPN11         | 14837                      |
| LTA-DBP | rs2588992  | 10q21 | 63184677  | t           | c       | -0.3768 | 0.066  | 4.41E-08 | -----     | C10orf107                                                             | C10orf107                                                                      | C10orf107      | 11418                      |
| LTA-DBP | rs1130741  | 15q24 | 72976983  | a           | g       | 0.3154  | 0.0525 | 8.20E-09 | +++++*    | MP1                                                                   | COX5A,SCAMP2,RPP25,C15orf17,MP1,ULK3                                           | MP1            | 635                        |
| LTA-DBP | rs2050265  | 1p36  | 11802286  | a           | g       | 0.4709  | 0.0715 | 2.68E-10 | +++++*    | CLCN6                                                                 | MTHFR,NPPA,CLCN6,NPPB                                                          | CLCN6          | 876                        |
| LTA-DBP | rs8042694  | 15q24 | 73012468  | a           | g       | -0.3311 | 0.0573 | 2.97E-08 | -----     | COX5A                                                                 | COX5A,MP1,SCAMP2,RPP25,C15orf17                                                | COX5A          | 4957                       |
| LTA-DBP | rs1813353  | 10p12 | 18747454  | t           | c       | 0.342   | 0.0586 | 6.84E-09 | +++++*    | CACNB2                                                                | CACNB2                                                                         | CACNB2         | 17936                      |
| LTA-DBP | rs129128   | 6p22  | 26233321  | t           | c       | -0.4462 | 0.0749 | 1.10E-08 | -----     | NA                                                                    | HIST1H2BD,HIST1H2BC,HIST1H1E,HIST1H1C,HIST1H1C,HIST1H2AC,HIST1H1T,HFE          | HIST1H2AC      | 425                        |
| LTA-DBP | rs2415251  | 15q24 | 73029208  | t           | c       | 0.3255  | 0.0548 | 1.22E-08 | +++++*    | NA                                                                    | COX5A,SCAMP5,MP1,RPP25,C15orf17                                                | RPP25          | 5287                       |
| LTA-DBP | rs12507136 | 1p36  | 11806318  | t           | c       | -0.4716 | 0.0715 | 2.49E-10 | -----     | CLCN6                                                                 | MTHFR,NPPA,CLCN6,NPPB                                                          | CLCN6          | 4544                       |
| LTA-DBP | rs2681472  | 12q21 | 88533090  | a           | g       | 0.5231  | 0.0691 | 4.01E-13 | +++++*    | ATP2B1                                                                | ATP2B1                                                                         | ATP2B1         | 27132                      |
| LTA-DBP | rs17037425 | 1p36  | 11782970  | a           | g       | -0.4967 | 0.0753 | 2.49E-10 | -----     | CLCN6                                                                 | MTHFR,NPPA,CLCN6,NPPB,AGTRAP                                                   | CLCN6          | 4177                       |
| LTA-DBP | rs11072514 | 15q24 | 73008918  | a           | t       | -0.3224 | 0.0526 | 4.26E-09 | -----     | COX5A                                                                 | COX5A,MP1,SCAMP2,RPP25,C15orf17                                                | COX5A          | 8507                       |
| LTA-DBP | rs3184504  | 12q24 | 110368991 | t           | c       | 0.3936  | 0.0524 | 6.06E-13 | +++++*    | SH2B3                                                                 | SH2B3,ATXN2                                                                    | SH2B3          | 4818                       |
| LTA-DBP | rs11105388 | 12q21 | 88595872  | c           | g       | -0.5267 | 0.0704 | 7.25E-13 | -----     | NA                                                                    | ATP2B1                                                                         | ATP2B1         | 24597                      |
| LTA-DBP | rs189851   | 6p22  | 26212611  | t           | g       | 0.4493  | 0.0777 | 2.97E-08 | +++++*    | NA                                                                    | HIST1H2BD,HIST1H2BC,HIST1H1E,HIST1H1C,HIST1H1C,HIST1H2AC,HIST1H1T,HFE,HIST1H3C | HIST1H4C       | 68                         |
| LTA-DBP | rs11105378 | 12q21 | 88614872  | t           | c       | -0.5253 | 0.0716 | 2.03E-12 | -----     | NA                                                                    | ATP2B1                                                                         | ATP2B1         | 40897                      |
| LTA-DBP | rs189823   | 6p22  | 26230912  | t           | g       | -0.3346 | 0.0553 | 6.57E-09 | -----     | NA                                                                    | HIST1H2BD,HIST1H2BC,HIST1H1E,HIST1H1C,HIST1H2AC,HIST1H1T,HFE                   | HIST1H2BC      | 761                        |
| LTA-DBP | rs11105328 | 12q21 | 88466521  | a           | g       | 0.4968  | 0.0727 | 5.59E-11 | +++++*    | NA                                                                    | ATP2B1,WDR51B,GALNT4                                                           | WDR51B         | 22613                      |
| LTA-DBP | rs11105379 | 12q21 | 88619304  | a           | c       | 0.4551  | 0.0774 | 1.71E-08 | +++++*    | NA                                                                    | ATP2B1                                                                         | ATP2B1         | 45329                      |
| LTA-DBP | rs11105368 | 12q21 | 88566273  | c           | g       | -0.3434 | 0.0532 | 5.82E-10 | -----     | ATP2B1                                                                | ATP2B1                                                                         | ATP2B1         | 7702                       |
| LTA-DBP | rs17037390 | 1p36  | 11783430  | a           | g       | -0.4687 | 0.0717 | 3.70E-10 | -----     | MTHFR                                                                 | MTHFR,NPPA,CLCN6,NPPB,AGTRAP                                                   | MTHFR          | 5272                       |
| LTA-DBP | rs17630235 | 12q24 | 111076069 | a           | g       | 0.3354  | 0.0539 | 2.43E-09 | +++++*    | NA                                                                    | TRAFD1,C12orf30                                                                | TRAFD1         | 274                        |
| LTA-DBP | rs1378938  | 15q24 | 72883496  | t           | c       | 0.3371  | 0.0588 | 3.90E-08 | +++++*    | NA                                                                    | CPLX3,CYP1A2,SCAMP2,CSK,ULK3,LMAN1L                                            | CSK            | 939                        |
| LTA-MAP | rs1275986  | 2p23  | 26765583  | a           | c       | -0.3875 | 0.0616 | 1.80E-09 | -----     | NA                                                                    | KCNK3,CIB4                                                                     | KCNK3          | 3539                       |
| LTA-MAP | rs10858914 | 12q21 | 88555526  | t           | c       | 0.3913  | 0.061  | 8.48E-10 | +++++*    | ATP2B1                                                                | ATP2B1                                                                         | ATP2B1         | 18449                      |
| LTA-MAP | rs8026747  | 20q13 | 57179019  | a           | g       | 0.5438  | 0.094  | 3.20E-08 | +++++*    | NA                                                                    | C20orf174                                                                      | C20orf174      | 20450                      |
| LTA-MAP | rs11072512 | 15q24 | 72991079  | t           | c       | -0.3902 | 0.0605 | 7.19E-10 | -----     | NA                                                                    | COX5A,SCAMP2,RPP25,C15orf17,MP1                                                | C15orf17       | 4564                       |
| LTA-MAP | rs7495739  | 15q24 | 72972723  | a           | g       | 0.3859  | 0.0605 | 1.05E-09 | +++++*    | MP1                                                                   | COX5A,SCAMP2,C15orf17,MP1,ULK3                                                 | MP1            | 3261                       |
| LTA-MAP | rs7537765  | 1p36  | 11809890  | a           | g       | 0.6026  | 0.0822 | 2.49E-12 | +++++*    | CLCN6                                                                 | MTHFR,NPPA,CLCN6,NPPB                                                          | CLCN6          | 972                        |
| LTA-MAP | rs1275979  | 2p23  | 26777072  | t           | c       | 0.385   | 0.0617 | 2.52E-09 | +++++*    | KCNK3                                                                 | KCNK3,CIB4                                                                     | KCNK3          | 7950                       |
| LTA-MAP | rs10858911 | 12q21 | 88487272  | a           | g       | -0.3729 | 0.0603 | 3.32E-09 | -----     | NA                                                                    | ATP2B1,WDR51B,GALNT4                                                           | ATP2B1         | 18686                      |
| LTA-MAP | rs7085     | 15q24 | 72882536  | t           | g       | 0.4311  | 0.0672 | 8.48E-10 | +++++*    | CSK                                                                   | CYP1A2,CSK,LMAN1L,CPLX3,SCAMP2,ULK3                                            | CSK            | 21                         |
| LTA-MAP | rs11905512 | 20q13 | 57187391  | c           | g       | -0.5575 | 0.0944 | 1.66E-08 | -----     | NA                                                                    | C20orf174                                                                      | C20orf174      | 12078                      |
| LTA-MAP | rs5068     | 1p36  | 11828581  | a           | g       | 0.8103  | 0.1348 | 9.06E-09 | +++++*    | NPPA                                                                  | MTHFR,NPPA,CLCN6,NPPB                                                          | NPPA           | 199                        |
| LTA-MAP | rs8495127  | 15q24 | 72981543  | t           | c       | -0.398  | 0.0658 | 7.53E-09 | -----     | C15orf17                                                              | COX5A,MP1,SCAMP2,RPP25,C15orf17,ULK3                                           | C15orf17       | 2163                       |
| LTA-MAP | rs11105354 | 12q21 | 88506854  | a           | g       | 0.685   | 0.0801 | 2.98E-16 | +++++*    | ATP2B1                                                                | ATP2B1                                                                         | ATP2B1         | 23321                      |
| LTA-MAP | rs12246717 | 10q21 | 63129189  | t           | g       | 0.4361  | 0.072  | 7.13E-09 | +++++*    | C10orf107                                                             | C10orf107                                                                      | C10orf107      | 36485                      |
| LTA-MAP | rs10774625 | 12q24 | 110394602 | a           | g       | 0.443   | 0.0609 | 3.66E-12 | +++++*    | ATXN2                                                                 | SH2B3,ATXN2                                                                    | ATXN2          | 20201                      |
| LTA-MAP | rs82384    | 20q13 | 57132908  | t           | c       | 0.5221  | 0.0854 | 5.03E-09 | +++++*    | NA                                                                    | NA                                                                             | C20orf174      | 66661                      |
| LTA-MAP | rs6092743  | 20q13 | 57133705  | a           | g       | 0.6372  | 0.0871 | 3.66E-10 | +++++*    | NA                                                                    | NA                                                                             | C20orf174      | 65704                      |
| LTA-MAP | rs1834474  | 15q24 | 7293237   | c           | g       | 0.4059  | 0.0685 | 1.05E-08 | +++++*    | LMAN1L                                                                | CSK,LMAN1L,CPLX3,SCAMP2,ULK3                                                   | LMAN           |                            |



| Trait   | SNPID      | Chr   | Position  | Bui Allele1 | Allele2 | Beta    | s.e.   | P        | Direction | InRefGene | RefGenes 60kbfromSNP                        | ClosestRefGene | DistanceFromClosestRefGene |
|---------|------------|-------|-----------|-------------|---------|---------|--------|----------|-----------|-----------|---------------------------------------------|----------------|----------------------------|
| LTA-MAP | rs4942686  | 12q21 | 8046580   | t           | c       | 0.6575  | 0.0857 | 2.22E-13 | ++++++    | NA        | ATP2B1,WDR51B,GALNT4                        | WDR51B         | 21772                      |
| LTA-MAP | rs17367504 | 1p38  | 11785365  | a           | g       | 0.5888  | 0.0825 | 9.08E-12 | ++++      | MTHFR     | MTHFR,NPPA,CLCN6,NPPB,AGTRAP                | MTHFR          | 3337                       |
| LTA-MAP | rs11072511 | 15q24 | 72946486  | a           | g       | 0.3859  | 0.0605 | 1.09E-09 | ++++      | SCAMP2    | COX5A,MP1,LMAN1L,CPLX3,SCAMP2,C15orf17,ULK3 | SCAMP2         | 6237                       |
| LTA-MAP | rs17696736 | 12q24 | 110971201 | a           | g       | -0.3667 | 0.0617 | 1.32E-08 | -----     | C12orf30  | ERP29,TMEM116,C12orf30                      | C12orf30       | 22325                      |
| LTA-MAP | rs7136259  | 12q21 | 88605319  | t           | c       | -0.4383 | 0.0607 | 4.98E-12 | -----     | NA        | ATP2B1                                      | ATP2B1         | 31344                      |
| LTA-MAP | rs236713   | 20q13 | 57128972  | a           | g       | -0.4742 | 0.0791 | 9.92E-09 | -----     | NA        | NA                                          | C20orf174      | 70497                      |
| LTA-MAP | rs2681485  | 12q21 | 88549753  | a           | g       | 0.4601  | 0.0611 | 6.24E-13 | ++++      | ATP2B1    | ATP2B1                                      | 24222          |                            |
| LTA-MAP | rs2588918  | 10q21 | 63195030  | a           | t       | 0.4192  | 0.0711 | 1.76E-06 | ++++      | C10orf107 | C10orf107                                   | 1065           |                            |
| LTA-MAP | rs1275923  | 2p23  | 26786300  | t           | c       | -0.3935 | 0.0633 | 2.84E-09 | -----     | KCNK3     | KCNK3,C2orf18                               | KCNK3          | 17178                      |
| LTA-MAP | rs12487    | 15q24 | 72923747  | t           | c       | 0.3523  | 0.0609 | 3.24E-08 | ++++      | NA        | CPLX3,SCAMP2,C15orf17,MP1,CSK,ULK3,LMAN1L   | SCAMP2         | 502                        |
| LTA-MAP | rs2120702  | 10q21 | 63192884  | a           | t       | -0.4041 | 0.0683 | 1.55E-08 | -----     | C10orf107 | C10orf107                                   | 3431           |                            |
| LTA-MAP | rs12258967 | 10p12 | 18767965  | c           | g       | 0.452   | 0.0657 | 4.98E-11 | ++++      | CACNB2    | CACNB2                                      | 38447          |                            |
| LTA-MAP | rs16916504 | 10q21 | 63122962  | a           | g       | 0.4371  | 0.0721 | 6.92E-09 | ++++      | C10orf107 | C10orf107                                   | 30238          |                            |
| LTA-MAP | rs6495126  | 15q24 | 72962079  | a           | g       | 0.3953  | 0.0655 | 7.95E-09 | ++++      | NA        | COX5A,MP1,LMAN1L,CPLX3,SCAMP2,C15orf17,ULK3 | MP1            | 7383                       |
| LTA-MAP | rs6100343  | 20q13 | 57133007  | a           | g       | 0.5228  | 0.0854 | 4.92E-09 | ++++      | NA        | NA                                          | C20orf174      | 65862                      |
| LTA-MAP | rs2586886  | 2p23  | 26785335  | t           | c       | -0.3916 | 0.0628 | 2.56E-09 | -----     | KCNK3     | C2orf18,KCNK3                               | KCNK3          | 16413                      |
| LTA-MAP | rs236706   | 20q13 | 57124811  | t           | c       | -0.4863 | 0.0793 | 4.66E-09 | -----     | NA        | NA                                          | SLMO2          | 73515                      |
| LTA-MAP | rs12230074 | 12q21 | 88614988  | a           | g       | 0.6822  | 0.0825 | 2.82E-15 | ++++      | NA        | ATP2B1                                      | ATP2B1         | 41023                      |
| LTA-MAP | rs11066188 | 12q24 | 111095097 | a           | g       | 0.3828  | 0.062  | 3.60E-09 | ++++      | NA        | TRAFD1                                      | TRAFD1         | 19302                      |
| LTA-MAP | rs1378941  | 15q24 | 72867203  | a           | c       | -0.3867 | 0.0636 | 6.32E-09 | -----     | CSK       | CYP1A2,CSK,LMAN1L,CPLX3,SCAMP2,ULK3         | CSK            | 5436                       |
| LTA-MAP | rs11065987 | 12q24 | 110556807 | a           | g       | -0.4117 | 0.0828 | 3.18E-10 | -----     | NA        | BRAP,ATXN2,ACAD10                           | BRAP           | 9471                       |
| LTA-MAP | rs938226   | 15q24 | 72856335  | t           | c       | -0.4311 | 0.0678 | 1.08E-09 | -----     | NA        | CYP1A2,CYP1A1,CSK,LMAN1L,CPLX3,ULK3         | CSK            | 5432                       |
| LTA-MAP | rs890315   | 1p36  | 10719453  | t           | c       | -0.4597 | 0.067  | 5.49E-11 | -----     | CASZ1     | CASZ1                                       | 59841          |                            |
| LTA-MAP | rs2166122  | 10q21 | 63193080  | t           | c       | -0.4812 | 0.0766 | 1.88E-09 | -----     | C10orf107 | C10orf107                                   | 3015           |                            |
| LTA-MAP | rs236714   | 20q13 | 57129635  | a           | t       | 0.4894  | 0.0796 | 4.20E-09 | ++++      | NA        | NA                                          | C20orf174      | 69834                      |
| LTA-MAP | rs1898969  | 15q24 | 72934386  | a           | c       | 0.3911  | 0.0677 | 2.66E-08 | ++++      | SCAMP2    | MP1,CSK,LMAN1L,CPLX3,SCAMP2,C15orf17,ULK3   | SCAMP2         | 10136                      |
| LTA-MAP | rs16982520 | 20q13 | 57192115  | a           | g       | -0.5643 | 0.0945 | 1.16E-08 | -----     | NA        | C20orf174                                   | C20orf174      | 7354                       |
| LTA-MAP | rs653178   | 12q24 | 110492139 | t           | c       | -0.4433 | 0.0604 | 2.36E-12 | -----     | ATXN2     | ATXN2                                       | 29724          |                            |
| LTA-MAP | rs6015450  | 20q13 | 57184512  | a           | g       | -0.5552 | 0.0943 | 1.84E-08 | -----     | NA        | C20orf174                                   | C20orf174      | 14957                      |
| LTA-MAP | rs1378942  | 15q24 | 72864420  | a           | c       | -0.3853 | 0.0635 | 6.83E-09 | -----     | CSK       | CYP1A2,CYP1A1,CSK,LMAN1L,CPLX3,SCAMP2,ULK3  | CSK            | 2653                       |
| LTA-MAP | rs11068320 | 12q24 | 111390798 | a           | g       | 0.3536  | 0.061  | 3.06E-08 | ++++      | PTPN11    | RPL8,PTPN11                                 | PTPN11         | 41301                      |
| LTA-MAP | rs2675812  | 10q21 | 63193272  | t           | c       | -0.4126 | 0.0684 | 8.09E-09 | -----     | C10orf107 | C10orf107                                   | 2823           |                            |
| LTA-MAP | rs4842667  | 12q21 | 88490785  | a           | g       | 0.3688  | 0.0602 | 4.62E-09 | ++++      | NA        | ATP2B1,WDR51B,GALNT4                        | ATP2B1         | 15173                      |
| LTA-MAP | rs284277   | 1p36  | 10713384  | a           | c       | -0.4569 | 0.0692 | 2.73E-10 | -----     | CASZ1     | CASZ1                                       | 65910          |                            |
| LTA-MAP | rs3765066  | 15q24 | 72927907  | a           | g       | 0.4075  | 0.0649 | 1.99E-09 | ++++      | SCAMP2    | CPLX3,SCAMP2,C15orf17,MP1,CSK,ULK3,LMAN1L   | SCAMP2         | 3658                       |
| LTA-MAP | rs1275982  | 2p23  | 26772593  | t           | c       | -0.3813 | 0.0618 | 3.57E-09 | -----     | KCNK3     | KCNK3,CIB4                                  | KCNK3          | 3471                       |
| LTA-MAP | rs6100342  | 20q13 | 57132656  | a           | g       | -0.5215 | 0.0853 | 5.14E-09 | -----     | NA        | NA                                          | C20orf174      | 66813                      |
| LTA-MAP | rs260014   | 20q13 | 57192854  | t           | c       | -0.5518 | 0.0904 | 5.36E-09 | -----     | NA        | C20orf174                                   | C20orf174      | 6615                       |
| LTA-MAP | rs11072518 | 15q24 | 73021663  | t           | c       | 0.4315  | 0.0636 | 8.95E-11 | ++++      | NA        | COX5A,SCAMP5,RPP25,C15orf17,MP1             | COX5A          | 4238                       |
| LTA-MAP | rs80031937 | 15q24 | 72968174  | a           | g       | 0.397   | 0.0657 | 7.57E-09 | ++++      | NA        | COX5A,MP1,CPLX3,SCAMP2,C15orf17,ULK3        | MP1            | 1288                       |
| LTA-MAP | rs1401982  | 12q21 | 88513730  | a           | g       | 0.4579  | 0.0609 | 6.90E-13 | ++++      | ATP2B1    | ATP2B1                                      | 7772           |                            |
| LTA-MAP | rs11630918 | 15q24 | 72942949  | t           | c       | -0.3901 | 0.062  | 1.77E-09 | -----     | SCAMP2    | COX5A,MP1,LMAN1L,CPLX3,SCAMP2,C15orf17,ULK3 | SCAMP2         | 9774                       |
| LTA-MAP | rs998991   | 20q13 | 57133036  | t           | c       | 0.5224  | 0.0854 | 5.00E-09 | ++++      | NA        | NA                                          | C20orf174      | 66433                      |
| LTA-MAP | rs2070759  | 12q21 | 88511907  | t           | g       | 0.3991  | 0.0608 | 9.54E-10 | ++++      | ATP2B1    | ATP2B1                                      | 32108          |                            |
| LTA-MAP | rs12442901 | 15q24 | 72870865  | a           | g       | 0.428   | 0.0673 | 1.23E-09 | ++++      | CSK       | CPLX3,CYP1A2,SCAMP2,CSK,ULK3,LMAN1L         | CSK            | 8158                       |
| LTA-MAP | rs13306561 | 1p36  | 11788391  | a           | g       | 0.6133  | 0.0832 | 1.83E-12 | ++++      | MTHFR     | MTHFR,NPPA,CLCN6,NPPB,AGTRAP                | MTHFR          | 311                        |
| LTA-MAP | rs11072513 | 15q24 | 73008021  | t           | c       | -0.3959 | 0.0606 | 4.27E-10 | -----     | COX5A     | COX5A,MP1,SCAMP2,RPP25,C15orf17             | COX5A          | 8350                       |
| LTA-MAP | rs2681492  | 12q21 | 88537220  | t           | c       | 0.6564  | 0.0779 | 8.01E-16 | ++++      | ATP2B1    | ATP2B1                                      | 31262          |                            |
| LTA-MAP | rs21689519 | 15q24 | 72867925  | t           | c       | 0.4287  | 0.0673 | 1.13E-09 | ++++      | CSK       | CYP1A2,CSK,LMAN1L,CPLX3,SCAMP2,ULK3         | CSK            | 6158                       |
| LTA-MAP | rs1275977  | 2p23  | 26776359  | a           | g       | -0.3812 | 0.0684 | 4.04E-08 | -----     | KCNK3     | KCNK3,CIB4                                  | KCNK3          | 7237                       |
| LTA-MAP | rs2393833  | 10q21 | 63115322  | t           | c       | -0.4359 | 0.072  | 7.35E-09 | -----     | C10orf107 | C10orf107                                   | 22598          |                            |
| LTA-MAP | rs2004776  | 1q42  | 228915325 | t           | c       | 0.4226  | 0.0708 | 1.18E-08 | ++++      | AGT       | AGT,COG2,CAPN9                              | AGT            | 1239                       |
| LTA-MAP | rs4889633  | 15q24 | 72965260  | a           | g       | -0.398  | 0.0656 | 6.81E-09 | -----     | NA        | COX5A,CPLX3,SCAMP2,C15orf17,MP1,ULK3        | MP1            | 4202                       |
| LTA-MAP | rs236715   | 20q13 | 57130490  | t           | c       | -0.4819 | 0.0794 | 6.55E-09 | -----     | NA        | NA                                          | C20orf174      | 68979                      |
| LTA-MAP | rs1543827  | 15q24 | 72850626  | t           | c       | 0.4104  | 0.0675 | 6.29E-09 | ++++      | NA        | CPLX3,CYP1A2,CYP1A1,CSK,LMAN1L              | CSK            | 11141                      |
| LTA-MAP | rs492945   | 1p36  | 10723185  | a           | g       | -0.4088 | 0.0674 | 6.62E-09 | -----     | CASZ1     | CASZ1                                       | 56109          |                            |
| LTA-MAP | rs11856413 | 15q24 | 72968945  | a           | g       | 0.3881  | 0.0605 | 8.58E-10 | ++++      | NA        | COX5A,SCAMP2,RPP25,C15orf17,MP1             | C15orf17       | 430                        |
| LTA-MAP | rs1133322  | 15q24 | 72999410  | a           | g       | 0.393   | 0.0606 | 5.61E-10 | ++++      | NA        | COX5A,MP1,SCAMP2,RPP25,C15orf17             | COX5A          | 261                        |
| LTA-MAP | rs11105364 | 12q21 | 88593407  | t           | g       | 0.6848  | 0.0809 | 6.17E-16 | ++++      | NA        | ATP2B1                                      | ATP2B1         | 19432                      |
| LTA-MAP | rs8495122  | 15q24 | 72912698  | a           | g       | 0.3642  | 0.0611 | 1.23E-08 | ++++      | NA        | CPLX3,SCAMP2,MP1,CSK,ULK3,LMAN1L            | CPLX3          | 1509                       |
| LTA-MAP | rs12579302 | 12q21 | 88574634  | a           | g       | 0.6809  | 0.0808 | 7.72E-16 | ++++      | NA        | ATP2B1                                      | ATP2B1         | 659                        |
| LTA-MAP | rs35441    | 12q24 | 114037498 | t           | c       | -0.3631 | 0.0629 | 3.41E-08 | -----     | NA        | NA                                          | TBX3           | 431146                     |
| LTA-MAP | rs17376328 | 1p36  | 11799249  | a           | g       | -0.7767 | 0.1318 | 1.79E-08 | -----     | CLCN6     | MTHFR,NPPA,CLCN6,NPPB                       | CLCN6          | 10456                      |
| LTA-MAP | rs12244842 | 10q21 | 63109192  | a           | g       | -0.4425 | 0.0723 | 4.97E-09 | -----     | C10orf107 | C10orf107                                   | 16488          |                            |
| LTA-MAP | rs4766578  | 12q24 | 110388754 | a           | t       | -0.4436 | 0.0609 | 3.45E-12 | -----     | ATXN2     | SH2B3,ATXN2                                 | ATXN2          | 14353                      |
| LTA-MAP | rs11105383 | 12q21 | 88631437  | t           | c       | 0.5824  | 0.0895 | 4.96E-10 | ++++      | NA        | ATP2B1                                      | ATP2B1         | 57462                      |
| LTA-MAP | rs1992625  | 10q21 | 63190704  | t           | c       | -0.478  | 0.0764 | 2.26E-09 | -----     | C10orf107 | C10orf107                                   | 5391           |                            |
| LTA-MAP | rs4548524  | 10p12 | 18756873  | a           | g       | 0.3652  | 0.0631 | 3.10E-08 | ++++      | CACNB2    | CACNB2                                      | 27355          |                            |
| LTA-MAP | rs1275988  | 2p23  | 26767988  | t           | c       | -0.3894 | 0.0616 | 1.51E-09 | -----     | NA        | KCNK3,CIB4                                  | KCNK3          | 1254                       |
| LTA-MAP | rs1133323  | 15q24 | 72999278  | t           | c       | -0.3986 | 0.0606 | 3.22E-10 | -----     | NA        | COX5A,MP1,SCAMP2,RPP25,C15orf17             | COX5A          | 393                        |
| LTA-MAP | rs1378940  | 15q24 | 72870547  | a           | c       | -0.3902 | 0.0639 | 5.28E-09 | -----     | CSK       | CPLX3,CYP1A2,SCAMP2,CSK,ULK3,LMAN1L         | CSK            | 8780                       |
| LTA-MAP | rs2301249  | 15q24 | 72879437  | t           | c       | 0.4315  | 0.0671 | 7.74E-10 | ++++      | CSK       | CPLX3,CYP1A2,SCAMP2,CSK,ULK3,LMAN1L         | CSK            | 3120                       |
| LTA-MAP | rs1127796  | 15q24 | 72890057  | t           | c       | 0.3864  | 0.0605 | 1.02E-09 | ++++      | C15orf17  | COX5A,SCAMP2,RPP25,C15orf17,MP1,ULK3        | C15orf17       | 677                        |
| LTA-MAP | rs4886406  | 15q24 | 72844256  | t           | g       | -0.3944 | 0.0676 | 2.50E-08 | -----     | NA        | CYP1A2,CYP1A1,CSK,LMAN1L                    | CYP1A2         | 8262                       |
| LTA-MAP | rs6026704  | 20q13 | 57117540  | c           | g       | 0.5037  | 0.0847 | 1.32E-08 | ++++      | NA        | NA                                          | SLMO2          | 66244                      |
| LTA-MAP | rs7497393  | 15q24 | 72962510  | c           | g       | -0.3872 | 0.0604 | 9.16E-10 | -----     | NA        | COX5A,MP1,LMAN1L,CPLX3,SCAMP2,C15orf17,ULK3 | MP1            | 6852                       |
| LTA-MAP | rs7299436  | 12q21 | 88637201  | t           | g       | 0.5845  | 0.0898 | 5.02E-10 | ++++      | NA        | NA                                          | ATP2B1         | 63226                      |
| LTA-MAP | rs7162232  | 15q24 | 72902948  | a           | g       | -0.4102 | 0.0685 | 1.02E-08 | -----     | LMAN1L    | CPLX3,SCAMP2,CSK,ULK3,LMAN1L                | LMAN1L         | 2203                       |
| LTA-MAP | rs6100340  | 20q13 | 57118007  | a           | g       | -0.5197 | 0.0848 | 4.63E-09 | -----     | NA        | NA                                          | SLMO2          | 66711                      |

| Trait   | SNPID       | Chr   | Position  | Bui Allele1 | Allele2 | Beta    | s.e.   | P        | Direction | InRefGene | RefGenes 60kbfromSNP                      | ClosestRefGene | DistanceFromClosestRefGene |
|---------|-------------|-------|-----------|-------------|---------|---------|--------|----------|-----------|-----------|-------------------------------------------|----------------|----------------------------|
| LTA-MAP | rs8033381   | 15q24 | 72867738  | a           | g       | -0.4293 | 0.0673 | 1.07E-09 | -----     | CSK       | CPLX3,CYP1A2,SCAMP2,CSK,ULK3,LMAN1L       | CSK            | 5971                       |
| LTA-MAP | rs260013    | 20q13 | 51914118  | a           | g       | -0.5496 | 0.0905 | 6.48E-09 | -----     | NA        | C20orf174                                 | C20orf174      | 5351                       |
| LTA-MAP | rs12048278  | 1p36  | 10722184  | t           | c       | -0.4722 | 0.0693 | 7.28E-11 | -----?    | CASZ1     | CASZ1                                     | CASZ1          | 57130                      |
| LTA-MAP | rs3750727   | 10q21 | 63114411  | a           | g       | 0.4423  | 0.0723 | 5.01E-09 | +++++     | C10orf107 | C10orf107                                 | C10orf107      | 21887                      |
| LTA-MAP | rs7362597   | 20q13 | 57112829  | a           | g       | 0.5054  | 0.0848 | 1.22E-08 | +++++     | NA        | NA                                        | SLMO2          | 61533                      |
| LTA-MAP | rs7070797   | 10q21 | 63221779  | a           | g       | -0.5456 | 0.0878 | 2.89E-09 | -----     | NA        | C10orf107                                 | C10orf107      | 25684                      |
| LTA-MAP | rs236705    | 20q13 | 57122065  | t           | c       | -0.487  | 0.0793 | 4.46E-09 | -----     | NA        | NA                                        | SLMO2          | 70769                      |
| LTA-MAP | rs973237    | 10q21 | 63195307  | a           | g       | 0.42    | 0.0718 | 2.26E-08 | +++++     | C10orf107 | C10orf107                                 | C10orf107      | 788                        |
| LTA-MAP | rs4886629   | 15q24 | 72859611  | c           | g       | -0.4308 | 0.0675 | 1.09E-09 | +++++     | NA        | CPLX3,CYP1A2,CYP1A1,CSK,ULK3,LMAN1L       | CSK            | 2156                       |
| LTA-MAP | rs11854147  | 15q24 | 72839624  | t           | c       | 0.401   | 0.0671 | 1.09E-08 | +++++     | NA        | CYP1A2,CYP1A1,CSK,LMAN1L                  | CYP1A2         | 3830                       |
| LTA-MAP | rs4845953   | 1p36  | 10724576  | a           | g       | -0.3955 | 0.0667 | 1.43E-08 | -----?    | CASZ1     | CASZ1                                     | CASZ1          | 54718                      |
| LTA-MAP | rs17249754  | 12q21 | 88584717  | a           | g       | -0.8855 | 0.0808 | 5.07E-16 | -----     | NA        | ATP2B1                                    | ATP2B1         | 10742                      |
| LTA-MAP | rs2408046   | 12q21 | 88633488  | t           | c       | -0.5057 | 0.0831 | 6.09E-09 | -----     | NA        | ATP2B1                                    | ATP2B1         | 59493                      |
| LTA-MAP | rs7176022   | 15q24 | 72894933  | a           | c       | 0.4115  | 0.0681 | 7.54E-09 | +++++     | LMAN1L    | CYP1A2,CSK,LMAN1L,CPLX3,SCAMP2,ULK3       | LMAN1L         | 2687                       |
| LTA-MAP | rs1465537   | 20q13 | 57131415  | t           | c       | 0.5218  | 0.0853 | 4.98E-09 | +++++     | NA        | NA                                        | C20orf174      | 69054                      |
| LTA-MAP | rs11105382  | 12q21 | 88631403  | t           | c       | 0.5818  | 0.0893 | 4.75E-10 | +++++     | NA        | ATP2B1                                    | ATP2B1         | 57428                      |
| LTA-MAP | rs1275985   | 7p23  | 26765249  | t           | c       | -0.3857 | 0.0618 | 2.39E-09 | -----     | NA        | KCNK3,CIB4                                | KCNK3          | 3873                       |
| LTA-MAP | rs4886410   | 15q24 | 72852697  | c           | g       | -0.3871 | 0.064  | 7.21E-09 | -----     | NA        | CYP1A2,CYP1A1,CSK,LMAN1L,CPLX3            | CSK            | 9070                       |
| LTA-MAP | rs6026748   | 20q13 | 57179210  | a           | g       | 0.5518  | 0.0941 | 2.06E-08 | +++++     | NA        | C20orf174                                 | C20orf174      | 20259                      |
| LTA-MAP | rs936230    | 15q24 | 72932151  | t           | c       | 0.3943  | 0.0677 | 2.53E-08 | +++++     | SCAMP2    | MPI,CSK,LMAN1L,CPLX3,SCAMP2,C15orf17,ULK3 | SCAMP2         | 7902                       |
| LTA-MAP | rs110689301 | 12q24 | 11355755  | a           | g       | -0.3558 | 0.0812 | 2.79E-08 | -----     | PTPN11    | RPL8,PTPN11                               | PTPN11         | 14837                      |
| LTA-MAP | rs2588992   | 10q21 | 63184677  | t           | c       | -0.4589 | 0.0762 | 8.55E-09 | -----     | C10orf107 | C10orf107                                 | C10orf107      | 11418                      |
| LTA-MAP | rs35432     | 12q24 | 114039913 | t           | c       | -0.3676 | 0.0637 | 3.43E-08 | -----     | NA        | NA                                        | TBX3           | 433561                     |
| LTA-MAP | rs2113894   | 12q21 | 88623528  | a           | t       | 0.5072  | 0.0827 | 4.64E-09 | +++++     | NA        | ATP2B1                                    | ATP2B1         | 49553                      |
| LTA-MAP | rs9210      | 15q24 | 72915554  | a           | g       | 0.3887  | 0.0675 | 3.73E-08 | +++++     | ULK3      | MPI,CSK,LMAN1L,CPLX3,SCAMP2,ULK3          | ULK3           | 43                         |
| LTA-MAP | rs1130741   | 15q24 | 72976983  | a           | g       | 0.3868  | 0.0606 | 1.07E-09 | +++++     | MPI       | COX5A,SCAMP2,RPP25,C15orf17,MPI,ULK3      | MPI            | 636                        |
| LTA-MAP | rs10859915  | 12q21 | 88575678  | a           | g       | 0.3548  | 0.0609 | 2.58E-08 | +++++     | NA        | ATP2B1                                    | ATP2B1         | 1703                       |
| LTA-MAP | rs2050265   | 1p36  | 11802286  | a           | g       | 0.602   | 0.0823 | 2.77E-12 | +++++     | CLCN6     | MTHFR,NPPA,CLCN6,NPPB                     | CLCN6          | 8576                       |
| LTA-MAP | rs11014166  | 10p12 | 18748804  | a           | t       | 0.3878  | 0.0633 | 4.77E-09 | +++++     | CACNB2    | CACNB2                                    | CACNB2         | 19286                      |
| LTA-MAP | rs12243859  | 10p12 | 18780638  | t           | c       | -0.3739 | 0.0639 | 2.23E-08 | +++++     | CACNB2    | CACNB2                                    | CACNB2         | 51120                      |
| LTA-MAP | rs4590817   | 10q21 | 63137559  | c           | g       | -0.4862 | 0.0816 | 4.72E-08 | -----     | C10orf107 | C10orf107                                 | C10orf107      | 44835                      |
| LTA-MAP | rs183173    | 20q13 | 57159500  | t           | g       | -0.5073 | 0.0888 | 4.81E-08 | -----     | NA        | C20orf174                                 | C20orf174      | 39989                      |
| LTA-MAP | rs8042694   | 15q24 | 73012468  | a           | g       | -0.4071 | 0.066  | 3.65E-09 | -----     | COX5A     | COX5A,MPI,SCAMP2,RPP25,C15orf17           | COX5A          | 4957                       |
| LTA-MAP | rs1275980   | 2p23  | 26770473  | t           | c       | -0.3863 | 0.0617 | 2.21E-09 | -----     | KCNK3     | KCNK3,CIB4                                | KCNK3          | 1351                       |
| LTA-MAP | rs1813353   | 10p12 | 18747454  | t           | c       | 0.439   | 0.0652 | 1.26E-10 | +++++     | CACNB2    | CACNB2                                    | CACNB2         | 17936                      |
| LTA-MAP | rs6676300   | 1p36  | 11847887  | a           | g       | 0.3641  | 0.0634 | 4.03E-08 | +++++     | NA        | MTHFR,KAA2013,NPPA,CLCN6,NPPB             | NPPB           | 6308                       |
| LTA-MAP | rs2415251   | 15q24 | 73029208  | t           | c       | 0.3962  | 0.0631 | 1.99E-09 | +++++     | NA        | COX5A,SCAMP5,MPI,RPP25,C15orf17           | RPP25          | 5287                       |
| LTA-MAP | rs12567136  | 1p36  | 11806318  | t           | c       | -0.6025 | 0.0823 | 2.64E-12 | +++++     | CLCN6     | MTHFR,NPPA,CLCN6,NPPB                     | CLCN6          | 4544                       |
| LTA-MAP | rs2681472   | 12q21 | 88533090  | a           | g       | 0.6861  | 0.0796 | 1.77E-16 | +++++     | ATP2B1    | ATP2B1                                    | ATP2B1         | 27132                      |
| LTA-MAP | rs17037425  | 1p36  | 11792970  | a           | g       | -0.6215 | 0.0888 | 7.76E-12 | -----     | CLCN6     | MTHFR,NPPA,CLCN6,NPPB,AGTRAP              | CLCN6          | 4177                       |
| LTA-MAP | rs11072514  | 15q24 | 73008918  | a           | t       | -0.396  | 0.0606 | 4.34E-10 | -----     | COX5A     | COX5A,MPI,SCAMP2,RPP25,C15orf17           | COX5A          | 8507                       |
| LTA-MAP | rs3184504   | 12q24 | 110388991 | t           | c       | 0.4489  | 0.0605 | 1.08E-12 | +++++     | SH2B3     | SH2B3,ATXN2                               | SH2B3          | 4418                       |
| LTA-MAP | rs11105368  | 12q21 | 88598572  | c           | g       | -0.5845 | 0.081  | 6.01E-10 | -----     | NA        | ATP2B1                                    | ATP2B1         | 24597                      |
| LTA-MAP | rs4845943   | 1p36  | 10724172  | a           | g       | 0.6025  | 0.1056 | 4.97E-08 | +++++     | CASZ1     | CASZ1                                     | CASZ1          | 55122                      |
| LTA-MAP | rs11105378  | 12q21 | 88614872  | t           | c       | -0.6822 | 0.0824 | 2.46E-15 | -----     | NA        | ATP2B1                                    | ATP2B1         | 40887                      |
| LTA-MAP | rs11105328  | 12q21 | 88466521  | a           | c       | 0.6393  | 0.0837 | 2.84E-13 | +++++     | NA        | ATP2B1,WDR51B,GALNT4                      | WDR51B         | 22613                      |
| LTA-MAP | rs11105379  | 12q21 | 88619304  | t           | c       | 0.5969  | 0.0892 | 3.22E-10 | +++++     | NA        | ATP2B1                                    | ATP2B1         | 45329                      |
| LTA-MAP | rs11105358  | 12q21 | 88566273  | c           | g       | -0.4644 | 0.0613 | 4.39E-13 | -----     | ATP2B1    | ATP2B1                                    | ATP2B1         | 7702                       |
| LTA-MAP | rs7922049   | 10q21 | 63132371  | a           | g       | -0.4993 | 0.085  | 2.00E-08 | -----     | C10orf107 | C10orf107                                 | C10orf107      | 39847                      |
| LTA-MAP | rs17037390  | 1p36  | 11783430  | a           | g       | -0.8015 | 0.0828 | 3.37E-12 | -----     | MTHFR     | MTHFR,NPPA,CLCN6,NPPB,AGTRAP              | MTHFR          | 5272                       |
| LTA-MAP | rs236710    | 20q13 | 57127024  | t           | g       | -0.4852 | 0.0793 | 5.04E-09 | -----     | NA        | NA                                        | C20orf174      | 72445                      |
| LTA-MAP | rs17630235  | 12q24 | 111078069 | a           | g       | 0.3848  | 0.062  | 2.94E-09 | +++++     | NA        | TRAFD1,C12orf30                           | TRAFD1         | 274                        |
| LTA-MAP | rs1378938   | 15q24 | 72883496  | t           | c       | 0.4148  | 0.0679 | 5.32E-09 | +++++     | NA        | CPLX3,CYP1A2,SCAMP2,CSK,ULK3,LMAN1L       | CSK            | 939                        |
| LTA-MAP | rs11014171  | 10p12 | 18751201  | t           | c       | -0.3892 | 0.0632 | 3.88E-09 | -----     | CACNB2    | CACNB2                                    | CACNB2         | 21883                      |
| LTA-PP  | rs1717014   | 3p22  | 41882399  | t           | c       | -0.4739 | 0.0825 | 2.22E-08 | -----     | ULK4      | ULK4                                      | ULK4           | 86265                      |
| LTA-PP  | rs9854833   | 3p22  | 41750581  | t           | c       | -0.4956 | 0.082  | 3.95E-09 | -----     | ULK4      | ULK4                                      | ULK4           | 228083                     |
| LTA-PP  | rs1717003   | 3p22  | 41912004  | t           | c       | 0.4803  | 0.0824 | 1.36E-08 | +++++     | ULK4      | ULK4                                      | ULK4           | 66660                      |
| LTA-PP  | rs1717034   | 3p22  | 41930917  | a           | g       | -0.483  | 0.0823 | 1.10E-08 | -----     | ULK4      | ULK4                                      | ULK4           | 47747                      |
| LTA-PP  | rs2469      | 8p21  | 43407301  | t           | c       | -0.3519 | 0.0623 | 3.88E-08 | -----     | NA        | TTBK1,ZNF318,CRIP3,SLC22A7                | ZNF318         | 4484                       |
| LTA-PP  | rs6796210   | 3p22  | 41828722  | t           | c       | 0.4891  | 0.082  | 2.58E-08 | +++++     | ULK4      | ULK4                                      | ULK4           | 151942                     |
| LTA-PP  | rs1717007   | 3p22  | 41917203  | t           | c       | -0.4817 | 0.0824 | 1.23E-08 | -----     | ULK4      | ULK4                                      | ULK4           | 61481                      |
| LTA-PP  | rs7634985   | 3p22  | 41994569  | t           | c       | 0.5174  | 0.0861 | 4.93E-09 | +++++     | NA        | ULK4                                      | ULK4           | 15905                      |
| LTA-PP  | rs1052501   | 3p22  | 41900402  | t           | c       | 0.4781  | 0.0823 | 1.55E-08 | +++++     | ULK4      | ULK4                                      | ULK4           | 78262                      |
| LTA-PP  | rs7622259   | 3p22  | 41866355  | a           | t       | 0.4706  | 0.0827 | 2.96E-08 | +++++     | ULK4      | ULK4                                      | ULK4           | 122309                     |
| LTA-PP  | rs2272007   | 3p22  | 41971140  | t           | c       | -0.4879 | 0.082  | 6.77E-09 | -----     | ULK4      | ULK4                                      | ULK4           | 7524                       |
| LTA-PP  | rs9874975   | 3p22  | 41739304  | a           | g       | -0.4943 | 0.0819 | 4.26E-09 | -----     | ULK4      | ULK4                                      | ULK4           | 239360                     |
| LTA-PP  | rs6783001   | 3p22  | 41837236  | a           | g       | -0.4746 | 0.0825 | 2.13E-08 | -----     | ULK4      | ULK4                                      | ULK4           | 141428                     |
| LTA-PP  | rs2242416   | 8p21  | 43381582  | a           | g       | 0.355   | 0.0623 | 2.92E-08 | +++++     | CRIP3     | CRIP3,SLC22A7,TTBK1,ZNF318                | SLC22A7        | 329                        |
| LTA-PP  | rs1716999   | 3p22  | 41905045  | c           | g       | -0.479  | 0.0823 | 1.47E-08 | -----     | ULK4      | ULK4                                      | ULK4           | 73819                      |
| LTA-PP  | rs7631057   | 3p22  | 41792955  | t           | c       | -0.4772 | 0.0822 | 1.58E-08 | -----     | ULK4      | ULK4                                      | ULK4           | 185709                     |
| LTA-PP  | rs9685780   | 3p22  | 41870806  | a           | g       | 0.4729  | 0.0826 | 2.49E-08 | +++++     | ULK4      | ULK4                                      | ULK4           | 107858                     |
| LTA-PP  | rs1716655   | 3p22  | 41893710  | a           | g       | -0.4739 | 0.0825 | 2.21E-08 | -----     | ULK4      | ULK4                                      | ULK4           | 84954                      |
| LTA-PP  | rs6802340   | 3p22  | 41869038  | t           | c       | 0.4709  | 0.0827 | 2.90E-08 | +++++     | ULK4      | ULK4                                      | ULK4           | 109626                     |
| LTA-PP  | rs1717027   | 3p22  | 41892924  | t           | c       | -0.488  | 0.082  | 6.80E-09 | -----     | ULK4      | ULK4                                      | ULK4           | 15749                      |
| LTA-PP  | rs6796078   | 3p22  | 41892924  | a           | t       | -0.5183 | 0.0861 | 4.32E-09 | -----     | NA        | ULK4                                      | ULK4           | 14160                      |
| LTA-PP  | rs6781326   | 3p22  | 41752032  | t           | c       | 0.4963  | 0.0817 | 3.28E-09 | +++++     | ULK4      | ULK4                                      | ULK4           | 22632                      |
| LTA-PP  | rs7632387   | 3p22  | 41828185  | t           | c       | -0.4687 | 0.0821 | 2.67E-08 | -----     | ULK4      | ULK4                                      | ULK4           | 150499                     |
| LTA-PP  | rs1624519   | 3p22  | 41959804  | a           | g       | 0.4938  | 0.0823 | 1.05E-08 | +++++     | ULK4      | ULK4                                      | ULK4           | 18880                      |
| LTA-PP  | rs809930    | 3p22  | 42040009  | a           | g       | 0.5028  | 0.0868 | 1.71E-08 | +++++     | NA        | NA                                        | ULK4           | 61345                      |



| Trait  | SNPID      | Chr  | Position  | Bui Allele1 | Allele2 | Beta    | s.e.   | P        | Direction | InRefGene | RefGenes 60kbfromSNP       | ClosestRefGene | DistanceFromClosestRefGene |
|--------|------------|------|-----------|-------------|---------|---------|--------|----------|-----------|-----------|----------------------------|----------------|----------------------------|
| LTA-PP | rs6776724  | 3p22 | 41816274  | a           | g       | 0.4692  | 0.0823 | 2.79E-08 | ++++++    | ULK4      | ULK4                       | ULK4           | 162390                     |
| LTA-PP | rs6791806  | 3p22 | 41864999  | t           | c       | -0.4709 | 0.0827 | 2.89E-08 | -----     | ULK4      | ULK4                       | ULK4           | 113685                     |
| LTA-PP | rs939561   | 3p22 | 42032105  | a           | g       | 0.4936  | 0.087  | 3.27E-08 | ++++++    | NA        | ULK4                       | ULK4           | 53441                      |
| LTA-PP | rs1717017  | 3p22 | 41890620  | a           | c       | 0.4737  | 0.0825 | 2.25E-08 | ++++++    | ULK4      | ULK4                       | ULK4           | 88044                      |
| LTA-PP | rs4615050  | 3p22 | 41917502  | a           | t       | 0.482   | 0.0824 | 1.20E-08 | ++++++    | ULK4      | ULK4                       | ULK4           | 61162                      |
| LTA-PP | rs3890604  | 3p22 | 41735629  | t           | c       | -0.4915 | 0.0819 | 5.06E-09 | -----     | ULK4      | ULK4                       | ULK4           | 243035                     |
| LTA-PP | rs9850310  | 3p22 | 41866102  | t           | c       | 0.4708  | 0.0827 | 2.92E-08 | ++++++    | ULK4      | ULK4                       | ULK4           | 112562                     |
| LTA-PP | rs12705390 | 7q22 | 10619013  | a           | g       | 0.5865  | 0.0759 | 5.40E-14 | ++++++    | NA        | NA                         | PK3CG          | 95146                      |
| LTA-PP | rs7646144  | 3p22 | 41828129  | a           | t       | -0.4686 | 0.0821 | 2.69E-08 | -----     | ULK4      | ULK4                       | ULK4           | 150535                     |
| LTA-PP | rs985088   | 3p22 | 41835486  | t           | g       | -0.4946 | 0.0847 | 1.29E-08 | -----     | ULK4      | ULK4                       | ULK4           | 143178                     |
| LTA-PP | rs1019689  | 3p22 | 41869444  | t           | c       | 0.4717  | 0.0826 | 2.72E-08 | ++++++    | ULK4      | ULK4                       | ULK4           | 109220                     |
| LTA-PP | rs1717006  | 3p22 | 41915452  | a           | c       | 0.4791  | 0.082  | 1.29E-08 | ++++++    | ULK4      | ULK4                       | ULK4           | 83212                      |
| LTA-PP | rs880315   | 1p36 | 10719453  | t           | c       | -0.421  | 0.0703 | 5.45E-09 | -----?    | CASZ1     | CASZ1                      | CASZ1          | 59841                      |
| LTA-PP | rs1716975  | 3p22 | 41935010  | t           | c       | -0.4837 | 0.0822 | 1.01E-08 | -----     | ULK4      | ULK4                       | ULK4           | 43654                      |
| LTA-PP | rs17396575 | 7q22 | 106196088 | a           | g       | 0.5732  | 0.075  | 1.02E-13 | ++++++    | NA        | NA                         | PK3CG          | 96471                      |
| LTA-PP | rs1717020  | 3p22 | 41956494  | a           | c       | 0.4829  | 0.082  | 9.73E-09 | ++++++    | ULK4      | ULK4                       | ULK4           | 22170                      |
| LTA-PP | rs7629767  | 3p22 | 42018513  | t           | g       | 0.4948  | 0.0867 | 2.75E-08 | ++++++    | NA        | ULK4                       | ULK4           | 58849                      |
| LTA-PP | rs284277   | 1p36 | 10711384  | a           | c       | -0.4142 | 0.073  | 3.27E-08 | -----?    | CASZ1     | CASZ1                      | CASZ1          | 65810                      |
| LTA-PP | rs17062109 | 3p22 | 41785368  | t           | c       | -0.4773 | 0.082  | 1.46E-08 | -----     | ULK4      | ULK4                       | ULK4           | 193296                     |
| LTA-PP | rs1716994  | 3p22 | 41940536  | a           | g       | 0.4835  | 0.0823 | 1.06E-08 | ++++++    | ULK4      | ULK4                       | ULK4           | 38128                      |
| LTA-PP | rs9886759  | 3p22 | 41733422  | t           | c       | 0.483   | 0.0821 | 9.91E-09 | ++++++    | ULK4      | ULK4                       | ULK4           | 245242                     |
| LTA-PP | rs1718653  | 3p22 | 41950602  | a           | c       | 0.4838  | 0.0823 | 1.04E-08 | ++++++    | ULK4      | ULK4                       | ULK4           | 28062                      |
| LTA-PP | rs2128834  | 3p22 | 41837649  | a           | g       | 0.4694  | 0.0822 | 2.68E-08 | ++++++    | ULK4      | ULK4                       | ULK4           | 141015                     |
| LTA-PP | rs6599168  | 3p22 | 41725327  | t           | c       | 0.5163  | 0.0865 | 6.11E-09 | ++++++    | ULK4      | ULK4                       | ULK4           | 253337                     |
| LTA-PP | rs1716694  | 3p22 | 41961403  | t           | g       | 0.4864  | 0.0823 | 8.67E-09 | ++++++    | ULK4      | ULK4                       | ULK4           | 17261                      |
| LTA-PP | rs1613233  | 3p22 | 41920148  | a           | g       | 0.4819  | 0.0824 | 1.22E-08 | -----     | ULK4      | ULK4                       | ULK4           | 68616                      |
| LTA-PP | rs9882329  | 3p22 | 41742158  | t           | c       | 0.4949  | 0.082  | 4.10E-09 | ++++++    | ULK4      | ULK4                       | ULK4           | 236506                     |
| LTA-PP | rs12705389 | 7q22 | 106192878 | t           | c       | 0.5759  | 0.0753 | 9.52E-14 | ++++++    | NA        | NA                         | PK3CG          | 100281                     |
| LTA-PP | rs11760498 | 7q22 | 106206208 | a           | g       | 0.4499  | 0.0803 | 4.89E-08 | ++++++    | NA        | NA                         | PK3CG          | 86951                      |
| LTA-PP | rs10212536 | 3p22 | 41802030  | a           | g       | 0.4749  | 0.0823 | 1.96E-08 | ++++++    | ULK4      | ULK4                       | ULK4           | 176834                     |
| LTA-PP | rs6789260  | 3p22 | 41751354  | c           | g       | -0.4961 | 0.0817 | 3.36E-09 | -----     | ULK4      | ULK4                       | ULK4           | 227310                     |
| LTA-PP | rs10865914 | 3p22 | 41894503  | t           | c       | 0.4741  | 0.0825 | 2.17E-08 | ++++++    | ULK4      | ULK4                       | ULK4           | 84181                      |
| LTA-PP | rs2949837  | 7p13 | 45960903  | a           | t       | 0.402   | 0.0706 | 2.94E-08 | ++++++    | NA        | IGFBP3                     | IGFBP3         | 33507                      |
| LTA-PP | rs9828398  | 3p22 | 41870897  | t           | c       | -0.4731 | 0.0826 | 2.43E-08 | -----     | ULK4      | ULK4                       | ULK4           | 107767                     |
| LTA-PP | rs1615243  | 3p22 | 41940238  | t           | c       | 0.4836  | 0.0823 | 1.05E-08 | ++++++    | ULK4      | ULK4                       | ULK4           | 38426                      |
| LTA-PP | rs12536419 | 7q22 | 106206532 | a           | c       | -0.4747 | 0.0839 | 3.60E-08 | -----     | NA        | NA                         | PK3CG          | 86627                      |
| LTA-PP | rs7372217  | 3p22 | 41965126  | a           | g       | 0.4881  | 0.082  | 6.74E-09 | ++++++    | ULK4      | ULK4                       | ULK4           | 13538                      |
| LTA-PP | rs1716685  | 3p22 | 41900305  | t           | c       | -0.4772 | 0.0819 | 1.43E-08 | -----     | ULK4      | ULK4                       | ULK4           | 78359                      |
| LTA-PP | rs9847006  | 3p22 | 41730363  | t           | c       | 0.4844  | 0.0823 | 1.00E-08 | ++++++    | ULK4      | ULK4                       | ULK4           | 246301                     |
| LTA-PP | rs13087502 | 3p22 | 41990114  | t           | c       | 0.5202  | 0.086  | 3.93E-09 | ++++++    | NA        | ULK4                       | ULK4           | 11450                      |
| LTA-PP | rs2125738  | 6p21 | 43435728  | a           | g       | 0.3569  | 0.0828 | 3.20E-08 | ++++++    | ZNF318    | CRIP3,SLC22A7,ZNF318       | ZNF318         | 9431                       |
| LTA-PP | rs2625967  | 3p22 | 41875955  | a           | c       | -0.4736 | 0.0826 | 2.39E-08 | -----     | ULK4      | ULK4                       | ULK4           | 102709                     |
| LTA-PP | rs1716983  | 3p22 | 41939132  | a           | g       | 0.4835  | 0.0823 | 1.05E-08 | ++++++    | ULK4      | ULK4                       | ULK4           | 39532                      |
| LTA-PP | rs1716992  | 3p22 | 41959790  | a           | g       | 0.494   | 0.0823 | 1.04E-08 | ++++++    | ULK4      | ULK4                       | ULK4           | 19874                      |
| LTA-PP | rs9856633  | 3p22 | 41888854  | a           | g       | -0.4836 | 0.0819 | 9.04E-09 | -----     | NA        | ULK4                       | ULK4           | 10190                      |
| LTA-PP | rs1574430  | 6p21 | 43377007  | a           | c       | 0.3555  | 0.0825 | 3.04E-08 | ++++++    | SLC22A7   | CRIP3,SLC22A7,TTBK1,ZNF318 | SLC22A7        | 3032                       |
| LTA-PP | rs939558   | 3p22 | 41951044  | a           | c       | 0.4839  | 0.0823 | 1.04E-08 | ++++++    | ULK4      | ULK4                       | ULK4           | 27620                      |
| LTA-PP | rs1747177  | 7q22 | 106199094 | t           | c       | -0.589  | 0.0763 | 5.61E-14 | -----     | NA        | NA                         | PK3CG          | 94055                      |
| LTA-PP | rs10948071 | 6p21 | 43388691  | t           | c       | -0.3946 | 0.0852 | 9.08E-09 | -----     | NA        | CRIP3,SLC22A7,TTBK1,ZNF318 | CRIP3          | 4183                       |
| LTA-PP | rs9823254  | 3p22 | 41889772  | c           | g       | -0.4718 | 0.0828 | 2.89E-08 | -----     | ULK4      | ULK4                       | ULK4           | 108892                     |
| LTA-PP | rs4973995  | 3p22 | 41906477  | t           | c       | -0.4796 | 0.0823 | 1.42E-08 | -----     | ULK4      | ULK4                       | ULK4           | 72187                      |
| LTA-PP | rs9825741  | 3p22 | 41736832  | a           | t       | 0.49    | 0.0817 | 5.25E-09 | ++++++    | ULK4      | ULK4                       | ULK4           | 241832                     |
| LTA-PP | rs9866092  | 3p22 | 41870971  | a           | c       | 0.4734  | 0.0826 | 2.38E-08 | ++++++    | ULK4      | ULK4                       | ULK4           | 107693                     |
| LTA-PP | rs6599176  | 3p22 | 41763496  | t           | g       | 0.4973  | 0.0818 | 3.23E-09 | ++++++    | ULK4      | ULK4                       | ULK4           | 215168                     |
| LTA-PP | rs9867627  | 3p22 | 41770845  | a           | c       | 0.4941  | 0.0821 | 4.63E-09 | ++++++    | ULK4      | ULK4                       | ULK4           | 207819                     |
| LTA-PP | rs9830469  | 3p22 | 41737539  | a           | g       | 0.4917  | 0.0819 | 4.96E-09 | ++++++    | ULK4      | ULK4                       | ULK4           | 241125                     |
| LTA-PP | rs9865127  | 3p22 | 41782452  | t           | c       | -0.4781 | 0.082  | 1.39E-08 | -----     | ULK4      | ULK4                       | ULK4           | 196212                     |
| LTA-PP | rs6803560  | 3p22 | 41799484  | a           | g       | 0.4768  | 0.0822 | 1.64E-08 | ++++++    | ULK4      | ULK4                       | ULK4           | 179180                     |
| LTA-PP | rs2841647  | 6p21 | 43377158  | a           | c       | -0.3538 | 0.0827 | 3.92E-08 | -----?    | SLC22A7   | CRIP3,SLC22A7,TTBK1,ZNF318 | SLC22A7        | 3183                       |
| LTA-PP | rs1716857  | 3p22 | 41893480  | t           | c       | 0.4737  | 0.0825 | 2.24E-08 | ++++++    | ULK4      | ULK4                       | ULK4           | 85204                      |
| LTA-PP | rs9846634  | 3p22 | 41869053  | a           | g       | -0.4764 | 0.0829 | 2.22E-08 | -----     | ULK4      | ULK4                       | ULK4           | 109611                     |
| LTA-PP | rs7650227  | 3p22 | 41769941  | t           | g       | 0.5006  | 0.0821 | 2.84E-09 | ++++++    | ULK4      | ULK4                       | ULK4           | 208723                     |
| LTA-PP | rs1994157  | 3p22 | 41872486  | a           | g       | -0.4734 | 0.0826 | 2.42E-08 | -----     | ULK4      | ULK4                       | ULK4           | 106178                     |
| LTA-PP | rs9875107  | 3p22 | 41797317  | a           | t       | 0.4767  | 0.0822 | 1.64E-08 | ++++++    | ULK4      | ULK4                       | ULK4           | 181347                     |
| LTA-PP | rs11923562 | 3p22 | 41735335  | t           | g       | -0.4917 | 0.0819 | 5.06E-09 | -----     | ULK4      | ULK4                       | ULK4           | 243329                     |
| LTA-PP | rs7626217  | 3p22 | 41817419  | a           | g       | 0.47    | 0.0821 | 2.52E-08 | ++++++    | ULK4      | ULK4                       | ULK4           | 161245                     |
| LTA-PP | rs17060961 | 3p22 | 41738715  | a           | g       | 0.4946  | 0.0819 | 4.19E-09 | ++++++    | ULK4      | ULK4                       | ULK4           | 239949                     |
| LTA-PP | rs794902   | 3p22 | 42000943  | t           | c       | -0.5158 | 0.0861 | 5.47E-09 | -----     | NA        | ULK4                       | ULK4           | 22279                      |
| LTA-PP | rs6599167  | 3p22 | 41725284  | a           | g       | 0.5184  | 0.0886 | 6.34E-09 | ++++++    | ULK4      | ULK4                       | ULK4           | 253400                     |
| LTA-PP | rs12635286 | 3p22 | 42026840  | t           | c       | 0.4858  | 0.0867 | 4.95E-08 | ++++++    | NA        | ULK4                       | ULK4           | 48176                      |
| LTA-PP | rs1716842  | 3p22 | 41940869  | a           | c       | -0.4835 | 0.0823 | 1.06E-08 | -----     | ULK4      | ULK4                       | ULK4           | 37795                      |
| LTA-PP | rs7648578  | 3p22 | 41833735  | t           | c       | -0.4694 | 0.0821 | 2.55E-08 | -----     | ULK4      | ULK4                       | ULK4           | 144929                     |
| LTA-PP | rs7652506  | 3p22 | 42035239  | t           | c       | -0.49   | 0.0809 | 4.08E-08 | -----     | NA        | ULK4                       | ULK4           | 56575                      |
| LTA-PP | rs1308394  | 3p22 | 41926719  | a           | g       | 0.4824  | 0.0823 | 1.17E-08 | ++++++    | ULK4      | ULK4                       | ULK4           | 51945                      |
| LTA-PP | rs1716863  | 3p22 | 41960804  | t           | c       | 0.4857  | 0.0823 | 9.18E-09 | ++++++    | ULK4      | ULK4                       | ULK4           | 18960                      |
| LTA-PP | rs17063599 | 3p22 | 41836880  | t           | c       | -0.4743 | 0.0825 | 2.16E-08 | -----     | ULK4      | ULK4                       | ULK4           | 141994                     |
| LTA-PP | rs2272006  | 3p22 | 41972063  | t           | c       | 0.4891  | 0.082  | 6.77E-09 | ++++++    | ULK4      | ULK4                       | ULK4           | 6601                       |
| LTA-PP | rs6769128  | 3p22 | 41840084  | a           | g       | -0.4744 | 0.0825 | 2.19E-08 | -----     | ULK4      | ULK4                       | ULK4           | 138590                     |
| LTA-PP | rs6599179  | 3p22 | 41830288  | t           | c       | -0.4685 | 0.0821 | 2.70E-08 | -----     | ULK4      | ULK4                       | ULK4           | 148376                     |

| Trait  | SNPID      | Chr  | Position  | Bui Allele1 | Allele2 | Beta    | s.e.   | P        | Direction | InRefGene | RefGenes 60kbfromSNP | ClosestRefGene | DistanceFromClosestRefGene |
|--------|------------|------|-----------|-------------|---------|---------|--------|----------|-----------|-----------|----------------------|----------------|----------------------------|
| LTA-PP | rs9642261  | 3p22 | 41797712  | a           | g       | -0.4745 | 0.0821 | 1.83E-08 | ----->    | ULK4      | ULK4                 | ULK4           | 180952                     |
| LTA-PP | rs9620192  | 3p22 | 41864285  | a           | g       | -0.4706 | 0.0827 | 2.96E-08 | ----->    | ULK4      | ULK4                 | ULK4           | 114379                     |
| LTA-PP | rs6793520  | 3p22 | 41840293  | c           | g       | 0.4748  | 0.0826 | 2.15E-08 | ++++++>   | ULK4      | ULK4                 | ULK4           | 138371                     |
| LTA-PP | rs9676960  | 3p22 | 41960816  | t           | c       | 0.4856  | 0.0823 | 9.17E-09 | ++++++>   | ULK4      | ULK4                 | ULK4           | 17848                      |
| LTA-PP | rs1716683  | 3p22 | 41898078  | a           | g       | -0.4769 | 0.0824 | 1.78E-08 | ----->    | ULK4      | ULK4                 | ULK4           | 80586                      |
| LTA-PP | rs6599175  | 3p22 | 41761013  | t           | c       | 0.4966  | 0.0816 | 3.18E-09 | ++++++>   | ULK4      | ULK4                 | ULK4           | 217651                     |
| LTA-PP | rs13325905 | 3p22 | 41889946  | t           | g       | -0.4752 | 0.0825 | 2.04E-08 | ----->    | ULK4      | ULK4                 | ULK4           | 88716                      |
| LTA-PP | rs9652303  | 3p22 | 41734529  | t           | c       | -0.483  | 0.0819 | 9.49E-09 | ----->    | ULK4      | ULK4                 | ULK4           | 244135                     |
| LTA-PP | rs794899   | 3p22 | 42003726  | t           | c       | -0.5166 | 0.0861 | 5.22E-09 | ----->    | NA        | ULK4                 | ULK4           | 25062                      |
| LTA-PP | rs13225723 | 7q22 | 106203703 | a           | g       | 0.6031  | 0.0827 | 1.26E-12 | ++++++>   | NA        | NA                   | PIK3CG         | 89456                      |
| LTA-PP | rs9615354  | 3p22 | 41887655  | a           | g       | -0.5025 | 0.0855 | 1.05E-08 | ----->    | ULK4      | ULK4                 | ULK4           | 91009                      |
| LTA-PP | rs13084436 | 3p22 | 41992541  | a           | t       | 0.5181  | 0.0861 | 4.63E-09 | ++++++>   | NA        | ULK4                 | ULK4           | 13877                      |
| LTA-PP | rs704964   | 3p22 | 42028903  | a           | g       | 0.4921  | 0.0866 | 3.18E-08 | ++++++>   | NA        | ULK4                 | ULK4           | 50239                      |
| LTA-PP | rs9657175  | 3p22 | 41797058  | t           | g       | 0.4772  | 0.0822 | 1.59E-08 | ++++++>   | ULK4      | ULK4                 | ULK4           | 181606                     |
| LTA-PP | rs3934103  | 3p22 | 41952218  | t           | c       | 0.4848  | 0.0823 | 9.77E-09 | ++++++>   | ULK4      | ULK4                 | ULK4           | 26446                      |
| LTA-PP | rs3774372  | 3p22 | 41852418  | t           | c       | 0.4718  | 0.0825 | 2.62E-08 | ++++++>   | ULK4      | ULK4                 | ULK4           | 126246                     |

"Direction" corresponds to order of cohorts as listed in Supplementary Table 3.

**Table S5: eQTL analysis results for the index SNP in each of the 39 loci identified in the analysis of LTA BP traits and for which eQTL data was available.**

| IndexSNP   | Traits      | InRefGene | RefGenes60kb                          | Locus# | Index/LD status   | r <sup>2</sup> to index | eSNPid     | Tissue                                   | eSNP P value     | Chr | B36pos   | ArrayID       | Transcript        | type of eQTL (cis or trans) | Beta  | Allele | Probe Chromosome | Probe Position |
|------------|-------------|-----------|---------------------------------------|--------|-------------------|-------------------------|------------|------------------------------------------|------------------|-----|----------|---------------|-------------------|-----------------------------|-------|--------|------------------|----------------|
| rs13306561 | DBP/SBP/MAF | MTHFR     | NPPB;NPPA-AS1;CLCN6;MTHFR;NPPA;AGTRAP | 1      | IndexSNP          |                         | rs13306561 | Whole blood (CHARGE)                     | 2.19E-72         | 1   | 11788391 | 3990477       | MTHFR,Clorf167    | cis                         | 17.99 | G      | 1                | 11769609       |
| rs13306561 | DBP/SBP/MAF | MTHFR     | NPPB;NPPA-AS1;CLCN6;MTHFR;NPPA;AGTRAP | 1      | IndexSNP          |                         | rs13306561 | LCL (MuTHER)                             | 1.91E-16         | 1   | 11788391 | ILMN_1734830  | MTHFR             | cis                         |       |        |                  |                |
| rs13306561 | DBP/SBP/MAF | MTHFR     | NPPB;NPPA-AS1;CLCN6;MTHFR;NPPA;AGTRAP | 1      | IndexSNP          |                         | rs13306561 | Whole blood (PaxGene) in Japanese        | 1.20E-09         | 1   | 11788391 | A_23_P400081  | MTHFR             | cis                         | 0.63  |        |                  |                |
| rs13306561 | DBP/SBP/MAF | MTHFR     | NPPB;NPPA-AS1;CLCN6;MTHFR;NPPA;AGTRAP | 1      | IndexSNP          |                         | rs13306561 | Skin (MuTHER)                            | 2.36E-06         | 1   | 11788391 | ILMN_1734830  | MTHFR             | cis                         |       |        |                  |                |
| rs13306561 | DBP/SBP/MAF | MTHFR     | NPPB;NPPA-AS1;CLCN6;MTHFR;NPPA;AGTRAP | 1      | IndexSNP          |                         | rs13306561 | Subc adipose (MuTHER)                    | 5.98E-06         | 1   | 11788391 | ILMN_1734830  | MTHFR             | cis                         |       |        |                  |                |
| rs13306561 | DBP/SBP/MAF | MTHFR     | NPPB;NPPA-AS1;CLCN6;MTHFR;NPPA;AGTRAP | 1      | LDproxy (CEU-H3)  | 1                       | rs2050265  | Whole blood (CHARGE)                     | 2.21E-78         | 1   | 11802286 | 3990477       | MTHFR,Clorf167    | cis                         | 18.74 | T      | 1                | 11769609       |
| rs13306561 | DBP/SBP/MAF | MTHFR     | NPPB;NPPA-AS1;CLCN6;MTHFR;NPPA;AGTRAP | 1      | LDproxy (CEU-H3)  | 1                       | rs12567136 | Whole blood (CHARGE)                     | 2.64E-78         | 1   | 11806318 | 3990477       | MTHFR,Clorf167    | cis                         | 18.73 | T      | 1                | 11769609       |
| rs13306561 | DBP/SBP/MAF | MTHFR     | NPPB;NPPA-AS1;CLCN6;MTHFR;NPPA;AGTRAP | 1      | LDproxy (CEU-H3)  | 1                       | rs7537765  | Whole blood (CHARGE)                     | 3.23E-78         | 1   | 11809890 | 3990477       | MTHFR,Clorf167    | cis                         | 18.72 | G      | 1                | 11769609       |
| rs13306561 | DBP/SBP/MAF | MTHFR     | NPPB;NPPA-AS1;CLCN6;MTHFR;NPPA;AGTRAP | 1      | LDproxy (CEU-H3)  | 1                       | rs12567136 | LCL (MuTHER)                             | 5.77E-19         | 1   | 11806318 | ILMN_1734830  | MTHFR             | cis                         |       |        |                  |                |
| rs13306561 | DBP/SBP/MAF | MTHFR     | NPPB;NPPA-AS1;CLCN6;MTHFR;NPPA;AGTRAP | 1      | LDproxy (CEU-H3)  | 1                       | rs2050265  | LCL (MuTHER)                             | 8.49E-19         | 1   | 11802286 | ILMN_1734830  | MTHFR             | cis                         |       |        |                  |                |
| rs13306561 | DBP/SBP/MAF | MTHFR     | NPPB;NPPA-AS1;CLCN6;MTHFR;NPPA;AGTRAP | 1      | LDproxy (CEU-H3)  | 1                       | rs7537765  | LCL (MuTHER)                             | 2.10E-18         | 1   | 11809890 | ILMN_1734830  | MTHFR             | cis                         |       |        |                  |                |
| rs13306561 | DBP/SBP/MAF | MTHFR     | NPPB;NPPA-AS1;CLCN6;MTHFR;NPPA;AGTRAP | 1      | LDproxy (CEU-H3)  | 1                       | rs12567136 | Monocytes                                | 3.57E-14         | 1   | 11806318 |               | MTHFR             | cis                         |       |        |                  |                |
| rs13306561 | DBP/SBP/MAF | MTHFR     | NPPB;NPPA-AS1;CLCN6;MTHFR;NPPA;AGTRAP | 1      | LDproxy (CEU-H3)  | 1                       | rs7537765  | Monocytes                                | 1.14E-13         | 1   | 11809890 |               | MTHFR             | cis                         |       |        |                  |                |
| rs13306561 | DBP/SBP/MAF | MTHFR     | NPPB;NPPA-AS1;CLCN6;MTHFR;NPPA;AGTRAP | 1      | LDproxy (CEU-H3)  | 1                       | rs17037429 | Monocytes                                | 2.33E-13         | 1   | 11796374 |               | MTHFR             | cis                         |       |        |                  |                |
| rs13306561 | DBP/SBP/MAF | MTHFR     | NPPB;NPPA-AS1;CLCN6;MTHFR;NPPA;AGTRAP | 1      | LDproxy (CEU-H3)  | 1                       | rs7537765  | PaxGeneWholeBlood(Mehta)                 | 8.44E-10         | 1   | 11809890 | ILMN_1731434  | MTHFR             | cis                         |       |        |                  |                |
| rs13306561 | DBP/SBP/MAF | MTHFR     | NPPB;NPPA-AS1;CLCN6;MTHFR;NPPA;AGTRAP | 1      | LDproxy (CEU-H3)  | 1                       | rs12567136 | Whole blood (PaxGene) in Japanese        | 1.20E-09         | 1   | 11806318 | A_23_P400081  | MTHFR             | cis                         | -0.63 |        |                  |                |
| rs13306561 | DBP/SBP/MAF | MTHFR     | NPPB;NPPA-AS1;CLCN6;MTHFR;NPPA;AGTRAP | 1      | LDproxy (CEU-H3)  | 1                       | rs2050265  | Whole blood (PaxGene) in Japanese        | 1.20E-09         | 1   | 11802286 | A_23_P400081  | MTHFR             | cis                         | 0.63  |        |                  |                |
| rs13306561 | DBP/SBP/MAF | MTHFR     | NPPB;NPPA-AS1;CLCN6;MTHFR;NPPA;AGTRAP | 1      | LDproxy (CEU-H3)  | 1                       | rs753584   | Whole blood (PaxGene) in Japanese        | 1.20E-09         | 1   | 11787173 | A_23_P400081  | MTHFR             | cis                         | 0.63  |        |                  |                |
| rs13306561 | DBP/SBP/MAF | MTHFR     | NPPB;NPPA-AS1;CLCN6;MTHFR;NPPA;AGTRAP | 1      | LDproxy (CEU-H3)  | 1                       | rs12567136 | PaxGeneWholeBlood(Mehta)                 | 1.44E-09         | 1   | 11806318 | ILMN_1731434  | MTHFR             | cis                         |       |        |                  |                |
| rs13306561 | DBP/SBP/MAF | MTHFR     | NPPB;NPPA-AS1;CLCN6;MTHFR;NPPA;AGTRAP | 1      | LDproxy (CEU-H3)  | 1                       | rs7537765  | Whole blood (PaxGene) in Japanese        | 2.16E-09         | 1   | 11809890 | A_23_P400081  | MTHFR             | cis                         | 0.62  |        |                  |                |
| rs13306561 | DBP/SBP/MAF | MTHFR     | NPPB;NPPA-AS1;CLCN6;MTHFR;NPPA;AGTRAP | 1      | LDproxy (CEU-H3)  | 1                       | rs7537765  | SchadtLiver                              | 1.37E-07         | 1   | 11809890 |               | CLCN6             | cis                         |       |        |                  |                |
| rs13306561 | DBP/SBP/MAF | MTHFR     | NPPB;NPPA-AS1;CLCN6;MTHFR;NPPA;AGTRAP | 1      | LDproxy (CEU-H3)  | 1                       | rs12567136 | Skin (MuTHER)                            | 1.44E-07         | 1   | 11806318 | ILMN_1734830  | MTHFR             | cis                         |       |        |                  |                |
| rs13306561 | DBP/SBP/MAF | MTHFR     | NPPB;NPPA-AS1;CLCN6;MTHFR;NPPA;AGTRAP | 1      | LDproxy (CEU-H3)  | 1                       | rs2050265  | Skin (MuTHER)                            | 1.50E-07         | 1   | 11802286 | ILMN_1734830  | MTHFR             | cis                         |       |        |                  |                |
| rs13306561 | DBP/SBP/MAF | MTHFR     | NPPB;NPPA-AS1;CLCN6;MTHFR;NPPA;AGTRAP | 1      | LDproxy (CEU-H3)  | 1                       | rs7537765  | Skin (MuTHER)                            | 3.50E-07         | 1   | 11809890 | ILMN_1734830  | MTHFR             | cis                         |       |        |                  |                |
| rs13306561 | DBP/SBP/MAF | MTHFR     | NPPB;NPPA-AS1;CLCN6;MTHFR;NPPA;AGTRAP | 1      | LDproxy (CEU-H3)  | 1                       | rs12567136 | Subc adipose (MuTHER)                    | 5.39E-07         | 1   | 11806318 | ILMN_1734830  | MTHFR             | cis                         |       |        |                  |                |
| rs13306561 | DBP/SBP/MAF | MTHFR     | NPPB;NPPA-AS1;CLCN6;MTHFR;NPPA;AGTRAP | 1      | LDproxy (CEU-H3)  | 1                       | rs2050265  | Subc adipose (MuTHER)                    | 6.63E-07         | 1   | 11802286 | ILMN_1734830  | MTHFR             | cis                         |       |        |                  |                |
| rs13306561 | DBP/SBP/MAF | MTHFR     | NPPB;NPPA-AS1;CLCN6;MTHFR;NPPA;AGTRAP | 1      | LDproxy (CEU-H3)  | 1                       | rs7537765  | Subc adipose (MuTHER)                    | 8.64E-07         | 1   | 11809890 | ILMN_1734830  | MTHFR             | cis                         |       |        |                  |                |
| rs13306561 | DBP/SBP/MAF | MTHFR     | NPPB;NPPA-AS1;CLCN6;MTHFR;NPPA;AGTRAP | 1      | LDproxy (CEU-H3)  | 1                       | rs7537765  | Liver(Greenawalt)                        | 1.02E-06         | 1   | 11809890 | 10023816366   | CLCN6             | cis                         |       |        |                  |                |
| rs13306561 | DBP/SBP/MAF | MTHFR     | NPPB;NPPA-AS1;CLCN6;MTHFR;NPPA;AGTRAP | 1      | LDproxy (CEU-H3)  | 1                       | rs7537765  | Lymph                                    | 1.67E-06         | 1   | 11809890 | GI_12025672-A | CLCN6             | cis                         |       |        |                  |                |
| rs13306561 | DBP/SBP/MAF | MTHFR     | NPPB;NPPA-AS1;CLCN6;MTHFR;NPPA;AGTRAP | 1      | LDproxy (CEU-H3)  | 1                       | rs12567136 | Dendritic cells after Mycobacterium tube | 2.41E-06         | 1   | 11806318 |               | MTHFR             | cis                         |       |        |                  |                |
| rs13306561 | DBP/SBP/MAF | MTHFR     | NPPB;NPPA-AS1;CLCN6;MTHFR;NPPA;AGTRAP | 1      | LDproxy (CEU-H3)  | 0.97                    | rs17037390 | Whole blood (CHARGE)                     | 7.04E-83         | 1   | 11783430 | 3990477       | MTHFR,Clorf167    | cis                         | 19.29 | A      | 1                | 11769609       |
| rs13306561 | DBP/SBP/MAF | MTHFR     | NPPB;NPPA-AS1;CLCN6;MTHFR;NPPA;AGTRAP | 1      | LDproxy (CEU-H3)  | 0.97                    | rs17367504 | Whole blood (CHARGE)                     | 2.88E-79         | 1   | 11785365 | 3990477       | MTHFR,Clorf167    | cis                         | 18.85 | G      | 1                | 11769609       |
| rs13306561 | DBP/SBP/MAF | MTHFR     | NPPB;NPPA-AS1;CLCN6;MTHFR;NPPA;AGTRAP | 1      | LDproxy (CEU-H3)  | 0.97                    | rs17037390 | LCL (MuTHER)                             | 5.45E-18         | 1   | 11783430 | ILMN_1734830  | MTHFR             | cis                         |       |        |                  |                |
| rs13306561 | DBP/SBP/MAF | MTHFR     | NPPB;NPPA-AS1;CLCN6;MTHFR;NPPA;AGTRAP | 1      | LDproxy (CEU-H3)  | 0.97                    | rs17367504 | LCL (MuTHER)                             | 7.40E-18         | 1   | 11785365 | ILMN_1734830  | MTHFR             | cis                         |       |        |                  |                |
| rs13306561 | DBP/SBP/MAF | MTHFR     | NPPB;NPPA-AS1;CLCN6;MTHFR;NPPA;AGTRAP | 1      | LDproxy (CEU-H3)  | 0.97                    | rs17037390 | Whole blood (PaxGene) in Japanese        | 1.20E-09         | 1   | 11783430 | A_23_P400081  | MTHFR             | cis                         | -0.63 |        |                  |                |
| rs13306561 | DBP/SBP/MAF | MTHFR     | NPPB;NPPA-AS1;CLCN6;MTHFR;NPPA;AGTRAP | 1      | LDproxy (CEU-H3)  | 0.97                    | rs17367504 | Whole blood (PaxGene) in Japanese        | 1.20E-09         | 1   | 11785365 | A_23_P400081  | MTHFR             | cis                         | 0.63  |        |                  |                |
| rs13306561 | DBP/SBP/MAF | MTHFR     | NPPB;NPPA-AS1;CLCN6;MTHFR;NPPA;AGTRAP | 1      | LDproxy (CEU-H3)  | 0.97                    | rs17037390 | Subc adipose (MuTHER)                    | 2.66E-07         | 1   | 1183430  | ILMN_1734830  | MTHFR             | cis                         |       |        |                  |                |
| rs13306561 | DBP/SBP/MAF | MTHFR     | NPPB;NPPA-AS1;CLCN6;MTHFR;NPPA;AGTRAP | 1      | LDproxy (CEU-H3)  | 0.97                    | rs17037390 | Skin (MuTHER)                            | 5.16E-07         | 1   | 11783430 | ILMN_1734830  | MTHFR             | cis                         |       |        |                  |                |
| rs13306561 | DBP/SBP/MAF | MTHFR     | NPPB;NPPA-AS1;CLCN6;MTHFR;NPPA;AGTRAP | 1      | LDproxy (CEU-H3)  | 0.97                    | rs17367504 | Subc adipose (MuTHER)                    | 6.16E-07         | 1   | 11785365 | ILMN_1734830  | MTHFR             | cis                         |       |        |                  |                |
| rs13306561 | DBP/SBP/MAF | MTHFR     | NPPB;NPPA-AS1;CLCN6;MTHFR;NPPA;AGTRAP | 1      | LDproxy (CEU-H3)  | 0.97                    | rs17367504 | Skin (MuTHER)                            | 7.50E-07         | 1   | 11785365 | ILMN_1734830  | MTHFR             | cis                         |       |        |                  |                |
| rs13306561 | DBP/SBP/MAF | MTHFR     | NPPB;NPPA-AS1;CLCN6;MTHFR;NPPA;AGTRAP | 1      | LDproxy (CEU-H3)  | 0.97                    | rs17367504 | Liver (ScanDB)                           | 9.54E-07         | 1   | 11785365 |               | GPR116            | cis                         |       |        |                  |                |
| rs13306561 | DBP/SBP/MAF | MTHFR     | NPPB;NPPA-AS1;CLCN6;MTHFR;NPPA;AGTRAP | 1      | LDproxy (CEU-H3)  | 0.97                    | rs17367504 | Lymph                                    | 1.54E-05         | 1   | 11785365 | GI_12025672-A | CLCN6             | cis                         |       |        |                  |                |
| rs13306561 | DBP/SBP/MAF | MTHFR     | NPPB;NPPA-AS1;CLCN6;MTHFR;NPPA;AGTRAP | 1      | LDproxy (CEU-H3)  | 0.97                    | rs17367504 | omental                                  | 7.21E-05         | 1   | 11785365 | 10025934633   | HSS00048903       | cis                         |       |        |                  |                |
| rs13306561 | DBP/SBP/MAF | MTHFR     | NPPB;NPPA-AS1;CLCN6;MTHFR;NPPA;AGTRAP | 1      | LDproxy (CEU-H3)  | 0.97                    | rs17367504 | Blood(Fehrmann et al)                    | 1.50E-27;1.9E-19 | 1   | 11818262 | 60437         | MTHFR;AL953897;6C | cis                         |       |        |                  |                |
| rs13306561 | DBP/SBP/MAF | MTHFR     | NPPB;NPPA-AS1;CLCN6;MTHFR;NPPA;AGTRAP | 1      | LDproxy (CEU-1kg) | 0.947                   | rs17037452 | LCL (MuTHER)                             | 6.00E-24         | 1   | 11818262 | ILMN_1734830  | MTHFR             | cis                         |       |        |                  |                |
| rs13306561 | DBP/SBP/MAF | MTHFR     | NPPB;NPPA-AS1;CLCN6;MTHFR;NPPA;AGTRAP | 1      | LDproxy (CEU-1kg) | 0.947                   | rs17037452 | Whole blood (PaxGene) in Japanese        | 1.20E-09         | 1   | 11818262 | A_23_P400081  | MTHFR             | cis                         | 0.63  |        |                  |                |
| rs13306561 | DBP/SBP/MAF | MTHFR     | NPPB;NPPA-AS1;CLCN6;MTHFR;NPPA;AGTRAP | 1      | LDproxy (CEU-1kg) | 0.947                   | rs17037452 | Skin (MuTHER)                            | 3.72E-09         | 1   | 11818262 | ILMN_1734830  | MTHFR             | cis                         |       |        |                  |                |
| rs13306561 | DBP/SBP/MAF | MTHFR     | NPPB;NPPA-AS1;CLCN6;MTHFR;NPPA;AGTRAP | 1      | LDproxy (CEU-1kg) | 0.947                   | rs17037452 | Subc adipose (MuTHER)                    | 1.56E-07         | 1   | 11818262 | ILMN_1741594  | CLCN6             | cis                         |       |        |                  |                |
| rs13306561 | DBP/SBP/MAF | MTHFR     | NPPB;NPPA-AS1;CLCN6;MTHFR;NPPA;AGTRAP | 1      | LDproxy (CEU-1kg) | 0.947                   | rs17037452 | Whole blood (CHARGE)                     | 1.66E-07         | 1   | 11818262 | 60437         | PLOD1             | cis                         | -5.23 | G      | 1                | 11958130       |
| rs13306561 | DBP/SBP/MAF | MTHFR     | NPPB;NPPA-AS1;CLCN6;MTHFR;NPPA;AGTRAP | 1      | LDproxy (CEU-H3)  | 0.853                   | rs17037425 | Whole blood (CHARGE)                     | 7.97E-95         | 1   | 11792970 | 3990477       | MTHFR,Clorf167    | cis                         | 20.66 | A      | 1                | 11769609       |
| rs13306561 | DBP/SBP/MAF | MTHFR     | NPPB;NPPA-AS1;CLCN6;MTHFR;NPPA;AGTRAP | 1      | LDproxy (CEU-H3)  | 0.853                   | rs17037425 | Skin (MuTHER)                            | 5.98E-20         | 1   | 11792970 | ILMN_1734830  | MTHFR             | cis                         |       |        |                  |                |
| rs13306561 | DBP/SBP/MAF | MTHFR     | NPPB;NPPA-AS1;CLCN6;MTHFR;NPPA;AGTRAP | 1      | LDproxy (CEU-H3)  | 0.853                   | rs17037425 | Whole blood (PaxGene) in Japanese        | 1.20E-09         | 1   | 11792970 | A_23_P400081  | MTHFR             | cis                         | -0.63 |        |                  |                |
| rs13306561 | DBP/SBP/MAF | MTHFR     | NPPB;NPPA-AS1;CLCN6;MTHFR;NPPA;AGTRAP | 1      | LDproxy (CEU-H3)  | 0.853                   | rs17037425 | Skin (MuTHER)                            | 1.03E-08         | 1   | 11792970 | ILMN_1734830  | MTHFR             | cis                         |       |        |                  |                |
| rs13306561 | DBP/SBP/MAF | MTHFR     | NPPB;NPPA-AS1;CLCN6;MTHFR;NPPA;AGTRAP | 1      | LDproxy (CEU-H3)  | 0.853                   | rs17037425 | Subc adipose (MuTHER)                    | 2.22E-08         | 1   | 11792970 | ILMN_1734830  | MTHFR             | cis                         |       |        |                  |                |
| rs13306561 | DBP/SBP/MAF | MTHFR     | NPPB;NPPA-AS1;CLCN6;MTHFR;NPPA;AGTRAP | 1      | LDproxy (CEU-H3)  | 0.853                   | rs17037425 | Liver(Chicago)                           | 0.00017275       | 1   | 11792970 | A_24_P302374  | CLCN6             | cis                         |       |        |                  |                |
| rs13306561 | DBP/SBP/MAF | MTHFR     | NPPB;NPPA-AS1;CLCN6;MTHFR;NPPA;AGTRAP | 1      | LDproxy (CEU-H3)  | 0.713                   |            |                                          |                  |     |          |               |                   |                             |       |        |                  |                |



| IndexSNP   | Traits      | InRefGene | RefGenes60kb                          | Locus# | Index/LD status   | r <sup>2</sup> to index | eSNPid    | Tissue                            | eSNP P value     | Chr | B36pos    | ArrayID         | Transcript         | type of eQTL (cis or trans) | Beta  | Allele | Probe Chromosome | Probe Position |
|------------|-------------|-----------|---------------------------------------|--------|-------------------|-------------------------|-----------|-----------------------------------|------------------|-----|-----------|-----------------|--------------------|-----------------------------|-------|--------|------------------|----------------|
| rs13306561 | DBP/SBP/MAP | MTHFR     | NPPB;NPPA-AS1;CLCN6;MTHFR;NPPA;AGTRAP | 1      | LDproxy(CEU-H3)   | 0.713                   | rs2236797 | LCL (MuTHER)                      | 5.44E-24         | 1   | 11815237  | ILMN_1734830    | MTHFR              | cis                         |       |        |                  |                |
| rs13306561 | DBP/SBP/MAP | MTHFR     | NPPB;NPPA-AS1;CLCN6;MTHFR;NPPA;AGTRAP | 1      | LDproxy(CEU-H3)   | 0.713                   | rs2075538 | LCL (MuTHER)                      | 5.56E-24         | 1   | 11819189  | ILMN_1734830    | MTHFR              | cis                         |       |        |                  |                |
| rs13306561 | DBP/SBP/MAP | MTHFR     | NPPB;NPPA-AS1;CLCN6;MTHFR;NPPA;AGTRAP | 1      | LDproxy(CEU-H3)   | 0.713                   | rs2236797 | PaxGeneWholeBlood(Mehta)          | 1.64E-11         | 1   | 11815237  | ILMN_1731434    | MTHFR              | cis                         |       |        |                  |                |
| rs13306561 | DBP/SBP/MAP | MTHFR     | NPPB;NPPA-AS1;CLCN6;MTHFR;NPPA;AGTRAP | 1      | LDproxy(CEU-H3)   | 0.713                   | rs2075538 | Whole blood (PaxGene) in Japanese | 7.49E-10         | 1   | 11819189  | A_23_P400081    | MTHFR              | cis                         | 0.64  |        |                  |                |
| rs13306561 | DBP/SBP/MAP | MTHFR     | NPPB;NPPA-AS1;CLCN6;MTHFR;NPPA;AGTRAP | 1      | LDproxy(CEU-H3)   | 0.713                   | rs2236797 | Whole blood (PaxGene) in Japanese | 1.20E-09         | 1   | 11815237  | A_23_P400081    | MTHFR              | cis                         | -0.63 |        |                  |                |
| rs13306561 | DBP/SBP/MAP | MTHFR     | NPPB;NPPA-AS1;CLCN6;MTHFR;NPPA;AGTRAP | 1      | LDproxy(CEU-H3)   | 0.713                   | rs7553194 | Whole blood (PaxGene) in Japanese | 1.20E-09         | 1   | 11786736  | A_23_P400081    | MTHFR              | cis                         | -0.63 |        |                  |                |
| rs13306561 | DBP/SBP/MAP | MTHFR     | NPPB;NPPA-AS1;CLCN6;MTHFR;NPPA;AGTRAP | 1      | LDproxy(CEU-H3)   | 0.713                   | rs7553194 | Skin (MuTHER)                     | 2.04E-09         | 1   | 11786736  | ILMN_1734830    | MTHFR              | cis                         |       |        |                  |                |
| rs13306561 | DBP/SBP/MAP | MTHFR     | NPPB;NPPA-AS1;CLCN6;MTHFR;NPPA;AGTRAP | 1      | LDproxy(CEU-H3)   | 0.713                   | rs2075538 | RNAseq(HapMapLCL)+DeepSage(blood) | 3.48E-09         | 1   | 11896602  | ENST0000037659  | MTHFR              | cis                         |       |        |                  |                |
| rs13306561 | DBP/SBP/MAP | MTHFR     | NPPB;NPPA-AS1;CLCN6;MTHFR;NPPA;AGTRAP | 1      | LDproxy(CEU-H3)   | 0.713                   | rs2075538 | Skin (MuTHER)                     | 3.56E-09         | 1   | 11819189  | ILMN_1734830    | MTHFR              | cis                         |       |        |                  |                |
| rs13306561 | DBP/SBP/MAP | MTHFR     | NPPB;NPPA-AS1;CLCN6;MTHFR;NPPA;AGTRAP | 1      | LDproxy(CEU-H3)   | 0.713                   | rs2236797 | Skin (MuTHER)                     | 3.63E-09         | 1   | 11815237  | ILMN_1734830    | MTHFR              | cis                         |       |        |                  |                |
| rs13306561 | DBP/SBP/MAP | MTHFR     | NPPB;NPPA-AS1;CLCN6;MTHFR;NPPA;AGTRAP | 1      | LDproxy(CEU-H3)   | 0.713                   | rs2075538 | Whole blood (CHARGE)              | 1.32E-07         | 1   | 11819189  | 60437           | PLOD1              | cis                         | -5.28 | C      | 1                | 11958130       |
| rs13306561 | DBP/SBP/MAP | MTHFR     | NPPB;NPPA-AS1;CLCN6;MTHFR;NPPA;AGTRAP | 1      | LDproxy(CEU-H3)   | 0.713                   | rs7553194 | Whole blood (CHARGE)              | 1.46E-07         | 1   | 11786736  | 60437           | PLOD1              | cis                         | -5.26 | A      | 1                | 11958130       |
| rs13306561 | DBP/SBP/MAP | MTHFR     | NPPB;NPPA-AS1;CLCN6;MTHFR;NPPA;AGTRAP | 1      | LDproxy(CEU-H3)   | 0.713                   | rs2236797 | Subc adipose (MuTHER)             | 1.65E-07         | 1   | 11815237  | ILMN_1741594    | CLCN6              | cis                         |       |        |                  |                |
| rs13306561 | DBP/SBP/MAP | MTHFR     | NPPB;NPPA-AS1;CLCN6;MTHFR;NPPA;AGTRAP | 1      | LDproxy(CEU-H3)   | 0.713                   | rs2236797 | Subc adipose (MuTHER)             | 1.75E-07         | 1   | 11819189  | ILMN_1741594    | CLCN6              | cis                         |       |        |                  |                |
| rs13306561 | DBP/SBP/MAP | MTHFR     | NPPB;NPPA-AS1;CLCN6;MTHFR;NPPA;AGTRAP | 1      | LDproxy(CEU-H3)   | 0.713                   | rs2236797 | Whole blood (CHARGE)              | 3.42E-07         | 1   | 11815237  | 60437           | PLOD1              | cis                         | -5.10 | T      | 1                | 11958130       |
| rs13306561 | DBP/SBP/MAP | MTHFR     | NPPB;NPPA-AS1;CLCN6;MTHFR;NPPA;AGTRAP | 1      | LDproxy(CEU-H3)   | 0.713                   | rs7553194 | Subc adipose (MuTHER)             | 4.13E-07         | 1   | 11786736  | ILMN_1741594    | CLCN6              | cis                         |       |        |                  |                |
| rs13306561 | DBP/SBP/MAP | MTHFR     | NPPB;NPPA-AS1;CLCN6;MTHFR;NPPA;AGTRAP | 1      | LDproxy(CEU-H3)   | 0.713                   | rs7553194 | Lung                              | 2.34E-06         | 1   | 11786736  | 100146210_TGI_ε | Unknown            | cis                         |       |        |                  |                |
| rs13306561 | DBP/SBP/MAP | MTHFR     | NPPB;NPPA-AS1;CLCN6;MTHFR;NPPA;AGTRAP | 1      | LDproxy(CEU-H3)   | 0.713                   | rs7553194 | Monocytes (CD14+)                 | 1.45E-05         | 1   | 11786736  | TIKVCU2UleS247  | CLCN6              | cis                         |       |        |                  |                |
| rs13306561 | DBP/SBP/MAP | MTHFR     | NPPB;NPPA-AS1;CLCN6;MTHFR;NPPA;AGTRAP | 1      | LDproxy(CEU-H3)   | 0.713                   | rs2236797 | Monocytes (CD14+)                 | 5.10E-05         | 1   | 11815237  | TIKVCU2UleS247  | CLCN6              | cis                         |       |        |                  |                |
| rs13306561 | DBP/SBP/MAP | MTHFR     | NPPB;NPPA-AS1;CLCN6;MTHFR;NPPA;AGTRAP | 1      | LDproxy(CEU-H3)   | 0.713                   | rs2236797 | Lymph                             | 0.00104498       | 1   | 11815237  | GI_12025672-A   | CLCN6              | cis                         |       |        |                  |                |
| rs13306561 | DBP/SBP/MAP | MTHFR     | NPPB;NPPA-AS1;CLCN6;MTHFR;NPPA;AGTRAP | 1      | LDproxy(CEU-H3)   | 0.713                   | rs2075538 | Monocytes                         | 1.43E-34;1.2E-1  | 1   | 11819189  |                 | MTHFR;CLCN6        | cis                         |       |        |                  |                |
| rs13306561 | DBP/SBP/MAP | MTHFR     | NPPB;NPPA-AS1;CLCN6;MTHFR;NPPA;AGTRAP | 1      | LDproxy(CEU-H3)   | 0.713                   | rs2236797 | Blood(Fehrmann et al)             | 4.70E-45;2.3E-1  | 1   | 11815237  | 3990477;Human   | MTHFR;AL953897.6;A | cis                         |       |        |                  |                |
| rs2004776  | DBP/MAP     | AGT       | COG2;AGT;CAPN9                        | 2      | IndexSNP          |                         | rs2004776 | Cerebellum (ScanDB)               | 2.19E-09         | 1   | 228915325 |                 | AGT                | cis                         |       |        |                  |                |
| rs2004776  | DBP/MAP     | AGT       | COG2;AGT;CAPN9                        | 2      | LDproxy(CEU-H3)   | 0.754                   | rs1326888 | Cerebellum (ScanDB)               | 5.13E-10         | 1   | 228929783 |                 | AGT                | cis                         |       |        |                  |                |
| rs7599598  | DBP         | FER1L5    | LMAN2L;KIAA1310;FER1L5                | 3      | IndexSNP          |                         | rs7599598 | Lung                              | 2.17E-09         | 2   | 96715567  | 100134941_TGI_ε | CNNM4              | cis                         |       |        |                  |                |
| rs7599598  | DBP         | FER1L5    | LMAN2L;KIAA1310;FER1L5                | 3      | IndexSNP          |                         | rs7599598 | Whole blood (CHARGE)              | 5.38E-08         | 2   | 96715567  | 1190673         | LMAN2L             | cis                         | -5.44 | A      | 2                | 96735621       |
| rs7599598  | DBP         | FER1L5    | LMAN2L;KIAA1310;FER1L5                | 3      | IndexSNP          |                         | rs7599598 | Blood(Fehrmann et al)             | 1.70E-04         | 2   | 96715567  | 1190673         | LMAN2L             | cis                         |       |        |                  |                |
| rs7599598  | DBP         | FER1L5    | LMAN2L;KIAA1310;FER1L5                | 3      | IndexSNP          |                         | rs7599598 | Bcells (CD19+)                    | 0.0008951        | 2   | 96715567  | FQBx2EuV1Eh.le  | AR1D5A             | cis                         |       |        |                  |                |
| rs7599598  | DBP         | FER1L5    | LMAN2L;KIAA1310;FER1L5                | 3      | IndexSNP          |                         | rs7599598 | Lymph                             | 0.00281896       | 2   | 96715567  | GI_13540593-S   | LMAN2L             | cis                         |       |        |                  |                |
| rs7599598  | DBP         | FER1L5    | LMAN2L;KIAA1310;FER1L5                | 3      | LDproxy(CEU-H3)   | 0.806                   | rs7582249 | Whole blood (CHARGE)              | 2.20E-09         | 2   | 96827256  | 1190673         | LMAN2L             | cis                         | 5.98  | A      | 2                | 96735621       |
| rs7599598  | DBP         | FER1L5    | LMAN2L;KIAA1310;FER1L5                | 3      | LDproxy(CEU-H3)   | 0.806                   | rs7582249 | Skin (MuTHER)                     | 5.64E-06         | 2   | 96827256  | ILMN_1755221    | LMAN2L             | cis                         |       |        |                  |                |
| rs7599598  | DBP         | FER1L5    | LMAN2L;KIAA1310;FER1L5                | 3      | LDproxy(CEU-H3)   | 0.791                   | rs6727384 | Whole blood (Battle)              | 4.91E-46         | 2   | 97400324  |                 | CNNM4              | cis                         |       |        |                  |                |
| rs7599598  | DBP         | FER1L5    | LMAN2L;KIAA1310;FER1L5                | 3      | LDproxy(CEU-H3)   | 0.791                   | rs968470  | Whole blood (CHARGE)              | 2.52E-09         | 2   | 96787353  | 1190673         | LMAN2L             | cis                         | 5.96  | C      | 2                | 96735621       |
| rs7599598  | DBP         | FER1L5    | LMAN2L;KIAA1310;FER1L5                | 3      | LDproxy(CEU-H3)   | 0.791                   | rs7608661 | Whole blood (CHARGE)              | 3.01E-09         | 2   | 96823647  | 1190673         | LMAN2L             | cis                         | 5.93  | G      | 2                | 96735621       |
| rs7599598  | DBP         | FER1L5    | LMAN2L;KIAA1310;FER1L5                | 3      | LDproxy(CEU-H3)   | 0.791                   | rs6727384 | Whole blood (CHARGE)              | 3.03E-09         | 2   | 96764051  | 1190673         | LMAN2L             | cis                         | 5.93  | G      | 2                | 96735621       |
| rs7599598  | DBP         | FER1L5    | LMAN2L;KIAA1310;FER1L5                | 3      | LDproxy(CEU-H3)   | 0.791                   | rs7608661 | Blood(Fehrmann et al)             | 5.10E-06         | 2   | 96823647  | 1190673         | LMAN2L             | cis                         |       |        |                  |                |
| rs7599598  | DBP         | FER1L5    | LMAN2L;KIAA1310;FER1L5                | 3      | LDproxy(CEU-H3)   | 0.791                   | rs7608661 | Skin (MuTHER)                     | 5.41E-06         | 2   | 96823647  | ILMN_1755221    | LMAN2L             | cis                         |       |        |                  |                |
| rs7599598  | DBP         | FER1L5    | LMAN2L;KIAA1310;FER1L5                | 3      | LDproxy(CEU-H3)   | 0.791                   | rs6727384 | Skin (MuTHER)                     | 5.63E-06         | 2   | 96764051  | ILMN_1755221    | LMAN2L             | cis                         |       |        |                  |                |
| rs7599598  | DBP         | FER1L5    | LMAN2L;KIAA1310;FER1L5                | 3      | LDproxy(CEU-H3)   | 0.791                   | rs968470  | Skin (MuTHER)                     | 5.79E-06         | 2   | 96787353  | ILMN_1755221    | LMAN2L             | cis                         |       |        |                  |                |
| rs7599598  | DBP         | FER1L5    | LMAN2L;KIAA1310;FER1L5                | 3      | LDproxy(CEU-H3)   | 0.791                   | rs7608661 | Cerebellum (all samples)          | 1.79E-05         | 2   | 96823647  | 10025902983     | LMAN2L             | cis                         |       |        |                  |                |
| rs7599598  | DBP         | FER1L5    | LMAN2L;KIAA1310;FER1L5                | 3      | LDproxy(CEU-H3)   | 0.791                   | rs968470  | Lymph                             | 0.00232082       | 2   | 96787353  | GI_13540593-S   | LMAN2L             | cis                         |       |        |                  |                |
| rs7599598  | DBP         | FER1L5    | LMAN2L;KIAA1310;FER1L5                | 3      | LDproxy(CEU-H3)   | 0.791                   | rs968470  | Prefrontal cortex (all samples)   | 3.50E-02         | 2   | 96787353  | 10025902983     | LMAN2L             | cis                         |       |        |                  |                |
| rs7599598  | DBP         | FER1L5    | LMAN2L;KIAA1310;FER1L5                | 3      | LDproxy(CEU-H3)   | 0.791                   | rs7608661 | omental                           | 7.82E-09;2.21E-1 | 2   | 96823647  | 10023820566;100 | CNNM4;LMAN2L;AN    | cis                         |       |        |                  |                |
| rs7599598  | DBP         | FER1L5    | LMAN2L;KIAA1310;FER1L5                | 3      | LDproxy(CEU-1kg)  | 0.771                   | rs994430  | Whole blood (CHARGE)              | 2.78E-09         | 2   | 96802728  | 1190673         | LMAN2L             | cis                         | 5.94  | T      | 2                | 96735621       |
| rs7599598  | DBP         | FER1L5    | LMAN2L;KIAA1310;FER1L5                | 3      | LDproxy(CEU-1kg)  | 0.771                   | rs994430  | Skin (MuTHER)                     | 5.66E-06         | 2   | 96802728  | ILMN_1755221    | LMAN2L             | cis                         |       |        |                  |                |
| rs7599598  | DBP         | FER1L5    | LMAN2L;KIAA1310;FER1L5                | 3      | LDproxy(CEU-Rel2) | 0.757                   | rs6730773 | Lung                              | 1.74E-09         | 2   | 96805370  | 100141976_TGI_ε | LMAN2L             | cis                         |       |        |                  |                |
| rs7599598  | DBP         | FER1L5    | LMAN2L;KIAA1310;FER1L5                | 3      | LDproxy(CEU-Rel2) | 0.757                   | rs1318597 | Whole blood (CHARGE)              | 2.40E-09         | 2   | 96826822  | 1190673         | LMAN2L             | cis                         | 5.97  | C      | 2                | 96735621       |
| rs7599598  | DBP         | FER1L5    | LMAN2L;KIAA1310;FER1L5                | 3      | LDproxy(CEU-Rel2) | 0.757                   | rs6730773 | Whole blood (CHARGE)              | 3.04E-09         | 2   | 96805370  | 1190673         | LMAN2L             | cis                         | 5.93  | G      | 2                | 96735621       |
| rs7599598  | DBP         | FER1L5    | LMAN2L;KIAA1310;FER1L5                | 3      | LDproxy(CEU-Rel2) | 0.757                   | rs7586317 | Whole blood (CHARGE)              | 3.21E-09         | 2   | 96811558  | 1190673         | LMAN2L             | cis                         | 5.92  | A      | 2                | 96735621       |
| rs7599598  | DBP         | FER1L5    | LMAN2L;KIAA1310;FER1L5                | 3      | LDproxy(CEU-Rel2) | 0.757                   | rs1318597 | Skin (MuTHER)                     | 5.64E-06         | 2   | 96826822  | ILMN_1755221    | LMAN2L             | cis                         |       |        |                  |                |
| rs7599598  | DBP         | FER1L5    | LMAN2L;KIAA1310;FER1L5                | 3      | LDproxy(CEU-Rel2) | 0.757                   | rs7586317 | Skin (MuTHER)                     | 5.66E-06         | 2   | 96811558  | ILMN_1755221    | LMAN2L             | cis                         |       |        |                  |                |
| rs7599598  | DBP         | FER1L5    | LMAN2L;KIAA1310;FER1L5                | 3      | LDproxy(CEU-Rel2) | 0.757                   | rs6730773 | Skin (MuTHER)                     | 5.67E-06         | 2   | 96805370  | ILMN_1755221    | LMAN2L             | cis                         |       |        |                  |                |
| rs7599598  | DBP         | FER1L5    | LMAN2L;KIAA1310;FER1L5                | 3      | LDproxy(CEU-1kg)  | 0.735                   | rs6576984 | Whole blood (CHARGE)              | 1.39E-08         | 2   | 96818432  | 1190673         | LMAN2L             | cis                         | 5.68  | T      | 2                | 96735621       |
| rs7599598  | DBP         | FER1L5    | LMAN2L;KIAA1310;FER1L5                | 3      | LDproxy(CEU-1kg)  | 0.735                   | rs6576984 | Skin (MuTHER)                     | 6.41E-06         | 2   | 96818432  | ILMN_1755221    | LMAN2L             | cis                         |       |        |                  |                |
| rs7650227  | PP          | ULK4      | ULK4                                  | 4      | IndexSNP          |                         | rs7650227 | Intestine (normal ileum)          | 2.98E-05         | 3   | 41794937  |                 | ULK4               | cis                         |       |        |                  |                |
| rs7650227  | PP          | ULK4      | ULK4                                  | 4      | LDproxy(CEU-1kg)  | 1                       | rs1615243 | Whole blood (Battle)              | 2.92E-190        | 3   | 41965234  |                 | ULK4               | cis                         |       |        |                  |                |
| rs7650227  | PP          | ULK4      | ULK4                                  | 4      | LDproxy(CEU-1kg)  | 1                       | rs1052501 | omental                           | 4.79E-21         | 3   | 41900402  | 10025919071     | CTNNB1             | cis                         |       |        |                  |                |
| rs7650227  | PP          | ULK4      | ULK4                                  | 4      | LDproxy(CEU-1kg)  | 1                       | rs3934103 | Prefrontal cortex (all samples)   | 1.05E-19         | 3   | 41952218  | 10023809218     | ULK                |                             |       |        |                  |                |

| IndexSNP  | Traits | InRefGene | RefGenes60kb | Locus# | Index/LD status  | r <sup>2</sup> to index | eSNPid     | Tissue                       | eSNP P value | Chr | B36pos   | ArrayID     | Transcript | type of eQTL (cis or trans) | Beta | Allele | Probe Chromosome | Probe Position |
|-----------|--------|-----------|--------------|--------|------------------|-------------------------|------------|------------------------------|--------------|-----|----------|-------------|------------|-----------------------------|------|--------|------------------|----------------|
| rs7650227 | PP     | ULK4      | ULK4         | 4      | LDproxy(CEU-1kg) | 1                       | rs1716642  | Parietal lobe (ScanDB)       | 6.48E-17     | 3   | 41940869 |             | ULK4       | cis                         |      |        |                  |                |
| rs7650227 | PP     | ULK4      | ULK4         | 4      | LDproxy(CEU-1kg) | 1                       | rs2272007  | Parietal lobe (ScanDB)       | 7.20E-17     | 3   | 41971140 |             | ULK4       | cis                         |      |        |                  |                |
| rs7650227 | PP     | ULK4      | ULK4         | 4      | LDproxy(CEU-1kg) | 1                       | rs9856633  | Parietal lobe (ScanDB)       | 7.20E-17     | 3   | 41988854 |             | ULK4       | cis                         |      |        |                  |                |
| rs7650227 | PP     | ULK4      | ULK4         | 4      | LDproxy(CEU-1kg) | 1                       | rs1717020  | Parietal lobe (ScanDB)       | 7.21E-17     | 3   | 41956494 |             | ULK4       | cis                         |      |        |                  |                |
| rs7650227 | PP     | ULK4      | ULK4         | 4      | LDproxy(CEU-1kg) | 1                       | rs1717024  | Parietal lobe (ScanDB)       | 7.21E-17     | 3   | 41959892 |             | ULK4       | cis                         |      |        |                  |                |
| rs7650227 | PP     | ULK4      | ULK4         | 4      | LDproxy(CEU-1kg) | 1                       | rs10212536 | Parietal lobe (ScanDB)       | 2.54E-16     | 3   | 41802030 |             | ULK4       | cis                         |      |        |                  |                |
| rs7650227 | PP     | ULK4      | ULK4         | 4      | LDproxy(CEU-1kg) | 1                       | rs1052501  | Parietal lobe (ScanDB)       | 2.54E-16     | 3   | 42000386 |             | ULK4       | cis                         |      |        |                  |                |
| rs7650227 | PP     | ULK4      | ULK4         | 4      | LDproxy(CEU-1kg) | 1                       | rs13325965 | Parietal lobe (ScanDB)       | 2.54E-16     | 3   | 41889946 |             | ULK4       | cis                         |      |        |                  |                |
| rs7650227 | PP     | ULK4      | ULK4         | 4      | LDproxy(CEU-1kg) | 1                       | rs17062109 | Parietal lobe (ScanDB)       | 2.54E-16     | 3   | 41785368 |             | ULK4       | cis                         |      |        |                  |                |
| rs7650227 | PP     | ULK4      | ULK4         | 4      | LDproxy(CEU-1kg) | 1                       | rs1716685  | Parietal lobe (ScanDB)       | 2.54E-16     | 3   | 41900305 |             | ULK4       | cis                         |      |        |                  |                |
| rs7650227 | PP     | ULK4      | ULK4         | 4      | LDproxy(CEU-1kg) | 1                       | rs1717000  | Parietal lobe (ScanDB)       | 2.54E-16     | 3   | 41905223 |             | ULK4       | cis                         |      |        |                  |                |
| rs7650227 | PP     | ULK4      | ULK4         | 4      | LDproxy(CEU-1kg) | 1                       | rs1717006  | Parietal lobe (ScanDB)       | 2.54E-16     | 3   | 41915452 |             | ULK4       | cis                         |      |        |                  |                |
| rs7650227 | PP     | ULK4      | ULK4         | 4      | LDproxy(CEU-1kg) | 1                       | rs1717017  | Parietal lobe (ScanDB)       | 2.54E-16     | 3   | 41890620 |             | ULK4       | cis                         |      |        |                  |                |
| rs7650227 | PP     | ULK4      | ULK4         | 4      | LDproxy(CEU-1kg) | 1                       | rs6796210  | Parietal lobe (ScanDB)       | 2.54E-16     | 3   | 41826722 |             | ULK4       | cis                         |      |        |                  |                |
| rs7650227 | PP     | ULK4      | ULK4         | 4      | LDproxy(CEU-1kg) | 1                       | rs6803652  | Parietal lobe (ScanDB)       | 2.54E-16     | 3   | 41799560 |             | ULK4       | cis                         |      |        |                  |                |
| rs7650227 | PP     | ULK4      | ULK4         | 4      | LDproxy(CEU-1kg) | 1                       | rs7648578  | Parietal lobe (ScanDB)       | 2.54E-16     | 3   | 41833735 |             | ULK4       | cis                         |      |        |                  |                |
| rs7650227 | PP     | ULK4      | ULK4         | 4      | LDproxy(CEU-1kg) | 1                       | rs9839399  | Parietal lobe (ScanDB)       | 2.54E-16     | 3   | 41903048 |             | ULK4       | cis                         |      |        |                  |                |
| rs7650227 | PP     | ULK1      | ULK1         | 1      | LDproxy(CEU-1kg) | 1                       | rs1016669  | Parietal lobe (ScanDB)       | 2.55E-16     | 3   | 41869444 |             | ULK1       | cis                         |      |        |                  |                |
| rs7650227 | PP     | ULK4      | ULK4         | 4      | LDproxy(CEU-1kg) | 1                       | rs2128834  | Parietal lobe (ScanDB)       | 2.55E-16     | 3   | 41837649 |             | ULK4       | cis                         |      |        |                  |                |
| rs7650227 | PP     | ULK4      | ULK4         | 4      | LDproxy(CEU-1kg) | 1                       | rs3774372  | Parietal lobe (ScanDB)       | 2.55E-16     | 3   | 41852418 |             | ULK4       | cis                         |      |        |                  |                |
| rs7650227 | PP     | ULK4      | ULK4         | 4      | LDproxy(CEU-1kg) | 1                       | rs6791806  | Parietal lobe (ScanDB)       | 2.55E-16     | 3   | 41864999 |             | ULK4       | cis                         |      |        |                  |                |
| rs7650227 | PP     | ULK4      | ULK4         | 4      | LDproxy(CEU-1kg) | 1                       | rs9873207  | Parietal lobe (ScanDB)       | 2.55E-16     | 3   | 41859754 |             | ULK4       | cis                         |      |        |                  |                |
| rs7650227 | PP     | ULK4      | ULK4         | 4      | LDproxy(CEU-1kg) | 1                       | rs9867627  | Parietal lobe (ScanDB)       | 2.73E-16     | 3   | 41770845 |             | ULK4       | cis                         |      |        |                  |                |
| rs7650227 | PP     | ULK4      | ULK4         | 4      | LDproxy(CEU-1kg) | 1                       | rs6599175  | Parietal lobe (ScanDB)       | 2.80E-16     | 3   | 41761013 |             | ULK4       | cis                         |      |        |                  |                |
| rs7650227 | PP     | ULK4      | ULK4         | 4      | LDproxy(CEU-1kg) | 1                       | rs9854833  | Parietal lobe (ScanDB)       | 4.38E-16     | 3   | 41750581 |             | ULK4       | cis                         |      |        |                  |                |
| rs7650227 | PP     | ULK4      | ULK4         | 4      | LDproxy(CEU-1kg) | 1                       | rs9854833  | Cerebellum (ScanDB)          | 8.69E-16     | 3   | 41750581 |             | ULK4       | cis                         |      |        |                  |                |
| rs7650227 | PP     | ULK4      | ULK4         | 4      | LDproxy(CEU-1kg) | 1                       | rs9874975  | Parietal lobe (ScanDB)       | 1.21E-15     | 3   | 41739304 |             | ULK4       | cis                         |      |        |                  |                |
| rs7650227 | PP     | ULK4      | ULK4         | 4      | LDproxy(CEU-1kg) | 1                       | rs6599175  | Cerebellum (ScanDB)          | 1.31E-15     | 3   | 41761013 |             | ULK4       | cis                         |      |        |                  |                |
| rs7650227 | PP     | ULK4      | ULK4         | 4      | LDproxy(CEU-1kg) | 1                       | rs1052501  | Visual cortex (Huntington's) | 1.39E-15     | 3   | 41900402 | 10025919071 | CTNNB1     | cis                         |      |        |                  |                |
| rs7650227 | PP     | ULK4      | ULK4         | 4      | LDproxy(CEU-1kg) | 1                       | rs9867627  | Cerebellum (ScanDB)          | 1.39E-15     | 3   | 41770845 |             | ULK4       | cis                         |      |        |                  |                |
| rs7650227 | PP     | ULK4      | ULK4         | 4      | LDproxy(CEU-1kg) | 1                       | rs3890604  | Parietal lobe (ScanDB)       | 1.52E-15     | 3   | 41735629 |             | ULK4       | cis                         |      |        |                  |                |
| rs7650227 | PP     | ULK4      | ULK4         | 4      | LDproxy(CEU-1kg) | 1                       | rs9825741  | Parietal lobe (ScanDB)       | 1.52E-15     | 3   | 41736832 |             | ULK4       | cis                         |      |        |                  |                |
| rs7650227 | PP     | ULK4      | ULK4         | 4      | LDproxy(CEU-1kg) | 1                       | rs9852303  | Parietal lobe (ScanDB)       | 1.52E-15     | 3   | 41734529 |             | ULK4       | cis                         |      |        |                  |                |
| rs7650227 | PP     | ULK4      | ULK4         | 4      | LDproxy(CEU-1kg) | 1                       | rs9847006  | Parietal lobe (ScanDB)       | 1.58E-15     | 3   | 41730363 |             | ULK4       | cis                         |      |        |                  |                |
| rs7650227 | PP     | ULK4      | ULK4         | 4      | LDproxy(CEU-1kg) | 1                       | rs1052501  | Cerebellum (ScanDB)          | 2.00E-15     | 3   | 41950394 |             | ULK4       | cis                         |      |        |                  |                |
| rs7650227 | PP     | ULK4      | ULK4         | 4      | LDproxy(CEU-1kg) | 1                       | rs13325965 | Cerebellum (ScanDB)          | 2.00E-15     | 3   | 41889946 |             | ULK4       | cis                         |      |        |                  |                |
| rs7650227 | PP     | ULK4      | ULK4         | 4      | LDproxy(CEU-1kg) | 1                       | rs1716685  | Cerebellum (ScanDB)          | 2.00E-15     | 3   | 41900305 |             | ULK4       | cis                         |      |        |                  |                |
| rs7650227 | PP     | ULK4      | ULK4         | 4      | LDproxy(CEU-1kg) | 1                       | rs1717000  | Cerebellum (ScanDB)          | 2.00E-15     | 3   | 41905223 |             | ULK4       | cis                         |      |        |                  |                |
| rs7650227 | PP     | ULK4      | ULK4         | 4      | LDproxy(CEU-1kg) | 1                       | rs1717006  | Cerebellum (ScanDB)          | 2.00E-15     | 3   | 41915452 |             | ULK4       | cis                         |      |        |                  |                |
| rs7650227 | PP     | ULK4      | ULK4         | 4      | LDproxy(CEU-1kg) | 1                       | rs1717017  | Cerebellum (ScanDB)          | 2.00E-15     | 3   | 41890620 |             | ULK4       | cis                         |      |        |                  |                |
| rs7650227 | PP     | ULK4      | ULK4         | 4      | LDproxy(CEU-1kg) | 1                       | rs2128834  | Cerebellum (ScanDB)          | 2.00E-15     | 3   | 41837649 |             | ULK4       | cis                         |      |        |                  |                |
| rs7650227 | PP     | ULK4      | ULK4         | 4      | LDproxy(CEU-1kg) | 1                       | rs6796210  | Cerebellum (ScanDB)          | 2.00E-15     | 3   | 41826722 |             | ULK4       | cis                         |      |        |                  |                |
| rs7650227 | PP     | ULK4      | ULK4         | 4      | LDproxy(CEU-1kg) | 1                       | rs7648578  | Cerebellum (ScanDB)          | 2.00E-15     | 3   | 41833735 |             | ULK4       | cis                         |      |        |                  |                |
| rs7650227 | PP     | ULK4      | ULK4         | 4      | LDproxy(CEU-1kg) | 1                       | rs9839399  | Cerebellum (ScanDB)          | 2.00E-15     | 3   | 41903048 |             | ULK4       | cis                         |      |        |                  |                |
| rs7650227 | PP     | ULK4      | ULK4         | 4      | LDproxy(CEU-1kg) | 1                       | rs1016669  | Cerebellum (ScanDB)          | 2.01E-15     | 3   | 41869444 |             | ULK4       | cis                         |      |        |                  |                |
| rs7650227 | PP     | ULK4      | ULK4         | 4      | LDproxy(CEU-1kg) | 1                       | rs3774372  | Cerebellum (ScanDB)          | 2.01E-15     | 3   | 41852418 |             | ULK4       | cis                         |      |        |                  |                |
| rs7650227 | PP     | ULK4      | ULK4         | 4      | LDproxy(CEU-1kg) | 1                       | rs6791806  | Cerebellum (ScanDB)          | 2.01E-15     | 3   | 41864999 |             | ULK4       | cis                         |      |        |                  |                |
| rs7650227 | PP     | ULK4      | ULK4         | 4      | LDproxy(CEU-1kg) | 1                       | rs9873207  | Cerebellum (ScanDB)          | 2.01E-15     | 3   | 41859754 |             | ULK4       | cis                         |      |        |                  |                |
| rs7650227 | PP     | ULK4      | ULK4         | 4      | LDproxy(CEU-1kg) | 1                       | rs10212536 | Cerebellum (ScanDB)          | 2.04E-15     | 3   | 41802030 |             | ULK4       | cis                         |      |        |                  |                |
| rs7650227 | PP     | ULK4      | ULK4         | 4      | LDproxy(CEU-1kg) | 1                       | rs6803652  | Cerebellum (ScanDB)          | 2.04E-15     | 3   | 41799560 |             | ULK4       | cis                         |      |        |                  |                |
| rs7650227 | PP     | ULK4      | ULK4         | 4      | LDproxy(CEU-1kg) | 1                       | rs17062109 | Cerebellum (ScanDB)          | 2.05E-15     | 3   | 41785368 |             | ULK4       | cis                         |      |        |                  |                |
| rs7650227 | PP     | ULK4      | ULK4         | 4      | LDproxy(CEU-1kg) | 1                       | rs9874975  | Cerebellum (ScanDB)          | 2.20E-15     | 3   | 41739304 |             | ULK4       | cis                         |      |        |                  |                |
| rs7650227 | PP     | ULK4      | ULK4         | 4      | LDproxy(CEU-1kg) | 1                       | rs9847006  | Cerebellum (ScanDB)          | 2.71E-15     | 3   | 41730363 |             | ULK4       | cis                         |      |        |                  |                |
| rs7650227 | PP     | ULK4      | ULK4         | 4      | LDproxy(CEU-1kg) | 1                       | rs3890604  | Cerebellum (ScanDB)          | 2.78E-15     | 3   | 41735629 |             | ULK4       | cis                         |      |        |                  |                |
| rs7650227 | PP     | ULK4      | ULK4         | 4      | LDproxy(CEU-1kg) | 1                       | rs9852303  | Cerebellum (ScanDB)          | 2.78E-15     | 3   | 41734529 |             | ULK4       | cis                         |      |        |                  |                |
| rs7650227 | PP     | ULK4      | ULK4         | 4      | LDproxy(CEU-1kg) | 1                       | rs9825741  | Cerebellum (ScanDB)          | 2.79E-15     | 3   | 41736832 |             | ULK4       | cis                         |      |        |                  |                |
| rs7650227 | PP     | ULK4      | ULK4         | 4      | LDproxy(CEU-1kg) | 1                       | rs1716642  | Cerebellum (ScanDB)          | 2.97E-15     | 3   | 41940869 |             | ULK4       | cis                         |      |        |                  |                |
| rs7650227 | PP     | ULK4      | ULK4         | 4      | LDproxy(CEU-1kg) | 1                       | rs3934103  | Cerebellum (ScanDB)          | 3.44E-15     | 3   | 41952218 |             | ULK4       | cis                         |      |        |                  |                |
| rs7650227 | PP     | ULK4      | ULK4         | 4      | LDproxy(CEU-1kg) | 1                       | rs1717020  | Cerebellum (ScanDB)          | 5.61E-15     | 3   | 41956494 |             | ULK4       | cis                         |      |        |                  |                |

| IndexSNP  | Traits | InRefGene | RefGenes60kb | Locus# | Index/LD status   | r <sup>2</sup> to index | eSNPid     | Tissue                                   | eSNP P value | Chr | B36pos   | ArrayID          | Transcript | type of eQTL (cis or trans) | Beta | Allele | Probe Chromosome | Probe Position |
|-----------|--------|-----------|--------------|--------|-------------------|-------------------------|------------|------------------------------------------|--------------|-----|----------|------------------|------------|-----------------------------|------|--------|------------------|----------------|
| rs7650227 | PP     | ULK4      | ULK4         | 4      | LDproxy(CEU-1kg)  | 1                       | rs1717024  | Cerebellum (ScanDB)                      | 5.61E-15     | 3   | 41959892 |                  | ULK4       | cis                         |      |        |                  |                |
| rs7650227 | PP     | ULK4      | ULK4         | 4      | LDproxy(CEU-1kg)  | 1                       | rs2272007  | Cerebellum (ScanDB)                      | 5.61E-15     | 3   | 41971140 |                  | ULK4       | cis                         |      |        |                  |                |
| rs7650227 | PP     | ULK4      | ULK4         | 4      | LDproxy(CEU-1kg)  | 1                       | rs9856633  | Cerebellum (ScanDB)                      | 5.61E-15     | 3   | 41988854 |                  | ULK4       | cis                         |      |        |                  |                |
| rs7650227 | PP     | ULK4      | ULK4         | 4      | LDproxy(CEU-1kg)  | 1                       | rs7648578  | PerIPHERAL artery plaque                 | 9.06E-14     | 3   | 41833735 | 100160459_TGI_   | ULK4       | cis                         |      |        |                  |                |
| rs7650227 | PP     | ULK4      | ULK4         | 4      | LDproxy(CEU-1kg)  | 1                       | rs6803652  | Lung                                     | 9.75E-14     | 3   | 41799560 | 100149945_TGI_   | ULK4       | trans                       |      |        |                  |                |
| rs7650227 | PP     | ULK4      | ULK4         | 4      | LDproxy(CEU-1kg)  | 1                       | rs3934103  | Visual cortex (all samples)              | 4.32E-13     | 3   | 41952218 | 10023809218      | ULK4       | cis                         |      |        |                  |                |
| rs7650227 | PP     | ULK4      | ULK4         | 4      | LDproxy(CEU-1kg)  | 1                       | rs2272007  | Liver (ScanDB)                           | 5.57E-13     | 3   | 41971140 |                  | ULK4       | cis                         |      |        |                  |                |
| rs7650227 | PP     | ULK4      | ULK4         | 4      | LDproxy(CEU-1kg)  | 1                       | rs1052501  | Liver (ScanDB)                           | 6.22E-13     | 3   | 41975390 |                  | ULK4       | cis                         |      |        |                  |                |
| rs7650227 | PP     | ULK4      | ULK4         | 4      | LDproxy(CEU-1kg)  | 1                       | rs9852303  | Liver (ScanDB)                           | 7.34E-13     | 3   | 41734529 |                  | ULK4       | cis                         |      |        |                  |                |
| rs7650227 | PP     | ULK4      | ULK4         | 4      | LDproxy(CEU-1kg)  | 1                       | rs6599175  | Liver (ScanDB)                           | 9.19E-13     | 3   | 41761013 |                  | ULK4       | cis                         |      |        |                  |                |
| rs7650227 | PP     | ULK4      | ULK4         | 4      | LDproxy(CEU-1kg)  | 1                       | rs3934103  | Liver (ScanDB)                           | 9.88E-13     | 3   | 41952218 |                  | ULK4       | cis                         |      |        |                  |                |
| rs7650227 | PP     | ULK4      | ULK4         | 4      | LDproxy(CEU-Rel2) | 1                       | rs1716975  | Liver (ScanDB)                           | 1.47E-12     | 3   | 41935010 |                  | ULK4       | cis                         |      |        |                  |                |
| rs7650227 | PP     | ULK4      | ULK4         | 4      | LDproxy(CEU-1kg)  | 1                       | rs1717017  | Liver (ScanDB)                           | 3.08E-12     | 3   | 41890620 |                  | ULK4       | cis                         |      |        |                  |                |
| rs7650227 | PP     | ULK4      | ULK4         | 4      | LDproxy(CEU-1kg)  | 1                       | rs6796210  | Liver (ScanDB)                           | 3.08E-12     | 3   | 41826722 |                  | ULK4       | cis                         |      |        |                  |                |
| rs7650227 | PP     | ULK4      | ULK4         | 4      | LDproxy(CEU-1kg)  | 1                       | rs9825741  | Peripheral artery plaque                 | 3.91E-12     | 3   | 41736832 | 100149945_TGI_   | ULK4       | cis                         |      |        |                  |                |
| rs7650227 | PP     | ULK4      | ULK4         | 4      | LDproxy(CEU-1kg)  | 1                       | rs6599179  | Liver (ScanDB)                           | 4.02E-12     | 3   | 41830288 |                  | ULK4       | cis                         |      |        |                  |                |
| rs7650227 | PP     | ULK4      | ULK4         | 4      | LDproxy(CEU-1kg)  | 1                       | rs1052501  | Liver (Greenawalt)                       | 7.81E-12     | 3   | 41900402 | 10023809218      | ULK4       | cis                         |      |        |                  |                |
| rs7650227 | PP     | ULK4      | ULK4         | 4      | LDproxy(CEU-1kg)  | 1                       | rs1717020  | Hippocampus (CA1, n=61; Kim et al.)      | 1.06E-11     | 3   | 41981490 | 232206_at        | ULK4       | cis                         | 0.00 |        |                  |                |
| rs7650227 | PP     | ULK4      | ULK4         | 4      | LDproxy(CEU-1kg)  | 1                       | rs9874975  | Liver (ScanDB)                           | 1.24E-11     | 3   | 41739304 |                  | ULK4       | cis                         |      |        |                  |                |
| rs7650227 | PP     | ULK4      | ULK4         | 4      | LDproxy(CEU-1kg)  | 1                       | rs6803652  | Liver (ScanDB)                           | 1.25E-11     | 3   | 41799560 |                  | ULK4       | cis                         |      |        |                  |                |
| rs7650227 | PP     | ULK4      | ULK4         | 4      | LDproxy(CEU-1kg)  | 1                       | rs9856633  | ER+ breast tumor cells                   | 1.31E-11     | 3   | 41988854 |                  | ULK4       | cis                         |      |        |                  |                |
| rs7650227 | PP     | ULK4      | ULK4         | 4      | LDproxy(CEU-Rel2) | 1                       | rs1716975  | Normal dendritic cells (before Mycobacte | 1.77E-11     | 3   | 41935010 |                  | ULK4       | cis                         |      |        |                  |                |
| rs7650227 | PP     | ULK4      | ULK4         | 4      | LDproxy(CEU-1kg)  | 1                       | rs3774372  | ER+ breast tumor cells                   | 1.95E-11     | 3   | 41852418 |                  | ULK4       | cis                         |      |        |                  |                |
| rs7650227 | PP     | ULK4      | ULK4         | 4      | LDproxy(CEU-1kg)  | 1                       | rs1716685  | ER+ breast tumor cells                   | 2.66E-11     | 3   | 41900305 |                  | ULK4       | cis                         |      |        |                  |                |
| rs7650227 | PP     | ULK4      | ULK4         | 4      | LDproxy(CEU-1kg)  | 1                       | rs1717006  | ER+ breast tumor cells                   | 2.66E-11     | 3   | 41915452 |                  | ULK4       | cis                         |      |        |                  |                |
| rs7650227 | PP     | ULK4      | ULK4         | 4      | LDproxy(CEU-1kg)  | 1                       | rs1717020  | ER+ breast tumor cells                   | 2.66E-11     | 3   | 41956494 |                  | ULK4       | cis                         |      |        |                  |                |
| rs7650227 | PP     | ULK4      | ULK4         | 4      | LDproxy(CEU-1kg)  | 1                       | rs2272007  | ER+ breast tumor cells                   | 2.66E-11     | 3   | 41971140 |                  | ULK4       | cis                         |      |        |                  |                |
| rs7650227 | PP     | ULK4      | ULK4         | 4      | LDproxy(CEU-1kg)  | 1                       | rs7648578  | ER+ breast tumor cells                   | 2.66E-11     | 3   | 41833735 |                  | ULK4       | cis                         |      |        |                  |                |
| rs7650227 | PP     | ULK4      | ULK4         | 4      | LDproxy(CEU-1kg)  | 1                       | rs1717024  | ER+ breast tumor cells                   | 2.87E-11     | 3   | 41959892 |                  | ULK4       | cis                         |      |        |                  |                |
| rs7650227 | PP     | ULK4      | ULK4         | 4      | LDproxy(CEU-1kg)  | 1                       | rs6796210  | RNAseq(HapMapLCL)+DeepSage(blood)        | 4.77E-11     | 3   | 41851718 | ENST0000030183   | ULK4       | cis                         |      |        |                  |                |
| rs7650227 | PP     | ULK4      | ULK4         | 4      | LDproxy(CEU-1kg)  | 1                       | rs13325965 | ER+ breast tumor cells                   | 5.17E-11     | 3   | 41889946 |                  | ULK4       | cis                         |      |        |                  |                |
| rs7650227 | PP     | ULK4      | ULK4         | 4      | LDproxy(CEU-1kg)  | 1                       | rs9856088  | Liver (ScanDB)                           | 5.62E-11     | 3   | 41835486 |                  | ULK4       | cis                         |      |        |                  |                |
| rs7650227 | PP     | ULK4      | ULK4         | 4      | LDproxy(CEU-1kg)  | 1                       | rs1717020  | BcellsTransformed_HapMapCEU              | 5.99E-11     | 3   | 41956494 | 2670619 in 26704 | ULK4       | cis                         |      |        |                  |                |
| rs7650227 | PP     | ULK4      | ULK4         | 4      | LDproxy(CEU-1kg)  | 1                       | rs2128834  | ER+ breast tumor cells                   | 9.91E-11     | 3   | 41837649 |                  | ULK4       | cis                         |      |        |                  |                |
| rs7650227 | PP     | ULK4      | ULK4         | 4      | LDproxy(CEU-1kg)  | 1                       | rs10212536 | Liver (ScanDB)                           | 1.02E-10     | 3   | 41802030 |                  | ULK4       | cis                         |      |        |                  |                |
| rs7650227 | PP     | ULK4      | ULK4         | 4      | LDproxy(CEU-1kg)  | 1                       | rs17062109 | ER+ breast tumor cells                   | 1.09E-10     | 3   | 41785368 |                  | ULK4       | cis                         |      |        |                  |                |
| rs7650227 | PP     | ULK4      | ULK4         | 4      | LDproxy(CEU-1kg)  | 1                       | rs9867627  | ER+ breast tumor cells                   | 1.15E-10     | 3   | 41770845 |                  | ULK4       | cis                         |      |        |                  |                |
| rs7650227 | PP     | ULK4      | ULK4         | 4      | LDproxy(CEU-1kg)  | 1                       | rs1717000  | Liver (ScanDB)                           | 3.48E-10     | 3   | 41905223 |                  | ULK4       | cis                         |      |        |                  |                |
| rs7650227 | PP     | ULK4      | ULK4         | 4      | LDproxy(CEU-1kg)  | 1                       | rs9842261  | ER+ breast tumor cells                   | 3.95E-10     | 3   | 41797112 |                  | ULK4       | cis                         |      |        |                  |                |
| rs7650227 | PP     | ULK4      | ULK4         | 4      | LDproxy(CEU-1kg)  | 1                       | rs6599175  | ER+ breast tumor cells                   | 7.44E-10     | 3   | 41761013 |                  | ULK4       | cis                         |      |        |                  |                |
| rs7650227 | PP     | ULK4      | ULK4         | 4      | LDproxy(CEU-1kg)  | 1                       | rs6599176  | ER+ breast tumor cells                   | 7.44E-10     | 3   | 41763496 |                  | ULK4       | cis                         |      |        |                  |                |
| rs7650227 | PP     | ULK4      | ULK4         | 4      | LDproxy(CEU-1kg)  | 1                       | rs9825741  | ER+ breast tumor cells                   | 7.44E-10     | 3   | 41736832 |                  | ULK4       | cis                         |      |        |                  |                |
| rs7650227 | PP     | ULK4      | ULK4         | 4      | LDproxy(CEU-1kg)  | 1                       | rs9867627  | Liver (ScanDB)                           | 9.63E-10     | 3   | 41770845 |                  | ULK4       | cis                         |      |        |                  |                |
| rs7650227 | PP     | ULK4      | ULK4         | 4      | LDproxy(CEU-1kg)  | 1                       | rs9873207  | Liver (ScanDB)                           | 6.65E-09     | 3   | 41859754 |                  | ULK4       | cis                         |      |        |                  |                |
| rs7650227 | PP     | ULK4      | ULK4         | 4      | LDproxy(CEU-1kg)  | 1                       | rs10212536 | Prefrontal cortex (Alzheimer's)          | 7.60E-09     | 3   | 41802030 | 10023809218      | ULK4       | cis                         |      |        |                  |                |
| rs7650227 | PP     | ULK4      | ULK4         | 4      | LDproxy(CEU-1kg)  | 1                       | rs2272007  | LCL                                      | 2.70E-08     | 3   | 41971140 | 231149_s_at      | ULK4       | cis                         |      |        |                  |                |
| rs7650227 | PP     | ULK4      | ULK4         | 4      | LDproxy(CEU-1kg)  | 1                       | rs1052501  | LCL                                      | 3.90E-08     | 3   | 41900402 | 231149_s_at      | ULK4       | cis                         |      |        |                  |                |
| rs7650227 | PP     | ULK4      | ULK4         | 4      | LDproxy(CEU-1kg)  | 1                       | rs1994157  | Liver (ScanDB)                           | 4.07E-08     | 3   | 41872486 |                  | ULK4       | cis                         |      |        |                  |                |
| rs7650227 | PP     | ULK4      | ULK4         | 4      | LDproxy(CEU-Rel2) | 1                       | rs1716975  | LCL                                      | 7.90E-08     | 3   | 41935010 | 231149_s_at      | ULK4       | cis                         |      |        |                  |                |
| rs7650227 | PP     | ULK4      | ULK4         | 4      | LDproxy(CEU-1kg)  | 1                       | rs10212536 | Cerebellum (Huntington's)                | 9.93E-07     | 3   | 41802030 | 10025919071      | CTNNB1     | cis                         |      |        |                  |                |
| rs7650227 | PP     | ULK4      | ULK4         | 4      | LDproxy(CEU-1kg)  | 1                       | rs9852303  | Cerebellum (normal samples)              | 1.1088E-05   | 3   | 41734529 | 10025919071      | CTNNB1     | cis                         |      |        |                  |                |
| rs7650227 | PP     | ULK4      | ULK4         | 4      | LDproxy(CEU-1kg)  | 1                       | rs1125203  | Intestine (normal ileum)                 | 2.98E-05     | 3   | 41760895 |                  | ULK4       | cis                         |      |        |                  |                |
| rs7650227 | PP     | ULK4      | ULK4         | 4      | LDproxy(CEU-1kg)  | 1                       | rs6599175  | Intestine (normal ileum)                 | 2.98E-05     | 3   | 41786009 |                  | ULK4       | cis                         |      |        |                  |                |
| rs7650227 | PP     | ULK4      | ULK4         | 4      | LDproxy(CEU-1kg)  | 1                       | rs9874975  | Intestine (normal ileum)                 | 2.98E-05     | 3   | 41764300 |                  | ULK4       | cis                         |      |        |                  |                |
| rs7650227 | PP     | ULK4      | ULK4         | 4      | LDproxy(CEU-1kg)  | 1                       | rs7632387  | Intestine (normal ileum)                 | 3.61E-05     | 3   | 41853161 |                  | ULK4       | cis                         |      |        |                  |                |
| rs7650227 | PP     | ULK4      | ULK4         | 4      | LDproxy(CEU-1kg)  | 1                       | rs1052501  | Prefrontal cortex (Huntington's)         | 3.85E-05     | 3   | 41900402 | 10023809218      | ULK4       | cis                         |      |        |                  |                |
| rs7650227 | PP     | ULK4      | ULK4         | 4      | LDproxy(CEU-1kg)  | 1                       | rs1052501  | Intestine (normal ileum)                 | 4.60E-05     | 3   | 41925398 |                  | ULK4       | cis                         |      |        |                  |                |
| rs7650227 | PP     | ULK4      | ULK4         | 4      | LDproxy(CEU-1kg)  | 1                       | rs1717000  | Intestine (normal ileum)                 | 4.60E-05     | 3   | 41930219 |                  | ULK4       | cis                         |      |        |                  |                |
| rs7650227 | PP     | ULK4      | ULK4         | 4      | LDproxy(CEU-1kg)  | 1                       | rs6599179  | Intestine (normal ileum)                 | 4.60E-05     | 3   | 41855284 |                  | ULK4       | cis                         |      |        |                  |                |

| IndexSNP  | Traits | InRefGene | RefGenes60kb | Locus# | Index/LD status   | r <sup>2</sup> to index | eSNPid     | Tissue                             | eSNP P value     | Chr | B36pos   | ArrayID         | Transcript    | type of eQTL (cis or trans) | Beta | Allele | Probe Chromosome | Probe Position |
|-----------|--------|-----------|--------------|--------|-------------------|-------------------------|------------|------------------------------------|------------------|-----|----------|-----------------|---------------|-----------------------------|------|--------|------------------|----------------|
| rs7650227 | PP     | ULK4      | ULK4         | 4      | LDproxy(CEU-1kg)  | 1                       | rs6796210  | Intestine (normal ileum)           | 4.60E-05         | 3   | 41851718 |                 | ULK4          | cis                         |      |        |                  |                |
| rs7650227 | PP     | ULK4      | ULK4         | 4      | LDproxy(CEU-1kg)  | 1                       | rs9857175  | Intestine (normal ileum)           | 4.60E-05         | 3   | 41822054 |                 | ULK4          | cis                         |      |        |                  |                |
| rs7650227 | PP     | ULK4      | ULK4         | 4      | LDproxy(CEU-1kg)  | 1                       | rs1994157  | Intestine (normal ileum)           | 5.68E-05         | 3   | 41897482 |                 | ULK4          | cis                         |      |        |                  |                |
| rs7650227 | PP     | ULK4      | ULK4         | 4      | LDproxy(CEU-1kg)  | 1                       | rs9852303  | Visual cortex (all samples)        | 5.95E-05         | 3   | 41734529 | 10023829862     | ULK4          | cis                         |      |        | AK022066         |                |
| rs7650227 | PP     | ULK4      | ULK4         | 4      | LDproxy(CEU-1kg)  | 1                       | rs1615243  | Intestine (normal ileum)           | 6.89E-05         | 3   | 41965234 |                 | ULK4          | cis                         |      |        |                  |                |
| rs7650227 | PP     | ULK4      | ULK4         | 4      | LDproxy(CEU-1kg)  | 1                       | rs1716984  | Intestine (normal ileum)           | 6.89E-05         | 3   | 41965532 |                 | ULK4          | cis                         |      |        |                  |                |
| rs7650227 | PP     | ULK4      | ULK4         | 4      | LDproxy(CEU-1kg)  | 1                       | rs2272007  | Intestine (normal ileum)           | 6.89E-05         | 3   | 41996136 |                 | ULK4          | cis                         |      |        |                  |                |
| rs7650227 | PP     | ULK4      | ULK4         | 4      | LDproxy(CEU-1kg)  | 1                       | rs2128835  | Intestine (normal ileum)           | 7.22E-05         | 3   | 41862873 |                 | ULK4          | cis                         |      |        |                  |                |
| rs7650227 | PP     | ULK4      | ULK4         | 4      | LDproxy(CEU-Rel2) | 1                       | rs1716975  | Prefrontal cortex (normal samples) | 1.83E-03         | 3   | 41935010 | 10023809218     | ULK4          | cis                         |      |        |                  |                |
| rs7650227 | PP     | ULK4      | ULK4         | 4      | LDproxy(CEU-1kg)  | 1                       | rs9847006  | Lung                               | <2E-16           | 3   | 41730363 | 100125684_TGI_ε | Unknown       | cis                         |      |        |                  |                |
| rs7650227 | PP     | ULK4      | ULK4         | 4      | LDproxy(CEU-1kg)  | 1                       | rs10212536 | omental                            | 6.93E-17;4.7E-17 | 3   | 41802030 | 10023809218;100 | ULK4;AK022066 | cis                         |      |        |                  |                |
| rs7650227 | PP     | ULK4      | ULK4         | 4      | LDproxy(CEU-Rel2) | 0.953                   | rs6599167  | Visual cortex (Alzheimer's)        | 3.11E-08         | 3   | 41725264 | 10023809218     | ULK4          | cis                         |      |        |                  |                |
| rs7650227 | PP     | ULK4      | ULK4         | 4      | LDproxy(CEU-Rel2) | 0.861                   | rs10510731 | Lung                               | 1.40E-14         | 3   | 41828314 | 100160459_TGI_ε | ULK4          | cis                         |      |        |                  |                |
| rs7650227 | PP     | ULK4      | ULK4         | 4      | LDproxy(CEU-Rel2) | 0.861                   | rs4299460  | Lung                               | 1.47E-14         | 3   | 41927449 | 100311290_TGI_ε | ULK4          | cis                         |      |        |                  |                |
| rs7650227 | PP     | ULK4      | ULK4         | 4      | LDproxy(CEU-Rel2) | 0.861                   | rs17214945 | ER+ breast tumor cells             | 2.69E-11         | 3   | 41783664 |                 | ULK4          | cis                         |      |        |                  |                |
| rs7650227 | PP     | ULK4      | ULK4         | 4      | LDproxy(CEU-Rel2) | 0.861                   | rs17214987 | ER+ breast tumor cells             | 2.69E-11         | 3   | 41785485 |                 | ULK4          | cis                         |      |        |                  |                |
| rs7650227 | PP     | ULK4      | ULK4         | 4      | LDproxy(CEU-Rel2) | 0.861                   | rs17218264 | ER+ breast tumor cells             | 2.69E-11         | 3   | 41950851 |                 | ULK4          | cis                         |      |        |                  |                |
| rs7650227 | PP     | ULK1      | ULK1         | 1      | LDproxy(CEU-Rel2) | 0.861                   | rs17283929 | ER+ breast tumor cells             | 2.69E-11         | 3   | 41916902 |                 | ULK1          | cis                         |      |        |                  |                |
| rs7650227 | PP     | ULK4      | ULK4         | 4      | LDproxy(CEU-Rel2) | 0.861                   | rs17218103 | Liver (ScanDB)                     | 5.14E-11         | 3   | 41918728 |                 | ULK4          | cis                         |      |        |                  |                |
| rs7650227 | PP     | ULK4      | ULK4         | 4      | LDproxy(CEU-Rel2) | 0.861                   | rs17218264 | Parietal lobe (ScanDB)             | 7.13E-11         | 3   | 41950851 |                 | ULK4          | cis                         |      |        |                  |                |
| rs7650227 | PP     | ULK4      | ULK4         | 4      | LDproxy(CEU-Rel2) | 0.861                   | rs17215183 | Parietal lobe (ScanDB)             | 1.21E-10         | 3   | 41787338 |                 | ULK4          | cis                         |      |        |                  |                |
| rs7650227 | PP     | ULK4      | ULK4         | 4      | LDproxy(CEU-Rel2) | 0.861                   | rs17214945 | Parietal lobe (ScanDB)             | 1.24E-10         | 3   | 41783664 |                 | ULK4          | cis                         |      |        |                  |                |
| rs7650227 | PP     | ULK4      | ULK4         | 4      | LDproxy(CEU-Rel2) | 0.861                   | rs17215589 | Parietal lobe (ScanDB)             | 1.27E-10         | 3   | 41806207 |                 | ULK4          | cis                         |      |        |                  |                |
| rs7650227 | PP     | ULK4      | ULK4         | 4      | LDproxy(CEU-Rel2) | 0.861                   | rs17218103 | Parietal lobe (ScanDB)             | 1.36E-10         | 3   | 41918728 |                 | ULK4          | cis                         |      |        |                  |                |
| rs7650227 | PP     | ULK4      | ULK4         | 4      | LDproxy(CEU-Rel2) | 0.861                   | rs17214945 | Cerebellum (ScanDB)                | 3.47E-10         | 3   | 41783664 |                 | ULK4          | cis                         |      |        |                  |                |
| rs7650227 | PP     | ULK4      | ULK4         | 4      | LDproxy(CEU-Rel2) | 0.861                   | rs17283677 | ER+ breast tumor cells             | 3.55E-10         | 3   | 41901152 |                 | ULK4          | cis                         |      |        |                  |                |
| rs7650227 | PP     | ULK4      | ULK4         | 4      | LDproxy(CEU-Rel2) | 0.861                   | rs17215183 | Cerebellum (ScanDB)                | 4.01E-10         | 3   | 41787338 |                 | ULK4          | cis                         |      |        |                  |                |
| rs7650227 | PP     | ULK4      | ULK4         | 4      | LDproxy(CEU-Rel2) | 0.861                   | rs17215589 | Cerebellum (ScanDB)                | 4.05E-10         | 3   | 41806207 |                 | ULK4          | cis                         |      |        |                  |                |
| rs7650227 | PP     | ULK4      | ULK4         | 4      | LDproxy(CEU-Rel2) | 0.861                   | rs17218103 | Cerebellum (ScanDB)                | 4.20E-10         | 3   | 41918728 |                 | ULK4          | cis                         |      |        |                  |                |
| rs7650227 | PP     | ULK4      | ULK4         | 4      | LDproxy(CEU-Rel2) | 0.861                   | rs17218264 | Cerebellum (ScanDB)                | 4.54E-10         | 3   | 41950851 |                 | ULK4          | cis                         |      |        |                  |                |
| rs7650227 | PP     | ULK4      | ULK4         | 4      | LDproxy(CEU-Rel2) | 0.861                   | rs10510731 | Liver (ScanDB)                     | 4.74E-10         | 3   | 41828314 |                 | ULK4          | cis                         |      |        |                  |                |
| rs7650227 | PP     | ULK4      | ULK4         | 4      | LDproxy(CEU-1kg)  | 0.857                   | rs794894   | Parietal lobe (ScanDB)             | 1.63E-16         | 3   | 42007487 |                 | ULK4          | cis                         |      |        |                  |                |
| rs7650227 | PP     | ULK4      | ULK4         | 4      | LDproxy(CEU-1kg)  | 0.857                   | rs7634985  | Parietal lobe (ScanDB)             | 1.73E-16         | 3   | 41994569 |                 | ULK4          | cis                         |      |        |                  |                |
| rs7650227 | PP     | ULK4      | ULK4         | 4      | LDproxy(CEU-1kg)  | 0.857                   | rs13087502 | Parietal lobe (ScanDB)             | 1.78E-16         | 3   | 41990114 |                 | ULK4          | cis                         |      |        |                  |                |
| rs7650227 | PP     | ULK4      | ULK4         | 4      | LDproxy(CEU-1kg)  | 0.857                   | rs794894   | Cerebellum (ScanDB)                | 1.45E-13         | 3   | 42007487 |                 | ULK4          | cis                         |      |        |                  |                |
| rs7650227 | PP     | ULK4      | ULK4         | 4      | LDproxy(CEU-1kg)  | 0.857                   | rs7634985  | Cerebellum (ScanDB)                | 1.56E-13         | 3   | 41994569 |                 | ULK4          | cis                         |      |        |                  |                |
| rs7650227 | PP     | ULK4      | ULK4         | 4      | LDproxy(CEU-1kg)  | 0.857                   | rs13087502 | Cerebellum (ScanDB)                | 1.61E-13         | 3   | 41990114 |                 | ULK4          | cis                         |      |        |                  |                |
| rs7650227 | PP     | ULK4      | ULK4         | 4      | LDproxy(CEU-1kg)  | 0.857                   | rs13087502 | ER+ breast tumor cells             | 1.55E-10         | 3   | 41990114 |                 | ULK4          | cis                         |      |        |                  |                |
| rs7650227 | PP     | ULK4      | ULK4         | 4      | LDproxy(CEU-1kg)  | 0.812                   | rs809930   | Parietal lobe (ScanDB)             | 5.10E-15         | 3   | 42040009 |                 | ULK4          | cis                         |      |        |                  |                |
| rs7650227 | PP     | ULK4      | ULK4         | 4      | LDproxy(CEU-1kg)  | 0.812                   | rs7652506  | Parietal lobe (ScanDB)             | 6.85E-15         | 3   | 42035239 |                 | ULK4          | cis                         |      |        |                  |                |
| rs7650227 | PP     | ULK4      | ULK4         | 4      | LDproxy(CEU-1kg)  | 0.812                   | rs939561   | Parietal lobe (ScanDB)             | 7.69E-15         | 3   | 42032105 |                 | ULK4          | cis                         |      |        |                  |                |
| rs7650227 | PP     | ULK4      | ULK4         | 4      | LDproxy(CEU-1kg)  | 0.812                   | rs7629767  | Parietal lobe (ScanDB)             | 7.83E-15         | 3   | 42018513 |                 | ULK4          | cis                         |      |        |                  |                |
| rs7650227 | PP     | ULK4      | ULK4         | 4      | LDproxy(CEU-1kg)  | 0.812                   | rs10510732 | SubCutAdipose(Greenawalt)          | 1.06E-14         | 3   | 41982343 | 10023809218     | ULK4          | cis                         |      |        |                  |                |
| rs7650227 | PP     | ULK4      | ULK4         | 4      | LDproxy(CEU-1kg)  | 0.812                   | rs939561   | Cerebellum (ScanDB)                | 5.72E-12         | 3   | 42032105 |                 | ULK4          | cis                         |      |        |                  |                |
| rs7650227 | PP     | ULK4      | ULK4         | 4      | LDproxy(CEU-1kg)  | 0.812                   | rs7629767  | Cerebellum (ScanDB)                | 6.08E-12         | 3   | 42018513 |                 | ULK4          | cis                         |      |        |                  |                |
| rs7650227 | PP     | ULK4      | ULK4         | 4      | LDproxy(CEU-1kg)  | 0.812                   | rs809930   | Cerebellum (ScanDB)                | 6.19E-12         | 3   | 42040009 |                 | ULK4          | cis                         |      |        |                  |                |
| rs7650227 | PP     | ULK4      | ULK4         | 4      | LDproxy(CEU-1kg)  | 0.812                   | rs7652506  | Cerebellum (ScanDB)                | 7.19E-12         | 3   | 42035239 |                 | ULK4          | cis                         |      |        |                  |                |
| rs7650227 | PP     | ULK4      | ULK4         | 4      | LDproxy(CEU-1kg)  | 0.812                   | rs7652506  | ER+ breast tumor cells             | 1.07E-11         | 3   | 42035239 |                 | ULK4          | cis                         |      |        |                  |                |
| rs7650227 | PP     | ULK4      | ULK4         | 4      | LDproxy(CEU-1kg)  | 0.812                   | rs10510732 | ER+ breast tumor cells             | 2.69E-11         | 3   | 41982343 |                 | ULK4          | cis                         |      |        |                  |                |
| rs7650227 | PP     | ULK4      | ULK4         | 4      | LDproxy(CEU-1kg)  | 0.812                   | rs17284313 | ER+ breast tumor cells             | 2.69E-11         | 3   | 41961791 |                 | ULK4          | cis                         |      |        |                  |                |
| rs7650227 | PP     | ULK4      | ULK4         | 4      | LDproxy(CEU-1kg)  | 0.812                   | rs17284472 | ER+ breast tumor cells             | 2.69E-11         | 3   | 41971308 |                 | ULK4          | cis                         |      |        |                  |                |
| rs7650227 | PP     | ULK4      | ULK4         | 4      | LDproxy(CEU-1kg)  | 0.812                   | rs17284313 | Parietal lobe (ScanDB)             | 7.62E-11         | 3   | 41961791 |                 | ULK4          | cis                         |      |        |                  |                |
| rs7650227 | PP     | ULK4      | ULK4         | 4      | LDproxy(CEU-1kg)  | 0.812                   | rs10510732 | Parietal lobe (ScanDB)             | 7.64E-11         | 3   | 41982343 |                 | ULK4          | cis                         |      |        |                  |                |
| rs7650227 | PP     | ULK4      | ULK4         | 4      | LDproxy(CEU-1kg)  | 0.812                   | rs17284472 | Parietal lobe (ScanDB)             | 7.64E-11         | 3   | 41971308 |                 | ULK4          | cis                         |      |        |                  |                |
| rs7650227 | PP     | ULK4      | ULK4         | 4      | LDproxy(CEU-1kg)  | 0.812                   | rs809930   | ER+ breast tumor cells             | 9.77E-11         | 3   | 42040009 |                 | ULK4          | cis                         |      |        |                  |                |
| rs7650227 | PP     | ULK4      | ULK4         | 4      | LDproxy(CEU-1kg)  | 0.812                   | rs10510732 | Liver (ScanDB)                     | 1.11E-10         | 3   | 41982343 |                 | ULK4          | cis                         |      |        |                  |                |
| rs7650227 | PP     | ULK4      | ULK4         | 4      | LDproxy(CEU-1kg)  | 0.812                   | rs17284313 | Cerebellum (ScanDB)                | 4.41E-10         | 3   | 41961791 |                 | ULK4          | cis                         |      |        |                  |                |
| rs7650227 | PP     | ULK4      | ULK4         | 4      | LDproxy(CEU-1kg)  | 0.812                   | rs10510732 | Cerebellum (ScanDB)                | 4.42E-10         | 3   | 41982343 |                 | ULK4          | cis                         |      |        |                  |                |
| rs7650227 | PP     | ULK4      | ULK4         | 4      | LDproxy(CEU-1kg)  | 0.812                   | rs17284472 | Cerebellum (ScanDB)                | 4.42E-10         | 3   | 41971308 |                 | ULK4          | cis                         |      |        |                  |                |



| IndexSNP   | Traits | InRefGene | RefGenes60kb                                | Locus# | Index/LD status   | r <sup>2</sup> to index | eSNPid     | Tissue                                   | eSNP P value     | Chr | B36pos   | ArrayID               | Transcript         | type of eQTL (cis or trans) | Beta  | Allele | Probe Chromosome | Probe Position |
|------------|--------|-----------|---------------------------------------------|--------|-------------------|-------------------------|------------|------------------------------------------|------------------|-----|----------|-----------------------|--------------------|-----------------------------|-------|--------|------------------|----------------|
| rs7650227  | PP     | ULK4      | ULK4                                        | 4      | LDproxy(CEU-1kg)  | 0.812                   | rs10510732 | Stomach                                  | 8.32E-10         | 3   | 41982343 | 100311290             | ULK4               | cis                         |       |        |                  |                |
| rs7650227  | PP     | ULK4      | ULK4                                        | 4      | LDproxy(CEU-1kg)  | 0.812                   | rs10510732 | Cerebellum (Alzheimer's)                 | 5.26E-02         | 3   | 41982343 | 10023829862           | AK022066           | cis                         |       |        |                  |                |
| rs7650227  | PP     | ULK4      | ULK4                                        | 4      | LDproxy(CEU-1kg)  | 0.762                   | rs794899   | LCL                                      | 1.30E-07         | 3   | 42003726 | 231149_s_at           | ULK4               | cis                         |       |        |                  |                |
| rs7650227  | PP     | ULK4      | ULK4                                        | 4      | LDproxy(CEU-1kg)  | 0.761                   | rs12635286 | Parietal lobe (ScanDB)                   | 7.75E-15         | 3   | 42026840 |                       | ULK4               | cis                         |       |        |                  |                |
| rs7650227  | PP     | ULK4      | ULK4                                        | 4      | LDproxy(CEU-1kg)  | 0.761                   | rs12635286 | Cerebellum (ScanDB)                      | 6.72E-12         | 3   | 42026840 |                       | ULK4               | cis                         |       |        |                  |                |
| rs7650227  | PP     | ULK4      | ULK4                                        | 4      | LDproxy(CEU-1kg)  | 0.761                   | rs12635286 | Liver (ScanDB)                           | 1.85E-08         | 3   | 42026840 |                       | ULK4               | cis                         |       |        |                  |                |
| rs7650227  | PP     | ULK4      | ULK4                                        | 4      | LDproxy(CEU-1kg)  | 0.761                   | rs12635286 | Liver (Greenawalt)                       | 1.76E-07         | 3   | 42026840 | 10025919071           | CTNNB1             | cis                         |       |        |                  |                |
| rs7650227  | PP     | ULK4      | ULK4                                        | 4      | LDproxy(CEU-1kg)  | 0.761                   | rs12635286 | Cerebellum (Alzheimer's)                 | 2.92E-05         | 3   | 42026840 | 10025919071           | CTNNB1             | cis                         |       |        |                  |                |
| rs7733331  | SBP    | NA        | NPR3                                        | 5      | LDproxy(CEU-Rel2) | 0.967                   | rs12656497 | Lung                                     | 1.67E-07         | 5   | 32867696 | 100142475_TG1_ε       | NPR3               | cis                         |       |        |                  |                |
| rs7733331  | SBP    | NA        | NPR3                                        | 5      | LDproxy(CEU-Rel2) | 0.84                    | rs1173766  | Lung                                     | 7.02E-08         | 5   | 32840285 | 100303568_TG1_ε       | NPR3               | cis                         |       |        |                  |                |
| rs7733331  | SBP    | NA        | NPR3                                        | 5      | LDproxy(CEU-H3)   | 0.784                   | rs1173756  | Lung                                     | 1.91E-08         | 5   | 32825609 | 100145622_TG1_ε       | NPR3               | cis                         |       |        |                  |                |
| rs7733331  | SBP    | NA        | NPR3                                        | 5      | LDproxy(CEU-1kg)  | 0.781                   | rs1173743  | Primary PHA-stimulated T cells (GenCord) | 5.68E-07         | 5   | 32775047 |                       | ENSG00000056097.1c | cis                         | 0.36  |        |                  |                |
| rs198823   | DBP    | NA        | HIST1H1E;HIST1H1T;HIST1H2BD;HIST1H2BC;HFE;H | 6      | IndexSNP          |                         | rs198823   | Cerebellum                               | 5.54E-21         | 6   | 26230912 | ILMN_2075334          | HIST1H4C           | cis                         |       |        |                  |                |
| rs198823   | DBP    | NA        | HIST1H1E;HIST1H1T;HIST1H2BD;HIST1H2BC;HFE;H | 6      | IndexSNP          |                         | rs198823   | Whole blood (CHARGE)                     | 1.30E-15         | 6   | 26230912 | 2970019               | HIST1H4H           | cis                         | -7.99 | G      | 6                | 26393396       |
| rs198823   | DBP    | NA        | HIST1H1E;HIST1H1T;HIST1H2BD;HIST1H2BC;HFE;H | 6      | IndexSNP          |                         | rs198823   | Temporal cortex                          | 2.59E-13         | 6   | 26230912 | ILMN_2075334          | HIST1H4C           | cis                         |       |        |                  |                |
| rs198823   | DBP    | NA        | HIST1H1E;HIST1H1T;HIST1H2BD;HIST1H2BC;HFE;H | 6      | IndexSNP          |                         | rs198823   | Liver(UChicago)                          | 0.02226068       | 6   | 26230912 | A_23_P395374          | HIST1H4D           | cis                         |       |        |                  |                |
| rs10948071 | PP     | NA        | TTBK1;CRIP3;SLC22A7;ZNF318                  | 7      | IndexSNP          |                         | rs10948071 | Whole blood (CHARGE)                     | 6.44E-09         | 6   | 43388691 | 7050040               | ZNF318             | cis                         | -5.81 | C      | 6                | 43412137       |
| rs10948071 | PP     | NA        | TTBK1;CRIP3;SLC22A7;ZNF318                  | 7      | IndexSNP          |                         | rs10948071 | LCL (MuTHER)                             | 1.82E-06         | 6   | 43388691 | ILMN_1694711          | MAD2L1BP           | cis                         |       |        |                  |                |
| rs10948071 | PP     | NA        | TTBK1;CRIP3;SLC22A7;ZNF318                  | 7      | IndexSNP          |                         | rs10948071 | Skin (MuTHER)                            | 2.56E-05         | 6   | 43388691 | ILMN_1694711          | MAD2L1BP           | cis                         |       |        |                  |                |
| rs10948071 | PP     | NA        | TTBK1;CRIP3;SLC22A7;ZNF318                  | 7      | LDproxy(CEU-1kg)  | 1                       | rs2242416  | Whole blood (Battle)                     | 4.88E-53         | 6   | 43273604 |                       | CRIP3              | cis                         |       |        |                  |                |
| rs10948071 | PP     | NA        | TTBK1;CRIP3;SLC22A7;ZNF318                  | 7      | LDproxy(CEU-1kg)  | 1                       | rs1574430  | Whole blood (CHARGE)                     | 2.71E-16         | 6   | 43377007 | 50193                 | ZNF318             | cis                         | -8.19 | A      | 6                | 43411954       |
| rs10948071 | PP     | NA        | TTBK1;CRIP3;SLC22A7;ZNF318                  | 7      | LDproxy(CEU-1kg)  | 1                       | rs2242416  | Whole blood (CHARGE)                     | 2.83E-16         | 6   | 43381582 | 50193                 | ZNF318             | cis                         | -8.18 | A      | 6                | 43411954       |
| rs10948071 | PP     | NA        | TTBK1;CRIP3;SLC22A7;ZNF318                  | 7      | LDproxy(CEU-1kg)  | 1                       | rs2469     | Whole blood (CHARGE)                     | 4.13E-16         | 6   | 43407301 | 50193                 | ZNF318             | cis                         | -8.13 | C      | 6                | 43411954       |
| rs10948071 | PP     | NA        | TTBK1;CRIP3;SLC22A7;ZNF318                  | 7      | LDproxy(CEU-1kg)  | 1                       | rs1574430  | Intestine (normal ileum)                 | 5.70E-14         | 6   | 43269029 |                       | CRIP3              | cis                         |       |        |                  |                |
| rs10948071 | PP     | NA        | TTBK1;CRIP3;SLC22A7;ZNF318                  | 7      | LDproxy(CEU-1kg)  | 1                       | rs2841648  | Intestine (normal ileum)                 | 5.70E-14         | 6   | 43269179 |                       | CRIP3              | cis                         |       |        |                  |                |
| rs10948071 | PP     | NA        | TTBK1;CRIP3;SLC22A7;ZNF318                  | 7      | LDproxy(CEU-1kg)  | 1                       | rs2242416  | Intestine (normal ileum)                 | 1.37E-13         | 6   | 43273604 |                       | CRIP3              | cis                         |       |        |                  |                |
| rs10948071 | PP     | NA        | TTBK1;CRIP3;SLC22A7;ZNF318                  | 7      | LDproxy(CEU-1kg)  | 1                       | rs2242416  | Blood(Fehrmann et al)                    | 5.90E-06         | 6   | 43381582 | 50193                 | ZNF318             | cis                         |       |        |                  |                |
| rs10948071 | PP     | NA        | TTBK1;CRIP3;SLC22A7;ZNF318                  | 7      | LDproxy(CEU-1kg)  | 1                       | rs2469     | Blood(Fehrmann et al)                    | 5.90E-06         | 6   | 43407301 | 50193                 | ZNF318             | cis                         |       |        |                  |                |
| rs10948071 | PP     | NA        | TTBK1;CRIP3;SLC22A7;ZNF318                  | 7      | LDproxy(CEU-1kg)  | 1                       | rs2469     | Skin (MuTHER)                            | 1.11E-05         | 6   | 43407301 | ILMN_1694711          | MAD2L1BP           | cis                         |       |        |                  |                |
| rs10948071 | PP     | NA        | TTBK1;CRIP3;SLC22A7;ZNF318                  | 7      | LDproxy(CEU-1kg)  | 1                       | rs2841648  | Skin (MuTHER)                            | 1.46E-05         | 6   | 43377157 | ILMN_1694711          | MAD2L1BP           | cis                         |       |        |                  |                |
| rs10948071 | PP     | NA        | TTBK1;CRIP3;SLC22A7;ZNF318                  | 7      | LDproxy(CEU-1kg)  | 1                       | rs1574430  | Skin (MuTHER)                            | 1.46E-05         | 6   | 43377007 | ILMN_1694711          | MAD2L1BP           | cis                         |       |        |                  |                |
| rs10948071 | PP     | NA        | TTBK1;CRIP3;SLC22A7;ZNF318                  | 7      | LDproxy(CEU-1kg)  | 1                       | rs2242416  | Skin (MuTHER)                            | 1.97E-05         | 6   | 43381582 | ILMN_1694711          | MAD2L1BP           | cis                         |       |        |                  |                |
| rs10948071 | PP     | NA        | TTBK1;CRIP3;SLC22A7;ZNF318                  | 7      | LDproxy(CEU-1kg)  | 1                       | rs2841648  | LCL (MuTHER)                             | 2.12E-05         | 6   | 43377157 | ILMN_1683279          | PEX6               | cis                         |       |        |                  |                |
| rs10948071 | PP     | NA        | TTBK1;CRIP3;SLC22A7;ZNF318                  | 7      | LDproxy(CEU-1kg)  | 1                       | rs1574430  | LCL (MuTHER)                             | 2.13E-05         | 6   | 43377007 | ILMN_1683279          | PEX6               | cis                         |       |        |                  |                |
| rs10948071 | PP     | NA        | TTBK1;CRIP3;SLC22A7;ZNF318                  | 7      | LDproxy(CEU-1kg)  | 1                       | rs2242416  | LCL (MuTHER)                             | 2.27E-05         | 6   | 43381582 | ILMN_1683279          | PEX6               | cis                         |       |        |                  |                |
| rs10948071 | PP     | NA        | TTBK1;CRIP3;SLC22A7;ZNF318                  | 7      | LDproxy(CEU-1kg)  | 1                       | rs2469     | LCL (MuTHER)                             | 2.74E-05         | 6   | 43407301 | ILMN_1683279          | PEX6               | cis                         |       |        |                  |                |
| rs10948071 | PP     | NA        | TTBK1;CRIP3;SLC22A7;ZNF318                  | 7      | LDproxy(CEU-1kg)  | 1                       | rs2469     | Lymph                                    | 0.00015064       | 6   | 43407301 | GI_37552195-S         | CRIP3              | cis                         |       |        |                  |                |
| rs10948071 | PP     | NA        | TTBK1;CRIP3;SLC22A7;ZNF318                  | 7      | LDproxy(CEU-1kg)  | 1                       | rs2242416  | Liver(UChicago)                          | 0.00071416       | 6   | 43381582 | A_23_P156562          | CRIP3              | cis                         |       |        |                  |                |
| rs10948071 | PP     | NA        | TTBK1;CRIP3;SLC22A7;ZNF318                  | 7      | LDproxy(CEU-1kg)  | 1                       | rs2469     | Liver(Greenawalt)                        | 1.75E-06;2.2E-06 | 6   | 43407301 | 1002590643;1002590644 | SLC22A7;SLC22A7    | cis                         |       |        |                  |                |
| rs10948071 | PP     | NA        | TTBK1;CRIP3;SLC22A7;ZNF318                  | 7      | LDproxy(CEU-1kg)  | 0.965                   | rs2125738  | Whole blood (CHARGE)                     | 1.78E-18         | 6   | 43435728 | 50193                 | ZNF318             | cis                         | -8.77 | A      | 6                | 43411954       |
| rs10948071 | PP     | NA        | TTBK1;CRIP3;SLC22A7;ZNF318                  | 7      | LDproxy(CEU-1kg)  | 0.965                   | rs2125737  | Whole blood (CHARGE)                     | 1.53E-16         | 6   | 43435514 | 50193                 | ZNF318             | cis                         | -8.25 | C      | 6                | 43411954       |
| rs10948071 | PP     | NA        | TTBK1;CRIP3;SLC22A7;ZNF318                  | 7      | LDproxy(CEU-1kg)  | 0.965                   | rs4714677  | Whole blood (CHARGE)                     | 1.53E-16         | 6   | 43435017 | 50193                 | ZNF318             | cis                         | -8.25 | G      | 6                | 43411954       |
| rs10948071 | PP     | NA        | TTBK1;CRIP3;SLC22A7;ZNF318                  | 7      | LDproxy(CEU-1kg)  | 0.965                   | rs9369407  | Whole blood (CHARGE)                     | 1.53E-16         | 6   | 43435353 | 50193                 | ZNF318             | cis                         | -8.25 | A      | 6                | 43411954       |
| rs10948071 | PP     | NA        | TTBK1;CRIP3;SLC22A7;ZNF318                  | 7      | LDproxy(CEU-1kg)  | 0.965                   | rs9381237  | Whole blood (CHARGE)                     | 1.53E-16         | 6   | 43428388 | 50193                 | ZNF318             | cis                         | -8.25 | T      | 6                | 43411954       |
| rs10948071 | PP     | NA        | TTBK1;CRIP3;SLC22A7;ZNF318                  | 7      | LDproxy(CEU-1kg)  | 0.965                   | rs2841642  | Whole blood (CHARGE)                     | 1.66E-16         | 6   | 43410263 | 50193                 | ZNF318             | cis                         | -8.24 | G      | 6                | 43411954       |
| rs10948071 | PP     | NA        | TTBK1;CRIP3;SLC22A7;ZNF318                  | 7      | LDproxy(CEU-1kg)  | 0.965                   | rs2254303  | Intestine (normal ileum)                 | 5.70E-14         | 6   | 43276390 |                       | CRIP3              | cis                         |       |        |                  |                |
| rs10948071 | PP     | NA        | TTBK1;CRIP3;SLC22A7;ZNF318                  | 7      | LDproxy(CEU-1kg)  | 0.965                   | rs2125738  | Monocytes                                | 4.97E-12         | 6   | 43435728 |                       | ZNF318             | cis                         |       |        |                  |                |
| rs10948071 | PP     | NA        | TTBK1;CRIP3;SLC22A7;ZNF318                  | 7      | LDproxy(CEU-1kg)  | 0.965                   | rs9381237  | Blood(Fehrmann et al)                    | 2.50E-06         | 6   | 43428388 | 50193                 | ZNF318             | cis                         |       |        |                  |                |
| rs10948071 | PP     | NA        | TTBK1;CRIP3;SLC22A7;ZNF318                  | 7      | LDproxy(CEU-1kg)  | 0.965                   | rs2254303  | Skin (MuTHER)                            | 1.29E-05         | 6   | 43384368 | ILMN_1694711          | MAD2L1BP           | cis                         |       |        |                  |                |
| rs10948071 | PP     | NA        | TTBK1;CRIP3;SLC22A7;ZNF318                  | 7      | LDproxy(CEU-1kg)  | 0.965                   | rs2125737  | LCL (MuTHER)                             | 1.59E-05         | 6   | 43435514 | ILMN_1683279          | PEX6               | cis                         |       |        |                  |                |
| rs10948071 | PP     | NA        | TTBK1;CRIP3;SLC22A7;ZNF318                  | 7      | LDproxy(CEU-1kg)  | 0.965                   | rs9369407  | LCL (MuTHER)                             | 1.59E-05         | 6   | 43435353 | ILMN_1683279          | PEX6               | cis                         |       |        |                  |                |
| rs10948071 | PP     | NA        | TTBK1;CRIP3;SLC22A7;ZNF318                  | 7      | LDproxy(CEU-1kg)  | 0.965                   | rs4714677  | LCL (MuTHER)                             | 1.59E-05         | 6   | 43435017 | ILMN_1683279          | PEX6               | cis                         |       |        |                  |                |
| rs10948071 | PP     | NA        | TTBK1;CRIP3;SLC22A7;ZNF318                  | 7      | LDproxy(CEU-1kg)  | 0.965                   | rs2841642  | LCL (MuTHER)                             | 1.63E-05         | 6   | 43410263 | ILMN_1683279          | PEX6               | cis                         |       |        |                  |                |
| rs10948071 | PP     | NA        | TTBK1;CRIP3;SLC22A7;ZNF318                  | 7      | LDproxy(CEU-1kg)  | 0.965                   | rs9381237  | LCL (MuTHER)                             | 1.63E-05         | 6   | 43428388 | ILMN_1683279          | PEX6               | cis                         |       |        |                  |                |
| rs10948071 | PP     | NA        | TTBK1;CRIP3;SLC22A7;ZNF318                  | 7      | LDproxy(CEU-1kg)  | 0.965                   | rs2125738  | LCL (MuTHER)                             | 1.97E-05         | 6   | 43435728 | ILMN_1683279          | PEX6               | cis                         |       |        |                  |                |
| rs10948071 | PP     | NA        | TTBK1;CRIP3;SLC22A7;ZNF318                  | 7      | LDproxy(CEU-1kg)  | 0.965                   | rs2254303  | LCL (MuTHER)                             | 2.39E-05         | 6   | 43384368 | ILMN_1683279          | PEX6               | cis                         |       |        |                  |                |
| rs10948071 | PP     | NA        | TTBK1;CRIP3;SLC22A7;ZNF318                  | 7      | LDproxy(CEU-1kg)  | 0.965                   | rs9369407  | Skin (MuTHER)                            | 2.98E-05         | 6   | 43435353 | ILMN_1694711          | MAD2L1BP           | cis                         |       |        |                  |                |
| rs10948071 | PP     | NA        | TTBK1;CRIP3;SLC22A7;ZNF318                  | 7      | LDproxy(CEU-1kg)  | 0.965                   | rs2125737  | Skin (MuTHER)                            | 2.98E-05         | 6   | 43435514 | ILMN_1694711          | MAD2L1BP           | cis                         |       |        |                  |                |
| rs10948071 | PP     | NA        | TTBK1;CRIP3;SLC22A7;ZNF318                  | 7      | LDproxy(CEU-1kg)  | 0.965                   | rs4714677  | Skin (MuTHER)                            | 2.98E-05         | 6   | 43435017 | ILMN_1694711          | MAD2L1BP           | cis                         |       |        |                  |                |



| IndexSNP   | Traits      | InRefGene | RefGenes60kb               | Locus# | Index/LD status   | r <sup>2</sup> to index | eSNPid     | Tissue                                   | eSNP P value  | Chr | B36pos   | ArrayID         | Transcript        | type of eQTL (cis or trans) | Beta  | Allele | Probe Chromosome | Probe Position |
|------------|-------------|-----------|----------------------------|--------|-------------------|-------------------------|------------|------------------------------------------|---------------|-----|----------|-----------------|-------------------|-----------------------------|-------|--------|------------------|----------------|
| rs10948071 | PP          | NA        | TTBK1;CRIP3;SLC22A7;ZNF318 | 7      | LDproxy(CEU-1kg)  | 0.965                   | rs2841642  | Skin (MuTHER)                            | 3.15E-05      | 6   | 43410263 | ILMN_1694711    | MAD2L1BP          | cis                         |       |        |                  |                |
| rs10948071 | PP          | NA        | TTBK1;CRIP3;SLC22A7;ZNF318 | 7      | LDproxy(CEU-1kg)  | 0.965                   | rs9381237  | Skin (MuTHER)                            | 3.15E-05      | 6   | 43428388 | ILMN_1694711    | MAD2L1BP          | cis                         |       |        |                  |                |
| rs10948071 | PP          | NA        | TTBK1;CRIP3;SLC22A7;ZNF318 | 7      | LDproxy(CEU-1kg)  | 0.965                   | rs2125738  | Skin (MuTHER)                            | 3.27E-05      | 6   | 43435728 | ILMN_1694711    | MAD2L1BP          | cis                         |       |        |                  |                |
| rs10948071 | PP          | NA        | TTBK1;CRIP3;SLC22A7;ZNF318 | 7      | LDproxy(CEU-1kg)  | 0.965                   | rs2254303  | Lymph                                    | 0.00025613    | 6   | 43384368 | GI_37552195-S   | CRIP3             | cis                         |       |        |                  |                |
| rs10948071 | PP          | NA        | TTBK1;CRIP3;SLC22A7;ZNF318 | 7      | LDproxy(CEU-1kg)  | 0.931                   | rs9369408  | Whole blood (CHARGE)                     | 1.72E-16      | 6   | 43440164 | 50193           | ZNF318            | cis                         | -8.24 | C      | 6                | 43411954       |
| rs10948071 | PP          | NA        | TTBK1;CRIP3;SLC22A7;ZNF318 | 7      | LDproxy(CEU-1kg)  | 0.931                   | rs9369408  | Skin (MuTHER)                            | 6.63E-06      | 6   | 43440164 | ILMN_1694711    | MAD2L1BP          | cis                         |       |        |                  |                |
| rs10948071 | PP          | NA        | TTBK1;CRIP3;SLC22A7;ZNF318 | 7      | LDproxy(CEU-1kg)  | 0.931                   | rs9369408  | LCL (MuTHER)                             | 1.72E-05      | 6   | 43440164 | ILMN_1683279    | PEX6              | cis                         |       |        |                  |                |
| rs10948071 | PP          | NA        | TTBK1;CRIP3;SLC22A7;ZNF318 | 7      | LDproxy(CEU-Rel2) | 0.892                   | rs2396002  | LCL (MuTHER)                             | 5.60E-07      | 6   | 43367990 | ILMN_1694711    | MAD2L1BP          | cis                         |       |        |                  |                |
| rs10948071 | PP          | NA        | TTBK1;CRIP3;SLC22A7;ZNF318 | 7      | LDproxy(CEU-Rel2) | 0.892                   | rs2396002  | Whole blood (CHARGE)                     | 5.68E-07      | 6   | 43367990 | 7050040         | ZNF318            | cis                         | -5.00 | C      | 6                | 43412137       |
| rs10948071 | PP          | NA        | TTBK1;CRIP3;SLC22A7;ZNF318 | 7      | LDproxy(CEU-Rel2) | 0.892                   | rs2396002  | Skin (MuTHER)                            | 8.40E-06      | 6   | 43367990 | ILMN_1694711    | MAD2L1BP          | cis                         |       |        |                  |                |
| rs10948071 | PP          | NA        | TTBK1;CRIP3;SLC22A7;ZNF318 | 7      | LDproxy(CEU-Rel2) | 0.828                   | rs2841647  | Whole blood (CHARGE)                     | 3.05E-16      | 6   | 43377157 | 50193           | ZNF318            | cis                         | -8.17 | C      | 6                | 43411954       |
| rs10948071 | PP          | NA        | TTBK1;CRIP3;SLC22A7;ZNF318 | 7      | LDproxy(CEU-Rel2) | 0.828                   | rs2841647  | Skin (MuTHER)                            | 1.15E-05      | 6   | 43377158 | ILMN_1694711    | MAD2L1BP          | cis                         |       |        |                  |                |
| rs10948071 | PP          | NA        | TTBK1;CRIP3;SLC22A7;ZNF318 | 7      | LDproxy(CEU-Rel2) | 0.828                   | rs2841647  | LCL (MuTHER)                             | 2.68E-05      | 6   | 43377158 | ILMN_1683279    | PEX6              | cis                         |       |        |                  |                |
| rs10948071 | PP          | NA        | TTBK1;CRIP3;SLC22A7;ZNF318 | 7      | LDproxy(CEU-Rel2) | 0.748                   | rs4398731  | Liver(Greenawalt)                        | 1.26E-28      | 6   | 43387699 | 10025905145     | ZNF318            | cis                         |       |        |                  |                |
| rs10948071 | PP          | NA        | TTBK1;CRIP3;SLC22A7;ZNF318 | 7      | LDproxy(CEU-Rel2) | 0.748                   | rs6901866  | Monocytes                                | 1.18E-26      | 6   | 43368638 |                 | ZNF318            | cis                         |       |        |                  |                |
| rs10948071 | PP          | NA        | TTBK1;CRIP3;SLC22A7;ZNF318 | 7      | LDproxy(CEU-Rel2) | 0.748                   | rs4398731  | Visual cortex (all samples)              | 2.69E-25      | 6   | 43387699 | 10025905145     | ZNF318            | cis                         |       |        |                  |                |
| rs10948071 | PP          | NA        | TTBK1;CRIP3;SLC22A7;ZNF318 | 7      | LDproxy(CEU-Rel2) | 0.748                   | rs4398731  | omental                                  | 4.72E-23      | 6   | 43387699 | 10025905145     | ZNF318            | cis                         |       |        |                  |                |
| rs10948071 | PP          | NA        | TTBK1;CRIP3;SLC22A7;ZNF318 | 7      | LDproxy(CEU-Rel2) | 0.748                   | rs4398731  | SubCutAdipose(Greenawalt)                | 6.30E-19      | 6   | 43387699 | 10025905145     | ZNF318            | cis                         |       |        |                  |                |
| rs10948071 | PP          | NA        | TTBK1;CRIP3;SLC22A7;ZNF318 | 7      | LDproxy(CEU-Rel2) | 0.748                   | rs6901866  | Whole blood (CHARGE)                     | 5.81E-18      | 6   | 43368638 | 7050040         | ZNF318            | cis                         | -8.64 | C      | 6                | 43412137       |
| rs10948071 | PP          | NA        | TTBK1;CRIP3;SLC22A7;ZNF318 | 7      | LDproxy(CEU-Rel2) | 0.748                   | rs16896398 | Whole blood (CHARGE)                     | 8.93E-18      | 6   | 43370682 | 7050040         | ZNF318            | cis                         | -8.59 | T      | 6                | 43412137       |
| rs10948071 | PP          | NA        | TTBK1;CRIP3;SLC22A7;ZNF318 | 7      | LDproxy(CEU-Rel2) | 0.748                   | rs4398731  | Whole blood (CHARGE)                     | 1.55E-17      | 6   | 43387699 | 7050040         | ZNF318            | cis                         | -8.52 | A      | 6                | 43412137       |
| rs10948071 | PP          | NA        | TTBK1;CRIP3;SLC22A7;ZNF318 | 7      | LDproxy(CEU-Rel2) | 0.748                   | rs4398731  | Prefrontal cortex (normal samples)       | 8.53E-17      | 6   | 43387699 | 10025905145     | ZNF318            | cis                         |       |        |                  |                |
| rs10948071 | PP          | NA        | TTBK1;CRIP3;SLC22A7;ZNF318 | 7      | LDproxy(CEU-Rel2) | 0.748                   | rs4398731  | Whole blood (PAX) in breast cancer survi | 6.97E-11      | 6   | 43387699 | 6200307         | ZNF318            | cis                         |       |        |                  |                |
| rs10948071 | PP          | NA        | TTBK1;CRIP3;SLC22A7;ZNF318 | 7      | LDproxy(CEU-Rel2) | 0.748                   | rs4398731  | Intestine (normal ileum)                 | 5.10E-10      | 6   | 43279721 |                 | CRIP3             | cis                         |       |        |                  |                |
| rs10948071 | PP          | NA        | TTBK1;CRIP3;SLC22A7;ZNF318 | 7      | LDproxy(CEU-Rel2) | 0.748                   | rs4398731  | Cerebellum (Huntington's)                | 8.76E-10      | 6   | 43387699 | 10025905145     | ZNF318            | cis                         |       |        |                  |                |
| rs10948071 | PP          | NA        | TTBK1;CRIP3;SLC22A7;ZNF318 | 7      | LDproxy(CEU-Rel2) | 0.748                   | rs4398731  | Liver(Schroder)                          | 1.82E-09      | 6   | 43387699 |                 | ZNF318            | cis                         |       |        |                  |                |
| rs10948071 | PP          | NA        | TTBK1;CRIP3;SLC22A7;ZNF318 | 7      | LDproxy(CEU-Rel2) | 0.748                   | rs4398731  | Lymph                                    | 3.44E-08      | 6   | 43387699 | GI_37552195-S   | CRIP3             | cis                         |       |        |                  |                |
| rs10948071 | PP          | NA        | TTBK1;CRIP3;SLC22A7;ZNF318 | 7      | LDproxy(CEU-Rel2) | 0.748                   | rs6901866  | LCL (MuTHER)                             | 1.72E-05      | 6   | 43368638 | ILMN_1694711    | MAD2L1BP          | cis                         |       |        |                  |                |
| rs10948071 | PP          | NA        | TTBK1;CRIP3;SLC22A7;ZNF318 | 7      | LDproxy(CEU-Rel2) | 0.748                   | rs4398731  | Tcells                                   | 1.83E-05      | 6   | 43387699 |                 | PTK7              | cis                         |       |        |                  |                |
| rs10948071 | PP          | NA        | TTBK1;CRIP3;SLC22A7;ZNF318 | 7      | LDproxy(CEU-Rel2) | 0.748                   | rs6901866  | Skin (MuTHER)                            | 2.15E-05      | 6   | 43368638 | ILMN_1694711    | MAD2L1BP          | cis                         |       |        |                  |                |
| rs10948071 | PP          | NA        | TTBK1;CRIP3;SLC22A7;ZNF318 | 7      | LDproxy(CEU-Rel2) | 0.748                   | rs4398731  | LCL (MuTHER)                             | 2.20E-05      | 6   | 43387699 | ILMN_1694711    | MAD2L1BP          | cis                         |       |        |                  |                |
| rs10948071 | PP          | NA        | TTBK1;CRIP3;SLC22A7;ZNF318 | 7      | LDproxy(CEU-Rel2) | 0.748                   | rs4398731  | Skin (MuTHER)                            | 2.97E-05      | 6   | 43387699 | ILMN_1694711    | MAD2L1BP          | cis                         |       |        |                  |                |
| rs10948071 | PP          | NA        | TTBK1;CRIP3;SLC22A7;ZNF318 | 7      | LDproxy(CEU-Rel2) | 0.748                   | rs4398731  | Blood(Fehrmann et al)                    | 5.10E-20;1.00 | 6   | 43387699 | 50193;7210484   | ZNF318;RP3-330M21 | cis                         |       |        |                  |                |
| rs10948071 | PP          | NA        | TTBK1;CRIP3;SLC22A7;ZNF318 | 7      | LDproxy(CEU-Rel2) | 0.715                   | rs2279087  | Whole blood (CHARGE)                     | 1.75E-17      | 6   | 43407036 | 7050040         | ZNF318            | cis                         | -8.51 | G      | 6                | 43412137       |
| rs10948071 | PP          | NA        | TTBK1;CRIP3;SLC22A7;ZNF318 | 7      | LDproxy(CEU-Rel2) | 0.715                   | rs2279087  | Intestine (normal ileum)                 | 4.60E-10      | 6   | 43299058 |                 | CRIP3             | cis                         |       |        |                  |                |
| rs10948071 | PP          | NA        | TTBK1;CRIP3;SLC22A7;ZNF318 | 7      | LDproxy(CEU-Rel2) | 0.715                   | rs2279087  | LCL (MuTHER)                             | 1.75E-05      | 6   | 43407036 | ILMN_1694711    | MAD2L1BP          | cis                         |       |        |                  |                |
| rs10948071 | PP          | NA        | TTBK1;CRIP3;SLC22A7;ZNF318 | 7      | LDproxy(CEU-Rel2) | 0.715                   | rs2279087  | Skin (MuTHER)                            | 2.70E-05      | 6   | 43407036 | ILMN_1694711    | MAD2L1BP          | cis                         |       |        |                  |                |
| rs12244842 | DBP         | C10orf107 | C10orf107                  | 9      | LDproxy(CEU-1kg)  | 1                       | rs2393833  | Liver (ScanDB)                           | 8.10E-07      | 10  | 63115322 |                 | SGTA              | cis                         |       |        |                  |                |
| rs12244842 | DBP         | C10orf107 | C10orf107                  | 9      | LDproxy(CEU-1kg)  | 1                       | rs1224611  | Liver (ScanDB)                           | 9.54E-07      | 10  | 63129189 |                 | SH3BPIN1D1        | cis                         |       |        |                  |                |
| rs12244842 | DBP         | C10orf107 | C10orf107                  | 9      | LDproxy(CEU-1kg)  | 1                       | rs2393833  | Blood                                    | 0.0000286     | 10  | 63115322 | HSG00268758     | LOC219790         | cis                         |       |        |                  |                |
| rs7070797  | SBP         | NA        | C10orf107                  | 9      | LDproxy(CEU-Rel2) | 0.786                   | rs10509158 | Adipose                                  | 0.0000037     | 10  | 63177675 | HSG00269025     | NM_173554         | cis                         |       |        |                  |                |
| rs2166122  | MAP         | C10orf107 | C10orf107                  | 9      | LDproxy(CEU-Rel2) | 0.778                   | rs2588918  | EndometrialTumor                         | 0.00379818    | 10  | 63195030 |                 | C10orf107         | cis                         |       |        |                  |                |
| rs2166122  | MAP         | C10orf107 | C10orf107                  | 9      | LDproxy(CEU-Rel2) | 0.734                   | rs973237   | Liver (ScanDB)                           | 5.92E-07      | 10  | 63195307 |                 | FUCA1             | cis                         |       |        |                  |                |
| rs2166122  | MAP         | C10orf107 | C10orf107                  | 9      | LDproxy(CEU-Rel2) | 0.734                   | rs973237   | Prefrontal cortex (Alzheimer's)          | 9.15E-05      | 10  | 63195307 | 10025902662     | C10orf107         | cis                         |       |        |                  |                |
| rs2681472  | DBP/SBP/MAP | ATP2B1    | ATP2B1                     | 10     | IndexSNP          |                         | rs2681472  | Whole blood (CHARGE)                     | 1.83E-15      | 12  | 88533090 | 7320717         | WDR51B            | cis                         | 7.95  | G      | 12               | 88439646       |
| rs2681472  | DBP/SBP/MAP | ATP2B1    | ATP2B1                     | 10     | IndexSNP          |                         | rs2681472  | Liver (ScanDB)                           | 3.74E-07      | 12  | 88533090 |                 | LOC100131662      | cis                         |       |        |                  |                |
| rs2681472  | DBP/SBP/MAP | ATP2B1    | ATP2B1                     | 10     | IndexSNP          |                         | rs2681472  | Blood(Fehrmann et al)                    | 2.20E-08;2.20 | 12  | 88533090 | 6650035;7320717 | WDR51B;ATP2B1     | cis                         |       |        |                  |                |
| rs2681472  | DBP/SBP/MAP | ATP2B1    | ATP2B1                     | 10     | LDproxy(CEU-1kg)  | 1                       | rs11105368 | Whole blood (CHARGE)                     | 3.56E-15      | 12  | 88598572 | 7320717         | WDR51B            | cis                         | 7.87  | C      | 12               | 88439646       |
| rs2681472  | DBP/SBP/MAP | ATP2B1    | ATP2B1                     | 10     | LDproxy(CEU-1kg)  | 1                       | rs11105364 | Whole blood (CHARGE)                     | 3.80E-15      | 12  | 88593407 | 7320717         | WDR51B            | cis                         | 7.86  | G      | 12               | 88439646       |
| rs2681472  | DBP/SBP/MAP | ATP2B1    | ATP2B1                     | 10     | LDproxy(CEU-1kg)  | 1                       | rs11105354 | Whole blood (CHARGE)                     | 3.82E-15      | 12  | 88550654 | 7320717         | WDR51B            | cis                         | 7.86  | G      | 12               | 88439646       |
| rs2681472  | DBP/SBP/MAP | ATP2B1    | ATP2B1                     | 10     | LDproxy(CEU-1kg)  | 1                       | rs17249754 | Whole blood (CHARGE)                     | 4.81E-15      | 12  | 88584717 | 7320717         | WDR51B            | cis                         | 7.83  | A      | 12               | 88439646       |
| rs2681472  | DBP/SBP/MAP | ATP2B1    | ATP2B1                     | 10     | LDproxy(CEU-1kg)  | 1                       | rs12579302 | Whole blood (CHARGE)                     | 5.09E-15      | 12  | 88574634 | 7320717         | WDR51B            | cis                         | 7.82  | G      | 12               | 88439646       |
| rs2681472  | DBP/SBP/MAP | ATP2B1    | ATP2B1                     | 10     | LDproxy(CEU-Rel2) | 1                       | rs12230074 | Whole blood (CHARGE)                     | 5.11E-15      | 12  | 88614998 | 7320717         | WDR51B            | cis                         | 7.82  | G      | 12               | 88439646       |
| rs2681472  | DBP/SBP/MAP | ATP2B1    | ATP2B1                     | 10     | LDproxy(CEU-Rel2) | 1                       | rs11105378 | Whole blood (CHARGE)                     | 7.12E-15      | 12  | 88614872 | 7320717         | WDR51B            | cis                         | 7.78  | T      | 12               | 88439646       |
| rs2681472  | DBP/SBP/MAP | ATP2B1    | ATP2B1                     | 10     | LDproxy(CEU-Rel2) | 0.92                    | rs2681492  | Whole blood (CHARGE)                     | 7.76E-13      | 12  | 88537220 | 7320717         | WDR51B            | cis                         | 7.17  | C      | 12               | 88439646       |
| rs2681472  | DBP/SBP/MAP | ATP2B1    | ATP2B1                     | 10     | LDproxy(CEU-Rel2) | 0.92                    | rs2681492  | Liver (ScanDB)                           | 3.15E-07      | 12  | 88537220 |                 | LOC100131662      | cis                         |       |        |                  |                |
| rs2681472  | DBP/SBP/MAP | ATP2B1    | ATP2B1                     | 10     | LDproxy(CEU-Rel2) | 0.92                    | rs2681492  | Blood(Fehrmann et al)                    | 2.10E-08;5.90 | 12  | 88537220 | 6650035;7320717 | WDR51B;ATP2B1     | cis                         |       |        |                  |                |
| rs2681472  | DBP/SBP/MAP | ATP2B1    | ATP2B1                     | 10     | LDproxy(CEU-1kg)  | 0.915                   | rs4842666  | Whole blood (CHARGE)                     | 3.74E-07      | 12  | 88465680 | 7160609         | WDR51B            | cis                         | -5.08 | C      | 12               | 88337954       |
| rs2681472  | DBP/SBP/MAP | ATP2B1    | ATP2B1                     | 10     | LDproxy(CEU-1kg)  | 0.915                   | rs4842666  | Monocytes (CD14+)                        | 4.35E-05      | 12  | 88465680 | 9N1yR16R8pJ.Sv  | GALNT4            | cis                         |       |        |                  |                |

| IndexSNP   | Traits      | InRefGene | RefGenes60kb                    | Locus# | Index/LD status   | r <sup>2</sup> to index | eSNPid     | Tissue                             | eSNP P value     | Chr | B36pos    | ArrayID         | Transcript        | type of eQTL (cis or trans) | Beta  | Allele | Probe Chromosome | Probe Position |
|------------|-------------|-----------|---------------------------------|--------|-------------------|-------------------------|------------|------------------------------------|------------------|-----|-----------|-----------------|-------------------|-----------------------------|-------|--------|------------------|----------------|
| rs2681472  | DBP/SBP/MAP | ATP2B1    | ATP2B1                          | 10     | LDproxy(CEU-H3)   | 0.805                   | rs11105328 | Monocytes (CD14+)                  | 5.41E-05         | 12  | 88466521  | 9N1yRY16R8pJ.Sv | GALNT4            | cis                         |       |        |                  |                |
| rs3184504  | DBP/MAP     | SH2B3     | ATXN2;SH2B3                     | 11     | IndexSNP          |                         | rs3184504  | Liver(Greenawalt)                  | 4.63E-26         | 12  | 110368991 | 10023848139     | AL049919          | cis                         |       |        |                  |                |
| rs4766578  | SBP         | SH2B3     | ATXN2;SH2B3                     | 11     | IndexSNP          |                         | rs4766578  | Whole blood (CHARGE)               | 5.62E-20         | 12  | 110388754 | 6560301         | SH2B3             | cis                         | 9.15  | T      | 12               | 110373489      |
| rs3184504  | DBP/MAP     | SH2B3     | ATXN2;SH2B3                     | 11     | IndexSNP          |                         | rs3184504  | Whole blood (CHARGE)               | 5.02E-19         | 12  | 110368991 | 6560301         | SH2B3             | cis                         | 8.91  | T      | 12               | 110373489      |
| rs3184504  | DBP/MAP     | SH2B3     | ATXN2;SH2B3                     | 11     | IndexSNP          |                         | rs3184504  | Visual cortex (Huntington's)       | 1.75E-12         | 12  | 110368991 | 10023848139     | AL049919          | cis                         |       |        |                  |                |
| rs3184504  | DBP/MAP     | SH2B3     | ATXN2;SH2B3                     | 11     | IndexSNP          |                         | rs3184504  | Prefrontal cortex (normal samples) | 7.00E-11         | 12  | 110368991 | 10023848139     | AL049919          | cis                         |       |        |                  |                |
| rs3184504  | DBP/MAP     | SH2B3     | ATXN2;SH2B3                     | 11     | IndexSNP          |                         | rs3184504  | Whole blood (CHARGE)               | 2.00E-07         | 12  | 110368991 | 7570673         | UPP1              | trans                       | 5.20  | T      | 7                | 48114477       |
| rs3184504  | DBP/MAP     | SH2B3     | ATXN2;SH2B3                     | 11     | IndexSNP          |                         | rs3184504  | Blood(Fehrmann et al)              | 3.50E-07         | 12  | 110368991 | 6560301         | SH2B3;ATXN2       | cis                         |       |        |                  |                |
| rs3184504  | DBP/MAP     | SH2B3     | ATXN2;SH2B3                     | 11     | IndexSNP          |                         | rs3184504  | Blood                              | 0.0002037        | 12  | 110368991 | HSG00276844     | FLJ21127          | cis                         |       |        |                  |                |
| rs4766578  | SBP         | SH2B3     | ATXN2;SH2B3                     | 11     | LDproxy(CEU-Rel2) | 1                       | rs10774625 | Whole blood (CHARGE)               | 8.15E-20         | 12  | 110394602 | 6560301         | SH2B3             | cis                         | 9.11  | A      | 12               | 110373489      |
| rs3184504  | DBP/MAP     | SH2B3     | ATXN2;SH2B3                     | 11     | LDproxy(CEU-Rel2) | 1                       | rs653178   | Whole blood (CHARGE)               | 1.68E-19         | 12  | 110492139 | 6560301         | SH2B3             | cis                         | 9.03  | C      | 12               | 110373489      |
| rs4766578  | SBP         | SH2B3     | ATXN2;SH2B3                     | 11     | LDproxy(CEU-Rel2) | 1                       | rs10774625 | Whole blood (CHARGE)               | 3.56E-08         | 12  | 110394602 | 2070170         | UBE2L6            | trans                       | 5.51  | A      | 11               | 57075756       |
| rs3184504  | DBP/MAP     | SH2B3     | ATXN2;SH2B3                     | 11     | LDproxy(CEU-Rel2) | 1                       | rs653178   | Cerebellum (all samples)           | 9.56E-08         | 12  | 110492139 | 10023848139     | AL049919          | cis                         |       |        |                  |                |
| rs3184504  | DBP/MAP     | SH2B3     | ATXN2;SH2B3                     | 11     | LDproxy(CEU-Rel2) | 1                       | rs653178   | Whole blood (CHARGE)               | 4.37E-07         | 12  | 110492139 | 7570673         | UPP1              | trans                       | 5.05  | C      | 7                | 48114477       |
| rs3184504  | DBP/MAP     | SH2B3     | ATXN2;SH2B3                     | 11     | LDproxy(CEU-Rel2) | 1                       | rs653178   | Blood(Fehrmann et al)              | 2.20E-07;9.0E-11 | 12  | 110492139 | 6560301;840253  | SH2B3;ATXN2;ALDH2 | cis                         |       |        |                  |                |
| rs4766578  | SBP         | SH2B3     | ATXN2;SH2B3                     | 11     | LDproxy(CEU-1kg)  | 0.967                   | rs3184504  | Liver(Greenawalt)                  | 4.63E-26         | 12  | 110368991 | 10023848139     | AL049919          | cis                         |       |        |                  |                |
| rs3184504  | DBP/MAP     | SH2B3     | ATXN2;SH2B3                     | 11     | LDproxy(CEU-1kg)  | 0.967                   | rs4766578  | Whole blood (CHARGE)               | 5.62E-20         | 12  | 110388754 | 6560301         | SH2B3             | cis                         | 9.15  | T      | 12               | 110373489      |
| rs4766578  | SBP         | SH2B3     | ATXN2;SH2B3                     | 11     | LDproxy(CEU-1kg)  | 0.967                   | rs3184504  | Whole blood (CHARGE)               | 5.02E-19         | 12  | 110368991 | 6560301         | SH2B3             | cis                         | 8.91  | T      | 12               | 110373489      |
| rs4766578  | SBP         | SH2B3     | ATXN2;SH2B3                     | 11     | LDproxy(CEU-1kg)  | 0.967                   | rs3184504  | Visual cortex (Huntington's)       | 1.75E-12         | 12  | 110368991 | 10023848139     | AL049919          | cis                         |       |        |                  |                |
| rs4766578  | SBP         | SH2B3     | ATXN2;SH2B3                     | 11     | LDproxy(CEU-1kg)  | 0.967                   | rs3184504  | Prefrontal cortex (normal samples) | 7.00E-11         | 12  | 110368991 | 10023848139     | AL049919          | cis                         |       |        |                  |                |
| rs4766578  | SBP         | SH2B3     | ATXN2;SH2B3                     | 11     | LDproxy(CEU-1kg)  | 0.967                   | rs3184504  | Whole blood (CHARGE)               | 2.00E-07         | 12  | 110368991 | 7570673         | UPP1              | trans                       | 5.20  | T      | 7                | 48114477       |
| rs4766578  | SBP         | SH2B3     | ATXN2;SH2B3                     | 11     | LDproxy(CEU-1kg)  | 0.967                   | rs3184504  | Blood(Fehrmann et al)              | 3.50E-07         | 12  | 110368991 | 6560301         | SH2B3;ATXN2       | cis                         |       |        |                  |                |
| rs4766578  | SBP         | SH2B3     | ATXN2;SH2B3                     | 11     | LDproxy(CEU-1kg)  | 0.967                   | rs3184504  | Blood                              | 0.0002037        | 12  | 110368991 | HSG00276844     | FLJ21127          | cis                         |       |        |                  |                |
| rs11072518 | SBP/MAP     | NA        | SCAMP5;COX5A;RPP25;C15orf17;MPI | 12     | IndexSNP          |                         | rs11072518 | Whole blood (CHARGE)               | 1.57E-34         | 15  | 73021663  | 4480132         | ULK3              | cis                         | 12.26 | T      | 15               | 72915933       |
| rs11072518 | SBP/MAP     | NA        | SCAMP5;COX5A;RPP25;C15orf17;MPI | 12     | IndexSNP          |                         | rs11072518 | omental                            | 1.11E-13         | 15  | 73021663  | 10023814330     | MPI               | cis                         |       |        |                  |                |
| rs11072518 | SBP/MAP     | NA        | SCAMP5;COX5A;RPP25;C15orf17;MPI | 12     | IndexSNP          |                         | rs11072518 | Subc adipose (MuTHER)              | 8.68E-09         | 15  | 73021663  | ILMN_1679495    | ULK3              | cis                         |       |        |                  |                |
| rs11072518 | SBP/MAP     | NA        | SCAMP5;COX5A;RPP25;C15orf17;MPI | 12     | IndexSNP          |                         | rs11072518 | Lymph                              | 8.12E-08         | 15  | 73021663  | GI_4505234-S    | MPI               | cis                         |       |        |                  |                |
| rs11072518 | SBP/MAP     | NA        | SCAMP5;COX5A;RPP25;C15orf17;MPI | 12     | IndexSNP          |                         | rs11072518 | LCL (MuTHER)                       | 5.27E-07         | 15  | 73021663  | ILMN_1761262    | MPI               | cis                         |       |        |                  |                |
| rs11072518 | SBP/MAP     | NA        | SCAMP5;COX5A;RPP25;C15orf17;MPI | 12     | IndexSNP          |                         | rs11072518 | Skin (MuTHER)                      | 7.69E-07         | 15  | 73021663  | ILMN_1679495    | ULK3              | cis                         |       |        |                  |                |
| rs11072518 | SBP/MAP     | NA        | SCAMP5;COX5A;RPP25;C15orf17;MPI | 12     | IndexSNP          |                         | rs11072518 | Bcells (CD19+)                     | 3.32E-06         | 15  | 73021663  | ubt121W7_Z_FO   | CSK               | cis                         |       |        |                  |                |
| rs11072518 | SBP/MAP     | NA        | SCAMP5;COX5A;RPP25;C15orf17;MPI | 12     | IndexSNP          |                         | rs11072518 | Prefrontal cortex (Alzheimer's)    | 3.32E-04         | 15  | 73021663  | 10023814330     | MPI               | cis                         |       |        |                  |                |
| rs11072518 | SBP/MAP     | NA        | SCAMP5;COX5A;RPP25;C15orf17;MPI | 12     | IndexSNP          |                         | rs11072518 | Monocytes (CD14+)                  | 0.000374         | 15  | 73021663  | r_tdn3VF1V3qV   | ULK3              | cis                         |       |        |                  |                |
| rs11072518 | SBP/MAP     | NA        | SCAMP5;COX5A;RPP25;C15orf17;MPI | 12     | IndexSNP          |                         | rs11072518 | Blood(Fehrmann et al)              | 1.90E-27;7.9E-15 | 15  | 73021663  | 3170239;4480132 | CSK;ULK3;COX5A;SC | cis                         |       |        |                  |                |
| rs11072518 | SBP/MAP     | NA        | SCAMP5;COX5A;RPP25;C15orf17;MPI | 12     | LDproxy(CEU-Rel2) | 0.861                   | rs3765066  | Whole blood (CHARGE)               | 5.55E-45         | 15  | 72927907  | 4480132         | ULK3              | cis                         | 14.07 | G      | 15               | 72915933       |
| rs11072518 | SBP/MAP     | NA        | SCAMP5;COX5A;RPP25;C15orf17;MPI | 12     | LDproxy(CEU-Rel2) | 0.861                   | rs3765066  | LCL in asthmatics (Liang 1kg)      | 1.06E-23         | 15  | 72927907  | 202472_at       | MPI               | cis                         |       |        |                  |                |
| rs11072518 | SBP/MAP     | NA        | SCAMP5;COX5A;RPP25;C15orf17;MPI | 12     | LDproxy(CEU-Rel2) | 0.861                   | rs3765066  | Subc adipose (MuTHER)              | 1.16E-09         | 15  | 72927907  | ILMN_1679495    | ULK3              | cis                         |       |        |                  |                |
| rs11072518 | SBP/MAP     | NA        | SCAMP5;COX5A;RPP25;C15orf17;MPI | 12     | LDproxy(CEU-Rel2) | 0.861                   | rs3765066  | Skin (MuTHER)                      | 1.15E-08         | 15  | 72927907  | ILMN_1679495    | ULK3              | cis                         |       |        |                  |                |
| rs11072518 | SBP/MAP     | NA        | SCAMP5;COX5A;RPP25;C15orf17;MPI | 12     | LDproxy(CEU-Rel2) | 0.861                   | rs3765066  | Lung                               | 1.32E-07         | 15  | 72927907  | 100151075_TGI_ε | ULK3              | cis                         |       |        |                  |                |
| rs11072518 | SBP/MAP     | NA        | SCAMP5;COX5A;RPP25;C15orf17;MPI | 12     | LDproxy(CEU-Rel2) | 0.861                   | rs3765066  | Bcells (CD19+)                     | 4.65E-07         | 15  | 72927907  | ubt121W7_Z_FO   | CSK               | cis                         |       |        |                  |                |
| rs11072518 | SBP/MAP     | NA        | SCAMP5;COX5A;RPP25;C15orf17;MPI | 12     | LDproxy(CEU-Rel2) | 0.861                   | rs3765066  | LCL (MuTHER)                       | 4.26E-06         | 15  | 72927907  | ILMN_1761262    | MPI               | cis                         |       |        |                  |                |
| rs11072518 | SBP/MAP     | NA        | SCAMP5;COX5A;RPP25;C15orf17;MPI | 12     | LDproxy(CEU-H3)   | 0.77                    | rs8042694  | Whole blood (CHARGE)               | 2.10E-47         | 15  | 73012468  | 4480132         | ULK3              | cis                         | 14.46 | G      | 15               | 72915933       |
| rs11072518 | SBP/MAP     | NA        | SCAMP5;COX5A;RPP25;C15orf17;MPI | 12     | LDproxy(CEU-H3)   | 0.77                    | rs8042694  | Subc adipose (MuTHER)              | 3.46E-12         | 15  | 73012468  | ILMN_1679495    | ULK3              | cis                         |       |        |                  |                |
| rs11072518 | SBP/MAP     | NA        | SCAMP5;COX5A;RPP25;C15orf17;MPI | 12     | LDproxy(CEU-H3)   | 0.77                    | rs8042694  | LCL (MuTHER)                       | 4.95E-08         | 15  | 73012468  | ILMN_1761262    | MPI               | cis                         |       |        |                  |                |
| rs11072518 | SBP/MAP     | NA        | SCAMP5;COX5A;RPP25;C15orf17;MPI | 12     | LDproxy(CEU-H3)   | 0.77                    | rs8042694  | Skin (MuTHER)                      | 6.16E-07         | 15  | 73012468  | ILMN_1679495    | ULK3              | cis                         |       |        |                  |                |
| rs11072518 | SBP/MAP     | NA        | SCAMP5;COX5A;RPP25;C15orf17;MPI | 12     | LDproxy(CEU-H3)   | 0.77                    | rs8042694  | Lymph                              | 1.02E-05         | 15  | 73012468  | GI_4505234-S    | MPI               | cis                         |       |        |                  |                |
| rs11072518 | SBP/MAP     | NA        | SCAMP5;COX5A;RPP25;C15orf17;MPI | 12     | LDproxy(CEU-H3)   | 0.77                    | rs8042694  | Cerebellum (all samples)           | 9.88E-05         | 15  | 73012468  | 10025904895     | C15orf17          | cis                         |       |        |                  |                |
| rs11072518 | SBP/MAP     | NA        | SCAMP5;COX5A;RPP25;C15orf17;MPI | 12     | LDproxy(CEU-H3)   | 0.754                   | rs6495126  | Monocytes                          | 4.69E-54         | 15  | 72962079  |                 | ULK3              | cis                         |       |        |                  |                |
| rs11072518 | SBP/MAP     | NA        | SCAMP5;COX5A;RPP25;C15orf17;MPI | 12     | LDproxy(CEU-H3)   | 0.754                   | rs8031937  | Whole blood (CHARGE)               | 4.20E-48         | 15  | 72968174  | 4480132         | ULK3              | cis                         | 14.57 | A      | 15               | 72915933       |
| rs11072518 | SBP/MAP     | NA        | SCAMP5;COX5A;RPP25;C15orf17;MPI | 12     | LDproxy(CEU-H3)   | 0.754                   | rs6495126  | Whole blood (CHARGE)               | 4.69E-48         | 15  | 72962079  | 4480132         | ULK3              | cis                         | 14.57 | A      | 15               | 72915933       |
| rs11072518 | SBP/MAP     | NA        | SCAMP5;COX5A;RPP25;C15orf17;MPI | 12     | LDproxy(CEU-H3)   | 0.754                   | rs6495127  | Whole blood (CHARGE)               | 5.76E-48         | 15  | 72981543  | 4480132         | ULK3              | cis                         | 14.55 | C      | 15               | 72915933       |
| rs11072518 | SBP/MAP     | NA        | SCAMP5;COX5A;RPP25;C15orf17;MPI | 12     | LDproxy(CEU-H3)   | 0.754                   | rs8031937  | LCL in asthmatics (Liang 1kg)      | 4.58E-23         | 15  | 72968174  | 202472_at       | MPI               | cis                         |       |        |                  |                |
| rs11072518 | SBP/MAP     | NA        | SCAMP5;COX5A;RPP25;C15orf17;MPI | 12     | LDproxy(CEU-H3)   | 0.754                   | rs6495126  | LCL in asthmatics (Liang 1kg)      | 5.33E-23         | 15  | 72962079  | 202472_at       | MPI               | cis                         |       |        |                  |                |
| rs11072518 | SBP/MAP     | NA        | SCAMP5;COX5A;RPP25;C15orf17;MPI | 12     | LDproxy(CEU-H3)   | 0.754                   | rs7497201  | LCL in asthmatics (Liang 1kg)      | 2.74E-22         | 15  | 72977743  | 202472_at       | MPI               | cis                         |       |        |                  |                |
| rs11072518 | SBP/MAP     | NA        | SCAMP5;COX5A;RPP25;C15orf17;MPI | 12     | LDproxy(CEU-H3)   | 0.754                   | rs8031937  | Subc adipose (MuTHER)              | 2.11E-12         | 15  | 72968174  | ILMN_1679495    | ULK3              | cis                         |       |        |                  |                |
| rs11072518 | SBP/MAP     | NA        | SCAMP5;COX5A;RPP25;C15orf17;MPI | 12     | LDproxy(CEU-H3)   | 0.754                   | rs6495126  | Subc adipose (MuTHER)              | 2.18E-12         | 15  | 72962079  | ILMN_1679495    | ULK3              | cis                         |       |        |                  |                |
| rs11072518 | SBP/MAP     | NA        | SCAMP5;COX5A;RPP25;C15orf17;MPI | 12     | LDproxy(CEU-H3)   | 0.754                   | rs6495127  | Subc adipose (MuTHER)              | 2.66E-12         | 15  | 72981543  | ILMN_1679495    | ULK3              | cis                         |       |        |                  |                |
| rs11072518 | SBP/MAP     | NA        | SCAMP5;COX5A;RPP25;C15orf17;MPI | 12     | LDproxy(CEU-H3)   | 0.754                   | rs6495127  | Whole blood (Battle)               | 3.91E-11         | 15  | 75194490  |                 | COX5A             | cis                         |       |        |                  |                |
| rs11072518 | SBP/MAP     | NA        | SCAMP5;COX5A;RPP25;C15orf17;MPI | 12     | LDproxy(CEU-H3)   | 0.754                   | rs6495126  | Cerebellum (all samples)           | 3.89E-10         | 15  | 72962079  | 10023814330     | MPI               |                             |       |        |                  |                |

| IndexSNP   | Traits  | InRefGene | RefGenes60kb                    | Locus# | Index/LD status   | r <sup>2</sup> to index | eSNPid     | Tissue                        | eSNP P value      | Chr | B36pos               | ArrayID            | Transcript          | type of eQTL (cis or trans) | Beta  | Allele | Probe Chromosome | Probe Position |
|------------|---------|-----------|---------------------------------|--------|-------------------|-------------------------|------------|-------------------------------|-------------------|-----|----------------------|--------------------|---------------------|-----------------------------|-------|--------|------------------|----------------|
| rs11072518 | SBP/MAP | NA        | SCAMP5;COX5A;RPP25;C15orf17;MPI | 12     | LDproxy(CEU-H3)   | 0.754                   | rs6495127  | LCL (MUTHER)                  | 1.36E-07          | 15  | 72981543             | ILMN_1761262       | MPI                 | cis                         |       |        |                  |                |
| rs11072518 | SBP/MAP | NA        | SCAMP5;COX5A;RPP25;C15orf17;MPI | 12     | LDproxy(CEU-H3)   | 0.754                   | rs8031937  | LCL (MUTHER)                  | 2.10E-07          | 15  | 72968174             | ILMN_1761262       | MPI                 | cis                         |       |        |                  |                |
| rs11072518 | SBP/MAP | NA        | SCAMP5;COX5A;RPP25;C15orf17;MPI | 12     | LDproxy(CEU-H3)   | 0.754                   | rs6495126  | LCL (MUTHER)                  | 3.69E-07          | 15  | 72962079             | ILMN_1761262       | MPI                 | cis                         |       |        |                  |                |
| rs11072518 | SBP/MAP | NA        | SCAMP5;COX5A;RPP25;C15orf17;MPI | 12     | LDproxy(CEU-H3)   | 0.754                   | rs6495126  | Lymph                         | 7.22E-07          | 15  | 72962079             | GI_4505234-S       | MPI                 | cis                         |       |        |                  |                |
| rs11072518 | SBP/MAP | NA        | SCAMP5;COX5A;RPP25;C15orf17;MPI | 12     | LDproxy(CEU-H3)   | 0.754                   | rs6495127  | Skin (MUTHER)                 | 1.01E-06          | 15  | 72981543             | ILMN_1679495       | ULK3                | cis                         |       |        |                  |                |
| rs11072518 | SBP/MAP | NA        | SCAMP5;COX5A;RPP25;C15orf17;MPI | 12     | LDproxy(CEU-H3)   | 0.754                   | rs8031937  | Skin (MUTHER)                 | 1.52E-06          | 15  | 72968174             | ILMN_1679495       | ULK3                | cis                         |       |        |                  |                |
| rs11072518 | SBP/MAP | NA        | SCAMP5;COX5A;RPP25;C15orf17;MPI | 12     | LDproxy(CEU-H3)   | 0.754                   | rs6495126  | Skin (MUTHER)                 | 3.23E-06          | 15  | 72962079             | ILMN_1679495       | ULK3                | cis                         |       |        |                  |                |
| rs11072518 | SBP/MAP | NA        | SCAMP5;COX5A;RPP25;C15orf17;MPI | 12     | LDproxy(CEU-H3)   | 0.754                   | rs7497201  | Bcells (CD19+)                | 3.92E-06          | 15  | 72977743             | ubt12t1W7_Z_FO_CSK | CSK                 | cis                         |       |        |                  |                |
| rs11072518 | SBP/MAP | NA        | SCAMP5;COX5A;RPP25;C15orf17;MPI | 12     | LDproxy(CEU-H3)   | 0.754                   | rs6495127  | Bcells (CD19+)                | 4.00E-06          | 15  | 72981543             | ubt12t1W7_Z_FO_CSK | CSK                 | cis                         |       |        |                  |                |
| rs11072518 | SBP/MAP | NA        | SCAMP5;COX5A;RPP25;C15orf17;MPI | 12     | LDproxy(CEU-H3)   | 0.754                   | rs6495126  | Blood                         | 0.00000646        | 15  | 72962079             | HSG00291325        | MPI                 | cis                         |       |        |                  |                |
| rs11072518 | SBP/MAP | NA        | SCAMP5;COX5A;RPP25;C15orf17;MPI | 12     | LDproxy(CEU-H3)   | 0.754                   | rs8031937  | Bcells (CD19+)                | 6.61E-06          | 15  | 72968174             | ubt12t1W7_Z_FO_CSK | CSK                 | cis                         |       |        |                  |                |
| rs11072518 | SBP/MAP | NA        | SCAMP5;COX5A;RPP25;C15orf17;MPI | 12     | LDproxy(CEU-H3)   | 0.754                   | rs6495126  | SchadtLiver                   | 8.60E-06          | 15  | 72962079             |                    | ULK3                | cis                         |       |        |                  |                |
| rs11072518 | SBP/MAP | NA        | SCAMP5;COX5A;RPP25;C15orf17;MPI | 12     | LDproxy(CEU-H3)   | 0.754                   | rs6495126  | Bcells (CD19+)                | 8.77E-06          | 15  | 72962079             | ubt12t1W7_Z_FO_CSK | CSK                 | cis                         |       |        |                  |                |
| rs11072518 | SBP/MAP | NA        | SCAMP5;COX5A;RPP25;C15orf17;MPI | 12     | LDproxy(CEU-H3)   | 0.754                   | rs6495126  | Monocytes (CD14+)             | 7.18E-05          | 15  | 72962079             | Wu17hRSKTIKtHb     | C15ORF17            | cis                         |       |        |                  |                |
| rs11072518 | SBP/MAP | NA        | SCAMP5;COX5A;RPP25;C15orf17;MPI | 12     | LDproxy(CEU-H3)   | 0.754                   | rs6495127  | Monocytes (CD14+)             | 7.50E-05          | 15  | 72981543             | Wu17hRSKTIKtHb     | C15ORF17            | cis                         |       |        |                  |                |
| rs11072518 | SBP/MAP | NA        | SCAMP5;COX5A;RPP25;C15orf17;MPI | 12     | LDproxy(CEU-H3)   | 0.754                   | rs8031937  | Monocytes (CD14+)             | 0.000101          | 15  | 72968174             | Wu17hRSKTIKtHb     | C15ORF17            | cis                         |       |        |                  |                |
| rs11072518 | SBP/MAP | NA        | SCAMP5;COX5A;RPP25;C15orf17;MPI | 12     | LDproxy(CEU-H3)   | 0.754                   | rs7497201  | Monocytes (CD14+)             | 0.000152          | 15  | 72977743             | Wu17hRSKTIKtHb     | C15ORF17            | cis                         |       |        |                  |                |
| rs11072518 | SBP/MAP | NA        | SCAMP5;COX5A;RPP25;C15orf17;MPI | 12     | LDproxy(CEU-H3)   | 0.754                   | rs6495126  | Adipose                       | 0.0001963         | 15  | 72962079             | HSG00291325        | MPI                 | cis                         |       |        |                  |                |
| rs11072518 | SBP/MAP | NA        | SCAMP5;COX5A;RPP25;C15orf17;MPI | 12     | LDproxy(CEU-H3)   | 0.754                   | rs6495126  | Induced sputum (COPD cases)   | 0.00037621        | 15  | 72962079             | 224805_s_at        | C15orf17            | cis                         |       |        |                  |                |
| rs11072518 | SBP/MAP | NA        | SCAMP5;COX5A;RPP25;C15orf17;MPI | 12     | LDproxy(CEU-H3)   | 0.754                   | rs6495126  | Blood(Fehrmann et al)         | 2.00E-28;3.00E-28 | 15  | 72962079             | 3170239;4480132    | CSK;ULK3;C15orf17;C | cis                         |       |        |                  |                |
| rs11072518 | SBP/MAP | NA        | SCAMP5;COX5A;RPP25;C15orf17;MPI | 12     | LDproxy(CEU-H3)   | 0.751                   | rs11636952 | LCL in asthmatics (Liang 1kg) | 2.98E-23          | 15  | 72901375             | 202472_at          | MPI                 | cis                         |       |        |                  |                |
| rs11072518 | SBP/MAP | NA        | SCAMP5;COX5A;RPP25;C15orf17;MPI | 12     | LDproxy(CEU-H3)   | 0.751                   | rs11636952 | Bcells (CD19+)                | 1.06E-08          | 15  | 72901375             | ubt12t1W7_Z_FO_CSK | CSK                 | cis                         |       |        |                  |                |
| rs11072518 | SBP/MAP | NA        | SCAMP5;COX5A;RPP25;C15orf17;MPI | 12     | LDproxy(CEU-1kg)  | 0.75                    | rs1133323  | Monocytes                     | 8.25E-26          | 15  | 72999278             |                    | ULK3                | cis                         |       |        |                  |                |
| rs11072518 | SBP/MAP | NA        | SCAMP5;COX5A;RPP25;C15orf17;MPI | 12     | LDproxy(CEU-1kg)  | 0.75                    | rs1133323  | Whole blood (CHARGE)          | 5.97E-21          | 15  | 72999278             | 4480132            | ULK3                | cis                         | -9.39 | T      | 15               | 72915933       |
| rs11072518 | SBP/MAP | NA        | SCAMP5;COX5A;RPP25;C15orf17;MPI | 12     | LDproxy(CEU-1kg)  | 0.75                    | rs1133323  | LCL (MUTHER)                  | 3.18E-08          | 15  | 72999278             | ILMN_1761262       | MPI                 | cis                         |       |        |                  |                |
| rs11072518 | SBP/MAP | NA        | SCAMP5;COX5A;RPP25;C15orf17;MPI | 12     | LDproxy(CEU-1kg)  | 0.75                    | rs1133323  | LCL (MUTHER)                  | 1.30E-05          | 15  | 72999278             | ILMN_1679495       | ULK3                | cis                         |       |        |                  |                |
| rs11072518 | SBP/MAP | NA        | SCAMP5;COX5A;RPP25;C15orf17;MPI | 12     | LDproxy(CEU-1kg)  | 0.75                    | rs1133323  | Subc adipose (MUTHER)         | 2.40E-05          | 15  | 72999278             | ILMN_2364535       | SNUPN               | cis                         |       |        |                  |                |
| rs11072518 | SBP/MAP | NA        | SCAMP5;COX5A;RPP25;C15orf17;MPI | 12     | LDproxy(CEU-1kg)  | 0.75                    | rs1133323  | Bcells (CD19+)                | 3.86E-05          | 15  | 72999278             | ubt12t1W7_Z_FO_CSK | CSK                 | cis                         |       |        |                  |                |
| rs11072518 | SBP/MAP | NA        | SCAMP5;COX5A;RPP25;C15orf17;MPI | 12     | LDproxy(CEU-Rel2) | 0.735                   | rs4886633  | Whole blood (CHARGE)          | 3.99E-48          | 15  | 72965260             | 4480132            | ULK3                | cis                         | 14.58 | G      | 15               | 72915933       |
| rs11072518 | SBP/MAP | NA        | SCAMP5;COX5A;RPP25;C15orf17;MPI | 12     | LDproxy(CEU-Rel2) | 0.735                   | rs4886633  | LCL in asthmatics (Liang 1kg) | 5.73E-23          | 15  | 72965260             | 202472_at          | MPI                 | cis                         |       |        |                  |                |
| rs11072518 | SBP/MAP | NA        | SCAMP5;COX5A;RPP25;C15orf17;MPI | 12     | LDproxy(CEU-H3)   | 0.733                   | rs1378942  | Monocytes                     | 3.21E-35          | 15  | 72864420             |                    | ULK3                | cis                         |       |        |                  |                |
| rs11072518 | SBP/MAP | NA        | SCAMP5;COX5A;RPP25;C15orf17;MPI | 12     | LDproxy(CEU-Rel2) | 0.733                   | rs1378940  | Whole blood (CHARGE)          | 6.15E-35          | 15  | 72870547             | 4480132            | ULK3                | cis                         | 12.33 | C      | 15               | 72915933       |
| rs11072518 | SBP/MAP | NA        | SCAMP5;COX5A;RPP25;C15orf17;MPI | 12     | LDproxy(CEU-Rel2) | 0.733                   | rs3784789  | Whole blood (CHARGE)          | 3.65E-34          | 15  | 72869605             | 4480132            | ULK3                | cis                         | 12.19 | C      | 15               | 72915933       |
| rs11072518 | SBP/MAP | NA        | SCAMP5;COX5A;RPP25;C15orf17;MPI | 12     | LDproxy(CEU-Rel2) | 0.733                   | rs1378941  | Whole blood (CHARGE)          | 4.77E-34          | 15  | 72867203             | 4480132            | ULK3                | cis                         | 12.17 | C      | 15               | 72915933       |
| rs11072518 | SBP/MAP | NA        | SCAMP5;COX5A;RPP25;C15orf17;MPI | 12     | LDproxy(CEU-Rel2) | 0.733                   | rs4886410  | Whole blood (CHARGE)          | 6.23E-34          | 15  | 72852697             | 4480132            | ULK3                | cis                         | 12.14 | G      | 15               | 72915933       |
| rs11072518 | SBP/MAP | NA        | SCAMP5;COX5A;RPP25;C15orf17;MPI | 12     | LDproxy(CEU-H3)   | 0.733                   | rs1378942  | Whole blood (CHARGE)          | 5.71E-33          | 15  | 72864420             | 4480132            | ULK3                | cis                         | 11.96 | C      | 15               | 72915933       |
| rs11072518 | SBP/MAP | NA        | SCAMP5;COX5A;RPP25;C15orf17;MPI | 12     | LDproxy(CEU-Rel2) | 0.733                   | rs1378940  | Whole blood (Battle)          | 1.79E-27          | 15  | 75083494             |                    | CSK                 | cis                         |       |        |                  |                |
| rs11072518 | SBP/MAP | NA        | SCAMP5;COX5A;RPP25;C15orf17;MPI | 12     | LDproxy(CEU-Rel2) | 0.733                   | rs1378940  | Bcells (CD19+)                | 1.33E-08          | 15  | 72870547             | ubt12t1W7_Z_FO_CSK | CSK                 | cis                         |       |        |                  |                |
| rs11072518 | SBP/MAP | NA        | SCAMP5;COX5A;RPP25;C15orf17;MPI | 12     | LDproxy(CEU-Rel2) | 0.733                   | rs1378940  | Skin (MUTHER)                 | 1.37E-08          | 15  | 72870547             | ILMN_1679495       | ULK3                | cis                         |       |        |                  |                |
| rs11072518 | SBP/MAP | NA        | SCAMP5;COX5A;RPP25;C15orf17;MPI | 12     | LDproxy(CEU-Rel2) | 0.733                   | rs1378941  | Skin (MUTHER)                 | 1.75E-08          | 15  | 72869605             | ILMN_1679495       | ULK3                | cis                         |       |        |                  |                |
| rs11072518 | SBP/MAP | NA        | SCAMP5;COX5A;RPP25;C15orf17;MPI | 12     | LDproxy(CEU-Rel2) | 0.733                   | rs1378941  | Skin (MUTHER)                 | 2.59E-08          | 15  | 72867203             | ILMN_1679495       | ULK3                | cis                         |       |        |                  |                |
| rs11072518 | SBP/MAP | NA        | SCAMP5;COX5A;RPP25;C15orf17;MPI | 12     | LDproxy(CEU-H3)   | 0.733                   | rs1378942  | Skin (MUTHER)                 | 3.12E-08          | 15  | 72864420             | ILMN_1679495       | ULK3                | cis                         |       |        |                  |                |
| rs11072518 | SBP/MAP | NA        | SCAMP5;COX5A;RPP25;C15orf17;MPI | 12     | LDproxy(CEU-Rel2) | 0.733                   | rs4886410  | Skin (MUTHER)                 | 3.16E-08          | 15  | 72852697             | ILMN_1679495       | ULK3                | cis                         |       |        |                  |                |
| rs11072518 | SBP/MAP | NA        | SCAMP5;COX5A;RPP25;C15orf17;MPI | 12     | LDproxy(CEU-Rel2) | 0.733                   | rs3784789  | Subc adipose (MUTHER)         | 4.43E-08          | 15  | 72869605             | ILMN_1679495       | ULK3                | cis                         |       |        |                  |                |
| rs11072518 | SBP/MAP | NA        | SCAMP5;COX5A;RPP25;C15orf17;MPI | 12     | LDproxy(CEU-Rel2) | 0.733                   | rs1378941  | Subc adipose (MUTHER)         | 4.62E-08          | 15  | 72867203             | ILMN_1679495       | ULK3                | cis                         |       |        |                  |                |
| rs11072518 | SBP/MAP | NA        | SCAMP5;COX5A;RPP25;C15orf17;MPI | 12     | LDproxy(CEU-Rel2) | 0.733                   | rs1378940  | Subc adipose (MUTHER)         | 4.72E-08          | 15  | 72870547             | ILMN_1679495       | ULK3                | cis                         |       |        |                  |                |
| rs11072518 | SBP/MAP | NA        | SCAMP5;COX5A;RPP25;C15orf17;MPI | 12     | LDproxy(CEU-H3)   | 0.733                   | rs1378942  | Subc adipose (MUTHER)         | 6.30E-08          | 15  | 72864420             | ILMN_1679495       | ULK3                | cis                         |       |        |                  |                |
| rs11072518 | SBP/MAP | NA        | SCAMP5;COX5A;RPP25;C15orf17;MPI | 12     | LDproxy(CEU-Rel2) | 0.733                   | rs4886410  | Subc adipose (MUTHER)         | 7.48E-08          | 15  | 72852697             | ILMN_1679495       | ULK3                | cis                         |       |        |                  |                |
| rs11072518 | SBP/MAP | NA        | SCAMP5;COX5A;RPP25;C15orf17;MPI | 12     | LDproxy(CEU-Rel2) | 0.733                   | rs3784789  | Whole blood (DeepSAGEseq)     | 1.48E-06          | 15  | 75082552_15_75095325 |                    | None:15_75095325    | cis                         |       |        |                  |                |
| rs11072518 | SBP/MAP | NA        | SCAMP5;COX5A;RPP25;C15orf17;MPI | 12     | LDproxy(CEU-Rel2) | 0.733                   | rs4886410  | LCL (MUTHER)                  | 3.79E-06          | 15  | 72852697             | ILMN_1761262       | MPI                 | cis                         |       |        |                  |                |
| rs11072518 | SBP/MAP | NA        | SCAMP5;COX5A;RPP25;C15orf17;MPI | 12     | LDproxy(CEU-Rel2) | 0.733                   | rs1378940  | LCL (MUTHER)                  | 4.06E-06          | 15  | 72870547             | ILMN_1761262       | MPI                 | cis                         |       |        |                  |                |
| rs11072518 | SBP/MAP | NA        | SCAMP5;COX5A;RPP25;C15orf17;MPI | 12     | LDproxy(CEU-Rel2) | 0.733                   | rs1378941  | LCL (MUTHER)                  | 4.16E-06          | 15  | 72867203             | ILMN_1761262       | MPI                 | cis                         |       |        |                  |                |
| rs11072518 | SBP/MAP | NA        | SCAMP5;COX5A;RPP25;C15orf17;MPI | 12     | LDproxy(CEU-Rel2) | 0.733                   | rs3784789  | LCL (MUTHER)                  | 4.43E-06          | 15  | 72869605             | ILMN_1761262       | MPI                 | cis                         |       |        |                  |                |
| rs11072518 | SBP/MAP | NA        | SCAMP5;COX5A;RPP25;C15orf17;MPI | 12     | LDproxy(CEU-H3)   | 0.733                   | rs1378942  | LCL (MUTHER)                  | 4.49E-06          | 15  | 72864420             | ILMN_1761262       | MPI                 | cis                         |       |        |                  |                |
| rs11072518 | SBP/MAP | NA        | SCAMP5;COX5A;RPP25;C15orf17;MPI | 12     | LDproxy(CEU-H3)   | 0.733                   | rs1378942  | Lung                          | 3.02E-05          | 15  | 72864420             | 100132373_TGI_CSK  | CSK                 | cis                         |       |        |                  |                |
| rs11072518 | SBP/MAP | NA        | SCAMP5;COX5A;RPP25;C15orf17;MPI | 12     | LDproxy(CEU-H3)   | 0.733                   | rs1378942  | Blood(Fehrmann et al)         | 2.00E-45;3.20E-45 | 15  | 72864420             | 3170239;4480132    | CSK;ULK3;COX5A      | cis                         |       |        |                  |                |
| rs11072518 | SBP/MAP | NA        | SCAMP5;COX5A;RPP25;C15orf17;MPI | 12     | LDproxy(CEU-1kg)  | 0.719                   | rs12591513 | LCL in asthmatics (Liang 1kg) | 1.92E-22          | 15  | 72889767             | 202472_at          | MPI                 | cis                         |       |        |                  |                |
| rs11072518 | SBP/MAP | NA        | SCAMP5;COX5A;RPP25;C15orf17;MPI | 12     | LDproxy(CEU-Rel2) | 0.701                   | rs4886606  | Whole blood (CHARGE)          | 6.50E-29          | 15  | 72844800             | 4480132            | ULK3                | cis                         | 11.16 | A      | 15               | 72915933       |
| rs11072518 | SBP/MAP | NA        | SCAMP5;COX5A;RPP25;C15orf17;MPI | 12     | LDproxy(CEU-Rel2) | 0.701                   | rs4886606  | Skin (MUTHER)                 | 7.34E-08          | 15  | 72844800             | ILMN_1679495       | ULK3                | cis                         |       |        |                  |                |



| IndexSNP   | Traits  | InRefGene | RefGenes60kb                    | Locus# | Index/LD status         | r <sup>2</sup> to index | eSNPid     | Tissue                              | eSNP P value      | Chr | B36pos   | ArrayID         | Transcript        | type of eQTL (cis or trans) | Beta  | Allele | Probe Chromosome | Probe Position |
|------------|---------|-----------|---------------------------------|--------|-------------------------|-------------------------|------------|-------------------------------------|-------------------|-----|----------|-----------------|-------------------|-----------------------------|-------|--------|------------------|----------------|
| rs11072518 | SBP/MAP | NA        | SCAMP5;COX5A;RPP25;C15orf17;MPI | 12     | LDproxy(CEU-Rel): 0.701 |                         | rs4886606  | Subc adipose (MuTHER)               | 8.91E-08          | 15  | 72844800 | ILMN_1679495    | ULK3              | cis                         |       |        |                  |                |
| rs11072518 | SBP/MAP | NA        | SCAMP5;COX5A;RPP25;C15orf17;MPI | 12     | LDproxy(CEU-Rel): 0.701 |                         | rs4886606  | LCL (MuTHER)                        | 6.38E-06          | 15  | 72844800 | ILMN_1761262    | MPI               | cis                         |       |        |                  |                |
| rs1133323  | DBP     | NA        | COX5A;SCAMP2;RPP25;C15orf17;MPI | 13     | IndexSNP                |                         | rs1133323  | Monocytes                           | 8.25E-26          | 15  | 72999278 |                 | ULK3              | cis                         |       |        |                  |                |
| rs1133323  | DBP     | NA        | COX5A;SCAMP2;RPP25;C15orf17;MPI | 13     | IndexSNP                |                         | rs1133323  | Whole blood (CHARGE)                | 5.97E-21          | 15  | 72999278 | 4480132         | ULK3              | cis                         | -9.39 | T      | 15               | 72915933       |
| rs1133323  | DBP     | NA        | COX5A;SCAMP2;RPP25;C15orf17;MPI | 13     | IndexSNP                |                         | rs1133323  | LCL (MuTHER)                        | 3.18E-08          | 15  | 72999278 | ILMN_1761262    | MPI               | cis                         |       |        |                  |                |
| rs1133323  | DBP     | NA        | COX5A;SCAMP2;RPP25;C15orf17;MPI | 13     | IndexSNP                |                         | rs1133323  | Skin (MuTHER)                       | 1.30E-05          | 15  | 72999278 | ILMN_1679495    | ULK3              | cis                         |       |        |                  |                |
| rs1133323  | DBP     | NA        | COX5A;SCAMP2;RPP25;C15orf17;MPI | 13     | IndexSNP                |                         | rs1133323  | Subc adipose (MuTHER)               | 2.40E-05          | 15  | 72999278 | ILMN_2364535    | SNUPN             | cis                         |       |        |                  |                |
| rs1133323  | DBP     | NA        | COX5A;SCAMP2;RPP25;C15orf17;MPI | 13     | IndexSNP                |                         | rs1133323  | Bcells (CD19+)                      | 3.86E-05          | 15  | 72999278 | ubt12t1w7_Z_FO  | CSK               | cis                         |       |        |                  |                |
| rs1133323  | DBP     | NA        | COX5A;SCAMP2;RPP25;C15orf17;MPI | 13     | LDproxy(CEU-1kg)        | 1                       | rs11638130 | Whole blood (Battle)                | 7.31E-79          | 15  | 75183935 |                 | SCAMP2            | cis                         |       |        |                  |                |
| rs1133323  | DBP     | NA        | COX5A;SCAMP2;RPP25;C15orf17;MPI | 13     | LDproxy(CEU-Rel): 1     |                         | rs1133323  | Monocytes                           | 8.85E-27          | 15  | 72999410 |                 | ULK3              | cis                         |       |        |                  |                |
| rs1133323  | DBP     | NA        | COX5A;SCAMP2;RPP25;C15orf17;MPI | 13     | LDproxy(CEU-1kg)        | 1                       | rs11857695 | LCL in asthmatics (Liang 1kg)       | 3.41E-21          | 15  | 72952804 | 218143_s_at     | SCAMP2            | cis                         |       |        |                  |                |
| rs1133323  | DBP     | NA        | COX5A;SCAMP2;RPP25;C15orf17;MPI | 13     | LDproxy(CEU-1kg)        | 1                       | rs12911254 | LCL in asthmatics (Liang 1kg)       | 3.41E-21          | 15  | 72953388 | 218143_s_at     | SCAMP2            | cis                         |       |        |                  |                |
| rs1133323  | DBP     | NA        | COX5A;SCAMP2;RPP25;C15orf17;MPI | 13     | LDproxy(CEU-1kg)        | 1                       | rs11638130 | LCL in asthmatics (Liang 1kg)       | 5.92E-21          | 15  | 72970988 | 218143_s_at     | SCAMP2            | cis                         |       |        |                  |                |
| rs1133323  | DBP     | NA        | COX5A;SCAMP2;RPP25;C15orf17;MPI | 13     | LDproxy(CEU-1kg)        | 1                       | rs11633472 | LCL in asthmatics (Liang 1kg)       | 5.99E-21          | 15  | 72971137 | 218143_s_at     | SCAMP2            | cis                         |       |        |                  |                |
| rs1133323  | DBP     | NA        | COX5A;SCAMP2;RPP25;C15orf17;MPI | 13     | LDproxy(CEU-Rel): 1     |                         | rs1133323  | Whole blood (CHARGE)                | 6.01E-21          | 15  | 72999410 | 4480132         | ULK3              | cis                         | -9.39 | G      | 15               | 72915933       |
| rs1133323  | DBP     | NA        | COX5A;SCAMP2;RPP25;C15orf17;MPI | 13     | LDproxy(CEU-Rel): 1     |                         | rs11072513 | Whole blood (CHARGE)                | 6.51E-21          | 15  | 73008021 | 4480132         | ULK3              | cis                         | -9.38 | T      | 15               | 72915933       |
| rs1133323  | DBP     | NA        | COX5A;SCAMP2;RPP25;C15orf17;MPI | 13     | LDproxy(CEU-1kg)        | 1                       | rs11072514 | Whole blood (CHARGE)                | 7.20E-21          | 15  | 73008918 | 4480132         | ULK3              | cis                         | -9.37 | A      | 15               | 72915933       |
| rs1133323  | DBP     | NA        | COX5A;SCAMP2;RPP25;C15orf17;MPI | 13     | LDproxy(CEU-H3)         | 1                       | rs12909935 | LCL in asthmatics (Liang 1kg)       | 2.70E-20          | 15  | 73001842 | 218143_s_at     | SCAMP2            | cis                         |       |        |                  |                |
| rs1133323  | DBP     | NA        | COX5A;SCAMP2;RPP25;C15orf17;MPI | 13     | LDproxy(CEU-Rel): 1     |                         | rs11072513 | LCL in asthmatics (Liang 1kg)       | 4.20E-20          | 15  | 73008021 | 218143_s_at     | SCAMP2            | cis                         |       |        |                  |                |
| rs1133323  | DBP     | NA        | COX5A;SCAMP2;RPP25;C15orf17;MPI | 13     | LDproxy(CEU-1kg)        | 1                       | rs12912839 | LCL in asthmatics (Liang 1kg)       | 1.09E-19          | 15  | 73008298 | 218143_s_at     | SCAMP2            | cis                         |       |        |                  |                |
| rs1133323  | DBP     | NA        | COX5A;SCAMP2;RPP25;C15orf17;MPI | 13     | LDproxy(CEU-1kg)        | 1                       | rs11072514 | LCL in asthmatics (Liang 1kg)       | 1.10E-19          | 15  | 73008918 | 218143_s_at     | SCAMP2            | cis                         |       |        |                  |                |
| rs1133323  | DBP     | NA        | COX5A;SCAMP2;RPP25;C15orf17;MPI | 13     | LDproxy(CEU-1kg)        | 1                       | rs62092167 | LCL in asthmatics (Liang 1kg)       | 2.14E-19          | 15  | 73015403 | 218143_s_at     | SCAMP2            | cis                         |       |        |                  |                |
| rs1133323  | DBP     | NA        | COX5A;SCAMP2;RPP25;C15orf17;MPI | 13     | LDproxy(CEU-1kg)        | 1                       | rs12901190 | LCL in asthmatics (Liang 1kg)       | 4.25E-19          | 15  | 73018505 | 218143_s_at     | SCAMP2            | cis                         |       |        |                  |                |
| rs1133323  | DBP     | NA        | COX5A;SCAMP2;RPP25;C15orf17;MPI | 13     | LDproxy(CEU-Rel): 1     |                         | rs1133322  | Hippocampus (CA1, n=61; Kim et al.) | 5.88E-11          | 15  | 75212357 | 229426          | COX5A             | cis                         | 0.00  |        |                  |                |
| rs1133323  | DBP     | NA        | COX5A;SCAMP2;RPP25;C15orf17;MPI | 13     | LDproxy(CEU-Rel): 1     |                         | rs1133322  | LCL (MuTHER)                        | 3.12E-09          | 15  | 72999410 | ILMN_1761262    | MPI               | cis                         |       |        |                  |                |
| rs1133323  | DBP     | NA        | COX5A;SCAMP2;RPP25;C15orf17;MPI | 13     | LDproxy(CEU-Rel): 1     |                         | rs11072513 | LCL (MuTHER)                        | 2.97E-08          | 15  | 73008021 | ILMN_1761262    | MPI               | cis                         |       |        |                  |                |
| rs1133323  | DBP     | NA        | COX5A;SCAMP2;RPP25;C15orf17;MPI | 13     | LDproxy(CEU-1kg)        | 1                       | rs11072514 | LCL (MuTHER)                        | 3.03E-08          | 15  | 73008918 | ILMN_1761262    | MPI               | cis                         |       |        |                  |                |
| rs1133323  | DBP     | NA        | COX5A;SCAMP2;RPP25;C15orf17;MPI | 13     | LDproxy(CEU-1kg)        | 1                       | rs11072514 | Skin (MuTHER)                       | 1.37E-05          | 15  | 73008918 | ILMN_1679495    | ULK3              | cis                         |       |        |                  |                |
| rs1133323  | DBP     | NA        | COX5A;SCAMP2;RPP25;C15orf17;MPI | 13     | LDproxy(CEU-Rel): 1     |                         | rs11072513 | Skin (MuTHER)                       | 1.39E-05          | 15  | 73008021 | ILMN_1679495    | ULK3              | cis                         |       |        |                  |                |
| rs1133323  | DBP     | NA        | COX5A;SCAMP2;RPP25;C15orf17;MPI | 13     | LDproxy(CEU-Rel): 1     |                         | rs11072513 | Subc adipose (MuTHER)               | 1.98E-05          | 15  | 73008021 | ILMN_2364535    | SNUPN             | cis                         |       |        |                  |                |
| rs1133323  | DBP     | NA        | COX5A;SCAMP2;RPP25;C15orf17;MPI | 13     | LDproxy(CEU-1kg)        | 1                       | rs11072514 | Subc adipose (MuTHER)               | 2.04E-05          | 15  | 73008918 | ILMN_2364535    | SNUPN             | cis                         |       |        |                  |                |
| rs1133323  | DBP     | NA        | COX5A;SCAMP2;RPP25;C15orf17;MPI | 13     | LDproxy(CEU-Rel): 1     |                         | rs1133322  | Subc adipose (MuTHER)               | 2.19E-05          | 15  | 72999410 | ILMN_1679495    | ULK3              | cis                         |       |        |                  |                |
| rs1133323  | DBP     | NA        | COX5A;SCAMP2;RPP25;C15orf17;MPI | 13     | LDproxy(CEU-Rel): 1     |                         | rs1133322  | Skin (MuTHER)                       | 3.02E-05          | 15  | 72999410 | ILMN_1679495    | ULK3              | cis                         |       |        |                  |                |
| rs1133323  | DBP     | NA        | COX5A;SCAMP2;RPP25;C15orf17;MPI | 13     | LDproxy(CEU-Rel): 1     |                         | rs1133322  | Bcells (CD19+)                      | 3.21E-05          | 15  | 72999410 | ubt12t1w7_Z_FO  | CSK               | cis                         |       |        |                  |                |
| rs1133323  | DBP     | NA        | COX5A;SCAMP2;RPP25;C15orf17;MPI | 13     | LDproxy(CEU-1kg)        | 1                       | rs11633472 | Bcells (CD19+)                      | 3.86E-05          | 15  | 72971137 | ubt12t1w7_Z_FO  | CSK               | cis                         |       |        |                  |                |
| rs1133323  | DBP     | NA        | COX5A;SCAMP2;RPP25;C15orf17;MPI | 13     | LDproxy(CEU-1kg)        | 1                       | rs11638130 | Bcells (CD19+)                      | 3.86E-05          | 15  | 72970988 | ubt12t1w7_Z_FO  | CSK               | cis                         |       |        |                  |                |
| rs1133323  | DBP     | NA        | COX5A;SCAMP2;RPP25;C15orf17;MPI | 13     | LDproxy(CEU-Rel): 1     |                         | rs1133322  | Monocytes (CD14+)                   | 0.0001945         | 15  | 72999410 | r_tdn3VF1v3q    | ULK3              | cis                         |       |        |                  |                |
| rs1133323  | DBP     | NA        | COX5A;SCAMP2;RPP25;C15orf17;MPI | 13     | LDproxy(CEU-H3)         | 0.982                   | rs11856413 | LCL in asthmatics (Liang 1kg)       | 1.02E-20          | 15  | 72986945 | 218143_s_at     | SCAMP2            | cis                         |       |        |                  |                |
| rs1133323  | DBP     | NA        | COX5A;SCAMP2;RPP25;C15orf17;MPI | 13     | LDproxy(CEU-H3)         | 0.982                   | rs11856413 | Whole blood (CHARGE)                | 3.32E-20          | 15  | 72986945 | 4480132         | ULK3              | cis                         | -9.21 | G      | 15               | 72915933       |
| rs1133323  | DBP     | NA        | COX5A;SCAMP2;RPP25;C15orf17;MPI | 13     | LDproxy(CEU-H3)         | 0.982                   | rs11856413 | Liver (Greenawalt)                  | 1.34E-18          | 15  | 72986945 | 10023814330     | MPI               | cis                         |       |        |                  |                |
| rs1133323  | DBP     | NA        | COX5A;SCAMP2;RPP25;C15orf17;MPI | 13     | LDproxy(CEU-H3)         | 0.982                   | rs11856413 | LCL (MuTHER)                        | 3.91E-08          | 15  | 72986945 | ILMN_1761262    | MPI               | cis                         |       |        |                  |                |
| rs1133323  | DBP     | NA        | COX5A;SCAMP2;RPP25;C15orf17;MPI | 13     | LDproxy(CEU-H3)         | 0.982                   | rs11856413 | Lymph                               | 4.27E-06          | 15  | 72986945 | G1_4505234-5    | MPI               | cis                         |       |        |                  |                |
| rs1133323  | DBP     | NA        | COX5A;SCAMP2;RPP25;C15orf17;MPI | 13     | LDproxy(CEU-H3)         | 0.982                   | rs11856413 | Skin (MuTHER)                       | 1.33E-05          | 15  | 72986945 | ILMN_1679495    | ULK3              | cis                         |       |        |                  |                |
| rs1133323  | DBP     | NA        | COX5A;SCAMP2;RPP25;C15orf17;MPI | 13     | LDproxy(CEU-H3)         | 0.982                   | rs11856413 | Prefrontal cortex (all samples)     | 1.3997E-05        | 15  | 72986945 | 10026392220     | SCAMP2            | cis                         |       |        |                  |                |
| rs1133323  | DBP     | NA        | COX5A;SCAMP2;RPP25;C15orf17;MPI | 13     | LDproxy(CEU-H3)         | 0.982                   | rs11856413 | Subc adipose (MuTHER)               | 3.12E-05          | 15  | 72986945 | ILMN_2364535    | SNUPN             | cis                         |       |        |                  |                |
| rs1133323  | DBP     | NA        | COX5A;SCAMP2;RPP25;C15orf17;MPI | 13     | LDproxy(CEU-H3)         | 0.982                   | rs11856413 | Bcells (CD19+)                      | 3.86E-05          | 15  | 72986945 | ubt12t1w7_Z_FO  | CSK               | cis                         |       |        |                  |                |
| rs1133323  | DBP     | NA        | COX5A;SCAMP2;RPP25;C15orf17;MPI | 13     | LDproxy(CEU-H3)         | 0.982                   | rs11856413 | Induced sputum (COPD cases)         | 0.00015722        | 15  | 72986945 | 224805_s_at     | C15orf17          | cis                         |       |        |                  |                |
| rs1133323  | DBP     | NA        | COX5A;SCAMP2;RPP25;C15orf17;MPI | 13     | LDproxy(CEU-H3)         | 0.982                   | rs11856413 | Blood (Fehrmann et al)              | 2.20E-21,2.20E-21 | 15  | 72986945 | 3170239;50341;4 | CSK;SCAMP2;ULK3;C | cis                         |       |        |                  |                |
| rs1133323  | DBP     | NA        | COX5A;SCAMP2;RPP25;C15orf17;MPI | 13     | LDproxy(CEU-Rel): 0.967 |                         | rs1137041  | Whole blood (Battle)                | 4.09E-124         | 15  | 75189930 |                 | MPI               | cis                         |       |        |                  |                |
| rs1133323  | DBP     | NA        | COX5A;SCAMP2;RPP25;C15orf17;MPI | 13     | LDproxy(CEU-Rel): 0.967 |                         | rs7495739  | Monocytes                           | 3.25E-29          | 15  | 72972723 |                 | ULK3              | cis                         |       |        |                  |                |
| rs1133323  | DBP     | NA        | COX5A;SCAMP2;RPP25;C15orf17;MPI | 13     | LDproxy(CEU-Rel): 0.967 |                         | rs7495739  | LCL in asthmatics (Liang 1kg)       | 5.96E-29          | 15  | 72972723 | 202472_at       | MPI               | cis                         |       |        |                  |                |
| rs1133323  | DBP     | NA        | COX5A;SCAMP2;RPP25;C15orf17;MPI | 13     | LDproxy(CEU-Rel): 0.967 |                         | rs1137041  | LCL in asthmatics (Liang 1kg)       | 1.45E-28          | 15  | 72976983 | 202472_at       | MPI               | cis                         |       |        |                  |                |
| rs1133323  | DBP     | NA        | COX5A;SCAMP2;RPP25;C15orf17;MPI | 13     | LDproxy(CEU-Rel): 0.967 |                         | rs11072512 | LCL in asthmatics (Liang 1kg)       | 3.40E-28          | 15  | 72951079 | 202472_at       | MPI               | cis                         |       |        |                  |                |
| rs1133323  | DBP     | NA        | COX5A;SCAMP2;RPP25;C15orf17;MPI | 13     | LDproxy(CEU-Rel): 0.967 |                         | rs4886636  | LCL in asthmatics (Liang 1kg)       | 3.40E-28          | 15  | 72983229 | 202472_at       | MPI               | cis                         |       |        |                  |                |
| rs1133323  | DBP     | NA        | COX5A;SCAMP2;RPP25;C15orf17;MPI | 13     | LDproxy(CEU-Rel): 0.967 |                         | rs1127796  | Monocytes                           | 6.08E-27          | 15  | 72980057 |                 | ULK3              | cis                         |       |        |                  |                |
| rs1133323  | DBP     | NA        | COX5A;SCAMP2;RPP25;C15orf17;MPI | 13     | LDproxy(CEU-Rel): 0.967 |                         | rs4886636  | Whole blood (CHARGE)                | 1.49E-22          | 15  | 72983229 | 4480132         | ULK3              | cis                         | -9.77 | A      | 15               | 72915933       |
| rs1133323  | DBP     | NA        | COX5A;SCAMP2;RPP25;C15orf17;MPI | 13     | LDproxy(CEU-Rel): 0.967 |                         | rs1137041  | Whole blood (CHARGE)                | 5.14E-22          | 15  | 72976983 | 4480132         | ULK3              | cis                         | -9.65 | G      | 15               | 72915933       |
| rs1133323  | DBP     | NA        | COX5A;SCAMP2;RPP25;C15orf17;MPI | 13     | LDproxy(CEU-Rel): 0.967 |                         | rs7495739  | Whole blood (CHARGE)                | 5.40E-22          | 15  | 72972723 | 4480132         | ULK3              | cis                         | -9.64 | G      | 15               | 72915933       |
| rs113      |         |           |                                 |        |                         |                         |            |                                     |                   |     |          |                 |                   |                             |       |        |                  |                |

| IndexSNP  | Traits | InRefGene | RefGenes60kb                    | Locus# | Index/LD status         | r <sup>2</sup> to index | eSNPid                            | Tissue                        | eSNP P value     | Chr | B36pos   | ArrayID                           | Transcript | type of eQTL (cis or trans) | Beta  | Allele | Probe Chromosome | Probe Position |
|-----------|--------|-----------|---------------------------------|--------|-------------------------|-------------------------|-----------------------------------|-------------------------------|------------------|-----|----------|-----------------------------------|------------|-----------------------------|-------|--------|------------------|----------------|
| rs1133323 | DBP    | NA        | COX5A;SCAMP2;RPP25;C15orf17;MPI | 13     | LDproxy(CEU-Rel): 0.967 | rs1127796               | Whole blood (CHARGE)              |                               | 1.00E-21         | 15  | 72980057 | 4480132                           | ULK3       | cis                         | -9.58 | C      | 15               | 72915933       |
| rs1133323 | DBP    | NA        | COX5A;SCAMP2;RPP25;C15orf17;MPI | 13     | LDproxy(CEU-Rel): 0.967 | rs11072511              | Whole blood (CHARGE)              |                               | 1.61E-21         | 15  | 72946486 | 4480132                           | ULK3       | cis                         | -9.53 | G      | 15               | 72915933       |
| rs1133323 | DBP    | NA        | COX5A;SCAMP2;RPP25;C15orf17;MPI | 13     | LDproxy(CEU-Rel): 0.967 | rs7497393               | LCL in asthmatics (Liang 1kg)     |                               | 3.92E-21         | 15  | 72999278 | 218143_s_at                       | SCAMP2     | cis                         |       |        |                  |                |
| rs1133323 | DBP    | NA        | COX5A;SCAMP2;RPP25;C15orf17;MPI | 13     | LDproxy(CEU-Rel): 0.967 | rs11072511              | Whole blood (CHARGE)              |                               | 7.79E-21         | 15  | 72991079 | 4480132                           | ULK3       | cis                         | -9.36 | T      | 15               | 72915933       |
| rs1133323 | DBP    | NA        | COX5A;SCAMP2;RPP25;C15orf17;MPI | 13     | LDproxy(CEU-Rel): 0.967 | rs11072511              | LCL in asthmatics (Liang 1kg)     |                               | 5.64E-20         | 15  | 72946486 | 218143_s_at                       | SCAMP2     | cis                         |       |        |                  |                |
| rs1133323 | DBP    | NA        | COX5A;SCAMP2;RPP25;C15orf17;MPI | 13     | LDproxy(CEU-Rel): 0.967 | rs4886636               | SubCutAdipose(Greenawalt)         |                               | 7.68E-11         | 15  | 72983229 | 10023814330                       | MPI        | cis                         |       |        |                  |                |
| rs1133323 | DBP    | NA        | COX5A;SCAMP2;RPP25;C15orf17;MPI | 13     | LDproxy(CEU-Rel): 0.967 | rs4886636               | LCL (MuTHER)                      |                               | 3.00E-09         | 15  | 72983229 | ILMN_1761262                      | MPI        | cis                         |       |        |                  |                |
| rs1133323 | DBP    | NA        | COX5A;SCAMP2;RPP25;C15orf17;MPI | 13     | LDproxy(CEU-Rel): 0.967 | rs11072511              | LCL (MuTHER)                      |                               | 3.10E-09         | 15  | 72991079 | ILMN_1761262                      | MPI        | cis                         |       |        |                  |                |
| rs1133323 | DBP    | NA        | COX5A;SCAMP2;RPP25;C15orf17;MPI | 13     | LDproxy(CEU-Rel): 0.967 | rs1127796               | LCL (MuTHER)                      |                               | 4.61E-09         | 15  | 72980057 | ILMN_1761262                      | MPI        | cis                         |       |        |                  |                |
| rs1133323 | DBP    | NA        | COX5A;SCAMP2;RPP25;C15orf17;MPI | 13     | LDproxy(CEU-Rel): 0.967 | rs1130741               | LCL (MuTHER)                      |                               | 4.89E-09         | 15  | 72976983 | ILMN_1761262                      | MPI        | cis                         |       |        |                  |                |
| rs1133323 | DBP    | NA        | COX5A;SCAMP2;RPP25;C15orf17;MPI | 13     | LDproxy(CEU-Rel): 0.967 | rs7495739               | LCL (MuTHER)                      |                               | 5.54E-09         | 15  | 72972723 | ILMN_1761262                      | MPI        | cis                         |       |        |                  |                |
| rs1133323 | DBP    | NA        | COX5A;SCAMP2;RPP25;C15orf17;MPI | 13     | LDproxy(CEU-Rel): 0.967 | rs11072511              | LCL (MuTHER)                      |                               | 6.47E-09         | 15  | 72946486 | ILMN_1761262                      | MPI        | cis                         |       |        |                  |                |
| rs1133323 | DBP    | NA        | COX5A;SCAMP2;RPP25;C15orf17;MPI | 13     | LDproxy(CEU-Rel): 0.967 | rs7497393               | LCL (MuTHER)                      |                               | 8.74E-08         | 15  | 72962510 | ILMN_1761262                      | MPI        | cis                         |       |        |                  |                |
| rs1133323 | DBP    | NA        | COX5A;SCAMP2;RPP25;C15orf17;MPI | 13     | LDproxy(CEU-Rel): 0.967 | rs7495739               | RNAseq(HapMapLCL)+DeepSage(blood) |                               | 2.76E-07         | 15  | 75185670 | ENST0000037969                    | MPI        | cis                         |       |        |                  |                |
| rs1133323 | DBP    | NA        | COX5A;SCAMP2;RPP25;C15orf17;MPI | 13     | LDproxy(CEU-Rel): 0.967 | rs7497393               | Subc adipose (MuTHER)             |                               | 1.49E-05         | 15  | 72962510 | ILMN_2364535                      | SNUPN      | cis                         |       |        |                  |                |
| rs1133323 | DBP    | NA        | COX5A;SCAMP2;RPP25;C15orf17;MPI | 13     | LDproxy(CEU-Rel): 0.967 | rs11072511              | Subc adipose (MuTHER)             |                               | 1.53E-05         | 15  | 72946486 | ILMN_1679495                      | ULK3       | cis                         |       |        |                  |                |
| rs1133323 | DBP    | NA        | COX5A;SCAMP2;RPP25;C15orf17;MPI | 13     | LDproxy(CEU-Rel): 0.967 | rs4886636               | Subc adipose (MuTHER)             |                               | 1.94E-05         | 15  | 72983229 | ILMN_1679495                      | ULK3       | cis                         |       |        |                  |                |
| rs1133323 | DBP    | NA        | COX5A;SCAMP2;RPP25;C15orf17;MPI | 13     | LDproxy(CEU-Rel): 0.967 | rs7495739               | Subc adipose (MuTHER)             |                               | 2.20E-05         | 15  | 72972723 | ILMN_1679495                      | ULK3       | cis                         |       |        |                  |                |
| rs1133323 | DBP    | NA        | COX5A;SCAMP2;RPP25;C15orf17;MPI | 13     | LDproxy(CEU-Rel): 0.967 | rs1130741               | Subc adipose (MuTHER)             |                               | 2.25E-05         | 15  | 72976983 | ILMN_1679495                      | ULK3       | cis                         |       |        |                  |                |
| rs1133323 | DBP    | NA        | COX5A;SCAMP2;RPP25;C15orf17;MPI | 13     | LDproxy(CEU-Rel): 0.967 | rs7497393               | Skin (MuTHER)                     |                               | 2.44E-05         | 15  | 72962510 | ILMN_1679495                      | ULK3       | cis                         |       |        |                  |                |
| rs1133323 | DBP    | NA        | COX5A;SCAMP2;RPP25;C15orf17;MPI | 13     | LDproxy(CEU-Rel): 0.967 | rs1127796               | Subc adipose (MuTHER)             |                               | 2.49E-05         | 15  | 72980057 | ILMN_1679495                      | ULK3       | cis                         |       |        |                  |                |
| rs1133323 | DBP    | NA        | COX5A;SCAMP2;RPP25;C15orf17;MPI | 13     | LDproxy(CEU-Rel): 0.967 | rs4886636               | Induced sputum (COPD cases)       |                               | 2.56E-05         | 15  | 72983229 | 224805_s_at                       | C15orf17   | cis                         |       |        |                  |                |
| rs1133323 | DBP    | NA        | COX5A;SCAMP2;RPP25;C15orf17;MPI | 13     | LDproxy(CEU-Rel): 0.967 | rs11072511              | Subc adipose (MuTHER)             |                               | 2.61E-05         | 15  | 72991079 | ILMN_1679495                      | ULK3       | cis                         |       |        |                  |                |
| rs1133323 | DBP    | NA        | COX5A;SCAMP2;RPP25;C15orf17;MPI | 13     | LDproxy(CEU-Rel): 0.967 | rs11072511              | Skin (MuTHER)                     |                               | 3.01E-05         | 15  | 72991079 | ILMN_1679495                      | ULK3       | cis                         |       |        |                  |                |
| rs1133323 | DBP    | NA        | COX5A;SCAMP2;RPP25;C15orf17;MPI | 13     | LDproxy(CEU-Rel): 0.967 | rs11072511              | Bcells (CD19+)                    |                               | 3.21E-05         | 15  | 72991079 | ubt12t1w7_Z_FO_CSK                | cis        |                             |       |        |                  |                |
| rs1133323 | DBP    | NA        | COX5A;SCAMP2;RPP25;C15orf17;MPI | 13     | LDproxy(CEU-Rel): 0.967 | rs1127796               | Bcells (CD19+)                    |                               | 3.21E-05         | 15  | 72980057 | ubt12t1w7_Z_FO_CSK                | cis        |                             |       |        |                  |                |
| rs1133323 | DBP    | NA        | COX5A;SCAMP2;RPP25;C15orf17;MPI | 13     | LDproxy(CEU-Rel): 0.967 | rs4886636               | Bcells (CD19+)                    |                               | 3.35E-05         | 15  | 72983229 | ubt12t1w7_Z_FO_CSK                | cis        |                             |       |        |                  |                |
| rs1133323 | DBP    | NA        | COX5A;SCAMP2;RPP25;C15orf17;MPI | 13     | LDproxy(CEU-Rel): 0.967 | rs1130741               | Bcells (CD19+)                    |                               | 4.67E-05         | 15  | 72976983 | ubt12t1w7_Z_FO_CSK                | cis        |                             |       |        |                  |                |
| rs1133323 | DBP    | NA        | COX5A;SCAMP2;RPP25;C15orf17;MPI | 13     | LDproxy(CEU-Rel): 0.967 | rs4886636               | Monocytes (CD14+)                 |                               | 0.000135         | 15  | 72983229 | r_tdn3Vf1v3q\ULK3                 | cis        |                             |       |        |                  |                |
| rs1133323 | DBP    | NA        | COX5A;SCAMP2;RPP25;C15orf17;MPI | 13     | LDproxy(CEU-Rel): 0.967 | rs11072511              | Bcells (CD19+)                    |                               | 0.0001942        | 15  | 72946486 | ubt12t1w7_Z_FO_CSK                | cis        |                             |       |        |                  |                |
| rs1133323 | DBP    | NA        | COX5A;SCAMP2;RPP25;C15orf17;MPI | 13     | LDproxy(CEU-Rel): 0.967 | rs11072511              | Monocytes (CD14+)                 |                               | 0.0001945        | 15  | 72991079 | r_tdn3Vf1v3q\ULK3                 | cis        |                             |       |        |                  |                |
| rs1133323 | DBP    | NA        | COX5A;SCAMP2;RPP25;C15orf17;MPI | 13     | LDproxy(CEU-Rel): 0.967 | rs1127796               | Monocytes (CD14+)                 |                               | 0.0001945        | 15  | 72980057 | r_tdn3Vf1v3q\ULK3                 | cis        |                             |       |        |                  |                |
| rs1133323 | DBP    | NA        | COX5A;SCAMP2;RPP25;C15orf17;MPI | 13     | LDproxy(CEU-Rel): 0.967 | rs4886636               | Visual cortex (all samples)       |                               | 2.80E-04         | 15  | 72983229 | 10023814330                       | MPI        | cis                         |       |        |                  |                |
| rs1133323 | DBP    | NA        | COX5A;SCAMP2;RPP25;C15orf17;MPI | 13     | LDproxy(CEU-Rel): 0.967 | rs1130741               | Monocytes (CD14+)                 |                               | 0.0003045        | 15  | 72976983 | r_tdn3Vf1v3q\ULK3                 | cis        |                             |       |        |                  |                |
| rs1133323 | DBP    | NA        | COX5A;SCAMP2;RPP25;C15orf17;MPI | 13     | LDproxy(CEU-Rel): 0.967 | rs4886636               | Liver(UChicago)                   |                               | 0.000119825      | 15  | 72983229 | A_23_P60579;A_MPI;SCAMP2          | cis        |                             |       |        |                  |                |
| rs1133323 | DBP    | NA        | COX5A;SCAMP2;RPP25;C15orf17;MPI | 13     | LDproxy(CEU-Rel): 0.967 | rs4886636               | Blood(Fehrmann et al)             |                               | 1.60E-19;1.1E-11 | 15  | 72983229 | 3170239;50341;4_CSK;SCAMP2;ULK3;C | cis        |                             |       |        |                  |                |
| rs1133323 | DBP    | NA        | COX5A;SCAMP2;RPP25;C15orf17;MPI | 13     | LDproxy(CEU-1kg)        | 0.966                   | rs12902515                        | LCL in asthmatics (Liang 1kg) | 4.40E-20         | 15  | 72948051 | 218143_s_at                       | SCAMP2     | cis                         |       |        |                  |                |
| rs1133323 | DBP    | NA        | COX5A;SCAMP2;RPP25;C15orf17;MPI | 13     | LDproxy(CEU-1kg)        | 0.966                   | rs2415251                         | Whole blood (CHARGE)          | 1.49E-19         | 15  | 73029208 | 4480132                           | ULK3       | cis                         | -9.05 | C      | 15               | 72915933       |
| rs1133323 | DBP    | NA        | COX5A;SCAMP2;RPP25;C15orf17;MPI | 13     | LDproxy(CEU-1kg)        | 0.966                   | rs4886636                         | LCL in asthmatics (Liang 1kg) | 2.23E-19         | 15  | 73015708 | 218143_s_at                       | SCAMP2     | cis                         |       |        |                  |                |
| rs1133323 | DBP    | NA        | COX5A;SCAMP2;RPP25;C15orf17;MPI | 13     | LDproxy(CEU-1kg)        | 0.966                   | rs11639413                        | LCL in asthmatics (Liang 1kg) | 2.55E-19         | 15  | 73030347 | 218143_s_at                       | SCAMP2     | cis                         |       |        |                  |                |
| rs1133323 | DBP    | NA        | COX5A;SCAMP2;RPP25;C15orf17;MPI | 13     | LDproxy(CEU-1kg)        | 0.966                   | rs2415251                         | LCL in asthmatics (Liang 1kg) | 2.58E-19         | 15  | 73029208 | 218143_s_at                       | SCAMP2     | cis                         |       |        |                  |                |
| rs1133323 | DBP    | NA        | COX5A;SCAMP2;RPP25;C15orf17;MPI | 13     | LDproxy(CEU-1kg)        | 0.966                   | rs2415251                         | omental                       | 3.08E-19         | 15  | 73029208 | 10025911367                       | RPP25      | cis                         |       |        |                  |                |
| rs1133323 | DBP    | NA        | COX5A;SCAMP2;RPP25;C15orf17;MPI | 13     | LDproxy(CEU-1kg)        | 0.966                   | rs2415249                         | LCL in asthmatics (Liang 1kg) | 4.75E-19         | 15  | 73029093 | 218143_s_at                       | SCAMP2     | cis                         |       |        |                  |                |
| rs1133323 | DBP    | NA        | COX5A;SCAMP2;RPP25;C15orf17;MPI | 13     | LDproxy(CEU-1kg)        | 0.966                   | rs2415251                         | LCL (MuTHER)                  | 4.19E-08         | 15  | 73029208 | ILMN_1761262                      | MPI        | cis                         |       |        |                  |                |
| rs1133323 | DBP    | NA        | COX5A;SCAMP2;RPP25;C15orf17;MPI | 13     | LDproxy(CEU-1kg)        | 0.966                   | rs2415251                         | Subc adipose (MuTHER)         | 2.09E-05         | 15  | 73029208 | ILMN_2364535                      | SNUPN      | cis                         |       |        |                  |                |
| rs1133323 | DBP    | NA        | COX5A;SCAMP2;RPP25;C15orf17;MPI | 13     | LDproxy(CEU-1kg)        | 0.966                   | rs2415251                         | Skin (MuTHER)                 | 2.46E-05         | 15  | 73029208 | ILMN_1679495                      | ULK3       | cis                         |       |        |                  |                |
| rs1133323 | DBP    | NA        | COX5A;SCAMP2;RPP25;C15orf17;MPI | 13     | LDproxy(CEU-1kg)        | 0.966                   | rs2415251                         | Bcells (CD19+)                | 3.17E-05         | 15  | 73029208 | ubt12t1w7_Z_FO_CSK                | cis        |                             |       |        |                  |                |
| rs1133323 | DBP    | NA        | COX5A;SCAMP2;RPP25;C15orf17;MPI | 13     | LDproxy(CEU-H3)         | 0.965                   | rs11854704                        | LCL in asthmatics (Liang 1kg) | 4.96E-28         | 15  | 73008068 | 202472_at                         | MPI        | cis                         |       |        |                  |                |
| rs1133323 | DBP    | NA        | COX5A;SCAMP2;RPP25;C15orf17;MPI | 13     | LDproxy(CEU-H3)         | 0.965                   | rs11630918                        | Whole blood (CHARGE)          | 1.26E-22         | 15  | 72942949 | 4480132                           | ULK3       | cis                         | -9.79 | T      | 15               | 72915933       |
| rs1133323 | DBP    | NA        | COX5A;SCAMP2;RPP25;C15orf17;MPI | 13     | LDproxy(CEU-H3)         | 0.965                   | rs11630918                        | LCL in asthmatics (Liang 1kg) | 1.94E-20         | 15  | 72942949 | 218143_s_at                       | SCAMP2     | cis                         |       |        |                  |                |
| rs1133323 | DBP    | NA        | COX5A;SCAMP2;RPP25;C15orf17;MPI | 13     | LDproxy(CEU-H3)         | 0.965                   | rs11630918                        | LCL (MuTHER)                  | 6.46E-08         | 15  | 72942949 | ILMN_1761262                      | MPI        | cis                         |       |        |                  |                |
| rs1133323 | DBP    | NA        | COX5A;SCAMP2;RPP25;C15orf17;MPI | 13     | LDproxy(CEU-H3)         | 0.965                   | rs11630918                        | Lung                          | 2.86E-06         | 15  | 72942949 | 100161886_TG1_2                   | SCAMP2     | cis                         |       |        |                  |                |
| rs1133323 | DBP    | NA        | COX5A;SCAMP2;RPP25;C15orf17;MPI | 13     | LDproxy(CEU-H3)         | 0.965                   | rs11630918                        | Skin (MuTHER)                 | 4.23E-06         | 15  | 72942949 | ILMN_1679495                      | ULK3       | cis                         |       |        |                  |                |
| rs1133323 | DBP    | NA        | COX5A;SCAMP2;RPP25;C15orf17;MPI | 13     | LDproxy(CEU-H3)         | 0.965                   | rs11630918                        | Subc adipose (MuTHER)         | 3.77E-05         | 15  | 72942949 | ILMN_1679495                      | ULK3       | cis                         |       |        |                  |                |
| rs1133323 | DBP    | NA        | COX5A;SCAMP2;RPP25;C15orf17;MPI | 13     | LDproxy(CEU-H3)         | 0.965                   | rs11630918                        | Bcells (CD19+)                | 5.10E-05         | 15  | 72942949 | ubt12t1w7_Z_FO_CSK                | cis        |                             |       |        |                  |                |
| rs1133323 | DBP    | NA        | COX5A;SCAMP2;RPP25;C15orf17;MPI | 13     | LDproxy(CEU-1kg)        | 0.932                   | rs12913293                        | LCL in asthmatics (Liang 1kg) | 5.44E-29         | 15  | 72971511 | 202472_at                         | MPI        | cis                         |       |        |                  |                |
| rs1133323 | DBP    | NA        | COX5A;SCAMP2;RPP25;C15orf17;MPI | 13     | LDproxy(CEU-1kg)        | 0.932                   | rs8025447                         | LCL in asthmatics (Liang 1kg) | 1.59E-28         | 15  | 72979275 | 202472_at                         | MPI        | cis                         |       |        |                  |                |
| rs1133323 | DBP    | NA        | COX5A;SCAMP2;RPP25;C15orf17;MPI | 13     | LDproxy(CEU-1kg)        | 0.932                   | rs12907898                        | LCL in asthmatics (Liang 1kg) | 3.26E-28         | 15  | 72994925 | 202472_at                         | MPI        | cis                         |       |        |                  |                |
| rs1133323 | DBP    | NA        | COX5A;SCAMP2;RPP25;C15orf17;MPI | 13     | LDproxy(CEU-1kg)        | 0.932                   | rs12904897                        | LCL in asthmatics (Liang 1kg) | 3.85E-28         | 15  | 73004739 | 202472_at                         | MPI        | cis                         |       |        |                  |                |

| IndexSNP  | Traits     | InRefGene | RefGenes60kb                    | Locus# | Index/LD status   | r <sup>2</sup> to index | eSNPid     | Tissue                          | eSNP P value  | Chr | B36pos   | ArrayID         | Transcript        | type of eQTL (cis or trans) | Beta   | Allele | Probe Chromosome | Probe Position |
|-----------|------------|-----------|---------------------------------|--------|-------------------|-------------------------|------------|---------------------------------|---------------|-----|----------|-----------------|-------------------|-----------------------------|--------|--------|------------------|----------------|
| rs1133323 | DBP        | NA        | COX5A;SCAMP2;RPP25;C15orf17;MPI | 13     | LDproxy(CEU-1kg)  | 0.932                   | rs59945415 | LCL in asthmatics (Liang 1kg)   | 8.04E-28      | 15  | 73015480 | 202472_at       | MPI               | cis                         |        |        |                  |                |
| rs1133323 | DBP        | NA        | COX5A;SCAMP2;RPP25;C15orf17;MPI | 13     | LDproxy(CEU-H3)   | 0.931                   | rs12487    | Monocytes                       | 5.36E-26      | 15  | 72923747 |                 | ULK3              | cis                         |        |        |                  |                |
| rs1133323 | DBP        | NA        | COX5A;SCAMP2;RPP25;C15orf17;MPI | 13     | LDproxy(CEU-H3)   | 0.931                   | rs12487    | Whole blood (CHARGE)            | 3.69E-24      | 15  | 72923747 | 4480132         | ULK3              | cis                         | -10.14 | C      | 15               | 72915933       |
| rs1133323 | DBP        | NA        | COX5A;SCAMP2;RPP25;C15orf17;MPI | 13     | LDproxy(CEU-H3)   | 0.931                   | rs12487    | LCL in asthmatics (Liang 1kg)   | 9.19E-21      | 15  | 72923747 | 218143_s_at     | SCAMP2            | cis                         |        |        |                  |                |
| rs1133323 | DBP        | NA        | COX5A;SCAMP2;RPP25;C15orf17;MPI | 13     | LDproxy(CEU-H3)   | 0.931                   | rs12487    | LCL (MuTHER)                    | 2.37E-07      | 15  | 72923747 | ILMN_1761262    | MPI               | cis                         |        |        |                  |                |
| rs1133323 | DBP        | NA        | COX5A;SCAMP2;RPP25;C15orf17;MPI | 13     | LDproxy(CEU-H3)   | 0.931                   | rs12487    | Skin (MuTHER)                   | 3.95E-06      | 15  | 72923747 | ILMN_1679495    | ULK3              | cis                         |        |        |                  |                |
| rs1133323 | DBP        | NA        | COX5A;SCAMP2;RPP25;C15orf17;MPI | 13     | LDproxy(CEU-H3)   | 0.931                   | rs12487    | Subc adipose (MuTHER)           | 4.58E-05      | 15  | 72923747 | ILMN_1695271    | RPP25             | cis                         |        |        |                  |                |
| rs1133323 | DBP        | NA        | COX5A;SCAMP2;RPP25;C15orf17;MPI | 13     | LDproxy(CEU-1kg)  | 0.9                     | rs4480762  | LCL in asthmatics (Liang 1kg)   | 9.19E-21      | 15  | 72926479 | 218143_s_at     | SCAMP2            | cis                         |        |        |                  |                |
| rs1133323 | DBP        | NA        | COX5A;SCAMP2;RPP25;C15orf17;MPI | 13     | LDproxy(CEU-Rel2) | 0.873                   | rs6495122  | Whole blood (CHARGE)            | 3.44E-23      | 15  | 72912698 | 4480132         | ULK3              | cis                         | -9.92  | C      | 15               | 72915933       |
| rs1133323 | DBP        | NA        | COX5A;SCAMP2;RPP25;C15orf17;MPI | 13     | LDproxy(CEU-Rel2) | 0.873                   | rs6495122  | LCL in asthmatics (Liang 1kg)   | 4.34E-20      | 15  | 72912698 | 218143_s_at     | SCAMP2            | cis                         |        |        |                  |                |
| rs1133323 | DBP        | NA        | COX5A;SCAMP2;RPP25;C15orf17;MPI | 13     | LDproxy(CEU-Rel2) | 0.873                   | rs6495122  | Cerebellum (Alzheimer's)        | 7.49E-10      | 15  | 72912698 | 10025927424     | ULK3              | cis                         |        |        |                  |                |
| rs1133323 | DBP        | NA        | COX5A;SCAMP2;RPP25;C15orf17;MPI | 13     | LDproxy(CEU-Rel2) | 0.873                   | rs6495122  | Bcells (CD19+)                  | 3.92E-07      | 15  | 72912698 | ubt12t1w7_Z_FO  | CSK               | cis                         |        |        |                  |                |
| rs1133323 | DBP        | NA        | COX5A;SCAMP2;RPP25;C15orf17;MPI | 13     | LDproxy(CEU-Rel2) | 0.873                   | rs6495122  | Lymph                           | 4.47E-07      | 15  | 72912698 | GI_39930360-S   | ULK3              | cis                         |        |        |                  |                |
| rs1133323 | DBP        | NA        | COX5A;SCAMP2;RPP25;C15orf17;MPI | 13     | LDproxy(CEU-Rel2) | 0.873                   | rs6495122  | LCL (MuTHER)                    | 6.72E-07      | 15  | 72912698 | ILMN_1761262    | MPI               | cis                         |        |        |                  |                |
| rs1133323 | DBP        | NA        | COX5A;SCAMP2;RPP25;C15orf17;MPI | 13     | LDproxy(CEU-Rel2) | 0.873                   | rs6495122  | Skin (MuTHER)                   | 5.50E-06      | 15  | 72912698 | ILMN_1679495    | ULK3              | cis                         |        |        |                  |                |
| rs1133323 | DBP        | NA        | COX5A;SCAMP2;RPP25;C15orf17;MPI | 13     | LDproxy(CEU-Rel2) | 0.873                   | rs6495122  | Subc adipose (MuTHER)           | 3.13E-05      | 15  | 72912698 | ILMN_1695271    | RPP25             | cis                         |        |        |                  |                |
| rs1133323 | DBP        | NA        | COX5A;SCAMP2;RPP25;C15orf17;MPI | 13     | LDproxy(CEU-Rel2) | 0.873                   | rs6495122  | Monocytes (CD14+)               | 9.64E-05      | 15  | 72912698 | r_tdn3VF1vV3q\  | ULK3              | cis                         |        |        |                  |                |
| rs1133323 | DBP        | NA        | COX5A;SCAMP2;RPP25;C15orf17;MPI | 13     | LDproxy(CEU-Rel2) | 0.873                   | rs6495122  | Blood                           | 0.0002728     | 15  | 72912698 | HS600290189     | ARID3B            | cis                         |        |        |                  |                |
| rs1133323 | DBP        | NA        | COX5A;SCAMP2;RPP25;C15orf17;MPI | 13     | LDproxy(CEU-Rel2) | 0.873                   | rs6495122  | Lung                            | <2E-16        | 15  | 72912698 | 100312245_TGI_ε | RPP25             | cis                         |        |        |                  |                |
| rs1133323 | DBP        | NA        | COX5A;SCAMP2;RPP25;C15orf17;MPI | 13     | LDproxy(CEU-Rel2) | 0.873                   | rs6495122  | Blood(Fehrmann et al)           | 1.00E-25;1.5E | 15  | 72912698 | 3170239;4480132 | CSK;ULK3;SCAMP2;C | cis                         |        |        |                  |                |
| rs1133323 | DBP        | NA        | COX5A;SCAMP2;RPP25;C15orf17;MPI | 13     | LDproxy(CEU-1kg)  | 0.832                   | rs34063670 | LCL in asthmatics (Liang 1kg)   | 1.28E-18      | 15  | 73034209 | 218143_s_at     | SCAMP2            | cis                         |        |        |                  |                |
| rs1133323 | DBP        | NA        | COX5A;SCAMP2;RPP25;C15orf17;MPI | 13     | LDproxy(CEU-1kg)  | 0.832                   | rs11663692 | LCL in asthmatics (Liang 1kg)   | 2.81E-18      | 15  | 73053102 | 218143_s_at     | SCAMP2            | cis                         |        |        |                  |                |
| rs1133323 | DBP        | NA        | COX5A;SCAMP2;RPP25;C15orf17;MPI | 13     | LDproxy(CEU-1kg)  | 0.808                   | rs12917376 | LCL in asthmatics (Liang 1kg)   | 1.61E-22      | 15  | 72903220 | 202472_at       | MPI               | cis                         |        |        |                  |                |
| rs1133323 | DBP        | NA        | COX5A;SCAMP2;RPP25;C15orf17;MPI | 13     | LDproxy(CEU-1kg)  | 0.801                   | rs5638926  | LCL in asthmatics (Liang 1kg)   | 1.23E-18      | 15  | 73046388 | 218143_s_at     | SCAMP2            | cis                         |        |        |                  |                |
| rs1133323 | DBP        | NA        | COX5A;SCAMP2;RPP25;C15orf17;MPI | 13     | LDproxy(CEU-1kg)  | 0.801                   | rs3556055  | LCL in asthmatics (Liang 1kg)   | 2.88E-18      | 15  | 73040467 | 218143_s_at     | SCAMP2            | cis                         |        |        |                  |                |
| rs1133323 | DBP        | NA        | COX5A;SCAMP2;RPP25;C15orf17;MPI | 13     | LDproxy(CEU-1kg)  | 0.801                   | rs3556055  | Bcells (CD19+)                  | 0.0001316     | 15  | 73040467 | ubt12t1w7_Z_FO  | CSK               | cis                         |        |        |                  |                |
| rs1133323 | DBP        | NA        | COX5A;SCAMP2;RPP25;C15orf17;MPI | 13     | LDproxy(CEU-H3)   | 0.799                   | rs2290573  | Whole blood (CHARGE)            | 3.19E-20      | 15  | 72916647 | 4480132         | ULK3              | cis                         | -9.21  | A      | 15               | 72915933       |
| rs1133323 | DBP        | NA        | COX5A;SCAMP2;RPP25;C15orf17;MPI | 13     | LDproxy(CEU-H3)   | 0.799                   | rs2290573  | LCL in asthmatics (Liang 1kg)   | 3.77E-20      | 15  | 72916647 | 218143_s_at     | SCAMP2            | cis                         |        |        |                  |                |
| rs1133323 | DBP        | NA        | COX5A;SCAMP2;RPP25;C15orf17;MPI | 13     | LDproxy(CEU-H3)   | 0.799                   | rs2290573  | LCL (MuTHER)                    | 3.57E-07      | 15  | 72916647 | ILMN_1761262    | MPI               | cis                         |        |        |                  |                |
| rs1133323 | DBP        | NA        | COX5A;SCAMP2;RPP25;C15orf17;MPI | 13     | LDproxy(CEU-H3)   | 0.799                   | rs2290573  | Skin (MuTHER)                   | 8.85E-06      | 15  | 72916647 | ILMN_1679495    | ULK3              | cis                         |        |        |                  |                |
| rs1133323 | DBP        | NA        | COX5A;SCAMP2;RPP25;C15orf17;MPI | 13     | LDproxy(CEU-1kg)  | 0.798                   | rs11630087 | LCL in asthmatics (Liang 1kg)   | 1.82E-18      | 15  | 73048726 | 218143_s_at     | SCAMP2            | cis                         |        |        |                  |                |
| rs1133323 | DBP        | NA        | COX5A;SCAMP2;RPP25;C15orf17;MPI | 13     | LDproxy(CEU-1kg)  | 0.798                   | rs62029217 | LCL in asthmatics (Liang 1kg)   | 3.24E-18      | 15  | 73048952 | 218143_s_at     | SCAMP2            | cis                         |        |        |                  |                |
| rs1133323 | DBP        | NA        | COX5A;SCAMP2;RPP25;C15orf17;MPI | 13     | LDproxy(CEU-1kg)  | 0.771                   | rs12912343 | LCL in asthmatics (Liang 1kg)   | 1.30E-18      | 15  | 73038094 | 218143_s_at     | SCAMP2            | cis                         |        |        |                  |                |
| rs1133323 | DBP        | NA        | COX5A;SCAMP2;RPP25;C15orf17;MPI | 13     | LDproxy(CEU-1kg)  | 0.767                   | rs4886413  | LCL in asthmatics (Liang 1kg)   | 3.29E-18      | 15  | 73049363 | 218143_s_at     | SCAMP2            | cis                         |        |        |                  |                |
| rs1133323 | DBP        | NA        | COX5A;SCAMP2;RPP25;C15orf17;MPI | 13     | LDproxy(CEU-1kg)  | 0.75                    | rs11072518 | Whole blood (CHARGE)            | 1.57E-34      | 15  | 73021663 | 4480132         | ULK3              | cis                         | 12.26  | T      | 15               | 72915933       |
| rs1133323 | DBP        | NA        | COX5A;SCAMP2;RPP25;C15orf17;MPI | 13     | LDproxy(CEU-1kg)  | 0.75                    | rs11072518 | omental                         | 1.11E-13      | 15  | 73021663 | 10023814330     | MPI               | cis                         |        |        |                  |                |
| rs1133323 | DBP        | NA        | COX5A;SCAMP2;RPP25;C15orf17;MPI | 13     | LDproxy(CEU-1kg)  | 0.75                    | rs11072518 | Subc adipose (MuTHER)           | 8.68E-09      | 15  | 73021663 | ILMN_1679495    | ULK3              | cis                         |        |        |                  |                |
| rs1133323 | DBP        | NA        | COX5A;SCAMP2;RPP25;C15orf17;MPI | 13     | LDproxy(CEU-1kg)  | 0.75                    | rs11072518 | Lymph                           | 8.12E-08      | 15  | 73021663 | GI_4505234-S    | MPI               | cis                         |        |        |                  |                |
| rs1133323 | DBP        | NA        | COX5A;SCAMP2;RPP25;C15orf17;MPI | 13     | LDproxy(CEU-1kg)  | 0.75                    | rs11072518 | LCL (MuTHER)                    | 5.27E-07      | 15  | 73021663 | ILMN_1761262    | MPI               | cis                         |        |        |                  |                |
| rs1133323 | DBP        | NA        | COX5A;SCAMP2;RPP25;C15orf17;MPI | 13     | LDproxy(CEU-1kg)  | 0.75                    | rs11072518 | Skin (MuTHER)                   | 7.69E-07      | 15  | 73021663 | ILMN_1679495    | ULK3              | cis                         |        |        |                  |                |
| rs1133323 | DBP        | NA        | COX5A;SCAMP2;RPP25;C15orf17;MPI | 13     | LDproxy(CEU-1kg)  | 0.75                    | rs11072518 | Bcells (CD19+)                  | 3.32E-06      | 15  | 73021663 | ubt12t1w7_Z_FO  | CSK               | cis                         |        |        |                  |                |
| rs1133323 | DBP        | NA        | COX5A;SCAMP2;RPP25;C15orf17;MPI | 13     | LDproxy(CEU-1kg)  | 0.75                    | rs11072518 | Prefrontal cortex (Alzheimer's) | 3.32E-04      | 15  | 73021663 | 10023814330     | MPI               | cis                         |        |        |                  |                |
| rs1133323 | DBP        | NA        | COX5A;SCAMP2;RPP25;C15orf17;MPI | 13     | LDproxy(CEU-1kg)  | 0.75                    | rs11072518 | Monocytes (CD14+)               | 0.000374      | 15  | 73021663 | r_tdn3VF1vV3q\  | ULK3              | cis                         |        |        |                  |                |
| rs1133323 | DBP        | NA        | COX5A;SCAMP2;RPP25;C15orf17;MPI | 13     | LDproxy(CEU-1kg)  | 0.75                    | rs11072518 | Blood(Fehrmann et al)           | 1.90E-27;7.9E | 15  | 73021663 | 3170239;4480132 | CSK;ULK3;COX5A;SC | cis                         |        |        |                  |                |
| rs1133323 | DBP        | NA        | COX5A;SCAMP2;RPP25;C15orf17;MPI | 13     | LDproxy(CEU-Rel2) | 0.708                   | rs2290572  | Whole blood (CHARGE)            | 2.42E-29      | 15  | 72917626 | 4480132         | ULK3              | cis                         | 11.25  | A      | 15               | 72915933       |
| rs1133323 | DBP        | NA        | COX5A;SCAMP2;RPP25;C15orf17;MPI | 13     | LDproxy(CEU-Rel2) | 0.708                   | rs2290572  | LCL (MuTHER)                    | 1.67E-07      | 15  | 72917626 | ILMN_1761262    | MPI               | cis                         |        |        |                  |                |
| rs1133323 | DBP        | NA        | COX5A;SCAMP2;RPP25;C15orf17;MPI | 13     | LDproxy(CEU-Rel2) | 0.708                   | rs2290572  | Subc adipose (MuTHER)           | 1.58E-06      | 15  | 72917626 | ILMN_1679495    | ULK3              | cis                         |        |        |                  |                |
| rs1133323 | DBP        | NA        | COX5A;SCAMP2;RPP25;C15orf17;MPI | 13     | LDproxy(CEU-Rel2) | 0.708                   | rs2290572  | Bcells (CD19+)                  | 5.64E-06      | 15  | 72917626 | ubt12t1w7_Z_FO  | CSK               | cis                         |        |        |                  |                |
| rs1133323 | DBP        | NA        | COX5A;SCAMP2;RPP25;C15orf17;MPI | 13     | LDproxy(CEU-Rel2) | 0.708                   | rs2290572  | Skin (MuTHER)                   | 1.83E-05      | 15  | 72917626 | ILMN_1679495    | ULK3              | cis                         |        |        |                  |                |
| rs6092743 | DBP/SBP/MA | NA        | NA                              | 14     | LDproxy(CEU-1kg)  | 1                       | rs6026704  | Whole blood (CHARGE)            | 1.59E-08      | 20  | 57117540 | 4220259         | CTSZ              | cis                         | 5.65   | C      | 20               | 57003893       |
| rs6092743 | DBP/SBP/MA | NA        | NA                              | 14     | LDproxy(CEU-1kg)  | 1                       | rs7362597  | Whole blood (CHARGE)            | 1.60E-08      | 20  | 57112829 | 4220259         | CTSZ              | cis                         | 5.65   | A      | 20               | 57003893       |
| rs6092743 | DBP/SBP/MA | NA        | NA                              | 14     | LDproxy(CEU-1kg)  | 1                       | rs6100342  | Whole blood (CHARGE)            | 2.28E-08      | 20  | 57132656 | 4220259         | CTSZ              | cis                         | 5.59   | C      | 20               | 57003893       |
| rs6092743 | DBP/SBP/MA | NA        | NA                              | 14     | LDproxy(CEU-1kg)  | 1                       | rs882384   | Whole blood (CHARGE)            | 2.28E-08      | 20  | 57132808 | 4220259         | CTSZ              | cis                         | 5.59   | T      | 20               | 57003893       |
| rs6092743 | DBP/SBP/MA | NA        | NA                              | 14     | LDproxy(CEU-1kg)  | 1                       | rs998981   | Whole blood (CHARGE)            | 2.44E-08      | 20  | 57133036 | 4220259         | CTSZ              | cis                         | 5.58   | T      | 20               | 57003893       |
| rs6092743 | DBP/SBP/MA | NA        | NA                              | 14     | LDproxy(CEU-1kg)  | 1                       | rs6100343  | Whole blood (CHARGE)            | 2.70E-08      | 20  | 57133607 | 4220259         | CTSZ              | cis                         | 5.56   | A      | 20               | 57003893       |
| rs6092743 | DBP/SBP/MA | NA        | NA                              | 14     | LDproxy(CEU-1kg)  | 0.915                   | rs1465537  | Whole blood (CHARGE)            | 2.37E-08      | 20  | 57131415 | 4220259         | CTSZ              | cis                         | 5.58   | T      | 20               | 57003893       |
| rs6092743 | DBP/SBP/MA | NA        | NA                              | 14     | LDproxy(CEU-1kg)  | 0.85                    | rs6100340  | Whole blood (CHARGE)            | 2.53E-08      | 20  | 57118007 | 4220259         | CTSZ              | cis                         | 5.57   | G      | 20               | 57003893       |

**Table S6: PUUMA cohort characteristics.**

| <i>N</i> | Age,<br>years (sd) | BMI,<br>kg/m <sup>2</sup> (sd) | SBP, mmHg<br>(sd) | DBP,<br>mmHg (sd) | Anti-<br>hypertensive<br>therapy (%) | SBP, mmHg,<br>adjusted for<br>antihypertensive<br>therapy (sd) | DBP, mmHg,<br>adjusted for<br>antihypertensive<br>therapy (sd) |
|----------|--------------------|--------------------------------|-------------------|-------------------|--------------------------------------|----------------------------------------------------------------|----------------------------------------------------------------|
| 5,605    | 57.35 (9.02)       | 26.07 (3.38)                   | 133.92 (16.61)    | 74.92 (9.95)      | 33.52%                               | 138.95 (19.88)                                                 | 78.27 (11.42)                                                  |



**Table S7: LTA discovery analysis summary for loci with SNP association(s)  $P$  value  $< 5 \times 10^{-7}$ , and association results in GBPG Visit 1 BP analyses.A1**

| CHARGE DISCOVERY |            |     |           |         |         |           |                     |           |           |         |        |          | GBPG V1 Association Results |            |           |          |             |
|------------------|------------|-----|-----------|---------|---------|-----------|---------------------|-----------|-----------|---------|--------|----------|-----------------------------|------------|-----------|----------|-------------|
| Trait            | SNPID      | Chr | Pos2      | Allele1 | Allele2 | InRefGen  | RefGenes            | ClosestR  | Direction | Beta    | s.e.   | P        | Trait                       | SNPID      | Beta      | s.e.     | P           |
| CHARGE_LTA - DBP | rs1204627  | 1   | 10722164  | t       | c       | CASZ1     | CASZ1 CASZ1         | CASZ1     | -----?    | -0.3223 | 0.0597 | 2.29E-07 | GBPG V1-DBP                 | rs1204627  | -0.2799   | 0.0934   | 0.002726    |
| CHARGE_LTA - DBP | rs1330656  | 1   | 11788391  | a       | g       | MTHFR     | MTHFR;N MTHFR       | MTHFR     | +++++---- | 0.4789  | 0.0723 | 2.08E-10 | GBPG V1-DBP                 | rs1330656  | 0.4529    | 0.1083   | 0.00002905  |
| CHARGE_LTA - DBP | rs2004776  | 1   | 228915325 | t       | c       | AGT       | AGT;COG AGT         | AGT       | +++++---- | 0.3545  | 0.0615 | 3.20E-08 | GBPG V1-DBP                 | rs2004776  | 0.1014    | 0.091    | 0.2656      |
| CHARGE_LTA - DBP | rs1275988  | 2   | 26767868  | t       | c       |           | KCNK3;C1KCNK3       | KCNK3     | -----+    | -0.2814 | 0.0534 | 4.25E-07 | GBPG V1-DBP                 | rs1275988  | -0.1123   | 0.0775   | 0.1473      |
| CHARGE_LTA - DBP | rs7599598  | 2   | 96715567  | a       | g       |           | FLJ10081;FER1L5     | FLJ10081  | -----     | -0.314  | 0.0543 | 2.91E-08 | GBPG V1-DBP                 | rs7599598  | -0.0403   | 0.0799   | 0.6139      |
| CHARGE_LTA - DBP | rs1528293  | 3   | 170637205 | a       | t       | MDS1      | MDS1 MDS1           | MDS1      | +++++---- | 0.2738  | 0.0522 | 4.96E-07 | GBPG V1-DBP                 | rs1528293  | 0.2427    | 0.0769   | 0.00161     |
| CHARGE_LTA - DBP | rs1952650  | 5   | 157746045 | a       | t       |           | EBF1                | EBF1      | +++++---- | 0.2862  | 0.0523 | 1.58E-07 | GBPG V1-DBP                 | rs1952650  | 0.2984    | 0.0765   | 0.00009565  |
| CHARGE_LTA - DBP | rs198823   | 6   | 26230912  | t       | g       |           | HIST1H2E;HIST1H2E   | HIST1H2E  | -----+    | -0.3346 | 0.0553 | 6.57E-09 | GBPG V1-DBP                 | rs198823   | -0.1705   | 0.0801   | 0.03331     |
| CHARGE_LTA - DBP | rs1225896  | 10  | 18767965  | c       | g       | CACNB2    | CACNB2 CACNB2       | CACNB2    | +++++---- | 0.3548  | 0.0571 | 2.48E-09 | GBPG V1-DBP                 | rs1225896  | 0.2836    | 0.0834   | 0.0006716   |
| CHARGE_LTA - DBP | rs1224484  | 10  | 63109192  | t       | g       | C10orf107 | C10orf107 C10orf107 | C10orf107 | -----+    | -0.3784 | 0.0627 | 7.05E-09 | GBPG V1-DBP                 | rs1224484  | -0.432    | 0.0901   | 0.000001618 |
| CHARGE_LTA - DBP | rs12004172 | 12  | 20046661  | a       | t       |           | PDE3A               | PDE3A     | +++++---- | 0.3604  | 0.0651 | 1.09E-07 | GBPG V1-DBP                 | rs12004172 | 0.3446    | 0.091    | 0.0002492   |
| CHARGE_LTA - DBP | rs2681472  | 12  | 88533090  | a       | g       | ATP2B1    | ATP2B1 ATP2B1       | ATP2B1    | +++++---- | 0.5231  | 0.0691 | 4.01E-13 | GBPG V1-DBP                 | rs2681472  | 0.336     | 0.1065   | 0.001608    |
| CHARGE_LTA - DBP | rs3184504  | 12  | 110368991 | t       | c       | SH2B3     | SH2B3;AT SH2B3      | SH2B3     | +++++---- | 0.3936  | 0.0524 | 6.08E-13 | GBPG V1-DBP                 | rs3184504  | 0.4265    | 0.0789   | 6.361E-08   |
| CHARGE_LTA - DBP | rs1133323  | 15  | 72999278  | t       | c       |           | COX5A;MICOX5A       | COX5A     | -----     | -0.3262 | 0.0526 | 2.66E-09 | GBPG V1-DBP                 | rs1133323  | -0.2747   | 0.0763   | 0.000321    |
| CHARGE_LTA - DBP | rs167479   | 19  | 11387765  | t       | g       | RGL3      | EPOR;ELRGL3         | RGL3      | -----??   | -0.3913 | 0.0729 | 2.67E-07 | GBPG V1-DBP                 | rs167479   | -0.942    | 0.597    | 0.1146      |
| CHARGE_LTA - DBP | rs6092743  | 20  | 57133765  | a       | g       |           | C20orf174           | C20orf174 | +++++---- | 0.502   | 0.0843 | 1.11E-08 | GBPG V1-DBP                 | rs6092743  | 0.3393    | 0.1436   | 0.01814     |
| CHARGE_LTA - SBP | rs880315   | 1   | 10719453  | t       | c       | CASZ1     | CASZ1 CASZ1         | CASZ1     | -----?    | -0.7125 | 0.1005 | 7.98E-12 | GBPG V1-SBP                 | rs880315   | -0.2245   | 0.1504   | 0.1355      |
| CHARGE_LTA - SBP | rs1330656  | 1   | 11788391  | a       | g       | MTHFR     | MTHFR;N MTHFR       | MTHFR     | +++++---- | 0.8795  | 0.1235 | 6.38E-12 | GBPG V1-SBP                 | rs1330656  | 0.7349    | 0.1646   | 0.000007978 |
| CHARGE_LTA - SBP | rs2004776  | 1   | 228915325 | t       | c       | AGT       | AGT;COG AGT         | AGT       | +++++---- | 0.5488  | 0.1049 | 4.45E-07 | GBPG V1-SBP                 | rs2004776  | 0.1419    | 0.1395   | 0.3091      |
| CHARGE_LTA - SBP | rs1275988  | 2   | 26767868  | t       | c       | NA        | KCNK3;C1KCNK3       | KCNK3     | -----+    | -0.6004 | 0.0917 | 2.61E-10 | GBPG V1-SBP                 | rs1275988  | -0.2554   | 0.1175   | 0.02977     |
| CHARGE_LTA - SBP | rs6712094  | 2   | 164751706 | a       | g       | NA        | NA GRB14            | GRB14     | +++++---- | 0.598   | 0.1007 | 9.89E-09 | GBPG V1-SBP                 | rs6712094  | 0.4239    | 0.1298   | 0.001095    |
| CHARGE_LTA - SBP | rs9823197  | 3   | 11478133  | a       | t       | ATG7      | ATG7 ATG7           | ATG7      | -----+    | -0.4884 | 0.0915 | 2.58E-07 | GBPG V1-SBP                 | rs9823197  | -0.2888   | 0.1168   | 0.01344     |
| CHARGE_LTA - SBP | rs7733331  | 5   | 32864603  | t       | c       | NA        | C5orf23;N C5orf23   | C5orf23   | -----+    | -0.5505 | 0.0911 | 5.38E-09 | GBPG V1-SBP                 | rs7733331  | -0.4965   | 0.118    | 0.00002564  |
| CHARGE_LTA - SBP | rs1253434  | 7   | 27242452  | a       | g       | NA        | HOXA13;HEVX1        | HOXA13    | -----?    | -1.5903 | 0.292  | 1.48E-07 | GBPG V1-SBP                 | rs1253434  | -0.6512   | 0.3214   | 0.04273     |
| CHARGE_LTA - SBP | rs1270539  | 7   | 106198013 | a       | g       | NA        | NA PIK3CG           | PIK3CG    | +++++---- | 0.6307  | 0.11   | 3.17E-08 | GBPG V1-SBP                 | rs1270539  | 0.4007    | 0.1371   | 0.003466    |
| CHARGE_LTA - SBP | rs1267714  | 8   | 11488146  | c       | g       | NA        | BLK BLK             | BLK       | -----     | -0.5272 | 0.0988 | 2.60E-07 | GBPG V1-SBP                 | rs1267714  | -0.1581   | 0.1218   | 0.194       |
| CHARGE_LTA - SBP | rs1225896  | 10  | 18767965  | c       | g       | CACNB2    | CACNB2 CACNB2       | CACNB2    | +++++---- | 0.6307  | 0.0976 | 4.53E-10 | GBPG V1-SBP                 | rs1225896  | 0.3876    | 0.1268   | 0.002244    |
| CHARGE_LTA - SBP | rs7070797  | 10  | 63221779  | a       | g       | NA        | C10orf107 C10orf107 | C10orf107 | -----+    | -0.7415 | 0.1306 | 4.30E-08 | GBPG V1-SBP                 | rs7070797  | -0.6611   | 0.174    | 0.0001443   |
| CHARGE_LTA - SBP | rs1926032  | 10  | 104819459 | t       | c       | CNNM2     | NT5C2;CN CNNM2      | CNNM2     | -----+    | -0.9087 | 0.1715 | 3.15E-07 | GBPG V1-SBP                 | rs1926032  | -1.0971   | 0.2137   | 2.826E-07   |
| CHARGE_LTA - SBP | rs2681472  | 12  | 88533090  | a       | g       | ATP2B1    | ATP2B1 ATP2B1       | ATP2B1    | +++++---- | 0.9457  | 0.118  | 1.04E-14 | GBPG V1-SBP                 | rs2681472  | 0.6305    | 0.1646   | 0.0001282   |
| CHARGE_LTA - SBP | rs4766578  | 12  | 110388754 | a       | t       | ATXN2     | SH2B3;AT ATXN2      | SH2B3     | -----+    | -0.5599 | 0.0909 | 2.82E-09 | GBPG V1-SBP                 | rs4766578  | -0.4787   | 0.1201   | 0.00006713  |
| CHARGE_LTA - SBP | rs35444    | 12  | 114036820 | a       | g       | NA        | +++++---- TBX3      | TBX3      | +++++---- | 0.5452  | 0.0929 | 1.47E-08 | GBPG V1-SBP                 | rs35444    | 0.1568    | 0.1226   | 0.2009      |
| CHARGE_LTA - SBP | rs1107251  | 15  | 73021663  | t       | c       | NA        | COX5A;SICOX5A       | COX5A     | +++++---- | 0.5692  | 0.0947 | 6.54E-09 | GBPG V1-SBP                 | rs1107251  | 0.3548    | 0.12     | 0.003102    |
| CHARGE_LTA - SBP | rs6092743  | 20  | 57133765  | a       | g       | NA        | NA C20orf174        | C20orf174 | +++++---- | 0.8396  | 0.1449 | 2.25E-08 | GBPG V1-SBP                 | rs6092743  | 0.8599    | 0.2202   | 0.00009393  |
| CHARGE_LTA - MAP | rs880315   | 1   | 10719453  | t       | c       | CASZ1     | CASZ1 CASZ1         | CASZ1     | -----?    | -0.4597 | 0.067  | 5.49E-11 | GBPG V1-MAP                 | rs880315   | -0.244967 | 0.108505 | 0.023966954 |
| CHARGE_LTA - MAP | rs1330656  | 1   | 11788391  | a       | g       | MTHFR     | MTHFR;N MTHFR       | MTHFR     | +++++---- | 0.6133  | 0.0832 | 1.83E-12 | GBPG V1-MAP                 | rs1330656  | 0.5469    | 0.11748  | 3.23559E-06 |
| CHARGE_LTA - MAP | rs2004776  | 1   | 228915325 | t       | c       | AGT       | AGT;COG AGT         | AGT       | +++++---- | 0.4226  | 0.0708 | 1.18E-08 | GBPG V1-MAP                 | rs2004776  | 0.1149    | 0.099071 | 0.246143016 |
| CHARGE_LTA - MAP | rs1275988  | 2   | 26767868  | t       | c       | NA        | KCNK3;C1KCNK3       | KCNK3     | -----+    | -0.3894 | 0.0616 | 1.51E-09 | GBPG V1-MAP                 | rs1275988  | -0.16     | 0.083983 | 0.056759651 |
| CHARGE_LTA - MAP | rs6712094  | 2   | 164751706 | a       | g       | NA        | NA GRB14            | GRB14     | +++++---- | 0.385   | 0.0677 | 5.42E-08 | GBPG V1-MAP                 | rs6712094  | 0.2713    | 0.092326 | 0.003297944 |
| CHARGE_LTA - MAP | rs1528293  | 3   | 170637205 | a       | t       | MDS1      | MDS1 MDS1           | MDS1      | +++++---- | 0.3361  | 0.0602 | 9.29E-08 | GBPG V1-MAP                 | rs1528293  | 0.279367  | 0.083395 | 0.000808377 |
| CHARGE_LTA - MAP | rs7728845  | 5   | 122933582 | a       | g       | CSNK1G3   | CSNK1G3 CSNK1G3     | CSNK1G3   | +++++---- | 0.3766  | 0.0712 | 4.34E-07 | GBPG V1-MAP                 | rs7728845  | 0.3521    | 0.099069 | 0.000379275 |
| CHARGE_LTA - MAP | rs198846   | 6   | 26215442  | a       | g       | NA        | HIST1H2B HIST1H1T   | HIST1H2B  | +++++---- | 0.4829  | 0.085  | 5.69E-08 | GBPG V1-MAP                 | rs198846   | 0.5286    | 0.120456 | 1.1423E-05  |
| CHARGE_LTA - MAP | rs7794193  | 7   | 27261226  | a       | g       | NA        | HOXA13;EEVX1        | HOXA13    | -----+    | -0.914  | 0.1724 | 4.03E-07 | GBPG V1-MAP                 | rs7794193  | -0.296533 | 0.205208 | 0.148447395 |
| CHARGE_LTA - MAP | rs1225896  | 10  | 18767965  | c       | g       | CACNB2    | CACNB2 CACNB2       | CACNB2    | +++++---- | 0.452   | 0.0657 | 4.98E-11 | GBPG V1-MAP                 | rs1225896  | 0.318267  | 0.090482 | 0.000435732 |
| CHARGE_LTA - MAP | rs2166122  | 10  | 63193080  | t       | c       | C10orf107 | C10orf107 C10orf107 | C10orf107 | -----+    | -0.4812 | 0.0766 | 1.88E-09 | GBPG V1-MAP                 | rs2166122  | -0.439133 | 0.101765 | 1.5948E-05  |



| CHARGE DISCOVERY        |                  |           |                 |          |          |               |               |               |                |               |               |                 | GBPG V1 Association Results |                  |                 |                 |                    |
|-------------------------|------------------|-----------|-----------------|----------|----------|---------------|---------------|---------------|----------------|---------------|---------------|-----------------|-----------------------------|------------------|-----------------|-----------------|--------------------|
| Trait                   | SNPID            | Chr       | Pos2            | Allele1  | Allele2  | InRefGen      | RefGenes      | ClosestR      | Direction      | Beta          | s.e.          | P               | Trait                       | SNPID            | Beta            | s.e.            | P                  |
| CHARGE_LTA - MAP        | rs1084142        | 12        | 20046661        | a        | t        | NA            | NA            | PDE3A         | +++++++        | 0.4081        | 0.0749        | 1.91E-07        | GBPG V1-MAP                 | rs1084142        | 0.3641          | 0.102461        | 0.000380063        |
| <b>CHARGE_LTA - MAP</b> | <b>rs2681472</b> | <b>12</b> | <b>88533090</b> | <b>a</b> | <b>g</b> | <b>ATP2B1</b> | <b>ATP2B1</b> | <b>ATP2B1</b> | <b>+++++++</b> | <b>0.6861</b> | <b>0.0796</b> | <b>1.77E-16</b> | <b>GBPG V1-MAP</b>          | <b>rs2681472</b> | <b>0.434167</b> | <b>0.116348</b> | <b>0.000190261</b> |
| CHARGE_LTA - MAP        | rs3184504        | 12        | 110368991       | t        | c        | SH2B3         | SH2B3;AT      | SH2B3         | ++++-+++       | 0.4469        | 0.0605        | 1.68E-12        | GBPG V1-MAP                 | rs3184504        | 0.4366          | 0.085613        | 3.40191E-07        |
| CHARGE_LTA - MAP        | rs35444          | 12        | 114036820       | a        | g        | NA            | NA            | TBX3          | ++++-+-+       | 0.3621        | 0.0626        | 3.20E-08        | GBPG V1-MAP                 | rs35444          | 0.1762          | 0.087588        | 0.0442516          |
| CHARGE_LTA - MAP        | rs1107251        | 15        | 73021663        | t        | c        | NA            | COX5A;S       | COX5A         | ++++-+++       | 0.4315        | 0.0636        | 8.95E-11        | GBPG V1-MAP                 | rs1107251        | 0.308667        | 0.085802        | 0.000321354        |
| CHARGE_LTA - MAP        | rs167479         | 19        | 11387765        | t        | g        | RGL3          | EPOR;EL       | RGL3          | -----??        | -0.4521       | 0.0839        | 2.60E-07        | GBPG V1-MAP                 | rs167479         | -0.848267       | 0.716338        | 0.236345161        |
| CHARGE_LTA - MAP        | rs6092743        | 20        | 57133765        | a        | g        | NA            | NA            | C20orf174     | +++++++        | 0.6372        | 0.0971        | 3.60E-10        | GBPG V1-MAP                 | rs6092743        | 0.512833        | 0.156357        | 0.001038468        |
| CHARGE_LTA - PP         | rs880315         | 1         | 10719453        | t        | c        | CASZ1         | CASZ1         | CASZ1         | -----?         | -0.421        | 0.0703        | 5.45E-09        | GBPG V1-PP                  | rs880315         | 0.0307          | 0.106922        | 0.7740173          |
| CHARGE_LTA - PP         | rs7650227        | 3         | 41769941        | t        | g        | ULK4          | ULK4          | ULK4          | +++++++        | 0.5006        | 0.0821        | 2.84E-09        | GBPG V1-PP                  | rs7650227        | 0.1716          | 0.103931        | 0.098717837        |
| CHARGE_LTA - PP         | rs7733331        | 5         | 32864603        | t        | c        | NA            | C5orf23;NI    | C5orf23       | -----          | -0.3328       | 0.0629        | 2.57E-07        | GBPG V1-PP                  | rs7733331        | -0.2292         | 0.083972        | 0.006343693        |
| CHARGE_LTA - PP         | rs1094807        | 6         | 43388691        | t        | c        | NA            | CRIP3;SL      | CRIP3         | -----          | -0.3846       | 0.0652        | 9.06E-09        | GBPG V1-PP                  | rs1094807        | -0.2368         | 0.087317        | 0.00668842         |
| CHARGE_LTA - PP         | rs2949837        | 7         | 45960903        | a        | t        | NA            | IGFBP3        | IGFBP3        | +++++++        | 0.402         | 0.0706        | 2.94E-08        | GBPG V1-PP                  | rs2949837        | 0.1539          | 0.09346         | 0.099622491        |
| CHARGE_LTA - PP         | rs1270539        | 7         | 106198013       | a        | g        | NA            | NA            | PIK3CG        | ++++-+++       | 0.5865        | 0.0759        | 5.40E-14        | GBPG V1-PP                  | rs1270539        | 0.3968          | 0.097497        | 4.70E-05           |
| CHARGE_LTA - PP         | rs1225537        | 10        | 114798892       | t        | g        | TCF7L2        | TCF7L2        | TCF7L2        | +++++++        | 0.3527        | 0.0676        | 3.71E-07        | GBPG V1-PP                  | rs1225537        | 0.0856          | 0.093633        | 0.360610278        |
| CHARGE_LTA - PP         | rs2681485        | 12        | 88549753        | a        | g        | ATP2B1        | ATP2B1        | ATP2B1        | ++++-+++       | 0.3373        | 0.0627        | 1.61E-07        | GBPG V1-PP                  | rs2681485        | 0.1402          | 0.08435         | 0.096489798        |
| CHARGE_LTA - PP         | rs1077479        | 12        | 114036981       | t        | c        | NA            | NA            | TBX3          | -----          | -0.3362       | 0.0649        | 4.61E-07        | GBPG V1-PP                  | rs1077479        | 0.0242          | 0.085378        | 0.776834436        |
| CHARGE_LTA - PP         | rs672154         | 20        | 10421266        | a        | g        | C20orf94      | MKKS;C2       | C20orf94      | -----          | -0.3288       | 0.0629        | 3.54E-07        | GBPG V1-PP                  | rs672154         | -0.1229         | 0.084282        | 0.144783527        |
| CHARGE_LTA - PP         | rs6077869        | 20        | 10598510        | a        | g        | JAG1          | JAG1;C20      | JAG1          | ++++-+++       | 0.3803        | 0.0732        | 4.15E-07        | GBPG V1-PP                  | rs6077869        | 0.11            | 0.098691        | 0.265026095        |

Rows in **bold** show LTA analysis  $P$  values  $< 5 \times 10^{-8}$ .

**Table S8: Summary of number of SNPs and loci identified by LTA**

| <b>Number of significant SNPs</b> |                                     |          | <b>Number of significant Loci</b> |                                     |          |
|-----------------------------------|-------------------------------------|----------|-----------------------------------|-------------------------------------|----------|
|                                   | <i>P</i> value < 5x10 <sup>-8</sup> |          |                                   | <i>P</i> value < 5x10 <sup>-8</sup> |          |
|                                   | #LTA SNPs                           | #V1 SNPs |                                   | #LTA loci                           | #V1 loci |
| SBP                               | 117                                 | 122      | SBP                               | 13                                  | 8        |
| DBP                               | 96                                  | 126      | DBP                               | 10                                  | 9        |
| MAP                               | 155                                 | 153      | MAP                               | 11                                  | 9        |
| PP                                | 120                                 | 1        | PP                                | 5                                   | 1        |
| Total                             | 488                                 | 402      | Total                             | 39                                  | 27       |

**Table S9: Distribution of LTA *P* values as compared to the corresponding V1 BP trait analysis *P* values**

|                                 |                                        |                              |                                         |
|---------------------------------|----------------------------------------|------------------------------|-----------------------------------------|
| SBP (delta distribution)        | Extreme values* (right tail+left tail) | Non-Extreme values (central) | Chisquare test <i>P</i> value < 2.2e-16 |
| Total SNP distributed as normal | 40013                                  | 2480814                      |                                         |
| LTA SNP (pGC<5e-8)              | 101                                    | 16                           |                                         |
| DBP (delta distribution)        | Extreme values* (right tail+left tail) | Non-Extreme values (central) | Chisquare test <i>P</i> value < 2.2e-16 |
| Total SNP distributed as normal | 29775                                  | 2491052                      |                                         |
| LTA SNP (pGC<5e-8)              | 64                                     | 32                           |                                         |
| MAP (delta distribution)        | Extreme values* (right tail+left tail) | Non-Extreme values (central) | Chisquare test <i>P</i> value < 2.2e-16 |
| Total SNP distributed as normal | 32885                                  | 2487942                      |                                         |
| LTA SNP (pGC<5e-8)              | 123                                    | 32                           |                                         |
| PP (delta distribution)         | Extreme values* (right tail+left tail) | Non-Extreme values (central) | Chisquare test <i>P</i> value < 2.2e-16 |
| Total SNP distributed as normal | 36139                                  | 2484688                      |                                         |
| LTA SNP (pGC<5e-8)              | 120                                    | 0                            |                                         |

\*Extreme values are defined as values that are larger than 'mean+3\*sd' or smaller than 'mean-3\*sd'

**Table S10: Power simulations for the application of LTA to SBP.**

**a: Correlation between the 4 visits for SBP residual adjusted for BMI, age, and age\*age and gender in ARIC.**

|        | <b>SBP<br/>V1</b> | <b>SBP<br/>V2</b> | <b>SBP<br/>V3</b> | <b>SBP<br/>V4</b> |
|--------|-------------------|-------------------|-------------------|-------------------|
| SBP V1 | 1.00              | 0.73              | 0.65              | 0.60              |
| SBP V2 | 0.73              | 1.00              | 0.72              | 0.64              |
| SBP V3 | 0.65              | 0.72              | 1.00              | 0.70              |
| SBP V4 | 0.60              | 0.64              | 0.70              | 1.00              |

**b1: Power Estimates. Sample size N = 1000 and testing at alpha=0.05. The true effect size is 0.1. Monte Carlo size 10,000.**

| <b>q</b>       | <b>0.05</b> | <b>0.10</b> | <b>0.20</b> | <b>0.30</b> | <b>0.40</b> |
|----------------|-------------|-------------|-------------|-------------|-------------|
| Visit 1        | 0.16        | 0.27        | 0.43        | 0.52        | 0.59        |
| LTA            | 0.19        | 0.33        | 0.52        | 0.63        | 0.70        |
| GEE (4 visits) | 0.20        | 0.34        | 0.52        | 0.64        | 0.70        |

**b2: Power Estimates, Null Hypothesis. Sample size N = 1000 and testing at alpha=0.05.  
The true effect size is 0. Monte Carlo size 10,000.**

| <b>q</b>       | <b>0.05</b> | <b>0.10</b> | <b>0.20</b> | <b>0.30</b> | <b>0.40</b> |
|----------------|-------------|-------------|-------------|-------------|-------------|
| Visit 1        | 0.050       | 0.048       | 0.048       | 0.050       | 0.047       |
| LTA            | 0.053       | 0.051       | 0.052       | 0.048       | 0.048       |
| GEE (4 visits) | 0.059       | 0.052       | 0.051       | 0.051       | 0.050       |

**c: Sample size N = 10000 and testing at alpha = 5x10<sup>-8</sup>. The true effect size is 0.05. Monte Carlo size 5,000.**

|                | <b>0.05</b> | <b>0.1</b> | <b>0.2</b> | <b>0.3</b> | <b>0.4</b> |
|----------------|-------------|------------|------------|------------|------------|
| Visit 1        | 0           | 0.001      | 0.005      | 0.011      | 0.023      |
| LTA            | 0           | 0.002      | 0.015      | 0.039      | 0.070      |
| GEE (4 visits) | 0           | 0.002      | 0.015      | 0.039      | 0.071      |

**Table S11: Enrichment analysis results**

| Stronger results in LTA versus V1 analysis | Summary of lead SNPs and LTA and V1 results |            |         |       |           |           |                   |                |             |             | Tested Region  |              |        | Pvalue of Kolmogorov–Smirnov statistics with 10000 permutations |                   | Pvalue of 10000 times Bootstrapping compared to the statistics from the |                   |
|--------------------------------------------|---------------------------------------------|------------|---------|-------|-----------|-----------|-------------------|----------------|-------------|-------------|----------------|--------------|--------|-----------------------------------------------------------------|-------------------|-------------------------------------------------------------------------|-------------------|
|                                            | trait                                       | SNPID      | Allele1 | Chr   | Position  | InRefGene | RefGenes.60kbfrom | ClosestRefGene | LTA P value | V1 P value  | Position Start | Position End | # SNPs | D-.Pvalue                                                       | D+.Pvalue         | D-.Pvalue                                                               | D+.Pvalue         |
| LTA                                        | SBP                                         | rs13306561 | a       | 1p36  | 11788391  | MTHFR     | MTHFR;NPPA;CLCN   | MTHFR          | 6.38E-12    | 1.11E-07    | 11775103       | 11847887     | 102    | 0.4522                                                          | <b>1.00E-04</b>   | 0.3983                                                                  | <b>&lt;0.0001</b> |
| LTA                                        | SBP                                         | rs1275988  | t       | 2p23  | 26767868  | NA        | KCNK3;CIB4        | KCNK3          | 2.61E-10    | 1.38E-05    | 26765249       | 26786300     | 10     | 1                                                               | <b>&lt;0.0001</b> | 1                                                                       | <b>&lt;0.0001</b> |
| LTA                                        | SBP                                         | rs6712094  | a       | 2q24  | 164751706 | NA        | NA                | GRB14          | 9.89E-09    | 5.22E-07    | 164722539      | 164839114    | 175    | 0.6859                                                          | <b>2.00E-04</b>   | 0.7081                                                                  | <b>&lt;0.0001</b> |
| LTA                                        | SBP                                         | rs7733331  | t       | 5p13  | 32864603  | NA        | C5orf23;NPR3      | C5orf23        | 5.38E-09    | 0.000141351 | 32810804       | 32867696     | 43     | 1                                                               | <b>0.0016</b>     | 1                                                                       | <b>4.00E-04</b>   |
| LTA                                        | SBP                                         | rs12705390 | a       | 7q22  | 106198013 | NA        | NA                | PIK3CG         | 3.17E-08    | 2.63E-05    | 106192878      | 106199094    | 20     | 0.956                                                           | <b>4.00E-04</b>   | 0.9823                                                                  | <b>1.00E-04</b>   |
| LTA                                        | SBP                                         | rs7070797  | a       | 10q21 | 63221779  | NA        | C10orf107         | C10orf107      | 4.30E-08    | 1.17E-06    | 63190704       | 63221779     | 48     | 0.7187                                                          | <b>0.0024</b>     | 0.7434                                                                  | <b>1.00E-04</b>   |
| LTA                                        | DBP                                         | rs13306561 | a       | 1p36  | 11788391  | MTHFR     | MTHFR;NPPA;CLCN   | MTHFR          | 2.08E-10    | 1.28E-07    | 11783430       | 11828561     | 83     | 0.7217                                                          | <b>&lt;0.0001</b> | 0.7821                                                                  | <b>&lt;0.0001</b> |
| LTA                                        | DBP                                         | rs1952650  | a       | 5q33  | 157746045 | NA        | NA                | EBF1           | 1.58E-07    | 2.16E-05    | 157746045      | 157746045    | 82     | 0.3685                                                          | <b>&lt;0.0001</b> | 0.3102                                                                  | <b>&lt;0.0001</b> |
| LTA                                        | DBP                                         | rs198823   | t       | 6p22  | 26230912  | NA        | HIST1H2BD;HIST1H2 | HIST1H2BC      | 6.57E-09    | 4.52E-06    | 26150218       | 26233321     | 155    | 0.8544                                                          | <b>&lt;0.0001</b> | 0.8949                                                                  | <b>&lt;0.0001</b> |
| LTA                                        | DBP                                         | rs3184504  | t       | 12q24 | 110368991 | SH2B3     | SH2B3;ATXN2       | SH2B3          | 6.08E-13    | 1.26E-08    | 110368991      | 111390798    | 277    | 0.9517                                                          | <b>&lt;0.0001</b> | 0.9721                                                                  | <b>&lt;0.0001</b> |
| LTA                                        | MAP                                         | rs880315   | t       | 1p36  | 10719453  | CASZ1     | CASZ1             | CASZ1          | 5.49E-11    | 1.47E-07    | 10713384       | 10724576     | 9      | 0.856                                                           | <b>0.0081</b>     | 0.9464                                                                  | <b>0.0042</b>     |
| LTA                                        | MAP                                         | rs13306561 | a       | 1p36  | 11788391  | MTHFR     | MTHFR;NPPA;CLCN   | MTHFR          | 1.83E-12    | 1.48E-08    | 11775103       | 11847887     | 104    | 0.7774                                                          | <b>1.00E-04</b>   | 0.8154                                                                  | <b>&lt;0.0001</b> |
| LTA                                        | MAP                                         | rs1275988  | t       | 2p23  | 26767868  | NA        | KCNK3;CIB4        | KCNK3          | 1.51E-09    | 7.06E-06    | 26765249       | 26786300     | 10     | 1                                                               | <b>3.00E-04</b>   | 1                                                                       | <b>&lt;0.0001</b> |
| LTA                                        | MAP                                         | rs2681472  | a       | 12q21 | 88533090  | ATP2B1    | ATP2B1            | ATP2B1         | 1.77E-16    | 1.70E-12    | 88465680       | 88637201     | 132    | 0.3985                                                          | <b>&lt;0.0001</b> | 0.3285                                                                  | <b>&lt;0.0001</b> |
| LTA                                        | PP                                          | rs10948071 | t       | 6p21  | 43388691  | NA        | CRIP3;SLC22A7;TTE | CRIP3          | 9.06E-09    | 0.000111242 | 43367990       | 43440164     | 49     | 0.9211                                                          | <b>&lt;0.0001</b> | 0.9491                                                                  | <b>&lt;0.0001</b> |
| LTA                                        | PP                                          | rs2949837  | a       | 7p13  | 45960903  | NA        | IGFBP3            | IGFBP3         | 2.94E-08    | 6.88E-06    | 45929639       | 45960903     | 49     | 1                                                               | <b>&lt;0.0001</b> | 1                                                                       | <b>&lt;0.0001</b> |
| LTA                                        | PP                                          | rs12705390 | a       | 7q22  | 106198013 | NA        | NA                | PIK3CG         | 5.40E-14    | 1.20E-06    | 106192878      | 106206532    | 24     | 0.612                                                           | <b>5.00E-04</b>   | 0.7028                                                                  | <b>&lt;0.0001</b> |
| V1                                         | SBP                                         | rs2004776  | t       | 1q42  | 228915325 | AGT       | AGT;COG2;CAPN9    | AGT            | 4.45E-07    | 4.63E-08    | 228903667      | 228916422    | 76     | <b>0.0061</b>                                                   | 0.9914            | <b>4.00E-04</b>                                                         | 1                 |
| V1                                         | SBP                                         | rs4766578  | a       | 12q24 | 110388754 | ATXN2     | SH2B3;ATXN2       | ATXN2          | 2.82E-09    | 1.18E-09    | 110368991      | 110556807    | 201    | <b>&lt;0.0001</b>                                               | 0.7427            | <b>&lt;0.0001</b>                                                       | 0.7695            |
| V1                                         | SBP                                         | rs11072518 | t       | 15q24 | 73021663  | NA        | COX5A;SCAMP5;RP   | COX5A          | 6.54E-09    | 2.93E-11    | 72820453       | 73029208     | 90     | <b>&lt;0.0001</b>                                               | 0.7609            | <b>&lt;0.0001</b>                                                       | 0.8024            |
| V1                                         | SBP                                         | rs6092743  | a       | 20q13 | 57133765  | NA        | NA                | C20orf174      | 2.25E-08    | 2.18E-09    | 57112829       | 57194118     | 67     | <b>1.00E-04</b>                                                 | 0.9868            | <b>&lt;0.0001</b>                                                       | 0.9975            |
| V1                                         | DBP                                         | rs2004776  | t       | 1q42  | 228915325 | AGT       | AGT;COG2;CAPN9    | AGT            | 3.20E-08    | 1.53E-08    | 228915325      | 228915982    | 50     | <b>0.0057</b>                                                   | 0.9252            | <b>0.001</b>                                                            | 0.9622            |
| V1                                         | DBP                                         | rs12258967 | c       | 10p12 | 18767965  | CACNB2    | CACNB2            | CACNB2         | 2.48E-09    | 3.71E-09    | 18747454       | 18780638     | 51     | <b>0.0195</b>                                                   | 0.7355            | <b>0.0048</b>                                                           | 0.7591            |
| V1                                         | DBP                                         | rs1133323  | t       | 15q24 | 72999278  | NA        | COX5A;MPI;SCAMP2  | COX5A          | 2.66E-09    | 4.89E-10    | 72806502       | 73029208     | 109    | <b>&lt;0.0001</b>                                               | 0.3275            | <b>&lt;0.0001</b>                                                       | 0.2717            |
| V1                                         | DBP                                         | rs6092743  | a       | 20q13 | 57133765  | NA        | NA                | C20orf174      | 1.11E-08    | 3.37E-11    | 57108080       | 57194118     | 71     | <b>&lt;0.0001</b>                                               | 0.7041            | <b>&lt;0.0001</b>                                                       | 0.7368            |
| V1                                         | MAP                                         | rs2004776  | t       | 1q42  | 228915325 | AGT       | AGT;COG2;CAPN9    | AGT            | 1.18E-08    | 2.45E-09    | 228882807      | 228929783    | 105    | <b>0.0336</b>                                                   | 0.9726            | <b>0.0078</b>                                                           | 0.9898            |
| V1                                         | MAP                                         | rs12258967 | c       | 10p12 | 18767965  | CACNB2    | CACNB2            | CACNB2         | 4.98E-11    | 5.57E-10    | 18726458       | 18780638     | 91     | 0.0843                                                          | 0.4946            | <b>0.0355</b>                                                           | 0.4722            |
| V1                                         | MAP                                         | rs11072518 | t       | 15q24 | 73021663  | NA        | COX5A;SCAMP5;RP   | COX5A          | 8.95E-11    | 1.86E-12    | 72806502       | 73029208     | 95     | <b>&lt;0.0001</b>                                               | 0.5105            | <b>&lt;0.0001</b>                                                       | 0.4795            |
| Mixed effect                               | DBP                                         | rs12244842 | t       | 10q21 | 63109192  | C10orf107 | C10orf107         | C10orf107      | 7.05E-09    | 6.15E-08    | 63109192       | 63221779     | 158    | <b>0.0348</b>                                                   | <b>&lt;0.0001</b> | <b>0.0101</b>                                                           | <b>&lt;0.0001</b> |
| Mixed effect                               | MAP                                         | rs2166122  | t       | 10q21 | 63193080  | C10orf107 | C10orf107         | C10orf107      | 1.88E-09    | 4.76E-08    | 63109192       | 63221779     | 142    | 0.0565                                                          | <b>&lt;0.0001</b> | <b>0.0184</b>                                                           | <b>&lt;0.0001</b> |
| Mixed effect                               | MAP                                         | rs3184504  | t       | 12q24 | 110368991 | SH2B3     | SH2B3;ATXN2       | SH2B3          | 1.68E-12    | 3.71E-10    | 110368991      | 111390798    | 316    | <b>&lt;0.0001</b>                                               | 0.06              | <b>&lt;0.0001</b>                                                       | <b>0.0192</b>     |
| Mixed effect                               | MAP                                         | rs6092743  | a       | 20q13 | 57133765  | NA        | NA                | C20orf174      | 3.60E-10    | 1.12E-11    | 57108080       | 57194118     | 73     | <b>&lt;0.0001</b>                                               | 0.0924            | <b>&lt;0.0001</b>                                                       | <b>0.0439</b>     |
| Mixed effect                               | PP                                          | rs7650227  | t       | 3p22  | 41769941  | ULK4      | ULK4              | ULK4           | 2.84E-09    | 4.38E-06    | 41725264       | 42040009     | 201    | <b>0.0042</b>                                                   | <b>&lt;0.0001</b> | <b>8.00E-04</b>                                                         | <b>&lt;0.0001</b> |
| No difference                              | SBP                                         | rs880315   | t       | 1p36  | 10719453  | CASZ1     | CASZ1             | CASZ1          | 7.98E-12    | 7.20E-09    | 10713384       | 10724576     | 9      | 0.8669                                                          | 0.2722            | 0.9464                                                                  | 0.3158            |
| No difference                              | SBP                                         | rs12258967 | c       | 10p12 | 18767965  | CACNB2    | CACNB2            | CACNB2         | 4.53E-10    | 1.53E-08    | 18726458       | 18780638     | 91     | 0.9551                                                          | 0.2148            | 0.9822                                                                  | 0.1264            |
| No difference                              | SBP                                         | rs2681472  | a       | 12q21 | 88533090  | ATP2B1    | ATP2B1            | ATP2B1         | 1.04E-14    | 1.69E-11    | 88465680       | 88637201     | 132    | 0.1781                                                          | 0.2263            | 0.1116                                                                  | 0.1561            |
| No difference                              | SBP                                         | rs35444    | a       | 12q24 | 114036820 | NA        | NA                | TBX3           | 1.47E-08    | 2.63E-06    | 114036820      | 114039913    | 14     | 0.7564                                                          | 0.3222            | 0.7963                                                                  | 0.2573            |
| No difference                              | DBP                                         | rs7599598  | a       | 2q11  | 96715567  | NA        | FLJ10081;FER1L5;L | FER1L5         | 2.91E-08    | 6.54E-08    | 96715567       | rs7599598    | 1      | 1                                                               | 0.4993            | 1                                                                       | 0.5046            |
| No difference                              | DBP                                         | rs1801253  | c       | 10q25 | 115795046 | ADRB1     | ADRB1             | ADRB1          | 7.22E-06    | 2.58E-08    | 115782052      | 115795046    | 9      | 0.1765                                                          | 0.8999            | 0.112                                                                   | 0.9477            |
| No difference                              | DBP                                         | rs2681472  | a       | 12q21 | 88533090  | ATP2B1    | ATP2B1            | ATP2B1         | 4.01E-13    | 8.68E-11    | 88465680       | 88637201     | 132    | 0.1105                                                          | 0.3348            | 0.0576                                                                  | 0.2681            |
| No difference                              | MAP                                         | rs1801253  | c       | 10q25 | 115795046 | ADRB1     | ADRB1             | ADRB1          | 7.32E-07    | 7.10E-09    | 115779365      | 115795046    | 9      | 0.1665                                                          | 0.8955            | 0.1032                                                                  | 0.9494            |
| No difference                              | MAP                                         | rs35444    | a       | 12q24 | 114036820 | NA        | NA                | TBX3           | 3.20E-08    | 8.38E-07    | 114036820      | 114039913    | 14     | 0.7605                                                          | 0.3228            | 0.7945                                                                  | 0.2617            |
| No difference                              | PP                                          | rs880315   | t       | 1p36  | 10719453  | CASZ1     | CASZ1             | CASZ1          | 5.45E-09    | 3.31E-06    | 10713384       | 10722164     | 6      | 0.8323                                                          | 0.1492            | 0.8929                                                                  | 0.1943            |
| No difference                              | PP                                          | rs12631867 | a       | 3p24  | 30437485  | NA        | NA                | TGFBR2         | 0.023903474 | 9.25E-10    | 30437485       | rs12631867   | 1      | 0.5002                                                          | 1                 | 0.5043                                                                  | 1                 |

## **SUPPLEMENTAL COHORT DESCRIPTIONS**

### **Cohort Descriptions**

#### **Discovery cohorts**

The CHARGE Consortium<sup>1</sup> includes cohort studies that completed genome-wide genotyping and had extensive data on multiple phenotypes including blood pressure. Each study adopted collaboration guidelines and established a consensus on phenotype harmonization, covariate selection and an analytical plan for within-study genome-wide association and prospective meta-analysis of results across studies. Each study received institutional review board approval of its consent procedures, examination and surveillance components, data security measures, and DNA collection and its use for genetic research. All participants provided written informed consent.

In the current analysis, most of the participating cohorts were general population samples (AGES, ARIC, CHS, FHS, RS, MESA, CARDIA). Demographic information, blood pressure, height, and weight were directly measured in all participants, except for the Women's Genome Health Study as described. All studies with GWAS data used hidden Markov model approaches<sup>2-4</sup> and HapMap reference panels<sup>5</sup> to impute genotypes at unmeasured SNPs and excluded SNPs, so that a common set of ~2.5M HapMap SNPs were available across the discovery samples<sup>4,6</sup>. All studies with GWAS data used hidden Markov model approaches<sup>1-3</sup> and HapMap reference panels<sup>4</sup> to impute genotypes at unmeasured SNPs and excluded SNPs, so that a common set of ~2.5M HapMap SNPs were available across the discovery samples<sup>4,6</sup>.

#### **AGES Reykjavik**

The Age Gene/Environment Susceptibility-Reykjavik (AGES- Reykjavik) Study cohort originally comprised a random sample of 30,795 men and women born in 1907-1935 and living in Reykjavik in 1967. A total of 19,381 people attended, resulting in 71% recruitment rate. The study sample was divided into six groups by birth year and birth date within month. One group was designated for longitudinal follow up and was examined in all stages. One group was designated a control group and was not included in examinations until 1991. Other groups were invited to participate in specific stages of the study. Between 2002 and 2006, the AGES-Reykjavik study re-examined 5764 survivors of the original cohort who had participated before in the Reykjavik Study.<sup>7</sup> The midlife data blood pressure measurement was taken from stage 3 of the Reykjavik Study (1974-1979), if available. Half of the cohort attended during this period. Otherwise an observation was selected closest in time to the stage 3 visit. Participants came in a fasting state to the clinic. The supine blood pressure was measured twice by a nurse using a mercury sphygmomanometer after a 5-min rest. Blood pressure was measured according to World Health Organization recommendations. Individuals with previous MI were excluded from the analyses (n=12). Successful genotyping was available for 3219 AGES participants who were eligible for this study. The AGES Reykjavik Study GWAS was approved by the National Bioethics Committee and the Data Protection Authority.

#### **ARIC**

The Atherosclerosis Risk In Communities Study (ARIC) study is a population-based prospective cohort study of cardiovascular disease sponsored by National Heart, Lung, and Blood Institute (NHLBI). ARIC included 15,792 individuals aged 45-64 years at baseline (1987-89), chosen by

probability sampling from four US communities<sup>8</sup> Cohort members completed four clinic examinations, conducted three years apart between 1987 and 1998. The data used in this study are from all four visits. A detailed study protocol is available on the ARIC study website (<http://www.csc.unc.edu/aric>). Clinic examinations included assessment of cardiovascular disease risk factors, a detailed medical and psychosocial history, and measurement of various clinical and laboratory variables. The physical examination included measurements of weight and height from which the body mass index (BMI) was calculated. Blood pressure was measured using a standardized Hawksley random-zero mercury column sphygmomanometer with participants in sitting position after a resting period of 5 minutes. The size of the cuff was chosen according to the arm circumference. For the first three visits, three sequential recordings for systolic and diastolic blood pressure were obtained and the mean of the last two measurements used in this analysis. At the fourth visit, two blood pressure measurements were taken and averaged. Blood pressure lowering medication use was recorded from the medication history. Outliers (>4SD from the mean) with respect to the systolic or diastolic blood pressure distribution were excluded from the analysis. For this investigation we limited the sample to individuals of European descent by self-report and in whom GWAS was carried out.

### **CARDIA**

The Coronary Artery Risk Development in Young Adults (CARDIA) is a prospective multicenter study with 5115 adults Caucasian and African American participants of the age group 18-30 years, recruited from four centers at the baseline examination in 1985-1986. The recruitment was done from the total community in Birmingham, AL, from selected census tracts in Chicago, IL and Minneapolis, MN; and from the Kaiser Permanente health plan membership in Oakland, CA. The details of the study design for the CARDIA study have been previously published.<sup>17</sup> Eight examinations have been completed since initiation of the study, respectively in the years 0, 2, 5, 7, 10, 15, 20 and 25. Written informed consent was obtained from participants at each examination and all study protocols were approved by the institutional review boards of the participating institutions. At each examination, systolic and diastolic blood pressure was measured in triplicate on the right arm using a random-zero sphygmomanometer with the participant seated and following a 5-min. rest. The average of the second and third measurements was taken as the blood pressure value. Blood pressure medication use was obtained by questionnaire. Blood pressure data measured at year 7 through year 20 were used in this study. In addition, the sample was restricted to individuals of European descent by self-report and principal component analysis using genome-wide genotypes.

### **CHS**

The CHS is a population-based cohort study of risk factors for cardiovascular disease in adults 65 years of age or older conducted across four field centers. The original predominantly white cohort of 5201 persons was recruited in 1989-1990 from random samples of the Medicare eligibility lists and an additional 687 African-Americans were enrolled in 1992-93 for a total sample of 5888. Details of the study design are summarized elsewhere<sup>9</sup>. A total of 1908 persons were excluded from the study sample due to prevalent coronary heart disease (n=1195), congestive heart failure (n=86), peripheral vascular disease (n=93), valvular heart disease (n=20), stroke (n=166) or transient ischemic attack (n=56). Participants with missing BMI (n=10) or BP measurements (n=8) were excluded. CHS participants completed standardized clinical examinations and questionnaires at study baseline and at nine annual follow-up visits. Research staff who received central training in blood pressure measurement assessed repeat right-arm seated systolic and diastolic blood pressure levels at baseline with a

Hawksley random-zero sphygmomanometer. Means of the repeated blood pressure measurements from the baseline examination were used for GWAS analyses. Because the other cohorts were predominantly white, African American participants were excluded from this analysis. 3,159 CHS subjects contributed to this analysis.

## **FHS**

The Framingham Heart Study (FHS) began in 1948 with the recruitment of an original cohort of 5,209 men and women who were 28 to 62 years of age (mean age 44 years; 55 percent women) at entry. In 1971 enrollment of a second generation of study participants took place; this cohort consisted of 5,124 children and spouses of children of the original cohort. The mean age of the offspring cohort was 37 years; 52 percent were women. A third generation cohort The FHS began in 1948 with the recruitment of an original cohort of 5,209 men and women who were 28 to 62 years of age (mean age 44 years; 55 percent women) at entry. In 1971 enrollment of a second generation of study participants took place; this cohort consisted of 5,124 children and spouses of children of the original cohort. The mean age of the offspring cohort was 37 years; 52 percent were women.<sup>10-12</sup> At each clinic visit, a medical history was obtained with a focus on cardiovascular content, and participants underwent a physical examination including measurement of height and weight from which BMI was calculated. Systolic and diastolic blood pressures were measured twice by a physician on the left arm of the resting and seated participant using a mercury column sphygmomanometer. Pressures were recorded to the nearest even number. The means of two separate systolic and diastolic blood pressure readings at the first clinic examination of each cohort were used for GWAS analyses. For a subset of offspring cohort participants only one measurement was obtained. Individuals under 20 years of age, those who had a myocardial infarction, or congestive heart failure were excluded from the analyses because those conditions may affect blood pressure levels.

## **MESA**

The Multi-Ethnic Study of Atherosclerosis investigation is a population-based study of 6,814 men and women age 45 to 85 years, without clinical cardiovascular disease, recruited from six United States communities (Baltimore, MD; Chicago, IL; Forsyth County, NC; Los Angeles County, CA; northern Manhattan, NY; and St. Paul, MN). The main objective of MESA is to determine the characteristics of subclinical cardiovascular disease and its progression. Sampling and recruitment procedures have been previously described in detail.<sup>15</sup> Adults with symptoms or history of medical or surgical treatment for cardiovascular disease were excluded. During the recruitment process, potential participants were asked about their race/ethnicity. Self-reported ethnicity was used to classify participants into groups.<sup>16</sup> After a 5-minute rest BP was measured three times at 1 minute intervals using a Dinamap PRO 100 automated oscillometric device (Critikon, Tampa, FL) with the subject in seated, and the average of the second and third BP measurements was recorded for each visit. Data from white participants, collected at MESA exams 1 through 4, was used in this analysis.

## **Rotterdam Study - RS1, RS2**

The RS is a prospective population-based cohort study comprising 7,983 subjects aged 55 years or older. Participants completed an interview at home and at the research center, where participants were subsequently examined. Baseline data were collected between 1990 and 1993. In 1999, inhabitants who turned 55 years of age or moved into the study district since the start of the study were invited to participate in an extension of the RS (RES) of whom 3011



participated (67% response rate). The rationale and design of the RS have been described in detail elsewhere.<sup>13</sup> At the research center, we obtained two seated blood pressure measurements in the right brachial artery with a random zero sphygmomanometer. The mean of two consecutive measurements was used in association analyses. We excluded participants who were older than 85 years of age and those who had a history myocardial infarction or congestive heart failure, because of the impact of these conditions on blood pressure levels.

## **WGHS**

The Women's Genome Health Study (WGHS)<sup>14</sup> is a prospective cohort of female North American health care professionals representing participants in the Women's Health Study (WHS) trial who provided a blood sample at baseline and consent for blood-based analyses. Participants in the WHS were 45 years or older at enrolment and free of cardiovascular disease, cancer or other major chronic illness. For the primary WHS endpoints of cardiovascular disease, full medical records were obtained for reported endpoints and reviewed by an endpoints committee of physicians unaware of assignment. The current data are derived from 23,294 WGHS participants for whom whole genome genotype information was available at the time of analysis and for whom self-reported European ancestry could be confirmed by multidimensional scaling analysis of 1,443 ancestry informative markers in PLINK v. 1.06. Baseline BP in the WGHS was ascertained by a self-reported questionnaire, an approach which has been validated in the WGHS demographic, namely female health care professionals. Questionnaires recorded systolic blood pressure in 9 categories (<110, 110-119, 120-129, 130-139, 140-149, 150-159, 160-169, 170-179, ≥180 mmHg), and diastolic blood pressure in 7 categories (<65, 65-74, 75-84, 85-89, 90-94, 95-104, ≥105 mmHg). The midpoint of each category was used for analysis. Hypertension was defined as a history of physician-diagnosed HTN and ongoing HTN treatment, or SBP ≥ 140 or DBP ≥ 90 mmHg. To account for treatment effects, 10 and 5 mmHg were added to the measured systolic and diastolic blood pressures respectively, if a participant was taking antihypertensive medication.

## **Replication Cohorts**

The replication cohorts in this analysis were used to test the reproducibility of novel discovered loci which were identified by the use of the LTA method. The replication cohorts all provided single-visit BP traits. All participants provided written informed consent and studies were approved by their local Institutional Review Boards or Research Ethics Committees.

### **Global BP Gen (GBPG)**

Single-visit BP traits were previously analyzed in 17 cohorts, and the results of the meta-analysis have been previously reported.<sup>18</sup> Adjustment was performed for the use of anti-hypertensive medications using similar methods as we used in the discovery analysis. The same covariates were included in the individual cohort analyses, including age, age-squared, body mass index, and gender, as in the LTA discovery analyses.

### **Peking University – University of Michigan Study of Atherosclerosis (PUUMA) Beijing Shijensheng Cohort**

The Peking University – University of Michigan Study of Atherosclerosis (PUUMA) is based upon the enrollment of individuals at two hospitals in the Peking University Health Science

system: PKU First Hospital and PKU Third Hospital. There were several sources of samples, including the cardiac catheterization laboratories of the hospitals and a community-based enrollment in Beijing Shijingsheng district. The single-visit BP analyses reported in this study were based upon the community based enrollment of 5,065 unrelated individuals (confirmed by exome wide genotypes) which represents a population sample of Han Chinese from Beijing. Blood pressure was recorded using the Omron 7100 machine three times at 2-minute interval in a seated position. The average of three readings was used for the analysis. Genotyping was performed using the Illumina Exome Plus chip with additional custom content based upon sequencing of additional individuals of Asian ancestry and candidate SNPs identified in prior BP association studies. QC was performed as described elsewhere (manuscript in preparation). Association analyses were implemented in PLINK, and genomic control was applied to the final association statistics.

## SUPPLEMENTAL ACKNOWLEDGMENTS

### LTA Discovery Cohorts:

**AGES:** Age, Gene/Environment Susceptibility (AGES) Reykjavik Study is funded by NIH contract N01-AG-12100, the NIA Intramural Research Program, Hjartavernd (the Icelandic Heart Association) and the Althingi (the Icelandic Parliament). The study is approved by the Icelandic National Bioethics Committee, VSN: 00-063.

**ARIC:** The Atherosclerosis Risk in Communities (ARIC) Study is carried out as a collaborative study supported by National Heart, Lung, and Blood Institute contracts (HHSN268201100005C, HHSN268201100006C, HHSN268201100007C, HHSN268201100008C, HHSN268201100009C, HHSN268201100010C, HHSN268201100011C, and HHSN268201100012C), R01HL087641, R01HL59367 and R01HL086694; National Human Genome Research Institute contract U01HG004402; and National Institutes of Health contract HHSN268200625226C. The authors thank the staff and participants of the ARIC study for their important contributions. Infrastructure was partly supported by Grant Number UL1RR025005, a component of the National Institutes of Health and NIH Roadmap for Medical Research. The meta-analysis and meta-regression analyses were funded by grant R01 HL086694 from the National Heart, Lung, and Blood Institute.

**CARDIA:** The Coronary Artery Risk Development in Young Adults Study (CARDIA) is conducted and supported by the National Heart, Lung, and Blood Institute in collaboration with the University of Alabama at Birmingham (HHSN268201300025C & HHSN268201300026C), Northwestern University (HHSN268201300027C), University of Minnesota (HHSN268201300028C), Kaiser Foundation Research Institute (HHSN268201300029C), and Johns Hopkins University School of Medicine (HHSN268200900041C). CARDIA is also partially supported by the Intramural Research Program of the National Institute on Aging. This manuscript has been reviewed by CARDIA for scientific content. Genotyping of the CARDIA participants and statistical data analysis was supported by grants U01-HG-004729 from the National Human Genome Research Institute and R01-HL-084099 from the National Heart, Lung and Blood Institute to MF. The authors thank the investigators and staff of the GENEVA coordinating center and genotyping center, as well as the staff and participants of the CARDIA study for their important contributions.

**Cardiovascular Health Study:** This CHS research was supported by NHLBI contracts HHSN268201200036C, HHSN268200800007C, N01HC55222, N01HC85079, N01HC85080, N01HC85081, N01HC85082, N01HC85083, N01HC85086; and NHLBI grants HL080295, HL087652, HL105756 with additional contribution from the National Institute of Neurological Disorders and Stroke (NINDS). Additional support was provided through AG023629 from the National Institute on Aging (NIA). A full list of CHS investigators and institutions can be found at <http://chs-nhlbi.org/>. The provision of genotyping data was supported in part by the National Center for Advancing Translational Sciences, CTSI grant UL1TR000124, and the National Institute of Diabetes and Digestive and Kidney Disease Diabetes Research Center (DRC) grant DK063491 to the Southern California Diabetes Endocrinology Research Center.

**FHS:** The National Heart, Lung, and Blood Institute's Framingham Heart Study (FHS) is a joint project of the National Institutes of Health and Boston University School of Medicine and was supported by the National Heart, Lung, and Blood Institute's Framingham Heart Study (contract No. N01-HC-25195) and its contract with Affymetrix, Inc. for genotyping services (contract No. N02-HL-6-4278). Analyses reflect the efforts and resource development from the Framingham Heart Study investigators participating in

the SNP Health Association Resource (SHARe) project. A portion of this research was conducted using the Linux Cluster for Genetic Analysis (LinGAI) funded by the Robert Dawson Evans Endowment of the Department of Medicine at Boston University School of Medicine and Boston Medical Center.

**MESA:** The Multi-Ethnic Study of Atherosclerosis (MESA) and the MESA SHARe project are conducted and supported by the National Heart, Lung, and Blood Institute (NHLBI) in collaboration with MESA investigators. Support is provided by grants and contracts N01 HC-95159, N01-HC-95160, N01-HC-95161, N01-HC-95162, N01-HC-95163, N01-HC-95164, N01-HC-95165, N01-HC-95166, N01-HC-95167, N01-HC-95168, N01-HC-95169 and RR-024156. Funding for SHARe genotyping was provided by NHLBI Contract N02-HL-6-4278. Genotyping was performed at the Broad Institute of Harvard and MIT (Boston, Massachusetts, USA) and at Affymetrix (Santa Clara, California, USA).

**RS I and RS II:** The GWA database of the Rotterdam Study was funded through the Netherlands Organisation of Scientific Research NWO (nr. 175.010.2005.011). The Rotterdam Study is supported by the Erasmus Medical Center and Erasmus University, Rotterdam; the Netherlands Organization for Scientific Research (NWO), the Netherlands Organization for Health Research and Development (ZonMw), the Research Institute for Diseases in the Elderly (RIDE), the Ministry of Education, Culture and Science, the Ministry for Health, Welfare and Sports, the European Commission (DG XII), and the Municipality of Rotterdam. Abbas Dehghan is supported by NWO grant (veni, 916.12.154) and the EUR Fellowship.

**WGHS:** The WGHS is funded by the Donald W. Reynolds Foundation (Las Vegas, NV), the Fondation LeDucq (Paris, France), the National Heart, Lung and Blood Institute (NHLBI; HL043851) and the National Cancer Institute (NCI; CA047988). Funding for genotyping and collaborative scientific support was provided by Amgen.

### **Reproducibility studies with single-visit BP traits:**

This work forms part of the research themes contributing to the translational research portfolio for the NIHR Barts Cardiovascular Biomedical Research Unit.

**BHS:** The Busselton Health Study acknowledges the generous support for the 1994/5 follow-up study from Healthway, Western Australia and the numerous Busselton community volunteers who assisted with data collection and the study participants from the Shire of Busselton. The Busselton Health Study is supported by The Great Wine Estates of the Margaret River region of Western Australia. The study gratefully acknowledges the assistance of the Western Australian DNA Bank (NHMRC Enabling Facility) with DNA samples and the support provided by the Ark (NHMRC Enabling Facility) for this study.

**CoLaus:** The CoLaus authors thank Yolande Barreau, Mathieu Firmann, Vladimir Mayor, Anne-Lise Bastian, Binasa Ramic, Martine Moranville, Martine Baumer, Marcy Sagette, Jeanne Ecoffey, and Sylvie Mermoud for data collection. The CoLaus study received financial contributions from GlaxoSmithKline, the Faculty of Biology and Medicine of Lausanne, the Swiss National Science Foundation (33CSO-122661, 3200BO-111361/2, 3100AO-116323/1, 310000-112552), the Swiss School of Public Health Plus, the Giorgi-Cavaglieri Foundation, the European Framework Project 6 (EuroDia, AnEuploidy and Hypergenes projects).

**EPIC-Norfolk:** The EPIC Norfolk study is supported by programme grants from the Medical Research Council, and Cancer Research UK. We acknowledge the contribution of the staff and participants of the EPIC-Norfolk Study.

**Fenland:** The Fenland Study is funded by the Medical Research Council (MC\_U106179471). We are grateful to all the volunteers for their time and help, and to the General Practitioners and practice staff for assistance with recruitment. We thank the Fenland Study Investigators, Fenland Study Co-ordination team and the Epidemiology Field, Data and Laboratory teams.

**KORA S3:** KORA S3 500K blood pressure project was supported by Estonian Ministry of Education and Science core grant no SF0180022s12 (to M.L). The KORA Augsburg studies have been financed by the Helmholtz Zentrum München, German Research Center for Environmental Health, Neuherberg, Germany and supported by grants from the German Federal Ministry of Education and Research (BMBF). The KORA study group consists of H-E. Wichmann (speaker), A. Peters, C. Meisinger, T. Illig, R. Holle, J. John and co-workers who are responsible for the design and conduct of the KORA studies. Part of this work was financed by the German National Genome Research Network (NGFN-2 and NGFNPlus:01GS0823) and supported within the Munich Center of Health Sciences (MC Health) as part of LMUinnovativ.

**LifeLines:** The LifeLines Cohort Study, and generation and management of GWAS genotype data for the LifeLines Cohort Study is supported by the Netherlands Organization of Scientific Research NWO (grant 175.010.2007.006), the Economic Structure Enhancing Fund (FES) of the Dutch government, the Ministry of Economic Affairs, the Ministry of Education, Culture and Science, the Ministry for Health, Welfare and Sports, the Northern Netherlands Collaboration of Provinces (SNN), the Province of Groningen, University Medical Center Groningen, the University of Groningen, Dutch Kidney Foundation and Dutch Diabetes Research Foundation. We thank Behrooz Alizadeh, Annemieke Boesjes, Marcel Bruinenberg, Noortje Festen, Pim van der Harst, Ilja Nolte, Lude Franke, Mitra Valimohammadi for their help in creating the GWAS database, and Rob Bieringa, Joost Keers, René Oostergo, Rosalie Visser, Judith Vonk for their work related to data-collection and validation. The authors are grateful to the study participants, the staff from the LifeLines Cohort Study and Medical Biobank Northern Netherlands, and the participating general practitioners and pharmacists.

**MIGen:** The Myocardial Infarction Genetics Consortium (MIGen) was funded by grant R01 HL087676 (NIH, USA). This work was supported by the European Regional Development Fund (ERDF-FEDER), the Spanish Ministry of Economy and Innovation through the Carlos III Health Institute [CIBER Epidemiología y Salud Pública, Red de Investigación Cardiovascular, Heracles Program RD12/0042, PI09/90506], the Catalan Research and Technology Innovation Interdepartmental Commission [SGR 1195] and Fundació La Marató de TV3 [81810]. GL was funded by the Juan de la Cierva Program, Ministerio de Educación (JCI-2009-04684). Study Concept and Design: David Altshuler, Sekar Kathiresan, Diego Ardissino, Pier M Mannucci, David S Siscovick, Christopher J O'Donnell, Leena Peltonen, Veikko Salomaa, Stephen M Schwartz, Olle Melander; Phenotype Data Acquisition/QC: Stephen M Schwartz; Genotype Data Acquisition/QC: Benjamin F Voight, Shaun Purcell

**NESDA:** The infrastructure for the NESDA study is funded through the Geestkracht programme of the Dutch Scientific Organization (ZON-MW, grant number 10-000-1002) and matching funds from participating universities and mental health care organizations. Genotyping in NESDA was funded by the Genetic Association Information Network (GAIN) of the Foundation for the US National Institutes of Health. Statistical analyses were carried out on the Genetic Cluster Computer

(<http://www.geneticcluster.org>), which is financially supported by the Netherlands Scientific Organization (NWO 480-05-003) along with a supplement from the Dutch Brain Foundation.

**PREVEND:** PREVEND genetics is supported by the Dutch Kidney Foundation (Grant E033), the EU project grant GENECURE (FP-6 LSHM CT 2006 037697), the National Institutes of Health (grant LM010098), The Netherlands organisation for health research and development (NWO VENI grant 916.761.70 & ZonMw grant 90.700.441), and the Dutch Inter University Cardiology Institute Netherlands (ICIN).

**PROCARDIS** was supported by the European Community Sixth Framework Program (LSHM-CT-2007-037273), AstraZeneca, the British Heart Foundation, the Swedish Research Council, the Knut and Alice Wallenberg Foundation, the Swedish Heart-Lung Foundation, the Torsten and Ragnar Söderberg Foundation, the Strategic Cardiovascular Program of Karolinska Institutet and Stockholm County Council, the Foundation for Strategic Research and the Stockholm County Council (560283). MF and HW acknowledge support from the Oxford British Heart Foundation Centre of Research Excellence and a Wellcome Trust core award (075491/Z/04).

**SardiNIA:** The work was supported by the National Institute on Aging, Intramural Research Program.

**SCES, SiMES, SINDI and SP2:** SCES, SiMES, SINDI, and SP2 acknowledge the support of the Yong Loo Lin School of Medicine, the National University Health System and the Life Sciences Institute from the National University of Singapore. The National Medical Research Council provided support through the individual research grant, the clinician scientist award and Singapore translational investigator award schemes. The Biomedical research council in Singapore also provided support through the individual research grant scheme. We also acknowledge the support from the National Research Foundation of Singapore (NRF-RF-2010-05).

**SHIP:** SHIP was funded by grants from the German Federal Ministry of Education and Research (BMBF, Grants 01ZZ0403, 01ZZ0103, 01GI0883), the Ministry for Education, Research and Cultural Affairs as well as the Ministry of Social Affairs of the Federal State of Mecklenburg-West Pomerania. Genome-wide data have been supported by the Federal Ministry of Education and Research (grant no. 03ZIK012) and a joint grant from Siemens Healthcare, Erlangen, Germany and the Federal State of Mecklenburg- West Pomerania. The University of Greifswald is a member of the 'Center of Knowledge Interchange' program of the Siemens AG.

**SUVIMAX:** We thank the Commissariat à l'Energie Atomique, the Université Paris 13, the Conservatoire National des Arts et Métiers, the Institut National de la Recherche Agronomique and the Institut National de la Santé et de la Recherche Médicale for their financial support.

**TRAILS** (TRacking Adolescents' Individual Lives Survey) is a collaborative project involving various departments of the University Medical Center and University of Groningen, the Erasmus University Medical Center Rotterdam, the University of Utrecht, the Radboud Medical Center Nijmegen, and the Parnassia Bavo group, all in the Netherlands. TRAILS has been financially supported by grants from the Netherlands Organization for Scientific Research NWO (Medical Research Council program grant GB-MW 940-38-011; ZonMw Brainpower grant 100-001-004; ZonMw Risk Behavior and Dependence grants 60-60600-98-018 and 60-60600-97-118; ZonMw Culture and Health grant 261-98-710; Social Sciences Council medium-sized investment grants GB-MaGW 480-01-006 and GB-MaGW 480-07-001; Social

Sciences Council project grants GB-MaGW 457-03-018, GB-MaGW 452-04-314, and GB-MaGW 452-06-004; NWO large-sized investment grant 175.010.2003.005; NWO Longitudinal Survey and Panel Funding 481-08-013); the Sophia Foundation for Medical Research (projects 301 and 393), the Dutch Ministry of Justice (WODC), the European Science Foundation (EuroSTRESS project FP-006), and the participating universities. We are grateful to all adolescents, their parents and teachers who participated in this research and to everyone who worked on this project and made it possible. Statistical analyses were carried out on the Genetic Cluster Computer (<http://www.geneticcluster.org>), which is financially supported by the Netherlands Scientific Organization (NWO 480-05-003) along with a supplement from the Dutch Brain Foundation.

**YFS:** The Young Finns Study has been financially supported by the Academy of Finland: grants 134309 (Eye), 126925, 121584, 124282, 129378 (Salve), 117787 (Gendi), and 41071 (Skidi), the Social Insurance Institution of Finland, Kuopio, Tampere and Turku University Hospital Medical Funds (grant 9M048 and 9N035 for TeLeht), Juho Vainio Foundation, Paavo Nurmi Foundation, Finnish Foundation of Cardiovascular Research and Finnish Cultural Foundation, Tampere Tuberculosis Foundation and Emil Aaltonen Foundation (T.L). The expert technical assistance in the statistical analyses by Ville Aalto and Irina Lisinen is gratefully acknowledged.

**The Peking University-University of Michigan Study of Atherosclerosis (PUUMA)** is funded by the University of Michigan Health System and Peking University Health Science Center Joint Institute for Translational and Clinical Research. Dr. Ganesh was supported, in part, by NHLBI P30HL101290.

## SUPPLEMENTAL REFERENCES

1. Psaty, B.M. *et al.* Cohorts for Heart and Aging Research in Genomic Epidemiology (CHARGE) Consortium: Design of prospective meta-analyses of genome-wide association studies from 5 cohorts. *Circ Cardiovasc Genet* **2**, 73-80 (2009).
2. Servin, B. & Stephens, M. Imputation-based analysis of association studies: candidate regions and quantitative traits. *PLoS Genet* **3**, e114 (2007).
3. Marchini, J. & Howie, B. Genotype imputation for genome-wide association studies. *Nat Rev Genet* **11**, 499-511.
4. Li, Y., Willer, C., Sanna, S. & Abecasis, G. Genotype imputation. *Annu Rev Genomics Hum Genet* **10**, 387-406 (2009).
5. International HapMap, C. The International HapMap Project. *Nature* **426**, 789-96 (2003).
6. Guan, Y. & Stephens, M. Practical issues in imputation-based association mapping. *PLoS Genet* **4**, e1000279 (2008).
7. Harris, T.B. *et al.* Age, Gene/Environment Susceptibility-Reykjavik Study: multidisciplinary applied phenomics. *Am J Epidemiol* **165**, 1076-87 (2007).
8. The Atherosclerosis Risk in Communities (ARIC) Study: design and objectives. The ARIC investigators. *Am J Epidemiol* **129**, 687-702 (1989).
9. Fried, L.P. *et al.* The Cardiovascular Health Study: design and rationale. *Ann Epidemiol* **1**, 263-76 (1991).
10. Dawber, T.R., Meadors, G.F. & Moore, F.E., Jr. Epidemiological approaches to heart disease: the Framingham Study. *Am J Public Health Nations Health* **41**, 279-81 (1951).
11. Feinleib, M., Kannel, W.B., Garrison, R.J., McNamara, P.M. & Castelli, W.P. The Framingham Offspring Study. Design and preliminary data. *Prev Med* **4**, 518-25 (1975).
12. Splansky, G.L. *et al.* The Third Generation Cohort of the National Heart, Lung, and Blood Institute's Framingham Heart Study: design, recruitment, and initial examination. *Am J Epidemiol* **165**, 1328-35 (2007).
13. Hofman, A. *et al.* The Rotterdam Study: objectives and design update. *Eur J Epidemiol* **22**, 819-29 (2007).
14. Ridker, P.M. *et al.* Rationale, design, and methodology of the Women's Genome Health Study: a genome-wide association study of more than 25,000 initially healthy american women. *Clin Chem* **54**, 249-55 (2008).
15. Kramer, H. *et al.* Racial/ethnic differences in hypertension and hypertension treatment and control in the multi-ethnic study of atherosclerosis (MESA). *Am J Hypertens* **17**, 963-70 (2004).
16. Bild, D.E. *et al.* Multi-ethnic study of atherosclerosis: objectives and design. *Am J Epidemiol* **156**, 871-81 (2002).
17. Friedman, G.D. *et al.* CARDIA: study design, recruitment, and some characteristics of the examined subjects. *J Clin Epidemiol* **41**, 1105-16 (1988).
18. Newton-Cheh, C. *et al.* Genome-wide association study identifies eight loci associated with blood pressure. *Nat Genet* (2009).
19. Johnson, A.D. *et al.* SNAP: a web-based tool for identification and annotation of proxy SNPs using HapMap. *Bioinformatics*. **24**, 2938-2939 (2008).
20. Goring, H.H. *et al.* Discovery of expression QTLs using large-scale transcriptional profiling in human lymphocytes. *Nat. Genet.* **39**, 1208-1216 (2007).
21. Idaghdour, Y. *et al.* Geographical genomics of human leukocyte gene expression variation in southern Morocco. *Nat Genet* **42**, 62-67.



22. Heap, G.A. *et al.* Complex nature of SNP genotype effects on gene expression in primary human leucocytes. *BMC Med Genomics* **2**, 1 (2009).
23. The Genotype-Tissue Expression (GTEx) project. *Nat.Genet.* **45**, 580-585 (2013).
24. Battle, A. *et al.* Characterizing the genetic basis of transcriptome diversity through RNA-sequencing of 922 individuals. *Genome Res.* **24**, 14-24 (2014).
25. Benton, M.C. *et al.* Mapping eQTLs in the Norfolk Island genetic isolate identifies candidate genes for CVD risk traits. *Am.J.Hum.Genet.* **93**, 1087-1099 (2013).
26. Emilsson, V. *et al.* Genetics of gene expression and its effect on disease. *Nature* **452**, 423-428 (2008).
27. Fehrmann, R.S. *et al.* Trans-eQTLs reveal that independent genetic variants associated with a complex phenotype converge on intermediate genes, with a major role for the HLA. *PLoS Genet* **7**, e1002197.
28. Landmark-Hoyvik, H. *et al.* Genome-wide association study in breast cancer survivors reveals SNPs associated with gene expression of genes belonging to MHC class I and II. *Genomics* **102**, 278-287 (2013).
29. Mehta, D. *et al.* Impact of common regulatory single-nucleotide variants on gene expression profiles in whole blood. *Eur.J.Hum.Genet.* **21**, 48-54 (2013).
30. Sasayama, D. *et al.* Identification of single nucleotide polymorphisms regulating peripheral blood mRNA expression with genome-wide significance: an eQTL study in the Japanese population. *PLoS.One.* **8**, e54967 (2013).
31. van Eijk, K.R. *et al.* Genetic analysis of DNA methylation and gene expression levels in whole blood of healthy human subjects. *BMC.Genomics* **13**, 636 (2012).
32. Westra, H.J. *et al.* Systematic identification of trans eQTLs as putative drivers of known disease associations. *Nat.Genet.* **45**, 1238-1243 (2013).
33. Zhernakova, D.V. *et al.* DeepSAGE Reveals Genetic Variants Associated with Alternative Polyadenylation and Expression of Coding and Non-coding Transcripts. *PLoS.Genet.* **9**, e1003594 (2013).
34. Dixon, A.L. *et al.* A genome-wide association study of global gene expression. *Nat Genet* **39**, 1202-1207 (2007).
35. Liang, L. *et al.* A cross-platform analysis of 14,177 expression quantitative trait loci derived from lymphoblastoid cell lines. *Genome Res.* (2013).
36. Stranger, B.E. *et al.* Patterns of cis regulatory variation in diverse human populations. *PLoS Genet.* **8**, e1002639 (2012).
37. Kwan, T. *et al.* Genome-wide analysis of transcript isoform variation in humans. *Nat.Genet.* **40**, 225-231 (2008).
38. Cusanovich, D.A. *et al.* The combination of a genome-wide association study of lymphocyte count and analysis of gene expression data reveals novel asthma candidate genes. *Hum.Mol.Genet.* **21**, 2111-2123 (2012).
39. Dimas, A.S. *et al.* Common regulatory variation impacts gene expression in a cell type-dependent manner. *Science* **325**, 1246-1250 (2009).
40. Grundberg, E. *et al.* Mapping cis- and trans-regulatory effects across multiple tissues in twins. *Nat.Genet.* **44**, 1084-1089 (2012).
41. Gutierrez-Arcelus, M. *et al.* Passive and active DNA methylation and the interplay with genetic variation in gene regulation. *Elife.* **2**, e00523 (2013).
42. Mangravite, L.M. *et al.* A statin-dependent QTL for GATM expression is associated with statin-induced myopathy. *Nature* **502**, 377-380 (2013).
43. Fairfax, B.P. *et al.* Genetics of gene expression in primary immune cells identifies cell type-specific master regulators and roles of HLA alleles. *Nat.Genet.* **44**, 502-510 (2012).

44. Murphy, A. *et al.* Mapping of numerous disease-associated expression polymorphisms in primary peripheral blood CD4+ lymphocytes. *Hum Mol Genet* **19**, 4745-4757.
45. Heinzen, E.L. *et al.* Tissue-specific genetic control of splicing: implications for the study of complex traits. *PLoS Biol* **6**, e1 (2008).
46. Zeller, T. *et al.* Genetics and beyond--the transcriptome of human monocytes and disease susceptibility. *PLoS One* **5**, e10693.
47. Barreiro, L.B. *et al.* Deciphering the genetic architecture of variation in the immune response to Mycobacterium tuberculosis infection. *Proc.Natl.Acad.Sci.U.S.A* **109**, 1204-1209 (2012).
48. Huang, R.S. *et al.* Population differences in microRNA expression and biological implications. *RNA.Biol.* **8**, 692-701 (2011).
49. Degner, J.F. *et al.* DNase I sensitivity QTLs are a major determinant of human expression variation. *Nature* **482**, 390-394 (2012).
50. Greenawalt, D.M. *et al.* A survey of the genetics of stomach, liver, and adipose gene expression from a morbidly obese cohort. *Genome Res* **21**, 1008-1016.
51. Kompass, K.S. & Witte, J.S. Co-regulatory expression quantitative trait loci mapping: method and application to endometrial cancer. *BMC.Med.Genomics* **4**, 6 (2011).
52. Li, Q. *et al.* Integrative eQTL-based analyses reveal the biology of breast cancer risk loci. *Cell* **152**, 633-641 (2013).
53. Webster, J.A. *et al.* Genetic control of human brain transcript expression in Alzheimer disease. *Am J Hum Genet* **84**, 445-458 (2009).
54. Zou, F. *et al.* Brain expression genome-wide association study (eGWAS) identifies human disease-associated variants. *PLoS Genet* **8**, e1002707.
55. Colantuoni, C. *et al.* Temporal dynamics and genetic control of transcription in the human prefrontal cortex. *Nature* **478**, 519-523.
56. Kim, S., Cho, H., Lee, D. & Webster, M.J. Association between SNPs and gene expression in multiple regions of the human brain. *Transl.Psychiatry* **2**, e113 (2012).
57. Liu, C. *et al.* Whole-genome association mapping of gene expression in the human prefrontal cortex. *Mol Psychiatry* **15**, 779-784.
58. Gamazon, E.R. *et al.* Enrichment of cis-regulatory gene expression SNPs and methylation quantitative trait loci among bipolar disorder susceptibility variants. *Mol.Psychiatry* **18**, 340-346 (2013).
59. Gibbs, J.R. *et al.* Abundant quantitative trait loci exist for DNA methylation and gene expression in human brain. *PLoS Genet* **6**, e1000952.
60. Zhang, B. *et al.* Integrated systems approach identifies genetic nodes and networks in late-onset Alzheimer's disease. *Cell* **153**, 707-720 (2013).
61. Innocenti, F. *et al.* Identification, replication, and functional fine-mapping of expression quantitative trait loci in primary human liver tissue. *PLoS Genet* **7**, e1002078.
62. Schadt, E.E. *et al.* Mapping the genetic architecture of gene expression in human liver. *PLoS Biol* **6**, e107 (2008).
63. Schroder, A. *et al.* Genomics of ADME gene expression: mapping expression quantitative trait loci relevant for absorption, distribution, metabolism and excretion of drugs in human liver. *Pharmacogenomics.J.* **13**, 12-20 (2013).
64. Grundberg, E. *et al.* Population genomics in a disease targeted primary cell model. *Genome Res.* **19**, 1942-1952 (2009).
65. Kabakchiev, B. & Silverberg, M.S. Expression quantitative trait loci analysis identifies associations between genotype and gene expression in human intestine. *Gastroenterology* **144**, 1488-96, 1496 (2013).

66. Keildson, S. *et al.* Skeletal Muscle Expression of Phosphofructokinase is Influenced by Genetic Variation and Associated with Insulin Sensitivity. *Diabetes* (2013).
67. Quigley, D.A. *et al.* The 5p12 breast cancer susceptibility locus affects MRPS30 expression in estrogen-receptor positive tumors. *Mol.Oncol.* (2013).
68. Gao, C. *et al.* HEFT: eQTL analysis of many thousands of expressed genes while simultaneously controlling for hidden factors. *Bioinformatics.* (2013).
69. Hao, K. *et al.* Lung eQTLs to help reveal the molecular underpinnings of asthma. *PLoS.Genet.* **8**, e1003029 (2012).
70. Ding, J. *et al.* Gene expression in skin and lymphoblastoid cells: Refined statistical method reveals extensive overlap in cis-eQTL signals. *Am.J.Hum.Genet.* **87**, 779-789 (2010).
71. Qiu, W. *et al.* Genetics of sputum gene expression in chronic obstructive pulmonary disease. *PLoS.One.* **6**, e24395 (2011).
72. Lin, H. *et al.* Gene expression and genetic variation in human atria. *Heart Rhythm.* (2013).
73. Rantalainen, M. *et al.* MicroRNA expression in abdominal and gluteal adipose tissue is associated with mRNA expression levels and partly genetically driven. *PLoS One* **6**, e27338 (2011).
